# Supplementary material for: YY1 and CTCF orchestrate a 3D chromatin looping switch during early neural lineage commitment
Source: PubMed Central journal article supplement — Genome Res. 2017 Jul;27(7):1139–52. doi: 10.1101/gr.215160.116 (PMC5495066; doi:10.1101/gr.215160.116), 2017-07
Supplement: supp_gr.215160.116_Supplemental_Fig_S1.pdf [file supp_gr.215160.116_Supplemental_Fig_S1.pdf]

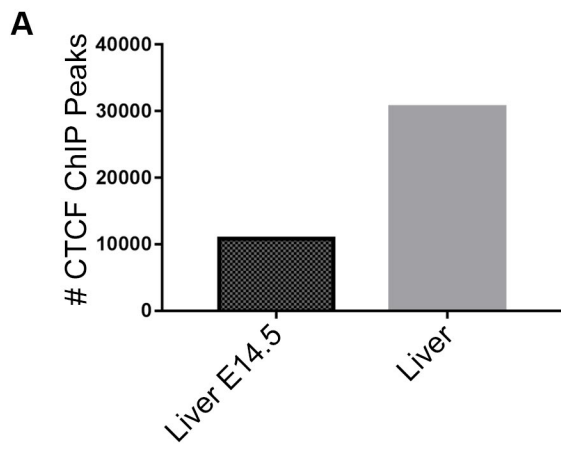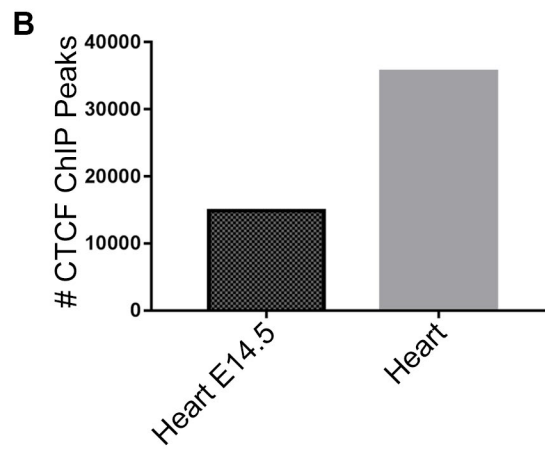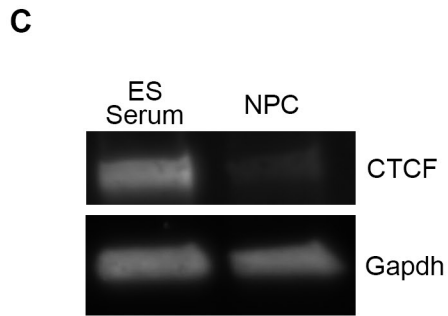

**Supplemental Figure S1. Genome-wide CTCF occupancy may not decrease during lineage commitment in some tissues. (A)** Number of CTCF binding sites across mouse ENCODE embryonic and adult liver tissues. **(B)** Number of CTCF binding sites across mouse ENCODE embryonic and adult heart tissues. All ChIPseq data from (Shen et al. 2012). **(C)** Western blot analysis querying CTCF and Gapdh protein levels in ES cells in serum-LIF media and NPCs. Related to Figure 1.
