# Supplementary material for: YY1 and CTCF orchestrate a 3D chromatin looping switch during early neural lineage commitment
Source: PubMed Central journal article supplement — Genome Res. 2017 Jul;27(7):1139–52. doi: 10.1101/gr.215160.116 (PMC5495066; doi:10.1101/gr.215160.116), 2017-07
Supplement: supp_gr.215160.116_Supplemental_Fig_S2.pdf [file supp_gr.215160.116_Supplemental_Fig_S2.pdf]

**A**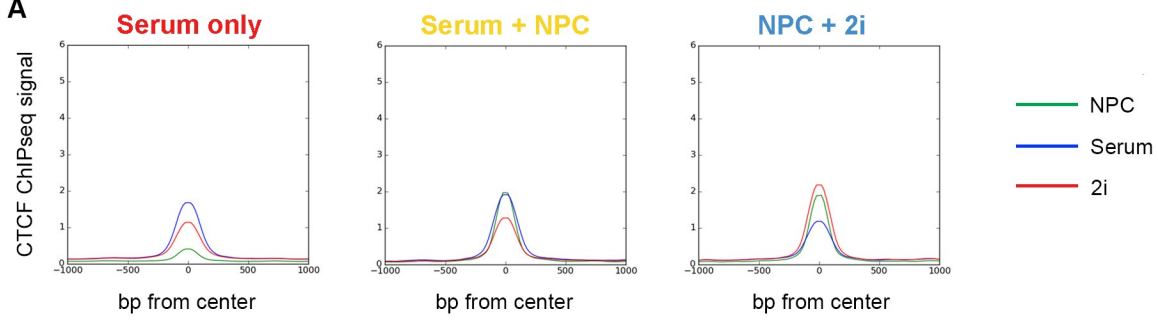

**Supplemental Figure S2. CTCF binding strength in additional CTCF occupancy classes.**

**(A)** CTCF ChIPseq signal in NPCs (green), ES serum (red) and ES 2i (blue) centered at parsed CTCF peaks (serum only, serum+NPC and 2i+NPC occupancy classes).
