# Supplementary material for: YY1 and CTCF orchestrate a 3D chromatin looping switch during early neural lineage commitment
Source: PubMed Central journal article supplement — Genome Res. 2017 Jul;27(7):1139–52. doi: 10.1101/gr.215160.116 (PMC5495066; doi:10.1101/gr.215160.116), 2017-07
Supplement: supp_gr.215160.116_Supplemental_Fig_S3.pdf [file supp_gr.215160.116_Supplemental_Fig_S3.pdf]

**A**

Interaction Frequency

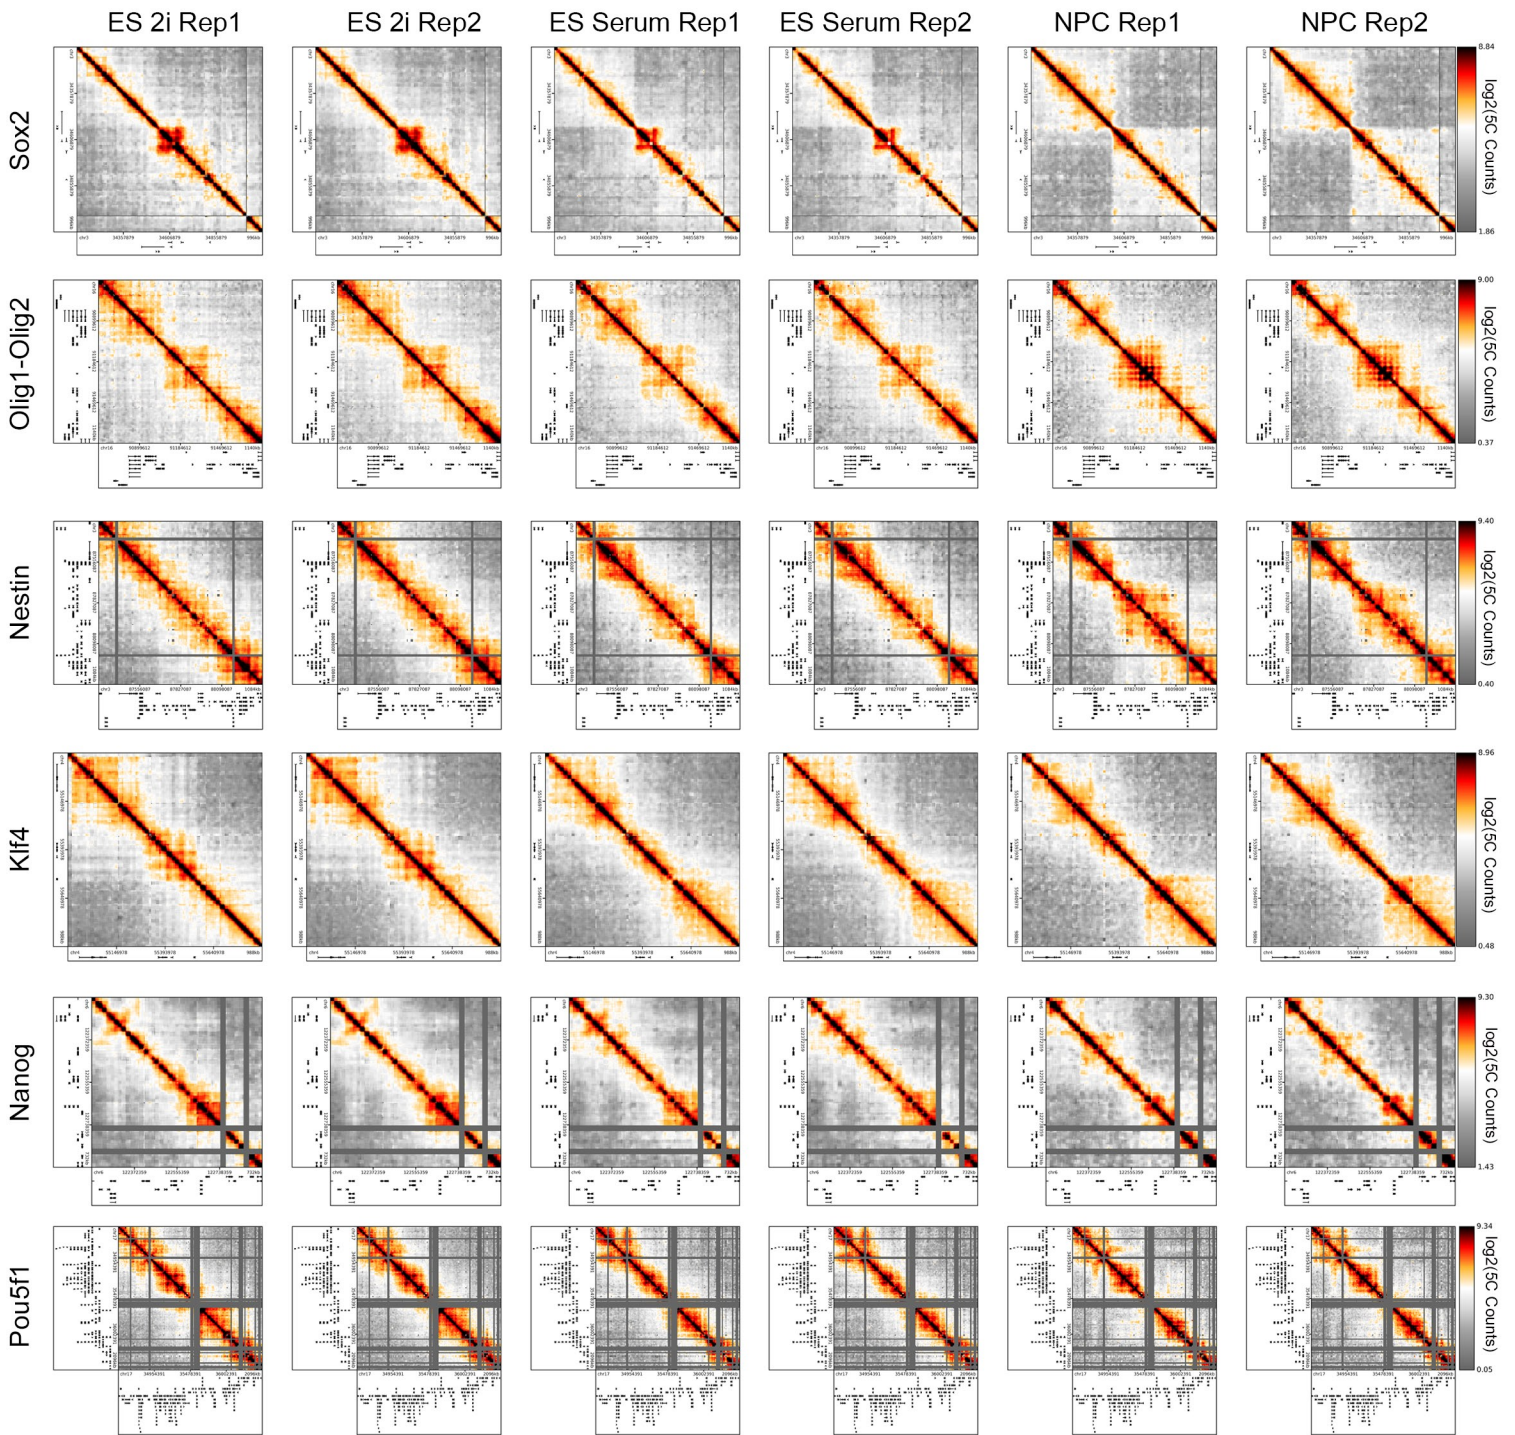**B**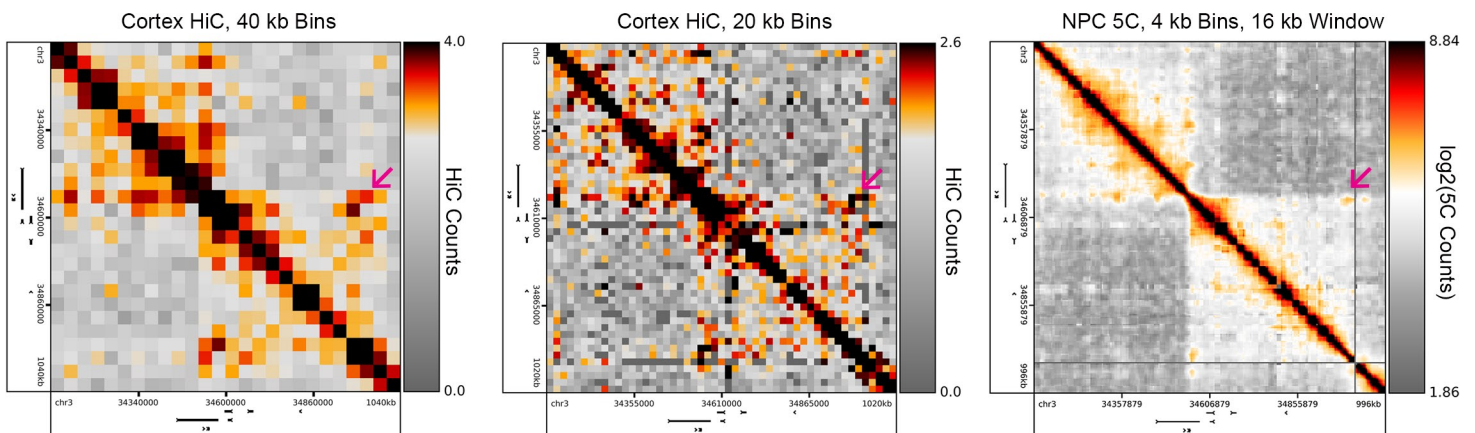

**Supplemental Figure S3. Relative interaction frequency heatmaps at key developmental loci. (A)** Relative interaction frequency heatmaps of 1 Mb surrounding several developmental genes (rows; *Sox2*, *Olig1-Olig2*, *Nes*, *Klf4*, *Nanog*, *Pou5f1*) in replicates of ES 2i, ES serum and NPCs (columns). **(B)** Comparison of mouse cortex HiC heatmaps at 40 kb (left) and 20 kb bins (middle) with our 4 kb binned pNPC 5C heatmaps in a 1 Mb region surrounding the *Sox2* gene. HiC data from (Dixon et al. 2012). Related to Figure 3.
