# Supplementary material for: YY1 and CTCF orchestrate a 3D chromatin looping switch during early neural lineage commitment
Source: PubMed Central journal article supplement — Genome Res. 2017 Jul;27(7):1139–52. doi: 10.1101/gr.215160.116 (PMC5495066; doi:10.1101/gr.215160.116), 2017-07
Supplement: supp_gr.215160.116_Supplemental_Fig_S6.pdf [file supp_gr.215160.116_Supplemental_Fig_S6.pdf]

**A**

Max Background

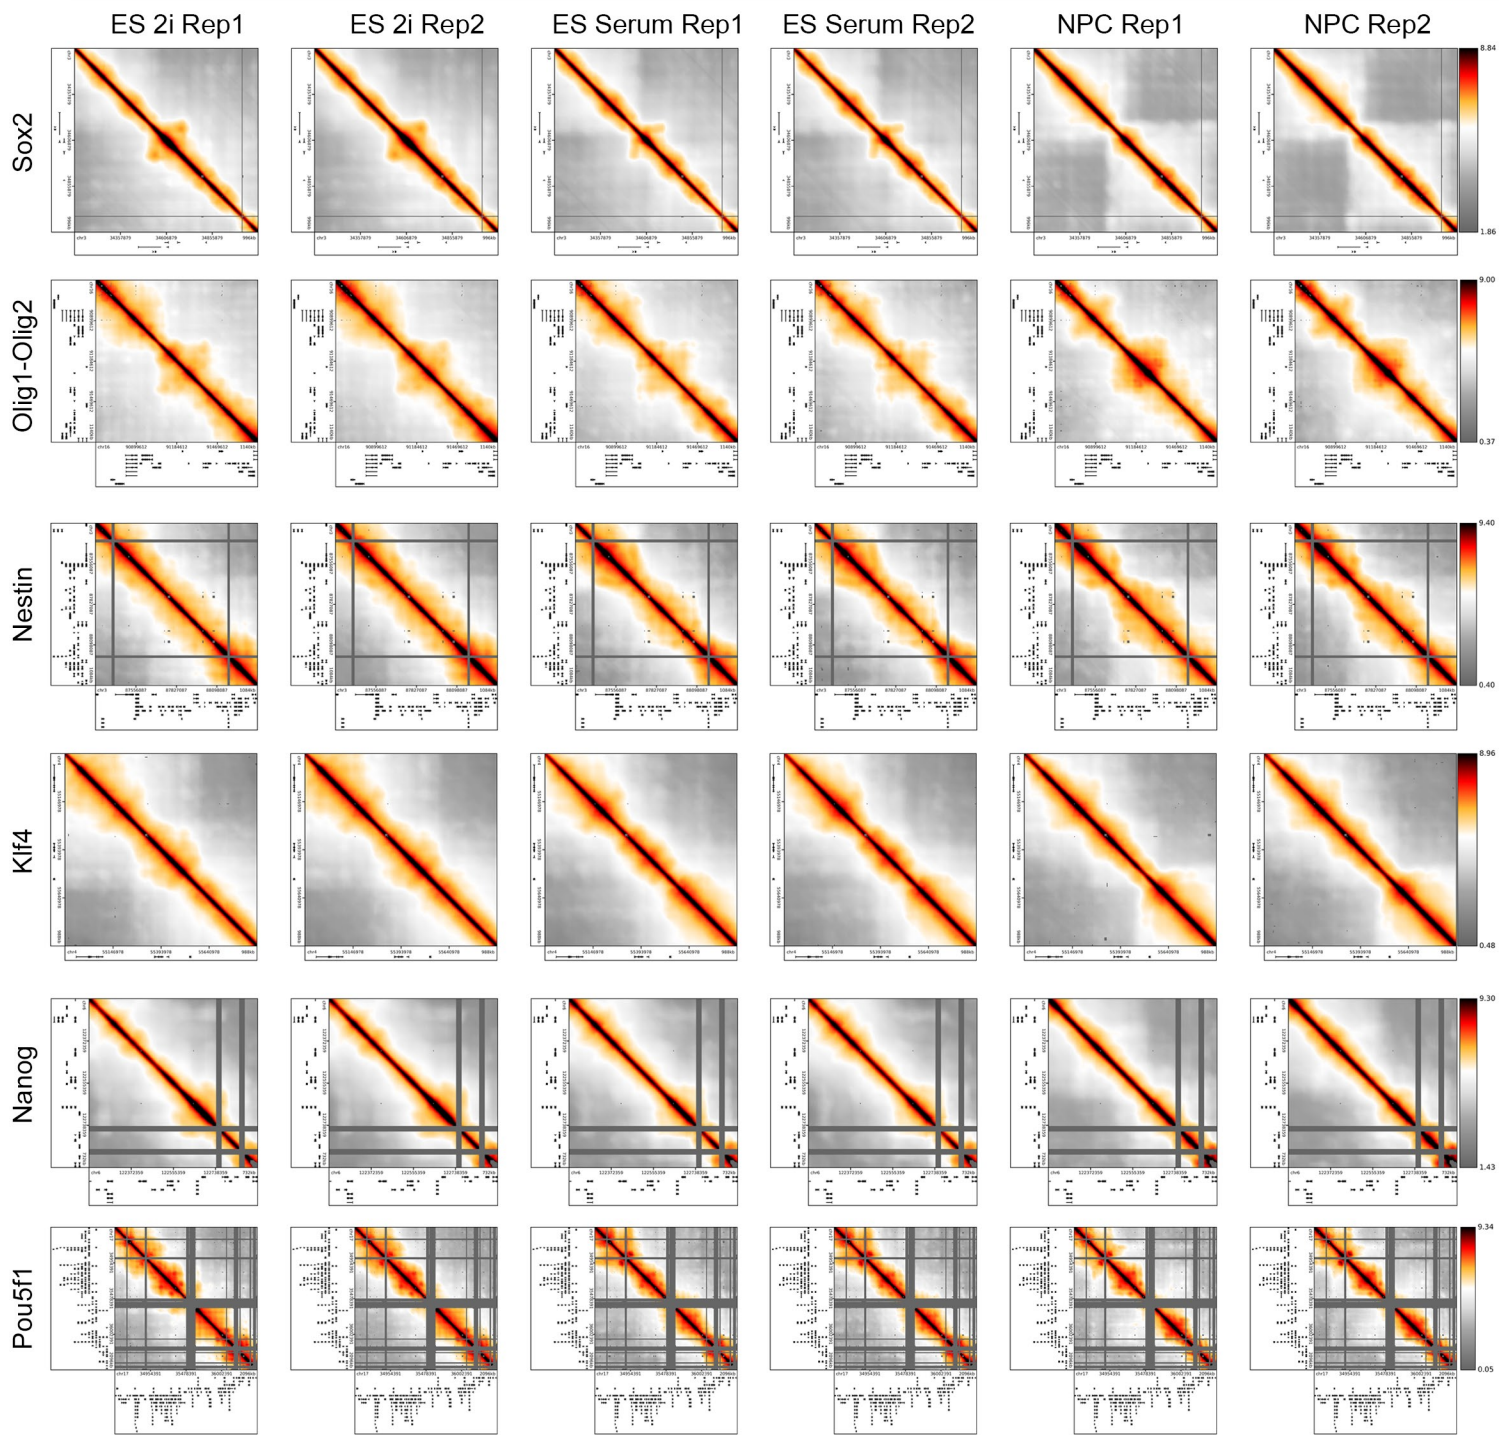

**Supplemental Figure S6. Max(donut, lower left) expected background model heatmaps at key developmental loci. (A)** Max(Donut, Lower Left) expected background model heatmaps of 1-2 Mb surrounding several developmental genes (rows; *Sox2*, *Olig1-Olig2*, *Nes*, *Klf4*, *Nanog*, *Pou5f1*) in replicates of ES 2i, ES serum and NPCs (columns). Related to Figure 3.
