# Supplementary material for: YY1 and CTCF orchestrate a 3D chromatin looping switch during early neural lineage commitment
Source: PubMed Central journal article supplement — Genome Res. 2017 Jul;27(7):1139–52. doi: 10.1101/gr.215160.116 (PMC5495066; doi:10.1101/gr.215160.116), 2017-07
Supplement: supp_gr.215160.116_Supplemental_Fig_S7.pdf [file supp_gr.215160.116_Supplemental_Fig_S7.pdf]

**A**

## Distance Corrected 5C Counts Logistic Fits

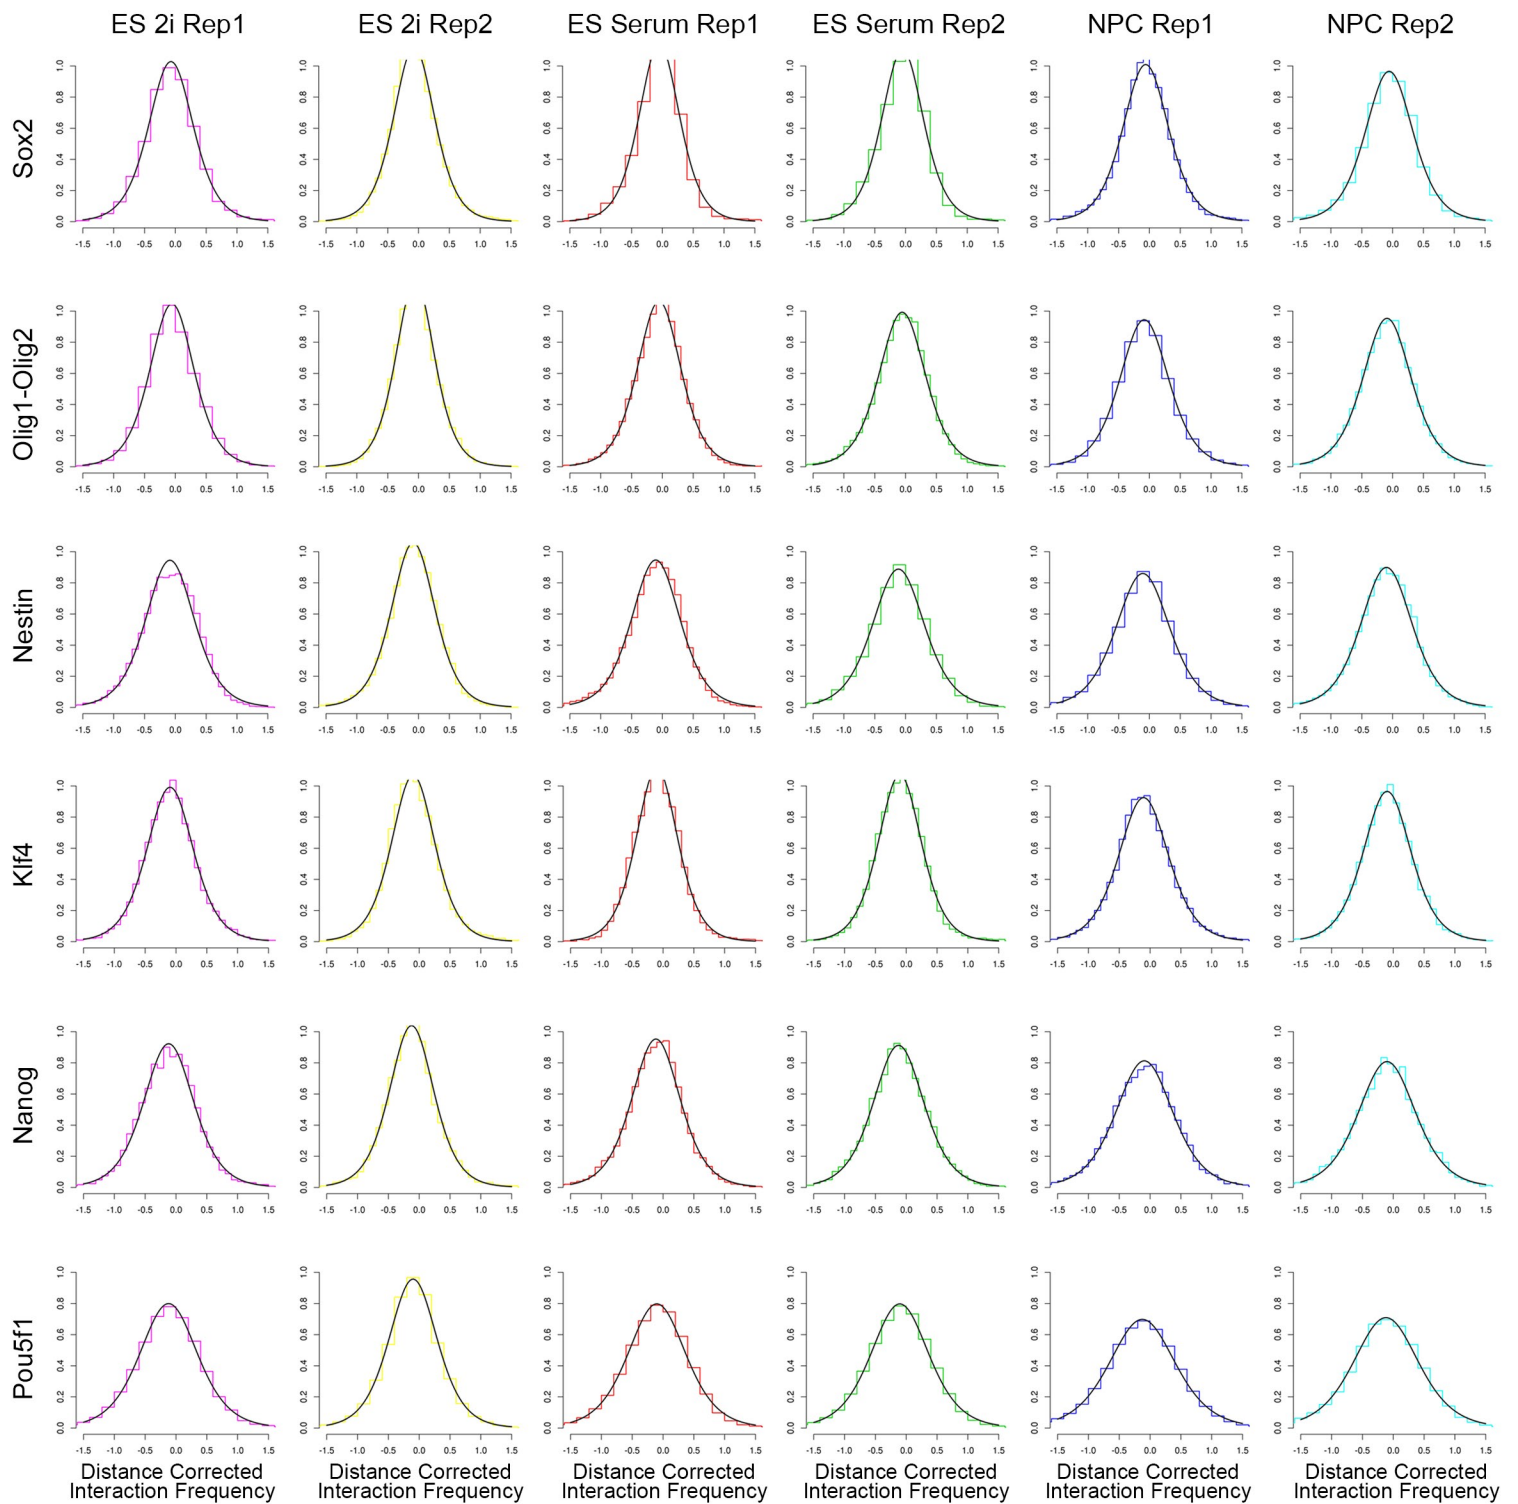

**Supplemental Figure S7. Distance-corrected 5C counts fit with the logistic distribution.**

**(A)** Histograms of distance corrected 5C counts overlaid by logistic distributions fit independently for each region and replicate. Related to Figure 3.
