# Supplementary material for: YY1 and CTCF orchestrate a 3D chromatin looping switch during early neural lineage commitment
Source: PubMed Central journal article supplement — Genome Res. 2017 Jul;27(7):1139–52. doi: 10.1101/gr.215160.116 (PMC5495066; doi:10.1101/gr.215160.116), 2017-07
Supplement: supp_gr.215160.116_Supplemental_Fig_S9.pdf [file supp_gr.215160.116_Supplemental_Fig_S9.pdf]

**A**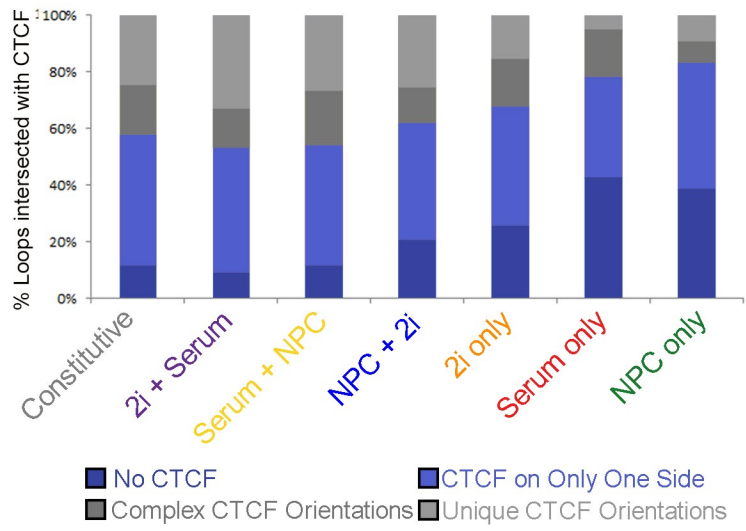**B**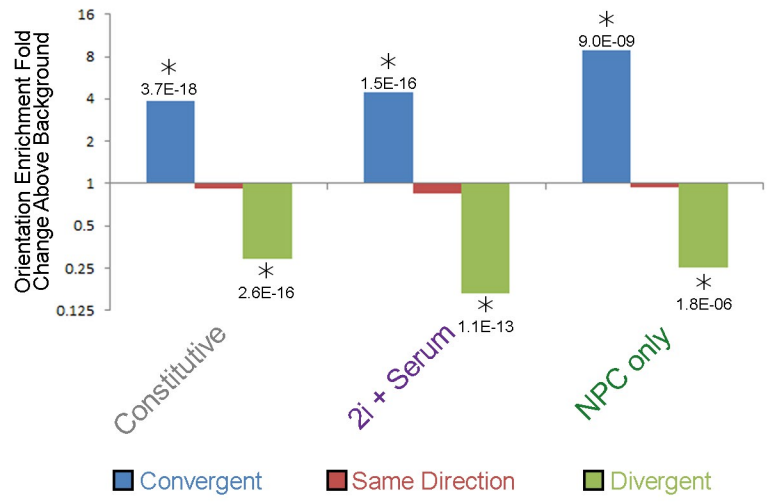

**Supplemental Figure S9. CTCF anchoring classified interactions are preferentially oriented in a 'convergent' manner. (A)** Stacked barplot characterizing the presence of CTCF in each looping class. Classifications were: no CTCF in loop (dark blue), CTCF found on only 1 side of the looping interaction (light blue), complex CTCF orientations such as conflicting CTCF orientations at the same peak or on the same side of a loop (dark grey) and unique CTCF orientations anchoring both sides of each loop (light grey). **(B)** Fold change enrichment of pairs CTCF motifs in specific orientations across the two sides of interactions present in constitutive, Serum+2i, and NPC-only loops compared to background levels. P-values calculated using Fisher's exact test. Related to Figures 3-4.
