# Supplementary material for: YY1 and CTCF orchestrate a 3D chromatin looping switch during early neural lineage commitment
Source: PubMed Central journal article supplement — Genome Res. 2017 Jul;27(7):1139–52. doi: 10.1101/gr.215160.116 (PMC5495066; doi:10.1101/gr.215160.116), 2017-07
Supplement: supp_gr.215160.116_Supplemental_Fig_S10.pdf [file supp_gr.215160.116_Supplemental_Fig_S10.pdf]

**A****Sox2**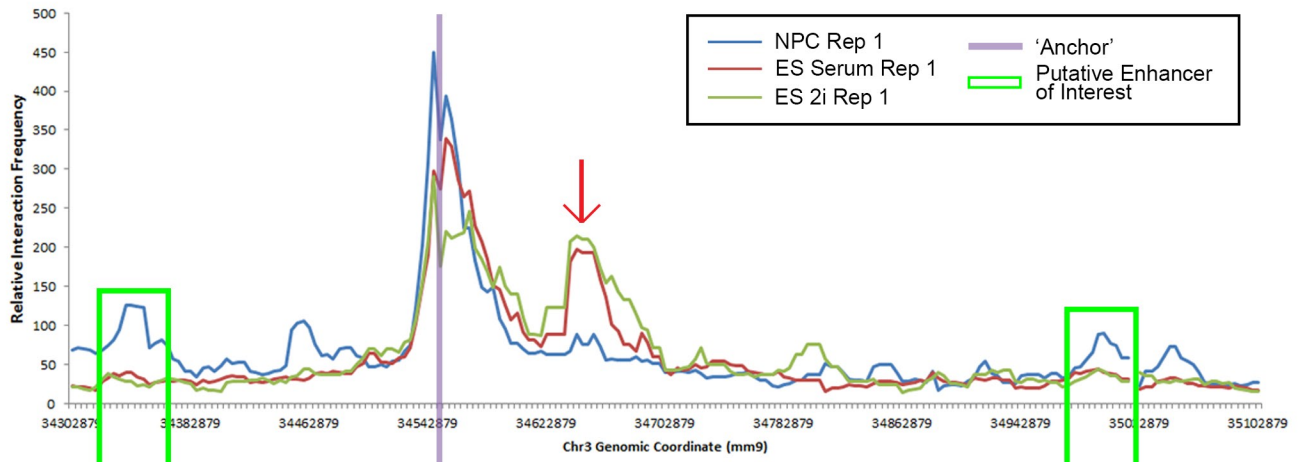**B**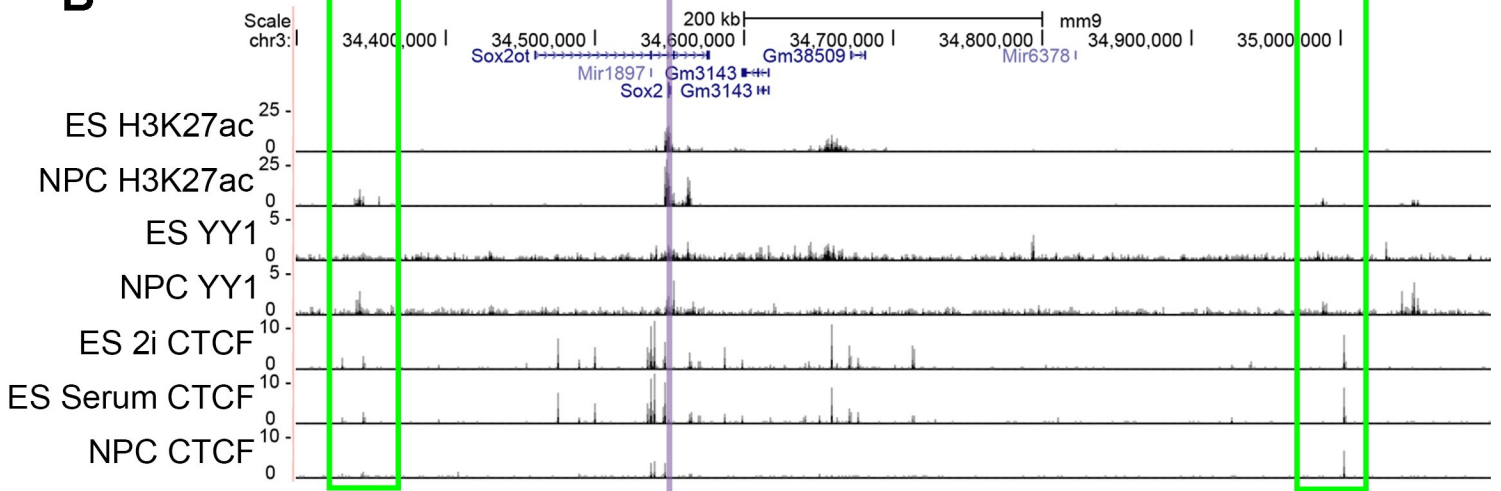

**Supplemental Figure S10. Summary of crucial interactions made by the Sox2 gene. (A)**

Relative interaction frequencies for the interactions between the 5C bin containing the Sox2 gene (highlighted in purple) and surrounding bins are plotted for the first ES 2i, ES Serum, and NPC replicates. Putative enhancer elements of interest are highlighted in green box(es). **(B)** UCSC genome browser tracks are displayed for the same locus as in (A), displaying the H3K27ac, YY1, and CTCF CHIP-seq data utilized in this study.
