# Supplementary material for: YY1 and CTCF orchestrate a 3D chromatin looping switch during early neural lineage commitment
Source: PubMed Central journal article supplement — Genome Res. 2017 Jul;27(7):1139–52. doi: 10.1101/gr.215160.116 (PMC5495066; doi:10.1101/gr.215160.116), 2017-07
Supplement: supp_gr.215160.116_Supplemental_Fig_S14.pdf [file supp_gr.215160.116_Supplemental_Fig_S14.pdf]

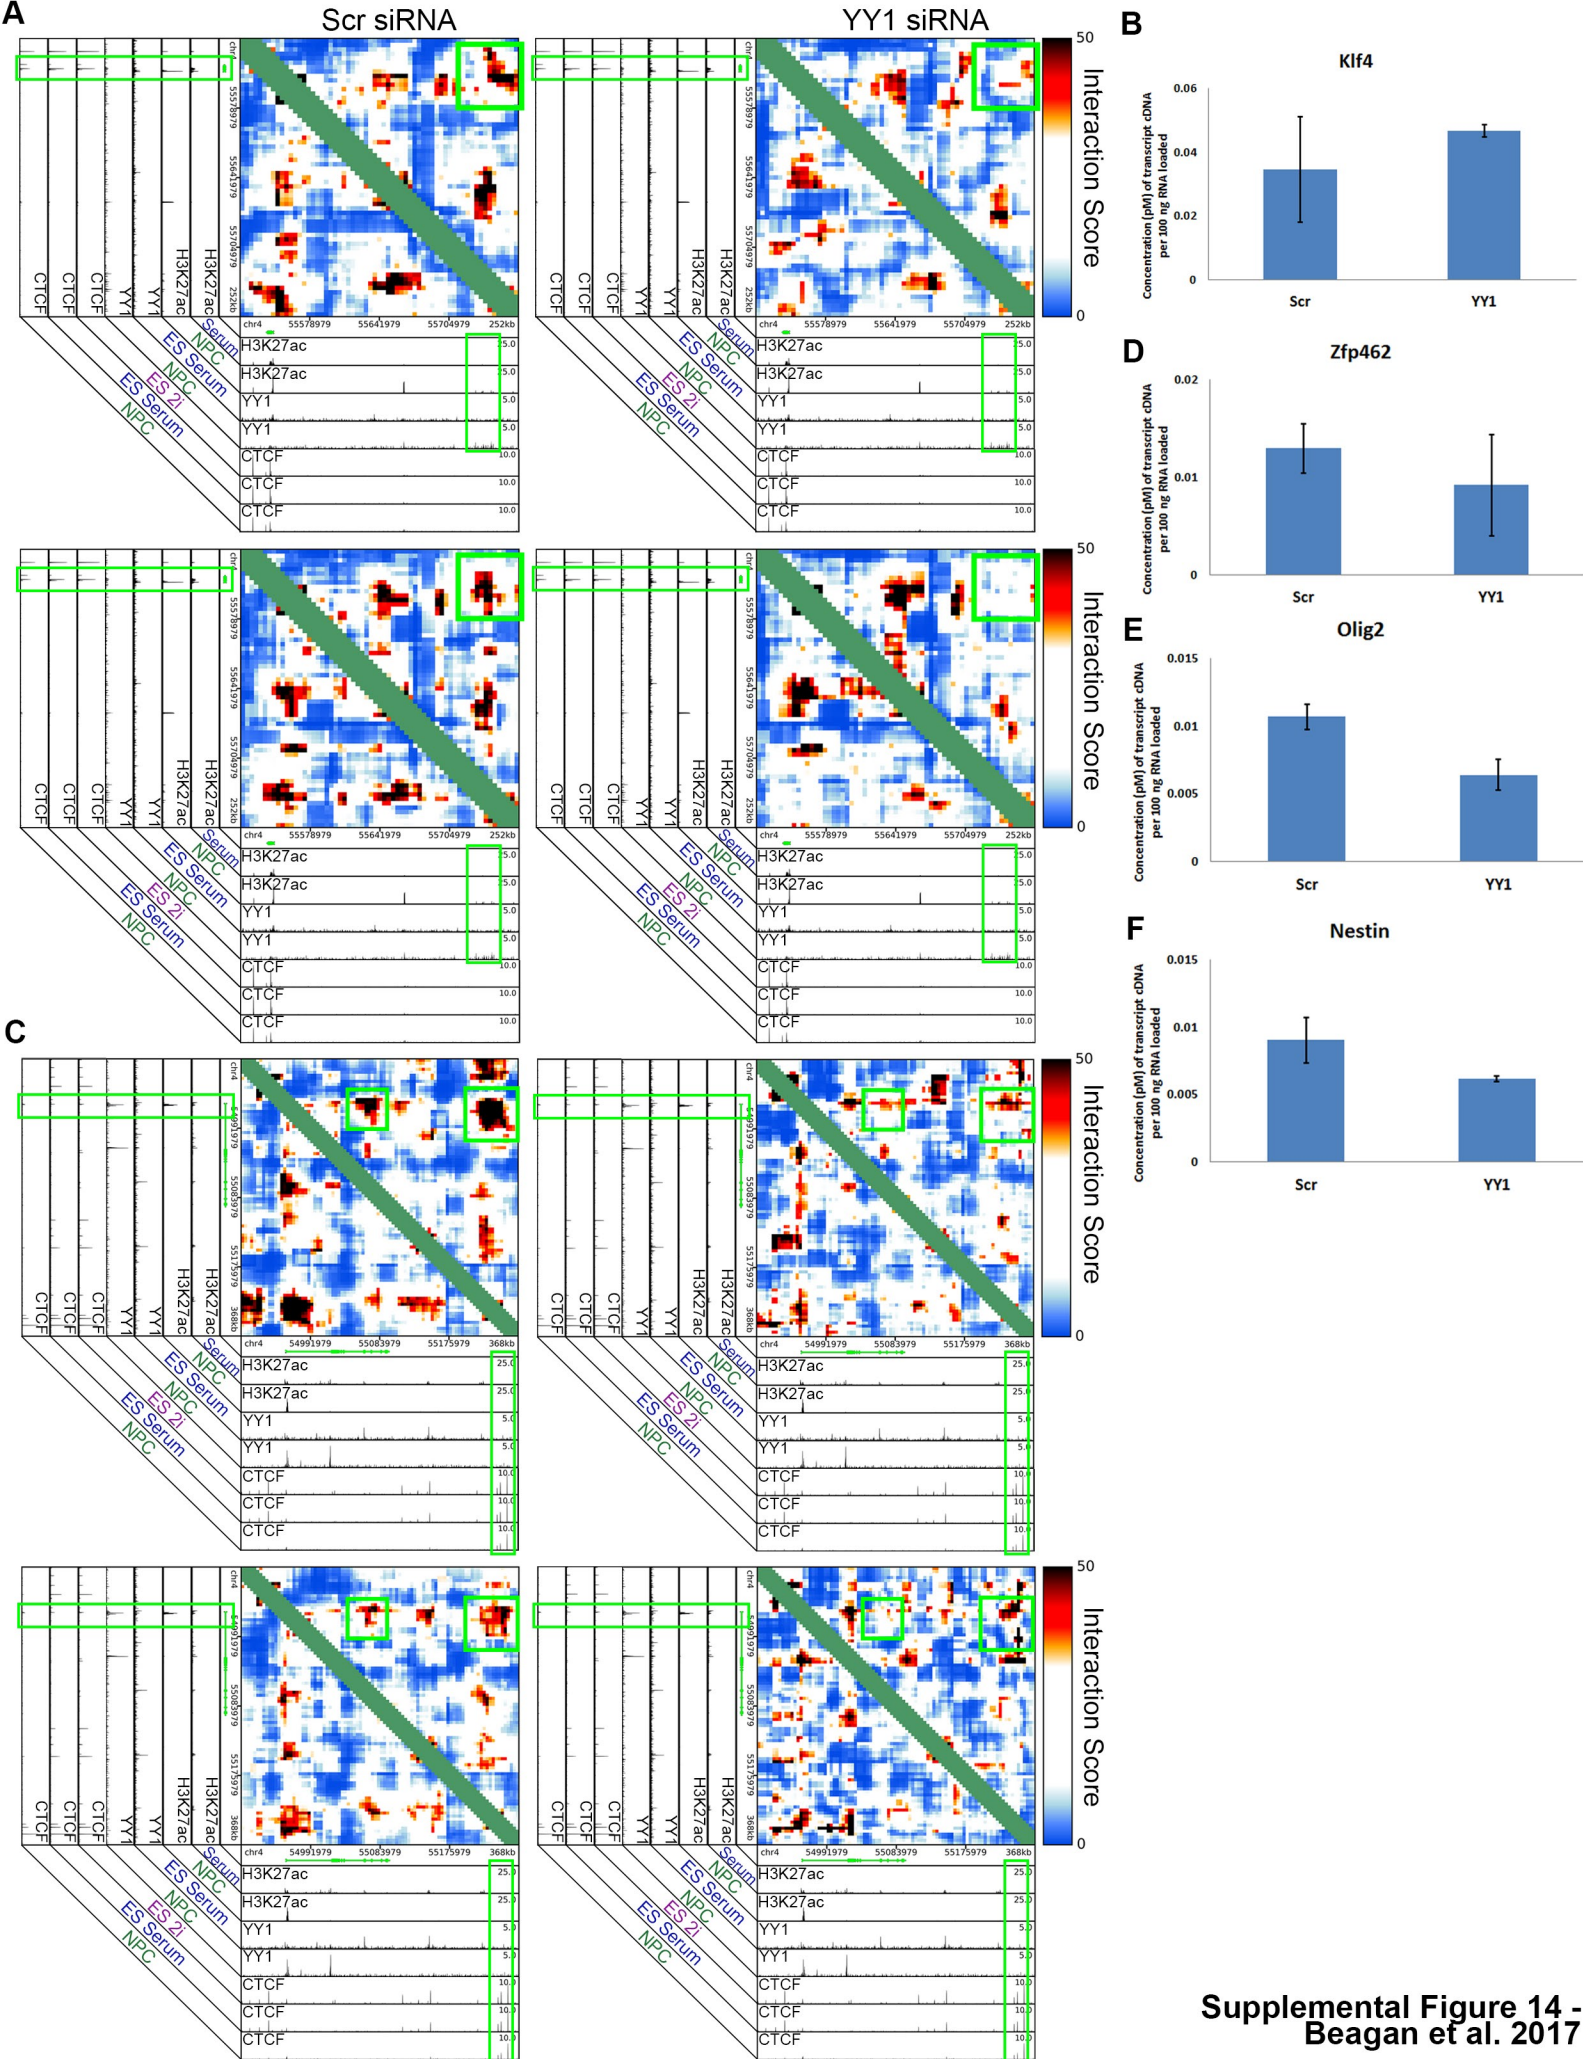

Supplemental Figure 14 - Beagan et al. 2017

**Supplemental Figure S14. 3D looping interactions at the *Klf4* and *Zfp462* loci are disrupted upon YY1 knockdown. (A)** Zoom-in interaction score heatmaps of a loop between the *Klf4* gene and downstream enhancer(s) in NPCs exposed to non-targeting control siRNA (left) and an siRNA targeting YY1 (right). **(B)** Gene-expression quantified by qPCR of the *Klf4* gene in NPCs exposed to non-targeting and YY1-targeting siRNA. **(C)** Zoom-in interaction score heatmaps of a loop between the *Zfp462* gene and downstream enhancer(s) in NPCs exposed to non-targeting control siRNA (left) and an siRNA targeting YY1 (right). **(D-F)** Gene-expression quantified by qPCR of the *Zfp462* (D), *Olig2* (E), and *Nestin* (F) genes in NPCs exposed to non-targeting and YY1-targeting siRNA.
