# Supplementary material for: YY1 and CTCF orchestrate a 3D chromatin looping switch during early neural lineage commitment
Source: PubMed Central journal article supplement — Genome Res. 2017 Jul;27(7):1139–52. doi: 10.1101/gr.215160.116 (PMC5495066; doi:10.1101/gr.215160.116), 2017-07
Supplement: supp_gr.215160.116_Supplemental_Fig_S16.pdf [file supp_gr.215160.116_Supplemental_Fig_S16.pdf]

**A****Homodimerization**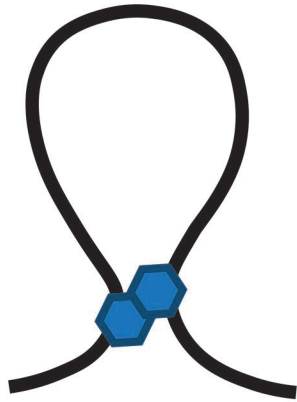**B****Heterodimerization**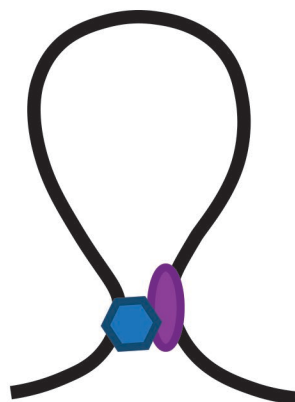**C****Loop Extrusion**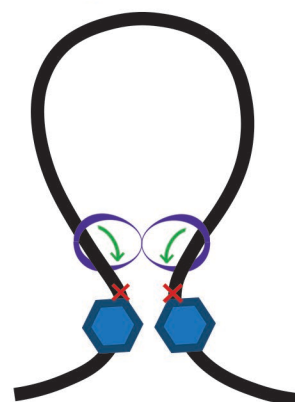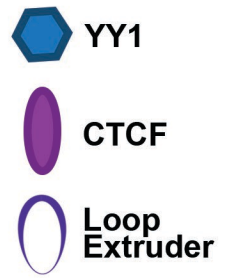

**Supplemental Figure S16. Hypothesized models of YY1-mediated looping.** Future studies will be needed to elucidate the mechanism by which YY1 mediates chromatin looping. We propose three possibilities, although there are surely more: **(A)** homodimerization between YY1 binding on both sides of the loop, **(B)** heterodimerization between YY1 and another protein (perhaps CTCF) and **(C)** YY1 serving as a loop extrusion barrier.
