# Supplementary material for: YY1 and CTCF orchestrate a 3D chromatin looping switch during early neural lineage commitment
Source: PubMed Central journal article supplement — Genome Res. 2017 Jul;27(7):1139–52. doi: 10.1101/gr.215160.116 (PMC5495066; doi:10.1101/gr.215160.116), 2017-07
Supplement: supp_gr.215160.116_Supplemental_Tables.pdf [file supp_gr.215160.116_Supplemental_Tables.pdf]

**Supplemental Tables**

**Table S1, Spearman's Rank Order Correlation Coefficients between the Relative Interaction Frequencies of each 5C Replicate**

|            |            |            |            |            |            |        |
|------------|------------|------------|------------|------------|------------|--------|
| ES 2i 1    |            |            |            |            |            |        |
| ES 2i 2    | 0.96697874 |            |            |            |            |        |
| ES Serum 1 | 0.90833291 | 0.93463038 |            |            |            |        |
| ES Serum 2 | 0.90105915 | 0.92885156 | 0.96734117 |            |            |        |
| pNPC 1     | 0.88150638 | 0.89151858 | 0.87489302 | 0.86904787 |            |        |
| pNPC 2     | 0.88047355 | 0.89716557 | 0.88978209 | 0.88753915 | 0.93984855 |        |
|            | ES 2i 1    | ES 2i 2    | ES Serum 1 | ES Serum 2 | pNPC 1     | pNPC 2 |

**Table S2: Summary of new CHIP-seq datasets provided in this study**

| Target Protein | Cell Type                     | Total Mapped Test ChIP-Seq reads | Number non-redundant tags utilized (after down-sampling) | Control Samples                            | Total Mapped Control ChIP-Seq reads | Number non-redundant tags utilized (after down-sampling) |
|----------------|-------------------------------|----------------------------------|----------------------------------------------------------|--------------------------------------------|-------------------------------------|----------------------------------------------------------|
| CTCF           | mES (V6.5) in 2i/LIF media    | 37958347                         | 11000000                                                 | mES (V6.5) in 2i/LIF whole cell extract    | 41629078                            | 15000000                                                 |
| CTCF           | mES (V6.5) in serum/LIF media | 48653104                         | 11000000                                                 | mES (V6.5) in serum/LIF whole cell extract | 29243502                            | 15000000                                                 |
| CTCF           | Primary NPCs                  | 67490709                         | 11000000                                                 | Primary NPCs whole cell extract            | 41249127                            | 15000000                                                 |

**Table S3: Summary of new 5C datasets provided in this study**

| Condition | Cell Type | 5C/ Sequencing Run* | Total Mapped Reads (Paired end 1) | Total Mapped Reads (Paired end 2) | 5C/ Sequencing Run* | Total Mapped Reads (Paired end 1) | Total Mapped Reads (Paired end 2) |
|-----------|-----------|---------------------|-----------------------------------|-----------------------------------|---------------------|-----------------------------------|-----------------------------------|
|-----------|-----------|---------------------|-----------------------------------|-----------------------------------|---------------------|-----------------------------------|-----------------------------------|

|                      |              |   |          |          |   |          |          |
|----------------------|--------------|---|----------|----------|---|----------|----------|
| Scramble siRNA Rep 1 | Primary NPCs | 1 | 15564299 | 15493210 | 2 | 17519692 | 17451775 |
| Scramble siRNA Rep 2 | Primary NPCs | 1 | 9893122  | 9840016  | 2 | 22108742 | 21989501 |
| YY1 siRNA Rep 1      | Primary NPCs | 1 | 12062591 | 12019219 | 2 | 19736186 | 19631975 |
| YY1 siRNA Rep 2      | Primary NPCs | 1 | 12191408 | 12143821 | 2 | 49818851 | 49599774 |

\* Footnote: Runs were subsequently merged for analysis.

**Table S4: Summary of publically available ChIP-seq datasets analyzed**

| Target Protein | Cell Type                         | Mapped Test ChIP-Seq reads (after down-sampling) | Test ChIP Reference      | Test Sample GEO ID | Control Samples         | Mapped Control ChIP-Seq reads (after down-sampling) | Control Sample GEO ID |
|----------------|-----------------------------------|--------------------------------------------------|--------------------------|--------------------|-------------------------|-----------------------------------------------------|-----------------------|
| YY1            | mES Cells                         | 7200000                                          | (Sigova et al. 2015)     | GSM1665555         | Whole Cell Extract      | 7700000                                             | GSM1665554            |
| YY1            | ES-derived NPC                    | 7200000                                          | (Mendenhall et al. 2010) | GSM628032          | NPC Whole Cell Extract  | 7700000                                             | GSM883648             |
| YY1            | ProB Cells (Rag2 <sup>-/-</sup> ) | 7200000                                          | (Medvedovic et al. 2013) | GSM1145864         | ProB Input              | 7700000                                             | GSM1145867            |
| H3K27ac        | mES (V6.5)                        | 7000000                                          | (Creyghton et al. 2010)  | GSM594579 Rep2     | V6.5 Whole Cell Extract | 7000000                                             | GSM594599             |
| H3K27ac        | ES-derived NPC                    | 7000000                                          | (Creyghton et al. 2010)  | GSM594585          | NPC Whole Cell Extract  | 7000000                                             | GSM883648             |

**Table S5: Significant CTCF Peaks in ES cells in 2i Conditions**

Provided in separate spreadsheet.

**Table S6: Significant CTCF Peaks in ES cells in Serum Conditions**

Provided in separate spreadsheet.

**Table S7: Significant CTCF Peaks in NPCs**

Provided in separate spreadsheet.

**Table S8: Significant CTCF Peaks present only in the 2i condition (classified as '2i only')**

Provided in separate spreadsheet.

**Table S9: Significant CTCF Peaks present only in the NPC condition (classified as 'NPC only')**

Provided in separate spreadsheet.

**Table S10: Significant CTCF Peaks present in the ES 2i and ES serum cellular states (classified as '2i + serum')**

Provided in separate spreadsheet.

**Table S11: Significant CTCF Peaks present in the ES 2i, ES serum, and NPC cellular states (classified as 'constitutive')**

Provided in separate spreadsheet.

**Table S12: Significant YY1 Peaks in NPCs**

Provided in separate spreadsheet.

**Table S13: Significant YY1 Peaks in ES cells in Serum**

Provided in separate spreadsheet.

**Table S14: ES Enhancer Annotations**

Provided in separate spreadsheet.

**Table S15: NPC Enhancer Annotations**

Provided in separate spreadsheet.

**Table S16: ES Gene Annotations**

Provided in separate spreadsheet.

**Table S17: NPC Gene Annotations**

Provided in separate spreadsheet.

**Table S18: Constitutive Gene Annotations**

Provided in separate spreadsheet.
