# Supplementary material for: YY1 and CTCF orchestrate a 3D chromatin looping switch during early neural lineage commitment
Source: HighWire-hosted journal article supplement (doi:10.1101/gr.215160.116), 2017-05-23
Supplement: Supplemental_custom_scripts_5C_analysis.zip [file 12_1_YY1_KD_Exp6_JB_YY1_aTub_2_6_17_analysis.xls]

## Sheet: Results
Block Type	96well
Chemistry	SYBR_GREEN
Experiment File Name	D:\Applied Biosystems\StepOne Software v2.3\experiments\JB\12_1_YY1_KD_Exp6_JB_YY1_aTub.eds
Experiment Run End Time	Not Started
Instrument Type	steponeplus
Passive Reference
Well	Sample Name	Target Name	Task	Reporter	Quencher	Cт	Cт Mean	Cт SD	Quantity	Quantity Mean	Quantity SD	Automatic Ct Threshold	Ct Threshold	Automatic Baseline	Baseline Start	Baseline End	Tm1	Tm2	Tm3	Comments	HIGHSD	EXPFAIL
A1		YY1 P1	STANDARD	SYBR	None	9.84077			10			FALSE	20000	TRUE	1	2	63.247				N	N
A2		YY1 P1	STANDARD	SYBR	None	9.69081			10			FALSE	20000	TRUE	1	2	60.395				N	N
A3		YY1 P1	STANDARD	SYBR	None	9.98398			10			FALSE	20000	TRUE	1	2	62.5002				N	N
A4		a-Tub	STANDARD	SYBR	None	23.5252			10			FALSE	20000	TRUE	3	12	62.6514				Y	N
A5		a-Tub	STANDARD	SYBR	None	22.6919			10			FALSE	20000	TRUE	3	9	63.0911				Y	N
A6		a-Tub	STANDARD	SYBR	None	21.4688			10			FALSE	20000	TRUE	1	2	62.9391				Y	N
A7	48 Hr Scr KD 1	YY1 P1	UNKNOWN	SYBR	None	24.4434						FALSE	20000	TRUE	3	14	63.097				N	N
A8	48 Hr Scr KD 1	YY1 P1	UNKNOWN	SYBR	None	24.458						FALSE	20000	TRUE	3	16	61.7393				N	N
A9	78 Hr Scr 1	YY1 P1	UNKNOWN	SYBR	None	24.0736						FALSE	20000	TRUE	3	14	61.8983				N	N
A10	78 Hr Scr 1	YY1 P1	UNKNOWN	SYBR	None	24.1499						FALSE	20000	TRUE	3	15	62.6554				N	N
A11	48 Hr Scr KD 1	a-Tub	UNKNOWN	SYBR	None	26.9587						FALSE	20000	TRUE	3	13	62.051				N	N
A12	48 Hr Scr KD 1	a-Tub	UNKNOWN	SYBR	None	26.2957						FALSE	20000	TRUE	3	17	63.2507				N	N
B1		YY1 P1	STANDARD	SYBR	None	13.0925			1			FALSE	20000	TRUE	1	2	62.9432				N	N
B2		YY1 P1	STANDARD	SYBR	None	13.3574			1			FALSE	20000	TRUE	1	2	62.8011				N	N
B3		YY1 P1	STANDARD	SYBR	None	13.0766			1			FALSE	20000	TRUE	1	2	61.4461				N	N
B4		a-Tub	STANDARD	SYBR	None	30.3851			1			FALSE	20000	TRUE	3	18	63.2428				Y	N
B5		a-Tub	STANDARD	SYBR	None	28.6611			1			FALSE	20000	TRUE	3	14	62.6527				Y	N
B6		a-Tub	STANDARD	SYBR	None	26.7251			1			FALSE	20000	TRUE	3	13	62.9391				Y	N
B7	48 Hr Scr KD 2	YY1 P1	UNKNOWN	SYBR	None	24.4224						FALSE	20000	TRUE	3	13	63.097				N	N
B8	48 Hr Scr KD 2	YY1 P1	UNKNOWN	SYBR	None	24.4556						FALSE	20000	TRUE	3	14	62.0567				N	N
B9	78 Hr Scr 2	YY1 P1	UNKNOWN	SYBR	None	23.9368						FALSE	20000	TRUE	3	13	63.2488				Y	N
B10	78 Hr Scr 2	YY1 P1	UNKNOWN	SYBR	None	24.7587						FALSE	20000	TRUE	3	14	61.1536				Y	N
B11	48 Hr Scr KD 2	a-Tub	UNKNOWN	SYBR	None	27.7915						FALSE	20000	TRUE	3	18	62.8031				Y	N
B12	48 Hr Scr KD 2	a-Tub	UNKNOWN	SYBR	None	26.8522						FALSE	20000	TRUE	3	16	63.2507				Y	N
C1		YY1 P1	STANDARD	SYBR	None	15.9142			0.1			FALSE	20000	TRUE	3	8	63.247				N	N
C2		YY1 P1	STANDARD	SYBR	None	15.7581			0.1			FALSE	20000	TRUE	3	7	63.247				N	N
C3		YY1 P1	STANDARD	SYBR	None	15.8273			0.1			FALSE	20000	TRUE	3	7	63.2428				N	N
C4		a-Tub	STANDARD	SYBR	None	32.871			0.1			FALSE	20000	TRUE	3	18	62.6514				Y	N
C5		a-Tub	STANDARD	SYBR	None	33.9639			0.1			FALSE	20000	TRUE	3	21	63.394				Y	N
C6		a-Tub	STANDARD	SYBR	None	33.7622			0.1			FALSE	20000	TRUE	3	22	62.9391				Y	N
C7	48 Hr Scr 3	YY1 P1	UNKNOWN	SYBR	None	24.3475						FALSE	20000	TRUE	3	14	61.5961				N	N
C8	48 Hr Scr 3	YY1 P1	UNKNOWN	SYBR	None	24.2304						FALSE	20000	TRUE	3	14	62.2055				N	N
C9	78 Hr YY1 1	YY1 P1	UNKNOWN	SYBR	None	Undetermined						FALSE	20000	TRUE	3	39	61.7426				N	Y
C10	78 Hr YY1 1	YY1 P1	UNKNOWN	SYBR	None	25.2917						FALSE	20000	TRUE	3	15	62.505				N	N
C11	48 Hr Scr 3	a-Tub	UNKNOWN	SYBR	None	26.8338						FALSE	20000	TRUE	3	17	62.3568				N	N
C12	48 Hr Scr 3	a-Tub	UNKNOWN	SYBR	None	26.6596						FALSE	20000	TRUE	3	14	63.2507				N	N
D1		YY1 P1	STANDARD	SYBR	None	19.4884			0.01			FALSE	20000	TRUE	3	10	62.3507				N	N
D2		YY1 P1	STANDARD	SYBR	None	19.6152			0.01			FALSE	20000	TRUE	3	10	63.247				N	N
D3		YY1 P1	STANDARD	SYBR	None	19.9039			0.01			FALSE	20000	TRUE	3	8	62.5002				N	N
D4		a-Tub	STANDARD	SYBR	None	35.8877			0.01			FALSE	20000	TRUE	3	26	62.5002				Y	N
D5		a-Tub	STANDARD	SYBR	None	36.4276			0.01			FALSE	20000	TRUE	3	23	63.394				Y	N
D6		a-Tub	STANDARD	SYBR	None	38.2908			0.01			FALSE	20000	TRUE	3	26	62.9391				Y	N
D7	48 Hr YY1 KD 1	YY1 P1	UNKNOWN	SYBR	None	25.7843						FALSE	20000	TRUE	3	14	63.2488				N	N
D8	48 Hr YY1 KD 1	YY1 P1	UNKNOWN	SYBR	None	25.7035						FALSE	20000	TRUE	3	14	62.0567				N	N
D9	78 Hr YY1 2	YY1 P1	UNKNOWN	SYBR	None	25.3165						FALSE	20000	TRUE	3	15	63.2488				N	N
D10	78 Hr YY1 2	YY1 P1	UNKNOWN	SYBR	None	25.1867						FALSE	20000	TRUE	3	13	62.505				N	N
D11	48 Hr YY1 KD 1	a-Tub	UNKNOWN	SYBR	None	27.233						FALSE	20000	TRUE	3	17	62.3568				N	N
D12	48 Hr YY1 KD 1	a-Tub	UNKNOWN	SYBR	None	27.0442						FALSE	20000	TRUE	3	16	63.4021				N	N
E1		YY1 P1	STANDARD	SYBR	None	22.9572			0.001			FALSE	20000	TRUE	3	11	62.3507				N	N
E2		YY1 P1	STANDARD	SYBR	None	22.8175			0.001			FALSE	20000	TRUE	3	12	62.9432				N	N
E3		YY1 P1	STANDARD	SYBR	None	22.9981			0.001			FALSE	20000	TRUE	3	13	63.09				N	N
E4		a-Tub	STANDARD	SYBR	None	37.5488			0.001			FALSE	20000	TRUE	3	30	62.5002				N	N
E5		a-Tub	STANDARD	SYBR	None	37.0694			0.001			FALSE	20000	TRUE	3	25	62.2004				N	N
E6		a-Tub	STANDARD	SYBR	None	37.4676			0.001			FALSE	20000	TRUE	3	24	62.2004				N	N
E7	48 Hr YY1 KD 2	YY1 P1	UNKNOWN	SYBR	None	25.8641						FALSE	20000	TRUE	3	16	62.9452				N	N
E8	48 Hr YY1 KD 2	YY1 P1	UNKNOWN	SYBR	None	25.6611						FALSE	20000	TRUE	3	14	62.0567				N	N
E9	78 Hr Scr 1	a-Tub	UNKNOWN	SYBR	None	27.0217						FALSE	20000	TRUE	3	18	63.2488				N	N
E10	78 Hr Scr 1	a-Tub	UNKNOWN	SYBR	None	26.611						FALSE	20000	TRUE	3	12	62.505				N	N
E11	48 Hr YY1 KD 2	a-Tub	UNKNOWN	SYBR	None	26.9267						FALSE	20000	TRUE	3	12	62.9448				N	N
E12	48 Hr YY1 KD 2	a-Tub	UNKNOWN	SYBR	None	26.3918						FALSE	20000	TRUE	3	13	63.2507				N	N
F1		YY1 P1	STANDARD	SYBR	None	26.4755			0.0001			FALSE	20000	TRUE	3	13	63.247				N	N
F2		YY1 P1	STANDARD	SYBR	None	26.9822			0.0001			FALSE	20000	TRUE	3	17	61.4474				N	N
F3		YY1 P1	STANDARD	SYBR	None	26.5965			0.0001			FALSE	20000	TRUE	3	18	63.2428				N	N
F4		a-Tub	STANDARD	SYBR	None	38.5156			0.0001			FALSE	20000	TRUE	3	30	62.5002				Y	N
F5		a-Tub	STANDARD	SYBR	None	38.5879			0.0001			FALSE	20000	TRUE	3	26	62.6527				Y	N
F6		a-Tub	STANDARD	SYBR	None	37.336			0.0001			FALSE	20000	TRUE	3	26	63.394				Y	N
F7	48 Hr YY1 3	YY1 P1	UNKNOWN	SYBR	None	25.2754						FALSE	20000	TRUE	3	14	63.3993				N	N
F8	48 Hr YY1 3	YY1 P1	UNKNOWN	SYBR	None	25.4304						FALSE	20000	TRUE	3	14	62.0567				N	N
F9	78 Hr Scr 2	a-Tub	UNKNOWN	SYBR	None	26.7846						FALSE	20000	TRUE	3	12	63.3998				N	N
F10	78 Hr Scr 2	a-Tub	UNKNOWN	SYBR	None	26.8046						FALSE	20000	TRUE	3	16	62.505				N	N
F11	48 Hr YY1 3	a-Tub	UNKNOWN	SYBR	None	27.4004						FALSE	20000	TRUE	3	16	63.0978				N	N
F12	48 Hr YY1 3	a-Tub	UNKNOWN	SYBR	None	27.0233						FALSE	20000	TRUE	3	16	63.2507				N	N
G1		YY1 P1	STANDARD	SYBR	None	28.1346			1e-05			FALSE	20000	TRUE	3	17	60.395				Y	N
G2		YY1 P1	STANDARD	SYBR	None	27.8104			1e-05			FALSE	20000	TRUE	3	14	63.247				Y	N
G3		YY1 P1	STANDARD	SYBR	None	30.0264			1e-05			FALSE	20000	TRUE	3	19	62.6514				Y	N
G4		a-Tub	STANDARD	SYBR	None	38.8979			1e-05			FALSE	20000	TRUE	3	31	60.7013				Y	N
G5		a-Tub	STANDARD	SYBR	None	37.8988			1e-05			FALSE	20000	TRUE	3	27	63.394				Y	N
G6		a-Tub	STANDARD	SYBR	None	38.6633			1e-05			FALSE	20000	TRUE	3	26	62.9391				Y	N
G7																					N	N
G8																					N	N
G9	78 Hr YY1 1	a-Tub	UNKNOWN	SYBR	None	26.8845						FALSE	20000	TRUE	3	15	63.3998				N	N
G10	78 Hr YY1 1	a-Tub	UNKNOWN	SYBR	None	26.9795						FALSE	20000	TRUE	3	17	62.505				N	N
G11																					N	N
G12																					N	N
H1		YY1 P1	NTC	SYBR	None	Undetermined						FALSE	20000	TRUE	3	37	62.2029				N	N
H2		YY1 P1	NTC	SYBR	None	Undetermined						FALSE	20000	TRUE	3	21	62.9432				N	N
H3		YY1 P1	NTC	SYBR	None	Undetermined						FALSE	20000	TRUE	3	24	60.8438				N	N
H4		a-Tub	NTC	SYBR	None	37.9777						FALSE	20000	TRUE	3	29	63.2428				N	N
H5		a-Tub	NTC	SYBR	None	38.05						FALSE	20000	TRUE	3	25	62.6527				N	N
H6		a-Tub	NTC	SYBR	None	Undetermined						FALSE	20000	TRUE	3	30	62.2004				N	N
H7																					N	N
H8																					N	N
H9	78 Hr YY1 2	a-Tub	UNKNOWN	SYBR	None	26.938						FALSE	20000	TRUE	3	18	63.2488				N	N
H10	78 Hr YY1 2	a-Tub	UNKNOWN	SYBR	None	26.9991						FALSE	20000	TRUE	3	14	62.6554				N	N
H11																					N	N
H12																					N	N

## Sheet: YY1 Std
										Starting Quantity (pM)	log2(pM)
A1		YY1 P1	STANDARD	SYBR	None	9.84077			10	200	7.64386	FALSE	20000	TRUE	1	2	63.247				N	N
A2		YY1 P1	STANDARD	SYBR	None	9.69081			10	200	7.64386	FALSE	20000	TRUE	1	2	60.395				N	N
A3		YY1 P1	STANDARD	SYBR	None	9.98398			10	200	7.64386	FALSE	20000	TRUE	1	2	62.5002				N	N
B1		YY1 P1	STANDARD	SYBR	None	13.0925			1	20	4.32193	FALSE	20000	TRUE	1	2	62.9432				N	N
B2		YY1 P1	STANDARD	SYBR	None	13.3574			1	20	4.32193	FALSE	20000	TRUE	1	2	62.8011				N	N
B3		YY1 P1	STANDARD	SYBR	None	13.0766			1	20	4.32193	FALSE	20000	TRUE	1	2	61.4461				N	N
C1		YY1 P1	STANDARD	SYBR	None	15.9142			0.1	2	1	FALSE	20000	TRUE	3	8	63.247				N	N
C2		YY1 P1	STANDARD	SYBR	None	15.7581			0.1	2	1	FALSE	20000	TRUE	3	7	63.247				N	N
C3		YY1 P1	STANDARD	SYBR	None	15.8273			0.1	2	1	FALSE	20000	TRUE	3	7	63.2428				N	N
D1		YY1 P1	STANDARD	SYBR	None	19.4884			0.01	0.2	-2.32193	FALSE	20000	TRUE	3	10	62.3507				N	N
D2		YY1 P1	STANDARD	SYBR	None	19.6152			0.01	0.2	-2.32193	FALSE	20000	TRUE	3	10	63.247				N	N
D3		YY1 P1	STANDARD	SYBR	None	19.9039			0.01	0.2	-2.32193	FALSE	20000	TRUE	3	8	62.5002				N	N
E1		YY1 P1	STANDARD	SYBR	None	22.9572			0.001	0.02	-5.64386	FALSE	20000	TRUE	3	11	62.3507				N	N
E2		YY1 P1	STANDARD	SYBR	None	22.8175			0.001	0.02	-5.64386	FALSE	20000	TRUE	3	12	62.9432				N	N
E3		YY1 P1	STANDARD	SYBR	None	22.9981			0.001	0.02	-5.64386	FALSE	20000	TRUE	3	13	63.09				N	N
F1		YY1 P1	STANDARD	SYBR	None	26.4755			0.0001	0.002	-8.96578	FALSE	20000	TRUE	3	13	63.247				N	N
F2		YY1 P1	STANDARD	SYBR	None	26.9822			0.0001	0.002	-8.96578	FALSE	20000	TRUE	3	17	61.4474				N	N
F3		YY1 P1	STANDARD	SYBR	None	26.5965			0.0001	0.002	-8.96578	FALSE	20000	TRUE	3	18	63.2428				N	N
G1		YY1 P1	STANDARD	SYBR	None	28.1346			1e-05	0.0002	-12.2877	FALSE	20000	TRUE	3	17	60.395				Y	N
G2		YY1 P1	STANDARD	SYBR	None	27.8104			1e-05	0.0002	-12.2877	FALSE	20000	TRUE	3	14	63.247				Y	N
G3		YY1 P1	STANDARD	SYBR	None	30.0264			1e-05	0.0002	-12.2877	FALSE	20000	TRUE	3	19	62.6514				Y	N
										log2(pM)	CT
										7.64386	9.84077
										7.64386	9.69081
										7.64386	9.98398
										4.32193	13.0925				= 9938.6e-0.707x
										4.32193	13.3574
										4.32193	13.0766
										1	15.9142
										1	15.7581
										1	15.8273
										-2.32193	19.4884
										-2.32193	19.6152
										-2.32193	19.9039
										-5.64386	22.9572
										-5.64386	22.8175
										-5.64386	22.9981
										-8.96578	26.4755
										-8.96578	26.9822
										-8.96578	26.5965
										-12.2877	28.1346
										-12.2877	27.8104
										-12.2877	30.0264

## Sheet: YY1 Samp
						CT		JB calculated concentration 2_6_17 -- log2(pM)	pM
A7	48 Hr Scr KD 1	YY1 P1	UNKNOWN	SYBR	None	24.4434	0.000310517	-7.35684	0.00610057			FALSE	20000	TRUE	3	14	63.097				N	N
A8	48 Hr Scr KD 1	YY1 P1	UNKNOWN	SYBR	None	24.458	0.000307317	-7.37189	0.00603727			FALSE	20000	TRUE	3	16	61.7393				N	N
B7	48 Hr Scr KD 2	YY1 P1	UNKNOWN	SYBR	None	24.4224	0.00031516	-7.33528	0.00619241			FALSE	20000	TRUE	3	13	63.097				N	N
B8	48 Hr Scr KD 2	YY1 P1	UNKNOWN	SYBR	None	24.4556	0.000307849	-7.36938	0.00604779			FALSE	20000	TRUE	3	14	62.0567				N	N
C7	48 Hr Scr 3	YY1 P1	UNKNOWN	SYBR	None	24.3475	0.000332283	-7.25843	0.00653124			FALSE	20000	TRUE	3	14	61.5961				N	N
C8	48 Hr Scr 3	YY1 P1	UNKNOWN	SYBR	None	24.2304	0.000360982	-7.13809	0.00709938			FALSE	20000	TRUE	3	14	62.2055				N	N
D7	48 Hr YY1 KD 1	YY1 P1	UNKNOWN	SYBR	None	25.7843	0.000120328	-8.73396	0.00234864			FALSE	20000	TRUE	3	14	63.2488				N	N
D8	48 Hr YY1 KD 1	YY1 P1	UNKNOWN	SYBR	None	25.7035	0.000127395	-8.65106	0.00248755			FALSE	20000	TRUE	3	14	62.0567				N	N
E7	48 Hr YY1 KD 2	YY1 P1	UNKNOWN	SYBR	None	25.8641	0.000113721	-8.816	0.0022188			FALSE	20000	TRUE	3	16	62.9452				N	N
E8	48 Hr YY1 KD 2	YY1 P1	UNKNOWN	SYBR	None	25.6611	0.000131273	-8.6075	0.0025638			FALSE	20000	TRUE	3	14	62.0567				N	N
F7	48 Hr YY1 3	YY1 P1	UNKNOWN	SYBR	None	25.2754	0.000172423	-8.21141	0.0033738			FALSE	20000	TRUE	3	14	63.3993				N	N
F8	48 Hr YY1 3	YY1 P1	UNKNOWN	SYBR	None	25.4304	0.000154528	-8.37058	0.00302137			FALSE	20000	TRUE	3	14	62.0567				N	N
A9	78 Hr Scr 1	YY1 P1	UNKNOWN	SYBR	None	24.0736	0.000403287	-6.97711	0.00793745			FALSE	20000	TRUE	3	14	61.8983				N	N
A10	78 Hr Scr 1	YY1 P1	UNKNOWN	SYBR	None	24.1499	0.000382108	-7.05547	0.00751782			FALSE	20000	TRUE	3	15	62.6554				N	N
B9	78 Hr Scr 2	YY1 P1	UNKNOWN	SYBR	None	23.9368	0.000444246	-6.8366	0.00874942			FALSE	20000	TRUE	3	13	63.2488				Y	N
B10	78 Hr Scr 2	YY1 P1	UNKNOWN	SYBR	None	24.7587	0.000248464	-7.68069	0.00487395			FALSE	20000	TRUE	3	14	61.1536				Y	N
C9	78 Hr YY1 1	YY1 P1	UNKNOWN	SYBR	None	0	0					FALSE	20000	TRUE	3	39	61.7426				N	Y
C10	78 Hr YY1 1	YY1 P1	UNKNOWN	SYBR	None	25.2917	0.000170456	-8.22808	0.00333505			FALSE	20000	TRUE	3	15	62.505				N	N
D9	78 Hr YY1 2	YY1 P1	UNKNOWN	SYBR	None	25.3165	0.000167492	-8.25355	0.00327667			FALSE	20000	TRUE	3	15	63.2488				N	N
D10	78 Hr YY1 2	YY1 P1	UNKNOWN	SYBR	None	25.1867	0.000183582	-8.12031	0.00359371			FALSE	20000	TRUE	3	13	62.505				N	N
			Sample	Average Conc.	St Dev		Sample	Average	St Dev
			48 Hr Scr KD 1				48 Hr
			48 Hr Scr KD 2				Scr	#DIV/0!	#DIV/0!
			48 Hr Scr 3				YY1	#DIV/0!	#DIV/0!
			48 Hr YY1 KD 1
			48 Hr YY1 KD 2				78 Hr
			48 Hr YY1 3				Scr	0.00726966	0.000647675
			78 Hr Scr 1	0.00772763	0.000296728		YY1	0.00338512	7.08117e-05
			78 Hr Scr 2	0.00681168	0.00274037
			78 Hr YY1 1	0.00333505
			78 Hr YY1 2	0.00343519	0.000224182

## Sheet: aTub Std
										Starting Quantity (pM)	log2(pM)
A4		a-Tub	STANDARD	SYBR	None	23.5252			10	200	7.64386	FALSE	20000	TRUE	3	12	62.6514				Y	N
A5		a-Tub	STANDARD	SYBR	None	22.6919			10	200	7.64386	FALSE	20000	TRUE	3	9	63.0911				Y	N
A6		a-Tub	STANDARD	SYBR	None	21.4688			10	200	7.64386	FALSE	20000	TRUE	1	2	62.9391				Y	N
B4		a-Tub	STANDARD	SYBR	None	30.3851			1	20	4.32193	FALSE	20000	TRUE	3	18	63.2428				Y	N
B5		a-Tub	STANDARD	SYBR	None	28.6611			1	20	4.32193	FALSE	20000	TRUE	3	14	62.6527				Y	N
B6		a-Tub	STANDARD	SYBR	None	26.7251			1	20	4.32193	FALSE	20000	TRUE	3	13	62.9391				Y	N
C4		a-Tub	STANDARD	SYBR	None	32.871			0.1	2	1	FALSE	20000	TRUE	3	18	62.6514				Y	N
C5		a-Tub	STANDARD	SYBR	None	33.9639			0.1	2	1	FALSE	20000	TRUE	3	21	63.394				Y	N
C6		a-Tub	STANDARD	SYBR	None	33.7622			0.1	2	1	FALSE	20000	TRUE	3	22	62.9391				Y	N
D4		a-Tub	STANDARD	SYBR	None	35.8877			0.01	0.2	-2.32193	FALSE	20000	TRUE	3	26	62.5002				Y	N
D5		a-Tub	STANDARD	SYBR	None	36.4276			0.01	0.2	-2.32193	FALSE	20000	TRUE	3	23	63.394				Y	N
D6		a-Tub	STANDARD	SYBR	None	38.2908			0.01	0.2	-2.32193	FALSE	20000	TRUE	3	26	62.9391				Y	N
E4		a-Tub	STANDARD	SYBR	None	37.5488			0.001	0.02	-5.64386	FALSE	20000	TRUE	3	30	62.5002				N	N
E5		a-Tub	STANDARD	SYBR	None	37.0694			0.001	0.02	-5.64386	FALSE	20000	TRUE	3	25	62.2004				N	N
E6		a-Tub	STANDARD	SYBR	None	37.4676			0.001	0.02	-5.64386	FALSE	20000	TRUE	3	24	62.2004				N	N
F4		a-Tub	STANDARD	SYBR	None	38.5156			0.0001	0.002	-8.96578	FALSE	20000	TRUE	3	30	62.5002				Y	N
F5		a-Tub	STANDARD	SYBR	None	38.5879			0.0001	0.002	-8.96578	FALSE	20000	TRUE	3	26	62.6527				Y	N
F6		a-Tub	STANDARD	SYBR	None	37.336			0.0001	0.002	-8.96578	FALSE	20000	TRUE	3	26	63.394				Y	N
G4		a-Tub	STANDARD	SYBR	None	38.8979			1e-05	0.0002	-12.2877	FALSE	20000	TRUE	3	31	60.7013				Y	N
G5		a-Tub	STANDARD	SYBR	None	37.8988			1e-05	0.0002	-12.2877	FALSE	20000	TRUE	3	27	63.394				Y	N
G6		a-Tub	STANDARD	SYBR	None	38.6633			1e-05	0.0002	-12.2877	FALSE	20000	TRUE	3	26	62.9391				Y	N
	log2(pM)	CT
	7.64386	23.5252
	7.64386	22.6919
	7.64386	21.4688
	4.32193	30.3851
	4.32193	28.6611
	4.32193	26.7251
	1	32.871
	1	33.9639
	1	33.7622
	-2.32193	35.8877
	-2.32193	36.4276
	-2.32193	38.2908
	-5.64386	37.5488
	-5.64386	37.0694
	-5.64386	37.4676
	-8.96578	38.5156
	-8.96578	38.5879
	-8.96578	37.336
	-12.2877	38.8979
	-12.2877	37.8988
	-12.2877	38.6633

## Sheet: aTub samp 2_16_17
Well	Sample Name	Target Name	Task	Reporter	Quencher	Cт	JB Calculated log2(nM)	pM		-1.4408x + 34.222
E9	78 Hr Scr 1	a-Tub	UNKNOWN	SYBR	None	27.0217	4.99606	31.9127
E10	78 Hr Scr 1	a-Tub	UNKNOWN	SYBR	None	26.611	5.28107	38.8832
F9	78 Hr Scr 2	a-Tub	UNKNOWN	SYBR	None	26.7846	5.16058	35.7675
F10	78 Hr Scr 2	a-Tub	UNKNOWN	SYBR	None	26.8046	5.14671	35.4252
G9	78 Hr YY1 1	a-Tub	UNKNOWN	SYBR	None	26.8845	5.09124	34.0891
G10	78 Hr YY1 1	a-Tub	UNKNOWN	SYBR	None	26.9795	5.02537	32.5676
H9	78 Hr YY1 2	a-Tub	UNKNOWN	SYBR	None	26.938	5.05411	33.223
H10	78 Hr YY1 2	a-Tub	UNKNOWN	SYBR	None	26.9991	5.0117	32.2606

## Sheet: aTub Samp first analysis
							y = 74695e-0.398x
A11	48 Hr Scr KD 1	a-Tub	UNKNOWN	SYBR	None	26.9587	1.63494					FALSE	20000	TRUE	3	13	62.051				N	N
A12	48 Hr Scr KD 1	a-Tub	UNKNOWN	SYBR	None	26.2957	2.12864					FALSE	20000	TRUE	3	17	63.2507				N	N
B11	48 Hr Scr KD 2	a-Tub	UNKNOWN	SYBR	None	27.7915	1.1737					FALSE	20000	TRUE	3	18	62.8031				Y	N
B12	48 Hr Scr KD 2	a-Tub	UNKNOWN	SYBR	None	26.8522	1.70576					FALSE	20000	TRUE	3	16	63.2507				Y	N
C11	48 Hr Scr 3	a-Tub	UNKNOWN	SYBR	None	26.8338	1.71826					FALSE	20000	TRUE	3	17	62.3568				N	N
C12	48 Hr Scr 3	a-Tub	UNKNOWN	SYBR	None	26.6596	1.84159					FALSE	20000	TRUE	3	14	63.2507				N	N
D11	48 Hr YY1 KD 1	a-Tub	UNKNOWN	SYBR	None	27.233	1.46587					FALSE	20000	TRUE	3	17	62.3568				N	N
D12	48 Hr YY1 KD 1	a-Tub	UNKNOWN	SYBR	None	27.0442	1.58022					FALSE	20000	TRUE	3	16	63.4021				N	N
E11	48 Hr YY1 KD 2	a-Tub	UNKNOWN	SYBR	None	26.9267	1.65587					FALSE	20000	TRUE	3	12	62.9448				N	N
E12	48 Hr YY1 KD 2	a-Tub	UNKNOWN	SYBR	None	26.3918	2.04878					FALSE	20000	TRUE	3	13	63.2507				N	N
F11	48 Hr YY1 3	a-Tub	UNKNOWN	SYBR	None	27.4004	1.3714					FALSE	20000	TRUE	3	16	63.0978				N	N
F12	48 Hr YY1 3	a-Tub	UNKNOWN	SYBR	None	27.0233	1.59347					FALSE	20000	TRUE	3	16	63.2507				N	N
E9	78 Hr Scr 1	a-Tub	UNKNOWN	SYBR	None	27.0217	1.59447					FALSE	20000	TRUE	3	18	63.2488				N	N
E10	78 Hr Scr 1	a-Tub	UNKNOWN	SYBR	None	26.611	1.87757					FALSE	20000	TRUE	3	12	62.505				N	N
F9	78 Hr Scr 2	a-Tub	UNKNOWN	SYBR	None	26.7846	1.75222					FALSE	20000	TRUE	3	12	63.3998				N	N
F10	78 Hr Scr 2	a-Tub	UNKNOWN	SYBR	None	26.8046	1.73833					FALSE	20000	TRUE	3	16	62.505				N	N
G9	78 Hr YY1 1	a-Tub	UNKNOWN	SYBR	None	26.8845	1.68391					FALSE	20000	TRUE	3	15	63.3998				N	N
G10	78 Hr YY1 1	a-Tub	UNKNOWN	SYBR	None	26.9795	1.62149					FALSE	20000	TRUE	3	17	62.505				N	N
H9	78 Hr YY1 2	a-Tub	UNKNOWN	SYBR	None	26.938	1.64844					FALSE	20000	TRUE	3	18	63.2488				N	N
H10	78 Hr YY1 2	a-Tub	UNKNOWN	SYBR	None	26.9991	1.60884					FALSE	20000	TRUE	3	14	62.6554				N	N
			Sample	Average Conc.	St Dev	SEM
			48 Hr Scr KD 1	1.88179	0.3491	0.246851
			48 Hr Scr KD 2	1.43973	0.376223	0.26603
			48 Hr Scr 3	1.77993	0.0872037	0.0616623
			48 Hr YY1 KD 1	1.52304	0.0808579	0.0571751
			48 Hr YY1 KD 2	1.85233	0.277829	0.196455
			48 Hr YY1 3	1.48243	0.157031	0.111038
			78 Hr Scr 1	1.73602	0.200185	0.141552
			78 Hr Scr 2	1.74527	0.00981608	0.00694102
			78 Hr YY1 1	1.6527	0.0441371	0.0312097
			78 Hr YY1 2	1.62864	0.0280044	0.0198021
			Sample
			48 Hr
			Scr	1.70048	0.231488
			YY1	1.61927	0.202854
			78 Hr
			Scr	1.74065	0.00654485
			YY1	1.64067	0.0170154
