# Supplementary material for: YY1 and CTCF orchestrate a 3D chromatin looping switch during early neural lineage commitment
Source: HighWire-hosted journal article supplement (doi:10.1101/gr.215160.116), 2017-05-23
Supplement: Supplemental_custom_scripts_5C_analysis.zip [file 12_4_YY1_KD_Exp6_JB_Olig2_Sox2_2_6_17_analysis.xls]

## Sheet: Results
Block Type	96well
Chemistry	SYBR_GREEN
Experiment File Name	D:\Applied Biosystems\StepOne Software v2.3\experiments\JB\12_4_YY1_KD_Exp6_JB_Olig2_Sox2.eds
Experiment Run End Time	2016-12-04 20:36:07 PM PST
Instrument Type	steponeplus
Passive Reference
Well	Sample Name	Target Name	Task	Reporter	Quencher	Cт	Cт Mean	Cт SD	Quantity	Quantity Mean	Quantity SD	Automatic Ct Threshold	Ct Threshold	Automatic Baseline	Baseline Start	Baseline End	Tm1	Tm2	Tm3	Comments	HIGHSD	MTP
A1		Olig2	STANDARD	SYBR	None	9.71638	9.7028	0.29186	10			FALSE	20000	TRUE	1	2	80.6442				N	N
A2		Olig2	STANDARD	SYBR	None	9.40438	9.7028	0.29186	10			FALSE	20000	TRUE	1	2	80.6442				N	N
A3		Olig2	STANDARD	SYBR	None	9.98763	9.7028	0.29186	10			FALSE	20000	TRUE	1	2	80.3439				N	N
A4		Sox2	STANDARD	SYBR	None	13.2288	12.9266	0.289634	10			FALSE	20000	TRUE	1	2	86.9058	77.6595			N	Y
A5		Sox2	STANDARD	SYBR	None	12.6514	12.9266	0.289634	10			FALSE	20000	TRUE	1	2	86.9079	77.6624			N	Y
A6		Sox2	STANDARD	SYBR	None	12.8998	12.9266	0.289634	10			FALSE	20000	TRUE	1	2	86.9079	77.6624			N	Y
A7	48 Hr Scr KD 1	Olig2	UNKNOWN	SYBR	None	23.9791	23.9731	0.00848062	0.000279813	0.000281055	1.75759e-06	FALSE	20000	TRUE	3	14	80.4959				N	N
A8	48 Hr Scr KD 1	Olig2	UNKNOWN	SYBR	None	23.9671	23.9731	0.00848062	0.000282298	0.000281055	1.75759e-06	FALSE	20000	TRUE	3	14	80.4959				N	N
A9	78 Hr Scr 1	Olig2	UNKNOWN	SYBR	None	23.198	23.1873	0.015154	0.000497749	0.000501713	5.60627e-06	FALSE	20000	TRUE	3	11	80.2002				N	N
A10	78 Hr Scr 1	Olig2	UNKNOWN	SYBR	None	23.1766	23.1873	0.015154	0.000505677	0.000501713	5.60627e-06	FALSE	20000	TRUE	3	10	80.2002				N	N
A11	48 Hr Scr KD 1	Sox2	UNKNOWN	SYBR	None	27.6373	27.6316	0.00812322	0.000198622	0.00019952	1.27052e-06	FALSE	20000	TRUE	3	17	86.911				N	N
A12	48 Hr Scr KD 1	Sox2	UNKNOWN	SYBR	None	27.6258	27.6316	0.00812322	0.000200419	0.00019952	1.27052e-06	FALSE	20000	TRUE	3	16	86.911				N	N
B1		Olig2	STANDARD	SYBR	None	12.6757	12.6918	0.0959789	1			FALSE	20000	TRUE	1	2	80.4951				N	N
B2		Olig2	STANDARD	SYBR	None	12.6049	12.6918	0.0959789	1			FALSE	20000	TRUE	1	2	80.4951				N	N
B3		Olig2	STANDARD	SYBR	None	12.7948	12.6918	0.0959789	1			FALSE	20000	TRUE	1	2	80.3439				N	N
B4		Sox2	STANDARD	SYBR	None	16.5782	16.4397	0.129033	1			FALSE	20000	TRUE	3	8	86.7567	77.6595			N	Y
B5		Sox2	STANDARD	SYBR	None	16.3229	16.4397	0.129033	1			FALSE	20000	TRUE	3	4	86.9079	77.8115			N	Y
B6		Sox2	STANDARD	SYBR	None	16.418	16.4397	0.129033	1			FALSE	20000	TRUE	3	6	86.9079	77.8115			N	Y
B7	48 Hr Scr KD 2	Olig2	UNKNOWN	SYBR	None	23.7036	23.6807	0.0324767	0.000342835	0.00034874	8.35088e-06	FALSE	20000	TRUE	3	13	80.3468				N	N
B8	48 Hr Scr KD 2	Olig2	UNKNOWN	SYBR	None	23.6577	23.6807	0.0324767	0.000354645	0.00034874	8.35088e-06	FALSE	20000	TRUE	3	13	80.3468				N	N
B9	78 Hr Scr 2	Olig2	UNKNOWN	SYBR	None	23.1963	23.0303	0.234698	0.000498389	0.000567492	9.77255e-05	FALSE	20000	TRUE	3	13	80.0511				N	N
B10	78 Hr Scr 2	Olig2	UNKNOWN	SYBR	None	22.8644	23.0303	0.234698	0.000636594	0.000567492	9.77255e-05	FALSE	20000	TRUE	3	15	80.2002				N	N
B11	48 Hr Scr KD 2	Sox2	UNKNOWN	SYBR	None	27.3592	27.3491	0.0142841	0.000246997	0.000248969	2.78776e-06	FALSE	20000	TRUE	3	16	86.911				N	N
B12	48 Hr Scr KD 2	Sox2	UNKNOWN	SYBR	None	27.339	27.3491	0.0142841	0.00025094	0.000248969	2.78776e-06	FALSE	20000	TRUE	3	18	86.911	67.9673			N	Y
C1		Olig2	STANDARD	SYBR	None	15.9707	15.9003	0.104108	0.1			FALSE	20000	TRUE	3	7	80.3459				N	N
C2		Olig2	STANDARD	SYBR	None	15.7807	15.9003	0.104108	0.1			FALSE	20000	TRUE	3	6	80.3459				N	N
C3		Olig2	STANDARD	SYBR	None	15.9495	15.9003	0.104108	0.1			FALSE	20000	TRUE	3	5	80.1948				N	N
C4		Sox2	STANDARD	SYBR	None	19.296	19.0815	0.296213	0.1			FALSE	20000	TRUE	3	11	86.9058	77.6595			N	Y
C5		Sox2	STANDARD	SYBR	None	18.7435	19.0815	0.296213	0.1			FALSE	20000	TRUE	3	7	86.9079	77.6624			N	Y
C6		Sox2	STANDARD	SYBR	None	19.205	19.0815	0.296213	0.1			FALSE	20000	TRUE	3	7	86.9079	77.8115			N	Y
C7	48 Hr Scr 3	Olig2	UNKNOWN	SYBR	None	23.5146	23.5404	0.0363569	0.000394104	0.000386773	1.03679e-05	FALSE	20000	TRUE	3	14	80.3468				N	N
C8	48 Hr Scr 3	Olig2	UNKNOWN	SYBR	None	23.5661	23.5404	0.0363569	0.000379441	0.000386773	1.03679e-05	FALSE	20000	TRUE	3	10	80.3468				N	N
C9	78 Hr YY1 1	Olig2	UNKNOWN	SYBR	None	23.5972	23.6377	0.0573184	0.000370836	0.000360077	1.52146e-05	FALSE	20000	TRUE	3	14	80.0511				N	N
C10	78 Hr YY1 1	Olig2	UNKNOWN	SYBR	None	23.6782	23.6377	0.0573184	0.000349319	0.000360077	1.52146e-05	FALSE	20000	TRUE	3	12	80.0511				N	N
C11	48 Hr Scr 3	Sox2	UNKNOWN	SYBR	None	27.0632	27.1021	0.0549892	0.000311517	0.000302305	1.30273e-05	FALSE	20000	TRUE	3	14	86.911				N	N
C12	48 Hr Scr 3	Sox2	UNKNOWN	SYBR	None	27.141	27.1021	0.0549892	0.000293093	0.000302305	1.30273e-05	FALSE	20000	TRUE	3	17	86.911	68.1164			N	Y
D1		Olig2	STANDARD	SYBR	None	18.9492	19.1872	0.214669	0.01			FALSE	20000	TRUE	3	9	80.1968				N	N
D2		Olig2	STANDARD	SYBR	None	19.3661	19.1872	0.214669	0.01			FALSE	20000	TRUE	3	9	80.1968				N	N
D3		Olig2	STANDARD	SYBR	None	19.2463	19.1872	0.214669	0.01			FALSE	20000	TRUE	3	8	80.1948				N	N
D4		Sox2	STANDARD	SYBR	None	23.1727	22.7043	0.483446	0.01			FALSE	20000	TRUE	3	14	86.7567	77.5103			N	Y
D5		Sox2	STANDARD	SYBR	None	22.7332	22.7043	0.483446	0.01			FALSE	20000	TRUE	3	12	86.9079	77.6624			N	Y
D6		Sox2	STANDARD	SYBR	None	22.2071	22.7043	0.483446	0.01			FALSE	20000	TRUE	3	12	86.9079	77.8115			N	Y
D7	48 Hr YY1 KD 1	Olig2	UNKNOWN	SYBR	None	23.5676	23.6128	0.0639472	0.00037902	0.000366794	1.72895e-05	FALSE	20000	TRUE	3	14	80.3468				N	N
D8	48 Hr YY1 KD 1	Olig2	UNKNOWN	SYBR	None	23.658	23.6128	0.0639472	0.000354569	0.000366794	1.72895e-05	FALSE	20000	TRUE	3	11	80.3468				N	N
D9	78 Hr YY1 2	Olig2	UNKNOWN	SYBR	None	23.9953	23.9722	0.0326776	0.000276487	0.000281279	6.77712e-06	FALSE	20000	TRUE	3	14	79.9019				N	N
D10	78 Hr YY1 2	Olig2	UNKNOWN	SYBR	None	23.9491	23.9722	0.0326776	0.000286071	0.000281279	6.77712e-06	FALSE	20000	TRUE	3	14	80.0511				N	N
D11	48 Hr YY1 KD 1	Sox2	UNKNOWN	SYBR	None	27.0769	27.1597	0.117048	0.00030818	0.000289427	2.65194e-05	FALSE	20000	TRUE	3	14	86.7618				N	N
D12	48 Hr YY1 KD 1	Sox2	UNKNOWN	SYBR	None	27.2425	27.1597	0.117048	0.000270675	0.000289427	2.65194e-05	FALSE	20000	TRUE	3	18	86.7618	67.8181			N	Y
E1		Olig2	STANDARD	SYBR	None	22.6045	22.6941	0.16365	0.001			FALSE	20000	TRUE	3	11	80.1968				N	N
E2		Olig2	STANDARD	SYBR	None	22.883	22.6941	0.16365	0.001			FALSE	20000	TRUE	3	13	80.0477				N	N
E3		Olig2	STANDARD	SYBR	None	22.5949	22.6941	0.16365	0.001			FALSE	20000	TRUE	3	12	80.0456				N	N
E4		Sox2	STANDARD	SYBR	None	26.7126	27.6332	1.02163	0.001			FALSE	20000	TRUE	3	16	78.1069	86.9058			Y	Y
E5		Sox2	STANDARD	SYBR	None	27.4547	27.6332	1.02163	0.001			FALSE	20000	TRUE	3	18	77.9606	86.9079			Y	Y
E6		Sox2	STANDARD	SYBR	None	28.7323	27.6332	1.02163	0.001			FALSE	20000	TRUE	3	18	77.9606	86.9079			Y	Y
E7	48 Hr YY1 KD 2	Olig2	UNKNOWN	SYBR	None	23.6285	23.6046	0.0338753	0.000362363	0.000368878	9.21341e-06	FALSE	20000	TRUE	3	14	80.3468				N	N
E8	48 Hr YY1 KD 2	Olig2	UNKNOWN	SYBR	None	23.5806	23.6046	0.0338753	0.000375393	0.000368878	9.21341e-06	FALSE	20000	TRUE	3	11	80.3468				N	N
E9	78 Hr Scr 1	Sox2	UNKNOWN	SYBR	None	26.5849	26.5987	0.019517	0.000453226	0.000448376	6.85971e-06	FALSE	20000	TRUE	3	14	86.7625	66.4791			N	Y
E10	78 Hr Scr 1	Sox2	UNKNOWN	SYBR	None	26.6125	26.5987	0.019517	0.000443525	0.000448376	6.85971e-06	FALSE	20000	TRUE	3	16	86.7625	67.6722			N	Y
E11	48 Hr YY1 KD 2	Sox2	UNKNOWN	SYBR	None	27.2952	27.2561	0.0553331	0.000259712	0.000267927	1.1618e-05	FALSE	20000	TRUE	3	15	86.7618	68.5639			N	Y
E12	48 Hr YY1 KD 2	Sox2	UNKNOWN	SYBR	None	27.217	27.2561	0.0553331	0.000276143	0.000267927	1.1618e-05	FALSE	20000	TRUE	3	18	86.7618				N	N
F1		Olig2	STANDARD	SYBR	None	25.9797	26.058	0.225538	0.0001			FALSE	20000	TRUE	3	18	80.0477				N	N
F2		Olig2	STANDARD	SYBR	None	25.882	26.058	0.225538	0.0001			FALSE	20000	TRUE	3	14	80.0477				N	N
F3		Olig2	STANDARD	SYBR	None	26.3122	26.058	0.225538	0.0001			FALSE	20000	TRUE	3	14	80.0456				N	N
F4		Sox2	STANDARD	SYBR	None	33.6216	33.6953	0.0638157	0.0001			FALSE	20000	TRUE	3	25	77.9577	86.9058			N	Y
F5		Sox2	STANDARD	SYBR	None	33.7294	33.6953	0.0638157	0.0001			FALSE	20000	TRUE	3	21	86.9079	76.9167			N	Y
F6		Sox2	STANDARD	SYBR	None	33.7347	33.6953	0.0638157	0.0001			FALSE	20000	TRUE	3	22	77.9606	87.057			N	Y
F7	48 Hr YY1 3	Olig2	UNKNOWN	SYBR	None	23.4004	23.4095	0.0128356	0.000428728	0.000425878	4.03083e-06	FALSE	20000	TRUE	3	13	80.3468				N	N
F8	48 Hr YY1 3	Olig2	UNKNOWN	SYBR	None	23.4186	23.4095	0.0128356	0.000423028	0.000425878	4.03083e-06	FALSE	20000	TRUE	3	11	80.3468				N	N
F9	78 Hr Scr 2	Sox2	UNKNOWN	SYBR	None	26.5265	26.6136	0.123206	0.000474472	0.000444184	4.2834e-05	FALSE	20000	TRUE	3	13	86.7625				N	N
F10	78 Hr Scr 2	Sox2	UNKNOWN	SYBR	None	26.7007	26.6136	0.123206	0.000413896	0.000444184	4.2834e-05	FALSE	20000	TRUE	3	16	86.7625	68.4179			N	Y
F11	48 Hr YY1 3	Sox2	UNKNOWN	SYBR	None	26.9743	27.0796	0.149002	0.000334013	0.000308584	3.59621e-05	FALSE	20000	TRUE	3	15	86.7618	68.7131			N	Y
F12	48 Hr YY1 3	Sox2	UNKNOWN	SYBR	None	27.185	27.0796	0.149002	0.000283155	0.000308584	3.59621e-05	FALSE	20000	TRUE	3	18	86.7618				N	N
G1		Olig2	STANDARD	SYBR	None	26.7857	27.6725	0.778349	1e-05			FALSE	20000	TRUE	3	17	80.0477				Y	N
G2		Olig2	STANDARD	SYBR	None	28.2426	27.6725	0.778349	1e-05			FALSE	20000	TRUE	3	16	79.8986				Y	N
G3		Olig2	STANDARD	SYBR	None	27.9892	27.6725	0.778349	1e-05			FALSE	20000	TRUE	3	16	80.0456				Y	N
G4		Sox2	STANDARD	SYBR	None	26.0021	25.988	0.0477403	1e-05			FALSE	20000	TRUE	3	15	86.9058	77.6595			N	Y
G5		Sox2	STANDARD	SYBR	None	25.9348	25.988	0.0477403	1e-05			FALSE	20000	TRUE	3	15	87.057	77.6624			N	Y
G6		Sox2	STANDARD	SYBR	None	26.027	25.988	0.0477403	1e-05			FALSE	20000	TRUE	3	13	87.057	77.8115			N	Y
G7																					N	N
G8																					N	N
G9	78 Hr YY1 1	Sox2	UNKNOWN	SYBR	None	26.8668	26.8953	0.040345	0.00036336	0.000355413	1.12387e-05	FALSE	20000	TRUE	3	16	86.9116	67.2248			N	Y
G10	78 Hr YY1 1	Sox2	UNKNOWN	SYBR	None	26.9239	26.8953	0.040345	0.000347466	0.000355413	1.12387e-05	FALSE	20000	TRUE	3	17	86.7625	67.9705			N	Y
G11																					N	N
G12																					N	N
H1		Olig2	NTC	SYBR	None	Undetermined						FALSE	20000	TRUE	3	39	61.2581				N	N
H2		Olig2	NTC	SYBR	None	Undetermined						FALSE	20000	TRUE	3	37	61.5563				N	N
H3		Olig2	NTC	SYBR	None	Undetermined						FALSE	20000	TRUE	3	39	66.3252				N	N
H4		Sox2	NTC	SYBR	None	Undetermined						FALSE	20000	TRUE	3	28	76.9138	66.9218			N	Y
H5		Sox2	NTC	SYBR	None	Undetermined						FALSE	20000	TRUE	3	36	65.7326	79.6009	61.1098		N	Y
H6		Sox2	NTC	SYBR	None	Undetermined						FALSE	20000	TRUE	3	35	66.18	61.1098	88.6974		N	Y
H7																					N	N
H8																					N	N
H9	78 Hr YY1 2	Sox2	UNKNOWN	SYBR	None	27.2987	27.272	0.0377852	0.000259009	0.000264549	7.83487e-06	FALSE	20000	TRUE	3	17	86.9116				N	N
H10	78 Hr YY1 2	Sox2	UNKNOWN	SYBR	None	27.2452	27.272	0.0377852	0.000270089	0.000264549	7.83487e-06	FALSE	20000	TRUE	3	17	86.9116				N	N
H11																					N	N
H12																					N	N

## Sheet: Olig Samp
Well	Sample Name	Target Name	Task	Reporter	Quencher	Cт	Cт Mean	Cт SD	Quantity	Quantity Mean	Quantity SD	Automatic Ct Threshold	Ct Threshold	Automatic Baseline	Baseline Start	Baseline End	Tm1	Tm2	Tm3	Comments	HIGHSD	MTP
A7	48 Hr Scr KD 1	Olig2	UNKNOWN	SYBR	None	23.9791	23.9731	0.00848062	0.000279813	0.000281055	1.75759e-06	FALSE	20000	TRUE	3	14	80.4959				N	N
A8	48 Hr Scr KD 1	Olig2	UNKNOWN	SYBR	None	23.9671	23.9731	0.00848062	0.000282298	0.000281055	1.75759e-06	FALSE	20000	TRUE	3	14	80.4959				N	N
B7	48 Hr Scr KD 2	Olig2	UNKNOWN	SYBR	None	23.7036	23.6807	0.0324767	0.000342835	0.00034874	8.35088e-06	FALSE	20000	TRUE	3	13	80.3468				N	N
B8	48 Hr Scr KD 2	Olig2	UNKNOWN	SYBR	None	23.6577	23.6807	0.0324767	0.000354645	0.00034874	8.35088e-06	FALSE	20000	TRUE	3	13	80.3468				N	N
C7	48 Hr Scr 3	Olig2	UNKNOWN	SYBR	None	23.5146	23.5404	0.0363569	0.000394104	0.000386773	1.03679e-05	FALSE	20000	TRUE	3	14	80.3468				N	N
C8	48 Hr Scr 3	Olig2	UNKNOWN	SYBR	None	23.5661	23.5404	0.0363569	0.000379441	0.000386773	1.03679e-05	FALSE	20000	TRUE	3	10	80.3468				N	N
D7	48 Hr YY1 KD 1	Olig2	UNKNOWN	SYBR	None	23.5676	23.6128	0.0639472	0.00037902	0.000366794	1.72895e-05	FALSE	20000	TRUE	3	14	80.3468				N	N
D8	48 Hr YY1 KD 1	Olig2	UNKNOWN	SYBR	None	23.658	23.6128	0.0639472	0.000354569	0.000366794	1.72895e-05	FALSE	20000	TRUE	3	11	80.3468				N	N
E7	48 Hr YY1 KD 2	Olig2	UNKNOWN	SYBR	None	23.6285	23.6046	0.0338753	0.000362363	0.000368878	9.21341e-06	FALSE	20000	TRUE	3	14	80.3468				N	N
E8	48 Hr YY1 KD 2	Olig2	UNKNOWN	SYBR	None	23.5806	23.6046	0.0338753	0.000375393	0.000368878	9.21341e-06	FALSE	20000	TRUE	3	11	80.3468				N	N
F7	48 Hr YY1 3	Olig2	UNKNOWN	SYBR	None	23.4004	23.4095	0.0128356	0.000428728	0.000425878	4.03083e-06	FALSE	20000	TRUE	3	13	80.3468				N	N
F8	48 Hr YY1 3	Olig2	UNKNOWN	SYBR	None	23.4186	23.4095	0.0128356	0.000423028	0.000425878	4.03083e-06	FALSE	20000	TRUE	3	11	80.3468				N	N
A9	78 Hr Scr 1	Olig2	UNKNOWN	SYBR	None	23.198	23.1873	0.015154	0.000497749	0.000501713	5.60627e-06	FALSE	20000	TRUE	3	11	80.2002				N	N
A10	78 Hr Scr 1	Olig2	UNKNOWN	SYBR	None	23.1766	23.1873	0.015154	0.000505677	0.000501713	5.60627e-06	FALSE	20000	TRUE	3	10	80.2002				N	N
B9	78 Hr Scr 2	Olig2	UNKNOWN	SYBR	None	23.1963	23.0303	0.234698	0.000498389	0.000567492	9.77255e-05	FALSE	20000	TRUE	3	13	80.0511				N	N
B10	78 Hr Scr 2	Olig2	UNKNOWN	SYBR	None	22.8644	23.0303	0.234698	0.000636594	0.000567492	9.77255e-05	FALSE	20000	TRUE	3	15	80.2002				N	N
C9	78 Hr YY1 1	Olig2	UNKNOWN	SYBR	None	23.5972	23.6377	0.0573184	0.000370836	0.000360077	1.52146e-05	FALSE	20000	TRUE	3	14	80.0511				N	N
C10	78 Hr YY1 1	Olig2	UNKNOWN	SYBR	None	23.6782	23.6377	0.0573184	0.000349319	0.000360077	1.52146e-05	FALSE	20000	TRUE	3	12	80.0511				N	N
D9	78 Hr YY1 2	Olig2	UNKNOWN	SYBR	None	23.9953	23.9722	0.0326776	0.000276487	0.000281279	6.77712e-06	FALSE	20000	TRUE	3	14	79.9019				N	N
D10	78 Hr YY1 2	Olig2	UNKNOWN	SYBR	None	23.9491	23.9722	0.0326776	0.000286071	0.000281279	6.77712e-06	FALSE	20000	TRUE	3	14	80.0511				N	N
																Sample	Average	StDev
																48 Hr Scr KD 1	0.000281055	1.75759e-06
																48 Hr Scr KD 2	0.00034874	8.35088e-06
																48 Hr Scr 3	0.000386773	1.03679e-05
																48 Hr YY1 KD 1	0.000366794	1.72895e-05
																48 Hr YY1 KD 2	0.000368878	9.21341e-06
																48 Hr YY1 3	0.000425878	4.03083e-06
																78 Hr Scr 1	0.000501713	5.60627e-06
																78 Hr Scr 2	0.000567492	9.77255e-05
																78 Hr YY1 1	0.000360077	1.52146e-05
																78 Hr YY1 2	0.000281279	6.77712e-06
																Sample	Average	StDev
																48 Hr
																Scr	0.000338856	5.35472e-05
																YY1	0.000387183	3.35267e-05
																78 Hr
																Scr	0.000534602	4.65123e-05
																YY1	0.000320678	5.57188e-05

## Sheet: Olg2 Samp Reanal 2_16_17
Well	Sample Name	Target Name	Task	Reporter	Quencher	Cт		JB calculated quantity -- log2(pM)	JB calculated quantity -- pM				-0.94x + 16.947
A9	78 Hr Scr 1	Olig2	UNKNOWN	SYBR	None	23.198		-6.65002	0.00995739
A10	78 Hr Scr 1	Olig2	UNKNOWN	SYBR	None	23.1766		-6.62722	0.010116
B9	78 Hr Scr 2	Olig2	UNKNOWN	SYBR	None	23.1963		-6.64816	0.0099702
B10	78 Hr Scr 2	Olig2	UNKNOWN	SYBR	None	22.8644		-6.29506	0.012735
C9	78 Hr YY1 1	Olig2	UNKNOWN	SYBR	None	23.5972		-7.07465	0.00741852
C10	78 Hr YY1 1	Olig2	UNKNOWN	SYBR	None	23.6782		-7.16089	0.00698808
D9	78 Hr YY1 2	Olig2	UNKNOWN	SYBR	None	23.9953		-7.49822	0.00553109
D10	78 Hr YY1 2	Olig2	UNKNOWN	SYBR	None	23.9491		-7.44906	0.00572282
Sample	Average	StDev			Sample	Average	StDev
78 Hr Scr 1	0.0100367	0.000112152			78 Hr
78 Hr Scr 2	0.0113526	0.00195497			Scr	0.0106946	0.000930468
78 Hr YY1 1	0.0072033	0.000304364			YY1	0.00641513	0.00111464
78 Hr YY1 2	0.00562696	0.000135575

## Sheet: Sox2 Samples
Well	Sample Name	Target Name	Task	Reporter	Quencher	Cт	Cт Mean	Cт SD	Quantity	Quantity Mean	Quantity SD		JB calculated quantity -- log2(pM)	JB calculated quantity -- pM		Automatic Ct Threshold	Ct Threshold	Automatic Baseline	Baseline Start	Baseline End	Tm1	Tm2	Tm3	Comments	HIGHSD	MTP
A11	48 Hr Scr KD 1	Sox2	UNKNOWN	SYBR	None	27.6373	27.6316	0.00812322	0.000198622	0.00019952	1.27052e-06		-6.33734	0.0123672		FALSE	20000	TRUE	3	17	86.911				N	N
A12	48 Hr Scr KD 1	Sox2	UNKNOWN	SYBR	None	27.6258	27.6316	0.00812322	0.000200419	0.00019952	1.27052e-06		-6.32664	0.0124592		FALSE	20000	TRUE	3	16	86.911				N	N
B11	48 Hr Scr KD 2	Sox2	UNKNOWN	SYBR	None	27.3592	27.3491	0.0142841	0.000246997	0.000248969	2.78776e-06		-6.07844	0.0147981		FALSE	20000	TRUE	3	16	86.911				N	N
B12	48 Hr Scr KD 2	Sox2	UNKNOWN	SYBR	None	27.339	27.3491	0.0142841	0.00025094	0.000248969	2.78776e-06		-6.05963	0.0149923		FALSE	20000	TRUE	3	18	86.911	67.9673			N	Y
C11	48 Hr Scr 3	Sox2	UNKNOWN	SYBR	None	27.0632	27.1021	0.0549892	0.000311517	0.000302305	1.30273e-05		-5.80279	0.0179137		FALSE	20000	TRUE	3	14	86.911				N	N
C12	48 Hr Scr 3	Sox2	UNKNOWN	SYBR	None	27.141	27.1021	0.0549892	0.000293093	0.000302305	1.30273e-05		-5.8752	0.0170368		FALSE	20000	TRUE	3	17	86.911	68.1164			N	Y
D11	48 Hr YY1 KD 1	Sox2	UNKNOWN	SYBR	None	27.0769	27.1597	0.117048	0.00030818	0.000289427	2.65194e-05		-5.81558	0.0177556		FALSE	20000	TRUE	3	14	86.7618				N	N
D12	48 Hr YY1 KD 1	Sox2	UNKNOWN	SYBR	None	27.2425	27.1597	0.117048	0.000270675	0.000289427	2.65194e-05		-5.96971	0.0159565		FALSE	20000	TRUE	3	18	86.7618	67.8181			N	Y
E11	48 Hr YY1 KD 2	Sox2	UNKNOWN	SYBR	None	27.2952	27.2561	0.0553331	0.000259712	0.000267927	1.1618e-05		-6.01882	0.0154225		FALSE	20000	TRUE	3	15	86.7618	68.5639			N	Y
E12	48 Hr YY1 KD 2	Sox2	UNKNOWN	SYBR	None	27.217	27.2561	0.0553331	0.000276143	0.000267927	1.1618e-05		-5.94596	0.0162214		FALSE	20000	TRUE	3	18	86.7618				N	N
F11	48 Hr YY1 3	Sox2	UNKNOWN	SYBR	None	26.9743	27.0796	0.149002	0.000334013	0.000308584	3.59621e-05		-5.71997	0.0189722		FALSE	20000	TRUE	3	15	86.7618	68.7131			N	Y
F12	48 Hr YY1 3	Sox2	UNKNOWN	SYBR	None	27.185	27.0796	0.149002	0.000283155	0.000308584	3.59621e-05		-5.91617	0.0165598		FALSE	20000	TRUE	3	18	86.7618				N	N
E9	78 Hr Scr 1	Sox2	UNKNOWN	SYBR	None	26.5849	26.5987	0.019517	0.000453226	0.000448376	6.85971e-06		-5.35745	0.0243919		FALSE	20000	TRUE	3	14	86.7625	66.4791			N	Y
E10	78 Hr Scr 1	Sox2	UNKNOWN	SYBR	None	26.6125	26.5987	0.019517	0.000443525	0.000448376	6.85971e-06		-5.38315	0.0239612		FALSE	20000	TRUE	3	16	86.7625	67.6722			N	Y
F9	78 Hr Scr 2	Sox2	UNKNOWN	SYBR	None	26.5265	26.6136	0.123206	0.000474472	0.000444184	4.2834e-05		-5.30304	0.0253294		FALSE	20000	TRUE	3	13	86.7625				N	N
F10	78 Hr Scr 2	Sox2	UNKNOWN	SYBR	None	26.7007	26.6136	0.123206	0.000413896	0.000444184	4.2834e-05		-5.46528	0.0226354		FALSE	20000	TRUE	3	16	86.7625	68.4179			N	Y
G9	78 Hr YY1 1	Sox2	UNKNOWN	SYBR	None	26.8668	26.8953	0.040345	0.00036336	0.000355413	1.12387e-05		-5.61995	0.0203342		FALSE	20000	TRUE	3	16	86.9116	67.2248			N	Y
G10	78 Hr YY1 1	Sox2	UNKNOWN	SYBR	None	26.9239	26.8953	0.040345	0.000347466	0.000355413	1.12387e-05		-5.67307	0.0195991		FALSE	20000	TRUE	3	17	86.7625	67.9705			N	Y
H9	78 Hr YY1 2	Sox2	UNKNOWN	SYBR	None	27.2987	27.272	0.0377852	0.000259009	0.000264549	7.83487e-06		-6.02204	0.0153881		FALSE	20000	TRUE	3	17	86.9116				N	N
H10	78 Hr YY1 2	Sox2	UNKNOWN	SYBR	None	27.2452	27.272	0.0377852	0.000270089	0.000264549	7.83487e-06		-5.97228	0.0159281		FALSE	20000	TRUE	3	17	86.9116				N	N
																Sample	Average	StDev
																78 Hr Scr 1	0.0241766	0.000304522
																78 Hr Scr 2	0.0239824	0.00190498
																78 Hr YY1 1	0.0199667	0.000519837
																78 Hr YY1 2	0.0156581	0.000381802
																Sample	Average	StDev
																48 Hr
																Scr	#DIV/0!	#DIV/0!
																YY1	#DIV/0!	#DIV/0!
																78 Hr
																Scr	0.0240795	0.000137291
																YY1	0.0178124	0.00304661

## Sheet: Sox2 Std
Well	Sample Name	Target Name	Task	Reporter	Quencher	Cт	Cт Mean	Cт SD	Quantity	Starting Quantity (pM)	log2(pM)	Automatic Ct Threshold	Ct Threshold	Automatic Baseline	Baseline Start	Baseline End	Tm1	Tm2	Tm3	Comments	HIGHSD	MTP
A4		Sox2	STANDARD	SYBR	None	13.2288	12.9266	0.289634	10	200	7.64386	FALSE	20000	TRUE	1	2	86.9058	77.6595			N	Y
A5		Sox2	STANDARD	SYBR	None	12.6514	12.9266	0.289634	10	200	7.64386	FALSE	20000	TRUE	1	2	86.9079	77.6624			N	Y
A6		Sox2	STANDARD	SYBR	None	12.8998	12.9266	0.289634	10	200	7.64386	FALSE	20000	TRUE	1	2	86.9079	77.6624			N	Y
B4		Sox2	STANDARD	SYBR	None	16.5782	16.4397	0.129033	1	20	4.32193	FALSE	20000	TRUE	3	8	86.7567	77.6595			N	Y
B5		Sox2	STANDARD	SYBR	None	16.3229	16.4397	0.129033	1	20	4.32193	FALSE	20000	TRUE	3	4	86.9079	77.8115			N	Y
B6		Sox2	STANDARD	SYBR	None	16.418	16.4397	0.129033	1	20	4.32193	FALSE	20000	TRUE	3	6	86.9079	77.8115			N	Y
C4		Sox2	STANDARD	SYBR	None	19.296	19.0815	0.296213	0.1	2	1	FALSE	20000	TRUE	3	11	86.9058	77.6595			N	Y
C5		Sox2	STANDARD	SYBR	None	18.7435	19.0815	0.296213	0.1	2	1	FALSE	20000	TRUE	3	7	86.9079	77.6624			N	Y
C6		Sox2	STANDARD	SYBR	None	19.205	19.0815	0.296213	0.1	2	1	FALSE	20000	TRUE	3	7	86.9079	77.8115			N	Y
D4		Sox2	STANDARD	SYBR	None	23.1727	22.7043	0.483446	0.01	0.2	-2.32193	FALSE	20000	TRUE	3	14	86.7567	77.5103			N	Y
D5		Sox2	STANDARD	SYBR	None	22.7332	22.7043	0.483446	0.01	0.2	-2.32193	FALSE	20000	TRUE	3	12	86.9079	77.6624			N	Y
D6		Sox2	STANDARD	SYBR	None	22.2071	22.7043	0.483446	0.01	0.2	-2.32193	FALSE	20000	TRUE	3	12	86.9079	77.8115			N	Y
E4		Sox2	STANDARD	SYBR	None	26.7126	27.6332	1.02163	0.001	0.02	-5.64386	FALSE	20000	TRUE	3	16	78.1069	86.9058			Y	Y
E5		Sox2	STANDARD	SYBR	None	27.4547	27.6332	1.02163	0.001	0.02	-5.64386	FALSE	20000	TRUE	3	18	77.9606	86.9079			Y	Y
E6		Sox2	STANDARD	SYBR	None	28.7323	27.6332	1.02163	0.001	0.02	-5.64386	FALSE	20000	TRUE	3	18	77.9606	86.9079			Y	Y
F4		Sox2	STANDARD	SYBR	None	33.6216	33.6953	0.0638157	0.0001	0.002	-8.96578	FALSE	20000	TRUE	3	25	77.9577	86.9058			N	Y
F5		Sox2	STANDARD	SYBR	None	33.7294	33.6953	0.0638157	0.0001	0.002	-8.96578	FALSE	20000	TRUE	3	21	86.9079	76.9167			N	Y
F6		Sox2	STANDARD	SYBR	None	33.7347	33.6953	0.0638157	0.0001	0.002	-8.96578	FALSE	20000	TRUE	3	22	77.9606	87.057			N	Y
G4		Sox2	STANDARD	SYBR	None	26.0021	25.988	0.0477403	1e-05	0.0002	-12.2877	FALSE	20000	TRUE	3	15	86.9058	77.6595			N	Y
G5		Sox2	STANDARD	SYBR	None	25.9348	25.988	0.0477403	1e-05	0.0002	-12.2877	FALSE	20000	TRUE	3	15	87.057	77.6624			N	Y
G6		Sox2	STANDARD	SYBR	None	26.027	25.988	0.0477403	1e-05	0.0002	-12.2877	FALSE	20000	TRUE	3	13	87.057	77.8115			N	Y
																	log2(pM)	Cт
																	7.64386	13.2288
														= 103266e-0.714x			7.64386	12.6514
																	7.64386	12.8998
																	4.32193	16.5782
																	4.32193	16.3229
																	4.32193	16.418
																	1	19.296
																	1	18.7435
																	1	19.205
																	-2.32193	23.1727
																	-2.32193	22.7332
																	-2.32193	22.2071
																	-5.64386	26.7126
																	-5.64386	27.4547
																	-5.64386	28.7323

## Sheet: Olig2 Std
Well	Sample Name	Target Name	Task	Reporter	Quencher	Cт	Cт Mean	Cт SD	Quantity	Starting Quantity (pM)	log2(pM)	Automatic Ct Threshold	Ct Threshold	Automatic Baseline	Baseline Start	Baseline End	Tm1	Tm2	Tm3	Comments	HIGHSD	MTP
A1		Olig2	STANDARD	SYBR	None	9.71638	9.7028	0.29186	10	200	7.64386	FALSE	20000	TRUE	1	2	80.6442				N	N
A2		Olig2	STANDARD	SYBR	None	9.40438	9.7028	0.29186	10	200	7.64386	FALSE	20000	TRUE	1	2	80.6442				N	N
A3		Olig2	STANDARD	SYBR	None	9.98763	9.7028	0.29186	10	200	7.64386	FALSE	20000	TRUE	1	2	80.3439				N	N
B1		Olig2	STANDARD	SYBR	None	12.6757	12.6918	0.0959789	1	20	4.32193	FALSE	20000	TRUE	1	2	80.4951				N	N
B2		Olig2	STANDARD	SYBR	None	12.6049	12.6918	0.0959789	1	20	4.32193	FALSE	20000	TRUE	1	2	80.4951				N	N
B3		Olig2	STANDARD	SYBR	None	12.7948	12.6918	0.0959789	1	20	4.32193	FALSE	20000	TRUE	1	2	80.3439				N	N
C1		Olig2	STANDARD	SYBR	None	15.9707	15.9003	0.104108	0.1	2	1	FALSE	20000	TRUE	3	7	80.3459				N	N
C2		Olig2	STANDARD	SYBR	None	15.7807	15.9003	0.104108	0.1	2	1	FALSE	20000	TRUE	3	6	80.3459				N	N
C3		Olig2	STANDARD	SYBR	None	15.9495	15.9003	0.104108	0.1	2	1	FALSE	20000	TRUE	3	5	80.1948				N	N
D1		Olig2	STANDARD	SYBR	None	18.9492	19.1872	0.214669	0.01	0.2	-2.32193	FALSE	20000	TRUE	3	9	80.1968				N	N
D2		Olig2	STANDARD	SYBR	None	19.3661	19.1872	0.214669	0.01	0.2	-2.32193	FALSE	20000	TRUE	3	9	80.1968				N	N
D3		Olig2	STANDARD	SYBR	None	19.2463	19.1872	0.214669	0.01	0.2	-2.32193	FALSE	20000	TRUE	3	8	80.1948				N	N
E1		Olig2	STANDARD	SYBR	None	22.6045	22.6941	0.16365	0.001	0.02	-5.64386	FALSE	20000	TRUE	3	11	80.1968				N	N
E2		Olig2	STANDARD	SYBR	None	22.883	22.6941	0.16365	0.001	0.02	-5.64386	FALSE	20000	TRUE	3	13	80.0477				N	N
E3		Olig2	STANDARD	SYBR	None	22.5949	22.6941	0.16365	0.001	0.02	-5.64386	FALSE	20000	TRUE	3	12	80.0456				N	N
F1		Olig2	STANDARD	SYBR	None	25.9797	26.058	0.225538	0.0001	0.002	-8.96578	FALSE	20000	TRUE	3	18	80.0477				N	N
F2		Olig2	STANDARD	SYBR	None	25.882	26.058	0.225538	0.0001	0.002	-8.96578	FALSE	20000	TRUE	3	14	80.0477				N	N
F3		Olig2	STANDARD	SYBR	None	26.3122	26.058	0.225538	0.0001	0.002	-8.96578	FALSE	20000	TRUE	3	14	80.0456				N	N
G1		Olig2	STANDARD	SYBR	None	26.7857	27.6725	0.778349	1e-05	0.0002	-12.2877	FALSE	20000	TRUE	3	17	80.0477				Y	N
G2		Olig2	STANDARD	SYBR	None	28.2426	27.6725	0.778349	1e-05	0.0002	-12.2877	FALSE	20000	TRUE	3	16	79.8986				Y	N
G3		Olig2	STANDARD	SYBR	None	27.9892	27.6725	0.778349	1e-05	0.0002	-12.2877	FALSE	20000	TRUE	3	16	80.0456				Y	N
			log2(pM)	Cт
			7.64386	9.71638
			7.64386	9.40438
			7.64386	9.98763
			4.32193	12.6757
			4.32193	12.6049
			4.32193	12.7948
			1	15.9707
			1	15.7807
			1	15.9495
			-2.32193	18.9492
			-2.32193	19.3661
			-2.32193	19.2463
			-5.64386	22.6045
			-5.64386	22.883
			-5.64386	22.5949
			-8.96578	25.9797
			-8.96578	25.882
			-8.96578	26.3122
			-12.2877	26.7857
			-12.2877	28.2426
			-12.2877	27.9892

## Sheet: Melt Region Temperature Data
Block Type	96well
Chemistry	SYBR_GREEN
Experiment File Name	D:\Applied Biosystems\StepOne Software v2.3\experiments\JB\12_4_YY1_KD_Exp6_JB_Olig2_Sox2.eds
Experiment Run End Time	2016-12-04 20:36:07 PM PST
Instrument Type	steponeplus
Passive Reference
Well	Well Location	Target	Reporter Dye	Reading 1	Reading 2	Reading 3	Reading 4	Reading 5	Reading 6	Reading 7	Reading 8	Reading 9	Reading 10	Reading 11	Reading 12	Reading 13	Reading 14	Reading 15	Reading 16	Reading 17	Reading 18	Reading 19	Reading 20	Reading 21	Reading 22	Reading 23	Reading 24	Reading 25	Reading 26	Reading 27	Reading 28	Reading 29	Reading 30	Reading 31	Reading 32	Reading 33	Reading 34	Reading 35	Reading 36	Reading 37	Reading 38	Reading 39	Reading 40	Reading 41	Reading 42	Reading 43	Reading 44	Reading 45	Reading 46
1	A1	Olig2	SYBR	60.2142	60.5455	60.8405	61.1464	61.4431	61.7336	62.0583	62.2212	62.6451	62.938	63.254	63.5547	63.8415	64.1523	64.4437	64.7424	65.0581	65.3613	65.6538	65.952	66.2539	66.5404	66.8465	67.1513	67.4405	67.7488	68.0498	68.3446	68.6492	68.9514	69.2348	69.5361	69.8427	70.1518	70.4523	70.7302	71.0441	71.3665	71.6399	71.956	72.2519	72.5473	72.8416	73.1338	73.4486	73.7556
2	A2	Olig2	SYBR	60.2142	60.5455	60.8405	61.1464	61.4431	61.7336	62.0583	62.2212	62.6451	62.938	63.254	63.5547	63.8415	64.1523	64.4437	64.7424	65.0581	65.3613	65.6538	65.952	66.2539	66.5404	66.8465	67.1513	67.4405	67.7488	68.0498	68.3446	68.6492	68.9514	69.2348	69.5361	69.8427	70.1518	70.4523	70.7302	71.0441	71.3665	71.6399	71.956	72.2519	72.5473	72.8416	73.1338	73.4486	73.7556
3	A3	Olig2	SYBR	60.2107	60.537	60.8352	61.1489	61.4376	61.7334	62.0493	62.2244	62.6362	62.9312	63.2511	63.5504	63.8371	64.1504	64.4421	64.7392	65.049	65.3523	65.6474	65.9486	66.2478	66.5352	66.8394	67.1426	67.436	67.7453	68.0429	68.3355	68.6437	68.9473	69.2262	69.5293	69.8375	70.1503	70.4473	70.7239	71.0355	71.3554	71.6317	71.9535	72.2525	72.5428	72.8352	73.126	73.4389	73.7478
4	A4	Sox2	SYBR	60.2107	60.537	60.8352	61.1489	61.4376	61.7334	62.0493	62.2244	62.6362	62.9312	63.2511	63.5504	63.8371	64.1504	64.4421	64.7392	65.049	65.3523	65.6474	65.9486	66.2478	66.5352	66.8394	67.1426	67.436	67.7453	68.0429	68.3355	68.6437	68.9473	69.2262	69.5293	69.8375	70.1503	70.4473	70.7239	71.0355	71.3554	71.6317	71.9535	72.2525	72.5428	72.8352	73.126	73.4389	73.7478
5	A5	Sox2	SYBR	60.2151	60.5421	60.8429	61.1456	61.4435	61.7327	62.0515	62.2239	62.646	62.9364	63.2576	63.5516	63.8417	64.1517	64.441	64.7386	65.0549	65.3555	65.6526	65.9528	66.2525	66.5365	66.8385	67.1476	67.441	67.748	68.045	68.3428	68.6475	68.9501	69.2335	69.5353	69.8433	70.1498	70.4489	70.7275	71.0365	71.3587	71.6391	71.9498	72.2515	72.5439	72.8373	73.1285	73.4433	73.7476
6	A6	Sox2	SYBR	60.2151	60.5421	60.8429	61.1456	61.4435	61.7327	62.0515	62.2239	62.646	62.9364	63.2576	63.5516	63.8417	64.1517	64.441	64.7386	65.0549	65.3555	65.6526	65.9528	66.2525	66.5365	66.8385	67.1476	67.441	67.748	68.045	68.3428	68.6475	68.9501	69.2335	69.5353	69.8433	70.1498	70.4489	70.7275	71.0365	71.3587	71.6391	71.9498	72.2515	72.5439	72.8373	73.1285	73.4433	73.7476
7	A7	Olig2	SYBR	60.2139	60.5449	60.8415	61.1536	61.4447	61.7409	62.0571	62.2189	62.6437	62.9371	63.2545	63.5553	63.844	64.1554	64.4507	64.7477	65.0571	65.3614	65.6553	65.9552	66.2525	66.5385	66.8451	67.1513	67.444	67.7541	68.0524	68.3463	68.6513	68.9513	69.2362	69.5379	69.8447	70.1537	70.4525	70.7321	71.0421	71.3602	71.6439	71.9538	72.2534	72.547	72.8422	73.1335	73.4477	73.753
8	A8	Olig2	SYBR	60.2139	60.5449	60.8415	61.1536	61.4447	61.7409	62.0571	62.2189	62.6437	62.9371	63.2545	63.5553	63.844	64.1554	64.4507	64.7477	65.0571	65.3614	65.6553	65.9552	66.2525	66.5385	66.8451	67.1513	67.444	67.7541	68.0524	68.3463	68.6513	68.9513	69.2362	69.5379	69.8447	70.1537	70.4525	70.7321	71.0421	71.3602	71.6439	71.9538	72.2534	72.547	72.8422	73.1335	73.4477	73.753
9	A9	Olig2	SYBR	60.2151	60.5466	60.8417	61.1546	61.4436	61.7416	62.0565	62.2279	62.6443	62.9368	63.2551	63.5564	63.8431	64.1535	64.4468	64.7441	65.0551	65.3605	65.6557	65.9528	66.2546	66.5411	66.8452	67.1493	67.4433	67.7528	68.0499	68.3445	68.6492	68.9488	69.2355	69.5366	69.8441	70.1525	70.4489	70.7257	71.0433	71.3622	71.642	71.9536	72.2575	72.5481	72.8444	73.1352	73.4477	73.7503
10	A10	Olig2	SYBR	60.2151	60.5466	60.8417	61.1546	61.4436	61.7416	62.0565	62.2279	62.6443	62.9368	63.2551	63.5564	63.8431	64.1535	64.4468	64.7441	65.0551	65.3605	65.6557	65.9528	66.2546	66.5411	66.8452	67.1493	67.4433	67.7528	68.0499	68.3445	68.6492	68.9488	69.2355	69.5366	69.8441	70.1525	70.4489	70.7257	71.0433	71.3622	71.642	71.9536	72.2575	72.5481	72.8444	73.1352	73.4477	73.7503
11	A11	Sox2	SYBR	60.2108	60.5402	60.8407	61.1565	61.446	61.7374	62.0558	62.2184	62.6411	62.9381	63.2596	63.5567	63.8445	64.1543	64.4514	64.746	65.0557	65.3618	65.6501	65.9517	66.2544	66.5402	66.8458	67.1517	67.4469	67.7587	68.0492	68.345	68.6517	68.9521	69.2345	69.5385	69.8494	70.1562	70.4549	70.7298	71.0422	71.3674	71.644	71.9566	72.258	72.5501	72.8401	73.1324	73.4477	73.7519
12	A12	Sox2	SYBR	60.2108	60.5402	60.8407	61.1565	61.446	61.7374	62.0558	62.2184	62.6411	62.9381	63.2596	63.5567	63.8445	64.1543	64.4514	64.746	65.0557	65.3618	65.6501	65.9517	66.2544	66.5402	66.8458	67.1517	67.4469	67.7587	68.0492	68.345	68.6517	68.9521	69.2345	69.5385	69.8494	70.1562	70.4549	70.7298	71.0422	71.3674	71.644	71.9566	72.258	72.5501	72.8401	73.1324	73.4477	73.7519
13	B1	Olig2	SYBR	60.2142	60.5455	60.8405	61.1464	61.4431	61.7336	62.0583	62.2212	62.6451	62.938	63.254	63.5547	63.8415	64.1523	64.4437	64.7424	65.0581	65.3613	65.6538	65.952	66.2539	66.5404	66.8465	67.1513	67.4405	67.7488	68.0498	68.3446	68.6492	68.9514	69.2348	69.5361	69.8427	70.1518	70.4523	70.7302	71.0441	71.3665	71.6399	71.956	72.2519	72.5473	72.8416	73.1338	73.4486	73.7556
14	B2	Olig2	SYBR	60.2142	60.5455	60.8405	61.1464	61.4431	61.7336	62.0583	62.2212	62.6451	62.938	63.254	63.5547	63.8415	64.1523	64.4437	64.7424	65.0581	65.3613	65.6538	65.952	66.2539	66.5404	66.8465	67.1513	67.4405	67.7488	68.0498	68.3446	68.6492	68.9514	69.2348	69.5361	69.8427	70.1518	70.4523	70.7302	71.0441	71.3665	71.6399	71.956	72.2519	72.5473	72.8416	73.1338	73.4486	73.7556
15	B3	Olig2	SYBR	60.2107	60.537	60.8352	61.1489	61.4376	61.7334	62.0493	62.2244	62.6362	62.9312	63.2511	63.5504	63.8371	64.1504	64.4421	64.7392	65.049	65.3523	65.6474	65.9486	66.2478	66.5352	66.8394	67.1426	67.436	67.7453	68.0429	68.3355	68.6437	68.9473	69.2262	69.5293	69.8375	70.1503	70.4473	70.7239	71.0355	71.3554	71.6317	71.9535	72.2525	72.5428	72.8352	73.126	73.4389	73.7478
16	B4	Sox2	SYBR	60.2107	60.537	60.8352	61.1489	61.4376	61.7334	62.0493	62.2244	62.6362	62.9312	63.2511	63.5504	63.8371	64.1504	64.4421	64.7392	65.049	65.3523	65.6474	65.9486	66.2478	66.5352	66.8394	67.1426	67.436	67.7453	68.0429	68.3355	68.6437	68.9473	69.2262	69.5293	69.8375	70.1503	70.4473	70.7239	71.0355	71.3554	71.6317	71.9535	72.2525	72.5428	72.8352	73.126	73.4389	73.7478
17	B5	Sox2	SYBR	60.2151	60.5421	60.8429	61.1456	61.4435	61.7327	62.0515	62.2239	62.646	62.9364	63.2576	63.5516	63.8417	64.1517	64.441	64.7386	65.0549	65.3555	65.6526	65.9528	66.2525	66.5365	66.8385	67.1476	67.441	67.748	68.045	68.3428	68.6475	68.9501	69.2335	69.5353	69.8433	70.1498	70.4489	70.7275	71.0365	71.3587	71.6391	71.9498	72.2515	72.5439	72.8373	73.1285	73.4433	73.7476
18	B6	Sox2	SYBR	60.2151	60.5421	60.8429	61.1456	61.4435	61.7327	62.0515	62.2239	62.646	62.9364	63.2576	63.5516	63.8417	64.1517	64.441	64.7386	65.0549	65.3555	65.6526	65.9528	66.2525	66.5365	66.8385	67.1476	67.441	67.748	68.045	68.3428	68.6475	68.9501	69.2335	69.5353	69.8433	70.1498	70.4489	70.7275	71.0365	71.3587	71.6391	71.9498	72.2515	72.5439	72.8373	73.1285	73.4433	73.7476
19	B7	Olig2	SYBR	60.2139	60.5449	60.8415	61.1536	61.4447	61.7409	62.0571	62.2189	62.6437	62.9371	63.2545	63.5553	63.844	64.1554	64.4507	64.7477	65.0571	65.3614	65.6553	65.9552	66.2525	66.5385	66.8451	67.1513	67.444	67.7541	68.0524	68.3463	68.6513	68.9513	69.2362	69.5379	69.8447	70.1537	70.4525	70.7321	71.0421	71.3602	71.6439	71.9538	72.2534	72.547	72.8422	73.1335	73.4477	73.753
20	B8	Olig2	SYBR	60.2139	60.5449	60.8415	61.1536	61.4447	61.7409	62.0571	62.2189	62.6437	62.9371	63.2545	63.5553	63.844	64.1554	64.4507	64.7477	65.0571	65.3614	65.6553	65.9552	66.2525	66.5385	66.8451	67.1513	67.444	67.7541	68.0524	68.3463	68.6513	68.9513	69.2362	69.5379	69.8447	70.1537	70.4525	70.7321	71.0421	71.3602	71.6439	71.9538	72.2534	72.547	72.8422	73.1335	73.4477	73.753
21	B9	Olig2	SYBR	60.2151	60.5466	60.8417	61.1546	61.4436	61.7416	62.0565	62.2279	62.6443	62.9368	63.2551	63.5564	63.8431	64.1535	64.4468	64.7441	65.0551	65.3605	65.6557	65.9528	66.2546	66.5411	66.8452	67.1493	67.4433	67.7528	68.0499	68.3445	68.6492	68.9488	69.2355	69.5366	69.8441	70.1525	70.4489	70.7257	71.0433	71.3622	71.642	71.9536	72.2575	72.5481	72.8444	73.1352	73.4477	73.7503
22	B10	Olig2	SYBR	60.2151	60.5466	60.8417	61.1546	61.4436	61.7416	62.0565	62.2279	62.6443	62.9368	63.2551	63.5564	63.8431	64.1535	64.4468	64.7441	65.0551	65.3605	65.6557	65.9528	66.2546	66.5411	66.8452	67.1493	67.4433	67.7528	68.0499	68.3445	68.6492	68.9488	69.2355	69.5366	69.8441	70.1525	70.4489	70.7257	71.0433	71.3622	71.642	71.9536	72.2575	72.5481	72.8444	73.1352	73.4477	73.7503
23	B11	Sox2	SYBR	60.2108	60.5402	60.8407	61.1565	61.446	61.7374	62.0558	62.2184	62.6411	62.9381	63.2596	63.5567	63.8445	64.1543	64.4514	64.746	65.0557	65.3618	65.6501	65.9517	66.2544	66.5402	66.8458	67.1517	67.4469	67.7587	68.0492	68.345	68.6517	68.9521	69.2345	69.5385	69.8494	70.1562	70.4549	70.7298	71.0422	71.3674	71.644	71.9566	72.258	72.5501	72.8401	73.1324	73.4477	73.7519
24	B12	Sox2	SYBR	60.2108	60.5402	60.8407	61.1565	61.446	61.7374	62.0558	62.2184	62.6411	62.9381	63.2596	63.5567	63.8445	64.1543	64.4514	64.746	65.0557	65.3618	65.6501	65.9517	66.2544	66.5402	66.8458	67.1517	67.4469	67.7587	68.0492	68.345	68.6517	68.9521	69.2345	69.5385	69.8494	70.1562	70.4549	70.7298	71.0422	71.3674	71.644	71.9566	72.258	72.5501	72.8401	73.1324	73.4477	73.7519
25	C1	Olig2	SYBR	60.2142	60.5455	60.8405	61.1464	61.4431	61.7336	62.0583	62.2212	62.6451	62.938	63.254	63.5547	63.8415	64.1523	64.4437	64.7424	65.0581	65.3613	65.6538	65.952	66.2539	66.5404	66.8465	67.1513	67.4405	67.7488	68.0498	68.3446	68.6492	68.9514	69.2348	69.5361	69.8427	70.1518	70.4523	70.7302	71.0441	71.3665	71.6399	71.956	72.2519	72.5473	72.8416	73.1338	73.4486	73.7556
26	C2	Olig2	SYBR	60.2142	60.5455	60.8405	61.1464	61.4431	61.7336	62.0583	62.2212	62.6451	62.938	63.254	63.5547	63.8415	64.1523	64.4437	64.7424	65.0581	65.3613	65.6538	65.952	66.2539	66.5404	66.8465	67.1513	67.4405	67.7488	68.0498	68.3446	68.6492	68.9514	69.2348	69.5361	69.8427	70.1518	70.4523	70.7302	71.0441	71.3665	71.6399	71.956	72.2519	72.5473	72.8416	73.1338	73.4486	73.7556
27	C3	Olig2	SYBR	60.2107	60.537	60.8352	61.1489	61.4376	61.7334	62.0493	62.2244	62.6362	62.9312	63.2511	63.5504	63.8371	64.1504	64.4421	64.7392	65.049	65.3523	65.6474	65.9486	66.2478	66.5352	66.8394	67.1426	67.436	67.7453	68.0429	68.3355	68.6437	68.9473	69.2262	69.5293	69.8375	70.1503	70.4473	70.7239	71.0355	71.3554	71.6317	71.9535	72.2525	72.5428	72.8352	73.126	73.4389	73.7478
28	C4	Sox2	SYBR	60.2107	60.537	60.8352	61.1489	61.4376	61.7334	62.0493	62.2244	62.6362	62.9312	63.2511	63.5504	63.8371	64.1504	64.4421	64.7392	65.049	65.3523	65.6474	65.9486	66.2478	66.5352	66.8394	67.1426	67.436	67.7453	68.0429	68.3355	68.6437	68.9473	69.2262	69.5293	69.8375	70.1503	70.4473	70.7239	71.0355	71.3554	71.6317	71.9535	72.2525	72.5428	72.8352	73.126	73.4389	73.7478
29	C5	Sox2	SYBR	60.2151	60.5421	60.8429	61.1456	61.4435	61.7327	62.0515	62.2239	62.646	62.9364	63.2576	63.5516	63.8417	64.1517	64.441	64.7386	65.0549	65.3555	65.6526	65.9528	66.2525	66.5365	66.8385	67.1476	67.441	67.748	68.045	68.3428	68.6475	68.9501	69.2335	69.5353	69.8433	70.1498	70.4489	70.7275	71.0365	71.3587	71.6391	71.9498	72.2515	72.5439	72.8373	73.1285	73.4433	73.7476
30	C6	Sox2	SYBR	60.2151	60.5421	60.8429	61.1456	61.4435	61.7327	62.0515	62.2239	62.646	62.9364	63.2576	63.5516	63.8417	64.1517	64.441	64.7386	65.0549	65.3555	65.6526	65.9528	66.2525	66.5365	66.8385	67.1476	67.441	67.748	68.045	68.3428	68.6475	68.9501	69.2335	69.5353	69.8433	70.1498	70.4489	70.7275	71.0365	71.3587	71.6391	71.9498	72.2515	72.5439	72.8373	73.1285	73.4433	73.7476
31	C7	Olig2	SYBR	60.2139	60.5449	60.8415	61.1536	61.4447	61.7409	62.0571	62.2189	62.6437	62.9371	63.2545	63.5553	63.844	64.1554	64.4507	64.7477	65.0571	65.3614	65.6553	65.9552	66.2525	66.5385	66.8451	67.1513	67.444	67.7541	68.0524	68.3463	68.6513	68.9513	69.2362	69.5379	69.8447	70.1537	70.4525	70.7321	71.0421	71.3602	71.6439	71.9538	72.2534	72.547	72.8422	73.1335	73.4477	73.753
32	C8	Olig2	SYBR	60.2139	60.5449	60.8415	61.1536	61.4447	61.7409	62.0571	62.2189	62.6437	62.9371	63.2545	63.5553	63.844	64.1554	64.4507	64.7477	65.0571	65.3614	65.6553	65.9552	66.2525	66.5385	66.8451	67.1513	67.444	67.7541	68.0524	68.3463	68.6513	68.9513	69.2362	69.5379	69.8447	70.1537	70.4525	70.7321	71.0421	71.3602	71.6439	71.9538	72.2534	72.547	72.8422	73.1335	73.4477	73.753
33	C9	Olig2	SYBR	60.2151	60.5466	60.8417	61.1546	61.4436	61.7416	62.0565	62.2279	62.6443	62.9368	63.2551	63.5564	63.8431	64.1535	64.4468	64.7441	65.0551	65.3605	65.6557	65.9528	66.2546	66.5411	66.8452	67.1493	67.4433	67.7528	68.0499	68.3445	68.6492	68.9488	69.2355	69.5366	69.8441	70.1525	70.4489	70.7257	71.0433	71.3622	71.642	71.9536	72.2575	72.5481	72.8444	73.1352	73.4477	73.7503
34	C10	Olig2	SYBR	60.2151	60.5466	60.8417	61.1546	61.4436	61.7416	62.0565	62.2279	62.6443	62.9368	63.2551	63.5564	63.8431	64.1535	64.4468	64.7441	65.0551	65.3605	65.6557	65.9528	66.2546	66.5411	66.8452	67.1493	67.4433	67.7528	68.0499	68.3445	68.6492	68.9488	69.2355	69.5366	69.8441	70.1525	70.4489	70.7257	71.0433	71.3622	71.642	71.9536	72.2575	72.5481	72.8444	73.1352	73.4477	73.7503
35	C11	Sox2	SYBR	60.2108	60.5402	60.8407	61.1565	61.446	61.7374	62.0558	62.2184	62.6411	62.9381	63.2596	63.5567	63.8445	64.1543	64.4514	64.746	65.0557	65.3618	65.6501	65.9517	66.2544	66.5402	66.8458	67.1517	67.4469	67.7587	68.0492	68.345	68.6517	68.9521	69.2345	69.5385	69.8494	70.1562	70.4549	70.7298	71.0422	71.3674	71.644	71.9566	72.258	72.5501	72.8401	73.1324	73.4477	73.7519
36	C12	Sox2	SYBR	60.2108	60.5402	60.8407	61.1565	61.446	61.7374	62.0558	62.2184	62.6411	62.9381	63.2596	63.5567	63.8445	64.1543	64.4514	64.746	65.0557	65.3618	65.6501	65.9517	66.2544	66.5402	66.8458	67.1517	67.4469	67.7587	68.0492	68.345	68.6517	68.9521	69.2345	69.5385	69.8494	70.1562	70.4549	70.7298	71.0422	71.3674	71.644	71.9566	72.258	72.5501	72.8401	73.1324	73.4477	73.7519
37	D1	Olig2	SYBR	60.2142	60.5455	60.8405	61.1464	61.4431	61.7336	62.0583	62.2212	62.6451	62.938	63.254	63.5547	63.8415	64.1523	64.4437	64.7424	65.0581	65.3613	65.6538	65.952	66.2539	66.5404	66.8465	67.1513	67.4405	67.7488	68.0498	68.3446	68.6492	68.9514	69.2348	69.5361	69.8427	70.1518	70.4523	70.7302	71.0441	71.3665	71.6399	71.956	72.2519	72.5473	72.8416	73.1338	73.4486	73.7556
38	D2	Olig2	SYBR	60.2142	60.5455	60.8405	61.1464	61.4431	61.7336	62.0583	62.2212	62.6451	62.938	63.254	63.5547	63.8415	64.1523	64.4437	64.7424	65.0581	65.3613	65.6538	65.952	66.2539	66.5404	66.8465	67.1513	67.4405	67.7488	68.0498	68.3446	68.6492	68.9514	69.2348	69.5361	69.8427	70.1518	70.4523	70.7302	71.0441	71.3665	71.6399	71.956	72.2519	72.5473	72.8416	73.1338	73.4486	73.7556
39	D3	Olig2	SYBR	60.2107	60.537	60.8352	61.1489	61.4376	61.7334	62.0493	62.2244	62.6362	62.9312	63.2511	63.5504	63.8371	64.1504	64.4421	64.7392	65.049	65.3523	65.6474	65.9486	66.2478	66.5352	66.8394	67.1426	67.436	67.7453	68.0429	68.3355	68.6437	68.9473	69.2262	69.5293	69.8375	70.1503	70.4473	70.7239	71.0355	71.3554	71.6317	71.9535	72.2525	72.5428	72.8352	73.126	73.4389	73.7478
40	D4	Sox2	SYBR	60.2107	60.537	60.8352	61.1489	61.4376	61.7334	62.0493	62.2244	62.6362	62.9312	63.2511	63.5504	63.8371	64.1504	64.4421	64.7392	65.049	65.3523	65.6474	65.9486	66.2478	66.5352	66.8394	67.1426	67.436	67.7453	68.0429	68.3355	68.6437	68.9473	69.2262	69.5293	69.8375	70.1503	70.4473	70.7239	71.0355	71.3554	71.6317	71.9535	72.2525	72.5428	72.8352	73.126	73.4389	73.7478
41	D5	Sox2	SYBR	60.2151	60.5421	60.8429	61.1456	61.4435	61.7327	62.0515	62.2239	62.646	62.9364	63.2576	63.5516	63.8417	64.1517	64.441	64.7386	65.0549	65.3555	65.6526	65.9528	66.2525	66.5365	66.8385	67.1476	67.441	67.748	68.045	68.3428	68.6475	68.9501	69.2335	69.5353	69.8433	70.1498	70.4489	70.7275	71.0365	71.3587	71.6391	71.9498	72.2515	72.5439	72.8373	73.1285	73.4433	73.7476
42	D6	Sox2	SYBR	60.2151	60.5421	60.8429	61.1456	61.4435	61.7327	62.0515	62.2239	62.646	62.9364	63.2576	63.5516	63.8417	64.1517	64.441	64.7386	65.0549	65.3555	65.6526	65.9528	66.2525	66.5365	66.8385	67.1476	67.441	67.748	68.045	68.3428	68.6475	68.9501	69.2335	69.5353	69.8433	70.1498	70.4489	70.7275	71.0365	71.3587	71.6391	71.9498	72.2515	72.5439	72.8373	73.1285	73.4433	73.7476
43	D7	Olig2	SYBR	60.2139	60.5449	60.8415	61.1536	61.4447	61.7409	62.0571	62.2189	62.6437	62.9371	63.2545	63.5553	63.844	64.1554	64.4507	64.7477	65.0571	65.3614	65.6553	65.9552	66.2525	66.5385	66.8451	67.1513	67.444	67.7541	68.0524	68.3463	68.6513	68.9513	69.2362	69.5379	69.8447	70.1537	70.4525	70.7321	71.0421	71.3602	71.6439	71.9538	72.2534	72.547	72.8422	73.1335	73.4477	73.753
44	D8	Olig2	SYBR	60.2139	60.5449	60.8415	61.1536	61.4447	61.7409	62.0571	62.2189	62.6437	62.9371	63.2545	63.5553	63.844	64.1554	64.4507	64.7477	65.0571	65.3614	65.6553	65.9552	66.2525	66.5385	66.8451	67.1513	67.444	67.7541	68.0524	68.3463	68.6513	68.9513	69.2362	69.5379	69.8447	70.1537	70.4525	70.7321	71.0421	71.3602	71.6439	71.9538	72.2534	72.547	72.8422	73.1335	73.4477	73.753
45	D9	Olig2	SYBR	60.2151	60.5466	60.8417	61.1546	61.4436	61.7416	62.0565	62.2279	62.6443	62.9368	63.2551	63.5564	63.8431	64.1535	64.4468	64.7441	65.0551	65.3605	65.6557	65.9528	66.2546	66.5411	66.8452	67.1493	67.4433	67.7528	68.0499	68.3445	68.6492	68.9488	69.2355	69.5366	69.8441	70.1525	70.4489	70.7257	71.0433	71.3622	71.642	71.9536	72.2575	72.5481	72.8444	73.1352	73.4477	73.7503
46	D10	Olig2	SYBR	60.2151	60.5466	60.8417	61.1546	61.4436	61.7416	62.0565	62.2279	62.6443	62.9368	63.2551	63.5564	63.8431	64.1535	64.4468	64.7441	65.0551	65.3605	65.6557	65.9528	66.2546	66.5411	66.8452	67.1493	67.4433	67.7528	68.0499	68.3445	68.6492	68.9488	69.2355	69.5366	69.8441	70.1525	70.4489	70.7257	71.0433	71.3622	71.642	71.9536	72.2575	72.5481	72.8444	73.1352	73.4477	73.7503
47	D11	Sox2	SYBR	60.2108	60.5402	60.8407	61.1565	61.446	61.7374	62.0558	62.2184	62.6411	62.9381	63.2596	63.5567	63.8445	64.1543	64.4514	64.746	65.0557	65.3618	65.6501	65.9517	66.2544	66.5402	66.8458	67.1517	67.4469	67.7587	68.0492	68.345	68.6517	68.9521	69.2345	69.5385	69.8494	70.1562	70.4549	70.7298	71.0422	71.3674	71.644	71.9566	72.258	72.5501	72.8401	73.1324	73.4477	73.7519
48	D12	Sox2	SYBR	60.2108	60.5402	60.8407	61.1565	61.446	61.7374	62.0558	62.2184	62.6411	62.9381	63.2596	63.5567	63.8445	64.1543	64.4514	64.746	65.0557	65.3618	65.6501	65.9517	66.2544	66.5402	66.8458	67.1517	67.4469	67.7587	68.0492	68.345	68.6517	68.9521	69.2345	69.5385	69.8494	70.1562	70.4549	70.7298	71.0422	71.3674	71.644	71.9566	72.258	72.5501	72.8401	73.1324	73.4477	73.7519
49	E1	Olig2	SYBR	60.2142	60.5455	60.8405	61.1464	61.4431	61.7336	62.0583	62.2212	62.6451	62.938	63.254	63.5547	63.8415	64.1523	64.4437	64.7424	65.0581	65.3613	65.6538	65.952	66.2539	66.5404	66.8465	67.1513	67.4405	67.7488	68.0498	68.3446	68.6492	68.9514	69.2348	69.5361	69.8427	70.1518	70.4523	70.7302	71.0441	71.3665	71.6399	71.956	72.2519	72.5473	72.8416	73.1338	73.4486	73.7556
50	E2	Olig2	SYBR	60.2142	60.5455	60.8405	61.1464	61.4431	61.7336	62.0583	62.2212	62.6451	62.938	63.254	63.5547	63.8415	64.1523	64.4437	64.7424	65.0581	65.3613	65.6538	65.952	66.2539	66.5404	66.8465	67.1513	67.4405	67.7488	68.0498	68.3446	68.6492	68.9514	69.2348	69.5361	69.8427	70.1518	70.4523	70.7302	71.0441	71.3665	71.6399	71.956	72.2519	72.5473	72.8416	73.1338	73.4486	73.7556
51	E3	Olig2	SYBR	60.2107	60.537	60.8352	61.1489	61.4376	61.7334	62.0493	62.2244	62.6362	62.9312	63.2511	63.5504	63.8371	64.1504	64.4421	64.7392	65.049	65.3523	65.6474	65.9486	66.2478	66.5352	66.8394	67.1426	67.436	67.7453	68.0429	68.3355	68.6437	68.9473	69.2262	69.5293	69.8375	70.1503	70.4473	70.7239	71.0355	71.3554	71.6317	71.9535	72.2525	72.5428	72.8352	73.126	73.4389	73.7478
52	E4	Sox2	SYBR	60.2107	60.537	60.8352	61.1489	61.4376	61.7334	62.0493	62.2244	62.6362	62.9312	63.2511	63.5504	63.8371	64.1504	64.4421	64.7392	65.049	65.3523	65.6474	65.9486	66.2478	66.5352	66.8394	67.1426	67.436	67.7453	68.0429	68.3355	68.6437	68.9473	69.2262	69.5293	69.8375	70.1503	70.4473	70.7239	71.0355	71.3554	71.6317	71.9535	72.2525	72.5428	72.8352	73.126	73.4389	73.7478
53	E5	Sox2	SYBR	60.2151	60.5421	60.8429	61.1456	61.4435	61.7327	62.0515	62.2239	62.646	62.9364	63.2576	63.5516	63.8417	64.1517	64.441	64.7386	65.0549	65.3555	65.6526	65.9528	66.2525	66.5365	66.8385	67.1476	67.441	67.748	68.045	68.3428	68.6475	68.9501	69.2335	69.5353	69.8433	70.1498	70.4489	70.7275	71.0365	71.3587	71.6391	71.9498	72.2515	72.5439	72.8373	73.1285	73.4433	73.7476
54	E6	Sox2	SYBR	60.2151	60.5421	60.8429	61.1456	61.4435	61.7327	62.0515	62.2239	62.646	62.9364	63.2576	63.5516	63.8417	64.1517	64.441	64.7386	65.0549	65.3555	65.6526	65.9528	66.2525	66.5365	66.8385	67.1476	67.441	67.748	68.045	68.3428	68.6475	68.9501	69.2335	69.5353	69.8433	70.1498	70.4489	70.7275	71.0365	71.3587	71.6391	71.9498	72.2515	72.5439	72.8373	73.1285	73.4433	73.7476
55	E7	Olig2	SYBR	60.2139	60.5449	60.8415	61.1536	61.4447	61.7409	62.0571	62.2189	62.6437	62.9371	63.2545	63.5553	63.844	64.1554	64.4507	64.7477	65.0571	65.3614	65.6553	65.9552	66.2525	66.5385	66.8451	67.1513	67.444	67.7541	68.0524	68.3463	68.6513	68.9513	69.2362	69.5379	69.8447	70.1537	70.4525	70.7321	71.0421	71.3602	71.6439	71.9538	72.2534	72.547	72.8422	73.1335	73.4477	73.753
56	E8	Olig2	SYBR	60.2139	60.5449	60.8415	61.1536	61.4447	61.7409	62.0571	62.2189	62.6437	62.9371	63.2545	63.5553	63.844	64.1554	64.4507	64.7477	65.0571	65.3614	65.6553	65.9552	66.2525	66.5385	66.8451	67.1513	67.444	67.7541	68.0524	68.3463	68.6513	68.9513	69.2362	69.5379	69.8447	70.1537	70.4525	70.7321	71.0421	71.3602	71.6439	71.9538	72.2534	72.547	72.8422	73.1335	73.4477	73.753
57	E9	Sox2	SYBR	60.2151	60.5466	60.8417	61.1546	61.4436	61.7416	62.0565	62.2279	62.6443	62.9368	63.2551	63.5564	63.8431	64.1535	64.4468	64.7441	65.0551	65.3605	65.6557	65.9528	66.2546	66.5411	66.8452	67.1493	67.4433	67.7528	68.0499	68.3445	68.6492	68.9488	69.2355	69.5366	69.8441	70.1525	70.4489	70.7257	71.0433	71.3622	71.642	71.9536	72.2575	72.5481	72.8444	73.1352	73.4477	73.7503
58	E10	Sox2	SYBR	60.2151	60.5466	60.8417	61.1546	61.4436	61.7416	62.0565	62.2279	62.6443	62.9368	63.2551	63.5564	63.8431	64.1535	64.4468	64.7441	65.0551	65.3605	65.6557	65.9528	66.2546	66.5411	66.8452	67.1493	67.4433	67.7528	68.0499	68.3445	68.6492	68.9488	69.2355	69.5366	69.8441	70.1525	70.4489	70.7257	71.0433	71.3622	71.642	71.9536	72.2575	72.5481	72.8444	73.1352	73.4477	73.7503
59	E11	Sox2	SYBR	60.2108	60.5402	60.8407	61.1565	61.446	61.7374	62.0558	62.2184	62.6411	62.9381	63.2596	63.5567	63.8445	64.1543	64.4514	64.746	65.0557	65.3618	65.6501	65.9517	66.2544	66.5402	66.8458	67.1517	67.4469	67.7587	68.0492	68.345	68.6517	68.9521	69.2345	69.5385	69.8494	70.1562	70.4549	70.7298	71.0422	71.3674	71.644	71.9566	72.258	72.5501	72.8401	73.1324	73.4477	73.7519
60	E12	Sox2	SYBR	60.2108	60.5402	60.8407	61.1565	61.446	61.7374	62.0558	62.2184	62.6411	62.9381	63.2596	63.5567	63.8445	64.1543	64.4514	64.746	65.0557	65.3618	65.6501	65.9517	66.2544	66.5402	66.8458	67.1517	67.4469	67.7587	68.0492	68.345	68.6517	68.9521	69.2345	69.5385	69.8494	70.1562	70.4549	70.7298	71.0422	71.3674	71.644	71.9566	72.258	72.5501	72.8401	73.1324	73.4477	73.7519
61	F1	Olig2	SYBR	60.2142	60.5455	60.8405	61.1464	61.4431	61.7336	62.0583	62.2212	62.6451	62.938	63.254	63.5547	63.8415	64.1523	64.4437	64.7424	65.0581	65.3613	65.6538	65.952	66.2539	66.5404	66.8465	67.1513	67.4405	67.7488	68.0498	68.3446	68.6492	68.9514	69.2348	69.5361	69.8427	70.1518	70.4523	70.7302	71.0441	71.3665	71.6399	71.956	72.2519	72.5473	72.8416	73.1338	73.4486	73.7556
62	F2	Olig2	SYBR	60.2142	60.5455	60.8405	61.1464	61.4431	61.7336	62.0583	62.2212	62.6451	62.938	63.254	63.5547	63.8415	64.1523	64.4437	64.7424	65.0581	65.3613	65.6538	65.952	66.2539	66.5404	66.8465	67.1513	67.4405	67.7488	68.0498	68.3446	68.6492	68.9514	69.2348	69.5361	69.8427	70.1518	70.4523	70.7302	71.0441	71.3665	71.6399	71.956	72.2519	72.5473	72.8416	73.1338	73.4486	73.7556
63	F3	Olig2	SYBR	60.2107	60.537	60.8352	61.1489	61.4376	61.7334	62.0493	62.2244	62.6362	62.9312	63.2511	63.5504	63.8371	64.1504	64.4421	64.7392	65.049	65.3523	65.6474	65.9486	66.2478	66.5352	66.8394	67.1426	67.436	67.7453	68.0429	68.3355	68.6437	68.9473	69.2262	69.5293	69.8375	70.1503	70.4473	70.7239	71.0355	71.3554	71.6317	71.9535	72.2525	72.5428	72.8352	73.126	73.4389	73.7478
64	F4	Sox2	SYBR	60.2107	60.537	60.8352	61.1489	61.4376	61.7334	62.0493	62.2244	62.6362	62.9312	63.2511	63.5504	63.8371	64.1504	64.4421	64.7392	65.049	65.3523	65.6474	65.9486	66.2478	66.5352	66.8394	67.1426	67.436	67.7453	68.0429	68.3355	68.6437	68.9473	69.2262	69.5293	69.8375	70.1503	70.4473	70.7239	71.0355	71.3554	71.6317	71.9535	72.2525	72.5428	72.8352	73.126	73.4389	73.7478
65	F5	Sox2	SYBR	60.2151	60.5421	60.8429	61.1456	61.4435	61.7327	62.0515	62.2239	62.646	62.9364	63.2576	63.5516	63.8417	64.1517	64.441	64.7386	65.0549	65.3555	65.6526	65.9528	66.2525	66.5365	66.8385	67.1476	67.441	67.748	68.045	68.3428	68.6475	68.9501	69.2335	69.5353	69.8433	70.1498	70.4489	70.7275	71.0365	71.3587	71.6391	71.9498	72.2515	72.5439	72.8373	73.1285	73.4433	73.7476
66	F6	Sox2	SYBR	60.2151	60.5421	60.8429	61.1456	61.4435	61.7327	62.0515	62.2239	62.646	62.9364	63.2576	63.5516	63.8417	64.1517	64.441	64.7386	65.0549	65.3555	65.6526	65.9528	66.2525	66.5365	66.8385	67.1476	67.441	67.748	68.045	68.3428	68.6475	68.9501	69.2335	69.5353	69.8433	70.1498	70.4489	70.7275	71.0365	71.3587	71.6391	71.9498	72.2515	72.5439	72.8373	73.1285	73.4433	73.7476
67	F7	Olig2	SYBR	60.2139	60.5449	60.8415	61.1536	61.4447	61.7409	62.0571	62.2189	62.6437	62.9371	63.2545	63.5553	63.844	64.1554	64.4507	64.7477	65.0571	65.3614	65.6553	65.9552	66.2525	66.5385	66.8451	67.1513	67.444	67.7541	68.0524	68.3463	68.6513	68.9513	69.2362	69.5379	69.8447	70.1537	70.4525	70.7321	71.0421	71.3602	71.6439	71.9538	72.2534	72.547	72.8422	73.1335	73.4477	73.753
68	F8	Olig2	SYBR	60.2139	60.5449	60.8415	61.1536	61.4447	61.7409	62.0571	62.2189	62.6437	62.9371	63.2545	63.5553	63.844	64.1554	64.4507	64.7477	65.0571	65.3614	65.6553	65.9552	66.2525	66.5385	66.8451	67.1513	67.444	67.7541	68.0524	68.3463	68.6513	68.9513	69.2362	69.5379	69.8447	70.1537	70.4525	70.7321	71.0421	71.3602	71.6439	71.9538	72.2534	72.547	72.8422	73.1335	73.4477	73.753
69	F9	Sox2	SYBR	60.2151	60.5466	60.8417	61.1546	61.4436	61.7416	62.0565	62.2279	62.6443	62.9368	63.2551	63.5564	63.8431	64.1535	64.4468	64.7441	65.0551	65.3605	65.6557	65.9528	66.2546	66.5411	66.8452	67.1493	67.4433	67.7528	68.0499	68.3445	68.6492	68.9488	69.2355	69.5366	69.8441	70.1525	70.4489	70.7257	71.0433	71.3622	71.642	71.9536	72.2575	72.5481	72.8444	73.1352	73.4477	73.7503
70	F10	Sox2	SYBR	60.2151	60.5466	60.8417	61.1546	61.4436	61.7416	62.0565	62.2279	62.6443	62.9368	63.2551	63.5564	63.8431	64.1535	64.4468	64.7441	65.0551	65.3605	65.6557	65.9528	66.2546	66.5411	66.8452	67.1493	67.4433	67.7528	68.0499	68.3445	68.6492	68.9488	69.2355	69.5366	69.8441	70.1525	70.4489	70.7257	71.0433	71.3622	71.642	71.9536	72.2575	72.5481	72.8444	73.1352	73.4477	73.7503
71	F11	Sox2	SYBR	60.2108	60.5402	60.8407	61.1565	61.446	61.7374	62.0558	62.2184	62.6411	62.9381	63.2596	63.5567	63.8445	64.1543	64.4514	64.746	65.0557	65.3618	65.6501	65.9517	66.2544	66.5402	66.8458	67.1517	67.4469	67.7587	68.0492	68.345	68.6517	68.9521	69.2345	69.5385	69.8494	70.1562	70.4549	70.7298	71.0422	71.3674	71.644	71.9566	72.258	72.5501	72.8401	73.1324	73.4477	73.7519
72	F12	Sox2	SYBR	60.2108	60.5402	60.8407	61.1565	61.446	61.7374	62.0558	62.2184	62.6411	62.9381	63.2596	63.5567	63.8445	64.1543	64.4514	64.746	65.0557	65.3618	65.6501	65.9517	66.2544	66.5402	66.8458	67.1517	67.4469	67.7587	68.0492	68.345	68.6517	68.9521	69.2345	69.5385	69.8494	70.1562	70.4549	70.7298	71.0422	71.3674	71.644	71.9566	72.258	72.5501	72.8401	73.1324	73.4477	73.7519
73	G1	Olig2	SYBR	60.2142	60.5455	60.8405	61.1464	61.4431	61.7336	62.0583	62.2212	62.6451	62.938	63.254	63.5547	63.8415	64.1523	64.4437	64.7424	65.0581	65.3613	65.6538	65.952	66.2539	66.5404	66.8465	67.1513	67.4405	67.7488	68.0498	68.3446	68.6492	68.9514	69.2348	69.5361	69.8427	70.1518	70.4523	70.7302	71.0441	71.3665	71.6399	71.956	72.2519	72.5473	72.8416	73.1338	73.4486	73.7556
74	G2	Olig2	SYBR	60.2142	60.5455	60.8405	61.1464	61.4431	61.7336	62.0583	62.2212	62.6451	62.938	63.254	63.5547	63.8415	64.1523	64.4437	64.7424	65.0581	65.3613	65.6538	65.952	66.2539	66.5404	66.8465	67.1513	67.4405	67.7488	68.0498	68.3446	68.6492	68.9514	69.2348	69.5361	69.8427	70.1518	70.4523	70.7302	71.0441	71.3665	71.6399	71.956	72.2519	72.5473	72.8416	73.1338	73.4486	73.7556
75	G3	Olig2	SYBR	60.2107	60.537	60.8352	61.1489	61.4376	61.7334	62.0493	62.2244	62.6362	62.9312	63.2511	63.5504	63.8371	64.1504	64.4421	64.7392	65.049	65.3523	65.6474	65.9486	66.2478	66.5352	66.8394	67.1426	67.436	67.7453	68.0429	68.3355	68.6437	68.9473	69.2262	69.5293	69.8375	70.1503	70.4473	70.7239	71.0355	71.3554	71.6317	71.9535	72.2525	72.5428	72.8352	73.126	73.4389	73.7478
76	G4	Sox2	SYBR	60.2107	60.537	60.8352	61.1489	61.4376	61.7334	62.0493	62.2244	62.6362	62.9312	63.2511	63.5504	63.8371	64.1504	64.4421	64.7392	65.049	65.3523	65.6474	65.9486	66.2478	66.5352	66.8394	67.1426	67.436	67.7453	68.0429	68.3355	68.6437	68.9473	69.2262	69.5293	69.8375	70.1503	70.4473	70.7239	71.0355	71.3554	71.6317	71.9535	72.2525	72.5428	72.8352	73.126	73.4389	73.7478
77	G5	Sox2	SYBR	60.2151	60.5421	60.8429	61.1456	61.4435	61.7327	62.0515	62.2239	62.646	62.9364	63.2576	63.5516	63.8417	64.1517	64.441	64.7386	65.0549	65.3555	65.6526	65.9528	66.2525	66.5365	66.8385	67.1476	67.441	67.748	68.045	68.3428	68.6475	68.9501	69.2335	69.5353	69.8433	70.1498	70.4489	70.7275	71.0365	71.3587	71.6391	71.9498	72.2515	72.5439	72.8373	73.1285	73.4433	73.7476
78	G6	Sox2	SYBR	60.2151	60.5421	60.8429	61.1456	61.4435	61.7327	62.0515	62.2239	62.646	62.9364	63.2576	63.5516	63.8417	64.1517	64.441	64.7386	65.0549	65.3555	65.6526	65.9528	66.2525	66.5365	66.8385	67.1476	67.441	67.748	68.045	68.3428	68.6475	68.9501	69.2335	69.5353	69.8433	70.1498	70.4489	70.7275	71.0365	71.3587	71.6391	71.9498	72.2515	72.5439	72.8373	73.1285	73.4433	73.7476
81	G9	Sox2	SYBR	60.2151	60.5466	60.8417	61.1546	61.4436	61.7416	62.0565	62.2279	62.6443	62.9368	63.2551	63.5564	63.8431	64.1535	64.4468	64.7441	65.0551	65.3605	65.6557	65.9528	66.2546	66.5411	66.8452	67.1493	67.4433	67.7528	68.0499	68.3445	68.6492	68.9488	69.2355	69.5366	69.8441	70.1525	70.4489	70.7257	71.0433	71.3622	71.642	71.9536	72.2575	72.5481	72.8444	73.1352	73.4477	73.7503
82	G10	Sox2	SYBR	60.2151	60.5466	60.8417	61.1546	61.4436	61.7416	62.0565	62.2279	62.6443	62.9368	63.2551	63.5564	63.8431	64.1535	64.4468	64.7441	65.0551	65.3605	65.6557	65.9528	66.2546	66.5411	66.8452	67.1493	67.4433	67.7528	68.0499	68.3445	68.6492	68.9488	69.2355	69.5366	69.8441	70.1525	70.4489	70.7257	71.0433	71.3622	71.642	71.9536	72.2575	72.5481	72.8444	73.1352	73.4477	73.7503
85	H1	Olig2	SYBR	60.2142	60.5455	60.8405	61.1464	61.4431	61.7336	62.0583	62.2212	62.6451	62.938	63.254	63.5547	63.8415	64.1523	64.4437	64.7424	65.0581	65.3613	65.6538	65.952	66.2539	66.5404	66.8465	67.1513	67.4405	67.7488	68.0498	68.3446	68.6492	68.9514	69.2348	69.5361	69.8427	70.1518	70.4523	70.7302	71.0441	71.3665	71.6399	71.956	72.2519	72.5473	72.8416	73.1338	73.4486	73.7556
86	H2	Olig2	SYBR	60.2142	60.5455	60.8405	61.1464	61.4431	61.7336	62.0583	62.2212	62.6451	62.938	63.254	63.5547	63.8415	64.1523	64.4437	64.7424	65.0581	65.3613	65.6538	65.952	66.2539	66.5404	66.8465	67.1513	67.4405	67.7488	68.0498	68.3446	68.6492	68.9514	69.2348	69.5361	69.8427	70.1518	70.4523	70.7302	71.0441	71.3665	71.6399	71.956	72.2519	72.5473	72.8416	73.1338	73.4486	73.7556
87	H3	Olig2	SYBR	60.2107	60.537	60.8352	61.1489	61.4376	61.7334	62.0493	62.2244	62.6362	62.9312	63.2511	63.5504	63.8371	64.1504	64.4421	64.7392	65.049	65.3523	65.6474	65.9486	66.2478	66.5352	66.8394	67.1426	67.436	67.7453	68.0429	68.3355	68.6437	68.9473	69.2262	69.5293	69.8375	70.1503	70.4473	70.7239	71.0355	71.3554	71.6317	71.9535	72.2525	72.5428	72.8352	73.126	73.4389	73.7478
88	H4	Sox2	SYBR	60.2107	60.537	60.8352	61.1489	61.4376	61.7334	62.0493	62.2244	62.6362	62.9312	63.2511	63.5504	63.8371	64.1504	64.4421	64.7392	65.049	65.3523	65.6474	65.9486	66.2478	66.5352	66.8394	67.1426	67.436	67.7453	68.0429	68.3355	68.6437	68.9473	69.2262	69.5293	69.8375	70.1503	70.4473	70.7239	71.0355	71.3554	71.6317	71.9535	72.2525	72.5428	72.8352	73.126	73.4389	73.7478
89	H5	Sox2	SYBR	60.2151	60.5421	60.8429	61.1456	61.4435	61.7327	62.0515	62.2239	62.646	62.9364	63.2576	63.5516	63.8417	64.1517	64.441	64.7386	65.0549	65.3555	65.6526	65.9528	66.2525	66.5365	66.8385	67.1476	67.441	67.748	68.045	68.3428	68.6475	68.9501	69.2335	69.5353	69.8433	70.1498	70.4489	70.7275	71.0365	71.3587	71.6391	71.9498	72.2515	72.5439	72.8373	73.1285	73.4433	73.7476
90	H6	Sox2	SYBR	60.2151	60.5421	60.8429	61.1456	61.4435	61.7327	62.0515	62.2239	62.646	62.9364	63.2576	63.5516	63.8417	64.1517	64.441	64.7386	65.0549	65.3555	65.6526	65.9528	66.2525	66.5365	66.8385	67.1476	67.441	67.748	68.045	68.3428	68.6475	68.9501	69.2335	69.5353	69.8433	70.1498	70.4489	70.7275	71.0365	71.3587	71.6391	71.9498	72.2515	72.5439	72.8373	73.1285	73.4433	73.7476
93	H9	Sox2	SYBR	60.2151	60.5466	60.8417	61.1546	61.4436	61.7416	62.0565	62.2279	62.6443	62.9368	63.2551	63.5564	63.8431	64.1535	64.4468	64.7441	65.0551	65.3605	65.6557	65.9528	66.2546	66.5411	66.8452	67.1493	67.4433	67.7528	68.0499	68.3445	68.6492	68.9488	69.2355	69.5366	69.8441	70.1525	70.4489	70.7257	71.0433	71.3622	71.642	71.9536	72.2575	72.5481	72.8444	73.1352	73.4477	73.7503
94	H10	Sox2	SYBR	60.2151	60.5466	60.8417	61.1546	61.4436	61.7416	62.0565	62.2279	62.6443	62.9368	63.2551	63.5564	63.8431	64.1535	64.4468	64.7441	65.0551	65.3605	65.6557	65.9528	66.2546	66.5411	66.8452	67.1493	67.4433	67.7528	68.0499	68.3445	68.6492	68.9488	69.2355	69.5366	69.8441	70.1525	70.4489	70.7257	71.0433	71.3622	71.642	71.9536	72.2575	72.5481	72.8444	73.1352	73.4477	73.7503
[truncated: 71 more columns]

## Sheet: Melt Region Normalized Data
Block Type	96well
Chemistry	SYBR_GREEN
Experiment File Name	D:\Applied Biosystems\StepOne Software v2.3\experiments\JB\12_4_YY1_KD_Exp6_JB_Olig2_Sox2.eds
Experiment Run End Time	2016-12-04 20:36:07 PM PST
Instrument Type	steponeplus
Passive Reference
Well	Well Location	Target	Reporter Dye	Reading 1	Reading 2	Reading 3	Reading 4	Reading 5	Reading 6	Reading 7	Reading 8	Reading 9	Reading 10	Reading 11	Reading 12	Reading 13	Reading 14	Reading 15	Reading 16	Reading 17	Reading 18	Reading 19	Reading 20	Reading 21	Reading 22	Reading 23	Reading 24	Reading 25	Reading 26	Reading 27	Reading 28	Reading 29	Reading 30	Reading 31	Reading 32	Reading 33	Reading 34	Reading 35	Reading 36	Reading 37	Reading 38	Reading 39	Reading 40	Reading 41	Reading 42	Reading 43	Reading 44	Reading 45	Reading 46
1	A1	Olig2	SYBR	273308	272536	272125	271748	270941	270260	269183	268238	266583	266296	264912	263496	261821	260648	258973	256929	255470	253453	251540	249522	247453	245654	242297	240958	239290	236327	234483	232518	229571	227230	224945	222893	220161	217888	215338	213100	210569	208013	205989	203398	200993	198533	196354	193595	191596	188978
2	A2	Olig2	SYBR	316800	313662	313894	311907	310291	308500	307165	306025	305122	303018	301898	301874	300377	299246	297890	296323	295001	293745	290633	288382	286243	282977	279199	277461	276030	271534	268406	266962	263642	260481	257810	255299	252847	250266	247289	244669	241133	238627	236276	233237	230424	228175	225744	222248	219218	217371
3	A3	Olig2	SYBR	289338	288936	288203	287125	286488	285536	284650	283791	282475	281126	280330	279150	278275	276876	276103	274598	272960	270873	269165	266955	264560	262213	259692	257191	254345	251416	248885	246368	243362	240804	237944	235311	232730	229958	227303	224694	221782	219201	216336	213773	211155	208504	206142	203216	200587	198263
4	A4	Sox2	SYBR	264245	264396	262934	262420	261807	261012	260840	260194	259683	258445	258023	258502	259950	257212	258955	255204	254167	253282	251324	249516	247676	245516	244201	243261	238760	236167	233444	231050	228469	228007	223349	220838	218577	214826	212859	209612	207534	205419	202027	199824	199256	194454	191581	189321	188396	186221
5	A5	Sox2	SYBR	271759	272219	272192	272038	271668	271578	270933	270540	269782	268954	268112	267343	265570	264205	262442	261291	259087	256909	254899	252863	250382	248142	245695	243258	240913	238354	236129	233621	230770	228311	226173	223239	220507	218136	215418	212756	210231	207650	205267	202714	200150	197672	194950	192331	189786	187047
6	A6	Sox2	SYBR	269395	269645	269632	269364	268966	268588	267943	267372	266845	265703	265219	265086	264081	263287	261787	260768	258679	257684	255357	253396	250941	248927	246479	243629	240986	238681	236526	233679	231239	228918	226349	223408	220967	218364	215517	212988	210459	207829	205434	202656	200285	197783	195007	192230	189704	187203
7	A7	Olig2	SYBR	270028	270905	270386	270668	270339	269823	268900	268326	267136	265964	265026	264301	262891	261716	260452	259164	257047	255001	252674	250050	247820	244825	242470	240151	236998	234599	231770	229202	226772	223969	221230	218756	215829	213668	210973	208052	205755	202924	200497	197806	195320	192808	190499	187772	185205	182694
8	A8	Olig2	SYBR	280701	280444	281776	280797	280991	280092	279403	278909	277753	276996	275775	274563	274323	273526	270711	269546	267680	264952	263106	260232	257975	255682	252351	249735	247428	244301	241400	238264	235542	232826	229718	227097	225042	221543	219269	216607	213808	210737	207942	206056	203039	200416	197488	195201	192382	189655
9	A9	Olig2	SYBR	278794	279183	279415	279652	279317	278109	277636	277405	276268	275125	274323	273139	272122	271030	269778	268542	266660	264726	262130	259402	257031	254731	251467	249196	246376	243593	240881	237926	235411	232637	229692	226875	223981	221600	218514	215412	212774	210339	207650	204724	202353	199618	196918	194277	191826	188743
10	A10	Olig2	SYBR	284152	284474	283693	283101	281697	282104	280549	279259	278076	277875	276459	277709	274795	272071	271315	268659	266936	264913	262186	260166	256855	257390	255103	249350	247084	245738	242510	238917	234748	232032	230861	225938	223172	220947	220690	216259	212794	211755	206785	203419	201495	198881	196123	193562	191578	188131
11	A11	Sox2	SYBR	208181	209627	210498	211193	210930	211038	211285	210313	210575	209677	209243	209087	207830	207220	205886	205031	203934	202267	200836	198656	196702	194747	192045	190037	187879	185677	183357	181026	178609	176210	174194	171821	169088	167127	164877	162333	160304	158076	155873	153821	151562	149512	147126	144839	142671	140573
12	A12	Sox2	SYBR	206560	207562	208374	209010	209052	209221	210082	208926	209627	208715	207516	207293	205520	204455	202999	201625	200844	197971	197054	195072	192308	190846	188006	185907	183779	182150	180145	177862	175190	173443	171277	169202	166970	164319	162693	160026	158390	156240	153969	151710	149760	147724	145360	143038	140990	139172
13	B1	Olig2	SYBR	299445	298956	298802	297195	296834	295804	295267	293911	293455	292282	290771	289760	289347	286877	285936	284772	282138	280594	277586	275134	273151	269708	266856	264830	261032	260510	256011	252529	251406	247632	245388	241178	239249	236174	234152	231705	229508	226755	223659	220914	218109	215773	212696	211289	208023	206128
14	B2	Olig2	SYBR	319077	320646	318464	317603	319406	319655	319434	317746	316459	316418	317317	313011	312214	311630	308691	307589	304966	301471	300490	297750	294532	291960	290921	285638	282315	279668	277022	272558	269802	266311	264233	260795	257755	253372	251248	247023	246095	242991	239179	237162	233636	230408	227498	225240	222255	218887
15	B3	Olig2	SYBR	316549	316135	315765	315250	314624	313694	312623	311630	310559	310430	309314	308368	307445	305950	304329	302671	300655	297626	295396	291719	289316	286857	283209	279774	276653	273198	271020	267746	264250	261769	259110	255906	252651	249890	246292	243069	240177	237556	235225	231786	229255	225962	223218	220723	217948	215230
16	B4	Sox2	SYBR	297562	297678	294767	294548	295246	294646	294642	293608	293431	293144	292328	292403	292702	290073	289656	286304	284130	282229	279279	276813	274299	271010	269352	267279	263442	260842	257725	254270	251282	249497	245963	242379	239956	237016	234500	231166	228327	225511	222787	219997	217577	213771	210901	207682	206051	203180
17	B5	Sox2	SYBR	281597	282574	283175	282731	282469	283516	282577	283296	282650	282272	281624	282270	279812	278999	276733	276702	274221	270936	269307	266629	263755	261680	258214	255641	252767	249922	248379	245345	241649	238757	237500	233564	230813	228078	225214	222009	219430	216500	214236	211719	208982	206804	203104	200603	197535	194410
18	B6	Sox2	SYBR	287790	288961	289263	289974	290858	290265	290762	288896	288891	290523	289896	287340	286628	284728	283233	280771	280087	276107	273554	270666	269542	265514	263202	261171	258933	255544	252047	250083	246162	243295	240720	238994	235143	232283	229550	227486	224167	221164	218369	216072	213157	210325	207995	205880	203195	199560
19	B7	Olig2	SYBR	296301	297101	296914	297583	297426	297106	296464	296100	295270	294303	293449	292593	290369	288627	286378	283830	280544	277784	275166	271274	268762	265560	263151	260272	256887	254267	250868	247706	245127	241804	238961	236054	233233	230849	227778	224652	221813	219080	216472	213303	210904	207839	205639	202523	199744	197223
20	B8	Olig2	SYBR	303466	305022	304278	305298	304715	304594	304259	303268	302861	301979	301161	299417	296495	293316	291871	287920	285020	282715	279021	276060	272708	269466	266851	263686	259881	257573	254446	251567	248849	245696	243496	240418	236555	234526	230924	228297	225479	222819	220081	216212	213915	211114	208941	205477	202739	200170
21	B9	Olig2	SYBR	280913	281185	281128	280951	280571	280450	279842	278729	277617	276661	275577	273989	272653	269789	267418	265024	262170	259320	257112	254137	251433	248249	245925	242265	239407	236079	233432	231208	227413	224654	222303	219685	216958	213461	211202	208408	205704	202727	200271	197441	194668	192424	189663	186881	184377	182314
22	B10	Olig2	SYBR	274041	274463	275254	275606	276303	274643	274568	273823	272667	270591	269635	265750	265464	264628	261935	260554	257620	255032	252793	249266	247110	241893	238926	238830	235704	231173	229279	226919	225539	222381	218066	217272	214856	211494	206264	205686	203411	199216	198838	197075	193421	190944	188799	185814	182832	181159
23	B11	Sox2	SYBR	232445	232759	233733	234062	235150	235124	234398	235862	235178	236050	235652	234602	235250	233167	231837	229625	226979	224735	221946	220148	217276	214440	212741	209796	207625	204399	201665	199135	195992	193380	190199	188008	186286	182839	180557	178657	175876	173088	170631	167297	165523	162693	160820	158513	156634	153571
24	B12	Sox2	SYBR	222484	223670	224841	225520	225943	226156	225438	226063	224907	225228	225879	224882	224949	224093	223068	221566	219006	218112	214896	212612	211105	207881	206036	203232	201023	197612	195280	192926	190853	187779	185489	182728	180463	178495	175488	173511	170764	168414	166128	163637	161343	158920	156757	154686	152609	149834
25	C1	Olig2	SYBR	288210	285266	287362	286428	285649	285451	284322	282640	281076	283890	281556	279793	277731	277042	276070	274460	273028	271240	268329	265837	264664	261004	259266	255612	251424	250093	246714	243121	240119	237439	236476	232495	229145	226651	224352	221573	220117	217493	214294	211208	208412	206215	202864	200743	198998	196965
26	C2	Olig2	SYBR	321783	322047	322198	322530	322136	321024	320506	319723	318344	318322	316611	315174	314728	312592	311008	308340	306247	304314	300760	298257	295129	291968	290670	286246	282733	279877	276501	272867	269489	266873	263817	260429	256878	253832	250605	248052	244616	241479	238713	234968	232615	228546	226035	223531	220753	217334
27	C3	Olig2	SYBR	315554	315917	314903	313559	313137	312070	311286	310567	308803	306239	305067	303093	300965	299175	297246	293870	290909	287865	284671	282382	278858	275493	273034	270046	266771	263905	260248	257168	254756	251616	247692	244966	243021	239415	237419	234561	231043	228248	224705	222444	219451	216589	214413	210663	207944	205662
28	C4	Sox2	SYBR	261006	261693	260910	261067	260916	260284	260529	261090	261080	260694	260207	260987	262439	259693	260758	256672	255101	253406	250798	248779	246194	243501	241740	240536	236022	233390	230847	228554	225508	224812	220240	217745	215249	211968	210114	207049	204466	201874	199356	196499	195622	191490	188179	185907	184294	181990
29	C5	Sox2	SYBR	285736	286768	287153	288158	288602	288136	288813	287296	287656	286467	286170	284296	284415	281779	281078	278087	275335	275116	271520	269074	265997	262434	260324	258270	255400	252935	248023	245817	243398	241150	236685	235852	231687	229183	226325	224111	221294	218728	215208	212478	210347	206434	205183	201991	199510	197152
30	C6	Sox2	SYBR	289261	289546	290000	290297	291022	290814	290518	288946	288191	288417	287341	285241	283001	280952	278936	276923	275319	272193	269364	267138	265224	261330	258927	256993	254515	250969	247834	245848	242397	239452	237033	235083	231265	228173	225267	223441	220139	217302	214713	211972	209227	206182	203773	201198	198830	195040
31	C7	Olig2	SYBR	309677	311376	311961	311642	312200	312444	311734	312008	310861	310685	309182	307357	306165	302975	300310	297941	294819	291336	287679	285297	281435	277881	274311	270948	268092	264940	262219	259399	256137	253674	249993	247467	243894	240615	237865	234987	232395	228997	226127	223370	219975	217273	214016	211695	208331	205349
32	C8	Olig2	SYBR	310622	311127	311297	311564	311157	310840	310089	308413	307243	305885	304289	302112	299428	296236	293934	290192	287581	284684	281579	278498	274998	271889	268947	265830	262346	259532	256277	253247	250263	247244	244639	241584	238048	235473	232202	229493	226519	223846	221115	217374	214939	212333	209675	206303	203746	201012
33	C9	Olig2	SYBR	299468	300501	301908	302658	303132	301634	302417	303325	302537	301586	300886	299483	296911	294783	292042	289753	286076	283656	279871	275608	272842	270548	266228	264164	261012	257695	255295	251330	249143	246020	243030	239681	236370	234423	230433	227160	223841	221664	218903	215613	213256	210114	207302	204401	201852	198005
34	C10	Olig2	SYBR	273960	273808	273228	273322	272770	273204	272114	271331	269921	269435	267778	267545	264415	261956	259390	256520	253324	250452	247704	245203	241874	240088	237181	233422	230746	228185	225488	222394	219291	216579	214039	211210	208859	206090	203805	200976	198209	195648	192798	190231	187299	184951	182739	179936	177516	175344
35	C11	Sox2	SYBR	247943	248711	251374	252123	252617	252469	252462	254075	254248	254076	253723	253712	252977	251241	249208	247584	244577	241648	239141	236723	232499	230403	227698	224356	222767	219908	217493	213889	211143	207091	204246	202092	199703	196105	193652	192080	190060	186098	183716	180109	178016	175156	172641	169727	167962	164403
36	C12	Sox2	SYBR	237097	238400	239771	240325	240954	241452	241011	241350	240663	240551	240555	239567	238852	237427	235960	234246	231416	229720	226768	224337	222611	219360	217080	214804	212248	208833	206479	203798	201589	198393	196187	193282	190824	188679	185554	183653	180624	178111	175454	173059	170717	168225	165812	163512	161331	158383
37	D1	Olig2	SYBR	319416	317087	319363	318151	317619	317304	316277	314496	313140	316260	312687	310814	308953	306559	305202	302953	300470	298576	294836	292587	290891	286719	285115	280764	276246	274849	271512	267154	264179	261024	259542	255575	252043	248892	246384	243173	241541	239206	235790	231880	228908	226791	222868	221217	218969	216709
38	D2	Olig2	SYBR	316445	317536	317315	317698	317743	316829	316155	315461	313898	313629	311416	310070	308995	306908	304799	302318	299602	296766	293762	291124	287797	284490	282053	278521	275060	272640	269273	265701	262452	259577	256801	253463	249973	246880	243609	241111	238120	234964	232255	228816	226108	222377	219765	217129	214403	210947
39	D3	Olig2	SYBR	313904	313715	313571	312406	312575	312160	311273	310856	309828	308201	307374	305885	305161	302258	300455	297952	294402	290582	288690	284673	281617	277754	274340	272142	268908	265162	261811	259339	255795	252966	249903	247175	243897	241052	238513	236041	232803	229676	226469	224167	220997	218283	215613	212148	209070	206208
40	D4	Sox2	SYBR	248785	249969	252251	252389	252679	252608	252584	253271	252763	252066	251174	250213	248645	248279	246017	244973	243390	240709	238515	236499	234149	232769	229599	227246	225433	222355	219943	218414	215616	212275	210058	207969	204975	202800	200422	198735	195342	191947	190305	187019	184476	182567	180077	177353	173378	171144
41	D5	Sox2	SYBR	267701	268635	270164	270683	270110	271810	270495	271193	271106	269938	269806	269196	268300	267219	263902	263854	260447	258621	256836	253464	250153	248294	244623	242877	240484	237727	234826	233678	229147	225713	224525	221501	218282	215624	213005	210361	207896	205660	202225	200298	197446	194426	192026	189661	186430	182915
42	D6	Sox2	SYBR	274963	275636	276664	277364	276970	277424	277811	276908	277103	277490	277083	276636	274904	273320	271590	269044	268369	265279	263104	259992	258547	254797	252240	250709	247332	244123	241209	239172	236008	233431	230576	228410	224535	220887	218423	216355	213545	210649	207626	204657	202182	199024	195831	193580	191199	187567
43	D7	Olig2	SYBR	306318	306851	306893	307073	306917	307022	306811	305618	304568	303268	301125	298476	295934	292813	290181	286822	284317	281201	277807	273999	272367	267669	265481	263054	258720	256133	253269	249889	246893	244073	241205	238684	235394	233165	229609	226444	224037	220660	218006	215473	212848	209791	207633	204138	201307	198608
44	D8	Olig2	SYBR	304950	306242	306029	306276	306427	306002	305377	304010	303413	302383	300933	298861	296569	293004	290886	286854	284567	281873	278974	275727	272412	269490	266343	263105	259690	256751	253642	250516	247744	245162	242360	239738	236088	232959	229821	227289	223887	221358	218433	214568	212284	209233	206150	203175	200480	198022
45	D9	Olig2	SYBR	239916	240580	241523	241881	241890	240699	240612	240654	239554	237949	236812	235058	232890	230910	228322	226310	223195	221383	218536	215342	213046	211204	207986	206443	203667	201596	199291	196216	194586	191952	189559	187147	184594	182684	180084	177677	174912	172901	170638	168407	166397	163999	161774	159728	157629	154901
46	D10	Olig2	SYBR	283386	283833	284148	284021	284120	283514	283149	281971	280886	279290	278219	276613	274098	272030	269094	266387	263018	260143	257189	254166	251100	248276	245225	242542	239558	236098	233573	230432	227801	224661	221623	218830	216223	213613	210279	207855	205011	202294	199872	197107	193887	191345	189023	186283	183814	181595
47	D11	Sox2	SYBR	234975	235608	237179	237864	238591	238526	238624	238651	238963	238724	238698	238468	237758	236648	234397	232952	230662	228087	225297	223135	219644	217102	214221	211686	209792	207110	204696	201751	198888	195858	192923	190392	188035	185138	182506	180790	179139	175504	173415	170239	168065	165284	162512	160123	158137	155228
48	D12	Sox2	SYBR	222220	223605	225213	225575	226007	226633	226258	226609	225936	225956	226415	225476	225032	223998	222790	221487	218595	217286	214601	212173	210223	207213	204937	202613	200000	197069	194264	191966	189976	186877	184743	181727	179482	177368	174316	172490	169839	167464	165097	162652	160236	157731	155810	153329	151404	148563
49	E1	Olig2	SYBR	284419	283236	284203	284351	284282	283649	282914	281468	280005	281300	279135	278083	277001	274184	272945	270760	268321	266606	263784	262350	260433	256318	255081	249684	246706	245338	242510	238638	236184	233585	231650	227182	224043	221482	219535	217003	215765	213115	209975	205743	202987	201500	197819	196298	194237	192332
50	E2	Olig2	SYBR	293865	296399	296249	296285	297174	297022	296256	295785	294567	294361	293742	292090	291163	289441	287494	285510	282276	278488	276857	273431	270452	267472	264331	261473	258370	255884	253252	249035	246480	243398	240993	237620	234929	231206	228456	225416	223496	220557	217355	214624	211607	208618	206339	203673	200399	197325
51	E3	Olig2	SYBR	297215	296745	296828	296230	296633	296303	295337	295252	294379	292950	292092	291189	290964	288464	285564	283393	280971	277336	274513	271323	268056	264084	260901	258276	255642	251994	248607	246000	242937	239835	236826	234246	230839	228392	225627	223396	220341	217143	214266	211880	208829	205942	203292	200075	197007	194040
52	E4	Sox2	SYBR	225244	225885	228508	228930	229368	230927	230269	230779	230809	229915	230160	228497	225487	227116	222146	223670	222205	218743	217061	215049	213174	210830	208448	205124	204292	202153	199501	198323	195931	190552	189676	187576	184955	183451	180864	179200	175664	172823	171043	167755	164394	164126	162103	159265	154262	152210
53	E5	Sox2	SYBR	236439	237563	238999	240268	240336	241386	241575	241771	241236	241345	240972	240707	238930	238589	236081	235426	232927	230726	228945	226740	223986	222399	219529	216598	214977	212174	210721	208573	205348	202276	200769	197637	195475	192949	190045	187726	184922	182238	179451	177382	174098	171877	168586	166123	162786	159763
54	E6	Sox2	SYBR	234742	236333	237552	238849	239218	239418	241094	239373	240451	240577	239988	239194	238112	236555	235532	233096	232215	229841	227629	225100	223624	220622	218609	216976	213453	210846	208012	206394	203554	201003	198413	196441	193101	191179	187674	186277	183050	181038	178243	175376	173074	170646	167221	165204	162558	158842
55	E7	Olig2	SYBR	307793	308723	309142	309525	309764	309650	309253	308402	308400	307612	306662	304731	302274	299626	297054	294175	290949	287829	284903	281389	278560	275166	272228	269220	265503	262940	259841	256136	253375	250139	247436	244372	241431	238469	235502	232582	229605	226641	223893	220809	218415	215118	212575	209609	206964	204168
56	E8	Olig2	SYBR	305897	307778	306913	307323	307891	306916	306466	304766	304240	303159	301689	300032	298553	295367	293270	289837	287558	285018	281913	278598	275352	272805	269114	265858	262406	258907	256382	253277	250078	247434	244484	242273	238438	235469	232116	229995	226301	224080	220963	217400	214998	211926	208969	206097	203045	200895
57	E9	Sox2	SYBR	252902	254975	256389	257090	258032	257963	258903	258965	258527	258342	257372	256411	254200	252005	249723	247432	244106	241670	238908	235942	232862	229870	226857	224477	221838	218412	216054	213048	210517	208032	205135	202141	199397	197490	194581	191354	188389	186008	183641	181175	178915	175977	173313	170930	168507	165467
58	E10	Sox2	SYBR	241257	242748	243682	244709	244406	244866	245225	245159	244972	243955	244038	242394	241671	239836	238138	236441	233105	230718	228047	225433	222738	219975	217393	215048	211828	208849	206123	203012	201207	198205	195039	193048	190278	187082	184253	182242	179528	176442	174810	172673	169421	166622	164539	162184	159645	157614
59	E11	Sox2	SYBR	235349	236168	237210	237888	238734	238721	238661	238930	238973	238416	237904	237106	236043	234310	232341	230526	228225	225344	223156	220422	217482	215025	212196	209846	207326	204620	202033	199290	196362	193551	190935	188335	185806	182914	180423	177708	175696	172949	170606	168033	165642	162929	160640	157855	155742	153081
60	E12	Sox2	SYBR	248080	249332	249786	250973	251222	251294	251758	251283	250854	250658	250895	249775	248939	247875	245770	244406	241945	240163	237623	234807	231777	229313	226823	224051	221304	218432	215723	213034	209806	207344	204639	201146	198618	195548	193434	190951	188358	185191	182658	180434	176967	174332	171871	169411	166694	163926
61	F1	Olig2	SYBR	291886	290912	292146	292759	293101	292433	291754	290010	288306	289792	287141	286117	284907	282034	280772	278622	275608	274610	271125	270235	268186	263641	262858	256553	253095	252070	249209	244593	242055	239426	237255	232132	228761	226129	224224	221708	220564	217876	214174	209494	206829	204997	201087	199802	197631	195690
62	F2	Olig2	SYBR	281717	283846	283574	282941	283439	283180	282096	280974	279353	278565	277600	274980	273125	271619	269372	267532	264692	261024	259511	256140	253631	250535	247606	244420	241757	238688	236298	232276	229756	226516	224206	221012	218498	214623	212048	209089	207384	204610	201357	198625	195573	192876	190614	187756	184506	181916
63	F3	Olig2	SYBR	296608	295696	296569	296370	296386	296205	295130	294573	293374	291321	289981	288402	287818	284804	281094	279333	276438	272758	270073	266518	263606	259684	256614	253965	251550	247716	244244	241674	238443	234812	232277	229714	226111	223709	220877	218434	215658	212305	209154	207106	203789	201187	198349	195234	192211	189270
64	F4	Sox2	SYBR	195162	197462	200883	202297	203631	205265	205621	206042	206194	204740	205284	203863	200912	201912	197406	198780	197254	193949	192551	189984	188374	186618	183723	180418	179844	177099	174363	172896	170090	165281	164235	162187	159511	157859	155140	153783	150333	147080	145382	142374	138757	138095	136010	133454	129254	126707
65	F5	Sox2	SYBR	195604	199533	202672	204933	206517	208076	208965	209692	209539	210042	209765	209825	208462	207831	206385	205685	203428	201364	199406	197073	194441	192263	189926	187054	184668	182150	180759	177568	174772	172379	170682	167323	164681	162778	159561	157401	154776	152078	149661	147349	144961	142677	139896	137650	135113	132655
66	F6	Sox2	SYBR	203568	206971	210369	213075	215089	216487	218349	217704	218634	218867	218390	218110	217198	215665	213866	211665	210631	208466	206562	203696	202126	199583	197009	194606	192140	189334	186440	184330	181398	178843	176515	174345	170890	168203	165539	163372	160857	157681	155198	152376	150223	147944	145048	142508	139751	136731
67	F7	Olig2	SYBR	310173	310929	311677	311624	311802	311724	311520	310804	309945	309326	307886	306069	304176	301807	299026	296320	293547	290397	287031	283841	280646	277564	274092	271108	267988	264782	261940	258566	255565	252523	249501	246198	243022	239811	237124	234086	230933	227921	224946	221983	219069	215988	213007	209921	207243	204375
68	F8	Olig2	SYBR	292344	293330	293282	293493	293912	293250	292723	291903	290753	289699	288598	286808	285061	282011	279332	276554	274474	271539	268789	265658	262721	260243	256858	253386	250677	247659	244556	241754	238867	235765	233233	230870	227283	224839	221471	219110	215846	213574	210771	207403	205056	202328	199292	196617	193983	191261
69	F9	Sox2	SYBR	259131	261436	262625	263658	264344	264522	265759	265881	265678	265774	265333	264718	263824	262304	260717	258121	255888	253763	250958	247745	244580	241035	238245	235549	232439	229013	225979	223102	220664	218225	214904	211933	208884	206694	203810	200359	197381	194903	192289	189713	187064	184211	181584	178995	176355	173255
70	F10	Sox2	SYBR	246380	248318	249922	250340	250497	250755	251360	250721	250467	249726	250460	249023	248313	247025	245546	244108	240963	238542	235638	233540	230631	227634	224833	222999	220007	216657	214029	210562	208853	205865	202039	200420	197252	194411	191112	189125	186118	183201	181350	179492	176202	172800	170528	168322	165852	163836
71	F11	Sox2	SYBR	237876	239338	240614	241657	242470	243022	243372	243231	243747	243315	243052	242503	241632	239820	237958	236107	233992	231557	229283	226252	223678	221210	217835	215679	213298	210364	207728	204924	201863	199256	196689	193693	191093	188290	185783	182766	180522	177974	175356	173065	170450	168030	165392	162609	160331	157723
72	F12	Sox2	SYBR	212799	213891	214018	215253	215019	215441	215784	215329	215221	215000	215240	214798	214144	213414	211542	210712	208587	207328	205265	202886	200499	198016	195595	193590	191583	189095	186607	184554	181626	179159	177361	174538	171700	169111	167614	165342	163275	160406	158040	156260	153586	151051	148808	146903	144798	142067
73	G1	Olig2	SYBR	242556	241542	242046	241869	241394	241104	240291	239297	238374	238145	236936	235929	234532	233954	232174	230428	229184	226552	225253	223164	220617	218180	215412	213242	210963	207510	205695	203723	200557	198007	195386	193632	191008	188229	185134	183172	180628	178321	176085	174140	171467	168882	166858	164423	161985	159736
74	G2	Olig2	SYBR	257015	257631	258295	259008	259059	258062	257571	256675	255405	254990	252946	251997	250238	249377	247117	245208	242977	240952	238420	236012	233033	230051	227935	224580	221753	219315	216557	214197	211016	208751	206224	203818	200704	197999	195711	193203	190471	187734	185869	182809	180574	177585	174875	172586	170197	167608
75	G3	Olig2	SYBR	272761	274155	274605	274689	274738	273839	273407	272382	271129	270597	269372	267940	265874	263963	262105	259563	256862	254186	251120	248379	245369	242885	239640	236393	233312	230628	228095	225186	222155	219614	216709	213689	211269	208178	205240	202482	199768	197104	194756	191771	189013	186339	183753	181560	178937	176564
76	G4	Sox2	SYBR	252905	253440	252640	253242	253836	254102	254075	254060	253826	253396	253048	253486	254917	251528	253564	249106	247262	245978	243391	241130	238203	235876	234599	233322	228792	226298	224247	221320	219034	218396	214089	210584	208140	205060	202970	199049	196940	194583	191924	189349	188016	183197	180437	177822	176983	174405
77	G5	Sox2	SYBR	254988	256807	257747	258728	259853	260101	260508	259740	260064	258796	258717	256994	256319	253901	252779	249894	248077	246332	243176	241468	239212	235946	233762	232051	229196	226958	223086	220642	218807	216566	212612	211007	207882	204889	202682	200125	197355	194484	192527	189443	187218	184051	182290	178808	176824	174319
78	G6	Sox2	SYBR	263970	265344	266626	267387	268115	268315	268575	268782	268462	267817	267392	267444	266251	264599	262474	260990	258378	256781	254847	252553	249596	247325	244576	241694	238997	236652	234027	231053	228703	226055	223261	220365	217806	214818	212269	209119	206494	203501	200858	198089	195514	193150	190302	187046	184225	181759
81	G9	Sox2	SYBR	247704	249651	250397	251064	251688	251966	251992	252360	251362	251814	251834	250883	250210	248242	246594	243910	241748	239379	236709	233963	231230	228268	225507	222529	219616	216489	213577	210817	208308	206242	202962	200126	197530	195151	192555	189381	186669	184188	181457	179395	176575	174189	171504	169396	166807	163708
82	G10	Sox2	SYBR	246409	247981	248421	248785	249497	249146	249565	248993	248076	248132	248035	247635	245431	244590	242948	240922	238791	236547	233938	231663	229049	226313	223215	220574	218328	215031	212428	208964	206339	204021	201183	198157	195867	193084	190683	188033	184723	182341	179985	177384	174575	171670	169686	166470	164355	162186
85	H1	Olig2	SYBR	15459.3	15312.8	15191.1	15074	14988.3	14841.7	14750.7	14640.4	14461.5	14432.2	14296.7	14176.3	14100.8	13917.4	13827.4	13754.5	13568.4	13537.1	13336.3	13270.2	13211.2	13042.9	13011	12762.7	12641.6	12658.5	12521.2	12347.8	12297.5	12211.6	12147.7	11913.2	11807.7	11734	11754.6	11634.3	11618.2	11502.7	11396.7	11221.9	11139.5	11138.7	10953.3	10952.3	10898	10827.1
86	H2	Olig2	SYBR	12258.6	12148.2	12007.7	11893.1	11744.9	11608.3	11488.8	11375.6	11227.8	11128	11030.6	10935.9	10845.1	10754.7	10635.3	10551.3	10445.5	10334.9	10220.3	10101.2	9986.65	9843.29	9755.85	9600.53	9503.64	9380.3	9282.5	9164.05	9053.09	8961.92	8848.51	8756.84	8649.08	8558.16	8471.52	8384	8327.23	8221.85	8140.92	8056.08	7970.77	7908.21	7833.64	7778.98	7689.23	7627.52
87	H3	Olig2	SYBR	9885.48	9658.46	9580.81	9466.55	9323.26	9239.83	9149.43	9083.06	8977.64	8876.43	8833.96	8749.11	8751.2	8629.85	8491.17	8474.57	8380.28	8244.13	8169.19	8034.36	7969.55	7834.22	7730.9	7637.6	7573.81	7426.07	7343.22	7269.91	7146.53	7052.93	6987.5	6930.54	6822.49	6775.32	6683.69	6625.21	6558.8	6471.41	6401.31	6377.35	6285.43	6235.39	6186.66	6121.45	6037.68	5975.66
88	H4	Sox2	SYBR	36033.2	35717.5	35246.1	34929.2	34615.7	34300.5	33988.3	33650.1	33372.9	33010	32696.5	32384.9	32101.8	31623.6	31325.4	30801.8	30394.3	29954.5	29495.6	29017.2	28581.8	28086.1	27701.4	27284.9	26745.7	26273.2	25827.8	25380	24944.9	24592.7	24068.1	23666.7	23268.8	22835.8	22479.6	22080.7	21693.7	21325.4	20935.2	20562.8	20269.3	19852.1	19520.7	19164.7	18917.7	18598.2
89	H5	Sox2	SYBR	11882.4	11745.5	11563.5	11416.5	11271.8	11132.7	11016.6	10881.1	10742.6	10623.9	10510.4	10408.6	10250.8	10113.2	10001.8	9881.85	9708.45	9564.92	9402.96	9242.43	9089.54	8947.05	8797.63	8670.68	8520.91	8412.18	8309.15	8160.6	8029.08	7921	7850.68	7697.19	7567.6	7519.82	7419.5	7284.1	7166.74	7099.04	7016.08	6926.53	6832.75	6770.4	6668.01	6583.09	6531.87	6453.22
90	H6	Sox2	SYBR	12336.1	12177.5	12059.8	11924.6	11775	11648	11529.4	11400.2	11281.9	11224.7	11097.6	11023.6	10910.5	10783.4	10690.3	10558.9	10411.6	10248	10084.7	9924.54	9774.08	9595.01	9450.18	9303.54	9161.31	9004.7	8878.45	8742.19	8605.05	8469.92	8359.55	8239.13	8137.97	8033.98	7914.42	7809.56	7716.92	7635.24	7518.33	7420.18	7359.5	7264.56	7170.27	7075.6	7020.77	6899.45
93	H9	Sox2	SYBR	238215	239514	240652	241324	241686	241535	242122	241264	241514	241085	240108	239927	238818	238123	236852	235817	234259	232071	230096	227752	225254	222728	220201	217533	215011	211872	209596	206870	204182	201250	198909	196514	193810	190999	188293	185719	183091	180632	178378	175573	173285	170633	168259	165505	163288	160884
94	H10	Sox2	SYBR	227303	228545	229499	230199	230110	230304	230139	229833	229855	229264	228437	227958	227577	226341	225412	224106	222531	220754	218842	216429	214121	211623	209400	206825	204142	201807	199076	197063	194453	191807	189234	186917	184306	181878	179296	176862	174569	172124	169622	167309	165025	162686	160194	158098	155535	153114
[truncated: 71 more columns]

## Sheet: Melt Region Derivative Data
Block Type	96well
Chemistry	SYBR_GREEN
Experiment File Name	D:\Applied Biosystems\StepOne Software v2.3\experiments\JB\12_4_YY1_KD_Exp6_JB_Olig2_Sox2.eds
Experiment Run End Time	2016-12-04 20:36:07 PM PST
Instrument Type	steponeplus
Passive Reference
Well	Well Location	Target	Reporter Dye	Reading 1	Reading 2	Reading 3	Reading 4	Reading 5	Reading 6	Reading 7	Reading 8	Reading 9	Reading 10	Reading 11	Reading 12	Reading 13	Reading 14	Reading 15	Reading 16	Reading 17	Reading 18	Reading 19	Reading 20	Reading 21	Reading 22	Reading 23	Reading 24	Reading 25	Reading 26	Reading 27	Reading 28	Reading 29	Reading 30	Reading 31	Reading 32	Reading 33	Reading 34	Reading 35	Reading 36	Reading 37	Reading 38	Reading 39	Reading 40	Reading 41	Reading 42	Reading 43	Reading 44	Reading 45	Reading 46
1	A1	Olig2	SYBR	14141.4	13369.7	12511.6	11765.2	11291.7	11163.6	11364.9	11831.3	12494.5	13305.4	14229.1	15232.2	16276.2	17322.7	18342.2	19317.5	20241.6	21108.3	21904.6	22608.8	23199.1	23669.3	24039.7	24355.9	24670.1	25016.6	25396	25780	26129	26415.2	26631.2	26786.8	26896.6	26971.7	27018.3	27041.6	27047.8	27043.6	27029.9	26998.5	26931.3	26808.8	26620.2	26373.2	26097.1	25837.3
2	A2	Olig2	SYBR	15381.4	15719	16018.9	16186.8	16153.5	15897.7	15452	14891.4	14321.2	13860.2	13626.7	13722.5	14216.7	15137.4	16473.2	18176.8	20162.1	22300.1	24425.5	26365.1	27981.5	29212	30076.4	30651.4	31024.7	31259	31381.5	31400.1	31326.2	31191.3	31047.7	30953	30944.7	31020.1	31135	31226.9	31249.2	31195.5	31099.4	31011.8	30969	30972.2	30986.7	30961.3	30858.1	30673
3	A3	Olig2	SYBR	12895.3	12517.7	12084.4	11692.3	11426.2	11326.2	11379.8	11540.2	11761	12027.8	12371.5	12858.2	13562.2	14535.2	15786.2	17275.6	18927.4	20648.6	22351	23963.2	25433.7	26728.1	27823.2	28707	29380.6	29859.6	30172.2	30352.9	30435.2	30449.1	30422	30378.4	30337.6	30309.4	30291	30268.6	30225.2	30149.9	30042.2	29912	29773.4	29637.7	29510.7	29394.6	29290.1	29198.6
4	A4	Sox2	SYBR	9285.49	9296.52	9190.25	8952.3	8591.5	8126.55	7576.99	6974.58	6399.22	6009.47	6028.38	6669.8	8035.73	10051.3	12481.2	15023.4	17423.1	19549	21406.2	23095.7	24747.9	26451	28198.6	29880.5	31334.7	32439.7	33189.4	33696.9	34120.7	34564.8	35023.5	35398.3	35571.2	35477.6	35141.3	34660.7	34165.3	33763.1	33503.5	33365.9	33287.9	33222.7	33192.8	33296.3	33647.6	34292
5	A5	Sox2	SYBR	13023.5	11654.8	10109.5	8721.69	7779.34	7439.58	7715.94	8523.97	9742.12	11254	12962.1	14783.8	16648.6	18498.4	20290.9	21995.7	23588.2	25044.9	26343.4	27467.1	28408.8	29174.6	29784.8	30272.8	30677.9	31035.9	31370.2	31689	31988.7	32258.9	32486.4	32656.3	32755.7	32777.6	32728.7	32631	32519.6	32432.2	32396.5	32419	32481.4	32549.1	32588	32582.5	32546.7	32521.6
6	A6	Sox2	SYBR	10233.3	9423.39	8542.34	7783.72	7290.55	7110.82	7207.87	7510.13	7969.9	8593.06	9430.56	10542.5	11957.1	13652	15560.8	17597.7	19679.1	21731.5	23689.7	25489.8	27071	28382.9	29398.1	30124.1	30607.6	30925.2	31161.4	31384.4	31629.2	31894.9	32154.2	32369.6	32509.1	32558	32524.5	32436.5	32333.6	32254.6	32226.1	32253.7	32320.6	32395.7	32446.3	32455.7	32431.8	32406.2
7	A7	Olig2	SYBR	11221.7	10176.7	9091.94	8234.45	7795.9	7826.46	8244.29	8902.64	9669.23	10478.6	11340.3	12313.2	13467.4	14848.5	16455.5	18233.1	20080.9	21875.6	23501.2	24875.9	25965.8	26781.9	27364.7	27764.3	28027.3	28191.3	28284.9	28328.4	28334.9	28311.2	28261.7	28193.1	28114.9	28036.3	27960.4	27883.1	27796.4	27695	27581	27463.7	27355.2	27264.2	27191.1	27128.2	27062.8	26983.3
8	A8	Olig2	SYBR	11287.6	10196.7	9046.31	8105.35	7565.64	7481.94	7786.18	8354.27	9081.3	9928.14	10923.1	12127.3	13584.6	15284.1	17152.1	19076	20939.9	22656.6	24177.9	25490.7	26605.5	27543.4	28327.8	28976.5	29496.2	29880.3	30113.8	30186.9	30109.3	29917	29665.9	29416.2	29212.1	29070.4	28979.2	28909.4	28832.2	28732.9	28612.5	28477.9	28327.2	28144.4	27909.1	27614.6	27281.6	26958.4
9	A9	Olig2	SYBR	10480	9470.95	8433.18	7614.14	7184.77	7189.18	7560.25	8176.94	8925.34	9737.84	10605.8	11570.9	12701.6	14061	15674.5	17507.5	19463.4	21405.6	23196.3	24732.7	25968.9	26913.1	27610.4	28118.4	28491.2	28770.8	28986.6	29157.2	29292.7	29396.2	29465.2	29493.3	29471.2	29390	29246.4	29049.1	28821.1	28595.6	28404.8	28268.9	28191	28159.2	28151.8	28143.1	28109	28032.5
10	A10	Olig2	SYBR	13724.7	12994.8	12140.8	11323	10670.9	10247.7	10066.8	10140.1	10516.2	11268.7	12440.6	13987.5	15764	17570.1	19223.3	20615.4	21728.5	22622.6	23410.3	24223.4	25170.6	26293.5	27549.7	28834.3	30025.1	31017.8	31734.6	32120.2	32146.9	31835.6	31273.1	30610.8	30034.2	29706.4	29705.8	29987.1	30394.1	30724	30813.8	30604.9	30154.4	29593.5	29061.6	28650.2	28382	28226
11	A11	Sox2	SYBR	6440.63	5036.48	3610.02	2500.5	1938.15	1980	2535.58	3446.17	4564.21	5795.02	7098.55	8469.58	9918.06	11458.1	13103.1	14857.8	16706	18598.6	20454.5	22176.4	23677.2	24904.2	25852.9	26559.8	27083.3	27479.3	27784.2	28013.7	28170.1	28252.7	28262.7	28203.8	28080.8	27903.1	27686.1	27454	27236.7	27064	26957.2	26921.2	26942.2	26991.7	27038.8	27060.9	27051.2	27017.2
12	A12	Sox2	SYBR	8149.14	6362.76	4395.06	2691.46	1629.06	1406.41	2022.61	3326.94	5096.72	7103.17	9155	11120.6	12935.5	14597	16144	17629.1	19087.3	20514.9	21865.7	23063.8	24032.2	24724.1	25146.2	25360.1	25459.6	25533	25631.8	25762.5	25903.3	26026.2	26111.7	26149.1	26133.6	26068.3	25968.8	25863.9	25783.8	25747.8	25753.8	25779	25788.6	25749.4	25643.3	25476	25275.3	25076.4
13	B1	Olig2	SYBR	13927.3	13332.2	12601.6	11874.3	11288.1	10940.5	10871.9	11073.4	11510.7	12149.8	12974.3	13991.3	15220.7	16677.7	18352	20194.6	22116.1	24000.4	25728.8	27205.8	28380.4	29256.4	29886.3	30351.3	30729	31067.1	31371.3	31611.6	31738.4	31700.7	31465.5	31043.2	30501.6	29959.2	29544.4	29340.7	29347.5	29482.1	29622.7	29670.6	29595.7	29444.2	29306.3	29264	29345.5	29511.9
14	B2	Olig2	SYBR	13346.8	11801.6	9937.42	8172.39	6918.27	6430.88	6752.07	7754.68	9244.35	11041.8	13012.5	15060.5	17113.9	19116.8	21026.4	22810.1	24452.3	25963.5	27384.7	28771.7	30163.3	31549.8	32866.2	34014	34902.1	35484.6	35775.2	35836.7	35755.7	35608.8	35432.2	35211.1	34901.7	34477.8	33971.6	33474.6	33093	32887.6	32839.5	32866.5	32873.1	32801.3	32652.7	32472.4	32315.2	32213.2
15	B3	Olig2	SYBR	13717.6	12972.3	12104.6	11280.7	10628.5	10203	10005.3	10028.4	10297.7	10872.3	11819.3	13180.8	14951	17075	19452.9	21955.3	24437.8	26766.1	28837.3	30592.1	32007.2	33078.7	33809.9	34216.1	34339.7	34255.1	34060	33852.9	33710.2	33671	33729.4	33836.3	33913.5	33883.1	33701.2	33380.6	32984.8	32595.4	32271.6	32027.1	31835.9	31660.6	31478.9	31292.6	31116.8	30967.5
16	B4	Sox2	SYBR	14283.7	13384.6	11993.3	10338.6	8729.49	7443	6651.61	6428.9	6809.86	7845.06	9598.22	12089.2	15225.4	18777.7	22422.9	25833.4	28764.7	31102.6	32863.2	34160.4	35160.5	36033.3	36901.1	37802.9	38690.9	39468.2	40048	40397.1	40540.8	40536.5	40439.3	40286.7	40102.6	39907.5	39723.1	39571.7	39473	39436.3	39448.1	39463.8	39418.3	39264.6	39018.3	38773.6	38668.7	38818.2
17	B5	Sox2	SYBR	10432.9	8801.43	6878.99	5046.92	3656.83	2933.78	2950	3663.93	4981.53	6799.97	9022.63	11555.1	14301.9	17170.3	20072.7	22922.4	25625.1	28083.8	30213	31956.2	33292.2	34236.5	34839.2	35185.2	35382.9	35538.1	35722.1	35957.2	36225.9	36496.4	36737.1	36918	37003.7	36957.9	36761.2	36433.4	36043.1	35693.8	35487	35478.7	35649.2	35907.4	36131.1	36226.1	36171.6	36027.9
18	B6	Sox2	SYBR	11939.1	9773.83	7352.2	5186.5	3683.21	3036.4	3254.18	4258.25	5960.85	8269.38	11050.1	14115.2	17258.3	20308.1	23153.5	25725.7	27965.5	29816	31245.5	32281.1	33019.6	33603.1	34168.6	34797.2	35484.9	36150.8	36681.9	36992.5	37064.8	36954.7	36755.4	36551.6	36388.8	36269.5	36169	36054.1	35894.8	35674.2	35398.6	35104.8	34855.1	34716.6	34732.6	34900.9	35173.8	35487.3
19	B7	Olig2	SYBR	14636.6	12751	10609.5	8674.75	7338.38	6803.19	7074.83	8037.84	9550.4	11498.8	13800	16371.7	19105.3	21858.8	24473.4	26799.9	28724.8	30188.7	31194.4	31804.1	32124.8	32280.7	32379.1	32483.2	32601.9	32703.3	32740.7	32678.9	32510.1	32256.7	31963.3	31679.9	31444.8	31270.6	31142.2	31029.3	30904	30754	30584.5	30411.3	30250.4	30112.7	30002.6	29919.5	29860.5	29820.7
20	B8	Olig2	SYBR	17237.9	14992.9	12419	10056.4	8382.83	7681.46	8021.46	9321.18	11425	14139.7	17239.2	20467.4	23568.1	26334.8	28649.1	30486.9	31889.1	32921.3	33642.9	34097.2	34317.1	34334.7	34186.2	33912.4	33560.6	33183.4	32837	32571.2	32416.5	32371.3	32401.6	32452.2	32470	32426.4	32326.4	32196.9	32065.4	31941.8	31819	31688.7	31557.3	31447.9	31384.3	31373.8	31398.2	31420.4
21	B9	Olig2	SYBR	16295	14575.1	12623.6	10870.2	9685.36	9266.07	9618.96	10626.6	12138.3	14025.4	16184	18507.2	20862.6	23101.7	25093.6	26762.8	28104.8	29172.7	30044	30784.7	31425.8	31960.3	32357.6	32587.2	32639.1	32532.5	32309.3	32021	31715.8	31432.4	31195.2	31010.5	30866.6	30740.6	30609.3	30458.3	30282.9	30083.3	29860	29613.6	29346.3	29067.3	28797.1	28568.4	28418	28371.2
22	B10	Olig2	SYBR	14360.3	12456.4	10499	8990.92	8308.63	8578.21	9669.89	11288.2	13097.2	14829.2	16351.5	17681	18943.2	20294.5	21839.5	23582.8	25425.1	27197.1	28707.8	29796.3	30379.2	30476.9	30204.4	29724.3	29190.9	28716.9	28372.7	28199.8	28214	28396.8	28683.2	28965.1	29110	29004.5	28604.5	27969.4	27252.8	26645.1	26293.7	26243	26426.7	26711.2	26962.3	27099.4	27111.3	27036.4
23	B11	Sox2	SYBR	8309	6379.35	4093.44	1905.8	218.066	-732.809	-880.152	-258.019	1076.97	3080.55	5707.11	8871.2	12416.2	16112.8	19691	22897.7	25554.3	27593.5	29058.6	30073.3	30796	31377.3	31926.6	32492.5	33059.4	33562.1	33914	34041.8	33915.5	33563.9	33071	32550.1	32111	31826.4	31713	31728.2	31783.6	31773	31609.5	31259.6	30757	30187.6	29651.9	29226.2	28940.4	28780.5
24	B12	Sox2	SYBR	5981.27	4411.37	2752.3	1377.31	534.322	273.661	492.468	1050.06	1872.48	2987.84	4487.19	6449.6	8877.77	11674.9	14663.4	17630.9	20382.7	22782.5	24772.2	26364.7	27619.5	28605.9	29375.1	29950.6	30337.3	30543.6	30594.9	30531.2	30393.7	30212.4	30007.2	29795.4	29595.5	29423.3	29282.6	29160.6	29034.5	28882.5	28693.1	28470.5	28232.9	28007	27815.6	27666.1	27544.7	27424.1
25	C1	Olig2	SYBR	12125.8	11350.6	10480.2	9698.57	9137.83	8847.38	8826.32	9074.16	9606.95	10427	11486.8	12697	13977.6	15307.6	16726.9	18289	20009.4	21847.8	23729.4	25576.5	27321.5	28899.6	30239.1	31268.8	31939.9	32246.2	32232.4	31983.4	31600.5	31168.9	30732.1	30292.1	29840.6	29400.9	29043.4	28852.3	28865.2	29028.9	29206.7	29236.5	29006.6	28507.3	27833.7	27144.3	26595.8	26287.3
26	C2	Olig2	SYBR	14045.4	12651.4	11153.4	9888.31	9103.69	8886.95	9185.63	9885.77	10888	12143.6	13643.7	15388.6	17357.4	19494.4	21713.2	23913	25997.6	27892.9	29561.2	31006.2	32266.2	33387.2	34393.4	35268.8	35966.5	36441.6	36683.2	36725.8	36635.4	36479.8	36302.3	36115.2	35915.5	35706.1	35505.5	35338.3	35213.9	35114.4	34998.8	34825	34576.1	34274	33971.4	33724.1	33560.3	33466.8
27	C3	Olig2	SYBR	21472.6	20023.7	18339.9	16790.8	15727	15364.1	15731.7	16701.7	18071.8	19660.3	21363.5	23157.3	25048.6	27018	28986.2	30827.5	32415.4	33669.4	34578.9	35192.9	35592.7	35861.4	36063.1	36229.4	36360	36430.7	36408.7	36266	35991.4	35598.3	35133.8	34676.9	34318.5	34125.6	34107.1	34205.3	34324.8	34378.2	34327.3	34188.4	34010.7	33842.3	33709.2	33614.9	33552	33511.8
28	C4	Sox2	SYBR	8213.74	7336.94	6113.44	4716.46	3345.47	2175.94	1336.7	923.169	1032.24	1788.85	3333.85	5759.83	9026.1	12908.5	17032.9	20981.8	24423.1	27191.3	29296.1	30871.9	32102.5	33148.3	34095.2	34941.4	35632.9	36126.4	36441.3	36657.6	36865.2	37102.5	37335	37485.8	37490.6	37336.1	37062.7	36742.1	36450.9	36250.8	36173.2	36208.9	36315.7	36451.5	36616.7	36870.8	37297.7	37941.6
29	C5	Sox2	SYBR	12665.2	10323.7	7774.83	5606.55	4284.07	4007.01	4709.93	6171.55	8148.65	10458.8	12995.3	15694.3	18495.1	21322.3	24094.5	26742.4	29214.5	31462.1	33423.6	35036.9	36277.8	37192.2	37883.2	38453	38943.2	39321.4	39528.1	39537.7	39385.3	39143.7	38880.2	38631	38408.7	38224.2	38096.8	38040.2	38040.6	38049.7	38007.7	37882.1	37696.6	37529.2	37475.7	37601.3	37908.8	38346.6
30	C6	Sox2	SYBR	16934.9	14446.3	11707.2	9352.43	7898.16	7585.24	8374.58	10060.5	12391.2	15128.4	18047.8	20933.5	23604.6	25956.6	27977.2	29717	31234.7	32559.9	33691.5	34622.9	35371.2	35982.8	36518.4	37021.9	37498.6	37916.7	38234.3	38432.9	38533.5	38582	38616.2	38641.2	38631.3	38558.2	38418.3	38238.2	38058.9	37910.3	37803.2	37735.2	37704.6	37713.2	37757.6	37816.7	37854.9	37848.2
31	C7	Olig2	SYBR	15379	12979.3	10237.6	7736.19	5991.23	5302.99	5726.11	7135.46	9323.39	12069.4	15167.6	18426.4	21668.9	24740.5	27522.4	29939.1	31954.4	33559.2	34756.1	35549	35943.8	35960.4	35651.7	35115.3	34483.7	33895.1	33456	33215	33156.3	33214.1	33299.8	33333.7	33272.1	33118.9	32918.2	32729.1	32596.2	32531.2	32513	32503.5	32467.1	32381.3	32238.6	32041.6	31799.4	31528.7
32	C8	Olig2	SYBR	20327	18007.6	15470.6	13304.3	11991.6	11759.8	12569.6	14213.8	16435.2	19000.4	21710.4	24385.6	26861.4	29007.9	30757.5	32114.7	33138.1	33904.9	34477.7	34890.9	35158.4	35289.3	35298.3	35206.7	35039	34819.8	34575.4	34333.9	34120.6	33949.1	33813.7	33690.9	33552.7	33383.2	33188.3	32989.4	32808.3	32653.2	32517.9	32392.4	32274.6	32172.5	32096.9	32050.9	32025.1	32000.2
33	C9	Olig2	SYBR	13994.1	11462.9	8586.57	5963.26	4113.11	3343.3	3728.22	5170.98	7477.79	10412.9	13726.5	17179.8	20565.3	23725.1	26550.7	28971	30931.1	32388.5	33325.1	33771.4	33817.4	33598.6	33260.7	32922.4	32655.5	32484.4	32404.1	32398.1	32448.3	32537.4	32643.3	32735.3	32774	32717.7	32537.4	32234.5	31850.8	31460.1	31140.8	30945.4	30882.2	30917	30987.4	31024.5	30972.1	30806.2
34	C10	Olig2	SYBR	17427.5	15610	13465.1	11452.1	9994.49	9345.57	9556.4	10537.7	12152.7	14272.1	16770.9	19493.8	22237.8	24775	26906.4	28515	29591.2	30220.3	30545.1	30715.2	30843.5	30984.2	31135.4	31264.8	31336.6	31326.7	31222.3	31017.8	30717.2	30343	29940.3	29568.5	29281.6	29109	29044.5	29050.2	29069.4	29045.4	28937.5	28731.2	28439.8	28098.3	27751.4	27440.7	27193.8	27020.4
35	C11	Sox2	SYBR	7962.37	5442.21	2593.68	-9.34529	-1898.14	-2821.41	-2730.82	-1693.62	189.227	2816.99	6081.78	9845.57	13925.4	18097	22119.2	25768.2	28869.6	31315.4	33069.5	34165.7	34707.4	34862.2	34842.7	34860.5	35063.8	35483.5	36020.1	36486.3	36692.2	36528.5	36010.1	35264.4	34478.6	33838.7	33476	33430.9	33641.2	33965.3	34237.8	34335.6	34215.6	33912.1	33496.6	33037.9	32578.8	32140.5
36	C12	Sox2	SYBR	8666.19	6490.3	4115.66	2073.19	772.964	383.251	843.707	1976.04	3604.6	5620.32	7973.09	10624.9	13504.4	16489.3	19419.1	22128.4	24483.9	26414.1	27918.6	29057.7	29924.1	30609.1	31176	31649	32020.7	32273.3	32397.5	32402.8	32313.9	32161.9	31978	31792.1	31629.6	31504.8	31413.9	31333.7	31231.4	31081	30878	30642	30408.3	30211.5	30069.8	29976.8	29904.1	29815.2
37	D1	Olig2	SYBR	15455.3	14115.9	12583.6	11170.2	10131.3	9609.31	9652.3	10266.6	11433.4	13084.2	15072.1	17191.6	19246.3	21117.7	22785.2	24295.2	25710.8	27080.9	28434.4	29781.8	31108.5	32364.3	33468.3	34333	34898.9	35155.7	35142.1	34929.5	34598.6	34212.1	33796.3	33340.8	32829.9	32286.3	31790.3	31449.5	31329	31392.3	31499.7	31472.8	31188.2	30642.9	29956	29307.3	28851.4	28653.9
38	D2	Olig2	SYBR	15716	13905.6	11962.3	10337.8	9379.35	9222.57	9798.09	10922.9	12406	14115.6	15990.8	18013.7	20169.4	22414.4	24668.5	26828.6	28794.6	30495	31897	33005	33850.7	34479.8	34941.8	35281.7	35531.2	35708	35817.6	35863.5	35852.5	35792.5	35684.9	35521.4	35295.2	35017.5	34727.8	34480.9	34318.4	34243.7	34216.8	34174.7	34064.2	33869.2	33614.3	33347.2	33109.3	32916.9
39	D3	Olig2	SYBR	17594.5	15994.6	14071.7	12223.1	10826.9	10121.8	10165.5	10879.3	12134.5	13826.5	15900.8	18327.6	21053.7	23966.1	26892.5	29636.4	32025	33946.4	35360	36286.7	36791.9	36969.9	36926.5	36756.1	36522.1	36249.4	35936.3	35575.2	35167.2	34727.4	34281.3	33862.3	33508.7	33255	33119.2	33091.6	33137.3	33215.4	33299.6	33386.2	33478.2	33565.8	33615.7	33584.5	33443.9	33203
40	D4	Sox2	SYBR	11102.4	8405.82	5546.25	3171.7	1780.44	1588.64	2536.11	4382.33	6820.29	9562.42	12391.7	15183	17893.4	20526.4	23084	25532.3	27798.5	29801.1	31489.5	32867	33980	34889.8	35646.1	36283.2	36829.4	37311.3	37745.7	38124.4	38414.5	38582.9	38630.8	38614.4	38629.4	38765.4	39055.4	39455.6	39869	40206.2	40440.3	40620	40829.1	41119.7	41467.6	41787.8	42001.7	42111.3
41	D5	Sox2	SYBR	10798.8	8424.25	5798.71	3496.73	1984.83	1486.94	1981.49	3297.93	5234.93	7634.79	10394	13430.3	16647.2	19923.6	23131	26158.3	28917.4	31331.5	33320.4	34813.5	35786.1	36295.5	36488.1	36559.3	36685.9	36962.3	37375.4	37830.5	38207.8	38421.4	38445.4	38304.2	38047.1	37729.5	37408.8	37141.7	36976.6	36939.3	37026.4	37207.8	37436.6	37657.9	37816.3	37865.5	37787.2	37610.9
42	D6	Sox2	SYBR	10785.3	8678.26	6262.57	4026.58	2383.39	1565.58	1631.18	2538.92	4217.34	6578.54	9491.07	12759.9	16146.9	19428.1	22450.3	25147	27514.1	29567.6	31317.8	32770.9	33945.1	34878.3	35618	36203.9	36659.7	37005.2	37275.3	37524.9	37807.3	38139.2	38477.3	38733.1	38824.7	38731.3	38514.2	38285.1	38143.4	38125.6	38198.2	38290.1	38337.2	38308.9	38207.1	38048.4	37850.1	37632.6
43	D7	Olig2	SYBR	20180.7	17578.1	14619.6	11976.5	10259.3	9826.27	10719.5	12725	15488.7	18627.6	21800.5	24745.2	27296	29383.5	31018.8	32259.8	33175.9	33823	34240.2	34463.2	34535.9	34511	34435.1	34333.4	34204.4	34029.7	33792.6	33496.1	33168.9	32859.8	32618.2	32471.6	32409.7	32386.8	32339.5	32217.4	32005	31728.9	31441.1	31192.3	31004.5	30863.9	30733.7	30584.2	30417.2	30268.9
44	D8	Olig2	SYBR	18742.4	16397.3	13782	11475.7	9968.83	9520.11	10142.4	11687.2	13943.3	16690	19700.8	22734.2	25551	27959.3	29862.9	31279.1	32311.7	33092.8	33726.5	34260.3	34690.5	34986.4	35116.6	35065.2	34842	34485.8	34065.8	33671	33387.8	33269.9	33315.6	33467.7	33641.4	33764.8	33808.4	33786.6	33733	33671.1	33599.8	33499.7	33352.3	33156.5	32933.1	32715.6	32533	32394.9
45	D9	Olig2	SYBR	15007.4	12940.3	10696.8	8786.27	7623.02	7409.35	8126.16	9602.5	11602.6	13891.5	16267.5	18572.1	20690.7	22548.5	24104.7	25342.7	26260.3	26863.4	27168.5	27212.1	27058.2	26792.6	26505.4	26268	26116.8	26051.9	26048.6	26074.6	26104	26122	26124.4	26110.2	26075.7	26009.8	25895.1	25717.8	25478.5	25200.4	24922.9	24686.5	24515.3	24408	24341.2	24279.8	24192.4	24064
46	D10	Olig2	SYBR	17698.8	15603.3	13275.1	11243.1	9949.02	9611.26	10206.8	11556.9	13440.8	15672.2	18114	20654	23173.5	25541	27627.2	29335.4	30622	31502.3	32038.8	32318.3	32430.9	32452.5	32434.5	32402	32359	32297.4	32206.1	32076.1	31901.9	31684.2	31430.6	31155.5	30875.9	30606.8	30358.6	30137.6	29945.6	29775.9	29608.3	29412.7	29163.8	28857.9	28520.3	28196.7	27932.4	27752.6
47	D11	Sox2	SYBR	8033.91	5916.91	3536.95	1396.08	-107.216	-786.898	-652.695	191.238	1646.86	3663.61	6216.77	9256.8	12672	16286.9	19891.2	23279.2	26280.3	28771	30677.9	31981.3	32724.8	33023.3	33052.5	33011.4	33063.9	33284.5	33637.4	34000.7	34225.3	34197.9	33883.5	33334.6	32670.9	32044	31593.6	31405	31480	31736.5	32041.6	32260.9	32304.1	32144	31809.1	31360.9	30868.5	30391.2
48	D12	Sox2	SYBR	6635.68	4744.99	2706.05	970.598	-128.785	-473.512	-133.243	739.351	2017.02	3646.62	5632.03	7981.44	10658.7	13563.7	16544.6	19430	22065.9	24346.4	26226.5	27718.1	28870.3	29746	30399.7	30866.3	31164.3	31309.1	31326.4	31252.4	31123.9	30964.5	30781.3	30574.6	30350.1	30123.6	29915.3	29738.9	29594.4	29467.6	29337.9	29188.9	29017.4	28833.1	28650.4	28474	28294.1	28091.1
49	E1	Olig2	SYBR	13186.9	11798.6	10297.7	9032.71	8258.81	8060.81	8381.97	9115.91	10184.1	11548.9	13172.9	14977.2	16837.5	18619.7	20230	21649.4	22934.3	24186.3	25500.2	26907.9	28347.1	29676.1	30735.3	31424.1	31748	31808.3	31743.6	31659.7	31584.6	31465.8	31208.7	30742.3	30084.3	29366.9	28792.8	28536.7	28641.2	28976.5	29293.6	29345.5	29006.6	28326.3	27496	26757.6	26303.5	26212.1
50	E2	Olig2	SYBR	12490.2	10540.9	8436.6	6652.41	5550.24	5268.78	5736.76	6777.54	8225.74	9990.47	12049.4	14399.5	17006	19773.2	22547.6	25148.3	27413.6	29241.3	30605.9	31546.5	32140.7	32480	32655.7	32749.6	32822	32900.4	32980.6	33040.5	33060.8	33033.8	32955.9	32816.3	32600	32307.1	31970.2	31649.8	31404.9	31259.6	31190.7	31145	31069.8	30934.8	30735.3	30481.6	30192.5	29894.5
51	E3	Olig2	SYBR	15507.8	13859.5	11897.2	10035.4	8653.76	7973.03	8024.67	8713.01	9915.87	11558	13621.3	16098.7	18933.1	21989.2	25073.3	27984.6	30560.9	32696.7	34336.6	35467.6	36118.4	36362.9	36313.8	36095.1	35807.7	35505.8	35198.5	34869.2	34498.8	34080.2	33624.6	33163.1	32742.6	32415	32218.3	32160.9	32219.1	32353.1	32525	32708.8	32884.6	33025.9	33095.7	33056.7	32888.9	32602.9
52	E4	Sox2	SYBR	8337.68	5588.47	2620.74	127.091	-1332.34	-1494.25	-407.45	1665.25	4368.83	7348.19	10302.3	13021.4	15414.1	17509.5	19415.6	21243.7	23041.2	24769.4	26332.4	27629.1	28596.1	29233.7	29611.5	29861	30137.3	30553.9	31117.5	31714.1	32166.7	32343.2	32243.5	32010.1	31851.6	31930	32277.7	32791.4	33296.9	33649.6	33813.3	33876.6	33991.7	34268.2	34691.3	35123.9	35407.9	35494.1
53	E5	Sox2	SYBR	9090.34	6122.01	2864.45	54.0844	-1716.59	-2176.68	-1381.35	417.674	2928.16	5915.11	9216.34	12709.9	16276.3	19787.7	23118.6	26164.6	28856.1	31159	33066.1	34583.6	35721.4	36501.4	36976	37244.7	37444	37705.8	38103.2	38622.8	39186.2	39705.7	40135.7	40485.2	40793.1	41094.3	41401.6	41712.1	42024.6	42348.7	42696.4	43060.8	43398.2	43631.6	43684.4	43533.8	43254.3	43025.3
54	E6	Sox2	SYBR	9823.06	6552.4	2943.83	-211.929	-2273.07	-2922.35	-2167.63	-218.894	2644.8	6150	10043	14086.3	18070.1	21834.6	25284.4	28380.4	31116.3	33498.3	35543.9	37288.6	38787.2	40094.6	41236.5	42195.9	42932.9	43424.5	43698.3	43830.6	43911.6	44004.7	44124.2	44245.9	44335.7	44380.8	44403.1	44450.6	44573.1	44798.6	45121.5	45509.8	45919.4	46307.3	46641.6	46908.8	47125.1	47349.4
55	E7	Olig2	SYBR	16286.1	13883	11128.9	8606.75	6829.62	6096.89	6474.06	7861.95	10081.9	12922.8	16150.8	19514.1	22767.4	25708.6	28209.1	30219.4	31753.1	32863.1	33619.4	34096.8	34368.2	34497.9	34538.2	34524.4	34472.3	34381.1	34240	34040.5	33786.7	33499.4	33209.5	32945	32719.7	32530.3	32362.1	32198.4	32027.9	31846.7	31655.7	31455.6	31244.4	31020.1	30787.4	30562.9	30372	30239.1
56	E8	Olig2	SYBR	16898	14860.1	12637.3	10736.1	9559.55	9285.8	9869.96	11142	12915.1	15042	17408.2	19898.4	22380.4	24719.1	26811.9	28616.1	30147.1	31450.3	32568	33517	34285.4	34843.7	35159.9	35217.6	35031.9	34656.6	34178.7	33698.9	33305.9	33052.2	32941.6	32932.1	32958.6	32963.7	32923.3	32849.1	32769.2	32702	32641.8	32563.6	32442.1	32270.9	32070.2	31879	31736.1	31657.6
57	E9	Sox2	SYBR	12923.1	9742.97	6182.29	3013.2	895.14	189.05	931.29	2928.28	5883.08	9483.18	13435.5	17471.1	21351.3	24883.5	27939.7	30463.4	32457.6	33961.5	35027.6	35709.3	36063.4	36156.6	36066.1	35869.3	35628.6	35383.8	35154.7	34950	34774	34628.4	34512.5	34422.6	34346.4	34257.3	34116.6	33891.9	33582.5	33231.2	32909.2	32678.8	32561.2	32529.3	32526.2	32494.5	32396.8	32220.4
58	E10	Sox2	SYBR	11275.4	8855.14	6149.83	3745.28	2132.84	1568.71	2058.15	3438.2	5486.42	8003.12	10840.3	13891.5	17061.9	20240.7	23291.6	26065.9	28434.4	30322.7	31731.4	32730.1	33426.9	33927.8	34303.9	34578.6	34742.5	34780.6	34701.5	34544.1	34362.3	34197.3	34056.5	33912.1	33718.1	33437.9	33067.9	32645	32232.7	31891.1	31646.6	31477.8	31329.3	31145	30900.5	30612.1	30320.2	30058.8
59	E11	Sox2	SYBR	10711.1	8286.9	5539.61	3062.36	1359.34	699.235	1101.43	2422.39	4463.41	7040.32	9999.27	13202.2	16510.3	19779.2	22870	25661.7	28063.2	30017.6	31506.7	32551.8	33215.6	33595.2	33807.6	33963.1	34136.3	34349.7	34574.8	34754.5	34833.3	34780.7	34597.7	34308.9	33948	33550.9	33155.5	32801.7	32524.1	32340.1	32239.5	32185.4	32125.5	32012.1	31818.7	31549.5	31236.3	30924.8
60	E12	Sox2	SYBR	8960.1	6922.65	4659.12	2668.99	1352.66	891.1	1251.44	2283.65	3832.58	5796.18	8118.77	10750	13610.8	16589.5	19561.1	22408.5	25033.5	27355.6	29313	30872.8	32044.8	32885.7	33483.6	33930.5	34295.6	34614.8	34892.3	35110.8	35240.5	35249	35113.3	34836.8	34462.5	34067.8	33740.3	33543.2	33489.5	33540.1	33623.4	33664.2	33607.2	33428.2	33132.3	32745.5	32305.1	31854
61	F1	Olig2	SYBR	13235.7	11520.6	9744.95	8354.61	7655.77	7716.01	8403.33	9514.67	10890.1	12448.1	14146.9	15929.6	17704	19366.5	20848.7	22153.8	23362.7	24606.3	26004	27597.3	29307.2	30950.5	32314.9	33256.8	33764.7	33949.4	33970.8	33948.4	33905.5	33766.9	33412.3	32763.3	31862.6	30899.6	30146.9	29828.3	29989.4	30452.9	30894.8	31000.3	30614.2	29804.4	28816.3	27953.6	27452.1	27403.6
62	F2	Olig2	SYBR	16147.1	14292.4	12342.9	10765	9913.19	9918.67	10692.7	12020	13669.8	15467.8	17312.9	19160.1	20993.5	22803.5	24568.2	26245.3	27779.5	29122.5	30249.3	31162.5	31881.7	32432.3	32840.6	33133.9	33337.2	33466.7	33527.3	33518.6	33443.8	33312.5	33130.7	32893.2	32589.1	32224.3	31840.6	31508.1	31290.7	31207.5	31220.7	31258.2	31250.9	31159.4	30976.8	30716.8	30403.1	30066.8
63	F3	Olig2	SYBR	18434.1	16295.3	13903.4	11815.7	10500.5	10181	10809.9	12165.7	13992.5	16104.9	18411.4	20872.2	23435.2	26002.9	28443.8	30631.5	32475.8	33929.5	34980.5	35644.5	35969.4	36039.3	35962	35839.7	35732.2	35641.2	35522.3	35319.7	34998.4	34562.5	34052.4	33531.1	33066	32712	32497	32415.2	32432.1	32503	32591.6	32678.4	32751.1	32789.5	32759.8	32626.8	32376.8	32033.5
64	F4	Sox2	SYBR	5158.1	1606.74	-2076.69	-4982.71	-6424.85	-6149.28	-4334.23	-1431.38	2030.88	5589.58	8913.05	11815.8	14251.2	16288.6	18064.6	19715.5	21317.3	22865.7	24302.2	25561.1	26605.7	27442.4	28117.2	28703.5	29275.4	29867.4	30442.1	30894.3	31105	31020.2	30702.2	30317.7	30065.4	30083.4	30389.2	30878.7	31381.8	31745.6	31903.8	31898.7	31842	31835	31899.3	31968.9	31958.1	31862
65	F5	Sox2	SYBR	1044.12	-4567.82	-10329.2	-14846.9	-17132.4	-16892.3	-14467.6	-10532.3	-5768.17	-669.881	4490.57	9599.65	14620.7	19533.2	24298.8	28845.9	33070.2	36850.7	40079.4	42687.4	44661.4	46045.7	46935.5	47466.3	47791.2	48047.6	48325.7	48654.2	49013.5	49362.5	49661.9	49883.7	50009.7	50028.3	49935.6	49737.9	49457.5	49133.7	48818.9	48564.8	48409.2	48374.1	48479.8	48768	49315.2	50222.9
66	F6	Sox2	SYBR	1891.36	-2461.02	-6999.38	-10627.9	-12538.3	-12454.5	-10601.3	-7480.61	-3622.64	562.665	4805	8923.7	12777.8	16253.1	19281.9	21860.9	24045.3	25917.8	27554.1	29004.3	30292.1	31422.8	32391	33186.1	33798.4	34230.8	34507.6	34676.7	34797.2	34917.7	35056.3	35196.3	35303.1	35348.1	35326.1	35251.3	35144.5	35026.7	34924.5	34876.9	34927.8	35106.7	35415.8	35840.9	36390	37134.8
67	F7	Olig2	SYBR	16023.9	13739.5	11149.2	8818.65	7241.62	6692.17	7198.17	8612.26	10712.6	13276.8	16109.4	19040.7	21923.3	24633	27077.2	29195.3	30955.4	32346.9	33375.8	34065.9	34459.4	34616	34606.1	34500.9	34363	34237.6	34148.3	34097.4	34070.1	34041	33983.7	33879.4	33725.9	33538.4	33342.9	33164.2	33015.6	32895.4	32787.9	32668.5	32509.5	32288	31998.2	31658.5	31310.4	31003.5
68	F8	Olig2	SYBR	16579.3	14465.4	12125.1	10088.8	8797.76	8466.88	9076.36	10458	12403.5	14726.8	17266.5	19863.3	22352.6	24587.8	26479.5	28015.2	29247.7	30255.1	31102.7	31822.6	32414.9	32861.1	33141.5	33248.8	33195.2	33013.7	32750.2	32455.4	32176.2	31948.5	31788.3	31687.6	31618.8	31548.5	31455.8	31340.8	31219.7	31110.2	31018.3	30935.5	30846	30737.8	30610.8	30477.1	30354.6	30257.5
69	F9	Sox2	SYBR	8203.21	5539.2	2550.12	-125.087	-1949.23	-2637.86	-2174.26	-720.175	1501.94	4290.1	7488.25	10970.5	14615.5	18295.4	21883.3	25268.3	28362.2	31091.6	33390.7	35203.7	36504.8	37315.1	37702.1	37758.4	37578.4	37248.5	36850.4	36462	36147.2	35937.8	35825.9	35773.5	35730.1	35647.4	35488.2	35236	34904.4	34539.5	34204.5	33953.8	33810.8	33761.8	33765.9	33771.2	33726.8	33591.9
70	F10	Sox2	SYBR	9003.11	6807.11	4443.94	2434.26	1169.53	801.181	1262.38	2376.29	3974.06	5957.24	8294.21	10975.1	13960.7	17152.4	20391.4	23482.8	26239.3	28525.5	30289.2	31564.3	32448.6	33067.2	33532.6	33916.8	34242	34495.8	34658.9	34729	34724	34668.5	34573.7	34429.7	34210.5	33893	33479.4	33010.5	32558.6	32198.4	31965.3	31830.4	31712.6	31526.5	31234.1	30865.3	30493	30182.1
71	F11	Sox2	SYBR	8366.32	5775.07	2872.71	291.876	-1442.65	-2066.21	-1580.9	-155.534	1996.63	4689.38	7773.22	11109.4	14549.6	17938.5	21135.4	24035	26571.9	28711.3	30436.4	31748.3	32674.8	33279.4	33658.9	33919.4	34146.2	34378.6	34607.6	34794.9	34900.5	34902.6	34800.2	34604.3	34329	33988.9	33604.5	33207.1	32837.3	32534.7	32323.4	32199.4	32130.1	32065.7	31959.7	31789.4	31564.6	31318.9
72	F12	Sox2	SYBR	6394.51	4886.79	3192.28	1676.61	635.437	206.509	373.223	1038.54	2107.8	3531.12	5293.17	7372.83	9712.44	12214.8	14767.2	17266.7	19629.2	21782	23654	25182	26333.4	27130.4	27653.9	28017	28324.3	28636.5	28960.2	29261.8	29491.3	29602.8	29567.8	29385.6	29091.5	28755	28459.1	28268.1	28199.5	28220.7	28269.2	28281	28211.6	28043.3	27779.1	27437.3	27047.4	26651.3
73	G1	Olig2	SYBR	11263.8	10333	9309.49	8432.36	7887.58	7747.99	7978.77	8491.6	9203.42	10067.7	11070.8	12212.8	13488.2	14878.8	16354.3	17879.2	19419.4	20941.1	22406.4	23766.1	24962.8	25944.6	26683.2	27185.5	27491.2	27658.1	27743.2	27788.5	27818.7	27844.9	27867.3	27873	27833.6	27714.9	27497.1	27195.9	26863.1	26565.7	26355.8	26249.5	26226.2	26246.5	26272.2	26280.3	26263.9	26228.6
74	G2	Olig2	SYBR	12714.7	11040	9343.63	8050.77	7451.96	7612.98	8402.37	9596.18	10986.4	12441.5	13912.1	15403.3	16939.2	18534.5	20181.9	21850.6	23494.7	25058.9	26483.5	27709.2	28686	29384.7	29805.6	29980.5	29966	29829.8	29637.8	29441.8	29273.7	29144.1	29044.2	28952.9	28848.1	28719.8	28576.6	28444	28351.4	28317.3	28339.2	28392.7	28442.4	28459.8	28436.5	28385.2	28326.8	28273.9
75	G3	Olig2	SYBR	15231.2	13341.6	11345.8	9699.11	8734.72	8570.3	9132.28	10254.5	11775.9	13584.5	15608.3	17785.3	20043.2	22296.5	24455.6	26437.9	28177.4	29633.6	30795.8	31676.8	32300.9	32691.2	32867.9	32859	32710.9	32488.5	32258.6	32069.5	31940.1	31861.8	31809.3	31751.6	31660.1	31515.1	31312.2	31064.4	30795.6	30526.3	30260	29983	29678.6	29346.3	29013.2	28725.8	28528.4	28442.2
76	G4	Sox2	SYBR	9337.85	7678.82	5628.15	3608.99	2017.84	1082.43	824.715	1141.51	1941.96	3248.89	5201.27	7952.9	11535.8	15772.9	20297	24662.1	28483.8	31539.9	33798.6	35386.1	36519.9	37424.6	38252.3	39047.6	39775.1	40400.6	40960.8	41562.2	42304.2	43188.6	44089.4	44809.7	45180.1	45139.6	44754.3	44182.6	43612.9	43193.4	42976.5	42900.8	42832.5	42663.8	42407.7	42220.4	42322.8	42872.2
77	G5	Sox2	SYBR	12712.2	9373.14	5756.74	2707.06	899.713	634.696	1824.03	4136.32	7178.97	10620.7	14223.6	17818.2	21267.1	24450.9	27276.6	29695	31704.2	33339.1	34652.9	35705.4	36561.5	37290.5	37954	38584.7	39172.9	39678.6	40066.8	40338.4	40528.4	40676.2	40795.6	40869.5	40871.4	40791.8	40648.8	40479.6	40323.7	40209.3	40149.5	40145.1	40193.9	40297.1	40463	40702	41019.2	41413
78	G6	Sox2	SYBR	10401	7550.27	4426.81	1731.98	26.377	-435.655	292.978	1980.28	4367.01	7256.71	10518.4	14032.6	17644	21162.6	24413.7	27297.8	29813.3	32026.2	34008.5	35786.3	37330.4	38586.2	39518.4	40142.3	40525.4	40764.1	40952.1	41156.5	41408.5	41707.3	42029.9	42343.9	42614.9	42811.4	42909.1	42897.6	42788.9	42623.2	42463	42372.4	42387.9	42498.6	42651.1	42780.8	42855.1	42901
81	G9	Sox2	SYBR	9720.34	7399.92	4800.7	2474.21	868.578	201.185	466.481	1539.68	3288.21	5623.39	8477.59	11751.3	15278.5	18840.6	22216.9	25241.3	27829.4	29973.7	31712.1	33096.1	34167.9	34952.6	35462	35703.3	35694.5	35477.5	35123.9	34722.8	34356.1	34074	33885.5	33767.4	33681	33585.5	33444	33231.9	32945.9	32609.9	32270.1	31975.4	31758.6	31624.3	31551.2	31500.7	31429.6	31302.6
82	G10	Sox2	SYBR	10279.5	8317.03	6153.16	4263.21	3022.37	2595.42	2946.56	3936.65	5429.14	7338.15	9611.86	12187.5	14963.6	17806.8	20582.3	23181.1	25532.1	27599.8	29373.6	30857.9	32067.5	33026.4	33766.4	34320.1	34710.3	34942.6	35014	34928.3	34711.7	34413.8	34095.1	33807.9	33583.2	33425.1	33315.6	33227.1	33136.9	33035.2	32922.5	32800.4	32664.8	32511.1	32342	32170	32006.2	31847.7
85	H1	Olig2	SYBR	6014.12	6090.22	6151.95	6183.1	6177.55	6139.1	6078.52	6010.71	5952.18	5916.71	5910.45	5928.66	5957.8	5981.85	5989.36	5977.26	5951.16	5922.77	5905.47	5907.69	5926.36	5945.61	5943.69	5905.75	5834	5746.77	5667.07	5606.93	5557.2	5489.06	5368.7	5179.51	4939.81	4702.7	4533.23	4474.07	4520.26	4619.38	4697	4691.88	4581.32	4385.42	4151.83	3932.16	3761.71	3650.34
86	H2	Olig2	SYBR	4341.54	4498.59	4668.28	4809.92	4889.65	4890.22	4813.43	4676.57	4506.33	4332.5	4182.13	4074.94	4020.75	4019.74	4065.04	4145.89	4249.78	4363.3	4472.79	4565.25	4630.26	4661.52	4657.87	4622.96	4563.62	4487.85	4402.49	4311.71	4216.78	4116.72	4009.85	3895.77	3776.87	3658.64	3548.11	3450.62	3367	3292.8	3220.88	3145.39	3064.89	2982.41	2902.72	2829.12	2761.56	2697.16
87	H3	Olig2	SYBR	3477.15	3630.09	3758.96	3825.71	3810.94	3718.35	3569.4	3393.96	3222.81	3083.77	2998.76	2980.24	3028.28	3131.05	3269.37	3422.51	3572.22	3704.1	3807.8	3877.43	3912.16	3916.01	3895.99	3859.08	3809.34	3746.66	3668.08	3570.96	3456.26	3330.01	3201.79	3081.3	2974.76	2883.24	2803.41	2730.15	2659.59	2591.23	2528.21	2475.16	2434.85	2405	2377.6	2341.36	2286.76	2211.09
88	H4	Sox2	SYBR	5290.54	5287.35	5244.05	5160.93	5051.83	4938.98	4845.27	4789.05	4782.79	4833.91	4945.04	5112.65	5325.4	5564.53	5807.25	6032.06	6223.06	6372.25	6479.43	6550.47	6594.63	6621.09	6635.44	6637.92	6624.67	6591.39	6537.2	6465.48	6381.76	6290.5	6193.63	6091.46	5984.84	5876.22	5769.02	5665.9	5567.62	5472.91	5379.65	5286.38	5194.4	5109.66	5043.98	5014.26	5039.65	5138.67
89	H5	Sox2	SYBR	4325.77	4413.6	4480.88	4504.64	4476.24	4403.41	4305.5	4205.75	4124.78	4077.1	4069.87	4103.43	4172.94	4270.37	4385.52	4505.88	4616.67	4702.16	4748.8	4748.72	4701.61	4614.57	4499.79	4371.33	4241.74	4119.26	4006.9	3903.38	3805.55	3710.9	3618.69	3529.54	3443.96	3360.93	3277.48	3190.17	3097.45	3001.03	2904.93	2812.66	2724.94	2639.74	2554.52	2468.71	2384.24	2303.86
90	H6	Sox2	SYBR	3859.14	3951.05	4027.08	4060.4	4034.64	3949.66	3821.65	3678.48	3552.1	3471.01	3454.54	3510.23	3634.4	3814.51	4031.92	4264	4486.63	4677.52	4819.72	4904.4	4931.5	4908.12	4845.69	4756.43	4650.59	4534.79	4412	4282.74	4147.39	4007.91	3868.26	3733.27	3606.78	3490.36	3383.47	3284.62	3192.61	3107.07	3028.2	2956.15	2890.12	2827.78	2765.18	2697.49	2619.89	2528.79
93	H9	Sox2	SYBR	6924.86	5189.86	3355.63	1847.69	982.227	874.321	1449.9	2530.49	3927.49	5503.38	7191.4	8984.26	10909.6	12999.1	15260.4	17658.3	20111.3	22507.2	24728.8	26682.2	28313.2	29609.9	30592.8	31300.2	31776.2	32063.7	32203.1	32233.3	32193	32118.9	32038.8	31962	31876.3	31757.3	31585.3	31362.4	31115.3	30882	30693.5	30559	30465.1	30386.7	30300.6	30193	30059.1	29898.1
94	H10	Sox2	SYBR	7014.68	5474.65	3858.41	2539.62	1789.8	1700.06	2197.68	3124.49	4321.39	5682.34	7166.31	8781.93	10557.6	12511.8	14632.9	16872.1	19147	21355.8	23393.7	25172.9	26637.8	27771.6	28593.4	29149.1	29499.5	29709.4	29837	29922.5	29983.5	30018	30013.6	29959	29850.6	29694.5	29503.4	29294.7	29085.3	28889.1	28713.7	28559.2	28417.5	28274.4	28114.2	27926.6	27713.7	27490.7
[truncated: 71 more columns]
