# Supplementary material for: YY1 and CTCF orchestrate a 3D chromatin looping switch during early neural lineage commitment
Source: HighWire-hosted journal article supplement (doi:10.1101/gr.215160.116), 2017-05-23
Supplement: Supplemental_custom_scripts_5C_analysis.zip [file CTCF Encode Data.xlsx]

## Sheet: Expression
Gene_ID	Bundle_ID	Chr	Left	Right	FPKM	FPKM_conf_lo	FPKM_conf_right
CTCF Expression
uc009ndn.1
NM_181322.3
NM_181322
NM_181322	FPKM
mESC-zy27.gene.expr	25.3722
mESC-zy28.gene.expr	23.7332
brain-E14.5-1.expr	30.3989
brain-E14.5-2.expr	22.9242
heart-E14.5-1.expr	12.2521
heart-E14.5-2.expr	16.4089
limb-E14.5-1.expr	19.9285
limb-E14.5-2.expr	18.8353
liver-E14.5-1.expr	18.2651
liver-E14.5-2.expr	18.4263
mef-male1-zy17.gene.expr	8.76973
mef-male2-zy18.gene.expr	12.6952
placenta-1.expr	7.80976
placenta-2.expr	8.39121
testes-1.expr	3.10644
testes-2.expr	4.75506
thymus-1.expr	27.6336
thymus-2.expr	28.9825
boneMarrow1-zy24.gene.expr	17.6186
boneMarrow2-zy26.gene.expr	16.4674
olfactory-1.expr	14.0683
olfactory-2.expr	14.3222
cerebellum1-zy21.gene.expr	11.3369
cerebellum2-zy22.gene.expr	13.04
spleen1-zy8.gene.expr	13.114
spleen2-zy9.gene.expr	11.5327
intestine-2.expr	6.07263
intestine-3.expr	12.4884
cortex1-zy13.gene.expr	6.23119
cortex2-zy14.gene.expr	7.04627
lung1-zy10.gene.expr	6.22081
lung2-zy11.gene.expr	6.96521
kidney1-zy15.gene.expr	6.0953
kidney2-zy16.gene.expr	5.96546
heart1-zy6.gene.expr	4.5347
heart2-zy7.gene.expr	3.90456
liver1-zy4.gene.expr	4.8753
liver2-zy5.gene.expr	3.32659

## Sheet: Binding
Brain E14.5	42342
Heart E14.5	14874
Limb E14.5	31697
Liver E14.5	10803
Cortex	37282
Cerebellum	25803
Olfactory	24243
Heart	35616
Liver	30591
Lung	30567
Kidney	41957
Muscle	0
Pancreas	0
Spleen	25244
Intestine	26795
Testes	31877
Thymus	55453
Tongue	0
MEF	43091
Placenta	15467
Bone Marrow	23326
mESC	38714
