# Supplementary material for: YY1 and CTCF orchestrate a 3D chromatin looping switch during early neural lineage commitment
Source: HighWire-hosted journal article supplement (doi:10.1101/gr.215160.116), 2017-05-23
Supplement: Supplemental_custom_scripts_5C_analysis.zip [file Gene_Expression_Analysis.xlsx]

## Sheet: Beagan_et_al_normalized_10sampl
gene_ID	gene_name	#chr	start_pos	end_pos	ES_Rep1	ES_Rep2	pNPC_Rep1	pNPC_Rep2	iPS_Rep1	iPS_Rep2	ES2i_Rep1	ES2i_Rep2	iPS2i_Rep1	iPS2i_Rep2
uc007aff.2	Mrpl15	chr1	4763278	4775807	10.1424	9.61505	7.56893	8.08776	8.66534	8.85572	9.98528	9.92341	9.53876	9.47115
uc007afg.1	Lypla1	chr1	4797973	4832908	4.0945	3.50652	2.07708	2.48043	2	3.19362	3.29607	3.2647	3.37285	2.67974
uc007afh.1	Lypla1	chr1	4797973	4836816	8.52979	9.19768	6.72093	6.43463	7.07682	6.76761	9.27039	8.22211	8.24568	8.36084
uc007afn.1	Atp6v1h	chr1	5073253	5152630	9.47312	9.07469	7.28653	7.31332	7.3837	7.54797	9.14762	8.97658	8.2358	8.61955
uc007afr.2	Rb1cc1	chr1	6204742	6266185	2.70218	4.24349	3.07708	4.18087	3	2.90411	2.92683	2.21408	3.63589	2.56426
uc007agb.1	Pcmtd1	chr1	7079000	7163709	4.30704	4.50652	3.66204	3.48043	3.32193	1.73419	3.86543	4.21408	4.22085	4.40557
uc007agk.2	Rrs1	chr1	9535488	9537536	10.1179	10.1821	9.23695	9.21514	9.88264	9.80967	10.0147	10.0006	9.71626	9.77615
uc007agq.1	Mybl1	chr1	9658915	9690290	5.2465	4.24349	7.36248	7.00399	3.80735	3.43463	5.05612	4.67351	3.85828	4.14923
uc007agr.1	AK031819	chr1	9710619	9714418	2.43914	2.3366	4.88443	3.65036	2	1.31915	2.6638	0.991685	2.63589	2.14923
uc007ags.1	Vcpip1	chr1	9713277	9738463	7.16434	6.89118	6.53651	6.31332	4.58496	5.16045	6.16842	6.20762	5.93357	5.77372
uc007aha.1	Snhg6	chr1	9932105	9934199	8.89776	8.94393	7.69179	7.84675	7.30378	7.37804	8.87228	8.67351	7.77202	7.77372
uc007ahe.1	Cops5	chr1	10014911	10027979	8.18734	7.42406	5.88443	6.38732	6.59991	6.62901	7.58028	7.2647	6.79239	7.11373
uc007ahf.1	Cops5	chr1	10021000	10027979	4.2465	4.79603	4.07708	4.28779	4.32193	4.48908	4.12323	4.45112	4.05092	4.43873
uc007ahn.1	Arfgef1	chr1	10127587	10222751	4.36514	3.79603	6.247	5.00399	4.85798	4.77858	4.55132	3.86615	4.05092	5.06676
uc007aho.1	AK134369	chr1	10146479	10150141	2.50953	3.14395	4.07708	2.80236	3.70044	4.05612	2.86543	3.10716	2.37285	2.43873
uc007ahs.2	Prex2	chr1	10983545	11293763	3.11722	2.65852	2.07708	0.480432	2	2.31915	4.17476	3.69212	3.95781	3.83728
uc007aif.1	Slco5a1	chr1	12856630	12981216	3.07141	3.50652	3.07708	3.06539	3.32193	3.54154	3.5118	3.16161	2.85828	3.56426
uc007aik.1	Prdm14	chr1	13103508	13117244	6.421	6.09148	2.07708	0.480432	2.58496	4.37804	8.32771	8.5916	8.00512	8.06941
uc007aip.1	Ncoa2	chr1	13156005	13364164	2.50953	3.50652	3.07708	1.48043	2	3.31915	2.6638	3.57665	3.05092	2.43873
uc007aiq.1	Ncoa2	chr1	13172364	13362520	2.50953	2.3366	4.07708	4.28779	3.70044	4.48908	4.04231	3.79904	4.13839	3.56426
uc007air.1	Ncoa2	chr1	13174686	13364164	1.28714	2.3366	3.07708	3.06539	2.80735	2.31915	2.8013	1.40672	3.05092	3.22723
uc007ais.1	AK171953	chr1	13333668	13337135	1.81766	0.336596	4.399	2.80236	1.58496	2.31915	2.42933	1.72865	3.05092	1.56426
uc007ait.1	Tram1	chr1	13554782	13579945	10.0249	10.0965	9.64693	9.53571	9.48985	9.59837	10.7117	10.4193	10.0196	10.0701
uc007aiu.1	Lactb2	chr1	13615979	13650590	8.71061	8.70292	6.83196	6.36307	7.40088	7.20992	9.70546	9.21569	8.68755	8.77372
uc007aja.1	Msc	chr1	14743428	14746047	8.19269	8.2966	2.07708	0.480432	7.20945	7.08292	7.74701	7.89255	6.79239	6.9393
uc007ajg.1	Terf1	chr1	15795738	15812184	4.70218	5.03704	3.07708	4.18087	3.58496	4.12651	5.24876	4.78176	4.80581	4.50286
uc007ajj.1	Gm106	chr1	15843942	15882803	-0.882784	0.336596	2.07708	0.480432	6.44294	6.09174	-1.65813	-0.00831527	4.57449	4.88619
uc007ajl.2	Rpl7	chr1	16091375	16094514	12.9582	12.72	11.8016	12.2151	11.5713	11.5488	12.4055	12.4018	12.0098	12.2708
uc007ajm.1	Rdh10	chr1	16095962	16122631	6.90512	6.60338	5.53651	5.68989	6.55459	6.51555	6.05612	6.10021	5.85828	6.10858
uc007ajq.2	Stau2	chr1	16334278	16509383	4.56016	3.14395	5.07708	4.56789	3	2.31915	4.06979	3.65465	2.05092	3.67974
uc007ajt.1	Ube2w	chr1	16559486	16609367	6.99986	7.10478	6.53651	6.23532	6.40939	6.14358	7.01783	6.53084	6.54278	6.67974
uc007aju.1	Ube2w	chr1	16574238	16609367	1.43914	1.92156	3.07708	2.06539	3	3.31915	4.09676	3.16161	3.51036	2.9793
uc007aka.1	Jph1	chr1	16987544	17087879	5.22574	5.14395	3.07708	2.48043	5.16993	5.48908	4.86543	4.45112	4.13839	4.06676
uc007akv.1	Pkhd1	chr1	20047859	20608138	2.64078	3.50652	2.07708	0.480432	1.58496	2.05612	4.12323	4.28937	5.69478	5.2647
uc007alc.1	Mcm3	chr1	20793094	20810294	12.8795	12.8878	10.9351	11.1555	12.1507	12.1712	12.7166	12.8449	12.4775	12.4705
uc007alf.2	Efhc1	chr1	20941706	20980922	3.50953	3.92156	2.07708	1.48043	2.58496	3.19362	3.47115	3.40672	2.85828	3.43873
uc007alg.1	Tram2	chr1	20991458	21069306	4.91163	5.38099	4.399	4.72836	4.9542	5.68839	5.26073	5.45112	4.22085	4.65173
uc007amb.1	Ogfrl1	chr1	23373262	23390014	5.94376	5.69415	5.88443	5.60971	5.04439	5.64108	5.63649	5.462	4.80581	5.08783
uc007amh.1	Smap1	chr1	23852465	23929128	3.07141	2.65852	3.66204	3.65036	2	2.90411	2.5118	2.21408	2.85828	1.30123
uc007amj.2	1110058L19Rik	chr1	24002777	24012479	6.15064	5.86016	5.77752	6.15286	4.52356	4.94364	5.94178	5.84135	5.80581	5.37162
uc007aml.2	Fam135a	chr1	24017596	24107180	1.70218	1.3366	4.07708	3.48043	2	2.05612	1.8013	0.991685	1.63589	1.30123
uc007amn.2	Fam135a	chr1	24058602	24107180	0.924571	2.65852	2.07708	3.80236	1.58496	3.05612	2.5118	2.31361	2.37285	1.56426
uc007ane.1	Phf3	chr1	30859186	30920101	7.9752	7.70292	7.77752	7.42295	6.47573	6.75656	7.44516	7.28324	7.55077	7.45908
uc007ang.1	Phf3	chr1	30872159	30930717	1.92457	2.3366	3.07708	2.48043	2	0.734188	3.14923	2.86615	2.37285	3.43873
uc007anq.1	Prim2	chr1	33510655	33726603	8.90103	8.7203	7.12147	7.84675	7.48382	7.60455	9.07149	9.02419	8.69478	8.59217
uc007ant.2	1700001G17Rik	chr1	33726668	33727557	2.02411	3.14395	4.07708	3.65036	1.58496	2.73419	1.34187	1.57665	2.37285	2.14923
uc007anu.1	Rab23	chr1	33776740	33783736	4.20468	3.65852	3.07708	1.48043	2	2.05612	3.83372	2.99168	2.63589	1.9793
uc007any.1	Bag2	chr1	33802328	33814595	7.21788	7.30238	7.77752	7.87275	8.89482	8.90911	6.70819	6.76867	7.22085	7.21292
uc007aob.1	Zfp451	chr1	33858804	33871272	5.11722	4.58452	5.98397	5.56789	3.90689	4.12651	4.64565	4.86615	4.85828	3.9793
uc007aof.1	Bpag1	chr1	33965069	34220316	3.43914	3.92156	3.66204	4.06539	3.16992	3.19362	3.89646	4.23961	3.51036	2.88619
uc007aoi.1	Dst	chr1	34068669	34365497	6.92135	6.58452	6.53651	6.48043	5.45943	5.37804	6.59926	6.65465	6.15945	6.44691
uc007aol.1	Dst	chr1	34217176	34240121	4.8854	5.03704	3.66204	4.28779	3.45943	4.05612	5.17476	5.23961	5.47719	5.30123
uc007aon.1	Dst	chr1	34282353	34319096	2.8721	1.92156	4.07708	1.48043	2.32193	3.19362	2.86543	1.86615	3.37285	1.78666
uc007aor.2	Imp4	chr1	34496673	34502592	10.9366	11.0448	9.1105	9.23866	10.6961	10.6229	10.6759	10.8812	10.992	10.8839
uc007aos.1	Ptpn18	chr1	34516590	34530624	2.8721	2.92156	4.07708	1.48043	2.32193	3.19362	2.24876	2.57665	3.22085	2.9793
uc007apf.1	mKIAA1112	chr1	34778768	34869599	2.36514	3.50652	7.88443	8.22862	3.32193	2.90411	1.6638	0.406722	2.85828	1.56426
uc007apk.1	Plekhb2	chr1	34906803	34930801	3.07141	1.92156	3.07708	2.80236	3.16992	2.05612	3.76814	3.57665	2.63589	2.9793
uc007apl.1	Plekhb2	chr1	34906803	34936430	7.80372	7.64948	8.247	8.5028	8.81057	8.9141	7.89262	8.12268	8.35013	8.38657
uc007apn.2	Hs6st1	chr1	36125244	36163291	9.65686	9.81638	8.805	9.09882	10.5934	10.4364	9.69115	9.89205	9.68936	9.5204
uc007apo.2	Ugcgl1	chr1	36196872	36222656	3.47477	4.3366	2.07708	3.93986	4.45943	3.43463	4.49162	3.65465	4.22085	3.88619
uc007apr.2	Uggt1	chr1	36236098	36301147	1.28714	2.3366	2.07708	0.480432	2.32193	-0.265812	1.34187	2.31361	2.37285	1.9793
uc007aqc.1	Lman2l	chr1	36480030	36498424	3.73193	3.79603	2.07708	3.65036	3.90689	3.54154	3.89646	3.53601	3.85828	3.43873
uc007aqg.2	Cnnm4	chr1	36528441	36565621	6.85193	7.06452	6.88443	7.08034	8.56224	8.43809	6.8457	7.21408	6.92129	6.83105
uc007aqq.2	Sema4c	chr1	36605486	36614402	0.439144	0.336596	4.07708	2.80236	2	2.05612	-1.65813	-1.59328	0.0509239	-0.020699
uc007aqw.1	Cox5b	chr1	36748331	36750233	11.247	11.4971	11.2816	11.3102	11.3443	11.2907	10.9916	11.1722	11.6146	11.2919
uc007aqx.1	Actr1b	chr1	36756046	36766770	10.5975	10.6698	10.6507	10.8824	11.0708	11.0033	10.2439	10.5051	10.5144	10.4284
uc007ard.1	Tmem131	chr1	36849033	36996372	9.57152	9.4425	7.7495	7.88982	7.99435	8.34152	9.60279	9.47214	8.55077	8.87109
uc007ari.1	Cnga3	chr1	37276105	37320229	5.892	6.06452	2.07708	0.480432	5.35755	5.19362	6.34187	6.42353	6.98166	6.89219
uc007arl.2	Inpp4a	chr1	37356737	37467580	3.73193	4.50652	4.07708	3.93986	3.32193	2.90411	3.14923	3.79904	2.85828	1.9793
uc007aro.2	6330578E17Rik	chr1	37473929	37486948	10.6346	10.5509	9.07708	9.23866	9.48985	9.67377	10.3419	10.2321	9.82571	9.865
uc007arp.1	Unc50	chr1	37487016	37495969	4.11722	3.92156	4.66204	3.93986	4.58496	4.37804	3.62727	3.86615	3.05092	3.62316
uc007arx.2	2010300C02Rik	chr1	37668520	37776656	0.117216	0.336596	2.07708	2.48043	2.58496	3.05612	-0.658129	-0.593278	1.05092	1.56426
uc007ash.2	Lipt1	chr1	37929050	37933143	6.82112	6.87575	5.399	5.52483	5.72792	5.86347	6.43463	6.02143	6.15945	6.29218
uc007asi.1	Mitd1	chr1	37935734	37947256	6.47036	6.40269	5.07708	5.33841	4.70044	4.37804	5.84967	5.69212	4.75136	5.06676
uc007asj.1	Mrpl30	chr1	37947397	37955178	9.78831	9.58926	9.19602	9.08406	9.19967	9.31915	9.57908	9.6499	9.51853	9.44385
uc007aso.1	Eif5b	chr1	38054854	38112424	6.44365	6.71164	5.53651	5.60971	5.04439	4.64108	6.16205	5.99918	5.66563	5.50286
uc007asq.1	Rev1	chr1	38109630	38145519	3.81766	4.03704	3.66204	3.48043	3.58496	3.73419	3.47115	3.61618	3.22085	3.14923
uc007asr.1	Rev1	chr1	38109630	38186507	6.41642	6.67645	5.07708	4.93986	5.42626	5.22604	5.59926	5.79043	5.13839	5.47115
uc007ass.2	Aff3	chr1	38234171	38721800	6.10021	6.24349	4.07708	2.06539	6.04439	6.14358	4.40796	4.16161	4.44324	4.76066
uc007asx.1	Lonrf2	chr1	38851353	38878060	4.13958	3.92156	7.12147	6.56789	2.58496	3.31915	4.24876	3.99168	3.37285	3.67974
uc007atc.1	Pdcl3	chr1	39044658	39054081	8.67755	8.82444	7.28653	7.3508	7.55459	7.30404	8.29024	8.15491	7.69478	7.54535
uc007ate.2	Gm6635	chr1	39424695	39428211	3.07141	3.14395	3.66204	2.48043	2.32193	3.90411	3.6638	3.2647	3.05092	2.30123
uc007atf.2	Rpl31	chr1	39424695	39428755	7.3388	7.32528	5.98397	6.33841	6.06609	6.00098	7.30477	7.01775	6.72335	6.495
uc007atg.2	Tbc1d8	chr1	39428341	39535592	4.60907	4.24349	5.07708	5.43463	3.16992	3.54154	4.88103	4.23961	3.75136	4.06676
uc007ati.1	D1Bwg0212e	chr1	39592398	39603722	7.28964	7.41341	6.66204	6.60971	6.97728	7.17713	7.20606	7.40108	7.28933	7.2033
uc007atk.1	AK040602	chr1	39604432	39608847	2.02411	2.65852	2.07708	3.06539	1.58496	2.31915	2.92683	2.10716	2.37285	0.979301
uc007atl.2	Rnf149	chr1	39608143	39634192	8.47806	8.40806	7.805	7.59937	8.03342	8.23004	8.73204	8.77523	8.01671	8.13412
uc007auw.1	Pou3f3	chr1	42753990	42757054	1.70218	2.3366	10.2064	10.4705	2.80735	2.31915	2.14923	1.57665	2.05092	2.14923
uc007ava.2	Mrps9	chr1	42908077	42962528	7.72455	7.77954	5.247	6.20835	6.90689	6.84271	7.71474	7.92636	7.24075	7.48313
uc007avb.1	Mrps9	chr1	42919313	42955972	2.76107	2.3366	2.07708	1.48043	3.16992	2.31915	2.98573	3.21408	3.05092	2.88619
uc007avg.1	Tgfbrap1	chr1	43111552	43117778	3.20468	1.92156	3.07708	4.56789	0	3.19362	1.34187	2.40672	2.85828	1.9793
uc007avj.1	AI597479	chr1	43155554	43172791	8.7861	8.83644	8.12147	7.61998	7.58496	7.57339	8.80437	8.58414	8.00512	8.13917
uc007avk.1	Fhl2	chr1	43179918	43220806	3.16161	3.50652	3.07708	0.480432	3.32193	3.05612	1.5118	1.99168	1.63589	1.56426
uc007avm.2	Rpl29	chr1	43245965	43246603	6.5643	6.98045	6.53651	6.9067	7.18982	6.88394	6.8849	6.97278	7.00512	7.06676
uc007avo.2	Nck2	chr1	43502595	43627363	7.73376	7.86798	9.72813	9.98028	8.10329	8.15204	7.5898	7.54883	7.33633	7.25076
uc007avp.2	1500015O10Rik	chr1	43787446	43799409	2.36514	2.3366	7.77752	7.98028	3.32193	3.05612	1.14923	2.57665	3.75136	2.30123
uc007avr.1	Tpp2	chr1	43990851	44013848	0.924571	2.3366	3.07708	2.48043	2.32193	0.734188	2.5118	1.57665	2.05092	2.30123
uc007awb.1	Kdelc1	chr1	44163390	44175618	2.8721	2.3366	3.07708	2.48043	1.58496	2.31915	3.09676	3.16161	1.63589	1.9793
uc007awg.1	AK163166	chr1	44204588	44206367	3.57665	4.42406	4.07708	4.87275	3.58496	3.31915	3.5118	3.57665	3.05092	4.06676
uc007awi.2	Ercc5	chr1	44204588	44238105	5.23616	4.50652	4.88443	5.38732	4	4.12651	4.42933	4.31361	4.69478	4.06676
uc007awq.2	Col3a1	chr1	45368382	45406551	6.24134	6.54605	2.07708	2.80236	8.87344	9.20179	9.19752	9.20519	10.1981	10.0995
uc007awr.1	Col5a2	chr1	45431175	45560127	9.34844	9.17895	7.805	7.93986	9.21432	9.41543	8.47758	8.45385	8.50625	8.6832
uc007awt.1	Wdr75	chr1	45852345	45880458	8.71713	8.5015	6.72093	6.43463	7.27612	7.09174	8.11995	8.11235	7.63589	7.92474
uc007awu.1	Slc40a1	chr1	45964914	45982439	5.41184	5.03704	2.07708	0.480432	3.90689	3.43463	2.24876	2.21408	2.05092	2.78666
uc007awy.1	Dnahc7b	chr1	46292092	46328187	3.28714	1.92156	3.07708	2.06539	2.32193	3.54154	2.92683	2.93028	3.05092	2.14923
uc007axc.1	Slc39a10	chr1	46864388	46910354	7.38868	7.29079	7.46939	6.9067	5.52356	6.20992	7.28731	6.76427	5.95781	6.44691
uc007axj.1	Tmeff2	chr1	50984366	51244114	2.11722	0.336596	5.399	5.06539	4.32193	4.25775	1.8013	1.40672	2.63589	3.06676
uc007axk.1	Sdpr	chr1	51345969	51359804	4.89858	4.65852	4.399	3.28779	4.80735	5.05612	4.04231	3.10716	5.00512	3.88619
uc007axm.1	Nabp1	chr1	51522850	51535243	4.73193	4.50652	2.07708	0.480432	1	2.05612	4.22451	3.65465	2.37285	1.78666
uc007aye.2	Gls	chr1	52220293	52290076	5.64078	5.46588	6.88443	6.54652	6	6.28878	4.5118	4.63554	5.29885	5.59401
uc007ayh.2	Nab1	chr1	52512692	52557292	5.76827	5.95131	7.36248	7.46912	6.14975	6.07404	4.76814	4.97658	4.69478	4.67974
uc007ayl.2	Mfsd6	chr1	52713147	52784162	2.11722	3.14395	4.66204	4.38732	5.88264	5.90411	0.663799	-0.00831527	5.26038	4.95658
uc007ayo.2	Inpp1	chr1	52846263	52874532	5.56016	5.65852	6.247	6.41117	7.82018	7.58594	5.83372	5.41795	5.98166	5.69355
uc007ayp.1	Hibch	chr1	52901889	52977704	5.3746	5.29079	5.399	5.65036	4.08746	3.54154	5.04231	5.48354	4.29885	4.47115
uc007ayq.1	AK217058	chr1	52981746	52982161	4.2465	3.79603	3.07708	0.480432	3.32193	3.73419	3.6638	3.69212	3.37285	4.40557
uc007ayr.1	1700019D03Rik	chr1	52981970	53009684	3.64078	3.65852	2.07708	0.480432	3.90689	3.05612	3.24876	3.36092	3.95781	3.56426
uc007azj.2	Stk17b	chr1	53812355	53842059	6.76827	6.21924	6.325	5.76583	4.52356	5.01959	6.39172	5.7105	5.77884	5.79948
uc007azk.2	Hecw2	chr1	53863717	54251878	4.57665	4.03704	5.77752	5.33841	4.58496	4.68839	4.09676	4.45112	3.85828	4.18875
uc007azp.1	Gtf3c3	chr1	54454424	54495815	8.14097	7.54605	6.93506	6.92338	5.72792	6.54154	7.23061	7.30154	6.69478	6.97365
uc007azw.1	Sf3b1	chr1	55042012	55047959	2.36514	2.92156	4.07708	2.80236	2.80735	3.19362	3.09676	2.86615	3.05092	2.56426
uc007azx.1	Sf3b1	chr1	55042012	55084322	9.14857	8.46072	7.98397	7.95617	6.91886	7.24198	8.28439	8.2205	7.64338	8.1617
uc007azy.1	Sf3b1	chr1	55059947	55084322	5.384	5.72891	4.88443	4.93986	5.78136	5.59217	6.44516	5.55647	5.47719	5.91004
uc007bab.2	Hspd1	chr1	55134677	55144776	13.2071	12.8806	10.5406	10.5425	11.6069	11.598	12.9347	12.7811	11.8518	12.2779
uc007bac.2	Hspe1	chr1	55144991	55148161	12.1672	12.0388	10.6695	10.3933	10.9758	10.8947	11.8345	11.6078	11.6508	11.4583
uc007baj.1	Mars2	chr1	55294020	55296902	8.28087	8.26141	7.325	7.6801	8.23362	8.16464	8.28439	8.11235	8.32239	8.52427
uc007ban.2	Plcl1	chr1	55462789	55811129	0.439144	1.3366	5.88443	5.76583	5.90689	5.98212	-1.65813	-0.00831527	4.22085	4.76066
uc007bax.1	AK016177	chr1	57416065	57434388	3.47477	3.79603	3.07708	2.80236	2.80735	2.54154	4.5898	4.57665	3.51036	3.9335
uc007bay.2	1700066M21Rik	chr1	57434463	57442266	5.1833	5.42406	6.53651	5.9067	3.58496	4.59217	4.92683	5.13464	5.22085	5.02369
uc007bbc.2	9430016H08Rik	chr1	57463391	57472802	8.18061	8.09815	6.93506	7.32592	7.87036	7.54154	8.67167	8.63674	8.35926	8.18632
uc007bbh.2	Kctd18	chr1	58016897	58026928	2.20468	1.3366	4.07708	2.48043	2	3.05612	2.6638	2.99168	1.63589	1.30123
uc007bbj.2	Kctd18	chr1	58020445	58026928	3.60907	3.50652	4.07708	2.48043	2	2.73419	4.22451	4.10716	3.22085	2.56426
uc007bbk.2	Sgol2	chr1	58052817	58083121	3.9752	3.65852	4.399	4.18087	3.32193	2.73419	4.95658	4.47281	3.22085	4.53389
uc007bbl.1	Aox1	chr1	58086812	58163254	2.9752	3.14395	6.16454	5.65036	4	3.90411	3.09676	2.99168	3.75136	3.67974
uc007bbo.1	Aox4	chr1	58267240	58325440	3.28714	2.92156	2.07708	0.480432	2.80735	-0.265812	3.19985	3.21408	4.22085	3.88619
uc007bbu.2	Clk1	chr1	58468831	58480932	4.11722	5.46588	5.07708	2.80236	4.24793	4.59217	5.11006	4.2647	5.13839	4.67974
uc007bbw.2	Ppil3	chr1	58487836	58502273	3.28714	3.3366	3.07708	3.65036	2.58496	3.19362	3.29607	3.10716	3.37285	2.30123
uc007bck.1	Ndufb3	chr1	58643442	58652792	8.31197	8.27323	7.95972	8.10248	7.6865	7.63506	7.88877	8.16495	7.95781	7.95084
uc007bcp.1	Cflar	chr1	58770129	58790071	3.84514	4.03704	4.07708	3.93986	2	3.19362	3.47115	3.16161	2.63589	1.9793
uc007bcr.1	Cflar	chr1	58770139	58779914	2.76107	1.3366	3.07708	3.06539	3	3.43463	1.8013	1.21408	2.85828	0.979301
uc007bcv.2	Trak2	chr1	58957293	59030326	9.36277	9.31388	8.99594	8.79331	8.3966	8.39952	9.31485	9.27168	8.69117	8.79308
uc007bdn.2	Als2	chr1	59248466	59294075	5.25677	4.14395	3.07708	3.06539	5.04439	5.19362	5.52178	5.49418	6.07329	5.57921
uc007bdv.1	Gm973	chr1	59573107	59691353	0.117216	2.3366	4.66204	4.38732	0	-0.265812	1.34187	2.21408	2.37285	2.14923
uc007bdx.1	Sumo1	chr1	59696277	59727678	10.7896	10.5606	8.70643	8.94804	8.52356	8.65603	10.67	10.3819	9.46455	9.80267
uc007bdy.1	Nop58	chr1	59741849	59768354	9.70967	9.20696	8.20636	8.33841	8.38802	8.67377	9.28439	9.20681	8.80247	9.00028
uc007bdz.1	Bmpr2	chr1	59821480	59927703	5.91812	5.92156	7.77752	7.54652	5.2854	5.66493	5.55132	5.44015	5.44324	5.59401
uc007bej.1	Nbeal1	chr1	60237442	60391549	4.20468	4.98045	4.07708	3.80236	3.90689	2.05612	4.95658	4.18808	3.85828	4.30123
uc007bes.1	Raph1	chr1	60540028	60623609	7.41871	7.07806	4.07708	4.93986	5.85798	6.51555	7.15244	7.07206	6.42596	6.47915
uc007bet.1	AK136844	chr1	60540346	60542727	4.54348	2.92156	2.07708	2.48043	4.24793	4.31915	4.12323	3.49418	3.37285	4.06676
uc007bft.1	AK017924	chr1	63161044	63204864	0.439144	2.92156	3.66204	3.06539	1	1.31915	2.5118	1.57665	2.05092	1.56426
uc007bfw.1	Ndufs1	chr1	63203256	63211604	3.02411	3.50652	4.07708	3.65036	2.80735	4.25775	2.86543	2.86615	3.37285	2.88619
uc007bfz.2	Eef1b2	chr1	63223404	63227060	13.6842	13.4894	12.1869	12.2168	12.906	12.9435	13.3313	13.4087	13.3508	13.2544
uc007bgd.1	Adam23	chr1	63492477	63579423	3.47477	3.14395	2.07708	0.480432	2	2.54154	3.6638	3.61618	2.63589	2.30123
uc007bge.1	Adam23	chr1	63492477	63615668	4.8854	5.09148	2.07708	0.480432	3.70044	3.98212	4.84967	4.67351	4.69478	4.62316
uc007bgl.2	Fastkd2	chr1	63777198	63799959	6.15613	5.50652	4.66204	4.38732	4.08746	4.19362	5.18736	5.76427	5.44324	5.99053
uc007bgn.1	AK150559	chr1	64079441	64082160	4.65637	5.03704	6.325	6.09514	3.58496	4.77858	3.86543	4.18808	3.63589	3.78666
uc007bgu.1	Fam119a	chr1	64653053	64663742	2.92457	3.50652	4.88443	4.06539	2	4.19362	3.47115	2.57665	3.05092	2.9793
uc007bgw.1	AK013046	chr1	64726444	64737233	5.76107	5.46588	5.77752	5.76583	5.16993	3.54154	5.37529	5.06493	5.22085	4.22723
uc007bgx.1	Ccnyl1	chr1	64737786	64772216	9.00596	9.04395	8.77752	8.76583	8.64386	8.67377	9.04664	8.88852	8.41287	8.41809
uc007bha.1	Plekhm3	chr1	64835694	65003398	4.93739	4.92156	4.88443	4.48043	4.58496	4.19362	5.48142	5.61618	5.57449	5.43873
uc007bhl.1	D630023F18Rik	chr1	65151858	65169767	3.81766	4.3366	2.07708	1.48043	2.58496	0.734188	4.5317	3.89858	4.37285	4.59401
uc007bhr.1	Pikfyve	chr1	65233258	65279055	3.84514	3.50652	3.66204	3.06539	3.45943	3.43463	4.0143	3.89858	3.05092	3.9335
uc007bij.1	Rpe	chr1	66747457	66761821	3.36514	3.3366	2.07708	2.06539	2.32193	3.54154	4.36424	3.72865	3.85828	3.9793
uc007bir.1	Acadl	chr1	66877426	66909841	7.03309	7.11796	9.00781	8.96425	7.58496	7.73419	6.26073	6.28937	6.84534	7.19362
uc007biw.2	Lancl1	chr1	67047090	67085446	2.92457	3.50652	3.66204	4.38732	3.70044	2.73419	2.6638	3.10716	2.63589	2.30123
uc007bjd.2	Ikzf2	chr1	69577783	69732534	1.57665	2.3366	5.07708	4.87275	2.80735	2.90411	0.926834	2.72865	1.63589	1.56426
uc007bjm.2	Bard1	chr1	71074108	71149546	9.10377	8.9178	6.93506	6.95617	8.33539	8.48238	9.54461	9.43048	8.7686	8.87866
uc007bjp.1	Abca12	chr1	71357547	71461484	2.11722	2.65852	4.07708	3.28779	2.58496	2.31915	2.5898	2.86615	2.63589	2.67974
uc007bjr.2	Atic	chr1	71603729	71609772	5.01203	5.46588	3.66204	2.80236	5.42626	5.3489	6.20606	5.7105	4.69478	5.2647
uc007bjt.2	Atic	chr1	71603729	71625977	11.5547	11.4889	9.28653	9.32278	11.3597	11.2651	11.1292	11.1677	10.9089	10.8181
uc007bju.1	Fn1	chr1	71632096	71699745	5.52661	5.69415	3.07708	2.06539	4.75489	4.68839	4.91173	5.03608	4.29885	5.10858
uc007bkb.1	Fn1	chr1	71650681	71667393	4.84514	5.19458	2.07708	2.06539	4.24793	4.12651	5.08334	5.02143	4.80581	4.81219
uc007bkd.1	Fn1	chr1	71691050	71699745	5.26696	4.65852	3.07708	3.48043	4.70044	4.86347	4.95658	5.06493	5.26038	4.91004
uc007bkg.2	Mreg	chr1	72205806	72258881	10.627	10.6864	6.247	6.48043	8.23362	8.37443	11.5774	11.4678	11.2202	11.234
uc007bkl.2	Xrcc5	chr1	72353994	72441527	10.692	10.3824	7.72093	7.98823	8.17493	8.54476	10.3566	10.1782	9.55674	9.71232
uc007bks.2	Smarcal1	chr1	72629824	72683364	6.74657	6.26733	5.77752	5.93986	5.39232	5.16045	6.52675	6.69674	5.05092	6.01272
uc007bkv.2	Rpl37a	chr1	72757833	72760387	13.1918	13.1975	12.5938	12.8167	12.939	12.8088	12.6987	12.8841	13.1788	12.9573
uc007bkw.1	Igfbp2	chr1	72871076	72899045	11.1544	11.6232	14.3176	14.5551	10.8017	10.9986	11.3951	11.6963	11.388	11.2177
uc007bkx.1	Igfbp5	chr1	72904638	72921439	1.81766	1.3366	7.20636	6.87275	2.32193	2.90411	1.6638	1.86615	2.05092	2.14923
uc007bll.1	Cxcr2	chr1	74200567	74207820	8.53507	8.03704	5.77752	5.65036	7.86419	8.02881	8.60161	8.3797	9.03106	8.42017
uc007blo.1	Arpc2	chr1	74283123	74314787	3.28714	3.79603	3.66204	3.80236	3.80735	3.19362	1.8013	2.72865	2.63589	1.9793
uc007bls.1	Pnkd	chr1	74331607	74334027	6.2205	6.00902	6.66204	6.67026	5.49185	5.77858	5.9492	6.25221	6.24075	6.05612
uc007blv.2	Tmbim1	chr1	74334820	74350910	8.384	8.40806	8.97189	9.14932	9.76487	9.74402	8.27556	8.40954	8.93967	8.68666
uc007bly.2	Slc11a1	chr1	74421776	74432625	4.71713	5.09148	2.07708	0.480432	2.32193	2.90411	4.40796	4.88246	5.00512	5.28308
uc007blz.2	Ctdsp1	chr1	74438182	74443859	8.16434	8.72461	10.0827	10.2219	9.98442	9.71861	8.12487	8.24907	8.40848	8.27162
uc007bma.2	Mir26b	chr1	74440883	74440968	0.702178	0.336596	2.07708	2.80236	3.16992	2.05612	2.04231	1.57665	2.85828	1.9793
uc007bmb.2	Vil1	chr1	74455957	74482134	4.34603	4.14395	3.07708	3.65036	2.80735	2.05612	4.42933	4.33746	3.85828	4.02369
uc007bmf.2	Rqcd1	chr1	74552633	74577416	11.574	11.381	10.0714	9.93164	11.1674	11.1114	11.4946	11.5187	11.3392	11.3125
uc007bmn.1	Zfp142	chr1	74611701	74634602	2.92457	3.65852	2.07708	3.48043	3.45943	3.19362	2.86543	2.86615	4.29885	2.78666
uc007bmy.1	Ttll4	chr1	74708327	74744547	9.74018	9.8103	8.1856	8.30698	9.27845	9.33224	9.31557	9.46944	8.5226	8.69526
uc007bna.1	Cyp27a1	chr1	74760147	74784464	3.2465	3.14395	2.07708	2.06539	2.58496	1.73419	1.92683	2.93028	2.05092	1.78666
uc007bne.1	Wnt6	chr1	74818465	74831893	5.21525	5.42406	3.07708	2.06539	3.32193	3.64108	3.92683	4.02143	4.69478	4.40557
uc007bnf.2	Wnt10a	chr1	74838592	74850749	3.07141	4.3366	2.07708	0.480432	2.32193	3.05612	1.6638	2.49418	1.05092	2.78666
uc007bng.2	Cdk5r2	chr1	74901602	74904306	2.50953	4.03704	4.07708	2.80236	3.80735	2.54154	2.42933	2.65465	3.37285	3.43873
uc007bnn.2	Nhej1	chr1	75013919	75121800	6.67564	6.52642	5.53651	6.56789	6.02237	6.27335	6.5317	6.42353	6.22085	6.47915
uc007bnx.1	Abcb6	chr1	75168214	75176857	8.37342	8.38099	9.33446	9.30061	8.92184	8.80833	8.37805	8.43877	8.66931	8.54345
uc007bny.1	Abcb6	chr1	75174483	75176857	2.70218	3.3366	4.07708	4.18087	2.58496	3.31915	3.38627	3.36092	1.63589	3.37162
uc007bnz.1	Atg9a	chr1	75177438	75186201	1.92457	2.92156	3.07708	3.48043	3	2.54154	1.92683	2.86615	1.63589	1.9793
uc007bob.1	Atg9a	chr1	75177439	75188497	4.26696	4.98045	5.53651	5.56789	5.04439	4.43463	3.29607	3.49418	3.75136	3.9793
uc007bok.1	Tuba4a	chr1	75211548	75215828	11.5924	11.8214	4.66204	4.18087	11.8431	11.77	11.3515	11.5482	11.6716	11.51
uc007bon.2	Dnajb2	chr1	75232997	75242267	3.11722	3.14395	5.399	5.28779	4.32193	4.05612	2.98573	2.79904	3.85828	3.37162
uc007bow.2	Dnpep	chr1	75304514	75313592	3.78964	3.3366	3.66204	2.80236	4.08746	3.82165	2.6638	3.16161	2.37285	2.78666
uc007box.1	Des	chr1	75356918	75364290	7.79317	8.11138	2.07708	3.28779	7.53916	8.06958	7.64565	7.97848	8.92744	8.90411
uc007bph.1	Chpf	chr1	75471143	75475321	2.20468	3.14395	3.66204	4.28779	3.90689	3.82165	2.04231	1.86615	3.37285	1.78666
uc007bpn.2	Obsl1	chr1	75482399	75503027	2.70218	3.79603	2.07708	3.06539	6.06609	5.75656	4.5118	4.57665	5.00512	5.22723
uc007bpo.2	Obsl1	chr1	75487111	75503027	3.43914	3.65852	3.66204	2.80236	4.58496	4.05612	3.95658	3.69212	3.85828	2.67974
uc007bpp.2	Obsl1	chr1	75492914	75500255	3.43914	2.65852	4.07708	4.06539	4.85798	4.77858	2.73419	2.99168	3.22085	3.43873
uc007bps.1	Inha	chr1	75503651	75506929	0.702178	2.92156	4.07708	2.80236	3.70044	3.82165	2.5898	2.86615	3.37285	2.56426
uc007bpz.1	Epha4	chr1	77363759	77511663	8.14788	7.90645	4.399	4.80236	5.55459	5.48908	8.09509	8.05777	6.69478	7.05076
uc007bqu.2	Wdfy1	chr1	79698836	79758344	8.65249	8.55092	7.20636	7.28779	6.85798	6.86347	8.23061	8.20114	7.70914	7.87108
uc007bqy.1	Mrpl44	chr1	79772592	79778020	8.40262	8.23746	7.247	6.92338	7.59991	7.659	8.22299	8.28784	8.14368	7.89816
uc007bqz.2	Serpine2	chr1	79790895	79855240	8.08011	8.03704	13.0565	13.1018	8.35315	8.65305	7.47373	7.19136	7.88381	8.01547
uc007brp.2	Irs1	chr1	82229679	82288014	5.8854	6.11796	9.6545	9.63525	6.79442	6.95336	4.34187	4.21408	5.29885	5.33685
uc007bst.2	Pid1	chr1	84032867	84281220	7.2695	7.09148	7.43463	7.77505	5.39232	4.77858	7.12651	6.84967	6.31771	6.20812
uc007bsw.1	Dner	chr1	84366413	84692796	2.57665	2.65852	7.93506	7.43463	3.16992	2.73419	2.14923	0.406722	2.05092	1.78666
uc007bsy.1	Trip12	chr1	84717763	84835879	10.8656	10.3905	8.81854	8.55725	7.25739	8.41015	10.6621	10.6623	9.72688	10.193
uc007bta.1	AK032919	chr1	84778935	84780873	3.16161	3.65852	3.07708	1.48043	2.32193	2.31915	3.76814	2.79904	2.37285	2.78666
uc007btc.2	Fbxo36	chr1	84836415	84897061	3.89858	4.58452	4.399	5.28779	3.32193	3.64108	5.70819	5.40672	4.85828	4.78666
uc007btd.1	Slc16a14	chr1	84903279	84931658	2.9752	3.3366	3.07708	3.65036	2.32193	2.54154	5.41869	5.2269	4.44324	4.88619
uc007buy.1	Psmd1	chr1	87961193	88035870	10.8564	10.6597	9.66953	9.70443	9.51964	9.57182	10.4872	10.3954	10.0066	10.3324
uc007bva.1	Armc9	chr1	88051354	88066906	2.20468	1.92156	2.07708	3.06539	0	1.73419	1.14923	2.10716	2.37285	1.56426
uc007bvf.1	Armc9	chr1	88051354	88156402	5.35562	5.54605	5.399	4.80236	3.32193	3.73419	4.8176	4.69212	4.90891	4.33685
uc007bvk.2	B3gnt7	chr1	88199795	88203880	10.6361	10.7608	2.07708	0.480432	10.7356	10.6701	10.2458	10.4159	10.5388	10.4767
uc007bvl.1	Ncl	chr1	88241293	88256030	9.90634	9.81638	9.04286	8.77045	8.54689	8.62597	9.9065	9.70249	9.19813	9.3236
uc007bvm.1	Snord82	chr1	88252834	88252902	3.57665	3.79603	3.66204	3.06539	4	3.82165	4.40796	3.10716	3.95781	1.9793
uc007bvp.1	Ptma	chr1	88423310	88427273	14.9056	15.2581	12.738	12.5418	13.8758	13.8663	15.1926	14.8369	14.4822	14.4224
uc007bvt.1	Nppc	chr1	88562865	88567147	0.439144	2.3366	3.66204	3.06539	4.64386	5.64108	1.5118	-1.59328	1.05092	1.78666
uc007bwe.1	AK006434	chr1	89083239	89084978	2.02411	2.92156	2.07708	0.480432	1	2.05612	0.663799	1.72865	2.63589	3.62316
uc007bwl.1	Eif4e2	chr1	89110488	89137063	7.91163	7.89884	7.247	7.05029	7	6.75656	8.10176	7.99918	7.05092	7.69355
uc007bwo.1	Efhd1	chr1	89160938	89207366	3.73193	4.50652	5.07708	5.43463	6.76818	6.75656	3.89646	3.76427	3.63589	3.56426
uc007bwq.2	Gigyf2	chr1	89223572	89254359	2.02411	3.14395	3.07708	0.480432	1.58496	2.31915	2.34187	1.99168	2.37285	0.979301
uc007bwv.1	Gigyf2	chr1	89301568	89315754	2.70218	3.14395	3.07708	2.48043	2.58496	3.05612	2.86543	2.72865	2.37285	3.06676
uc007bxj.1	APG16L	chr1	89652645	89665975	4.95011	4.58452	4.88443	4.72836	4.9542	4.82165	5.21224	5.2647	5.26038	5.04539
uc007bxo.1	APG16L	chr1	89675032	89685119	5.60103	5.19458	5.66204	4.06539	3.58496	3.82165	5.48142	5.36092	5.00512	4.65173
uc007bxp.1	Sag	chr1	89700254	89721875	7.47696	7.00902	5.53651	5.83798	7.29462	7.39952	7.89646	7.94005	8.12774	7.4871
uc007bxq.1	Sag	chr1	89700254	89731971	1.81766	1.3366	3.07708	3.65036	2	1.73419	2.04231	2.99168	2.63589	2.30123
uc007byc.1	Ugt1a7c	chr1	89991575	90116577	2.8721	2.65852	2.07708	0.480432	2.58496	2.05612	0.663799	1.86615	1.63589	1.78666
uc007byd.2	Ugt1a6b	chr1	89999831	90116577	0.439144	0.336596	2.07708	0.480432	6.2854	6.27335	-1.65813	-1.59328	4.69478	5.06676
uc007byj.2	Dnajb3	chr1	90101306	90102323	3.81766	3.79603	5.53651	5.00399	2.32193	3.05612	2.92683	3.21408	3.75136	2.78666
uc007bym.2	Hjurp	chr1	90155430	90174154	4.93739	4.98045	5.247	5.06539	4.75489	4.98212	5.17476	5.2647	5.00512	4.62316
uc007byo.1	A730008H23Rik	chr1	90171695	90172760	6.45261	6.24349	7.325	7.08034	7.56986	7.29643	6.94178	7.03972	6.92129	6.94509
uc007byt.1	Arl4c	chr1	90594800	90598766	7.80372	7.69415	8.05436	8.05029	7.97154	8.31915	5.49162	5.03608	5.69478	5.9793
uc007byu.1	AK019125	chr1	90651464	90652308	5.12844	5.09148	2.07708	0.480432	4.32193	4.68839	5.65475	5.72865	6.55872	6.41393
uc007byv.1	Sh3bp4	chr1	90967036	91050368	10.2244	10.4241	9.66953	9.78193	11.7117	11.6065	10.1338	10.3525	10.5774	10.5675
uc007bzb.1	Gbx2	chr1	91824536	91827751	9.28463	9.39459	5.399	4.28779	8.91289	8.61683	8.40796	8.45793	8.49801	8.34781
uc007bzc.1	AK036422	chr1	91826808	91828437	5.48354	5.92156	5.399	5.52483	6.65821	6.44843	6.06297	6.02877	6.49387	6.38869
uc007bzh.1	Cxcr7	chr1	92100577	92112863	6.083	5.89118	4.399	4.28779	6.75489	6.66493	5.14923	5.12097	4.85828	4.9793
uc007bzi.1	Cops8	chr1	92499999	92509916	10.5962	10.5153	9.56089	9.73546	10.5632	10.5024	10.377	10.464	10.4761	10.37
uc007bzl.2	Col6a3	chr1	92698668	92740505	4.8721	4.86016	2.07708	1.48043	5.12928	5.46211	3.69942	3.05058	3.85828	4.33685
uc007bzx.2	Ramp1	chr1	93076398	93121773	-0.297822	2.3366	8.89725	9.30061	3.80735	3.31915	-1.65813	-1.59328	1.05092	-0.020699
uc007cae.1	Scly	chr1	93194914	93207907	2.02411	3.50652	2.07708	1.48043	2.32193	2.31915	1.8013	1.40672	2.05092	2.14923
uc007caf.1	Scly	chr1	93194914	93217657	6.7861	7.03704	6.247	6.83798	6.82018	7.07404	6.33056	6.45112	6.49387	6.23669
uc007cah.1	Espnl	chr1	93218651	93244880	2.28714	0.336596	3.66204	2.06539	4.45943	4.12651	1.5118	1.99168	3.05092	2.78666
uc007cai.1	Klhl30	chr1	93247649	93258981	0.924571	2.65852	2.07708	0.480432	2.58496	2.54154	1.6638	2.40672	1.63589	2.67974
uc007caj.1	Fam132b	chr1	93263006	93270794	4.421	4.14395	3.66204	3.06539	6.12928	5.96301	3.69942	3.16161	3.63589	3.22723
uc007cak.1	Ilkap	chr1	93270437	93295360	5.36514	5.38099	4.399	3.93986	5.08746	4.82165	4.75126	4.42909	4.13839	3.67974
uc007cam.1	Ilkap	chr1	93277615	93295360	2.11722	1.3366	3.07708	2.48043	2.32193	1.73419	2.14923	2.10716	2.37285	2.14923
uc007cat.2	Hes6	chr1	93308061	93309799	1.28714	3.65852	4.07708	4.28779	2.32193	2.31915	-1.65813	0.991685	2.37285	2.30123
uc007cax.2	Traf3ip1	chr1	93391244	93425884	6.31197	6.29079	4.07708	3.80236	4.75489	4.94364	5.87325	5.84967	5.18021	5.35434
uc007cbd.1	Twist2	chr1	93698053	93744604	4.59295	4.14395	2.07708	0.480432	4.58496	5.16045	1.5118	0.406722	3.63589	3.14923
uc007cbh.1	Ndufa10	chr1	94336295	94370335	11.3541	11.3253	10.99	10.9014	11.1861	11.1931	10.8494	10.9495	11.0516	11.0048
uc007cbs.1	Gpc1	chr1	94728262	94756773	8.57357	8.86407	11.3555	11.491	10.1649	9.9702	7.81963	8.0685	8.12774	8.02915
uc007cbu.1	Dusp28	chr1	94803565	94805197	6.12844	6.44512	5.66204	5.65036	6.83289	6.50237	5.9193	5.96896	6.40848	6.57176
uc007cbv.1	AK017177	chr1	94804956	94807266	2.02411	2.3366	4.66204	4.93986	3.16992	4.12651	2.34187	2.93028	3.37285	2.88619
uc007cbw.2	Rnpepl1	chr1	94807401	94817162	5.1833	6.00902	8.79132	8.68989	8.07146	7.77311	5.00008	5.52566	5.83228	5.73419
uc007cbx.1	Capn10	chr1	94830984	94837549	4.91163	4.86016	4.66204	4.38732	4.85798	4.68839	5.13629	5.44015	5.05092	4.88619
uc007cby.1	Capn10	chr1	94830984	94844525	8.16024	8.3534	8.58487	8.6996	8.33985	8.1854	7.8013	7.94975	8.11701	8.0427
uc007cdl.1	AK086911	chr1	95112475	95127649	2.70218	3.14395	2.07708	0.480432	4	2.73419	4.31915	4.02143	5.22085	5.2647
uc007cdm.1	Sned1	chr1	95132473	95193025	4.78964	5.14395	6.399	5.38732	8.27146	8.09613	4.84967	5.16161	6.57449	6.44691
uc007cdn.1	Snep	chr1	95170625	95174047	0.702178	1.92156	2.07708	2.06539	3	3.64108	0.926834	2.57665	2.05092	1.78666
uc007cdo.1	Mterfd2	chr1	95195787	95202447	7.53084	7.68532	6.07708	6.12429	6.12928	6.42069	7.46599	7.56407	7.51853	7.39293
uc007cdp.1	Mterfd2	chr1	95200074	95202447	5.22574	5.38099	2.07708	4.38732	4.70044	4.37804	5.18736	5.36092	5.13839	5.31915
uc007cdt.2	Pask	chr1	95206013	95239365	3.76107	2.92156	3.07708	3.06539	3.16992	4.05612	3.83372	4.18808	3.05092	3.9335
uc007cdu.1	Pask	chr1	95214404	95240042	4.57665	5.3366	3.66204	3.48043	3.58496	3.98212	5.41869	5.31361	4.13839	4.50286
uc007cdv.1	Ppp1r7	chr1	95240221	95264195	9.08444	8.87187	7.399	7.30061	7.8009	7.84793	8.97305	8.95072	8.19558	8.47516
uc007cdw.1	Ano7	chr1	95270472	95300079	1.57665	2.65852	2.07708	1.48043	2.32193	0.734188	2.24876	1.72865	3.05092	1.9793
uc007cdz.1	Hdlbp	chr1	95325145	95342229	5.13958	5.09148	4.399	4.80236	5.45943	5.05612	5.05612	5.16161	5.00512	5.40557
uc007ceb.2	Farp2	chr1	95408680	95477871	3.50953	4.14395	3.66204	3.28779	3.32193	3.82165	2.8013	2.93028	2.37285	3.37162
uc007cec.2	Farp2	chr1	95408680	95518553	1.43914	1.3366	2.07708	3.48043	3.90689	3.73419	2.34187	2.57665	2.37285	2.14923
uc007ced.1	Stk25	chr1	95517327	95532304	9.25932	9.26733	10.0196	10.2651	10.1611	10.2089	9.37254	9.60394	9.65084	9.59309
uc007cee.1	Bok	chr1	95582270	95592339	7.62104	7.61272	9.01959	9.28779	9.42626	9.26362	7.96575	8.25535	8.31302	8.09304
uc007cej.1	Atg4b	chr1	95651609	95686106	8.9713	8.99123	9.56089	9.6403	10.1586	9.99393	9.09174	9.28784	9.57056	9.552
uc007cek.2	Dtymk	chr1	95689152	95698511	9.81766	9.32812	6.83196	6.93986	8.77149	8.69997	9.80693	9.68691	9.71626	9.62766
uc007cel.1	Dtymk	chr1	95694956	95695940	6.61307	7.00902	5.07708	5.48043	5.39232	4.94364	6.9455	7.05058	6.07329	5.87412
uc007cem.2	Dtymk	chr1	95697071	95698511	7.88209	7.48634	6.93506	7.05029	7.53916	7.54154	7.83172	7.72413	7.46878	7.27392
uc007cey.2	Fam174a	chr1	97210204	97231861	2.70218	3.65852	4.07708	3.06539	5.58496	4.25775	4.29607	2.79904	3.95781	3.88619
uc007cfd.1	AK035520	chr1	98768797	98777807	4.57665	3.65852	4.07708	2.06539	2.80735	2.05612	3.42933	3.40672	3.51036	3.67974
uc007cfg.2	D1Ertd622e	chr1	99540478	99558253	1.28714	1.3366	4.07708	3.93986	2	1.31915	-0.0731664	1.57665	2.37285	1.30123
uc007cgc.1	Cdh20	chr1	106665395	106892058	0.702178	1.92156	8.50334	8.52483	1	-0.265812	2.34187	1.99168	3.22085	1.9793
uc007cgf.2	Pign	chr1	107417716	107560253	4.99986	4.3366	4.07708	4.72836	4.45943	4.86347	5.34187	5.2269	4.29885	4.53389
uc007cgg.2	Pig-n	chr1	107543205	107560253	2.36514	1.92156	3.07708	0.480432	2.80735	2.54154	2.86543	1.21408	2.85828	2.56426
uc007cgj.2	2310035C23Rik	chr1	107560437	107633821	1.11722	2.92156	4.07708	0.480432	0	-0.265812	2.14923	0.406722	2.05092	2.30123
uc007cgp.1	Tnfrsf11a	chr1	107677299	107744558	3.36514	3.65852	3.07708	0.480432	2	2.90411	3.47115	3.21408	3.51036	1.9793
uc007cgv.2	Phlpp1	chr1	108068445	108290822	6.98758	6.90645	9.05436	9.15639	7.77479	7.75656	6.91173	7.08972	6.27974	6.24609
uc007cgw.1	Bcl2	chr1	108434755	108610867	2.28714	0.336596	5.88443	5.48043	2.58496	3.90411	-0.0731664	0.72865	1.05092	1.9793
uc007cgy.2	Kdsr	chr1	108616986	108656319	8.42214	8.35896	6.46939	6.82028	7.41785	7.60455	7.99651	7.7861	7.34554	7.57176
uc007cgz.2	Vps4b	chr1	108667364	108693302	9.23486	8.97684	6.98397	6.95617	7.3837	7.66493	8.63649	8.35217	7.59782	7.98773
uc007chy.1	Dsel	chr1	113755278	113761495	5.36514	5.29079	4.88443	4.80236	4.08746	4.94364	4.86543	4.7105	4.13839	4.33685
uc007cib.1	Tsn	chr1	120195094	120207709	11.1281	10.8835	9.56089	9.69475	10.2408	10.2059	10.9696	10.888	10.3305	10.6009
uc007cic.2	Mki67ip	chr1	120218419	120230408	8.95405	8.67199	7.36248	7.05029	7.49985	7.5286	8.20141	8.14987	7.70198	8.13159
uc007cie.1	Clasp1	chr1	120285634	120404153	3.36514	4.42406	4.07708	4.38732	4.75489	4.82165	4.0143	4.13464	3.63589	4.43873
uc007cih.2	2900060B14Rik	chr1	120355245	120355842	6.15613	5.50652	6.247	6.63018	5.32193	5.51555	5.84967	5.31361	6.27974	5.83728
uc007cil.1	Tcfcp2l1	chr1	120524521	120581745	12.7038	12.5627	2.07708	0.480432	7.65105	8.46551	12.3103	12.3173	10.9912	11.2589
uc007cim.1	Gli2	chr1	120730637	120950196	6.96896	7.41341	4.66204	5.18087	6.71425	6.51555	7.46081	7.45112	7.28933	7.01272
uc007cir.1	Inhbb	chr1	121312041	121318825	8.74018	8.86407	8.72093	8.72836	7.66534	7.72287	10.0783	10.0937	9.76173	9.77534
uc007cis.2	Ralb	chr1	121366881	121401359	9.20733	9.24949	9.247	9.59417	8.86419	9.02881	9.10674	9.00942	9.24075	9.02233
uc007ciu.1	Tmem185b	chr1	121422743	121424803	8.12984	8.25546	8.72093	8.57319	8.78463	8.64708	8.57789	8.53214	9.01093	8.90114
uc007ciz.1	Ptpn4	chr1	121554669	121733648	6.11157	5.29079	6.399	6.12429	5.32193	5.3489	5.9785	5.68285	5.60551	5.51846
uc007cja.1	Tmem177	chr1	121804477	121809745	7.90349	7.71164	7.66204	7.72836	8.2384	7.80028	7.74914	7.8641	8.10621	7.99889
uc007cjd.1	Tmem37	chr1	121963953	121970357	6.84173	6.65852	5.66204	5.97228	6.44294	6.61683	6.31915	6.40108	7.20067	7.09824
uc007cje.1	Dbi	chr1	122009856	122017496	1.11722	2.3366	5.98397	5.23532	3.16992	2.73419	2.34187	1.72865	3.37285	1.9793
uc007cjg.1	3110009E18Rik	chr1	122017763	122084766	0.924571	1.92156	3.07708	3.80236	1.58496	2.05612	0.341871	1.21408	2.37285	2.43873
uc007cjm.2	En1	chr1	122499063	122504568	3.78964	3.79603	4.66204	4.93986	4.45943	4.12651	3.5898	1.86615	3.51036	3.14923
uc007cjn.1	AK138346	chr1	122983981	123017533	0.439144	0.336596	5.98397	5.56789	2.32193	2.31915	0.341871	-1.59328	1.05092	0.979301
uc007cjw.2	Ddx18	chr1	123450411	123464557	11.3167	11.1294	8.92257	8.85981	9.65105	9.70142	11.0787	10.9246	10.1994	10.3164
uc007ckg.1	Slc35f5	chr1	127457592	127492261	7.10306	6.64038	6.88443	6.36307	5.83289	5.90411	5.97123	5.79904	5.63589	6.02369
uc007ckh.2	Gpr39	chr1	127573572	127770438	2.92457	2.92156	2.07708	0.480432	4.39232	4.77858	2.34187	1.86615	2.63589	2.14923
uc007ckp.1	Mgat5	chr1	129101562	129284789	1.11722	1.3366	2.07708	3.06539	2.32193	2.31915	0.663799	-0.00831527	2.37285	0.564264
uc007ckt.2	AK015544	chr1	129380580	129383814	5.78255	5.42406	7.98397	7.92338	7.46761	7.38524	6.00721	5.93028	5.77884	6.19847
uc007cky.1	Ccnt2	chr1	129670740	129692377	5.13958	5.72891	4.66204	4.06539	5.39232	4.86347	5.99292	5.16161	5.75136	5.74749
uc007cla.1	Ccnt2	chr1	129670740	129702509	6.34122	6.40269	4.88443	2.48043	4.16993	4.31915	6.73848	6.06493	5.57449	5.9335
uc007clb.1	Ccnt2	chr1	129693147	129701414	4.98758	5.03704	4.07708	3.48043	3.70044	3.98212	4.92683	4.74657	3.37285	4.50286
uc007clc.2	Rab3gap1	chr1	129765349	129840453	9.05606	8.75866	7.16454	7.20835	7.11894	6.96301	8.66041	8.42492	7.67298	7.79948
uc007cle.1	Zranb3	chr1	129850762	129999578	2.92457	2.92156	4.07708	2.48043	1	2.05612	2.8013	3.10716	3.22085	1.78666
uc007clh.1	R3hdm1	chr1	129999882	130081231	2.36514	3.92156	3.66204	3.28779	2	2.54154	4.40796	3.53601	1.63589	3.67974
uc007clk.1	AK037193	chr1	130068206	130069988	3.02411	0.336596	4.07708	3.06539	2.80735	0.734188	2.42933	3.10716	2.63589	1.30123
uc007cll.1	Ubxn4	chr1	130140757	130175954	8.74566	8.58452	8.325	8.49724	7.85798	8.06958	8.62958	8.6499	7.86471	8.24609
uc007clo.1	Mcm6	chr1	130228169	130256233	5.33638	5.19458	3.07708	3.28779	4.32193	3.64108	5.69942	5.57665	4.85828	4.33685
uc007clp.2	Dars	chr1	130260283	130313993	7.02711	6.35896	3.66204	5.83798	5.52356	5.73419	6.70819	6.66411	5.44324	5.99053
uc007cly.1	Cd55	chr1	132335606	132359317	2.9752	2.65852	2.07708	0.480432	2	3.05612	2.42933	1.86615	3.05092	3.14923
uc007clz.1	Cd55	chr1	132343248	132345390	2.28714	2.3366	2.07708	0.480432	1	2.73419	-0.658129	1.21408	2.37285	1.9793
uc007cmg.2	Pfkfb2	chr1	132588831	132612398	5.13958	4.72891	5.247	3.93986	1.58496	1.73419	3.69942	2.86615	3.05092	3.73419
uc007cmh.2	Yod1	chr1	132613903	132618634	5.31689	5.14395	5.247	5.33841	5.2854	4.90411	5.64565	5.36092	5.26038	4.78666
uc007cmu.2	Il10	chr1	132916421	132921547	2.76107	1.3366	2.07708	0.480432	3	3.43463	1.5118	-1.59328	3.85828	2.67974
uc007cmv.1	Mapkapk2	chr1	132950280	132994120	9.35143	9.4425	10.9351	11.0177	10.7305	10.6679	9.08922	9.26159	9.43894	9.46714
uc007cmw.1	Dyrk3	chr1	133025017	133034811	10.1964	10.2791	7.83196	8.19468	8.80735	8.83222	9.97077	10.0196	9.79912	9.82244
uc007cmy.2	Eif2d	chr1	133049783	133068811	3.6718	3.65852	2.07708	0.480432	2.80735	3.31915	3.42933	3.36092	3.37285	3.43873
uc007cnb.2	Eif2d	chr1	133049783	133076979	4.56016	5.03704	3.66204	3.48043	3.70044	3.82165	3.5898	3.72865	4.51036	3.78666
uc007cni.1	Srgap2	chr1	133191564	133229647	3.89858	3.3366	5.399	5.68989	4.32193	4.19362	3.34187	3.69212	3.22085	3.22723
uc007cnj.1	Srgap2	chr1	133258602	133423938	2.28714	1.3366	4.66204	4.06539	1	1.31915	1.14923	2.49418	2.63589	2.14923
uc007cnk.1	Fam72a	chr1	133424565	133436449	7.09163	7.13101	7.95972	7.9067	7.08746	6.86347	7.09006	6.94975	6.89641	6.71401
uc007cnm.1	Ctse	chr1	133534890	133548122	7.22312	7.40269	8.63167	8.61486	11.7486	11.4467	7.00721	6.97658	9.01671	8.98773
uc007cnt.2	Pm20d1	chr1	133693971	133714692	5.95642	5.98045	4.399	1.48043	4.16993	4.90411	6.04923	5.90657	6.3547	6.36301
uc007cnu.2	Slc41a1	chr1	133724588	133745440	8.89447	9.08143	8.84526	8.89828	10.1573	10.0774	9.28805	9.48354	9.41287	9.4108
uc007cnv.2	Rab7l1	chr1	133763853	133769464	1.57665	0.336596	3.66204	3.28779	2	1.73419	0.926834	2.65465	2.37285	-0.020699
uc007coc.1	Elk4	chr1	133904181	133922261	5.45707	5.54605	6.98397	6.26179	5.45943	6.00098	5.94178	5.69212	4.75136	5.43873
uc007cod.1	Elk4	chr1	133914169	133929187	4.43914	3.79603	5.77752	5.93986	4.39232	4.68839	5.08334	4.59655	4.05092	4.47115
uc007coh.2	Cdk18	chr1	134010123	134036262	6.1059	6.50652	2.07708	1.48043	7.48382	7.16882	6.14277	6.58165	5.93357	5.92182
uc007coi.2	Lemd1	chr1	134088012	134106123	8.09878	8.29079	5.07708	4.72836	8.02237	8.00097	6.49162	6.20114	6.05092	5.38869
uc007con.1	Klhdc8a	chr1	134195202	134203934	5.01203	5.54605	3.07708	2.48043	6.39232	6.3924	3.55132	3.69212	4.29885	4.56426
uc007cot.1	Tmcc2	chr1	134252891	134287858	3.54348	3.50652	4.66204	4.93986	3.80735	4.12651	2.5898	2.86615	3.05092	3.06676
uc007cou.1	Dstyk	chr1	134314029	134363536	7.07722	6.52642	5.399	6.20835	5.32193	5.86347	7.23972	7.30154	6.95781	6.71401
uc007coz.2	Tmem81	chr1	134402806	134405216	5.36514	5.38099	4.399	2.80236	3.70044	3.73419	5.72558	5.78176	4.95781	5.14923
uc007cpi.2	Lrrn2	chr1	134776931	134836582	2.11722	3.14395	8.00781	8.02733	4.70044	3.73419	3.5898	3.40672	4.22085	3.9335
uc007cpj.2	AB349695	chr1	134882796	134885274	7.35801	7.50652	7.12147	6.20835	5.45943	5.54154	7.32486	7.4429	6.65084	7.18387
uc007cpt.2	Ppp1r15b	chr1	135027742	135036377	9.33153	9.17895	8.34386	8.47479	8.87652	8.95093	9.20915	9.24907	8.82241	8.95944
uc007cqk.1	Sox13	chr1	135278876	135320789	3.9752	4.72891	5.88443	5.9067	5.9542	6.31915	3.98573	4.67351	4.37285	4.02369
uc007cql.2	Snrpe	chr1	135500447	135506857	11.2962	10.8796	9.06576	9.32905	9.30834	9.57497	10.9536	10.8779	10.2965	10.2195
uc007cqq.1	Zc3h11a	chr1	135550813	135557957	1.92457	1.3366	2.07708	1.48043	3.16992	1.73419	2.73419	1.86615	2.05092	1.78666
uc007cqr.2	Zbed6	chr1	135552455	135557462	8.3388	8.00902	7.93506	7.46912	5.78136	6.80028	7.9455	7.88246	7.15945	7.63035
uc007crc.2	Prelp	chr1	135806881	135817978	1.28714	3.14395	4.399	4.80236	4.24793	4.54154	1.92683	3.21408	3.95781	3.14923
uc007cre.1	Btg2	chr1	135971441	135975732	9.57716	9.4633	8.84526	9.05029	8.91886	9.04707	8.44778	8.43739	9.2941	9.31357
uc007crg.2	Chi3l1	chr1	136078980	136086608	4.2465	3.65852	2.07708	3.06539	3.80735	4.05612	2.73419	3.83299	4.29885	4.2647
uc007crs.1	Tmem183a	chr1	136252018	136258576	3.64078	3.50652	3.07708	2.80236	3	2.73419	3.42933	3.99168	3.05092	2.78666
uc007crv.1	Cyb5r1	chr1	136302566	136308315	5.62501	6.14395	3.66204	2.06539	5.32193	5.16045	5.16205	5.37251	4.95781	4.43873
uc007crw.1	Cyb5r1	chr1	136302604	136306576	7.23356	7.19458	3.66204	2.06539	6.47573	6.42069	6.89262	6.99544	6.39077	6.47915
uc007crx.1	Adipor1	chr1	136312043	136328918	3.60907	4.65852	4.07708	3.93986	4.58496	4.82165	3.24876	3.45112	4.22085	3.67974
uc007cry.1	Adipor1	chr1	136312336	136328918	5.15064	5.50652	3.07708	4.80236	6.90689	6.48908	4.47115	4.53601	5.63589	5.63751
uc007crz.1	Klhl12	chr1	136352131	136363147	4.32667	4.3366	3.66204	1.48043	3.16992	3.19362	4.49162	4.63554	4.29885	3.56426
uc007csc.1	Rabif	chr1	136391236	136404461	9.69936	9.72461	8.46939	8.50834	8.57365	8.89406	9.70272	9.64333	9.43247	9.42224
uc007csf.2	Kdm5b	chr1	136456754	136503368	3.92457	3.50652	3.66204	2.06539	0	3.05612	4.22451	4.16161	3.85828	3.37162
uc007csg.2	Kdm5b	chr1	136456754	136528099	3.02411	4.24349	3.07708	3.28779	3.45943	2.54154	3.6638	3.76427	3.37285	2.9793
uc007cso.2	9530009M10Rik	chr1	136676299	136700175	3.57665	4.14395	2.07708	4.18087	3.70044	3.43463	3.5898	3.31361	3.22085	3.56426
uc007csp.1	Ube2t	chr1	136859153	136870714	8.45037	8.0231	6.53651	6.78421	6.33985	6.78947	8.16683	8.12782	7.46878	7.55295
uc007csq.1	Lgr6	chr1	136882929	137001853	3.6718	3.14395	3.07708	3.28779	5.20945	4.90411	2.34187	3.21408	2.63589	3.43873
uc007csr.2	Ptprv	chr1	137005074	137029152	5.98758	6.26733	8.77752	8.82028	12.5223	12.1446	6.12323	6.47818	9.81248	9.62135
uc007csu.1	Arl8a	chr1	137043410	137052845	8.01959	8.24949	9.84526	9.93986	8.93369	8.80833	7.31915	7.14481	8.11701	7.9364
uc007csv.2	Gpr37l1	chr1	137056826	137064258	0.117216	0.336596	6.72093	6.63018	1.58496	0.734188	-0.658129	2.10716	2.05092	2.14923
uc007csy.2	Rnpep	chr1	137159275	137180661	2.36514	0.336596	2.07708	2.06539	2.80735	1.73419	1.8013	1.72865	2.05092	1.56426
uc007csz.1	Timm17a	chr1	137198111	137210314	10.9006	10.8552	9.399	9.65536	10.275	10.2665	10.6528	10.6496	10.5267	10.4681
uc007cta.1	Lmod1	chr1	137221389	137264642	5.81766	5.65852	2.07708	1.48043	6.44294	6.36354	3.73419	4.05058	4.13839	4.50286
uc007ctc.1	Shisa4	chr1	137268032	137271640	5.04795	4.92156	8.66204	8.86845	5.78136	5.88394	3.86543	4.45112	4.80581	4.65173
uc007ctd.1	Shisa4	chr1	137270464	137271640	2.11722	2.65852	6.247	5.56789	2.32193	2.73419	1.6638	1.21408	2.85828	1.78666
uc007ctn.1	Nav1	chr1	137503023	137584682	3.07141	3.50652	6.07708	6.23532	3.90689	3.64108	3.34187	3.53601	3.51036	3.43873
uc007cto.1	Csrp1	chr1	137625773	137648806	10.4623	10.5738	9.93506	10.0215	11.5152	11.6022	9.54032	9.74379	10.1371	9.96443
uc007ctq.2	Phlda3	chr1	137662661	137665711	9.56688	9.88542	10.8253	10.8147	11.0056	10.6869	8.70819	8.91946	10.1157	9.9364
uc007ctt.1	Lad1	chr1	137715174	137729918	7.009	7.29079	2.07708	2.06539	6.61471	7.14358	3.62727	2.86615	3.63589	2.67974
uc007cub.1	Pkp1	chr1	137767971	137815601	-0.882784	0.336596	2.07708	0.480432	7.93074	7.60455	0.926834	-0.593278	4.69478	4.50286
uc007cuo.1	5730559C18Rik	chr1	138110107	138130841	7.12564	7.14395	6.16454	6.15286	7.50779	7.22604	5.7765	5.8076	6.24075	6.21771
uc007cup.1	5730559C18Rik	chr1	138120139	138124239	3.50953	3.3366	2.07708	2.06539	3.70044	2.90411	2.24876	2.40672	3.37285	2.78666
uc007cus.1	9230116N13Rik	chr1	138308492	138312096	4.34603	4.03704	3.07708	3.65036	4.75489	4.59217	4.5317	4.10716	4.51036	4.43873
uc007cuu.2	Ddx59	chr1	138311847	138336797	6.55184	6.56541	5.77752	6.06539	5.49185	5.98212	6.61333	6.70134	6.26038	6.43051
uc007cuv.1	Kif14	chr1	138364424	138428088	7.80721	7.49647	6.325	5.9067	5.35755	6.27335	7.81963	7.77523	7.16987	7.56802
uc007cuy.1	AK051055	chr1	138592787	138622305	4.68707	4.50652	2.07708	0.480432	4.80735	4.59217	5.33056	5.36092	5.29885	4.91004
uc007cvn.1	Nek7	chr1	140381290	140516273	3.07141	1.92156	3.07708	2.48043	2.32193	1.73419	1.34187	1.57665	1.63589	2.88619
uc007cvv.1	2310009B15Rik	chr1	140748555	140753096	2.76107	3.92156	3.66204	4.18087	3.45943	2.54154	3.38627	3.2647	2.85828	3.78666
uc007cvw.1	2310009B15Rik	chr1	140748555	140753431	4.59295	5.29079	4.66204	5.9067	6.08746	5.66493	3.98573	4.47281	5.47719	4.83728
uc007cwh.1	Aspm	chr1	141351349	141390665	4.36514	4.14395	6.46939	6.45771	3.32193	3.54154	4.27261	4.57665	4.13839	4.18875
uc007cwj.1	Asp	chr1	141351395	141355021	3.47477	3.14395	3.66204	3.93986	3	3.98212	3.42933	3.76427	3.05092	3.14923
uc007cwx.1	Cdc73	chr1	145454628	145549814	7.5787	7.54605	5.07708	5.28779	5.64386	5.61683	7.21532	6.86615	6.13839	6.17897
uc007cxd.1	Trove2	chr1	145597920	145624181	6.36514	6.44512	7.72093	7.30061	4.70044	5.22604	5.83372	5.44015	5.05092	5.06676
uc007cxg.2	Rgs2	chr1	145846467	145851279	3.20468	1.3366	6.07708	6.06539	2.32193	3.05612	0.663799	1.40672	1.63589	1.78666
uc007cxm.1	AK158929	chr1	148266565	148342171	3.07141	2.3366	3.66204	3.28779	2.32193	2.90411	1.8013	2.99168	3.51036	3.43873
uc007cxv.1	Ptgs2	chr1	151947253	151955142	8.15887	7.98045	3.07708	2.06539	5.97728	6.69997	4.78481	4.21408	4.69478	4.70722
uc007cyb.2	Tpr	chr1	152239967	152297065	6.083	6.19458	6.247	6.43463	5.16993	5.25775	5.67279	5.95362	6.15945	6.33685
uc007cyj.1	Hmcn1	chr1	152409631	152840565	1.92457	1.3366	7.07708	6.85547	1.58496	1.73419	1.6638	1.57665	0.0509239	2.9793
uc007cym.1	Ivns1abp	chr1	153191627	153203928	3.78964	4.24349	4.66204	3.80236	3	3.19362	4.89646	4.67351	3.95781	4.10858
uc007cyu.1	1190005F20Rik	chr1	153275777	153298054	2.36514	2.92156	2.07708	2.48043	2.80735	2.31915	3.76814	2.72865	3.51036	3.50286
uc007cze.2	1700025G04Rik	chr1	153731653	153937450	4.52661	4.14395	8.12147	8.11706	4.32193	4.54154	4.8176	4.57665	3.37285	4.06676
uc007czf.2	Tsen15	chr1	154217865	154233812	8.77364	8.53627	7.805	8.26833	7.90689	8.11789	8.49162	8.60762	8.38631	8.35651
uc007czh.1	Rgl1	chr1	154364659	154472241	4.99986	5.09148	8.34386	8.77964	3.80735	4.82165	5.42933	4.97658	4.29885	5.16913
uc007czj.2	Arpc5	chr1	154613671	154622710	5.85193	6.14395	5.77752	5.60971	5.55459	5.59217	5.52178	5.94588	5.29885	5.30123
uc007czm.1	Ncf2	chr1	154654386	154684120	4.64078	4.79603	2.07708	0.480432	3.80735	4.05612	6.09676	6.16161	5.85828	5.81219
uc007czo.2	Smg7	chr1	154684124	154749776	3.43914	3.3366	3.07708	2.80236	2.32193	2.05612	3.09676	3.05058	2.63589	3.14923
uc007czr.1	Lamc2	chr1	154969885	155033577	8.64957	8.61272	3.07708	2.48043	6.59991	6.84271	9.26446	9.27091	8.62835	8.73252
uc007czt.1	Lamc2	chr1	155004438	155033577	3.28714	3.3366	2.07708	0.480432	2	2.73419	4.71691	3.99168	3.75136	3.62316
uc007czu.1	Lamc1	chr1	155066051	155179916	12.3663	12.4415	10.3578	10.4958	10.9965	10.9228	12.166	12.229	11.4254	11.4891
uc007czx.1	1700012A16Rik	chr1	155272338	155299704	2.92457	2.3366	2.07708	2.80236	2.32193	0.734188	2.34187	2.40672	2.37285	1.30123
uc007czy.1	Dhx9	chr1	155302887	155334790	7.20997	7.05084	5.88443	5.28779	4.9542	5.01959	6.98212	7.00291	6.09532	6.37162
uc007dab.1	Dhx9	chr1	155323968	155334790	6.64078	6.81233	6.16454	5.65036	6.42626	6.64108	7.30766	7.07206	6.76517	6.77372
uc007dac.1	Npl	chr1	155350145	155396844	7.92296	8.00902	7.12147	7.12429	4.52356	4.48908	7.5969	7.57665	7.29885	6.91594
uc007dad.1	Rgs8	chr1	155500166	155544795	1.28714	2.3366	5.66204	5.06539	2.80735	2.05612	-1.65813	0.406722	2.37285	1.30123
uc007dae.2	Rgs16	chr1	155587482	155592598	7.06558	7.05084	8.36248	8.56789	7.33985	7.37081	3.47115	3.45112	3.95781	3.62316
uc007dao.1	Gm5531	chr1	155721474	155724001	3.50953	2.92156	3.07708	2.48043	3.80735	2.31915	3.34187	3.36092	3.85828	2.88619
uc007daq.1	Glul	chr1	155747074	155756844	12.3327	12.4389	11.1405	11.4361	11.5023	11.5007	11.5969	11.6394	11.0987	11.0206
uc007das.1	AK154552	chr1	155895238	155965081	4.43914	3.3366	4.399	2.48043	4.85798	4.25775	4.55132	4.49418	4.57449	3.9335
uc007dax.2	Ier5	chr1	156943496	156946766	7.20733	7.42406	8.30589	8.55189	8.54689	8.3229	5.14923	5.03608	6.39077	6.28308
uc007dbb.1	Stx6	chr1	157005832	157050647	7.87877	7.97322	9.16454	9.41117	8.21432	8.30784	7.62264	7.67351	7.51853	7.38018
uc007dbe.1	BC034090	chr1	157059600	157079870	4.6718	5.14395	7.03127	7.23532	6.89482	6.57968	3.98573	3.79904	5.00512	4.88619
uc007dbf.1	Xpr1	chr1	157122786	157264574	5.76827	5.72891	6.98397	6.68989	5.08746	5.22604	6.3531	5.95362	5.37285	5.59401
uc007dbk.2	Acbd6	chr1	157405249	157419417	2.43914	2.3366	2.07708	0.480432	2.32193	1.31915	1.14923	1.40672	0.0509239	0.979301
uc007dbl.2	Acbd6	chr1	157405249	157434924	2.70218	3.3366	3.07708	2.06539	3.80735	3.64108	2.8013	3.05058	2.37285	2.56426
uc007dbp.1	Qsox1	chr1	157625284	157660029	3.36514	3.3366	2.07708	4.87275	5.2854	5.05612	3.04231	3.31361	3.85828	3.56426
uc007dbq.1	Qsox1	chr1	157648576	157660029	3.11722	2.92156	3.07708	3.28779	3.16992	2.90411	2.8013	3.57665	2.85828	3.14923
uc007dbs.2	Cep350	chr1	157692093	157820385	5.65637	4.72891	6.66204	6.33841	4.45943	4.98212	5.38627	5.12097	4.75136	4.88619
uc007dcj.1	Soat1	chr1	158358238	158404459	9.17385	9.08143	7.399	6.93986	8.37504	8.48573	6.85362	6.75102	6.60551	6.77372
uc007dcn.2	Tor3a	chr1	158583747	158604470	7.20468	6.96595	5.98397	5.68989	4.45943	4.82165	6.06297	5.73764	4.90891	5.37162
uc007dcr.1	Fam20b	chr1	158631772	158649041	3.02411	4.03704	4.07708	3.48043	2	2.31915	3.42933	3.10716	3.37285	3.43873
uc007ddg.2	Rasal2	chr1	159065313	159342726	6.77185	6.67645	8.76358	8.50834	5.61471	6.05612	6.6683	6.73764	6.33633	6.60135
uc007ddi.1	2810025M15Rik	chr1	159342482	159350367	9.626	9.32812	10.8253	10.9098	8.51964	8.4587	9.15645	9.3507	9.34554	9.12905
uc007ddj.1	BC026585	chr1	159388712	159418864	2.9752	4.03704	3.66204	0.480432	2.80735	3.05612	3.24876	3.93028	4.05092	3.14923
uc007ddz.1	Rfwd2	chr1	161162456	161277711	9.39218	9.03704	8.90997	8.89406	8.16992	7.86861	9.00365	8.8641	8.10621	8.22248
uc007dec.2	4930523C07Rik	chr1	161974510	162008717	1.43914	2.3366	4.399	3.48043	4.52356	3.98212	0.926834	-0.593278	2.63589	2.14923
uc007dee.2	Tnn	chr1	162015162	162083706	1.70218	0.336596	2.07708	0.480432	9.24793	9.06511	0.341871	0.991685	5.98166	6.47115
uc007def.1	Mrps14	chr1	162125390	162131317	9.38224	9.17895	7.98397	8.18087	8.64746	8.73981	9.03884	8.85174	8.71626	8.95658
uc007deg.1	Cacybp	chr1	162133051	162142908	9.59952	9.31959	7.53651	7.88131	8.41363	8.4587	9.21378	8.98037	8.56662	8.6832
uc007deh.1	Rabgap1l	chr1	162149304	162281702	2.70218	1.92156	5.66204	5.28779	2.32193	3.05612	2.14923	1.21408	2.05092	1.30123
uc007dej.2	Rabgap1l	chr1	162186702	162723069	1.57665	2.3366	4.07708	2.80236	2.58496	1.73419	1.5118	2.31361	1.63589	0.564264
uc007del.2	Rc3h1	chr1	162836541	162905107	8.52129	8.3645	8.28653	7.72836	7.24793	7.35624	8.39172	8.12097	7.67298	7.79948
uc007deu.1	Gas5	chr1	162965296	162968668	8.91488	8.77954	7.95972	8.05029	8.56605	8.51555	8.78689	8.83822	8.73392	8.53963
uc007dey.1	Dars2	chr1	162970743	163000763	7.54558	7.21924	5.98397	6.18087	6.24793	6.56708	7.60631	7.43463	6.96979	6.91594
uc007dfe.2	Cenpl	chr1	163001022	163016474	3.92457	4.3366	4.66204	3.28779	3.16992	2.73419	4.04231	3.61618	3.51036	3.9793
uc007dff.1	Klhl20	chr1	163018508	163061610	4.98758	5.24349	3.66204	3.48043	3.45943	4.19362	4.95658	5.10716	4.29885	4.40557
uc007dfh.1	Klhl20	chr1	163026575	163061610	5.41184	5.69415	5.07708	5.33841	4.9542	5.59217	5.47115	5.49418	5.77884	5.24609
uc007dfj.2	Ankrd45	chr1	163072842	163100638	7.73376	7.51651	3.07708	1.48043	3.32193	3.05612	7.90029	7.70364	7.29885	7.00167
uc007dfl.1	Prdx6	chr1	163170242	163181297	7.6486	6.26733	5.399	5.48043	6.61471	6.57968	6.96026	6.942	6.26038	6.25543
uc007dft.2	AI848100	chr1	163746242	163806792	7.27203	6.89118	7.399	7.37525	6.06609	6.37804	6.82971	6.56154	6.20067	6.495
uc007dgf.1	Dnm3os	chr1	164147753	164155681	2.70218	1.92156	2.07708	0.480432	3.70044	3.19362	1.5118	1.21408	2.63589	1.78666
uc007dgi.1	Mettl13	chr1	164471579	164478476	3.8721	4.3366	3.07708	3.80236	4.58496	3.82165	4.5317	4.76427	3.85828	3.78666
uc007dgj.1	Mettl13	chr1	164473766	164478476	4.91163	4.72891	4.07708	3.28779	4.75489	4.19362	4.47115	4.61618	3.95781	4.40557
uc007dgk.1	Vamp4	chr1	164500853	164525401	3.32667	4.24349	5.66204	4.06539	4.16993	3.98212	4.22451	3.57665	3.63589	3.83728
uc007dgl.1	Vamp4	chr1	164500958	164529209	2.81766	2.65852	3.66204	5.18087	3.70044	4.48908	4.17476	3.96131	3.95781	4.76066
uc007dgr.1	Prrc2c	chr1	164601915	164670687	5.03608	4.86016	3.66204	3.48043	3	4.05612	4.19985	4.31361	4.37285	4.22723
uc007dgu.1	Bat2l2	chr1	164650022	164670687	2.64078	3.3366	2.07708	0.480432	2.58496	2.31915	2.8013	1.99168	3.37285	1.9793
uc007dho.1	Kifap3	chr1	165709809	165847231	6.56016	6.16949	5.98397	5.60971	5.04439	4.82165	6.29607	6.14143	5.33633	5.60866
uc007dhs.1	BC055324	chr1	165876123	165920890	2.57665	2.92156	2.07708	2.80236	2.32193	2.73419	2.73419	2.21408	2.37285	2.67974
uc007dht.1	Scyl3	chr1	165881343	165885257	3.8721	4.42406	4.07708	3.48043	4.16993	3.43463	4.29607	4.10716	4.13839	4.14923
uc007dhu.1	BC055324	chr1	165884138	165924912	5.21525	4.14395	2.07708	2.06539	3.16992	3.19362	5.02837	4.49418	3.75136	3.14923
uc007dic.1	F5	chr1	166081989	166150405	3.40262	1.92156	2.07708	0.480432	3.58496	4.37804	0.926834	1.72865	2.37285	3.67974
uc007dif.2	4930455F23Rik	chr1	166205728	166217978	5.81766	5.42406	6.399	5.68989	4.90689	4.90411	5.76814	6.05058	4.63589	5.08783
uc007dip.1	Atp1b1	chr1	166367397	166388486	9.30951	9.54361	5.77752	6.23532	6.22882	6.14358	9.47822	9.30078	8.53876	8.90411
uc007diz.2	Tiprl	chr1	167142416	167167089	9.00367	8.7203	8.03127	7.76583	7.70736	7.61071	8.55376	8.45793	7.99344	7.98212
uc007djb.2	Dcaf6	chr1	167259631	167390594	6.72084	6.52642	7.28653	7.36307	6.88264	6.73419	7.34187	7.33746	7.05092	7.22723
uc007djc.1	AK008044	chr1	167390767	167394782	3.73193	3.50652	3.07708	3.80236	3.80735	3.54154	3.19985	3.31361	3.22085	3.62316
uc007djd.1	Brp44	chr1	167391338	167411345	6.7967	6.16949	6.72093	6.28779	6.45943	6.72287	6.85757	6.55647	6.69478	6.53389
uc007dkj.1	Gpa33	chr1	168060590	168096641	8.83146	8.99123	2.07708	0.480432	7.53916	7.62901	8.92871	8.90955	9.59975	9.60501
uc007dkk.1	Mael	chr1	168131515	168168875	6.5181	5.98045	2.07708	0.480432	4.32193	4.37804	7.26073	7.10716	7.2108	7.37162
uc007dkm.2	Tada1	chr1	168309297	168323751	7.1725	7.09148	8.03127	8.01181	7.43463	7.28878	5.92683	5.97658	6.07329	6.41393
uc007dku.1	Uck2	chr1	169156216	169215258	11.3523	11.4729	9.48647	9.74253	11.73	11.7458	11.5221	11.6277	11.5277	11.4651
uc007dkv.1	Tmco1	chr1	169238800	169264109	9.26378	9.13426	8.69179	8.36917	8.25739	8.34521	9.41869	9.20276	8.89327	8.78666
uc007dkx.1	Aldh9a1	chr1	169280121	169298661	10.1917	10.0266	7.325	7.00399	8.96	8.8763	9.74754	9.76647	9.24568	9.09304
uc007dky.1	Mgst3	chr1	169302514	169323928	7.52873	7.77122	7.325	7.32592	8.62936	8.57654	6.57549	6.63072	8.05655	7.83417
uc007dla.2	Rxrg	chr1	169528492	169569754	2.11722	3.3366	3.07708	1.48043	2.58496	2.54154	1.6638	-0.00831527	1.05092	0.979301
uc007dld.1	Pbx1	chr1	170049494	170362389	0.439144	2.92156	4.66204	4.93986	3.80735	3.19362	1.14923	0.406722	2.63589	1.56426
uc007dli.1	Pbx3	chr1	170354572	170362389	1.11722	2.65852	3.66204	2.48043	2	2.05612	-1.65813	-0.593278	0.0509239	1.30123
uc007dlp.1	Hsd17b7	chr1	171879667	171899336	6.80021	7.10478	7.28653	7.2219	6.89482	6.83222	7.41065	7.10021	6.70914	6.91594
uc007dma.1	Uhmk1	chr1	172129386	172145524	7.27961	7.27911	6.60064	6.58896	5.93074	6.19362	7.13303	6.94975	6.09532	6.25543
uc007dmi.2	Olfml2b	chr1	172574662	172612920	4.40262	4.14395	7.28653	6.92338	5.61471	5.28878	3.55132	3.93028	4.63589	3.9793
uc007dmj.1	Atf6	chr1	172634587	172797902	9.18398	8.96959	8.00781	7.61998	7.85798	8.20586	8.95934	8.89356	8.61698	8.57921
uc007dml.1	Dusp12	chr1	172804318	172815671	4.40262	2.3366	2.07708	2.06539	0	1.73419	3.83372	3.16161	3.05092	3.06676
uc007dna.1	1700009P17Rik	chr1	173051791	173057098	3.2465	3.14395	3.07708	2.06539	4.9542	4.77858	1.34187	3.2647	3.37285	2.88619
uc007dnb.2	Sdhc	chr1	173059287	173080734	10.4352	10.4227	10.5967	10.7248	10.8811	10.8157	10.0963	10.3711	10.5236	10.4035
uc007dnk.2	Apoa2	chr1	173155184	173156510	6.20468	6.42406	2.07708	0.480432	6.64386	6.62901	6.19985	6.45657	6.95781	6.44691
uc007dnl.1	Fcer1g	chr1	173159702	173164480	1.43914	2.65852	2.07708	1.48043	1.58496	1.73419	2.04231	1.86615	3.05092	2.14923
uc007dnn.1	Adamts4	chr1	173180552	173190053	1.92457	3.3366	7.325	7.03502	4	3.31915	1.8013	1.21408	1.05092	2.56426
uc007dnq.2	B4galt3	chr1	173200458	173207026	2.20468	2.92156	3.66204	3.48043	0	2.05612	1.34187	1.86615	2.05092	1.56426
uc007dns.1	Ppox	chr1	173207122	173211317	6.84173	6.86016	7.56893	7.78421	6.91886	6.86347	6.82569	7.30457	6.83228	6.83728
uc007dnv.2	Usp21	chr1	173214593	173218092	4.04795	4.03704	3.66204	2.48043	3.70044	2.90411	3.55132	3.89858	3.37285	3.83728
uc007dnw.1	Ufc1	chr1	173218694	173225113	10.3472	10.193	9.81179	10.097	10.3387	10.2675	10.0951	10.2404	10.2953	10.2967
uc007doc.1	Pfdn2	chr1	173275829	173288301	7.78077	7.95865	6.66204	6.52483	7.44294	7.27335	7.39444	7.23009	7.2108	7.03458
uc007dod.1	Klhdc9	chr1	173288579	173290929	2.92457	3.65852	2.07708	0.480432	2.80735	2.90411	3.14923	3.31361	4.05092	3.37162
uc007dol.1	Usf1	chr1	173341811	173348873	0.924571	1.92156	2.07708	2.48043	2	1.31915	1.14923	0.406722	2.37285	1.30123
uc007doo.1	F11r	chr1	173367691	173394724	9.4318	9.36174	3.66204	2.48043	8.11894	8.16882	8.11336	8.17986	8.43463	8.28764
uc007dop.1	Refbp2	chr1	173433608	173434881	4.34603	4.24349	6.16454	6.43463	5.9542	5.59217	4.64565	4.78176	5.63589	5.24609
uc007dpk.2	Ncstn	chr1	173996143	174012880	9.73973	9.81638	9.89725	10.1669	10.6357	10.474	9.33339	9.50146	9.74789	9.61502
uc007dpl.2	Copa	chr1	174012659	174023691	3.99986	4.42406	4.88443	4.28779	3.80735	4.05612	4.75126	4.07915	4.44324	3.9335
uc007dpn.2	Copa	chr1	174012659	174052463	10.1544	10.131	9.47796	9.31648	9.30606	9.26362	9.64165	9.72131	9.42161	9.36084
uc007dpo.1	Copa	chr1	174042254	174045699	2.9752	3.50652	4.399	2.48043	1	3.82165	3.55132	2.93028	3.37285	3.43873
uc007dpq.2	Pex19	chr1	174056885	174066628	7.1967	6.54605	6.16454	6.5028	6.45943	6.89406	6.47115	6.82879	6.07329	6.57921
uc007dpr.2	Dcaf8	chr1	174078145	174103561	2.70218	2.92156	4.07708	2.48043	2.58496	3.82165	3.86543	2.86615	2.05092	2.67974
uc007dps.2	Dcaf8	chr1	174078145	174118712	5.04795	4.03704	3.66204	4.87275	4.58496	4.59217	5.4504	5.72865	4.63589	4.10858
uc007dpt.2	Dcaf8	chr1	174078145	174119939	2.36514	2.92156	2.07708	2.48043	2.80735	1.31915	2.8013	3.2647	2.85828	2.30123
uc007dpx.2	Dcaf8	chr1	174078308	174126524	4.36514	4.42406	5.247	5.18087	4.08746	4.73419	4.47115	4.57665	4.37285	4.33685
uc007dpy.1	Pea15a	chr1	174126859	174136912	9.5674	9.66303	12.5689	12.6783	9.11634	9.15415	8.01959	7.88448	8.21583	8.03729
uc007dqa.2	Casq1	chr1	174140024	174150026	4.13958	4.98045	3.66204	3.48043	2.80735	3.05612	3.42933	3.05058	3.95781	3.67974
uc007dqe.1	Igsf8	chr1	174242537	174249966	2.20468	4.14395	4.399	4.38732	4.39232	3.82165	2.14923	2.40672	2.63589	2.30123
uc007dqj.1	Kcnj10	chr1	174271340	174304216	3.76107	3.65852	7.43463	7.03502	2	1.73419	2.42933	2.99168	1.05092	1.30123
uc007dqk.2	Pigm	chr1	174306661	174314230	9.70827	9.55092	8.90997	8.46912	8.7211	9.08292	9.50992	9.35363	9.08159	9.26701
uc007dql.2	Slamf9	chr1	174405490	174408540	3.36514	2.92156	2.07708	0.480432	2.32193	2.31915	4.76814	5.10716	4.44324	4.40557
uc007dqp.1	Tagln2	chr1	174430376	174437506	10.4963	10.5521	10.9036	11.0616	11.0701	11.0351	9.96575	10.0306	10.3305	10.1997
uc007dqw.1	Dusp23	chr1	174560899	174563105	2.64078	2.92156	5.53651	4.56789	2.58496	2.31915	0.341871	-0.593278	2.63589	0.979301
uc007dsw.2	Spna1	chr1	176102906	176178580	5.78964	5.24349	2.07708	0.480432	3.58496	3.54154	5.37529	5.12097	5.05092	4.91004
uc007dtd.2	Fmn2	chr1	176431955	176752860	5.64078	5.86016	5.66204	6.15286	5.97728	5.77858	5.05612	4.99168	5.29885	5.40557
uc007dtf.1	Grem2	chr1	176763915	176851950	7.10874	7.24349	2.07708	0.480432	6.16993	6.30404	3.29607	3.31361	4.13839	4.33685
uc007dtn.2	Fh1	chr1	177531508	177555766	9.56636	9.50902	9.38086	9.36917	8.75489	8.73419	9.43529	9.52631	8.98166	9.03865
uc007dtq.1	Opn3	chr1	177592558	177622721	2.57665	3.14395	5.07708	5.18087	3.80735	3.19362	1.6638	1.86615	2.63589	3.30123
uc007dtr.2	Chml	chr1	177612368	177618484	4.60907	4.50652	5.53651	5.18087	4	3.82165	4.4504	4.18808	4.29885	4.33685
uc007dtu.2	Exo1	chr1	177810908	177841527	10.7275	10.4774	8.46939	8.23532	8.67596	8.94608	10.7328	10.6985	9.56859	9.80187
uc007due.1	Cep170	chr1	178663783	178737255	3.99986	4.24349	6.399	6.28779	3.70044	3.73419	3.89646	3.79904	3.63589	3.37162
uc007duk.2	Akt3	chr1	178952245	179178898	6.28212	5.72891	7.77752	7.63018	4.90689	4.86347	6.40796	6.35509	4.75136	4.81219
uc007dut.1	Adss	chr1	179693308	179726640	8.30209	8.1758	5.77752	5.76583	5.75489	6.14358	8.06468	7.83717	7.05092	7.33245
uc007duu.1	Adss	chr1	179704748	179726640	3.20468	4.24349	3.66204	2.06539	1	2.90411	3.5898	3.96131	3.75136	3.14923
uc007duy.1	AK046316	chr1	180243458	180248680	3.40262	3.3366	4.399	4.18087	3.90689	3.90411	4.24876	3.79904	3.37285	3.30123
uc007duz.1	Fam36a	chr1	180249283	180252824	5.59295	5.24349	6.16454	5.76583	3.58496	3.98212	4.75126	4.61618	4.63589	4.2647
uc007dvb.2	Hnrnpu	chr1	180252296	180267915	2.36514	1.3366	3.66204	3.65036	3.70044	3.64108	2.04231	2.31361	2.05092	1.9793
uc007dvc.2	AK049600	chr1	180255467	180259121	5.05973	4.42406	4.66204	5.28779	3.45943	4.43463	6.18108	5.36092	4.22085	4.62316
uc007dve.1	Efcab2	chr1	180336011	180413380	4.04795	4.42406	3.07708	2.48043	3.58496	2.05612	4.40796	3.96131	3.51036	3.9793
uc007dvh.2	Kif26b	chr1	180459255	180862988	3.57665	3.65852	2.07708	2.06539	4.70044	4.54154	3.98573	3.65465	4.29885	4.30123
uc007dvj.1	Smyd3	chr1	180885169	181448134	7.27961	7.48634	5.247	5.43463	6.04439	6.64108	7.34187	7.50212	7.44324	7.57921
uc007dvl.1	Tfb2m	chr1	181458186	181476398	5.30704	5.42406	4.88443	4.56789	4.24793	4.12651	4.98573	5.13464	4.75136	4.91004
uc007dvo.1	Cnst	chr1	181476659	181557604	7.87043	7.95131	7.07708	7.01959	6.70044	6.62901	8.02487	7.82035	7.32705	7.40557
uc007dvp.1	Sccpdh	chr1	181598361	181617315	7.76107	7.59398	7.95972	7.88131	5.80735	6.10923	8.06809	7.96514	6.95781	7.20812
uc007dvq.1	Ahctf1	chr1	181676221	181684203	3.84514	2.92156	3.07708	2.48043	4	3.82165	3.24876	2.49418	3.37285	3.06676
uc007dwf.1	Gapdh	chr1	182257099	182260680	2.28714	2.3366	4.399	4.18087	2.58496	2.90411	1.34187	1.72865	0.0509239	1.9793
uc007dwg.1	Itpkb	chr1	182260606	182353790	6.083	6.40269	10.1804	10.1722	7.32193	7.13507	3.55132	4.05058	3.85828	3.67974
uc007dwi.1	Parp1	chr1	182499105	182531385	13.0229	13.0156	10.677	10.7566	11.7814	11.7683	13.1376	13.2335	12.73	12.7342
uc007dwp.1	Mixl1	chr1	182623178	182627165	3.70218	3.92156	2.07708	0.480432	3.80735	2.73419	3.5118	3.61618	2.63589	2.78666
uc007dwq.2	Acbd3	chr1	182656173	182684335	7.65055	7.47615	7.325	6.87275	6.16993	6.36354	6.74701	6.67351	6.22085	6.64464
uc007dwr.1	H3f3a	chr1	182732698	182743734	11.0487	11.2093	9.99594	9.3813	10.0126	9.63203	11.3927	10.6439	10.4096	10.378
uc007dwt.1	BC031781	chr1	182781281	182798245	10.19	10.2922	7.90997	7.79331	9.25974	9.22604	10.0319	9.86769	9.90267	9.9056
uc007dwu.1	Lefty2	chr1	182823249	182829233	9.82242	9.83843	2.07708	0.480432	9.59433	9.59837	8.71365	8.72187	9.02247	9.21412
uc007dwv.2	Pycr2	chr1	182834404	182838219	10.7278	10.7981	10.0254	10.3353	12.371	12.2543	9.91315	10.2257	10.815	10.768
uc007dww.1	Lefty1	chr1	182865169	182868532	9.1144	9.08814	2.07708	0.480432	12.8999	12.8557	7.01076	7.43739	8.51036	8.57363
uc007dxb.1	Nvl	chr1	183023553	183074288	9.38107	9.19458	7.247	7.09514	7.54689	7.73419	9.13629	8.89657	8.18021	8.38444
uc007dxc.1	Nvl	chr1	183026112	183035302	5.29712	5.14395	4.399	3.28779	4.39232	5.40661	5.23669	4.74657	4.69478	4.65173
uc007dxf.2	Wdr26	chr1	183103356	183142109	8.99909	8.75445	8.41693	8.46343	8.32643	8.48573	8.79514	8.60762	8.03961	8.39715
uc007dxo.2	Lbr	chr1	183745445	183772532	10.8079	10.514	8.34386	8.77964	9.55459	9.75794	10.8912	10.8941	10.008	10.1623
uc007dxw.1	Degs1	chr1	184205900	184212890	9.46705	9.18209	7.56893	7.44622	8.42206	8.22203	9.07404	9.06761	8.80247	8.75902
uc007dxx.1	Degs1	chr1	184208627	184212890	3.28714	4.03704	2.07708	0.480432	2.80735	3.19362	3.5898	3.57665	2.85828	2.78666
uc007dyb.1	Fbxo28	chr1	184243232	184271737	6.931	6.79603	6.07708	6.41117	5.85798	6.25775	6.53663	6.72413	6.37285	6.31915
uc007dyc.1	Trp53bp2	chr1	184339297	184392567	6.58074	6.56541	5.247	6.06539	5.61471	5.73419	6.12323	6.33153	5.51036	5.82479
uc007dye.2	Capn2	chr1	184397389	184447614	9.13402	9.02659	8.64693	8.74253	9.84078	9.71718	6.92307	6.942	7.74441	8.06676
uc007dyf.1	calp80	chr1	184414030	184422692	2.20468	1.92156	4.88443	3.93986	5.35755	4.77858	1.14923	0.72865	2.05092	2.43873
uc007dyk.1	Susd4	chr1	184695036	184825785	5.67946	6.00902	5.53651	6.41117	5.58496	6.14358	4.5898	4.57665	4.95781	5.02369
uc007dyl.1	Tlr5	chr1	184884918	184906175	2.64078	3.3366	2.07708	1.48043	0	1.73419	5.14923	4.88246	4.22085	4.14923
uc007dym.1	Dusp10	chr1	185858339	185899515	5.53507	5.86016	8.20636	8.00399	5.93074	5.94364	3.29607	2.93028	4.57449	4.56426
uc007dyn.2	Hlx	chr1	186551023	186556372	1.11722	2.3366	7.28653	7.26179	2.32193	3.43463	0.663799	-0.593278	2.37285	1.30123
uc007dyq.1	Mosc2	chr1	186636946	186669726	7.80721	7.50652	8.247	8.34462	8.52356	8.39597	7.35868	7.62589	7.90267	7.74417
uc007dyr.1	Mosc2	chr1	186652818	186669726	3.40262	3.14395	4.07708	3.06539	2.32193	3.43463	2.86543	3.53601	2.85828	3.37162
uc007dys.1	C130074G19Rik	chr1	186695804	186706915	5.41184	4.98045	3.07708	0.480432	4.45943	4.48908	5.76814	5.70134	4.85828	4.9793
uc007dyu.2	Rab3gap2	chr1	187028046	187110625	7.3291	7.06452	6.77752	7.06539	6.22882	6.64108	7.16842	7.36382	6.65084	6.59401
uc007dyz.1	Iars2	chr1	187110540	187153280	7.34603	7.03704	6.399	5.68989	6.26679	6.37804	6.93806	6.8865	6.18021	6.4871
uc007dzb.1	Iars2	chr1	187145061	187153280	3.20468	3.79603	4.88443	3.93986	4.08746	3.90411	3.89646	4.23961	4.37285	4.10858
uc007dzc.1	Bpnt1	chr1	187156037	187181648	3.92457	2.65852	3.07708	1.48043	0	2.31915	2.86543	3.40672	2.37285	2.56426
uc007dzf.1	Eprs	chr1	187186973	187233630	5.53507	5.38099	4.07708	3.93986	5.04439	5.3489	6.03536	5.44015	5.44324	5.87412
uc007dzg.1	Eprs	chr1	187186973	187252234	7.84853	7.61272	7.50334	7.3508	6.62936	7.4689	7.34187	7.56154	7.27009	7.56802
uc007dzm.2	Lyplal1	chr1	187911610	187941189	7.50523	7.26733	5.53651	5.80236	7.49985	7.37081	7.73633	7.56911	7.16987	7.22248
uc007dzq.1	Rrp15	chr1	188544964	188573237	9.06046	8.87576	6.60064	6.83798	7.60733	7.50898	8.74701	8.66647	7.78563	8.02643
uc007dzr.1	AK020767	chr1	188573274	188576800	3.20468	3.79603	4.07708	3.65036	3.70044	2.54154	3.42933	3.65465	3.51036	3.14923
uc007dzs.1	D1Pas1	chr1	188791294	188794506	5.31689	4.92156	2.07708	0.480432	2.58496	2.54154	6.11006	6.06493	6.0282	6.15921
uc007eao.2	Cenpf	chr1	191464492	191511965	6.05973	5.95131	6.46939	6.33841	4.90689	5.56708	5.9492	6.14819	6.20067	5.56426
uc007eaw.1	Ptpn14	chr1	191668921	191676342	4.20468	4.50652	5.247	5.06539	5.39232	5.54154	4.0143	3.83299	5.13839	4.22723
uc007eax.1	Smyd2	chr1	191704370	191746167	7.68137	7.82845	8.09944	8.26833	9.2384	9.05612	7.93433	8.14819	8.75828	8.65526
uc007ebb.1	Prox1	chr1	191945657	191994559	0.439144	2.3366	5.88443	5.18087	3.16992	2.54154	0.663799	-1.59328	2.05092	-0.020699
uc007ebg.1	Rps6kc1	chr1	192619947	192668481	5.9752	5.72891	3.66204	3.28779	3.80735	3.82165	5.87325	5.84135	4.80581	4.83728
uc007ebi.2	Rps6kc1	chr1	192596757	192735649	3.32667	3.92156	4.07708	4.18087	3.45943	4.05612	3.24876	3.72865	4.05092	2.56426
uc007ebr.2	Vash2	chr1	192771524	192802877	1.11722	2.65852	2.07708	1.48043	2	2.31915	1.8013	1.72865	2.37285	-0.020699
uc007ebv.1	Mfsd7b	chr1	192829710	192850069	2.50953	2.65852	3.07708	3.28779	1.58496	1.31915	1.34187	1.40672	2.37285	0.979301
uc007ecf.1	AK021325	chr1	193048352	193049565	2.02411	2.65852	4.66204	3.65036	2.80735	3.05612	3.34187	2.31361	2.85828	2.30123
uc007ecg.1	Nenf	chr1	193130675	193141997	6.40262	6.50652	7.66204	7.86414	7.59246	7.70573	5.85757	6.00664	6.63589	6.43873
uc007ech.1	Tmem206	chr1	193149843	193176804	6.72084	6.52642	7.36248	7.85547	6.89482	6.92401	6.78895	6.50475	6.00512	6.31915
uc007eci.1	Ppp2r5a	chr1	193175859	193220920	10.4072	10.2465	9.1856	9.37828	9.7211	9.81767	10.6148	10.4955	9.94423	9.87033
uc007ecm.1	ramp	chr1	193373707	193399413	4.32667	3.79603	4.07708	3.06539	1.58496	3.19362	5.04231	4.47281	3.75136	3.22723
uc007ecn.1	Dtl	chr1	193384266	193399413	4.71713	3.92156	3.07708	3.28779	3.90689	3.43463	5.02837	4.384	3.05092	4.10858
uc007eco.1	Ints7	chr1	193399612	193433514	4.84514	4.98045	4.88443	4.56789	4.64386	5.09174	5.6638	5.88246	4.80581	4.56426
uc007ecw.2	Nek2	chr1	193645351	193652171	4.384	4.58452	4.399	3.06539	3.58496	4.37804	5.49162	5.64513	4.85828	4.81219
uc007edb.2	1700034H15Rik	chr1	193717950	193731406	2.43914	3.14395	3.07708	1.48043	3.45943	2.73419	2.86543	2.49418	2.63589	-1.0207
uc007edc.1	Slc30a1	chr1	193730659	193737126	8.75836	8.63122	7.66204	7.95617	8.23362	8.02421	8.87909	8.67116	8.62457	8.67974
uc007edm.1	Gm10516	chr1	193960779	193974907	1.28714	0.336596	2.07708	2.80236	2	2.31915	1.14923	0.991685	2.85828	0.979301
uc007edp.2	Hhat	chr1	194336709	194597413	2.43914	2.3366	2.07708	2.80236	3.32193	2.31915	2.5898	2.49418	3.85828	2.78666
uc007edy.1	Irf6	chr1	194979305	194998229	6.68707	6.622	2.07708	0.480432	4.24793	4.25775	5.26073	5.16161	4.80581	4.76066
uc007eei.2	G0s2	chr1	195098353	195099382	2.81766	2.65852	6.93506	6.98823	1.58496	0.734188	0.663799	1.21408	2.63589	1.9793
uc007eem.1	AK014513	chr1	195333433	195335997	3.81766	4.14395	2.07708	0.480432	2	2.31915	2.14923	2.10716	2.85828	2.30123
uc007een.1	Plxna2	chr1	196446022	196643062	4.6718	4.72891	8.77752	8.96425	6.26679	6.00098	4.92683	4.31361	5.05092	4.50286
uc007eer.2	A330023F24Rik	chr1	196843592	196864102	2.8721	3.50652	3.66204	4.65036	5.12928	4.68839	2.34187	2.65465	3.51036	4.06676
uc007efb.1	Cnksr3	chr10	3134303	3227479	5.90512	6.11796	5.88443	6.45771	7	6.99158	6.06979	6.12097	6.54278	5.94509
uc007egi.1	Mtrf1l	chr10	4522597	4534654	5.384	4.86016	4.399	5.68989	4.45943	3.73419	5.09676	4.31361	3.85828	4.50286
uc007egj.1	Fbxo5	chr10	4541075	4547383	8.5612	8.37002	6.77752	6.5028	7.57743	7.54797	8.98843	8.76207	7.89641	8.2808
uc007egq.1	Syne1	chr10	5151833	5326342	4.34603	3.79603	5.77752	4.87275	3.90689	4.90411	3.19985	2.31361	3.51036	3.56426
uc007egz.1	1700052N19Rik	chr10	5891400	5913936	3.32667	3.65852	3.07708	3.48043	3	2.73419	2.86543	3.36092	2.05092	2.30123
uc007ehb.1	1700052N19Rik	chr10	5906071	5913936	2.20468	2.65852	3.07708	2.48043	1.58496	2.31915	0.663799	1.21408	0.0509239	0.979301
uc007ehc.2	Rmnd1	chr10	5914188	5920447	4.49226	4.03704	3.07708	2.80236	3.32193	3.98212	4.98573	5.18808	5.37285	5.43873
uc007ehi.2	Akap12	chr10	5987069	6080212	6.46594	6.92156	5.53651	5.28779	5.20945	5.16045	5.92683	6.37251	6.09532	6.28308
uc007eib.2	A630066F11Rik	chr10	7383168	7384421	3.2465	4.3366	5.07708	4.65036	3.58496	4.43463	3.6638	3.61618	4.57449	4.10858
uc007eic.2	Nup43	chr10	7387301	7395878	3.92457	4.14395	3.07708	3.28779	2.80735	3.73419	4.6638	4.7105	3.95781	4.02369
uc007eid.2	Nup43	chr10	7387301	7398684	7.41871	7.27911	5.247	5.06539	5.72792	5.61683	7.57789	7.33746	7.13839	7.18387
uc007eie.2	BC020402	chr10	7398768	7400956	3.73193	2.92156	5.399	5.43463	4.90689	5.25775	4.8013	3.65465	4.75136	4.9793
uc007eig.2	Lats1	chr10	7401006	7436259	0.439144	2.3366	2.07708	3.48043	3.16992	2.90411	1.34187	1.57665	3.05092	1.30123
uc007eii.2	Katna1	chr10	7445797	7482948	7.58074	7.21924	6.53651	6.65036	6.49185	6.48908	7.29897	7.33153	6.85828	7.28308
uc007ein.1	AK084809	chr10	7511187	7512622	4.98758	5.24349	4.66204	4.72836	4.80735	4.05612	5.71691	5.23961	4.90891	5.24609
uc007eio.2	Ppil4	chr10	7512691	7532672	4.91163	4.42406	4.399	4.38732	4.52356	4.59217	5.21224	4.63554	4.90891	4.53389
uc007eip.2	Ppil4	chr10	7512691	7542361	6.53084	5.89118	6.16454	6.20835	4.75489	4.90411	6.20606	6.12097	5.88381	6.02369
uc007eir.2	Tab2	chr10	7625445	7675921	7.62104	7.35896	7.247	7.86414	7	7.3489	7.60866	7.36672	7.16987	7.20812
uc007eit.1	Ust	chr10	7924550	8238623	2.02411	2.3366	6.247	5.60971	3	3.43463	2.86543	3.2647	3.75136	3.30123
uc007eiu.1	Sash1	chr10	8442016	8605868	7.58686	7.71164	8.58487	8.47479	7.65821	7.85831	7.46599	7.24907	7.53474	7.69698
uc007eiz.2	Stxbp5	chr10	9475344	9620838	3.40262	3.92156	5.247	5.52483	4.64386	4.19362	3.19985	3.83299	3.22085	3.56426
uc007ejg.1	Rab32	chr10	10264836	10278005	5.34603	5.09148	3.66204	4.48043	5.39232	5.43463	3.89646	3.36092	4.51036	4.78666
uc007ejn.1	Shprh	chr10	10869227	10874324	2.92457	3.79603	4.07708	3.06539	2.58496	3.05612	3.55132	2.86615	2.05092	2.88619
uc007ejv.1	Epm2a	chr10	11063242	11177275	2.11722	2.65852	3.07708	3.06539	2.80735	2.31915	3.5118	4.18808	2.85828	3.62316
uc007ejw.1	Utrn	chr10	12101985	12581533	6.69086	6.71164	5.77752	5.23532	5.2854	5.71147	6.89646	6.42909	6.05092	6.22723
uc007eke.1	Utrn	chr10	12440616	12589163	1.81766	1.3366	4.07708	2.80236	3.80735	2.90411	1.8013	1.86615	2.37285	1.78666
uc007ekf.1	AK045519	chr10	12636445	12642898	3.32667	2.65852	4.399	3.28779	3.16992	2.90411	3.24876	3.49418	3.37285	2.9793
uc007eki.2	Sf3b5	chr10	12728255	12728989	9.88084	10.3309	10.2217	10.4273	10.8765	10.8003	9.95151	10.2273	10.8141	10.5797
uc007ekm.2	Plagl1	chr10	12810593	12851501	2.9752	3.14395	3.07708	2.06539	4.08746	3.05612	4.22451	3.05058	2.05092	2.56426
uc007ekp.1	Ltv1	chr10	12898443	12912943	7.96896	7.76286	6.07708	6.92338	7.3837	7.67083	8.02662	7.92439	7.56662	7.92474
uc007ekw.1	Fuca2	chr10	13220833	13237081	1.81766	1.3366	3.07708	0.480432	2.32193	3.05612	2.24876	1.86615	2.05092	2.30123
uc007ela.2	Adat2	chr10	13272712	13283182	7.44365	7.60338	6.07708	5.80236	7.14975	7.14358	7.60631	7.83717	7.89013	7.79308
uc007elb.1	Aig1	chr10	13366860	13588636	3.40262	3.50652	4.07708	4.65036	4.52356	4.48908	3.5118	2.86615	4.05092	3.50286
uc007elg.1	Hivep2	chr10	13685882	13871184	1.92457	2.3366	3.07708	3.28779	1	0.734188	1.14923	1.40672	2.05092	0.979301
uc007elk.1	Gpr126	chr10	14122390	14264842	4.13958	3.3366	6.399	6.15286	6.40939	6.60455	4.98573	4.23961	5.09532	5.30123
uc007elr.1	AK021178	chr10	15511582	15526871	3.73193	3.50652	2.07708	0.480432	2.32193	1.31915	4.55132	4.65465	4.22085	3.62316
uc007elt.2	Cited2	chr10	17443033	17445480	4.0945	4.42406	3.07708	3.06539	3.16992	3.54154	3.6638	3.45112	1.05092	2.56426
uc007elw.1	Heca	chr10	17619889	17667873	6.02411	6.42406	6.66204	6.41117	5.42626	5.61683	6.12323	6.23327	5.60551	5.59401
uc007eme.1	Ccdc28a	chr10	17933490	17954787	3.36514	3.92156	3.66204	2.48043	3.70044	3.98212	3.47115	3.2647	2.63589	4.02369
uc007emf.1	Ccdc28a	chr10	17936589	17954787	3.28714	2.92156	3.07708	0.480432	2	1.73419	2.42933	1.72865	2.85828	2.56426
uc007emn.1	D10Bwg1379e	chr10	18307816	18463564	2.28714	2.65852	2.07708	0.480432	2.32193	1.31915	3.19985	3.79904	3.05092	2.30123
uc007emz.1	Perp	chr10	18564876	18576878	9.52661	9.7203	4.88443	4.72836	10.5708	10.5139	8.04923	7.84135	9.14896	9.12778
uc007eng.1	Ifngr1	chr10	19311763	19330031	6.47036	6.16949	7.20636	7.23532	7.29462	7.45529	6.42933	6.01405	6.8711	6.65173
uc007enk.1	Slc35d3	chr10	19567722	19571265	3.02411	3.14395	4.88443	1.48043	7.45121	7.01959	3.42933	2.86615	4.37285	4.56426
uc007enw.1	Bclaf1	chr10	20042774	20064419	1.70218	2.3366	2.07708	1.48043	2.80735	0.734188	2.92683	1.86615	2.63589	2.67974
uc007eol.2	Hbs1l	chr10	21015784	21031004	6.28212	5.86016	4.399	4.18087	3.32193	3.73419	5.9785	5.95362	5.40848	5.50286
uc007eox.2	Sgk1	chr10	21714471	21719708	6.76827	4.42406	3.66204	2.80236	1.58496	3.19362	5.14923	6.03608	4.57449	4.06676
uc007epc.1	AK053193	chr10	21864109	21868629	5.63292	6.35896	4.07708	3.93986	4.52356	4.59217	4.12323	4.07915	3.51036	4.2647
uc007epk.2	C920009B18Rik	chr10	22026525	22032748	1.11722	0.336596	2.07708	0.480432	5.78136	5.90411	1.8013	1.86615	2.85828	3.78666
uc007epl.2	C920009B18Rik	chr10	22026525	22041571	4.421	4.24349	4.07708	2.80236	2	3.19362	5.16205	5.00664	5.22085	4.37162
uc007epn.2	Gm10825	chr10	22122618	22127276	2.11722	3.14395	3.66204	3.93986	1	1.73419	1.5118	0.72865	2.05092	1.78666
uc007epp.2	Tbpl1	chr10	22423682	22451253	3.78964	3.50652	4.07708	4.18087	3.58496	3.05612	3.62727	3.93028	3.05092	1.9793
uc007epw.2	Rps12	chr10	23504989	23507015	8.67085	8.56541	7.50334	7.52483	8.90989	8.659	9.63707	9.48887	9.17246	9.10987
uc007eqa.2	1110021L09Rik	chr10	23516791	23547774	5.49226	5.72891	7.07708	7.12429	5.16993	5.3489	6.29607	6.31961	6.20067	6.2647
uc007equ.1	Moxd1	chr10	23943322	24022589	4.32667	3.79603	7.12147	6.88982	4	3.05612	2.14923	2.57665	2.85828	0.979301
uc007eqv.1	AK014660	chr10	24309110	24315618	2.81766	2.92156	2.07708	0.480432	3.45943	2.73419	1.92683	1.86615	0.0509239	1.9793
uc007erd.2	Med23	chr10	24589791	24614156	2.11722	1.92156	3.66204	2.48043	2.32193	1.73419	2.24876	0.991685	2.37285	1.30123
uc007eri.1	Akap7	chr10	24888895	25018969	4.1833	3.3366	3.07708	3.80236	4.58496	5.12651	4.89646	4.18808	4.44324	4.47115
uc007esa.1	L3mbtl3	chr10	25995257	26093762	0.117216	1.92156	4.07708	0.480432	2.58496	1.73419	1.34187	-0.00831527	0.0509239	1.56426
uc007ese.1	Arhgap18	chr10	26492317	26638454	2.76107	2.3366	8.56893	8.52483	2	3.19362	1.34187	0.72865	2.63589	2.14923
uc007esj.1	Ptprk	chr10	27794625	27984479	2.02411	3.3366	2.07708	0.480432	3.16992	2.05612	2.04231	1.57665	1.63589	3.83728
uc007etc.2	Cenpw	chr10	29914387	29920346	6.384	6.00902	5.247	4.18087	7.14975	7.19362	7.05612	6.95362	7.59008	7.23197
uc007etg.1	Hint3	chr10	30328012	30338172	5.85868	5.3366	4.07708	4.72836	5.55459	5.48908	6.34187	6.24593	6.07329	5.99053
uc007etq.1	Hddc2	chr10	31033210	31047892	7.25421	6.90645	6.83196	6.95617	6.90689	6.87374	7.8176	7.72865	7.69478	7.58663
uc007etu.2	Rnf217	chr10	31221692	31329531	4.80372	4.86016	6.66204	7.00399	7.45943	7.44843	4.40796	4.28937	4.37285	5.10858
uc007eun.1	Rwdd1	chr10	33716360	33739422	9.02636	8.6358	8.28653	8.14577	7.77479	8.05612	8.87617	8.59284	8.12239	8.23669
uc007euq.1	Fam26e	chr10	33811157	33816325	3.47477	3.3366	3.66204	1.48043	2.32193	2.54154	5.84967	5.81611	4.75136	4.9335
uc007eus.1	Dse	chr10	33871198	33927357	9.62253	9.61968	5.07708	4.38732	7.49185	7.62901	10.2199	10.0658	9.05092	9.28308
uc007eut.2	Tspyl1	chr10	34001995	34004691	9.56688	9.40537	8.77752	8.72361	9.41574	9.29261	9.3677	9.29089	9.41067	9.42224
uc007euu.1	Tspyl4	chr10	34017226	34021126	5.96271	6.19458	8.50334	8.15286	6.24793	6.22604	6.38627	6.36672	6.57449	6.42224
uc007eve.1	Hdac2	chr10	36694349	36715917	2.43914	2.65852	3.07708	3.48043	0	1.73419	3.47115	3.45112	3.05092	2.43873
uc007evf.1	Hdac2	chr10	36694349	36721694	8.65055	8.68532	8.50334	8.45771	6.79442	7.20992	8.52427	8.11925	7.13839	7.5262
uc007evg.1	Marcks	chr10	36853048	36858732	8.82544	9.02659	11.2595	11.1252	9.59619	9.50072	9.04577	8.60517	8.16467	8.32803
uc007evh.1	AK017779	chr10	36857329	36858730	2.70218	3.3366	6.83196	6.83798	4.80735	4.98212	2.42933	3.49418	2.37285	2.78666
uc007evi.1	AK040320	chr10	36859719	36871121	2.36514	3.3366	3.07708	3.80236	2	1.31915	3.76814	2.49418	3.75136	2.67974
uc007evq.2	Lama4	chr10	38685320	38829994	4.76107	4.24349	7.56893	7.38732	8.36632	8.42768	4.17476	3.76427	6.63589	6.87412
uc007evt.1	Tube1	chr10	38853828	38861792	0.117216	2.3366	2.07708	2.06539	2.32193	1.31915	1.14923	1.72865	2.37285	2.14923
uc007evx.2	Fyn	chr10	39089604	39285180	2.02411	0.336596	4.399	4.06539	2	2.05612	0.663799	1.21408	1.63589	-0.020699
uc007ewa.1	Traf3ip2	chr10	39332739	39375113	6.72824	6.67645	6.247	6.67026	7.59246	7.48908	7.19674	7.46742	7.67298	7.74417
uc007ewb.1	AK164126	chr10	39341219	39451773	2.02411	0.336596	6.93506	7.24862	3.70044	3.90411	4.04231	4.07915	3.75136	4.02369
uc007ewd.1	Rev3l	chr10	39451965	39595011	3.28714	3.50652	7.7495	7.13864	3.16992	3.19362	4.04231	3.86615	4.37285	4.22723
uc007ewe.1	Sez4	chr10	39547515	39562629	2.28714	2.3366	3.66204	3.28779	2.58496	1.31915	3.89646	3.05058	3.51036	3.62316
uc007ewh.1	2010001E11Rik	chr10	39640187	39646729	1.70218	2.65852	2.07708	2.80236	2.32193	2.73419	1.6638	0.72865	1.05092	3.14923
uc007ewl.2	AI317395	chr10	39721378	39745074	0.117216	1.3366	2.07708	2.06539	2.58496	2.31915	2.5898	1.86615	2.85828	1.78666
uc007ewm.2	Slc16a10	chr10	39753340	39862060	4.30704	4.42406	4.07708	3.80236	4.39232	4.25775	3.73419	4.53601	3.37285	4.10858
uc007ewo.1	Rpf2	chr10	39943051	39966785	3.07141	3.65852	3.66204	3.06539	2.32193	3.05612	3.38627	2.49418	3.37285	2.88619
uc007ews.2	Amd2	chr10	40007264	40021992	10.2172	9.78987	8.90997	8.76583	8.94837	8.89406	10.2785	10.0001	9.35926	9.67887
uc007exd.1	9030224M15Rik	chr10	40403087	40530889	0.439144	0.336596	2.07708	0.480432	4.45943	4.86347	-0.0731664	0.406722	2.37285	1.78666
uc007exe.2	Cdc40	chr10	40552698	40602949	5.44813	4.72891	3.66204	3.93986	3.32193	3.73419	4.8013	4.16161	3.37285	3.9793
uc007exg.2	Cdc40	chr10	40564969	40602949	3.07141	3.79603	3.07708	4.06539	3	3.73419	4.49162	3.96131	3.63589	3.43873
uc007exi.2	Wasf1	chr10	40603339	40658375	5.8721	6.35896	7.43463	7.28779	7.05528	6.66493	6.50174	6.58663	5.54278	5.50286
uc007exk.1	Fig4	chr10	40907977	41023047	9.17046	9.21924	7.12147	7.26179	8.26679	8.29261	9.97168	9.94685	9.42379	9.53772
uc007exl.1	Zbtb24	chr10	41170201	41173274	4.8721	5.29079	4.399	4.87275	5.24793	5.19362	5.28439	5.34924	5.33633	5.84967
uc007exs.1	Smpd2	chr10	41206507	41210136	1.81766	0.336596	4.399	3.06539	1	1.73419	1.92683	2.21408	2.85828	1.56426
uc007exv.1	Cd164	chr10	41239305	41250848	10.2087	10.1961	8.69179	8.89828	9.50383	9.54154	10.8728	10.4998	9.81081	10.0773
uc007exw.2	Ccdc162	chr10	41258654	41307559	1.81766	1.92156	2.07708	0.480432	3.70044	3.98212	1.5118	2.31361	3.75136	2.88619
uc007eye.2	Sesn1	chr10	41530379	41628242	4.64078	4.58452	4.07708	4.06539	2.58496	2.54154	6.00008	6.25221	5.57449	5.40557
uc007eyk.1	AK008417	chr10	41901650	41905282	8.91812	8.90265	8.61623	8.54652	7.87036	8.13933	8.80437	8.72074	8.72335	8.6123
uc007eyr.2	Snx3	chr10	42221859	42255175	10.1732	10.1196	10.7844	10.6935	10.1737	10.0448	10.4432	10.5663	10.4292	10.4024
uc007eyu.1	Ostm1	chr10	42398722	42419797	3.11722	1.3366	3.07708	2.48043	2	2.73419	3.04231	3.16161	1.05092	2.67974
uc007eyv.1	Ostm1	chr10	42398722	42422261	6.76827	6.84439	5.247	5.80236	5.20945	5.01959	6.58028	6.35509	5.47719	5.89816
uc007eyz.2	Sec63	chr10	42481301	42552320	1.92457	1.92156	4.66204	2.06539	3.32193	3.43463	2.92683	1.72865	2.63589	2.43873
uc007ezh.2	Pdss2	chr10	42941291	43065922	2.28714	1.92156	3.07708	0.480432	2	2.54154	1.5118	1.99168	2.05092	1.30123
uc007ezi.2	Pdss2	chr10	42941291	43160054	4.60907	4.58452	4.66204	3.48043	3.45943	4.31915	5.4504	4.96131	4.22085	4.88619
uc007ezk.1	1700021F05Rik	chr10	43244926	43260800	6.72455	6.58452	6.399	6.88982	6.04439	5.98212	7.13953	7.07915	6.68028	6.76066
uc007ezl.1	Cd24a	chr10	43298974	43304071	9.51114	9.34222	10.3578	10.2503	9.48985	9.54957	6.99651	7.03972	7.53474	7.89518
uc007ezn.1	Qrsl1	chr10	43593995	43621542	5.9752	5.89118	4.399	5.12429	5.08746	5.3489	5.9785	6.20114	5.90891	5.84967
uc007ezo.1	Qrsl1	chr10	43600719	43621542	0.702178	2.65852	3.66204	2.48043	1	-0.265812	2.8013	2.40672	3.05092	3.06676
uc007ezp.1	Rtn4ip1	chr10	43621612	43667668	7.29214	7.14395	6.98397	7.45771	7.62936	7.51555	7.90411	7.88246	7.88381	7.56802
uc007ezq.2	Aim1	chr10	43670112	43724652	5.21525	4.98045	2.07708	2.06539	8.57365	8.80565	2.6638	3.40672	7.05092	7.35868
uc007ezt.1	Atg5	chr10	43988163	44084097	8.54033	8.51651	7.07708	7.55725	7.01123	7.13507	8.83372	8.47281	7.75828	7.98773
uc007ezx.1	Prep	chr10	44787019	44878801	9.74839	9.96048	9.97794	10.1152	11.1383	11.1926	9.76814	9.83246	9.9533	9.89742
uc007ezz.1	Bves	chr10	45055567	45089514	3.76107	4.03704	4.399	4.65036	5.08746	5.73419	3.24876	3.10716	3.05092	3.67974
uc007fac.1	Lin28b	chr10	45176388	45205583	2.9752	2.65852	2.07708	0.480432	2.80735	2.31915	4.0143	3.2647	1.05092	2.14923
uc007fad.2	Hace1	chr10	45297634	45432151	5.931	5.69415	5.77752	5.28779	4.80735	4.86347	6.14277	6.31361	5.66563	5.59401
uc007fak.2	Ascc3	chr10	50312474	50571008	6.02411	6.09148	6.53651	6.15286	5.64386	5.22604	6.18736	6.0862	6.13839	6.50286
uc007fbc.1	Dcbld1	chr10	51953424	52008351	3.20468	4.14395	3.66204	3.28779	2.80735	2.90411	4.78481	4.83299	4.22085	3.9793
uc007fbi.2	Nus1	chr10	52137352	52159998	8.57357	8.34222	7.03127	7.09514	7.26679	7.17713	8.52302	8.21247	7.58231	7.8185
uc007fbk.2	Slc35f1	chr10	52410306	52831428	2.43914	2.3366	7.95972	8.03502	1	2.31915	1.8013	1.40672	0.0509239	1.78666
uc007fbn.1	Gm9766	chr10	53016059	53099657	2.28714	3.14395	5.247	5.83798	1.58496	3.19362	3.6638	2.31361	2.85828	2.78666
uc007fbr.1	Asf1a	chr10	53316766	53329021	8.56946	8.37551	7.20636	7.03502	7.24793	7.48908	8.55983	8.48887	7.83883	7.71401
uc007fca.1	D630037F22Rik	chr10	55734099	55948495	5.16161	4.98045	5.66204	5.00399	4.52356	4.12651	4.49162	5.12097	4.57449	4.37162
uc007fcb.1	Msl3l2	chr10	55826722	55836686	4.84514	4.86016	5.07708	5.18087	4.58496	5.09174	6.23061	5.89054	5.37285	5.20812
uc007fck.2	Hsf2	chr10	57206190	57232949	8.07577	7.75445	7.50334	6.80236	6.04439	6.3489	7.91173	7.79689	6.59008	6.92767
uc007fcm.2	Serinc1	chr10	57235581	57252335	7.86037	8.0231	8.77752	8.65536	7.33092	7.38524	7.58266	7.30759	7.11701	7.57549
uc007fcn.2	AIGP-2	chr10	57245030	57252335	3.32667	3.50652	3.07708	3.28779	3.32193	4.05612	3.47115	3.72865	3.51036	3.67974
uc007fcu.1	Smpdl3a	chr10	57514349	57531636	2.8721	2.65852	5.77752	5.60971	3.45943	4.12651	2.14923	2.31361	4.51036	4.40557
uc007fdd.1	Ranbp2	chr10	57909599	57956902	7.34603	6.74599	8.28653	8.05786	5.85798	6.27335	7.10009	7.09322	6.81911	7.3236
uc007fdf.2	Ccdc138	chr10	57960684	58038992	4.13958	3.92156	3.66204	3.28779	2	3.31915	4.06979	3.36092	3.85828	2.78666
uc007fdg.1	Ccdc138	chr10	57960952	57963996	4.9752	5.19458	4.399	4.80236	3.90689	4.25775	4.5118	5.06493	5.13839	4.56426
uc007fdn.2	2016-09-10	chr10	58626859	58684595	3.92457	3.50652	5.247	3.65036	4.08746	2.90411	4.5898	3.57665	3.05092	3.06676
uc007fdt.2	Ccdc109a	chr10	58911180	59079440	4.26696	4.42406	5.07708	5.48043	5.97728	5.84271	4.17476	4.88246	5.09532	4.70722
uc007fdv.1	Cbara1	chr10	59165382	59207644	3.54348	2.92156	3.07708	0.480432	2	2.05612	2.42933	2.40672	3.22085	2.14923
uc007fdw.1	Cbara1	chr10	59165382	59214453	2.11722	3.14395	2.07708	1.48043	2.32193	3.64108	2.73419	2.57665	1.63589	2.67974
uc007fdz.1	Dnajb12	chr10	59342338	59359523	1.70218	1.92156	3.07708	3.93986	3.45943	2.54154	1.6638	1.86615	2.37285	1.9793
uc007fed.1	AK046160	chr10	59356631	59360464	0.439144	0.336596	4.66204	4.28779	4.32193	4.59217	2.34187	-0.00831527	3.05092	1.9793
uc007fee.1	Ddit4	chr10	59412422	59414518	8.43689	8.64948	9.22682	9.52209	9.85175	9.88139	7.389	7.64751	8.64711	8.70211
uc007fef.1	Anapc16	chr10	59450656	59465860	8.34242	8.15678	8.64693	8.89406	8.64024	8.47902	8.1183	8.31511	8.44324	8.40766
uc007fel.1	Spock2	chr10	59569004	59596661	5.23616	5.19458	6.16454	7.09514	5.80735	6.20992	5.47115	5.68285	5.88381	6.02369
uc007fev.1	Cdh23	chr10	59766021	60159238	-1.88278	0.336596	2.07708	2.48043	3.32193	2.31915	2.24876	1.21408	3.22085	2.43873
uc007ffh.1	AK158810	chr10	60394738	60403690	5.083	4.98045	4.66204	4.28779	4	3.90411	4.98573	5.384	4.75136	4.91004
uc007ffj.2	Pcbd1	chr10	60552090	60557077	4.73193	4.72891	4.88443	3.80236	7.50779	7.35624	5.41869	5.2647	6.29885	6.18875
uc007ffx.2	X99384	chr10	60782404	60846271	0.439144	2.92156	3.07708	0.480432	2.32193	2.54154	0.663799	-0.00831527	2.05092	-0.020699
uc007ffy.2	Nodal	chr10	60880719	60888085	9.80547	10.0301	2.07708	0.480432	9.6865	9.72003	9.69942	9.91798	10.0761	10.0872
uc007ffz.2	DQ716436	chr10	60892008	60893694	7.54348	7.41341	8.09944	8.24198	8.56605	8.26557	7.618	7.57915	7.62835	7.51846
uc007fga.1	Eif4ebp2	chr10	60895244	60915417	8.41757	8.77122	8.67699	8.71405	9.27146	8.96541	8.45431	8.56154	8.5862	8.40557
uc007fgc.1	Lrrc20	chr10	60938580	61044976	5.50092	5.622	7.72093	7.82916	7.45121	6.99158	6.04231	6.00664	5.98166	5.82479
uc007fge.1	Ppa1	chr10	61111368	61136913	11.7181	11.5804	9.17511	9.41412	10.6926	10.7813	11.795	11.816	11.3587	11.4614
uc007fgg.1	Sar1a	chr10	61143068	61156045	10.5437	10.2937	10.0883	10.1297	10.1497	10.2955	10.7226	10.7114	10.3212	10.4387
uc007fgh.2	Tysnd1	chr10	61158261	61165521	7.931	8.41341	9.79132	10.0408	10.3242	10.1168	8.44385	8.7488	9.44324	9.27736
uc007fgi.2	Aifm2	chr10	61178010	61201400	5.1059	5.3366	4.399	4.48043	5.93074	5.61683	5.5317	5.89858	5.54278	5.73419
uc007fgk.2	Aifm2	chr10	61178010	61202008	1.81766	2.65852	2.07708	0.480432	1.58496	2.05612	2.5898	0.72865	2.63589	1.9793
uc007fgm.1	H2afy2	chr10	61201394	61246612	7.03309	7.32528	8.99594	9.14932	8.11374	8.00097	8.7765	8.79904	8.10621	8.14923
uc007fgr.1	Ass1	chr10	61533769	61535319	5.44813	7.72891	3.66204	3.48043	7.53916	7.01031	5.68172	5.69212	7.51853	7.9422
uc007fgx.2	Tacr2	chr10	61715185	61728738	0.702178	1.3366	2.07708	0.480432	5.12928	4.59217	2.04231	1.57665	3.63589	3.37162
uc007fgy.2	Hk1	chr10	61731602	61803169	2.20468	1.3366	4.07708	3.48043	4.08746	3.90411	1.6638	2.65465	2.63589	2.30123
uc007fhb.1	AK008969	chr10	61803003	61812599	0.439144	0.336596	2.07708	2.80236	3	3.43463	0.926834	0.991685	2.05092	0.979301
uc007fhc.1	Hkdc1	chr10	61845884	61885205	1.70218	2.65852	3.66204	0.480432	5.35755	5.05612	1.6638	1.86615	3.95781	3.78666
uc007fhe.2	4930507D05Rik	chr10	61911907	61914101	3.99986	3.65852	5.07708	4.87275	4.24793	4.59217	4.14923	4.05058	4.63589	4.95658
uc007fhf.2	Vps26a	chr10	61917590	61949346	0.924571	0.336596	2.07708	3.06539	1.58496	1.73419	-0.0731664	1.21408	2.37285	2.14923
uc007fhi.1	Srgn	chr10	61957175	61970503	3.07141	3.50652	2.07708	0.480432	3	3.19362	2.04231	1.72865	2.63589	3.06676
uc007fhn.1	Ddx21	chr10	62042994	62065046	11.3436	11.131	9.43463	9.42588	9.90539	10.0033	11.0949	11.0672	10.3729	10.6763
uc007fhp.1	Ddx50	chr10	62078770	62113946	1.11722	2.3366	2.07708	3.28779	2.58496	2.05612	0.341871	2.10716	2.37285	1.30123
uc007fhq.1	Ddx50	chr10	62085918	62097254	2.50953	2.65852	3.66204	3.65036	2.32193	2.54154	3.09676	2.57665	2.63589	1.9793
uc007fja.2	Ccar1	chr10	62206675	62255116	4.76107	3.92156	5.247	6.33841	4.16993	3.19362	4.36424	4.16161	4.57449	4.53389
uc007fjc.2	Ccar1	chr10	62232568	62255116	5.04795	4.50652	4.88443	4.65036	4.08746	5.68839	5.5118	5.68285	5.83228	5.10858
uc007fjf.1	Tet1	chr10	62275456	62328011	2.02411	3.3366	2.07708	0.480432	2	1.73419	3.09676	3.65465	4.05092	2.88619
uc007fjh.1	Slc25a16	chr10	62383380	62409242	7.68897	7.622	6.60064	6.38732	6.18982	6.22604	7.67503	7.57163	6.90891	7.16913
uc007fji.2	Dna2	chr10	62409776	62428866	2.20468	2.3366	3.66204	3.06539	1.58496	2.90411	3.19985	2.86615	3.05092	2.78666
uc007fjj.2	Dna2	chr10	62409776	62436936	7.3746	7.55576	4.88443	4.06539	5.78136	5.88394	8.33056	7.82457	6.99344	7.39293
uc007fjl.1	Rufy2	chr10	62442970	62453041	2.11722	1.3366	4.07708	2.48043	1.58496	1.73419	2.04231	0.991685	2.63589	2.14923
uc007fjm.1	Rufy2	chr10	62442970	62479957	3.54348	4.3366	4.399	3.06539	3.32193	3.19362	3.55132	3.79904	2.37285	3.9335
uc007fjn.1	Rufy2	chr10	62442970	62481490	4.95011	4.24349	5.07708	5.12429	4.70044	4.37804	5.24876	4.81611	4.13839	4.9335
uc007fjo.1	Hnrnph3	chr10	62477411	62486597	2.92457	2.92156	2.07708	2.48043	2	2.73419	3.5118	3.40672	3.05092	2.56426
uc007fjq.2	AK156477	chr10	62485292	62486356	3.11722	3.14395	3.66204	3.48043	3.45943	3.19362	3.6638	3.40672	4.05092	3.30123
uc007fjr.1	Pbld2	chr10	62487259	62521560	2.64078	2.92156	2.07708	3.65036	3.16992	2.05612	2.42933	2.99168	3.22085	2.14923
uc007fju.1	Pbld1	chr10	62524305	62540284	7.05679	6.81233	5.98397	5.43463	7.16993	7.29643	7.72773	7.68749	7.86471	7.17406
uc007fka.2	Herc4	chr10	62706544	62729694	2.70218	3.3366	3.07708	3.28779	3.16992	2.73419	4.55132	4.07915	4.63589	4.62316
uc007fkb.2	Herc4	chr10	62706544	62737181	3.70218	3.3366	2.07708	3.48043	4.39232	4.19362	4.89646	4.57665	4.69478	4.67974
uc007fls.2	Jmjd1c	chr10	66648497	66719074	1.43914	1.3366	5.07708	4.72836	2.32193	2.54154	0.926834	1.99168	1.05092	0.979301
uc007flu.1	mKIAA1380	chr10	66701554	66708166	4.30704	4.03704	5.77752	5.9067	4.39232	4.68839	5.24876	5.07915	5.13839	4.56426
uc007flw.1	Nrbf2	chr10	66729436	66748029	8.06996	7.88349	6.46939	6.45771	7.31288	7.17713	7.8849	7.90457	7.74441	7.83417
uc007flz.2	Ado	chr10	67007258	67011703	9.46926	9.58689	9.90362	9.97229	9.81218	9.78268	9.65928	9.49683	9.69658	9.71062
uc007fmd.1	Rtkn2	chr10	67442345	67506612	2.76107	2.92156	4.399	3.65036	1.58496	2.54154	3.38627	3.16161	2.85828	2.43873
uc007fmn.1	AK044689	chr10	68672509	68675846	-0.297822	1.92156	4.399	4.72836	3.32193	3.43463	2.86543	3.21408	3.37285	3.14923
uc007fmr.1	Cdk1	chr10	68799382	68815660	11.6899	11.4691	10.6844	10.8413	11.3332	11.4229	11.9719	12.0149	11.9101	11.8901
uc007fnw.2	Fam13c	chr10	69903657	70007754	1.81766	1.92156	3.07708	3.93986	1	1.73419	1.8013	1.72865	2.05092	1.56426
uc007fom.1	Tfam	chr10	70688224	70700792	4.11722	3.92156	3.66204	4.18087	3.32193	2.90411	4.75126	4.78176	4.37285	3.67974
uc007foo.2	Ube2d1	chr10	70717727	70748010	7.96114	8.00902	8.20636	8.30698	8.46352	8.24989	7.83172	8.02694	7.67298	7.67974
uc007foq.1	Cisd1	chr10	70793241	70807597	9.44477	9.26141	9.31548	9.32905	9.78953	9.79488	9.44385	9.7247	9.85667	9.73001
uc007for.1	Ipmk	chr10	70810540	70840162	3.32667	3.14395	2.07708	0.480432	3.90689	3.43463	3.34187	3.79904	4.13839	3.78666
uc007foz.1	Zwint	chr10	72117642	72132537	3.89858	2.92156	4.399	3.93986	2.32193	3.43463	2.92683	3.2647	2.63589	3.43873
uc007fpa.1	Zwint	chr10	72117642	72137712	8.2695	8.19458	9.0883	8.93986	7.25739	7.78404	8.503	8.07206	8.16467	7.94797
uc007fqb.2	Bcr	chr10	74523640	74647668	7.90021	8.18834	9.03127	8.99613	9.84078	9.58438	7.67055	7.93224	7.98756	8.0747
uc007fqd.1	mKIAA0376	chr10	74674817	74706661	3.28714	3.50652	4.07708	2.80236	2.32193	2.54154	4.0143	3.53601	3.05092	3.43873
uc007fqh.1	Adora2a	chr10	74779687	74797533	1.70218	2.3366	4.399	2.80236	2.80735	2.73419	1.34187	1.57665	2.63589	2.56426
uc007fqm.1	Snrpd3	chr10	74980786	74998185	8.47696	8.49647	7.66204	7.42295	7.67243	7.39952	8.40392	8.16495	7.95781	7.91299
uc007fqt.2	Susd2	chr10	75099363	75106753	3.60907	3.3366	2.07708	1.48043	2	3.31915	3.55132	3.69212	4.05092	3.62316
uc007fqx.1	Cabin1	chr10	75108854	75227102	8.66796	8.72891	9.15389	9.29742	9.53916	9.33038	8.92495	9.14397	9.00803	9.15298
uc007fqz.1	Cabin1	chr10	75179373	75196521	3.76107	3.50652	3.66204	3.28779	3.80735	3.98212	3.89646	3.21408	3.75136	3.22723
uc007fra.1	Ddt	chr10	75233977	75236119	8.86709	8.96959	7.16454	7.5028	8.5157	8.59837	8.31629	8.50475	8.83228	8.6658
uc007frb.1	Gstt3	chr10	75236866	75244159	6.68707	6.71164	5.07708	5.48043	8.53138	8.42419	5.11006	5.17491	6.27974	6.64464
uc007frc.2	Gstt1	chr10	75246557	75261329	4.49226	3.50652	7.16454	7.28779	3.80735	3.82165	3.47115	3.16161	2.63589	3.14923
uc007ftc.1	Mif	chr10	75322097	75322995	12.0952	12.611	11.5908	11.8478	13.2332	13.1505	11.8337	12.1563	12.5032	12.2513
uc007fto.1	Mmp11	chr10	75385968	75395208	4.92457	4.65852	2.07708	2.06539	5.12928	5.16045	5.31915	5.56659	5.37285	5.24609
uc007fts.1	AK144847	chr10	75400467	75403417	3.02411	3.65852	2.07708	1.48043	6.22882	5.82165	4.5317	4.18808	4.37285	4.33685
uc007ftt.1	Vpreb3	chr10	75411056	75412391	3.11722	2.92156	2.07708	0.480432	5.49185	5.16045	2.42933	3.45112	3.95781	3.56426
uc007ftu.2	Gm5134	chr10	75417258	75472334	3.54348	3.50652	2.07708	0.480432	2.80735	2.54154	6.02837	5.73764	6.39077	6.44691
uc007ftw.2	Zfp280b	chr10	75495356	75505714	9.92819	9.89884	6.46939	6.88982	8.10852	8.11357	10.4868	10.463	9.55872	9.69526
uc007ftx.1	Slc5a4b	chr10	75521365	75573763	4.0945	3.65852	2.07708	0.480432	5.32193	5.01959	5.90411	6.16161	7.51036	7.37591
uc007fuc.2	S100b	chr10	75716580	75724064	2.11722	2.65852	5.07708	4.56789	1	1.73419	-1.65813	-1.59328	0.0509239	-1.0207
uc007fuj.1	Pcnt	chr10	75813998	75879657	0.702178	0.336596	2.07708	2.48043	2.32193	1.31915	2.42933	1.57665	2.05092	2.30123
uc007fum.1	Pcnt	chr10	75864076	75876777	1.57665	2.65852	2.07708	2.06539	2	1.73419	1.5118	2.49418	2.37285	2.30123
uc007fuo.1	Ybey	chr10	75922311	75931859	8.36751	8.21311	7.03127	7.18087	8.45533	8.44843	8.29461	8.16993	8.46031	8.43668
uc007fup.1	Mcm3ap	chr10	75931715	75978602	10.9837	10.9291	8.98397	9.55992	10.3365	10.4459	11.702	11.8321	11.7282	11.725
uc007fuu.2	Col6a2	chr10	76058500	76086149	1.70218	1.92156	2.07708	3.28779	4.45943	4.98212	2.5118	3.05058	3.75136	3.22723
uc007fux.1	Col6a1	chr10	76171536	76188789	5.59295	5.69415	5.88443	5.97228	8.60733	8.67083	6.36424	6.54115	7.63589	7.51068
uc007fve.1	Slc19a1	chr10	76496025	76509013	2.81766	3.3366	5.07708	3.06539	5.35755	4.86347	3.76814	3.61618	3.37285	3.56426
uc007fvh.2	Col18a1	chr10	76514923	76629275	2.70218	4.14395	3.66204	0.480432	4.08746	2.31915	1.14923	1.72865	3.05092	1.9793
uc007fvi.2	Gm10941	chr10	76720517	76721968	2.11722	1.92156	4.399	3.80236	0	1.73419	1.5118	0.991685	3.05092	0.564264
uc007fvx.1	Pttg1ip	chr10	77044511	77061477	9.229	9.25248	9.7137	9.56789	9.94983	9.82959	9.3801	9.53665	10.0037	9.90486
uc007fvy.1	Sumo3	chr10	77068978	77081076	5.1059	4.58452	4.399	5.12429	3.16992	4.48908	3.6638	4.96131	4.85828	3.56426
uc007fvz.1	Sumo3	chr10	77069411	77081076	2.36514	1.92156	2.07708	3.28779	4.64386	4.12651	2.92683	2.79904	3.05092	2.88619
uc007fwa.1	Ube2g2	chr10	77085065	77108735	8.1382	8.31959	8.2669	8.47479	9.2738	9.06734	8.32344	8.23168	8.7304	8.54726
uc007fwi.2	Lrrc3	chr10	77360319	77365281	5.53507	5.92156	4.07708	3.80236	6.10852	5.77858	4.88103	4.51525	5.51036	5.45503
uc007fwn.1	1810043G02Rik	chr10	77441394	77448183	4.80372	5.24349	6.53651	6.67026	5.88264	5.61683	4.73419	4.51525	5.57449	4.91004
uc007fwo.2	Pfkl	chr10	77449693	77472541	11.2415	11.4672	10.9505	11.1826	11.978	11.9585	9.88732	10.2573	10.7154	10.6073
uc007fxi.1	Icosl	chr10	77532112	77542270	6.66411	6.67645	4.399	3.80236	5.64386	5.54154	6.58504	6.64513	6.80581	6.64464
uc007fxj.1	D10Jhu81e	chr10	77624811	77632513	8.40723	8.6358	8.88443	8.98028	9.21432	9.11789	8.68506	8.84967	9.40186	9.27851
uc007fxk.1	Pwp2	chr10	77633654	77647894	11.0179	11.0577	9.25699	9.5028	11.3009	11.2548	10.9497	11.1102	11.3484	11.3911
uc007fxl.1	wdp103	chr10	77644322	77647894	3.2465	3.3366	3.07708	3.65036	3.58496	3.19362	3.09676	2.79904	3.95781	3.22723
uc007fxm.1	Trappc10	chr10	77649470	77707387	8.74839	8.65852	9.56089	9.63778	9.66356	9.60609	8.74914	8.76867	9.20574	9.15423
uc007fxn.1	Trappc10	chr10	77664942	77671979	3.92457	4.42406	5.247	4.87275	4.45943	5.19362	4.91173	4.384	4.22085	4.59401
uc007fxq.1	Agpat3	chr10	77734307	77814445	1.81766	0.336596	4.07708	2.06539	3	2.05612	-0.658129	-0.593278	0.0509239	1.78666
uc007fxr.1	Agpat3	chr10	77736816	77815187	1.70218	1.3366	4.399	4.38732	3	4.12651	1.92683	0.991685	2.05092	-0.020699
uc007fxt.1	Cstb	chr10	77888414	77890367	8.87461	8.87187	6.93506	7.05029	7.99435	8.26167	8.43198	8.43325	9.03106	8.92328
uc007fxu.2	Pdxk	chr10	77899491	77927693	8.42555	8.46588	10.0658	10.1529	9.2503	9.02651	8.49795	8.76427	9.05935	8.90856
uc007fxw.1	Ilvbl	chr10	78037735	78044993	2.43914	1.92156	3.07708	2.06539	2	2.05612	2.73419	1.99168	2.37285	1.9793
uc007fyb.2	Syde1	chr10	78047247	78054709	7.34844	7.52642	10.4949	10.611	8.74483	8.50237	6.50678	6.83717	7.14896	7.05612
uc007fyg.2	Slc1a6	chr10	78243240	78277570	3.07141	3.14395	3.66204	3.06539	5.2854	4.77858	3.04231	2.10716	4.13839	4.43873
uc007fyo.2	2610008E11Rik	chr10	78527118	78560345	3.6718	1.92156	5.247	5.33841	3.16992	2.90411	2.42933	2.72865	3.85828	3.14923
uc007fyw.1	Mier2	chr10	79002989	79013151	2.20468	2.92156	4.399	3.48043	2.80735	1.31915	2.14923	2.31361	2.05092	1.9793
uc007fzd.2	Shc2	chr10	79080682	79100663	6.38868	6.86016	5.247	5.56789	6.78136	6.64108	5.58028	5.8076	6.22085	5.99053
uc007fzh.1	Gm16517	chr10	79132154	79138871	7.1967	7.79603	8.81854	9.10248	8.87652	8.48908	7.12323	7.35801	8.05092	7.86194
uc007fzi.1	Cdc34	chr10	79144939	79151143	11.2801	11.5491	10.8617	10.9419	12.1389	12.0459	11.2724	11.5046	11.9802	11.7893
uc007fzl.1	Bsg	chr10	79167102	79174724	2.50953	3.65852	3.66204	4.06539	3.58496	4.12651	3.04231	3.10716	4.13839	3.73419
uc007fzn.1	Hcn2	chr10	79179378	79198853	4.8854	5.65852	6.07708	5.87275	6.6865	6.85313	5.5317	5.89054	5.98166	5.9793
uc007fzo.2	Polrmt	chr10	79198869	79209326	2.57665	3.50652	3.66204	3.06539	3.58496	2.90411	1.34187	2.65465	2.63589	2.67974
uc007fzr.2	Rnf126	chr10	79221259	79229666	1.11722	1.3366	3.07708	2.48043	2	2.05612	1.92683	0.406722	1.05092	1.56426
uc007fzs.2	Fstl3	chr10	79240018	79245375	2.70218	2.92156	2.07708	0.480432	3	4.05612	1.92683	1.72865	2.05092	1.78666
uc007fzv.2	Palm	chr10	79256316	79280143	1.57665	2.92156	2.07708	2.48043	4.08746	3.82165	1.92683	1.21408	3.05092	3.14923
uc007gab.1	Ptbp1	chr10	79317349	79327178	2.76107	3.3366	4.07708	4.93986	4.80735	4.05612	3.47115	4.13464	3.75136	3.06676
uc007gam.1	Med16	chr10	79364582	79371066	3.32667	3.92156	3.66204	4.18087	3.90689	3.73419	4.27261	3.72865	3.63589	3.62316
uc007gan.1	C030046I01Rik	chr10	79372797	79379675	7.71527	7.92156	9.6545	9.5111	9.57932	9.3135	7.69942	7.65465	8.07329	7.90708
uc007gas.1	Wdr18	chr10	79422896	79425100	5.19403	4.65852	5.07708	4.80236	5.67243	5.31915	5.88103	5.79904	5.54278	5.08783
uc007gat.1	Wdr18	chr10	79422896	79431991	10.8327	11.1488	9.96582	10.1722	11.6821	11.5797	10.9905	11.2666	11.7418	11.5612
uc007gaz.1	Cnn2	chr10	79451344	79458145	9.79626	10.0491	7.28653	7.78421	10.5187	10.6847	9.21146	9.49153	9.36154	9.17652
uc007gbi.1	Polr2e	chr10	79498697	79502404	11.0461	11.338	10.0429	10.2519	11.218	11.1568	11.218	11.4832	11.9484	11.8066
uc007gbl.1	Gpx4	chr10	79516781	79519184	2.8721	4.03704	3.66204	3.06539	3.70044	4.68839	3.8013	3.79904	4.75136	4.53389
uc007gbs.1	Sno	chr10	79543154	79565447	4.8721	5.38099	5.66204	5.48043	6.02237	5.68839	5.34187	5.16161	5.33633	5.84967
uc007gbt.1	lkb1	chr10	79579091	79587630	4.73193	3.79603	4.66204	3.93986	5.12928	4.86347	4.84967	4.51525	4.69478	4.43873
uc007gbu.1	Stk11	chr10	79579280	79593215	4.50953	4.72891	4.399	5.23532	4.80735	4.37804	4.47115	4.40672	4.63589	4.33685
uc007gbv.1	lkb1	chr10	79588223	79593215	5.12844	5.29079	5.399	5.9067	6.50779	6.17713	5.38627	5.59655	6.40848	6.35434
uc007gbx.1	Dos	chr10	79593178	79602112	0.924571	2.3366	3.66204	3.06539	2.32193	3.73419	1.14923	0.991685	3.22085	2.56426
uc007gce.1	Cirbp	chr10	79630585	79634398	8.10021	8.30238	8.77752	8.58896	9.67772	9.69129	9.09509	9.02511	9.64711	9.5233
uc007gcf.1	1600002K03Rik	chr10	79635688	79637864	6.06558	5.58452	5.07708	5.56789	6.45943	6.14358	5.26073	5.44015	5.85828	5.67974
uc007gcg.2	Efna2	chr10	79642226	79652755	5.84514	6.56541	7.16454	7.27485	6.02237	5.82165	5.94178	6.10716	5.77884	5.56426
uc007gci.1	Ndufs7	chr10	79712196	79719537	8.78077	9.10809	10.0254	10.144	9.90689	9.84793	8.89069	9.29851	9.65455	9.48114
uc007gcn.2	Rps15	chr10	79755175	79756859	12.8206	13.1243	13.3011	13.403	13.5053	13.3837	12.7971	13.0439	13.4924	13.2802
uc007gcp.1	Apc2	chr10	79764564	79781001	4.95011	4.98045	9.06576	8.85112	5.78136	5.37804	3.42933	3.21408	4.37285	3.83728
uc007gcq.1	2310011J03Rik	chr10	79780999	79783293	8.17791	8.39729	8.94744	9.1774	9.48382	9.25186	8.05095	8.21729	8.86791	8.72917
uc007gcz.1	Mex3d	chr10	79843099	79850396	7.94852	8.35896	9.20636	9.19468	9.64926	9.44155	7.51929	7.7196	7.98166	7.7802
uc007gdc.1	Mbd3	chr10	79857924	79858340	4.64078	5.09148	2.07708	2.48043	4.08746	4.48908	3.89646	4.47281	5.18021	4.02369
uc007gdd.1	Uqcr	chr10	79865741	79869511	1.70218	2.65852	3.66204	3.28779	3.80735	3.73419	1.5118	1.57665	3.95781	2.78666
uc007gdo.1	Atp8b3	chr10	79982329	80001869	1.81766	2.92156	2.07708	1.48043	2	2.90411	1.34187	-0.593278	1.63589	1.56426
uc007gdq.1	Rexo1	chr10	80003670	80009547	1.57665	1.92156	4.88443	3.06539	2.58496	3.19362	1.14923	2.40672	1.63589	1.56426
uc007gds.1	Rexo1	chr10	80003670	80024305	7.94694	8.11796	8.99594	9.3038	9.16491	8.78676	7.9529	8.19789	8.32705	8.14421
uc007gdt.1	Klf16	chr10	80029865	80040041	8.44925	8.575	8.95972	9.03502	10.5411	10.1287	8.75761	8.83613	9.23332	9.01135
uc007gdu.1	AK133627	chr10	80041391	80043420	3.73193	3.79603	2.07708	2.06539	3.45943	3.64108	3.55132	3.86615	3.85828	4.18875
uc007gdx.1	Adat3	chr10	80065624	80070399	6.63685	7.0231	6.53651	6.63018	7.63662	7.20992	6.46081	6.82457	7.54278	7.42224
uc007gdz.1	Scamp4	chr10	80065997	80078528	1.57665	1.92156	3.66204	3.48043	3.16992	2.90411	2.14923	2.40672	3.22085	1.30123
uc007gea.2	Csnk1g2	chr10	80085524	80103516	4.04795	4.65852	5.53651	6.03502	4.70044	5.16045	4.12323	3.76427	4.75136	4.40557
uc007geb.2	Csnk1g2	chr10	80092400	80103516	0.439144	1.3366	3.07708	2.80236	3.16992	2.31915	0.926834	1.57665	2.63589	2.43873
uc007geh.1	Mobkl2a	chr10	80147997	80164565	8.60002	8.622	9.52829	9.62509	9.67948	9.6767	8.23669	8.37395	8.81248	8.64108
uc007gei.1	Mobkl2a	chr10	80162574	80164565	0.439144	1.92156	4.07708	2.80236	2	2.54154	0.926834	-0.593278	1.05092	0.564264
uc007gej.1	Izumo4	chr10	80165437	80168127	2.57665	3.65852	4.07708	4.28779	3.45943	4.48908	2.8013	3.21408	3.95781	3.62316
uc007gek.1	Ap3d1	chr10	80169722	80204956	10.4673	10.6517	10.5928	10.72	10.7013	10.4638	10.378	10.5195	10.5236	10.4876
uc007ger.1	Plekhj1	chr10	80258843	80261371	6.57665	6.92156	6.16454	7.13864	7.42626	7.42768	6.73419	6.90258	7.01671	6.84967
uc007get.1	Amh	chr10	80267992	80270393	1.11722	2.65852	4.399	3.06539	3	2.90411	1.6638	1.57665	3.05092	1.56426
uc007gey.2	Lingo3	chr10	80295547	80306784	4.73193	5.19458	6.16454	6.80236	7.85798	7.84793	4.14923	4.42909	4.63589	4.50286
uc007gez.1	Lsm7	chr10	80315565	80317954	3.47477	2.92156	4.399	4.06539	4.16993	3.54154	3.14923	3.2647	3.85828	3.78666
uc007gfi.2	Timm13	chr10	80362194	80363714	9.52714	9.82041	10.5888	10.877	11.0668	10.8884	9.55801	9.83822	10.3785	10.2129
uc007gfk.1	Lmnb2	chr10	80364107	80380990	7.4879	7.89884	7.63167	7.83798	8.71081	8.46211	7.49416	7.99918	8.2941	8.02643
uc007gfl.1	Gadd45b	chr10	80392835	80394949	7.61307	7.73748	5.07708	5.06539	8.76487	8.84532	7.62032	7.89255	8.9182	8.74251
uc007gfo.1	Diras1	chr10	80482334	80488122	3.99986	5.03704	4.07708	4.80236	4.39232	4.12651	3.5898	3.36092	2.63589	3.14923
uc007gfv.2	Thop1	chr10	80532827	80545105	11.1121	11.5202	11.3877	11.6715	12.6416	12.4674	11.314	11.6235	12.1167	11.9786
uc007gfw.1	Creb3l3	chr10	80547077	80561617	2.57665	2.65852	2.07708	0.480432	2	2.90411	2.14923	2.65465	2.85828	2.30123
uc007ggc.2	Pias4	chr10	80616715	80630465	6.35084	6.84439	6.07708	6.26179	7.03342	6.61683	6.13629	6.32559	6.96979	6.79948
uc007ggd.2	PIAS-gamma	chr10	80625787	80630465	3.47477	2.65852	3.07708	5.00399	3.16992	2.73419	2.73419	3.2647	3.37285	3.83728
uc007gge.2	Eef2	chr10	80639375	80645254	14.939	15.2042	15.6366	15.8099	16.1155	15.921	14.6833	14.9223	15.2843	15.1773
uc007ggg.2	Dapk3	chr10	80645751	80654927	2.50953	2.3366	4.07708	2.06539	3.90689	3.19362	2.14923	0.406722	2.63589	2.14923
uc007ggo.1	Atcay	chr10	80667257	80693524	6.1725	5.76286	7.43463	7.66034	7.07682	6.75656	5.21224	5.34924	5.95781	5.78666
uc007ggs.2	Zfr2	chr10	80695907	80714868	-0.882784	0.336596	4.07708	3.28779	2	2.31915	1.14923	0.991685	1.05092	1.78666
uc007ggy.1	Mrpl54	chr10	80727466	80729671	8.82371	9.0231	9.29624	9.38732	10.0848	9.80967	8.86445	8.95362	9.48138	9.25076
uc007ggz.2	Apba3	chr10	80730916	80735992	8.12424	8.34782	8.94744	9.30061	9.61655	9.33038	8.09342	8.43601	8.95179	8.93785
uc007ghf.2	2510012J08Rik	chr10	80783847	80788996	8.81766	9.12123	8.93506	9.3038	9.84862	9.41894	8.99651	9.22211	9.31067	9.2808
uc007ghj.2	Hmg20b	chr10	80808790	80813114	2.50953	2.65852	4.07708	4.65036	3.16992	4.05612	2.14923	2.21408	3.51036	3.22723
uc007gho.1	F630110N24Rik	chr10	80820314	80826780	5.93739	6.44512	8.05436	7.89828	7.65105	7.27335	6.38627	6.37251	7.26038	7.18387
uc007ghr.1	AK201601	chr10	80828598	80828968	0.702178	0.336596	3.66204	3.06539	2.80735	1.73419	2.34187	0.991685	2.85828	2.78666
uc007ghs.1	AK200837	chr10	80828704	80828965	4.02411	4.24349	4.66204	5.18087	5.20945	4.94364	3.29607	3.61618	4.69478	4.40557
uc007ght.1	Fzr1	chr10	80829623	80841115	3.43914	3.14395	3.07708	4.28779	3.70044	3.82165	3.8013	3.21408	4.69478	3.30123
uc007ghu.2	Dohh	chr10	80847172	80851097	8.26187	8.49141	8.67699	8.73782	9.62205	9.27141	8.18893	8.52177	9.22085	8.78343
uc007ghv.2	Dohh	chr10	80847172	80854298	4.07141	3.65852	3.07708	3.80236	4.24793	3.82165	3.55132	2.79904	3.05092	3.06676
uc007ghw.1	2210404O07Rik	chr10	80855808	80857824	2.28714	2.92156	2.07708	0.480432	2.58496	1.31915	2.04231	0.991685	2.63589	1.56426
uc007gif.1	Celf5	chr10	80930251	80936123	2.11722	3.14395	4.07708	3.80236	1.58496	2.73419	2.24876	1.21408	1.63589	1.78666
uc007gig.1	Ncln	chr10	80949203	80959108	9.21722	9.79398	10.781	11.0455	11.4944	11.1605	9.38968	9.66411	10.242	10.1771
uc007gih.2	S1pr4	chr10	80960489	80962882	1.92457	3.65852	2.07708	1.48043	6.04439	5.66493	2.6638	3.36092	4.13839	4.2647
uc007gij.1	Gna15	chr10	80965058	80986970	4.02411	4.50652	2.07708	0.480432	3.70044	2.54154	2.14923	1.99168	3.51036	3.06676
uc007gik.1	Gna11	chr10	80991476	80994759	1.28714	2.3366	3.07708	3.06539	2.32193	1.73419	1.6638	2.40672	2.85828	3.30123
uc007gil.1	Gna11	chr10	80991476	81007791	7.46373	7.74599	9.09944	9.32278	8.9629	9.06062	7.39986	7.69443	8.2941	8.18387
uc007giy.2	Sirt6	chr10	81084530	81090353	3.60907	4.03704	3.66204	3.48043	4.32193	3.82165	3.86543	4.47281	3.85828	4.65173
uc007giz.2	Sirt6	chr10	81084530	81090067	3.57665	3.79603	3.66204	3.80236	3.80735	4.19362	3.62727	3.05058	4.05092	3.62316
uc007gjb.1	Ankrd24	chr10	81096443	81106638	0.924571	2.65852	2.07708	0.480432	2.58496	1.31915	2.6638	2.10716	2.63589	1.78666
uc007gjd.1	Ankrd24	chr10	81103636	81108712	3.47477	2.65852	3.66204	4.38732	3.16992	3.05612	3.62727	4.10716	3.22085	3.56426
uc007gjn.1	Mif1	chr10	81816999	81863591	0.439144	1.92156	3.07708	2.48043	1.58496	2.31915	1.6638	1.21408	3.22085	1.30123
uc007gjs.1	Glt8d2	chr10	82113177	82153395	2.02411	1.3366	2.07708	0.480432	2	3.05612	2.5118	2.31361	2.05092	2.56426
uc007gjt.1	Hcfc2	chr10	82161751	82204137	4.50953	4.14395	5.399	5.97228	3.58496	3.31915	4.69942	4.23961	4.22085	3.83728
uc007gjv.1	Nfyb	chr10	82211444	82226886	5.64078	5.42406	2.07708	3.28779	4.9542	4.31915	6.5168	5.68285	5.44324	5.22723
uc007gjw.1	Nfyb	chr10	82212031	82226886	4.78964	4.24349	5.399	5.60971	4.90689	5.16045	5.73419	5.62589	5.77884	5.70722
uc007gjy.1	Txnrd1	chr10	82296695	82360469	3.36514	3.3366	3.07708	2.06539	3.16992	3.31915	2.92683	2.86615	2.05092	3.06676
uc007gkb.1	Txnrd1	chr10	82323085	82360469	1.70218	2.65852	3.07708	4.06539	3.45943	3.19362	2.6638	3.16161	2.63589	2.88619
uc007gkc.1	Eid3	chr10	82329370	82330674	3.2465	3.79603	4.399	2.80236	2.32193	1.73419	4.27261	4.16161	2.85828	3.43873
uc007gkf.1	Slc41a2	chr10	82693883	82800562	5.12844	5.19458	7.69179	7.91506	4.70044	5.12651	4.42933	3.96131	4.05092	4.47115
uc007gkg.2	D10Wsu102e	chr10	82822965	82831580	9.76512	9.52395	8.90997	8.52483	8.75489	8.79488	9.79308	9.81611	9.06215	9.28764
uc007gkh.2	Aldh1l2	chr10	82950191	82996885	1.81766	2.3366	5.53651	5.33841	0	0.734188	2.34187	3.69212	2.05092	1.9793
uc007gkk.1	Appl2	chr10	83062778	83111409	7.05385	6.81233	7.399	7.49166	5.93074	6.50237	7.12651	7.25535	6.33633	6.54154
uc007gkm.2	1500009L16Rik	chr10	83185609	83225507	8.00596	7.94393	6.16454	7.27485	6.49185	6.40661	7.49922	7.38686	7.75136	7.80267
uc007gko.1	Nuak1	chr10	83834063	83903216	7.24134	7.60338	4.399	4.38732	7.63662	7.71147	6.90029	6.91055	6.3547	5.99053
uc007gkq.1	Ckap4	chr10	83989049	83996633	10.3024	10.3755	9.23695	9.25192	10.9337	10.7868	10.368	10.4929	10.5032	10.4866
uc007gks.1	Tcp11l2	chr10	84039691	84077100	3.8721	3.50652	3.66204	3.80236	3.80735	4.19362	3.83372	3.45112	3.85828	3.62316
uc007gku.1	Polr3b	chr10	84085181	84189923	9.15408	9.13426	7.03127	7.24862	7.44294	7.80565	9.06382	9.09497	8.57056	8.78987
uc007gkv.1	Rfx4	chr10	84218792	84369283	-0.882784	0.336596	8.48647	8.49166	3.58496	2.54154	-0.0731664	-1.59328	2.05092	0.564264
uc007gla.2	Fhl4	chr10	84559763	84565240	3.07141	3.50652	3.07708	4.38732	2.58496	2.90411	3.34187	3.36092	2.37285	3.73419
uc007glb.2	AI597468	chr10	84565371	84580492	7.53296	7.65852	6.88443	6.70925	6.10852	6.31915	7.5168	7.00664	6.80581	6.92182
uc007gld.2	Mterfd3	chr10	84582177	84590772	4.20468	3.50652	4.399	4.87275	2.32193	1.73419	3.19985	3.16161	3.95781	2.9793
uc007gle.1	Cry1	chr10	84594444	84647799	9.65249	9.67867	8.05436	8.33218	8.36632	8.58281	9.48462	9.41375	9.2941	9.36624
uc007glg.2	Btbd11	chr10	84849558	85123037	5.83146	6.14395	5.66204	5.60971	7.03342	6.66493	5.69942	5.95362	6.66563	6.23669
uc007gnd.2	Pwp1	chr10	85334575	85351848	9.64908	9.43726	7.66204	7.57846	8.78136	8.74821	9.74967	9.68401	9.17763	9.32913
uc007gng.1	Prdm4	chr10	85369591	85379887	2.9752	3.3366	2.07708	1.48043	2.32193	0.734188	2.8013	2.86615	2.63589	1.9793
uc007gni.1	D10Wsu52e	chr10	85401381	85420538	11.3077	11.2629	10.9628	11.2278	11.8277	11.8567	11.5322	11.5729	11.781	11.663
uc007gnk.1	Fbxo7	chr10	85484673	85511073	1.92457	3.50652	2.07708	3.48043	3	2.54154	2.14923	2.99168	2.63589	2.88619
uc007gnr.1	Timp3	chr10	85763156	85812250	8.13542	8.06452	7.399	7.80236	8.53138	8.79218	7.32771	6.8865	6.95781	7.22723
uc007gqi.1	Hsp90b1	chr10	86153585	86168189	9.42271	8.89884	9.59278	9.44043	8.41785	8.64108	8.40661	8.38257	8.2555	8.61048
uc007gqn.1	Nt5dc3	chr10	86241749	86301134	1.43914	2.3366	4.07708	4.18087	3	2.90411	1.14923	1.99168	2.37285	2.67974
uc007grd.1	4930547N16Rik	chr10	87554142	87609686	7.13681	6.52642	6.07708	6.06539	6.2854	6.51555	6.86935	6.85381	5.80581	6.38869
uc007grr.2	Chpt1	chr10	87936220	87966715	1.43914	2.3366	4.399	3.06539	1	1.31915	2.73419	2.31361	2.05092	1.9793
uc007grs.2	Chpt1	chr10	87949808	87966715	3.9752	3.92156	2.07708	1.48043	3.45943	3.31915	4.36424	4.40672	4.37285	3.14923
uc007grw.1	Arl1	chr10	88194158	88205947	8.45037	8.45554	7.72093	7.96425	7.59991	7.71147	8.78689	8.49153	8.01671	8.2033
uc007grx.2	Utp20	chr10	88209351	88289559	10.2774	9.83843	8.12147	8.34462	8.08215	8.71147	9.96026	10.0537	9.5083	9.99472
uc007gsp.1	Scyl2	chr10	89130169	89149030	2.81766	2.65852	2.07708	0.480432	1.58496	2.54154	1.14923	2.21408	2.85828	2.56426
uc007gss.1	Actr6	chr10	89174717	89195040	5.86541	5.38099	5.53651	5.00399	4	4.25775	5.49162	5.384	5.09532	5.43873
uc007gst.1	AK036535	chr10	89199517	89203938	0.702178	2.65852	2.07708	0.480432	2.58496	1.31915	2.24876	1.40672	2.37285	1.30123
uc007gtl.1	Ikbip	chr10	90545783	90561403	5.40262	5.14395	6.60064	6.33841	3.90689	3.90411	5.16205	4.07915	3.95781	4.43873
uc007gtm.1	Ikbip	chr10	90545783	90565358	3.40262	2.92156	4.399	4.06539	1.58496	1.73419	1.14923	1.21408	1.63589	1.56426
uc007gtn.1	Slc25a3	chr10	90579322	90586708	11.909	11.7455	10.8682	10.9429	11.917	11.8505	12.1947	12.0968	12.0615	12.1728
uc007gto.1	Slc25a3	chr10	90582519	90586708	8.04647	7.89118	6.83196	7.33841	8.10852	7.80565	8.42402	8.37683	8.19558	8.08783
uc007gtp.1	Tmpo	chr10	90610315	90633207	3.78964	2.65852	5.07708	2.80236	4.16993	4.37804	4.0143	4.16161	3.75136	3.88619
uc007gtu.1	Tmpo	chr10	90619843	90634327	5.46594	5.19458	3.66204	4.06539	3.70044	4.90411	5.26073	5.384	4.63589	4.73419
uc007gtw.1	Tmpo	chr10	90623163	90634327	3.11722	2.65852	4.07708	2.06539	2.32193	2.31915	3.34187	3.2647	2.63589	3.06676
uc007gtx.1	Tmpo	chr10	90627676	90634327	4.45707	3.79603	4.66204	4.18087	4.52356	4.37804	4.98573	4.57665	4.57449	4.70722
uc007gud.2	Nedd1	chr10	92147489	92185163	4.96271	4.3366	4.88443	5.52483	4.16993	4.43463	4.88103	4.53601	3.95781	4.67974
uc007gul.2	Cdk17	chr10	92623620	92704087	7.20997	7.48634	7.50334	6.97228	5.32193	5.28878	7.96392	7.34336	6.47719	6.7672
uc007gur.1	Lta4h	chr10	92916140	92947641	9.69464	9.37825	8.79132	9.12429	9.11114	9.00097	9.8282	9.86256	9.59396	9.50873
uc007gus.1	Hal	chr10	92951512	92979488	6.70593	6.71164	2.07708	0.480432	5.88264	6.09174	8.68172	8.75545	8.47299	8.60501
uc007gut.2	Amdhd1	chr10	92986082	93002778	2.64078	3.92156	2.07708	0.480432	2.32193	1.31915	3.8013	3.76427	2.05092	3.37162
uc007guw.2	Snrpf	chr10	93045773	93052403	9.96545	9.82041	9.4434	9.62509	9.69174	9.72429	9.8171	10.0242	9.78394	9.67887
uc007gux.2	Ntn4	chr10	93103793	93208717	4.02411	3.65852	8.38086	8.65036	4.45943	4.82165	2.42933	2.49418	3.75136	3.22723
uc007gvb.1	AK041893	chr10	93318911	93322955	5.28714	5.24349	3.66204	2.80236	4.08746	4.48908	5.76814	5.39541	4.29885	4.86194
uc007gvc.1	Metap2	chr10	93321234	93326815	2.70218	3.65852	3.66204	2.80236	3.58496	4.05612	2.5898	2.79904	3.05092	3.78666
uc007gvh.1	Vezt	chr10	93430844	93498493	5.16161	4.98045	5.77752	5.93986	6.08746	5.96301	5.39715	4.97658	5.44324	5.12905
uc007gvl.1	Vezt	chr10	93464543	93498493	2.76107	2.3366	3.66204	2.80236	3.58496	3.73419	4.22451	2.79904	3.51036	3.9335
uc007gvn.1	AK029258	chr10	93610697	93613835	3.40262	3.50652	3.66204	3.65036	4.75489	4.43463	3.42933	2.79904	3.51036	4.37162
uc007gvq.1	Ndufa12	chr10	93661753	93683693	10.0916	10.2922	11.0429	10.76	10.0389	10.1615	9.91883	10.0488	10.1956	9.9004
uc007gvv.2	4932415G12Rik	chr10	94136237	94151358	1.57665	0.336596	3.07708	3.06539	4.75489	4.48908	2.14923	2.72865	3.95781	4.10858
uc007gvw.1	Ccdc41	chr10	94151534	94205436	2.70218	3.14395	2.07708	2.48043	2	1.31915	3.14923	2.10716	1.63589	2.56426
uc007gvz.2	Plxnc1	chr10	94253611	94407212	3.60907	3.50652	6.60064	5.83798	3.58496	4.43463	2.98573	2.40672	3.22085	3.43873
uc007gwb.1	Cradd	chr10	94637379	94786321	2.50953	3.14395	3.07708	1.48043	1.58496	2.54154	1.34187	2.49418	2.37285	1.56426
uc007gwd.1	Cradd	chr10	94773529	94786767	0.117216	0.336596	2.07708	0.480432	2	1.73419	2.34187	1.40672	2.37285	2.88619
uc007gwe.1	AK087886	chr10	94780880	94786992	1.28714	2.65852	2.07708	1.48043	2.58496	1.31915	0.926834	0.406722	2.05092	2.43873
uc007gwf.2	Socs2	chr10	94847995	94875743	5.8721	5.46588	2.07708	0.480432	4.58496	4.64108	6.08334	5.96131	6.0282	5.81219
uc007gwg.2	Socs2	chr10	94874123	94879491	3.16161	3.14395	2.07708	0.480432	3	2.54154	2.8013	3.10716	4.05092	2.88619
uc007gwl.1	Mrpl42	chr10	94953310	94964572	5.28714	5.09148	4.07708	3.28779	4	3.90411	6.3475	5.87433	4.90891	5.08783
uc007gwp.2	Nudt4	chr10	95009640	95026801	10.5604	10.4594	10.262	10.1687	9.44294	9.53832	10.7158	10.6292	9.86471	10.1144
uc007gwv.1	Eea1	chr10	95403296	95508152	1.70218	2.65852	5.77752	4.56789	2.32193	2.90411	2.42933	0.991685	3.75136	3.06676
uc007gww.2	Btg1	chr10	96079634	96085445	9.11369	8.96231	9.14317	9.2453	8.40514	8.42768	8.30477	8.12611	8.11701	8.21292
uc007gxf.2	Atp2b1	chr10	98377785	98488777	6.13402	5.69415	7.56893	7.99613	6.06609	6.72287	6.03536	5.37251	5.90891	6.35434
uc007gxj.2	Galnt4	chr10	98570768	98575881	5.70218	5.42406	7.63167	7.43463	5.88264	6.00098	6.31341	6.31961	5.60551	5.96799
uc007gxk.2	Dusp6	chr10	98725864	98730123	11.3492	11.615	12.8973	12.9218	10.9737	10.8858	10.4808	10.2844	10.1956	10.1954
uc007gxt.2	Tmtc3	chr10	99906535	99949981	5.6718	5.46588	6.325	5.97228	4.16993	4.19362	5.41869	4.78176	4.63589	5.28308
uc007gxx.2	4930430F08Rik	chr10	100034907	100051893	2.57665	2.3366	4.399	2.48043	3.16992	3.19362	2.24876	2.21408	1.63589	2.56426
uc007gyf.1	Rassf9	chr10	101974855	102009194	2.70218	2.65852	2.07708	0.480432	5.42626	5.43463	1.34187	0.991685	3.85828	3.73419
uc007gyg.1	Alx1	chr10	102470480	102491411	2.64078	2.65852	2.07708	0.480432	3.32193	2.05612	2.14923	1.72865	0.0509239	1.30123
uc007gyp.1	Ccdc59	chr10	105278534	105284566	7.76107	7.67645	7.56893	7.01959	6.98868	6.90411	7.72558	7.77741	7.37285	6.99611
uc007gzn.1	E2f7	chr10	110182520	110193693	3.02411	3.65852	4.07708	2.06539	3	3.54154	4.42933	4.42909	3.75136	3.22723
uc007gzs.2	Csrp2	chr10	110357231	110376570	11.1316	11.0344	6.98397	7.08034	10.5981	10.6176	10.7513	10.8327	10.8298	10.6375
uc007gzt.2	mKIAA0946	chr10	110378835	110387739	2.11722	3.50652	4.66204	4.38732	3.90689	3.43463	2.73419	2.31361	2.05092	1.9793
uc007hab.2	Nap1l1	chr10	110910247	110932255	2.02411	2.65852	2.07708	0.480432	2.80735	2.73419	4.0143	2.86615	3.05092	2.30123
uc007hae.2	Nap1l1	chr10	110917672	110935206	3.6718	4.58452	3.66204	2.48043	2.58496	2.05612	4.14923	4.28937	3.51036	3.22723
uc007haf.2	Phlda1	chr10	110943341	110945705	5.9752	6.622	7.88443	7.95617	6	5.66493	5.19985	4.84967	5.54278	4.70722
uc007hah.2	Krr1	chr10	111409750	111413571	3.50953	4.79603	3.66204	3.80236	4.70044	4.94364	5.13629	4.81611	5.09532	4.70722
uc007haj.2	Glipr1	chr10	111422503	111434320	3.32667	3.3366	2.07708	0.480432	3.32193	3.31915	2.5898	2.31361	3.63589	2.9793
uc007has.1	Atxn7l3b	chr10	112362483	112366082	9.5377	9.32244	10.9131	10.9753	10.3848	10.3378	9.61858	9.43394	9.67298	9.76312
uc007hax.2	Tbc1d15	chr10	114634926	114688549	5.99373	6.35896	4.66204	4.28779	4.08746	3.90411	5.79308	5.57665	4.63589	5.33685
uc007haz.1	Rab21	chr10	114726917	114752647	8.06996	8.09815	8.28653	7.71884	7.89482	7.57339	7.56346	7.37251	7.30831	7.21292
uc007hbg.1	Zfc3h1	chr10	114822014	114869827	5.9752	5.89118	7.16454	6.38732	5.35755	5.09174	5.27261	5.27709	5.66563	5.81219
uc007hbi.1	Lgr5	chr10	114887369	115024836	2.11722	2.65852	3.66204	3.80236	2	2.05612	2.14923	2.31361	3.22085	2.78666
uc007hbw.1	Kcnmb4	chr10	115854923	115910579	0.702178	2.3366	7.43463	7.99613	1	0.734188	0.341871	0.72865	0.0509239	1.30123
uc007hcg.1	AK144843	chr10	116111646	116116359	2.28714	3.3366	2.07708	0.480432	2.32193	1.73419	4.29607	3.76427	4.57449	4.59401
uc007hcn.1	AK016788	chr10	116387622	116400335	4.13958	4.14395	4.07708	4.06539	3.80735	3.43463	2.34187	2.40672	2.05092	1.9793
uc007hcq.1	AK145303	chr10	116480801	116482157	2.36514	2.3366	2.07708	0.480432	2.32193	-0.265812	2.34187	1.99168	2.63589	2.30123
uc007hcs.1	Cct2	chr10	116488053	116500870	13.3743	13.2738	11.5987	11.7513	12.6649	12.759	13.4173	13.377	13.0017	13.0343
uc007hct.1	Frs2	chr10	116507182	116585530	8.02561	8.08479	7.399	7.16693	6.12928	6.64108	7.98212	7.75102	7.36381	7.54154
uc007hcu.1	Frs2	chr10	116519860	116585530	3.50953	3.50652	3.07708	4.48043	3.90689	3.82165	3.69942	3.21408	4.13839	3.30123
uc007hdd.2	Cpsf6	chr10	116781723	116814029	6.76827	7.25546	7.20636	6.06539	6.10852	5.90411	7.62496	6.73764	6.49387	6.84967
uc007hdg.2	Cpsf6	chr10	116790860	116814029	3.47477	3.3366	3.07708	3.06539	1.58496	2.90411	4.24876	3.45112	2.05092	3.06676
uc007hdn.1	Slc35e3	chr10	117170733	117183414	7.9326	7.82041	7.63167	7.91506	7.56224	7.44155	8.0143	7.84759	7.59782	7.76394
uc007hdr.1	Rap1b	chr10	117251652	117283030	9.02185	9.10809	8.66204	8.37525	8.40088	8.23801	9.81151	9.52566	8.67663	8.89518
uc007hea.1	Dyrk2	chr10	118296404	118305959	5.58482	5.69415	5.88443	5.65036	7.31288	7.20992	6.20606	6.49418	6.39077	6.65878
uc007hec.2	Cand1	chr10	118635867	118677111	11.7117	11.5521	10.1645	10.2667	10.6564	10.7962	12.0018	11.9788	11.3604	11.6357
uc007hes.2	Helb	chr10	119520663	119550021	8.76377	8.71164	4.66204	4.93986	6.42626	6.9141	8.74595	8.69212	7.89641	8.03187
uc007hev.1	AK163103	chr10	119638667	119640271	3.28714	3.50652	2.07708	1.48043	5.08746	5.16045	2.5118	3.16161	4.29885	3.78666
uc007hfa.1	Llph	chr10	119664115	119669126	8.19002	8.11138	7.07708	7.49166	7.75489	7.65305	7.87909	7.9342	7.8711	7.96229
uc007hfh.2	Msrb3	chr10	120218156	120336027	5.99373	6.19458	5.247	5.28779	6.12928	6.14358	4.49162	4.57665	5.05092	5.16913
uc007hfn.1	Gns	chr10	120802145	120809306	3.20468	3.50652	3.66204	3.48043	2.32193	2.05612	2.86543	2.86615	2.37285	2.14923
uc007hfq.1	AK081796	chr10	120802150	120805334	4.76107	3.79603	4.88443	4.06539	3.90689	4.48908	3.98573	3.99168	4.13839	4.10858
uc007hfs.1	Rassf3	chr10	120847406	120913306	9.09091	9.06791	10.247	10.3149	8.51175	8.47566	8.43859	8.42492	8.33633	8.16665
uc007hfv.1	Xpot	chr10	121024435	121063372	11.227	11.0814	9.58487	9.79331	10.5294	10.7531	11.7196	11.6471	11.0974	11.3319
uc007hfz.1	AK162911	chr10	121177003	121179617	3.20468	4.03704	3.07708	2.06539	3.90689	4.05612	4.38627	4.2647	4.13839	3.22723
uc007hge.1	Avpr1a	chr10	121885554	121890509	1.43914	2.92156	3.07708	2.48043	2.32193	2.05612	0.663799	-1.59328	1.63589	1.9793
uc007hgh.2	Ppm1h	chr10	122115817	122382849	5.48354	5.38099	4.66204	5.18087	5.24793	4.77858	3.8013	4.16161	4.13839	3.62316
uc007hhd.2	Lrig3	chr10	125403274	125452415	6.45707	6.29079	5.98397	5.38732	6	6.03797	5.6906	5.91452	5.44324	5.43873
uc007hhf.2	Xrcc6bp1	chr10	126305483	126338427	2.28714	3.65852	3.07708	0.480432	1	2.05612	2.5898	3.2647	2.63589	2.30123
uc007hhg.2	Xrcc6bp1	chr10	126324303	126338427	5.62501	5.79603	5.07708	5.18087	5	4.37804	5.9785	6.10021	5.54278	5.65173
uc007hhh.2	Xrcc6bp1	chr10	126325025	126338427	4.54348	3.3366	3.66204	3.48043	3.80735	4.05612	4.09676	4.86615	3.37285	3.88619
uc007hhi.1	AK087024	chr10	126395078	126398053	0.702178	1.92156	2.07708	0.480432	2.32193	1.73419	1.5118	1.86615	2.37285	1.9793
uc007hhl.2	Avil	chr10	126437764	126458050	1.81766	2.3366	3.07708	2.06539	3.16992	3.31915	2.5118	2.40672	3.51036	3.73419
uc007hhm.1	Tsfm	chr10	126459387	126467870	6.88871	6.99481	6.98397	6.45771	7.96	7.59837	7.46599	7.45112	7.53474	7.87412
uc007hhn.1	Tsfm	chr10	126461290	126467870	3.36514	1.3366	3.66204	1.48043	3	3.54154	3.5898	3.45112	3.63589	2.88619
uc007hho.1	Tsfm	chr10	126466277	126467870	2.20468	1.3366	2.07708	1.48043	2.32193	2.05612	3.04231	2.49418	2.63589	2.43873
uc007hhp.1	Mettl1	chr10	126478987	126481058	3.70218	3.65852	4.399	2.48043	4	2.54154	3.83372	4.28937	3.37285	3.88619
uc007hhu.1	2016-03-09	chr10	126493105	126497240	6.75746	6.95131	6.88443	6.87275	7.53916	7.4689	6.09676	6.71506	6.88381	6.84967
uc007hhv.2	Cdk4	chr10	126500658	126504338	12.837	13.0279	13.0465	13.2577	13.2448	13.1783	12.7294	12.8635	13.2417	13.1168
uc007hhw.1	Tspan31	chr10	126504345	126507317	9.99028	9.90455	11.3462	11.4397	10.444	10.4066	10.0736	10.0411	10.2246	10.1366
uc007hil.1	Dtx3	chr10	126627433	126632765	3.73193	3.79603	3.66204	4.72836	4.32193	3.64108	3.5118	3.89858	3.85828	3.73419
uc007hip.1	AK077682	chr10	126632304	126639699	0.702178	0.336596	3.07708	0.480432	2.80735	3.54154	2.14923	1.40672	2.37285	1.9793
uc007hiq.2	Pip4k2c	chr10	126634122	126648678	8.97753	8.77539	7.399	7.59937	8.75822	8.68256	8.37254	8.56659	8.82241	8.75244
uc007hir.2	Pip4k2c	chr10	126641406	126648678	3.02411	2.65852	2.07708	0.480432	1.58496	2.54154	3.55132	3.45112	3.51036	3.73419
uc007his.2	Kif5a	chr10	126662750	126700419	4.62501	4.14395	2.07708	2.80236	3	3.43463	4.06979	4.33746	3.75136	3.88619
uc007hit.2	Kif5a	chr10	126666105	126700419	2.11722	2.65852	2.07708	1.48043	2	2.31915	-0.658129	1.99168	1.05092	1.78666
uc007hiy.2	Ddit3	chr10	126727848	126733344	5.36514	6.24349	4.88443	5.93986	5	5.28878	4.62727	4.83299	5.13839	5.40557
uc007hjf.1	Gli1	chr10	126766937	126778635	8.29588	8.74174	3.07708	1.48043	6.85798	6.82165	5.82569	5.79043	4.95781	5.43873
uc007hjt.1	Ndufa4l2	chr10	126951994	126954210	2.64078	3.14395	2.07708	1.48043	4.75489	7.16882	-1.65813	-0.00831527	2.37285	3.30123
uc007hjw.1	Nxph4	chr10	126962528	126971615	2.02411	2.65852	2.07708	0.480432	3.58496	3.43463	0.341871	0.72865	2.85828	1.56426
uc007hjx.1	Lrp1	chr10	126975213	127058204	8.42783	8.99123	10.0019	9.946	11.3208	10.8903	7.82569	7.94782	8.92437	8.74583
uc007hjz.1	Lrp1	chr10	127026212	127058204	1.43914	1.3366	3.07708	1.48043	2.80735	2.05612	0.663799	0.72865	2.63589	0.979301
uc007hka.1	Stat6	chr10	127080041	127098043	8.50631	8.41875	5.247	5.06539	6.89482	7.218	8.503	8.50344	8.50214	8.55862
uc007hkf.2	Tmem194	chr10	127114120	127132222	3.02411	2.3366	3.07708	2.80236	2.80735	3.19362	1.5118	2.65465	3.37285	2.9793
uc007hkh.2	Myo1a	chr10	127142311	127157996	3.47477	4.42406	3.07708	1.48043	1.58496	2.05612	3.34187	3.45112	4.05092	4.50286
uc007hkl.1	Zbtb39	chr10	127176593	127184395	7.68897	7.96595	8.03127	8.01181	8.38802	8.37805	7.82367	8.03426	8.06215	8.12141
uc007hla.1	Prim1	chr10	127452270	127467086	7.38166	6.90645	6.16454	6.36307	5.64386	5.90411	7.19985	7.08268	6.85828	6.74749
uc007hlc.2	Naca	chr10	127472401	127485693	4.28714	5.14395	4.88443	5.18087	4.45943	4.59217	4.89646	5.16161	4.22085	4.2647
uc007hld.1	Ptges3	chr10	127496037	127514310	12.5238	12.3544	10.4949	10.2651	11.2831	11.2816	12.9357	12.5645	11.8506	12.1086
uc007hle.1	Atp5b	chr10	127520362	127527444	14.829	14.8095	14.662	14.8322	14.9268	14.856	14.613	14.7447	14.9749	14.9038
uc007hlf.1	TIP5	chr10	127528665	127549205	2.11722	3.3366	3.07708	2.06539	2	2.73419	2.8013	3.10716	3.95781	3.30123
uc007hlj.1	Baz2a	chr10	127529515	127566359	5.19403	4.65852	5.247	3.28779	4.24793	4.54154	5.27261	5.36092	4.85828	4.95658
uc007hlm.1	Rbms2	chr10	127566525	127613624	3.11722	2.65852	3.66204	3.28779	1.58496	1.73419	3.24876	3.45112	3.37285	1.56426
uc007hln.1	Rbms2	chr10	127566525	127617353	2.11722	1.3366	3.07708	2.80236	1	3.19362	2.5118	3.61618	2.05092	2.88619
uc007hlq.1	Spryd4	chr10	127646965	127648850	8.76377	8.83245	7.83196	7.76583	8.60363	8.54476	9.14842	9.16744	9.51649	9.35868
uc007hlr.1	Mip	chr10	127662893	127668867	3.99986	4.50652	2.07708	0.480432	2.58496	2.05612	4.12323	4.47281	4.63589	3.83728
uc007hls.1	AK140919	chr10	127667645	127669846	4.0945	4.3366	3.07708	3.93986	3	3.64108	4.34187	4.16161	4.37285	4.06676
uc007hlz.1	Apof	chr10	127705052	127707207	2.20468	2.65852	2.07708	1.48043	1	1.73419	2.6638	3.10716	2.05092	2.43873
uc007hma.1	Stat2	chr10	127707631	127729905	3.16161	2.92156	4.07708	3.28779	1.58496	2.05612	3.5118	3.10716	3.95781	2.9793
uc007hmc.1	Il23a	chr10	127733195	127735140	4.84514	4.58452	2.07708	0.480432	2.32193	3.05612	4.8176	4.63554	4.69478	4.14923
uc007hmd.1	Usp52	chr10	127740390	127744464	4.73193	4.98045	4.07708	4.48043	4.58496	4.77858	5.36424	5.41795	4.90891	4.65173
uc007hmi.1	Cnpy2	chr10	127759514	127764243	9.1059	9.1375	8.94744	9.2453	9.62205	9.62749	9.49162	9.48287	9.76173	9.70892
uc007hmj.1	Cs	chr10	127774887	127799535	12.0827	12.0856	12.6695	12.7574	12.4419	12.3454	12.0884	12.2275	12.2342	12.2383
uc007hmk.1	Coq10a	chr10	127800152	127807093	6.083	5.622	7.63167	7.52483	6.78136	6.74542	6.08334	6.34924	6.70914	6.45503
uc007hml.1	Ankrd52	chr10	127814179	127822552	3.95011	4.14395	4.66204	4.28779	3.70044	3.90411	4.38627	4.21408	4.44324	3.9335
uc007hmm.1	Ankrd52	chr10	127814179	127831062	6.73927	7.16949	9.05436	9.34152	9.55459	8.9702	6.57549	6.85793	7.18021	6.89816
uc007hmq.1	Obfc2b	chr10	127838450	127846852	8.55808	8.84042	10.1645	10.1791	9.80413	9.86604	8.24876	8.52955	8.95781	8.7157
uc007hna.1	AK163775	chr10	127912120	127914536	2.92457	3.79603	4.07708	3.48043	1.58496	2.05612	4.29607	3.93028	3.22085	3.06676
uc007hnd.1	Myl6	chr10	127927916	127930881	4.81766	4.86016	4.399	4.80236	5	4.73419	4.94178	5.02143	5.13839	5.31915
uc007hne.1	Myl6b	chr10	127931212	127935741	5.60103	5.76286	6.247	5.9067	5.04439	4.19362	4.60866	5.07915	5.18021	4.91004
uc007hnf.1	AK040027	chr10	127936302	127941298	4.07141	4.92156	3.66204	4.28779	3.45943	3.64108	4.42933	4.40672	4.05092	4.02369
uc007hng.1	Esyt1	chr10	127947305	127962915	7.421	7.76286	6.399	5.65036	8.35755	8.25383	8.08839	8.29089	8.09532	8.09304
uc007hnh.1	Esyt1	chr10	127951933	127962915	2.28714	2.65852	2.07708	2.06539	2.32193	1.31915	3.38627	3.31361	2.05092	2.88619
uc007hni.1	Zc3h10	chr10	127980620	127984800	8.34603	8.57977	8.30589	8.12429	8.73471	8.73137	7.62958	7.81823	8.13307	8.08259
uc007hnj.2	Rpl41	chr10	127985165	127986126	5.28714	3.14395	5.247	5.65036	2.58496	3.98212	3.92683	4.69212	3.22085	3.14923
uc007hnl.1	Pa2g4	chr10	127994821	128002990	12.9727	12.9124	11.2369	11.3006	12.5572	12.5347	12.9716	12.9973	12.7856	12.7489
uc007hnm.1	Erbb3	chr10	128006423	128026557	7.90021	8.00902	2.07708	1.48043	7.35755	7.28108	8.60044	8.84863	7.73742	7.78666
uc007hno.2	Rps26	chr10	128061584	128063562	12.8016	12.8672	12.5878	12.5912	12.2761	12.2895	12.5607	12.7568	12.7317	12.3711
uc007hnt.2	Suox	chr10	128106942	128110974	6.84514	6.79603	7.93506	8.21514	6.84549	6.86347	6.38079	6.44564	6.60551	6.54154
uc007hnv.2	Rab5b	chr10	128114238	128133324	9.09664	9.08143	9.3532	9.50834	8.99718	9.12221	9.22069	9.39043	9.08984	9.01272
uc007hny.2	Cdk2	chr10	128134994	128142107	2.02411	2.3366	3.66204	3.93986	1	2.54154	2.5898	2.65465	2.37285	2.14923
uc007hoa.1	Cdk2	chr10	128134994	128142082	3.92457	3.3366	5.07708	4.80236	3.70044	4.48908	5.09676	5.25221	4.37285	4.43873
uc007hob.1	Pmel	chr10	128143313	128157294	6.892	6.98045	4.07708	3.06539	4.58496	4.68839	6.24876	6.58165	6.46031	6.47115
uc007hoc.1	Dgka	chr10	128157191	128181112	8.62303	8.57022	6.247	6.03502	6.98868	6.55437	7.46081	7.47818	7.71626	7.90708
uc007hod.2	Wibg	chr10	128184934	128203620	3.89858	4.14395	2.07708	1.48043	3.80735	3.98212	4.0143	3.99168	3.75136	3.62316
uc007hoi.1	1110012D08Rik	chr10	128237091	128241426	5.96896	5.86016	9.0883	9.28456	7.17991	7.00098	5.72558	6.07915	6.11701	5.91004
uc007hot.1	Gdf11	chr10	128321601	128328774	4.85868	4.50652	7.20636	7.54652	5.42626	4.86347	4.40796	4.31361	4.22085	4.06676
uc007hoz.1	Bloc1s1	chr10	128356969	128360580	7.53296	7.61272	8.34386	8.6403	7.99435	7.88394	7.74061	7.8076	7.96381	7.79948
uc007hro.1	Pisd-ps1	chr11	3024023	3028893	7.37931	7.16949	6.66204	6.38732	7.34873	7.4689	7.07658	7.19789	7.65825	7.46714
uc007hrp.1	Pisd-ps1	chr11	3024023	3031947	4.02411	2.92156	2.07708	2.06539	2.80735	3.64108	2.6638	3.36092	2.85828	2.88619
uc007hrt.1	Sfi1	chr11	3031852	3093466	2.02411	2.92156	3.07708	0.480432	3.16992	1.73419	0.926834	1.99168	2.85828	1.30123
uc007hrv.1	BC049259	chr11	3031889	3033889	3.32667	3.14395	4.399	2.80236	4.16993	3.82165	3.73419	2.65465	3.05092	2.9793
uc007hry.1	AK050795	chr11	3037139	3039650	2.43914	3.79603	3.07708	3.80236	3.16992	3.19362	2.5898	1.99168	3.22085	3.30123
uc007hrz.1	BC025885	chr11	3048818	3050541	2.92457	2.3366	4.07708	3.06539	1.58496	1.73419	2.98573	2.99168	2.63589	2.56426
uc007hsf.2	Eif4enif1	chr11	3103021	3144591	2.11722	1.3366	3.07708	2.80236	2.58496	1.31915	1.6638	2.31361	2.37285	1.56426
uc007hsh.1	Drg1	chr11	3149924	3166389	10.8736	10.4307	9.36248	9.59678	10.4094	10.4757	10.9179	10.9266	10.747	10.7442
uc007hsi.1	Drg1	chr11	3157732	3166389	3.20468	4.14395	3.66204	3.06539	3.16992	3.90411	3.92683	4.10716	3.95781	3.9335
uc007hsj.1	Patz1	chr11	3188876	3195432	5.73927	6.3366	7.85844	7.93164	7.29462	7.09174	6.16205	6.36672	6.55872	6.54154
uc007hso.1	AK177174	chr11	3208804	3209075	6.61307	5.89118	6.66204	6.23532	6.79442	6.27335	6.78481	6.71506	6.18021	6.44691
uc007hst.1	Limk2	chr11	3243299	3271395	6.11157	6.54605	4.66204	4.93986	5.9542	5.86347	5.26073	5.23961	5.90891	5.79948
uc007hsu.1	Limk2	chr11	3243299	3309238	2.02411	3.14395	3.66204	1.48043	4.39232	3.98212	2.92683	2.72865	3.05092	3.06676
uc007hsx.1	AK018450	chr11	3352474	3358341	3.60907	3.92156	4.399	3.80236	3.16992	3.05612	3.83372	3.57665	3.05092	2.9793
uc007hte.2	Smtn	chr11	3417524	3427940	1.11722	1.92156	4.399	3.65036	2	2.54154	0.926834	1.72865	2.37285	1.9793
uc007htk.1	Tug1	chr11	3539796	3548811	1.11722	2.65852	3.07708	3.48043	2.58496	2.31915	1.14923	1.21408	1.63589	1.30123
uc007htl.1	Tug1	chr11	3543270	3547536	5.15064	5.29079	5.247	4.06539	4.39232	4.25775	5.05612	4.49418	4.22085	4.50286
uc007htm.1	Morc2a	chr11	3549496	3590375	7.46151	7.67645	6.07708	6.31332	6.56986	6.89406	7.69942	7.52826	6.8711	7.2033
uc007htu.2	Dusp18	chr11	3795242	3801299	6.6486	6.52642	7.16454	7.06539	5.39232	5.59217	5.38627	5.13464	5.47719	5.76066
uc007htv.1	Slc35e4	chr11	3807024	3814667	6.76107	7.05084	9.63167	9.78877	9.32868	8.79488	5.68172	6.12097	7.59782	7.24609
uc007hua.1	Pes1	chr11	3863977	3880007	11.9004	11.9183	10.5242	10.6466	11.8673	11.7758	11.8121	11.9321	11.9619	11.9402
uc007hue.1	Sec14l4	chr11	3931784	3948012	4.8721	5.19458	2.07708	0.480432	3	3.43463	4.17476	4.55647	4.05092	4.47115
uc007hug.1	Mtfp1	chr11	3991483	3995434	7.23616	7.54605	6.46939	6.23532	6.94251	6.83222	7.12977	7.46742	6.69478	6.78666
uc007huh.1	Sec14l2	chr11	3997042	4018732	5.71713	6.09148	7.46939	7.55725	4.9542	5.16045	5.72558	5.96896	5.26038	5.22723
uc007huo.2	Sf3a1	chr11	4060356	4071916	3.32667	2.92156	4.399	3.28779	3.32193	3.43463	3.92683	3.40672	3.51036	2.78666
uc007hup.2	Sf3a1	chr11	4060356	4082544	10.8848	11.0073	10.325	10.1617	11.5812	11.474	10.7936	10.9747	10.9136	10.9418
uc007hur.1	Gatsl3	chr11	4118253	4122412	7.93899	8.16315	3.07708	2.48043	9.92481	9.77311	8.0371	8.3091	8.98461	8.99332
uc007huw.1	mKIAA0371	chr11	4380870	4388369	4.2465	4.72891	5.399	5.12429	5.20945	5.16045	4.57069	4.31361	4.22085	4.10858
uc007huy.1	Mtmr3	chr11	4388911	4494818	1.57665	1.92156	2.07708	3.06539	2.32193	2.31915	2.42933	2.21408	3.22085	2.43873
uc007huz.1	Gm11961	chr11	4520277	4527769	0.117216	2.65852	2.07708	1.48043	1	1.73419	1.34187	1.21408	2.05092	0.979301
uc007hvb.1	Uqcr10	chr11	4601970	4604347	10.1664	10.073	10.1269	10.3117	10.1812	10.0584	10.0406	10.3019	10.6518	10.4777
uc007hve.1	Cabp7	chr11	4638823	4646781	3.02411	3.14395	2.07708	0.480432	3	2.90411	3.14923	3.2647	2.85828	3.73419
uc007hvl.1	Thoc5	chr11	4795345	4828868	10.4646	10.4214	8.52002	8.6996	9.70563	9.61836	10.3091	10.3819	10.145	10.0634
uc007hvm.1	Nefh	chr11	4838758	4848067	9.16502	9.07469	2.07708	2.06539	7.91886	7.90911	8.85264	8.73315	8.12239	8.13159
uc007hvs.1	Rasl10a	chr11	4958130	4960386	3.36514	3.92156	2.07708	0.480432	3.32193	2.54154	2.42933	3.10716	3.37285	2.67974
uc007hvz.1	Ewsr1	chr11	4980080	4999080	6.37931	6.54605	6.72093	6.52483	6.02237	6.17713	7.77858	7.37827	6.44324	6.53389
uc007hwa.1	Ewsr1	chr11	4990461	4999080	4.43914	4.3366	3.66204	4.06539	3.32193	3.43463	5.22451	4.63554	3.85828	3.78666
uc007hwh.1	Kremen1	chr11	5091555	5161613	7.55808	7.575	8.45212	8.57846	8.77149	8.58906	7.21224	7.13464	7.65825	7.47516
uc007hwi.1	kremen	chr11	5104836	5138505	2.64078	3.3366	4.07708	2.06539	3.70044	4.43463	2.5898	3.16161	2.63589	2.78666
uc007hwj.2	Znrf3	chr11	5176331	5344850	4.54348	4.58452	4.88443	5.12429	5.08746	4.77858	4.92683	4.91452	4.95781	4.95658
uc007hwk.2	Znrf3	chr11	5178605	5281743	5.16161	5.14395	5.53651	5.48043	5	5.16045	5.14923	4.97658	5.05092	4.9793
uc007hwp.2	Ccdc117	chr11	5428890	5442220	9.55237	9.22534	6.66204	6.56789	8.0607	8.01496	9.32058	9.16328	8.88381	8.96087
uc007hwt.1	Mrps24	chr11	5603985	5607702	8.98989	9.32812	9.46078	9.44043	9.70217	9.62293	9.40459	9.55329	10.0124	9.87563
uc007hwz.1	2210015D19Rik	chr11	5662152	5681879	4.16161	4.92156	5.399	4.80236	2.80735	3.31915	4.5317	4.51525	4.37285	3.43873
uc007hxa.1	2210015D19Rik	chr11	5662152	5684713	3.99986	4.14395	5.98397	6.36307	4.08746	4.48908	4.55132	4.51525	4.57449	4.65173
uc007hxe.2	Pgam2	chr11	5701639	5703799	3.6718	3.92156	2.07708	2.48043	3.32193	3.82165	3.98573	4.33746	5.51036	5.69355
uc007hxf.2	Polm	chr11	5727862	5738019	5.68707	6.14395	6.16454	6.03502	6.82018	6.43463	5.68172	5.60639	5.90891	5.10858
uc007hxk.2	Pold2	chr11	5772182	5778259	9.65928	10.0457	10.6844	10.9337	11.1898	10.9768	10.1216	10.3739	10.617	10.4165
uc007hxl.1	Myl7	chr11	5796639	5798785	3.60907	3.65852	2.07708	0.480432	4.85798	5.40661	3.92683	4.31361	4.63589	4.47115
uc007hxp.2	Ykt6	chr11	5855760	5867783	10.2561	10.2405	10.3485	10.6428	10.6733	10.5836	10.248	10.3765	10.6957	10.5769
uc007hxv.1	BC019819	chr11	5906290	5908331	6.47477	6.79603	7.69179	8.00399	8.04985	7.72854	6.04923	6.18808	6.15945	6.01272
uc007hxw.1	Camk2b	chr11	5911667	5965751	1.81766	1.92156	5.98397	6.68989	1	2.54154	2.86543	3.21408	1.05092	0.979301
uc007hya.2	Nudcd3	chr11	6022927	6100454	3.2465	4.03704	2.07708	2.80236	2.32193	0.734188	3.5118	3.10716	1.05092	2.88619
uc007hyc.1	Ddx56	chr11	6157547	6167732	10.6116	10.5916	10.1539	10.2797	11.5177	11.5057	10.7652	10.9749	11.4129	11.3139
uc007hye.1	Tmed4	chr11	6170716	6174840	8.65346	8.84835	9.97189	10.1315	9.89936	9.88774	8.3091	8.45657	9.05092	9.10213
uc007hyp.2	H2afv	chr11	6327228	6344446	2.81766	1.92156	2.07708	3.65036	3	3.05612	2.92683	3.40672	3.37285	2.88619
uc007hyr.2	EF437385	chr11	6367606	6369177	5.8721	5.50652	7.16454	7.30061	5.67243	6.3489	5.04231	5.09322	5.18021	5.81219
uc007hys.1	Purb	chr11	6374784	6375920	5.91812	5.89118	6.72093	7.01959	6.37504	6.12651	5.57069	5.39541	5.60551	5.94509
uc007hyt.2	Myo1g	chr11	6406550	6420961	6.28714	6.44512	2.07708	1.48043	9.83447	9.60763	6.24876	6.56659	7.61317	7.74085
uc007hyu.1	AK160548	chr11	6425621	6428763	8.6339	8.67645	7.95972	8.30698	9.06609	8.85831	8.88973	9.01405	9.23332	9.05745
uc007hyv.2	Ccm2	chr11	6446889	6496764	4.62501	4.42406	5.07708	5.28779	4.32193	5.12651	3.95658	4.81611	4.37285	3.9793
uc007hyy.1	Nacad	chr11	6497825	6506057	3.60907	2.92156	6.399	6.60971	5.45943	5.19362	2.14923	1.86615	3.51036	2.14923
uc007hza.2	Tbrg4	chr11	6515600	6526070	7.49008	7.72891	6.72093	6.5028	7.72792	7.82695	7.57309	7.78176	7.66563	7.41393
uc007hzf.1	Adcy1	chr11	6963491	7078508	6.94376	7.06452	7.03127	7.52483	7.18982	7.14358	6.16205	6.14143	5.83228	5.89816
uc007hzi.1	Igfbp3	chr11	7106095	7113926	9.17453	9.14717	13.5416	13.7303	10.3652	10.5073	7.76394	7.77086	7.73742	7.55295
uc007hzk.1	Tns3	chr11	8331654	8564538	9.96427	10.2039	7.28653	7.51385	8.13955	8.10488	10.4153	10.5603	10.0453	9.85965
uc007hzl.1	Tns3	chr11	8445695	8564538	5.84514	6.14395	3.07708	4.28779	3.80735	4.98212	7.29607	7.03972	6.37285	6.45503
uc007hzp.1	Hus1	chr11	8893144	8911131	2.8721	3.65852	2.07708	2.80236	2	2.31915	3.34187	3.40672	2.85828	2.67974
uc007hzs.1	Hus1	chr11	8897359	8911140	2.28714	2.92156	4.07708	2.48043	2	-0.265812	3.04231	2.40672	2.37285	3.14923
uc007hzx.2	Upp1	chr11	9018010	9036173	3.50953	2.65852	2.07708	0.480432	0	2.05612	3.34187	2.99168	3.51036	3.06676
uc007hzy.2	Upp1	chr11	9018509	9036173	4.04795	4.14395	2.07708	0.480432	2	2.90411	3.5118	3.76427	3.85828	3.22723
uc007iaa.1	Abca13	chr11	9091944	9584262	2.11722	1.3366	2.07708	1.48043	9.50779	9.53832	3.29607	3.53601	6.60551	7.22723
uc007iav.2	Ddc	chr11	11714103	11722924	2.50953	3.14395	2.07708	0.480432	2.32193	2.31915	2.92683	3.16161	3.05092	1.30123
uc007iay.1	AK006690	chr11	11768125	11785323	3.16161	2.65852	2.07708	1.48043	3.70044	3.19362	4.24876	4.63554	3.05092	3.37162
uc007iba.2	Grb10	chr11	11830501	11937423	4.50953	3.65852	3.66204	3.06539	3.45943	2.31915	4.68172	4.45112	2.63589	2.56426
uc007ibk.2	Vstm2a	chr11	16157726	16184554	3.6718	4.3366	2.07708	1.48043	7.25739	6.71147	2.73419	2.57665	5.09532	4.83728
uc007ibn.1	Egfr	chr11	16652205	16787661	-0.297822	2.3366	4.88443	4.93986	3.32193	3.73419	1.14923	-0.593278	2.63589	1.9793
uc007ibo.1	Egfr	chr11	16652205	16813910	4.91163	5.3366	9.56893	9.22862	6.02237	6.48908	4.0143	3.83299	6.09532	6.25543
uc007ibu.1	Fbxo48	chr11	16851412	16854775	2.92457	2.65852	4.07708	4.28779	2.58496	3.19362	3.62727	3.2647	3.05092	2.88619
uc007iby.1	Cnrip1	chr11	16951936	16979375	1.70218	2.92156	5.66204	5.52483	0	1.31915	0.926834	-0.00831527	0.0509239	2.30123
uc007ica.1	Ppp3r1	chr11	17059300	17100383	4.43914	4.92156	4.07708	4.72836	3.45943	4.25775	4.31915	4.72865	3.63589	4.37162
uc007icc.1	Pno1	chr11	17103202	17111592	9.30395	8.99123	7.28653	6.76583	7.88264	7.73419	9.10176	8.95169	8.48138	8.59585
uc007icd.1	Wdr92	chr11	17111895	17135203	9.06996	8.94022	6.66204	6.56789	7.43463	7.44155	8.89358	8.81505	8.12239	8.44487
uc007ice.1	C1d	chr11	17157620	17169179	7.23616	7.18209	6.72093	6.26179	6.04439	6.28878	7.77858	7.25847	6.81911	6.62316
uc007ich.1	AK019730	chr11	17853972	17855101	1.43914	2.3366	2.07708	2.06539	1	2.05612	2.42933	2.49418	2.85828	2.43873
uc007icq.1	Spred2	chr11	19824444	19919089	2.50953	2.65852	2.07708	2.06539	3	3.64108	3.09676	2.57665	3.22085	2.88619
uc007icr.1	Spred2	chr11	19824444	19922600	6.8854	7.25546	7.07708	7.06539	7.26679	7.27335	7.28439	7.14819	7.2108	6.99053
uc007ict.2	Actr2	chr11	19978688	20012954	3.47477	3.65852	3.07708	3.06539	3.16992	3.82165	3.86543	4.02143	3.51036	3.9335
uc007icv.1	Rab1	chr11	20101604	20126859	9.61507	9.43726	8.48647	8.25522	7.92481	7.88901	9.49732	9.16077	8.42596	8.75902
uc007icw.1	Cep68	chr11	20127039	20149427	7.52873	7.41341	7.83196	7.91506	6.87036	7.15204	8.42933	8.17656	7.73742	7.64464
uc007icz.1	Cep68	chr11	20138389	20149427	5.40262	4.50652	3.66204	4.93986	4.32193	5.19362	5.19985	5.25221	5.54278	5.54916
uc007ida.1	Cep68	chr11	20141525	20149427	1.81766	2.92156	3.66204	3.28779	2	2.54154	1.6638	2.49418	3.51036	2.67974
uc007idb.2	Slc1a4	chr11	20202182	20232716	6.96896	6.92156	9.87149	10.0748	8.73809	8.69419	8.10342	8.07738	8.39522	8.31022
uc007idj.2	1110067D22Rik	chr11	20723357	20731111	6.19936	6.16949	6.98397	6.78421	5.35755	5.92401	6.59926	6.36672	5.44324	5.33685
uc007idk.1	Peli1	chr11	20991326	21043008	0.117216	0.336596	4.07708	2.80236	1	2.05612	0.663799	0.72865	1.05092	1.30123
uc007idm.1	Peli1	chr11	20992120	21049405	2.64078	2.92156	5.247	4.48043	3.70044	3.73419	3.76814	3.10716	3.22085	3.14923
uc007idq.1	AK162774	chr11	21141342	21145241	3.36514	2.92156	4.399	3.48043	0	2.31915	3.42933	3.21408	2.63589	2.30123
uc007ids.2	Ugp2	chr11	21221144	21270882	3.07141	2.3366	5.77752	5.65036	2.32193	0.734188	2.24876	3.40672	1.05092	2.67974
uc007idv.2	Mdh1	chr11	21456694	21471937	11.1132	10.9786	10.9131	10.9862	10.1737	10.2926	10.7347	10.6283	10.7278	10.8015
uc007iee.1	Tmem17	chr11	22412285	22419234	5.77543	5.58452	5.399	3.48043	5.58496	5.96301	6.60397	6.30759	6.31771	6.12905
uc007ieh.2	B3gnt2	chr11	22734738	22759735	2.36514	4.03704	3.66204	1.48043	3.90689	4.25775	2.73419	2.93028	3.63589	3.30123
uc007iek.1	Commd1	chr11	22799727	22878996	2.50953	2.65852	3.66204	2.48043	0	1.31915	1.8013	0.991685	2.63589	1.9793
uc007iel.1	Commd1	chr11	22799727	22882284	5.43914	3.92156	4.88443	5.06539	4	5.31915	5.22451	5.63554	5.33633	5.00167
uc007iem.1	Zrsr1	chr11	22872028	22874908	6.93739	6.98045	5.98397	5.80236	5.61471	5.77858	6.80948	6.74657	6.68028	6.94509
uc007ien.1	Cct4	chr11	22890592	22899876	3.84514	4.42406	4.07708	3.65036	4.90689	4.54154	4.98573	5.00664	4.95781	4.73419
uc007ieo.1	Cct4	chr11	22890592	22903336	10.3761	9.89693	8.79132	8.85981	8.97728	8.96781	10.2318	10.2076	9.51036	9.98212
uc007iet.1	Xpo1	chr11	23156040	23197597	10.2912	9.71814	9.00781	9.04267	8.41785	9.12865	10.4326	10.1291	9.52666	9.69783
uc007ieu.2	Usp34	chr11	23206894	23390560	6.55601	6.48634	7.399	6.82028	5.32193	5.73419	6.40257	6.56659	6.66563	6.55673
uc007iez.1	mKIAA0570	chr11	23346743	23356686	4.22574	4.03704	3.66204	3.93986	4.32193	3.98212	5.29607	3.86615	4.29885	4.78666
uc007ifj.1	Pex13	chr11	23546478	23565935	7.5746	7.43463	7.20636	6.98823	6.10852	6.73419	7.66605	7.38686	7.09532	7.36732
uc007ifs.2	Bcl11a	chr11	23978055	23990906	2.36514	3.14395	3.07708	3.28779	0	1.73419	0.341871	1.57665	0.0509239	2.67974
uc007igj.1	Gapdh	chr11	26685107	26687859	7.46373	10.3182	9.91628	9.37222	11.1261	10.6716	8.26668	8.53214	10.414	10.6654
uc007ign.2	Efemp1	chr11	28753204	28826743	4.98758	4.86016	2.07708	2.06539	4.52356	5.28878	4.97123	4.40672	3.85828	4.78666
uc007igs.2	Smek2	chr11	29072906	29120797	4.76107	4.92156	5.66204	4.93986	3	4.59217	4.75126	4.23961	4.22085	4.56426
uc007igu.1	Ccdc104	chr11	29121535	29147272	6.35084	6.09148	7.43463	7.27485	5.42626	5.46211	6.05612	5.99918	4.95781	5.33685
uc007igw.1	Ccdc88a	chr11	29273774	29410811	2.92457	1.92156	5.53651	4.87275	1.58496	2.31915	2.86543	2.49418	2.85828	1.78666
uc007igx.1	Ccdc88a	chr11	29356457	29362261	0.924571	1.3366	3.66204	3.48043	1.58496	1.73419	1.92683	0.991685	2.05092	1.30123
uc007ihb.1	AK051928	chr11	29426412	29428524	3.57665	4.14395	4.399	2.06539	3.58496	3.82165	3.83372	3.93028	3.75136	4.22723
uc007ihf.1	Mtif2	chr11	29439970	29442018	1.92457	2.3366	4.07708	2.80236	0	0.734188	3.04231	3.16161	2.37285	1.9793
uc007ihq.1	Eml6	chr11	29643050	29926033	2.36514	1.92156	4.399	3.80236	2	2.73419	2.34187	2.31361	2.63589	1.78666
uc007ihr.1	4931440F15Rik	chr11	29722394	29725668	0.924571	2.92156	2.07708	0.480432	2.58496	2.90411	0.663799	2.10716	1.05092	1.78666
uc007ihs.1	Spnb2	chr11	29999394	30119772	7.31689	7.11796	7.46939	7.41117	5.55459	6.24198	7.09676	6.79474	6.80581	7.09824
uc007ihu.1	AK137356	chr11	30116661	30168175	1.11722	0.336596	3.66204	3.65036	2.32193	1.73419	-0.0731664	-0.00831527	0.0509239	1.78666
uc007ihw.1	Acyp2	chr11	30405991	30549396	3.60907	3.3366	4.88443	4.28779	2.58496	2.73419	3.6638	3.93028	4.57449	3.43873
uc007ihx.1	Psme4	chr11	30671774	30780361	7.77006	7.45554	6.98397	6.98823	6.06609	6.50237	7.66154	7.50212	7.4518	7.71401
uc007ihy.1	Psme4	chr11	30727460	30745333	3.2465	3.92156	3.07708	2.80236	3.32193	2.54154	3.42933	3.36092	3.37285	3.43873
uc007ihz.1	AK163075	chr11	30738006	30739918	3.6718	3.65852	3.66204	2.48043	3.58496	4.05612	4.42933	4.16161	3.95781	4.18875
uc007iic.1	Erlec1	chr11	30829783	30854131	5.29712	5.46588	4.66204	5.33841	4.39232	4.48908	5.06979	4.76427	4.69478	5.4871
uc007iij.1	Stc2	chr11	31259440	31269103	2.02411	2.65852	3.07708	3.93986	3.58496	3.31915	0.341871	1.40672	2.05092	3.06676
uc007iim.1	Bod1	chr11	31565149	31571862	9.6442	9.68974	9.6545	9.82028	9.97154	9.89027	9.53847	9.58102	9.7531	9.79548
uc007iip.1	Cpeb4	chr11	31770878	31773074	3.78964	3.65852	5.66204	5.83798	3.80735	3.05612	3.38627	3.40672	3.85828	3.78666
uc007iit.1	mKIAA1673	chr11	31832078	31835057	5.13958	4.65852	6.77752	6.28779	3.58496	4.25775	4.84967	4.65465	3.85828	4.62316
uc007iiw.1	Nsg2	chr11	31900458	31959202	4.26696	4.58452	7.12147	7.23532	1.58496	2.54154	2.73419	2.79904	3.05092	3.06676
uc007ija.2	Snrnp25	chr11	32105414	32108995	8.21656	8.3534	7.98397	8.09514	8.47167	8.35624	8.13629	8.38114	8.77544	8.38018
uc007ije.2	Mpg	chr11	32126504	32132702	2.28714	3.50652	3.07708	1.48043	1.58496	2.05612	2.8013	2.40672	3.51036	3.30123
uc007iji.1	Mare	chr11	32132418	32167658	1.81766	1.92156	3.66204	2.48043	2.32193	2.54154	4.09676	3.45112	2.63589	2.43873
uc007ijq.1	Sh3pxd2b	chr11	32247810	32328183	6.47916	6.96595	11.3532	11.3707	10.0688	9.72571	5.88877	6.09322	6.60551	6.65878
uc007ijr.1	Ubtd2	chr11	32355371	32418709	7.81418	7.78781	7.72093	8.05029	8.07682	8.06958	8.06468	7.91055	7.49387	7.46714
uc007ijw.1	mKIAA0696	chr11	32542874	32615016	3.78964	3.50652	2.07708	2.48043	2	1.73419	3.34187	2.57665	2.05092	3.62316
uc007ikc.1	Fgf18	chr11	33017430	33047400	5.56016	5.82845	2.07708	1.48043	4.08746	4.82165	3.19985	2.86615	3.85828	3.78666
uc007ikd.1	Npm1	chr11	33052510	33063056	9.80547	9.68089	8.247	7.87275	8.79442	9.09832	9.68339	9.41235	9.24568	9.62135
uc007ike.1	Npm1	chr11	33054924	33063056	8.06996	7.70292	5.247	5.56789	7.32193	7.19362	8.16205	7.98604	7.53474	7.54154
uc007ikf.1	Npm1	chr11	33055327	33063056	3.89858	5.54605	4.07708	2.06539	5.45943	5.05612	5.85757	4.81611	4.95781	4.91004
uc007ikg.2	Tlx3	chr11	33100751	33103588	2.8721	2.92156	2.07708	0.480432	6.79442	6.31915	2.14923	2.79904	2.37285	2.88619
uc007ikh.2	Ranbp17	chr11	33111793	33413746	7.1725	6.74599	3.07708	3.28779	5.52356	5.46211	6.83372	7.03608	6.09532	6.60866
uc007ikx.1	Dock2	chr11	34126863	34597325	2.81766	2.3366	2.07708	0.480432	0	2.05612	2.98573	2.40672	3.22085	2.43873
uc007ilc.2	Ccdc99	chr11	34622686	34647143	7.24134	7.14395	5.53651	6.00399	4.85798	5.64108	6.86935	6.62589	5.88381	6.08783
uc007ild.2	Slit3	chr11	34934957	35522009	5.01203	5.14395	2.07708	0.480432	6.22882	5.96301	4.24876	4.05058	3.95781	4.47115
uc007ilf.1	Pank3	chr11	35582996	35604787	8.64176	8.55576	9.52002	9.38431	6.97728	7.17713	9.12323	8.88144	7.80581	7.9793
uc007ilh.2	Rars	chr11	35621882	35648030	9.91041	9.75234	8.20636	8.49724	8.29002	8.6767	9.44385	9.33746	8.9668	9.11757
uc007ilq.2	Mat2b	chr11	40492815	40508705	4.52661	4.03704	3.07708	2.48043	3.32193	2.90411	3.5118	4.02143	4.13839	2.78666
uc007ilr.2	MAT2B	chr11	40498987	40506184	4.43914	4.42406	4.399	3.80236	3	3.31915	5.16205	5.14819	3.37285	4.33685
uc007ilv.2	Hmmr	chr11	40534404	40546939	2.70218	4.03704	4.66204	2.80236	1	1.31915	2.24876	2.65465	2.05092	1.9793
uc007ilx.2	Hmmr	chr11	40536338	40546939	3.57665	3.65852	4.66204	3.65036	3.90689	3.19362	3.8013	3.16161	3.05092	4.06676
uc007ily.1	Nudcd2	chr11	40547143	40553549	9.68897	9.65852	8.66204	8.46912	8.43463	8.52535	9.67447	9.43739	8.99637	9.03051
uc007ilz.1	Ccng1	chr11	40562053	40568788	10.0634	9.82845	10.8747	10.8303	9.17742	9.52046	9.611	9.44221	9.71092	9.79068
uc007imn.2	Pttg1	chr11	43233749	43239483	2.11722	1.3366	2.07708	3.65036	2.80735	2.90411	4.06979	3.99168	3.22085	3.56426
uc007imr.2	C1qtnf2	chr11	43287807	43305027	2.20468	0.336596	2.07708	0.480432	4.24793	3.54154	0.341871	1.57665	4.05092	3.62316
uc007ims.1	Ccnjl	chr11	43342285	43400499	5.34603	5.622	7.95972	7.85547	5.24793	5.51555	5.83372	5.7196	4.51036	5.00167
uc007imu.2	Pwwp2a	chr11	43495499	43520695	5.32667	5.38099	2.07708	3.28779	4.32193	4.48908	5.60866	5.14819	5.29885	5.10858
uc007imv.2	Pwwp2a	chr11	43495499	43536135	4.26696	4.42406	2.07708	3.65036	3.16992	4.19362	4.36424	4.36092	2.85828	3.83728
uc007imx.1	Ttc1	chr11	43543507	43561475	9.00215	8.69854	7.43463	7.58896	7.8009	7.69419	8.90029	8.87229	8.43894	8.6123
uc007ind.1	Ublcp1	chr11	44268074	44274875	2.50953	2.3366	3.07708	2.80236	2.58496	2.73419	1.8013	2.31361	2.05092	1.56426
uc007ing.2	Ublcp1	chr11	44268072	44284050	6.11722	5.46588	5.77752	5.76583	4.64386	5.64108	5.79308	5.77304	5.05092	5.56426
uc007inh.2	Rnf145	chr11	44332465	44379022	9.58686	9.55334	9.399	9.46343	9.98726	10.0091	9.08249	9.0159	8.9182	8.96941
uc007ini.2	Rnf145	chr11	44332878	44368479	3.92457	4.3366	5.07708	5.18087	4.16993	4.25775	4.47115	4.28937	4.05092	3.37162
uc007inq.1	Clint1	chr11	45665465	45724127	2.11722	1.92156	2.07708	2.06539	2	2.54154	1.92683	2.31361	2.05092	1.78666
uc007inr.1	Clint1	chr11	45695898	45724125	3.99986	4.24349	4.07708	4.38732	4.16993	4.90411	4.19985	4.05058	3.75136	4.56426
uc007ins.1	Lsm11	chr11	45741770	45758437	6.38868	6.40269	6.77752	6.68989	6.42626	6.5286	5.9492	6.12782	6.05092	5.74749
uc007inv.1	Thg1l	chr11	45761655	45768996	5.44813	4.79603	3.07708	3.93986	4.64386	4.05612	5.46081	5.21408	4.80581	4.65173
uc007inw.1	Thg1l	chr11	45764679	45768690	3.60907	3.14395	4.07708	2.80236	2	2.54154	2.42933	2.93028	2.63589	2.9793
uc007ioa.1	Nipal4	chr11	45961656	45979861	4.71713	5.14395	4.07708	4.18087	4.90689	4.05612	2.5118	2.21408	3.37285	3.9335
uc007ioz.1	Sgcd	chr11	46792284	47192804	0.924571	0.336596	2.07708	0.480432	2.80735	2.73419	0.926834	0.72865	2.37285	1.30123
uc007ipb.1	Gnb2l1	chr11	48613861	48619743	5.72455	4.65852	4.66204	5.18087	5.70044	5.71147	6.29607	6.39541	6.27974	5.79948
uc007ipc.1	Trim41	chr11	48619905	48630893	8.84258	9.07469	8.63167	9.21514	9.30834	9.24989	9.04664	9.2647	9.15945	9.21172
uc007ipd.2	Trim7	chr11	48639639	48663697	0.924571	2.3366	2.07708	2.48043	3	3.31915	1.34187	2.21408	3.05092	2.30123
uc007ipf.1	AK029860	chr11	48661403	48665711	2.81766	3.65852	4.88443	2.80236	6.02237	5.54154	3.92683	3.53601	4.90891	5.02369
uc007ipg.1	Irgm1	chr11	48678750	48684848	5.04795	4.24349	5.247	5.33841	4.32193	4.12651	3.34187	3.76427	3.75136	4.65173
uc007ipy.1	Zfp62	chr11	49017232	49032318	2.43914	4.14395	4.399	4.28779	3.70044	4.05612	1.8013	1.99168	3.63589	2.14923
uc007iqu.2	Flt4	chr11	49423180	49466241	5.90512	6.71164	3.07708	3.28779	5.75489	5.84271	4.5317	5.34924	5.22085	5.22723
uc007iqx.1	BC079836	chr11	49485005	49488494	5.57665	6.06452	6.77752	6.23532	5.08746	5.09174	6.24876	5.68285	4.90891	5.87412
uc007iqy.1	Cnot6	chr11	49488211	49498637	3.81766	3.92156	4.07708	4.28779	1.58496	2.31915	4.97123	4.89858	3.95781	3.37162
uc007ird.2	Mapk9	chr11	49660252	49686897	1.92457	2.65852	3.66204	2.48043	3.16992	2.31915	0.926834	1.40672	2.63589	2.43873
uc007irk.1	Rnf130	chr11	49838832	49902854	1.11722	1.3366	4.399	3.48043	0	2.05612	0.926834	0.991685	1.63589	0.979301
uc007irv.2	3010026O09Rik	chr11	49988352	50013617	6.61706	6.84439	6.83196	6.88982	6.91886	6.68839	7.27556	7.274	7.47719	7.44691
uc007irw.1	Sqstm1	chr11	50013653	50024292	3.84514	2.92156	4.399	3.28779	3.45943	3.19362	2.73419	2.99168	3.63589	3.06676
uc007iry.2	Mgat4b	chr11	50038836	50048605	7.29214	7.31388	9.38996	9.46057	8.98014	8.86862	7.01783	7.24277	7.13839	7.01272
uc007isc.1	AK157916	chr11	50050513	50102341	2.64078	3.92156	3.66204	1.48043	2.32193	2.05612	1.6638	2.72865	2.37285	2.30123
uc007isn.1	Rufy1	chr11	50202804	50244613	7.15613	7.24349	7.07708	6.98823	6.35755	6.68839	7.12323	7.00664	6.59008	6.73419
uc007isq.1	Zfp354c	chr11	50624586	50641233	5.30704	5.24349	6.60064	6.33841	4.24793	4.05612	5.22451	4.99168	4.29885	4.91004
uc007itd.2	Zfp354b	chr11	50735287	50745137	2.02411	2.65852	3.07708	2.80236	1.58496	2.31915	-0.0731664	2.49418	0.0509239	0.979301
uc007itn.1	AK017220	chr11	51003334	51033915	3.64078	4.50652	2.07708	0.480432	3.32193	2.90411	4.42933	3.96131	4.22085	4.02369
uc007itu.1	Clk4	chr11	51085500	51095266	4.26696	4.79603	4.07708	3.93986	3.70044	5.09174	4.84967	4.23961	4.29885	4.33685
uc007itv.2	Col23a1	chr11	51103421	51397427	1.92457	1.3366	3.66204	1.48043	3.16992	2.54154	1.5118	2.10716	2.85828	1.78666
uc007itw.1	Agxt2l2	chr11	51398258	51406330	2.43914	0.336596	3.07708	0.480432	2.58496	1.73419	1.92683	1.72865	2.37285	1.9793
uc007ity.1	Agxt2l2	chr11	51398258	51416771	2.43914	0.336596	3.07708	2.80236	3.70044	3.82165	3.09676	2.79904	2.05092	3.56426
uc007iub.1	Hnrnpab	chr11	51414370	51420383	3.16161	2.92156	3.07708	3.06539	4	3.54154	3.34187	3.2647	2.63589	2.14923
uc007iuc.1	Nhp2	chr11	51433274	51437216	11.9759	12.0898	10.7601	11.0312	12.0168	11.966	11.421	11.6019	12.0435	11.8593
uc007iud.1	Rmnd5b	chr11	51437174	51449398	9.97013	10.0283	8.92257	9.04267	9.65464	9.5655	9.31341	9.63674	9.89641	9.83573
uc007iue.1	N4bp3	chr11	51456590	51464575	9.94297	10.1472	8.12147	8.10248	9.15987	9.10269	9.25026	9.47214	9.73742	9.47915
uc007iuh.1	0610009B22Rik	chr11	51498886	51502136	7.89529	7.52642	6.46939	6.78421	5.58496	6.09174	7.30187	7.14143	6.70914	6.58663
uc007iuk.1	Sec24a	chr11	51522616	51527191	3.64078	3.14395	3.66204	2.80236	3.70044	2.90411	3.34187	3.65465	2.85828	3.83728
uc007iun.1	Sec24a	chr11	51542569	51570663	4.50953	3.50652	3.66204	2.06539	4.32193	3.54154	4.75126	4.89858	4.44324	3.56426
uc007iuo.1	Sec24a	chr11	51555630	51577136	3.02411	3.14395	3.07708	2.80236	2.58496	3.19362	3.19985	2.49418	3.22085	3.06676
uc007iup.2	Sar1b	chr11	51577164	51605455	7.46151	7.73748	7.77752	7.65036	7.49185	7.59217	8.28292	7.72639	7.78563	7.78666
uc007ius.2	Cdkn2aipnl	chr11	51781132	51790838	10.5168	10.5252	9.77752	9.72122	10.5078	10.4815	10.6553	10.6232	10.4856	10.2502
uc007iut.2	Ube2b	chr11	51798647	51813968	8.31689	8.15038	7.53651	7.9067	6.76818	6.83222	7.97668	7.82668	7.20067	7.35868
uc007ivb.1	Ppp2ca	chr11	51912325	51936251	12.0782	11.8199	11.4758	11.3006	11.1026	11.2074	12.2305	12.1481	11.6975	11.7108
uc007ivf.2	Skp1a	chr11	52045496	52060360	11.0911	10.7181	9.61623	9.83798	9.81698	9.8763	10.5283	10.34	9.8631	10.1015
uc007ivk.1	Tcf7	chr11	52066105	52096516	2.8721	3.65852	3.07708	1.48043	3.16992	3.98212	2.5118	2.86615	4.05092	3.06676
uc007ivm.1	Vdac1	chr11	52174616	52202898	12.4085	12.4471	11.0371	11.2185	12.3501	12.3038	12.5789	12.4457	12.5307	12.4323
uc007ivn.1	9530068E07Rik	chr11	52209929	52217744	2.36514	3.3366	3.07708	2.80236	3	2.05612	2.86543	2.99168	3.05092	2.78666
uc007ivo.1	9530068E07Rik	chr11	52209929	52222225	8.06558	8.06452	9.82527	9.63778	9.40939	9.43463	7.8457	7.66882	8.30831	8.22485
uc007ivq.1	Hspa4	chr11	53073315	53113981	10.4055	10.0178	8.67699	8.66034	8.52356	8.64708	10.2473	10.0888	9.58035	9.74831
uc007ivr.1	Hspa4	chr11	53077748	53113981	4.40262	3.65852	4.66204	3.65036	3.32193	4.37804	4.89646	4.33746	4.57449	3.73419
uc007ivs.1	AK038627	chr11	53112849	53113980	5.53507	5.38099	4.66204	4.87275	5.85798	5.51555	5.86543	5.57665	5.69478	5.78666
uc007ivt.1	Zcchc10	chr11	53138190	53146803	6.71341	6.92156	4.66204	2.80236	4.39232	4.82165	6.8849	6.37251	5.83228	6.02369
uc007ivv.1	BC099959	chr11	53182131	53189427	4.02411	4.03704	3.07708	3.28779	3.45943	4.59217	4.91173	4.13464	3.63589	3.9793
uc007iwy.2	Irf1	chr11	53583515	53591876	2.43914	2.92156	3.07708	1.48043	2	2.31915	1.92683	0.991685	2.63589	2.14923
uc007iwz.2	Irf1	chr11	53583974	53590826	2.20468	2.92156	3.07708	1.48043	1.58496	2.54154	1.8013	2.21408	2.05092	1.56426
uc007ixc.2	Slc22a5	chr11	53678043	53705205	6.28212	5.89118	5.399	5.72836	7.15987	7.07404	6.41333	6.48887	6.44324	6.84349
uc007ixf.2	Pdlim4	chr11	53868429	53882519	2.70218	2.65852	7.83196	8.28133	3	3.73419	0.341871	0.991685	3.22085	2.43873
uc007ixx.2	Fnip1	chr11	54251680	54331743	6.42555	5.69415	6.399	5.80236	4.32193	4.48908	5.37529	4.83299	4.90891	5.12905
uc007iya.1	Rapgef6	chr11	54409647	54452366	3.40262	3.65852	4.399	1.48043	2.80735	3.43463	3.95658	3.2647	3.22085	3.88619
uc007iyd.1	mKIAA4052	chr11	54482104	54512787	2.64078	2.3366	3.07708	2.48043	2	2.31915	3.14923	3.36092	2.85828	2.78666
uc007iyf.2	Cdc42se2	chr11	54530916	54601205	10.4933	10.3295	10.6658	10.767	10.3343	10.378	10.9124	10.9565	10.8445	10.8589
uc007iyj.1	Hint1	chr11	54679939	54683998	11.5824	11.5053	11.3578	11.5922	12.0788	11.9397	11.3999	11.4879	11.6255	11.5009
uc007iyk.1	Gpx3	chr11	54716354	54723889	6.34122	7.03704	6.88443	6.58896	7.06609	6.86347	5.60866	6.20762	6.83228	6.38869
uc007iyt.2	Anxa6	chr11	54804467	54846973	2.70218	2.65852	3.07708	3.48043	1.58496	1.31915	1.92683	2.40672	2.85828	2.43873
uc007iyw.1	Gm2a	chr11	54911618	54924400	8.10306	8.07131	9.3532	9.54652	8.18982	8.09613	7.68395	7.5916	8.04528	7.9364
uc007izd.1	Slc36a1	chr11	55017841	55049832	5.32667	5.3366	6.16454	6.18087	5.24793	5.01959	5.04231	4.72865	4.69478	4.47115
uc007izj.1	Atox1	chr11	55260144	55274640	10.1087	10.2116	9.47796	9.46343	10.0728	9.9702	9.33339	9.49683	10.2007	10.106
uc007izk.1	G3BP	chr11	55283253	55303965	5.6718	6.06452	5.247	5.23532	5.80735	5.86347	5.74275	6.0862	6.15945	5.9335
uc007izl.1	G3bp1	chr11	55283253	55314389	2.8721	3.14395	3.07708	3.06539	3.16992	2.54154	3.73419	3.57665	2.85828	3.78666
uc007izm.1	AK171960	chr11	55315017	55318690	9.14235	8.95498	7.53651	7.52483	8.15987	8.3229	9.64108	9.58165	8.84209	8.89816
uc007izw.1	Mfap3	chr11	57332166	57342591	2.8721	2.3366	3.07708	2.48043	2	1.31915	2.92683	2.99168	3.85828	2.67974
uc007jaa.1	Galnt10	chr11	57458943	57540075	5.02411	4.58452	3.07708	4.48043	5.16993	5.28878	4.55132	4.57665	4.22085	4.78666
uc007jab.1	Galnt10	chr11	57458943	57601002	0.439144	2.3366	3.07708	4.18087	2.32193	2.90411	0.926834	1.40672	1.63589	1.78666
uc007jad.1	AK007998	chr11	57609000	57614919	2.11722	0.336596	2.07708	3.48043	3.45943	3.98212	3.04231	2.99168	2.85828	3.14923
uc007jae.1	Sap30l	chr11	57615138	57624117	7.5643	7.63122	8.1856	8.07289	8.14466	7.98685	7.57309	7.84135	8.32239	8.04
uc007jah.2	Larp1	chr11	57822565	57875534	11.1422	11.2798	10.4302	10.3646	11.7524	11.5508	11.1013	11.1593	10.9495	10.9765
uc007jaj.1	Cnot8	chr11	57917654	57932096	3.20468	4.50652	2.07708	3.80236	2	1.73419	2.24876	2.65465	3.05092	2.43873
uc007jap.2	Mrpl22	chr11	57985155	57993082	9.01884	8.92156	8.43463	8.63525	8.47978	8.42069	8.75126	8.76317	8.9668	8.7672
uc007jbh.1	Sh3bp5l	chr11	58144755	58153865	2.92457	2.92156	3.07708	3.06539	3	2.73419	2.92683	1.99168	2.05092	1.30123
uc007jcm.1	2810021J22Rik	chr11	58680741	58697840	6.34122	6.31388	5.53651	5.18087	4.70044	5.19362	5.62727	5.68285	5.63589	5.70722
uc007jcn.1	Zfp39	chr11	58701654	58717727	4.07141	4.14395	4.66204	5.12429	4.08746	3.90411	4.62727	4.33746	4.44324	4.14923
uc007jcq.1	Rnf187	chr11	58745789	58752408	10.7225	10.9178	11.6714	11.8647	12.3853	12.2454	10.7005	10.8804	11.2221	11.0829
uc007jcr.1	Hist3h2ba	chr11	58762412	58763032	8.51275	8.52642	8.1856	8.9067	10.821	10.659	7.5168	7.75987	8.08984	7.69355
uc007jcs.1	Hist3h2bb-ps	chr11	58767549	58768014	7.32423	6.58452	6.247	6.83798	9.52552	9.40661	6.57069	6.61618	7.26038	6.61593
uc007jct.1	Hist3h2a	chr11	58768186	58770176	4.93739	3.65852	5.66204	5.65036	5.20945	5.51555	3.04231	2.40672	3.51036	3.56426
uc007jcw.1	AK009977	chr11	58779249	58791552	2.02411	1.92156	4.07708	4.06539	3.32193	2.05612	2.24876	1.99168	2.85828	2.56426
uc007jdd.1	A230051G13Rik	chr11	58968870	58977244	6.49226	6.82845	8.14317	8.04267	7.69349	7.42069	6.7765	6.77304	7.51036	7.2033
uc007jdg.2	Guk1	chr11	58997356	59005454	0.924571	2.3366	2.07708	1.48043	2.32193	1.73419	0.341871	1.57665	2.63589	1.9793
uc007jdh.1	AK162965	chr11	59011294	59015887	4.73193	4.98045	3.07708	1.48043	5.2854	4.59217	4.09676	4.84967	4.90891	4.9335
uc007jdl.1	2310033P09Rik	chr11	59021862	59024236	7.11722	7.13101	7.247	7.27485	7.62205	7.22604	6.98212	6.96131	7.16987	7.07733
uc007jdm.2	Arf1	chr11	59024913	59041664	2.36514	3.3366	3.07708	3.65036	3	3.19362	2.42933	2.57665	3.37285	1.78666
uc007jdp.2	Wnt3a	chr11	59061543	59104253	3.57665	4.50652	2.07708	0.480432	2.32193	2.90411	4.24876	3.57665	3.05092	4.30123
uc007jdy.1	Zfp867	chr11	59274698	59285976	4.73193	4.65852	5.66204	3.93986	2.58496	3.19362	4.0143	4.10716	3.63589	4.37162
uc007jef.2	4933439C10Rik	chr11	59319186	59324569	2.02411	1.92156	3.07708	3.48043	2	1.73419	1.92683	2.65465	3.05092	1.30123
uc007jeq.1	AK005722	chr11	59539418	59553656	3.20468	2.65852	3.66204	2.06539	2	2.31915	3.98573	2.79904	1.05092	0.979301
uc007jer.2	Mprip	chr11	59550573	59594362	2.92457	2.3366	4.399	4.18087	5.08746	4.64108	2.04231	2.93028	4.05092	3.50286
uc007jeu.1	Mprip	chr11	59573607	59576905	3.16161	3.3366	3.66204	3.80236	2	2.73419	2.04231	2.86615	2.63589	2.9793
uc007jey.1	Flcn	chr11	59605252	59623338	1.11722	2.92156	2.07708	3.28779	2	2.54154	1.34187	1.21408	2.85828	2.14923
uc007jez.1	Gm16062	chr11	59623615	59631863	3.8721	3.50652	4.07708	2.48043	3.16992	3.64108	2.8013	3.40672	4.29885	2.9793
uc007jfa.1	Cops3	chr11	59631305	59653269	10.0656	9.77539	8.93506	8.87275	8.39232	8.40307	9.85659	9.72244	9.26038	9.38763
uc007jfd.1	Nt5m	chr11	59661574	59690035	0.439144	1.3366	4.66204	4.93986	3.16992	3.19362	1.5118	0.406722	2.37285	1.30123
uc007jfg.1	Med9	chr11	59761715	59776808	8.50953	8.57977	8.87149	8.82028	9.10852	9.02881	8.45561	8.62347	8.77544	8.65349
uc007jfh.1	Rasd1	chr11	59776684	59778444	2.36514	2.65852	2.07708	2.06539	2	2.73419	1.5118	2.21408	2.05092	2.30123
uc007jfj.1	Pemt	chr11	59784118	59859987	1.81766	2.3366	3.66204	3.93986	3.58496	2.90411	1.8013	2.72865	3.37285	1.78666
uc007jfl.1	Rai1	chr11	59953583	60005527	3.2465	3.50652	5.07708	4.48043	5.55459	4.86347	3.62727	3.83299	3.75136	2.78666
uc007jft.1	Tom1l2	chr11	60054071	60166407	1.28714	1.3366	3.66204	2.80236	3.16992	3.05612	0.926834	2.10716	2.37285	0.979301
uc007jfu.1	Lrrc48	chr11	60166881	60207835	4.2465	4.14395	3.66204	4.18087	3.32193	3.19362	4.5898	4.88246	5.00512	4.43873
uc007jfv.2	Atpaf2	chr11	60214125	60230601	8.81505	9.08479	8.66204	8.56258	9.16992	9.10705	8.87033	9.01867	9.15945	9.03458
uc007jfw.2	4933439F18Rik	chr11	60230646	60258779	7.45929	7.60338	6.399	6.20835	6.50779	6.43463	7.5118	7.54883	6.81911	6.57921
uc007jfy.1	Drg2	chr11	60268118	60282207	10.6003	10.682	10.1539	10.4215	11.0947	11.1027	10.5002	10.6268	10.9427	10.824
uc007jgd.2	Alkbh5	chr11	60351184	60372014	10.3418	10.2995	10.1432	10.2797	10.3276	10.3387	9.98978	10.0492	9.88697	9.80585
uc007jgj.1	Smcr7	chr11	60541899	60546453	7.36039	7.41341	7.98397	8.3813	8.47167	8.20179	7.87715	8.02511	8.10077	8.19362
uc007jgm.1	Top3a	chr11	60555392	60590867	2.92457	3.65852	3.66204	2.06539	3.45943	2.31915	3.34187	3.21408	2.63589	2.88619
uc007jgn.1	Smcr8	chr11	60591026	60601789	8.4604	8.31388	7.07708	6.98823	6.88264	7.29643	7.73419	7.61129	7.52666	7.59033
uc007jgo.1	Shmt1	chr11	60602398	60624767	10.0816	9.81435	7.90997	8.31964	9.22882	9.26362	9.9022	9.92881	9.51036	9.5652
uc007jgp.1	Shmt1	chr11	60610746	60624767	1.43914	2.65852	3.07708	0.480432	1	1.73419	2.73419	2.21408	2.63589	1.56426
uc007jgt.1	AK140192	chr11	60692619	60700720	3.64078	4.14395	2.07708	3.28779	3.80735	3.82165	3.42933	3.45112	3.75136	3.14923
uc007jgu.2	Gm16515	chr11	60715747	60727294	8.83746	9.06452	9.92257	10.1739	8.67243	8.57024	8.83773	9.04516	9.27734	9.18754
uc007jgv.1	Gm16516	chr11	60734442	60745369	5.99373	5.89118	5.247	4.28779	5.45943	5.51555	5.14923	5.12097	5.63589	5.65173
uc007jgw.1	Map2k3	chr11	60745558	60761093	2.8721	2.3366	3.07708	0.480432	3	2.54154	1.34187	1.40672	3.05092	1.9793
uc007jhc.2	Usp22	chr11	60965282	60988561	10.7208	10.7171	11.0196	11.0691	11.5584	11.5314	10.7859	10.9396	11.046	11.0089
uc007jhf.1	Aldh3a2	chr11	61058256	61080629	7.72824	7.55576	7.07708	7.00399	6.62936	7.16045	8.21531	8.36672	7.47719	7.47516
uc007jhu.1	B9d1	chr11	61318673	61326429	7.61706	7.67645	8.52002	8.55725	7.65105	7.47566	7.87909	8.06493	8.36381	7.99611
uc007jic.1	Fam83g	chr11	61497592	61500360	3.76107	4.50652	2.07708	2.06539	4.75489	4.59217	2.42933	2.79904	3.85828	4.14923
uc007jid.1	Fam83g	chr11	61497911	61523452	6.54348	6.99481	3.07708	2.80236	7.15987	7.09174	5.06979	5.25221	6.22085	5.40557
uc007jih.2	Ulk2	chr11	61589099	61668594	4.59295	4.58452	7.63167	7.56789	5.70044	6.14358	3.92683	4.63554	4.29885	5.06676
uc007jii.1	Akap10	chr11	61684808	61743728	7.21525	6.82845	5.07708	5.06539	5.61471	5.46211	7.25176	7.01775	6.47719	6.62316
uc007jik.1	Akap10	chr11	61705278	61743728	1.43914	1.92156	3.66204	2.06539	3.16992	2.73419	1.6638	2.49418	3.37285	2.88619
uc007jin.1	Specc1	chr11	61890598	62036515	6.4301	6.21924	9.4258	9.53571	6.74147	6.97259	5.92683	5.7196	5.85828	5.40557
uc007jio.1	Adora2b	chr11	62062485	62079954	4.74657	4.79603	3.66204	4.65036	5.24793	5.05612	5.28439	5.10716	5.00512	5.24609
uc007jip.2	Zswim7	chr11	62080725	62094897	7.65637	7.68532	7.03127	6.87275	7.6865	7.78947	7.75126	7.91452	8.26038	8.27392
uc007jiq.2	Ttc19	chr11	62094974	62096090	2.64078	3.65852	4.07708	4.06539	3.58496	3.54154	3.95658	4.10716	3.37285	3.22723
uc007jjb.1	Ncor1	chr11	62198284	62271308	1.70218	2.65852	3.07708	2.06539	1	2.05612	2.42933	1.99168	2.37285	2.88619
uc007jjd.1	Ncor1	chr11	62214884	62270834	5.01203	4.79603	5.53651	4.48043	4.85798	4.86347	6.12323	5.384	5.33633	5.60866
uc007jjf.2	Cenpv	chr11	62338445	62352763	8.77721	8.6358	9.85186	10.0312	10.0914	9.87502	8.89358	9.01405	9.60167	9.47615
uc007jjg.1	Ubb	chr11	62365005	62366714	13.0603	13.4111	12.6936	12.8617	13.2953	13.1598	12.9551	12.9069	13.3583	13.2421
uc007jjl.1	2410006H16Rik	chr11	62416378	62418308	7.86541	7.53627	7.20636	7.18087	7.8009	7.95336	8.44778	8.1848	7.90891	7.88919
uc007jjo.1	BC046404	chr11	62418385	62462025	0.439144	1.3366	2.07708	2.80236	1.58496	2.90411	1.34187	1.21408	3.05092	2.43873
uc007jjp.1	AK005754	chr11	62419267	62420525	5.77543	5.89118	5.07708	4.48043	6.12928	5.96301	6.09676	5.90657	5.88381	5.33685
uc007jjr.1	Mmgt2	chr11	62462165	62479861	2.36514	3.3366	3.66204	3.48043	2.58496	1.73419	3.04231	3.49418	4.05092	2.9793
uc007jjt.1	Zfp287	chr11	62513857	62545407	3.57665	2.65852	3.07708	2.48043	4.24793	3.82165	3.04231	4.33746	4.22085	3.9793
uc007jju.1	Zfp287	chr11	62524987	62542595	3.47477	4.03704	5.77752	5.28779	3.16992	3.43463	2.8013	3.21408	3.51036	3.43873
uc007jkh.1	Fam18b	chr11	62692991	62708686	7.61905	7.47615	6.93506	6.87275	5.9542	6.31915	7.49922	7.3463	7.36381	7.26932
uc007jkm.1	Pmp22	chr11	62945011	62973048	6.11722	6.00902	6.46939	7.13864	7.96	8.05612	4.83372	4.67351	6.07329	5.94509
uc007jkn.1	Hs3st3b1	chr11	63698194	63735786	6.27709	6.56541	8.84526	8.54113	8	7.83222	4.6638	4.59655	6.0282	5.77372
uc007jko.2	Cox10	chr11	63776128	63892974	8.18868	8.46072	8.2669	8.51385	9.45943	9.16255	8.21531	8.46877	8.4518	8.35651
uc007jkq.2	2810001G20Rik	chr11	63892985	63896761	6.29712	6.16949	6.399	6.09514	6.2854	6.44843	6.11666	5.98415	6.42596	6.13917
uc007jkr.1	Hs3st3a1	chr11	64248833	64336337	0.924571	1.3366	4.88443	5.68989	8.24793	8.12221	-0.658129	0.406722	4.69478	4.76066
uc007jks.2	Elac2	chr11	64792536	64815578	10.5583	10.7181	9.06576	9.40227	11.0119	10.9004	10.3019	10.5574	10.6406	10.5586
uc007jlm.2	Shisa6	chr11	66025226	66339628	3.07141	2.65852	4.07708	5.56789	5.32193	4.82165	0.341871	0.72865	1.63589	1.56426
uc007jln.1	Pirt	chr11	66725492	66742202	3.28714	4.3366	2.07708	1.48043	1	2.05612	5.28439	5.462	4.44324	4.53389
uc007jlu.1	Sco1	chr11	66866171	66880942	5.85193	5.98045	3.07708	4.18087	5.70044	5.37804	5.36424	5.79043	5.22085	5.81219
uc007jlx.1	Myh3	chr11	66891801	66915793	3.28714	2.65852	2.07708	1.48043	2	0.734188	4.04231	4.40672	2.85828	4.10858
uc007jnh.1	Stx8	chr11	67779984	67788090	4.28714	4.50652	4.88443	2.80236	3.58496	3.73419	4.71691	4.18808	4.69478	4.70722
uc007jni.1	Stx8	chr11	67779984	67801111	3.40262	4.03704	3.66204	2.80236	0	2.31915	3.5898	3.16161	2.63589	2.88619
uc007jnm.1	Ntn1	chr11	68022865	68200328	9.41871	9.66751	10.8584	11.1143	11.697	11.4325	9.05869	9.19951	9.5784	9.40031
uc007joa.1	Myh10	chr11	68512711	68583145	1.92457	3.50652	3.07708	3.93986	3.32193	3.19362	2.5898	2.99168	2.05092	2.30123
uc007joi.1	Rpl26	chr11	68715136	68718036	4.07141	4.72891	4.399	3.28779	5.08746	3.90411	4.5317	4.40672	4.22085	4.67974
uc007jol.1	Arhgef15	chr11	68756655	68770360	4.26696	4.3366	2.07708	0.480432	3	3.43463	4.92683	5.27709	3.95781	4.02369
uc007jon.1	Arhgef15	chr11	68761733	68765676	3.16161	2.65852	2.07708	3.48043	2.80735	2.90411	3.62727	3.69212	4.29885	2.88619
uc007jor.1	Rangrf	chr11	68785988	68787322	9.55393	9.40806	7.72093	7.98823	9.21917	9.1792	9.43463	9.50541	9.52057	9.34781
uc007jov.2	Pfas	chr11	68810456	68821962	2.81766	2.3366	3.07708	3.48043	3.32193	2.90411	3.76814	4.28937	3.37285	3.83728
uc007jpa.1	Aurkb	chr11	68859144	68865164	9.88788	9.93092	9.38996	9.78193	10.2877	10.2069	9.93012	10.1304	9.93204	9.95944
uc007jpb.1	2310047M10Rik	chr11	68873276	68875078	6.18868	6.67645	7.88443	8.36917	8.02237	7.659	5.59926	5.65465	6.79239	6.87412
uc007jpe.1	Vamp2	chr11	68902029	68905883	4.71713	5.24349	7.93506	7.24862	5.88264	5.71147	5.89646	5.49418	6.0282	5.67974
uc007jpf.1	Per1	chr11	68908755	68919960	3.64078	3.3366	3.66204	4.18087	4.45943	4.31915	3.5898	4.13464	4.57449	4.33685
uc007jpj.2	Aloxe3	chr11	68939878	68962617	3.32667	2.92156	2.07708	0.480432	3.16992	2.31915	1.6638	0.991685	2.37285	1.30123
uc007jps.1	Kcnab3	chr11	69139759	69146543	2.57665	1.92156	4.399	3.65036	1	2.54154	2.04231	2.10716	2.37285	2.43873
uc007jpv.2	A030009H04Rik	chr11	69154270	69156149	4.34603	3.92156	4.66204	5.68989	3.16992	2.73419	4.83372	4.55647	3.22085	3.9793
uc007jpy.1	Chd3	chr11	69156774	69182928	7.39334	7.575	6.16454	6.26179	7.14975	7.24989	7.20606	7.45657	5.88381	6.00167
uc007jpz.1	Cyb5d1	chr11	69207113	69208848	7.04499	6.96595	6.07708	6.52483	5.78136	6.14358	6.93059	6.77741	6.54278	6.32803
uc007jqc.2	Tmem88	chr11	69210017	69211736	6.98449	7.06452	2.07708	2.06539	7.10852	7.14358	6.26668	6.40672	7.14896	6.84349
uc007jqe.1	Kdm6b	chr11	69212019	69227175	3.99986	5.03704	6.88443	6.98823	7.26679	6.42069	4.94178	4.47281	5.83228	4.76066
uc007jqf.1	Kdm6b	chr11	69216438	69219675	2.28714	2.3366	3.07708	2.48043	3.16992	3.19362	2.5118	2.57665	1.63589	2.14923
uc007jqg.1	Dnahc2	chr11	69234310	69362610	2.92457	3.79603	2.07708	2.06539	2.32193	1.73419	4.27261	4.53601	3.95781	4.33685
uc007jqi.2	Efnb3	chr11	69367593	69373739	4.30704	4.3366	5.66204	5.76583	4.08746	3.90411	5.87325	6.02143	5.69478	5.20812
uc007jqo.1	Atp1b2	chr11	69413251	69419462	4.60907	5.19458	8.34386	8.04267	3.80735	3.98212	5.70819	5.56659	6.18021	5.76066
uc007jqt.1	Fxr2	chr11	69446472	69466799	11.1791	11.2405	10.6085	10.7944	11.2639	11.1777	11.0645	11.2277	11.1123	11.0999
uc007jqu.1	Sox15	chr11	69468874	69470123	6.8107	6.89118	2.07708	0.480432	4.70044	5.01959	6.49162	6.70134	7.13839	6.9393
uc007jrb.2	Senp3	chr11	69486611	69495472	6.34603	6.64038	3.07708	4.87275	5.78136	5.64108	6.11666	6.43463	6.40848	5.83728
uc007jri.2	Tnfsf12	chr11	69499741	69509600	4.49226	4.79603	4.399	4.80236	3.90689	4.68839	4.0143	4.02143	4.37285	3.9335
uc007jrq.2	Chrnb1	chr11	69597537	69609439	4.59295	4.72891	4.66204	3.65036	4.52356	4.43463	5.30766	5.42909	5.90891	5.57921
uc007jrs.2	Tmem102	chr11	69617096	69619126	6.27709	6.40269	2.07708	0.480432	6.83289	6.65305	5.38627	5.7196	6.27974	6.51068
uc007jrt.2	G630025P09Rik	chr11	69617170	69619540	1.70218	1.92156	4.07708	3.48043	3	2.54154	0.341871	0.991685	3.05092	2.78666
uc007jrx.1	Nlgn2	chr11	69636624	69651286	2.28714	3.50652	6.53651	6.78421	4	3.43463	1.5118	1.21408	1.63589	1.9793
uc007jry.1	1810027O10Rik	chr11	69652026	69653060	8.26696	8.31388	9.61623	9.6996	8.3837	8.22203	8.4878	8.6271	8.829	8.58293
uc007jsb.2	Tnk1	chr11	69664064	69672232	6.34122	5.98045	3.07708	1.48043	4.58496	5.48908	4.5118	4.42909	4.37285	4.95658
uc007jsd.2	Kctd11	chr11	69691765	69694487	6.58074	6.622	6.93506	7.49166	7.13955	7.10051	5.02837	4.72865	5.83228	5.42224
uc007jsp.1	Gps2	chr11	69727693	69730093	6.083	6.48634	7.07708	7.75656	6.74147	6.72287	6.30766	6.55138	6.42596	6.04539
uc007jsq.2	Eif5a	chr11	69730213	69734132	2.28714	2.92156	2.07708	2.06539	3	2.31915	1.34187	1.57665	1.63589	1.30123
uc007jsw.1	Ybx2	chr11	69749400	69755101	3.8721	4.42406	2.07708	1.48043	3.32193	3.64108	3.38627	3.69212	2.63589	3.30123
uc007jtb.2	Cldn7	chr11	69778922	69781388	4.99986	4.92156	2.07708	0.480432	5.24793	5.43463	1.6638	1.72865	3.05092	3.06676
uc007jtc.2	Derp6	chr11	69781726	69793745	2.11722	3.3366	2.07708	2.48043	3	1.73419	1.34187	1.57665	2.63589	1.9793
uc007jtf.1	Ctdnep1	chr11	69794669	69804102	7.83318	7.99481	9.2669	9.28779	9.21189	8.751	7.3503	7.74434	7.75828	7.60501
uc007jtg.2	Gabarap	chr11	69804871	69808451	10.0841	9.98405	11.0196	11.1043	9.99435	9.93263	9.07912	9.19217	9.66747	9.55767
uc007jtl.1	Dvl2	chr11	69814127	69820463	3.32667	3.65852	5.07708	4.28779	2.80735	3.31915	2.04231	2.57665	3.22085	3.22723
uc007jtn.1	Dvl2	chr11	69814127	69825803	5.23616	4.92156	5.247	5.56789	4.85798	5.16045	4.92683	4.7105	5.29885	5.00167
uc007jto.1	Acadvl	chr11	69823693	69828909	8.52129	8.35896	10.3671	10.5235	9.54689	9.41015	8.33764	8.47416	9.11432	9.0839
uc007jub.1	Slc16a13	chr11	70030293	70034496	6.39334	6.52642	6.72093	7.41117	6.61471	6.82165	4.97123	5.49418	5.33633	5.40557
uc007juc.2	Bcl6b	chr11	70037628	70043300	7.38166	7.47615	6.247	6.38732	6.70044	6.85313	5.41869	5.28937	5.00512	4.81219
uc007juo.1	Alox15	chr11	70157648	70165533	3.16161	3.14395	2.07708	0.480432	6.18982	6.14358	2.86543	3.79904	3.51036	4.50286
uc007jup.2	Pelp1	chr11	70206382	70223533	9.64518	9.8042	9.06576	8.96425	10.5925	10.1987	9.73687	9.78339	9.66195	9.62856
uc007juv.1	Med11	chr11	70265432	70267228	8.27835	8.45554	7.805	7.74722	8.12928	8.16045	8.00365	8.07206	8.33633	8.09564
uc007jvb.2	Tm4sf5	chr11	70318775	70324686	4.99986	4.79603	2.07708	0.480432	4	2.90411	4.09676	3.45112	4.44324	3.14923
uc007jve.2	Psmb6	chr11	70338858	70341360	12.0538	12.2625	11.8486	12.0933	12.3284	12.2895	11.8866	12.1027	12.5498	12.4193
uc007jvr.1	Slc25a11	chr11	70457698	70460495	9.89611	10.0055	10.6507	10.7519	10.584	10.4706	9.74382	9.99871	10.0353	9.953
uc007jvu.1	Rnf167	chr11	70461090	70464916	2.43914	3.65852	3.07708	1.48043	3	2.90411	2.73419	3.05058	4.13839	3.06676
uc007jvv.2	Pfn1	chr11	70465348	70468152	12.9561	13.3438	13.4902	13.6002	14.2291	14.1267	12.8661	13.1487	13.5782	13.3137
uc007jwa.2	Camta2	chr11	70482964	70497278	0.702178	1.3366	4.66204	3.06539	3.45943	2.05612	-0.658129	0.991685	1.05092	0.564264
uc007jwk.1	Kif1c	chr11	70514049	70520847	2.11722	1.92156	3.07708	2.48043	1.58496	2.90411	1.34187	0.72865	2.37285	1.9793
uc007jwo.1	Zfp3	chr11	70577948	70586431	4.36514	4.72891	5.77752	5.28779	4.85798	4.90411	5.23669	5.34924	5.75136	5.81219
uc007jwq.2	Rabep1	chr11	70658264	70707388	3.02411	2.3366	3.07708	2.48043	3.45943	2.05612	1.92683	1.57665	2.63589	1.56426
uc007jwv.1	Nup88	chr11	70756572	70783382	2.64078	2.65852	4.07708	2.80236	2.58496	2.73419	3.42933	3.40672	3.51036	3.9335
uc007jwz.1	Nup88	chr11	70763066	70783475	3.47477	3.50652	2.07708	2.06539	1	3.19362	3.83372	3.72865	2.37285	3.22723
uc007jxf.1	C1qbp	chr11	70791347	70796528	11.3669	11.3345	9.13236	9.41707	11.098	11.0213	11.3642	11.3772	11.083	11.1845
uc007jxg.1	Dhx33	chr11	70797592	70817934	5.52661	5.24349	4.66204	5.43463	3.16992	4.37804	5.76814	5.63554	5.13839	4.65173
uc007jxh.1	Dhx33	chr11	70812617	70817934	5.1725	5.24349	4.399	3.65036	4.32193	4.94364	5.46081	5.2647	4.90891	5.40557
uc007jxo.1	6330403K07Rik	chr11	70845442	70847119	3.84514	4.24349	7.247	7.16693	3.90689	3.64108	2.6638	1.86615	3.51036	2.67974
uc007jxq.2	Nlrp1a	chr11	70904698	70958206	8.0226	7.67645	2.07708	1.48043	5.61471	5.84271	8.02487	8.42074	7.67298	7.32803
uc007jxx.1	Wscd1	chr11	71564877	71574470	3.84514	3.65852	5.66204	5.52483	1	1.31915	2.8013	3.31361	2.63589	2.56426
uc007jxy.2	Aipl1	chr11	71842223	71851011	1.57665	2.3366	3.07708	2.48043	2.58496	2.54154	1.6638	1.21408	1.05092	-0.020699
uc007jxz.1	Fam64a	chr11	71856003	71860872	8.40608	8.37551	10.5117	10.7819	8.96578	8.91161	8.146	8.384	7.83883	7.9393
uc007jyj.1	Txndc17	chr11	72021055	72023989	9.2676	9.21004	7.56893	8.12429	8.57743	8.57968	9.08586	8.9945	9.02534	8.76394
uc007jyk.1	Med31	chr11	72025225	72029094	7.15064	7.21924	6.83196	7.09514	6.59991	6.10923	7.19985	7.31662	7.07329	6.67974
uc007jym.2	Slc13a5	chr11	72055495	72080106	3.92457	4.14395	3.07708	3.28779	1	1.31915	5.56104	5.49418	5.44324	5.2647
uc007jyv.1	Smtnl2	chr11	72203615	72225215	8.06412	8.41341	5.77752	5.33841	7.61471	7.64108	9.06639	9.2269	9.13041	9.07996
uc007jyz.2	Spns2	chr11	72265139	72303406	2.20468	2.3366	4.88443	4.87275	3	3.05612	1.34187	1.72865	3.37285	3.06676
uc007jzg.1	Ankhzn	chr11	72503503	72538682	2.64078	2.3366	4.399	2.48043	1	1.31915	3.09676	2.40672	1.63589	1.30123
uc007jzi.2	Cyb5d2	chr11	72590733	72609341	1.28714	1.92156	4.66204	4.28779	2.80735	2.90411	1.34187	1.72865	2.05092	1.9793
uc007jzl.2	Zzef1	chr11	72609727	72740622	7.81939	7.77122	7.20636	7.61998	7.04439	7.40661	7.48653	7.47818	7.20067	7.46312
uc007jzn.2	Zzef1	chr11	72725797	72740622	0.702178	2.65852	3.07708	2.06539	1	2.05612	1.34187	1.21408	2.05092	2.30123
uc007jzt.1	Camkk1	chr11	72832509	72855567	6.03011	6.11796	6.07708	5.52483	5.97728	5.82165	5.69942	6.07915	6.07329	6.04539
uc007jzu.2	1200014J11Rik	chr11	72861368	72870239	4.34603	4.3366	2.07708	2.80236	2.58496	3.05612	4.27261	3.93028	3.05092	3.78666
uc007jzz.2	Gsg2	chr11	72948985	72951796	8.62699	8.53135	6.98397	7.01959	8.33092	8.09613	8.82971	8.76427	8.59008	8.57735
uc007kaa.2	P2rx5	chr11	72974031	72986189	4.13958	4.3366	3.07708	2.48043	2.58496	1.73419	5.08334	5.07915	5.05092	4.76066
uc007kad.1	Tax1bp3	chr11	72990584	72996664	3.2465	3.3366	4.88443	3.80236	2.58496	3.05612	4.29607	2.86615	3.37285	3.14923
uc007kbz.1	E130309D14Rik	chr11	74433106	74455018	7.75927	8.05084	2.07708	3.28779	6.61471	6.88394	6.29024	6.70593	7.31771	7.39715
uc007kca.1	1300001I01Rik	chr11	74462996	74484349	2.76107	3.14395	4.399	3.48043	4.24793	3.43463	3.34187	3.21408	3.75136	3.22723
uc007kcd.2	Pafah1b1	chr11	74487451	74537886	4.2465	4.03704	4.66204	3.93986	4.08746	3.73419	4.40796	4.49418	3.95781	3.43873
uc007kce.2	Pafah1b1	chr11	74487450	74537360	4.0945	4.14395	5.66204	5.56789	4.52356	4.90411	3.5118	4.13464	4.75136	4.53389
uc007kcg.1	AK039862	chr11	74524036	74527464	4.83146	5.14395	4.07708	3.93986	3.16992	4.19362	4.91173	4.59655	4.05092	3.56426
uc007kck.1	Sgsm2	chr11	74662765	74710582	6.90512	6.95131	8.77752	9.05408	8.33539	8.41015	7.35589	7.48887	7.75136	7.65526
uc007kcl.1	mKIAA0397	chr11	74670068	74674077	0.117216	2.3366	4.66204	3.06539	2.80735	2.31915	1.8013	1.72865	3.05092	2.30123
uc007kcm.1	Tsr1	chr11	74711581	74715357	2.70218	3.3366	3.07708	3.28779	2.32193	2.73419	2.86543	2.21408	2.37285	2.9793
uc007kdf.1	Ovca2	chr11	74989444	74992815	4.421	4.3366	4.07708	3.93986	4.90689	5.25775	4.14923	4.36092	4.69478	4.50286
uc007kdg.1	Dph1	chr11	74989444	75003985	7.0945	7.05084	7.85844	7.6403	8.5812	8.49574	7.59926	7.82035	8.05092	8.03729
uc007kdh.1	Rtn4rl1	chr11	75007494	75081264	3.60907	3.65852	6.16454	6.00399	4.9542	4.90411	4.5118	4.96131	5.13839	5.24609
uc007kdp.1	Serpinf1	chr11	75223530	75236125	6.43914	6.42406	5.66204	5.52483	8.36194	8.54154	5.5118	5.60639	7.10621	6.73419
uc007kdv.1	2210403K04Rik	chr11	75275040	75280192	4.1833	4.14395	4.66204	3.80236	4.75489	5.05612	4.76814	4.74657	5.40848	4.81219
uc007kdx.1	Prpf8	chr11	75300278	75322949	12.6696	12.7114	10.6469	10.8631	11.9318	12.0829	12.2215	12.2724	12.0885	12.1909
uc007kdz.1	Rilp	chr11	75323595	75326668	2.28714	2.3366	3.66204	3.80236	3.45943	2.73419	2.04231	2.10716	2.85828	1.78666
uc007ked.2	Slc43a2	chr11	75345613	75391074	-0.297822	1.92156	2.07708	2.48043	3.16992	2.73419	1.14923	1.57665	2.37285	1.78666
uc007kef.1	slc43a2	chr11	75379508	75383691	3.11722	2.92156	3.66204	2.48043	5	4.90411	2.8013	2.40672	3.75136	3.56426
uc007kej.1	Inpp5k	chr11	75444521	75448770	3.92457	4.14395	3.07708	1.48043	2.80735	2.73419	2.5118	2.72865	2.05092	3.43873
uc007kem.1	Myo1c	chr11	75465010	75488136	2.02411	2.92156	3.66204	2.80236	2.32193	2.31915	1.92683	2.31361	3.37285	2.43873
uc007ken.1	Myo1c	chr11	75465651	75488136	2.8721	2.3366	3.07708	2.06539	3.32193	2.54154	2.34187	1.57665	3.05092	2.9793
uc007keo.1	Myo1c	chr11	75469516	75483089	2.8721	3.92156	2.07708	1.48043	3.32193	2.54154	3.24876	3.45112	3.85828	2.9793
uc007keq.1	Crk	chr11	75492811	75506362	2.70218	3.14395	2.07708	1.48043	1.58496	2.05612	2.92683	2.21408	2.85828	3.06676
uc007ket.2	Ywhae	chr11	75546388	75579343	9.21393	8.91403	7.72093	7.77505	7.49185	7.4689	8.73204	8.53986	7.85182	7.59033
uc007kez.2	Fam101b	chr11	75832696	75841284	4.1833	4.42406	5.66204	5.9067	6.12928	6.12651	4.36424	4.2647	4.29885	5.00167
uc007kfa.1	Vps53	chr11	75859727	75993132	5.65637	5.95131	4.07708	5.33841	5.49185	5.40661	5.72558	5.49418	5.40848	5.16913
uc007kfb.1	Vps53	chr11	75875542	75906181	1.81766	1.3366	2.07708	0.480432	2	2.31915	2.8013	2.31361	2.05092	1.30123
uc007kfe.1	Vps53	chr11	75990463	75993132	3.76107	4.50652	4.07708	3.48043	3.70044	4.25775	3.73419	3.49418	4.44324	3.62316
uc007kff.1	Fam57a	chr11	75993172	76028329	3.16161	3.65852	3.07708	3.80236	3.16992	3.05612	4.94178	2.72865	3.05092	2.56426
uc007kfg.2	Fam57a	chr11	76015557	76021759	4.8721	5.19458	6.399	6.93986	6.02237	6.36354	4.95658	5.28937	5.66563	5.33685
uc007kfk.1	Dbil5	chr11	76031114	76032167	2.43914	3.14395	3.07708	1.48043	3	3.31915	3.14923	3.72865	2.37285	2.43873
uc007kfl.2	Glod4	chr11	76033896	76057201	8.29214	8.00193	6.77752	6.65036	7.49185	7.42069	7.98933	7.65465	7.89013	7.85275
uc007kfn.2	Rnmtl1	chr11	76057237	76064124	7.21525	7.51651	6.60064	6.9067	7.59246	7.34152	7.07319	7.04335	7.89641	7.78666
uc007kfo.2	Nxn	chr11	76070727	76212643	9.50738	9.62661	8.93506	9.42295	10.9915	10.9424	10.4992	10.6183	10.5011	10.455
uc007kfp.2	Nxn	chr11	76172304	76212643	3.07141	3.3366	2.07708	0.480432	3.45943	3.54154	4.36424	4.16161	3.85828	3.22723
uc007kfq.2	Timm22	chr11	76220668	76229814	5.0945	4.24349	3.66204	4.65036	4.85798	5.25775	4.84967	5.00664	4.95781	4.37162
uc007kfz.1	Gosr1	chr11	76540103	76577057	8.97753	8.92156	8.79132	8.57846	8.224	8.41367	8.72989	8.79904	8.66563	8.61411
uc007kga.1	Cpd	chr11	76590709	76660510	7.09736	6.65852	8.60064	8.59937	5.9542	6.56708	6.90411	7.07915	6.52666	6.61593
uc007kge.2	Blmh	chr11	76759157	76800891	10.8868	10.7192	9.52829	9.72836	10.0485	10.0277	11.0136	10.9775	10.6984	10.7879
uc007kgg.1	Ccdc55	chr11	76857793	76891937	4.49226	4.92156	5.07708	5.00399	3.90689	3.90411	4.42933	3.53601	3.85828	3.78666
uc007kgh.1	Ccdc55	chr11	76865150	76891937	5.8107	5.58452	5.247	4.65036	5.90689	6.12651	6.39715	6.11408	6.20067	6.15921
uc007kgy.1	Git1	chr11	77306913	77321276	9.46871	9.84241	10.5888	10.6862	11.0382	10.7559	9.30332	9.53536	10.1331	9.86423
uc007kgz.1	Trp53i13	chr11	77321600	77326775	5.65637	6.24349	7.20636	7.09514	6.58496	6.31915	5.76814	6.33746	6.39077	6.29218
uc007kha.1	Abhd15	chr11	77328618	77334130	2.70218	3.3366	6.46939	6.48043	3.90689	3.43463	1.5118	1.86615	3.51036	2.67974
uc007khc.1	Taok1	chr11	77342663	77421317	7.94535	7.63122	9.56089	9.15991	7.22882	7.43463	8.18579	7.87025	7.75136	8.0427
uc007khd.2	Nufip2	chr11	77499640	77531468	10.4786	10.073	9.46078	9.02733	8.7211	9.24594	10.3975	10.1093	9.74267	9.80982
uc007khf.1	Myo18a	chr11	77576802	77593697	3.9752	3.79603	3.07708	3.06539	2	1.73419	2.98573	2.31361	3.22085	2.78666
uc007khm.2	Pipox	chr11	77694116	77707374	9.13889	9.00548	7.83196	7.9067	7.2854	7.59217	9.39104	9.38472	9.23332	8.99889
uc007khr.2	Phf12	chr11	77796317	77823425	0.702178	3.14395	3.07708	1.48043	0	2.05612	1.6638	1.86615	2.37285	1.9793
uc007kht.2	Phf12	chr11	77796317	77844037	7.13402	7.27911	6.77752	6.38732	7.18982	7.14358	7.31054	7.07915	7.51853	7.28764
uc007kia.2	Eral1	chr11	77886877	77893885	4.98758	4.3366	4.07708	3.93986	4.45943	5.3489	5.06979	5.05058	5.22085	4.86194
uc007kig.2	Traf4	chr11	77972000	77979052	1.28714	2.65852	4.07708	2.48043	0	1.73419	2.04231	1.40672	0.0509239	0.564264
uc007kih.2	Nek8	chr11	77979607	77990168	6.68707	6.86016	8.05436	8.04267	7.42626	7.44155	7.22757	7.3226	7.01671	7.12396
uc007kik.1	Tlcd1	chr11	77992187	77994274	2.76107	1.92156	3.66204	2.06539	4	3.31915	3.29607	3.49418	4.13839	3.73419
uc007kil.2	Rpl23a	chr11	77994436	77997086	14.0253	13.9	13.2774	13.38	12.7879	12.9363	13.5125	13.5239	13.5597	13.2046
uc007kim.2	Rab34	chr11	78002249	78005695	2.02411	3.3366	5.53651	5.48043	5.04439	3.98212	2.73419	3.45112	3.51036	3.88619
uc007kio.2	Supt6h	chr11	78020250	78037188	2.50953	3.14395	2.07708	1.48043	3	2.31915	2.14923	2.93028	4.22085	3.56426
uc007kip.2	Supt6h	chr11	78020250	78059205	9.72593	9.70073	7.46939	7.53571	8.26679	8.43116	9.18344	9.07738	8.69478	8.95228
uc007kiq.2	Sdf2	chr11	78059247	78068998	7.83489	7.95865	8.88443	8.83358	8.2384	8.1854	7.51929	7.43739	8.35013	8.11629
uc007kir.2	2610507B11Rik	chr11	78075255	78104127	12.4576	12.3513	11.5054	11.7301	11.6658	11.7799	12.3453	12.3376	11.9698	12.1071
uc007kiv.2	Spag5	chr11	78115092	78135956	9.60606	9.4838	9.13236	9.25192	8.91289	8.97259	9.78326	9.76976	9.54678	9.64286
uc007kiy.1	Pigs	chr11	78141923	78148375	3.73193	2.3366	2.07708	3.28779	3.45943	2.31915	3.34187	3.36092	2.85828	2.67974
uc007kiz.1	Pigs	chr11	78141923	78156278	8.48681	8.88349	9.72093	9.84238	10.1649	9.90161	8.8105	9.02051	9.09805	9.18143
uc007kjb.1	Unc119	chr11	78157023	78162658	7.55393	7.82041	8.63167	8.82028	7.94251	7.92895	7.82569	8.10716	8.01093	8.02096
uc007kjg.2	Slc46a1	chr11	78279202	78285447	6.76827	7.03704	8.79132	8.80686	6.89482	7.02881	7.47886	7.70822	7.4518	7.23197
uc007kjn.1	Tmem199	chr11	78320556	78325670	8.91082	8.61737	8.399	8.48606	8.87344	8.86604	8.64451	8.80333	9.01093	8.86194
uc007kjo.1	Poldip2	chr11	78325797	78336238	7.58278	7.8523	8.28653	8.5028	9.17742	9.00798	7.31341	7.72413	8.38631	8.06411
uc007kjv.1	Tmem97	chr11	78355318	78364237	10.3248	10.3053	10.6162	10.7728	11.0444	10.9085	10.8405	10.9522	10.9297	10.8098
uc007kjw.1	Nlk	chr11	78380669	78510927	6.95957	6.90645	7.28653	6.85547	6.64386	6.3341	7.23669	6.7861	6.40848	6.96229
uc007kjz.1	Fam58b	chr11	78564007	78565231	7.46815	7.68532	8.1856	8.39929	8.06609	8.10488	7.57309	7.7354	8.24075	8.02643
uc007kkb.2	1810012P15Rik	chr11	78640096	78657401	6.87877	6.52642	6.98397	6.56789	7.30378	7.15204	7.27556	6.96896	6.96979	7.05612
uc007kkg.1	Ksr1	chr11	78828302	78959856	3.07141	4.03704	5.07708	4.87275	2.80735	2.05612	3.86543	3.57665	3.75136	3.9335
uc007kkl.1	Nf1	chr11	79153393	79395111	4.65637	4.58452	5.77752	6.09514	3.80735	3.90411	5.14923	5.34924	5.05092	5.06676
uc007kku.1	Rab11fip4	chr11	79404713	79507514	7.43463	7.56541	5.07708	4.56789	7.55459	7.751	8.00543	8.18316	7.66563	7.7672
uc007kkx.2	AB341556	chr11	79508390	79511515	7.01506	6.92156	4.66204	4.56789	7.24793	7.06511	7.39172	7.50738	7.27009	7.06676
uc007kky.1	AK078931	chr11	79595480	79596389	2.76107	2.65852	2.07708	0.480432	1.58496	2.90411	2.42933	3.36092	3.37285	3.30123
uc007kle.1	Cytor4	chr11	79876185	79894457	2.57665	3.65852	3.07708	3.65036	2.58496	2.31915	3.34187	2.93028	3.05092	3.22723
uc007klf.2	Atad5	chr11	79902901	79916496	2.92457	2.92156	3.66204	3.80236	3.45943	2.90411	3.6638	3.31361	3.05092	3.56426
uc007klr.1	BC055823	chr11	80022638	80023891	1.43914	2.3366	3.66204	2.80236	1.58496	2.73419	2.24876	2.10716	2.05092	2.88619
uc007klv.2	5730455P16Rik	chr11	80173993	80191517	6.88871	6.60338	6.88443	6.74722	6.75489	6.47566	6.82971	6.84967	6.65084	6.64464
uc007klw.2	Zfp207	chr11	80196780	80207785	4.07141	4.3366	3.07708	3.93986	4.64386	4.31915	5.24876	4.63554	4.75136	4.86194
uc007kmc.2	Zfp207	chr11	80196780	80219235	4.49226	4.50652	3.66204	4.56789	2.80735	2.90411	5.02837	4.05058	4.13839	4.53389
uc007kmd.1	Psmd11	chr11	80242116	80248040	4.89858	4.58452	4.66204	3.48043	4.39232	4.25775	5.49162	5.57665	5.18021	4.81219
uc007kmf.1	Psmd11	chr11	80242116	80285635	6.15064	6.16949	4.399	4.28779	5.90689	5.56708	6.13629	5.59655	5.37285	5.22723
uc007kmh.1	Myo1d	chr11	80295628	80593527	3.43914	4.50652	2.07708	0.480432	4.64386	5.01959	2.92683	2.99168	3.95781	3.37162
uc007kmj.1	Tmem98	chr11	80623916	80635535	6.28714	6.35896	9.4434	9.60714	6.37504	6.74542	5.05612	5.39541	6.09532	6.08783
uc007kmp.1	Ccl2	chr11	81849078	81850954	6.00596	5.65852	6.16454	5.48043	2.32193	2.90411	3.6638	3.45112	4.13839	4.53389
uc007kmq.2	Ccl7	chr11	81859213	81861025	5.22574	4.98045	2.07708	0.480432	3	3.19362	2.92683	3.05058	4.13839	3.56426
uc007kmx.2	Cct6b	chr11	82532749	82577790	3.43914	2.3366	3.66204	1.48043	1	1.73419	4.89646	4.94588	4.22085	3.9335
uc007kmy.1	Zfp830	chr11	82577846	82581124	8.35203	8.1245	6.83196	6.93986	7.04439	6.96301	8.21224	8.2817	7.84534	7.84039
uc007knf.1	Lig3	chr11	82602265	82614155	0.924571	1.3366	3.07708	2.48043	2.80735	2.05612	-0.0731664	-0.00831527	2.05092	2.9793
uc007knt.2	Nle1	chr11	82714269	82721897	8.59902	9.01959	8.05436	8.62509	9.71596	9.46041	8.56708	8.84759	9.17505	9.00859
uc007kom.2	AA465934	chr11	83105200	83108139	6.5181	6.42406	6.98397	6.72836	5	5.09174	6.46081	6.56659	6.24075	6.09824
uc007kor.1	Ap2b1	chr11	83116198	83158082	3.73193	4.42406	3.66204	2.80236	2.58496	2.90411	2.98573	3.49418	3.22085	3.73419
uc007kpj.1	Ccl9	chr11	83386418	83392138	3.20468	2.92156	3.07708	2.48043	2.58496	2.31915	2.24876	2.10716	2.85828	3.14923
uc007kpt.1	Heatr6	chr11	83567138	83587794	2.76107	3.3366	4.399	4.06539	4.16993	3.43463	3.8013	3.72865	4.29885	3.78666
uc007kpz.2	Ddx52	chr11	83755591	83776588	7.55601	6.96595	7.53651	7.46912	6.52356	6.96301	7.32486	7.14819	7.05092	7.25076
uc007kqf.1	Tada2a	chr11	83892421	83943070	8.52342	8.47615	6.72093	6.83798	7.08746	7.58594	9.18186	9.16495	8.15945	8.2647
uc007kql.1	Acaca	chr11	84008939	84215153	9.78433	9.69415	9.2669	9.18779	8.5812	9.12865	9.60338	9.71961	9.01959	9.43566
uc007kqm.1	Aatf	chr11	84236357	84327003	6.7967	6.56541	5.98397	5.00399	6.30378	6.3924	6.618	6.83717	6.00512	6.37162
uc007kqr.1	Mrm1	chr11	84626562	84633017	7.03608	7.10478	6.53651	6.43463	7.9542	7.85313	6.96758	7.13464	7.24075	7.34999
uc007kqs.2	Dhrs11	chr11	84634229	84642505	6.01203	6.14395	5.98397	5.60971	7.83289	7.54154	5.50174	5.94588	6.94574	6.31022
uc007kqx.1	DIF-3	chr11	84682381	84684281	3.57665	3.65852	3.66204	3.48043	3.32193	3.31915	4.12323	3.65465	3.63589	3.43873
uc007kra.2	Myo19	chr11	84693721	84706557	2.36514	2.65852	2.07708	3.80236	4.85798	4.82165	3.19985	3.76427	3.75136	3.67974
uc007krg.2	Car4	chr11	84771255	84779556	6.62897	6.79603	2.07708	0.480432	6.80735	7.06511	3.38627	3.31361	4.69478	4.73419
uc007krh.1	Usp32	chr11	84797989	84953457	6.69842	6.44512	6.66204	6.63018	4.90689	5.12651	5.8013	5.97658	5.72335	5.60866
uc007krj.1	Appbp2	chr11	85004811	85048622	9.42555	9.07469	8.16454	8.06539	7.60733	7.48908	9.26297	9.29013	8.44324	8.71739
uc007krk.2	D630032N06Rik	chr11	85048667	85051806	3.47477	4.58452	4.399	3.28779	2.32193	2.54154	3.34187	3.31361	2.63589	3.67974
uc007krm.1	Ppm1d	chr11	85124862	85128026	4.28714	4.79603	3.66204	3.06539	3	3.98212	4.24876	3.96131	3.51036	4.06676
uc007ksb.1	Tbx2	chr11	85646116	85655450	2.11722	2.65852	3.07708	3.06539	4.08746	3.82165	1.5118	2.31361	3.05092	3.30123
uc007ksf.2	Brip1	chr11	85871637	86014695	3.47477	3.65852	4.66204	4.06539	2.32193	3.64108	3.47115	4.28937	3.05092	3.50286
uc007ksg.1	4632419I22Rik	chr11	86014871	86024191	8.3592	8.10478	8.58487	8.36308	8.85487	8.63807	8.3091	8.22211	8.19048	7.99611
uc007ksi.1	Ints2	chr11	86024184	86070048	2.9752	3.14395	3.66204	2.80236	3.58496	2.05612	2.5118	2.31361	3.05092	2.67974
uc007ksj.1	Ints2	chr11	86024184	86071070	4.52661	4.03704	4.88443	4.38732	4.32193	4.48908	4.14923	4.45112	3.37285	4.02369
uc007ksk.1	Med13	chr11	86079216	86171027	7.88374	7.64948	8.12147	8.08776	6.58496	7.03797	8.10009	7.79689	7.49387	7.68666
uc007ksm.1	Rnft1	chr11	86298171	86312509	3.54348	1.92156	4.07708	4.06539	4.85798	4.31915	3.19985	4.13464	4.05092	3.62316
uc007ksn.2	Rps6kb1	chr11	86312512	86358309	6.1725	6.11796	6.98397	6.20835	5.75489	6.00098	6.28439	5.96896	5.63589	6.15921
uc007kso.2	Rps6kb1	chr11	86327484	86358309	4.34603	3.79603	3.07708	4.06539	4.75489	4.86347	4.34187	4.53601	4.13839	4.33685
uc007ksp.2	Rps6kb1	chr11	86331667	86358309	4.81766	4.65852	4.399	4.28779	5.12928	4.94364	4.88103	4.51525	5.33633	4.9793
uc007ksq.1	AK165329	chr11	86354392	86357433	4.2465	3.3366	3.07708	3.28779	4	3.98212	4.27261	3.96131	3.85828	4.43873
uc007ksv.1	Tmem49	chr11	86397366	86497324	8.32301	8.23141	8.1856	7.9067	8.50383	8.63506	8.503	8.3797	8.13839	8.29218
uc007kta.1	Cltc	chr11	86508154	86570994	7.69086	7.52642	7.28653	7.67026	6.02237	6.44843	7.18422	7.58912	6.85828	7.46312
uc007ktb.1	AK049578	chr11	86536779	86539985	3.95011	4.03704	4.399	3.93986	3.70044	3.98212	4.47115	4.02143	3.85828	3.67974
uc007ktc.1	Dhx40	chr11	86582350	86621162	8.19936	7.75445	6.93506	7.18087	6.49185	6.3341	7.79514	7.69212	6.92129	7.40975
uc007ktd.1	Ypel2	chr11	86749926	86807264	5.56843	5.24349	4.07708	4.28779	6.24793	7.28108	6.00721	5.55647	5.77884	5.79948
uc007kte.2	Gdpd1	chr11	86847295	86887639	5.60907	5.72891	8.399	8.35695	6.02237	5.88394	5.7765	5.8076	5.22085	4.95658
uc007ktg.1	1200011M11Rik	chr11	86891233	86900279	7.41413	7.03704	6.07708	5.97228	6.58496	6.80028	7.14277	7.20762	6.81911	7.02369
uc007kth.2	Prr11	chr11	86902657	86922216	7.60907	7.29079	7.43463	7.51385	7.69349	7.48238	7.5969	7.4039	7.0282	7.11885
uc007ktk.1	Fam33a	chr11	86922762	86938137	5.36514	4.92156	3.66204	5.18087	4	3.43463	5.33056	4.84967	4.13839	4.06676
uc007ktn.1	Trim37	chr11	87003575	87022037	1.28714	1.92156	3.66204	2.48043	1.58496	2.05612	3.29607	3.40672	3.05092	2.14923
uc007kto.1	Ppm1e	chr11	87040407	87172496	2.20468	1.92156	6.98397	7.13864	1.58496	3.19362	1.92683	1.72865	1.05092	1.30123
uc007kuc.1	Hsf5	chr11	87430665	87473044	4.73193	4.50652	2.07708	2.06539	3.45943	3.54154	4.17476	3.40672	3.22085	3.43873
uc007kud.1	Rnf43	chr11	87476223	87543436	2.50953	0.336596	4.88443	3.06539	2.32193	1.73419	-0.0731664	-0.00831527	0.0509239	0.564264
uc007kue.2	Rnf43	chr11	87476588	87549041	2.50953	2.3366	6.07708	5.06539	1	2.73419	1.14923	-0.593278	1.63589	1.30123
uc007kuk.1	Supt4h1	chr11	87551066	87557119	3.07141	1.92156	3.66204	2.06539	2.32193	2.31915	2.14923	2.31361	2.85828	2.43873
uc007kum.2	Bzrap1	chr11	87574042	87599430	3.07141	2.92156	5.247	4.06539	6.16993	5.59217	3.42933	3.2647	3.63589	3.50286
uc007kus.2	Lpo	chr11	87619929	87639616	-0.297822	0.336596	8.53651	8.51935	3.32193	3.19362	2.24876	1.40672	3.05092	3.30123
uc007kuu.1	Mks1	chr11	87666726	87677181	6.2465	6.03704	4.88443	5.56789	6.52356	6.68839	6.9529	7.18151	7.0282	6.92767
uc007kuv.1	Mks1	chr11	87667166	87672815	2.36514	1.92156	3.07708	2.80236	2.32193	2.05612	2.34187	2.21408	2.63589	2.56426
uc007kuw.1	Epx	chr11	87677499	87689038	2.02411	1.92156	2.07708	0.480432	2	2.31915	3.69942	2.72865	3.95781	3.73419
uc007kva.2	Dynll2	chr11	87793026	87801035	3.50953	4.3366	5.399	4.18087	4.80735	4.37804	4.86543	4.72865	4.63589	5.04539
uc007kve.1	AK040276	chr11	87872567	87880978	2.43914	1.92156	4.07708	2.48043	0	2.31915	2.6638	2.93028	0.0509239	0.979301
uc007kvf.1	Vezf1	chr11	87881842	87898231	7.43914	7.49647	8.69179	8.62509	7.44294	7.56074	7.56346	7.28937	6.92129	6.91594
uc007kvq.2	LOC100504473	chr11	88547267	88579581	2.81766	1.92156	3.07708	1.48043	2	2.05612	3.14923	3.72865	3.51036	3.14923
uc007kvr.2	LOC100504473	chr11	88572672	88579581	3.70218	2.92156	4.399	2.80236	2.32193	1.73419	3.04231	2.79904	3.22085	2.67974
uc007kvs.1	AK214167	chr11	88579958	88583914	3.16161	3.50652	3.07708	3.93986	2.80735	3.19362	3.09676	2.10716	3.22085	2.9793
uc007kvv.1	Akap1	chr11	88692105	88712817	0.439144	1.92156	3.66204	1.48043	1	2.54154	1.92683	2.31361	2.05092	2.43873
uc007kvx.2	Scpep1	chr11	88785333	88816756	4.9752	4.72891	2.07708	2.80236	4.32193	4.25775	5.17476	5.49418	4.69478	4.88619
uc007kvy.1	2210409E12Rik	chr11	88825980	88828231	5.61706	5.14395	2.07708	0.480432	2.32193	2.90411	6.38627	6.54115	6.07329	5.89816
uc007kvz.1	Coil	chr11	88831731	88843964	5.3746	4.92156	2.07708	0.480432	2.58496	1.73419	6.5118	6.38972	6.00512	6.06676
uc007kwa.1	Coil	chr11	88835177	88852927	7.97364	7.79603	5.88443	5.56789	7.25739	7.11789	8.83072	8.50607	8.2941	8.36732
uc007kwh.2	Nog	chr11	89161951	89163873	3.40262	1.3366	3.07708	2.48043	1.58496	3.82165	1.6638	1.86615	2.05092	2.14923
uc007kwu.2	Stxbp4	chr11	90337806	90499422	3.36514	3.92156	6.07708	6.18087	3.70044	2.90411	4.19985	3.65465	3.22085	3.30123
uc007kwz.1	Cox11	chr11	90499497	90507291	7.36039	7.49647	5.53651	5.68989	5.75489	5.61683	7.47886	7.13464	6.46031	6.69355
uc007kxk.1	Utp18	chr11	93720556	93747080	7.7356	7.42406	5.77752	5.18087	5.78136	6.17713	7.71908	7.30457	6.72335	6.7672
uc007kxl.1	Utp18	chr11	93728258	93747080	3.02411	3.3366	4.07708	2.06539	4.16993	3.82165	4.29607	3.72865	3.95781	4.43873
uc007kxs.1	Nme2	chr11	93811128	93817002	2.50953	3.14395	2.07708	0.480432	3.58496	3.43463	2.34187	2.65465	3.05092	2.9793
uc007kxt.1	Nme2	chr11	93811128	93817321	3.89858	3.14395	2.07708	3.28779	4.08746	3.73419	2.98573	3.76427	3.05092	3.9335
uc007kxu.1	Nme1	chr11	93820238	93829835	11.5866	11.4984	11.2987	11.4527	11.7859	11.6448	11.1466	11.2233	11.4672	11.4121
uc007kxw.1	JSAP2	chr11	93857404	93933974	1.57665	0.336596	3.66204	3.28779	2.32193	2.54154	3.09676	2.79904	2.63589	3.43873
uc007kyf.1	Tob1	chr11	94072767	94076806	7.42328	7.95131	8.14317	7.99613	7.44294	7.24989	7.22145	6.96514	7.54278	7.36732
uc007kyh.1	Luc7l3	chr11	94152452	94183225	4.84514	5.24349	5.399	4.87275	4.70044	5.09174	5.24876	4.83299	5.51036	5.35434
uc007kyk.1	Ankrd40	chr11	94189314	94200823	2.02411	1.3366	4.399	2.48043	1	1.31915	2.42933	1.72865	2.37285	0.979301
uc007kyl.1	Ankrd40	chr11	94189314	94203161	8.00139	8.00193	8.805	8.95617	8.18982	8.16882	8.22604	8.2205	8.01093	7.83728
uc007kzc.1	Acsf2	chr11	94418415	94463100	5.8721	6.31388	6.07708	6.45771	5.24793	5.12651	6.15565	6.65939	6.84534	6.63751
uc007kze.1	Lrrc59	chr11	94491137	94506530	11.9857	12.0603	11.3717	11.6721	12.6771	12.5694	12.1369	12.2648	12.3386	12.256
uc007kzf.1	Eme1	chr11	94506315	94515068	9.50038	9.59162	7.399	7.6996	8.89482	9.08734	9.40324	9.46809	9.43247	9.43873
uc007kzg.1	Mrpl27	chr11	94515104	94521401	8.08588	8.22534	8.07708	8.09514	8.15482	7.87885	7.7765	7.88043	8.01671	7.96514
uc007kzi.2	Xylt2	chr11	94525160	94538807	8.10874	8.49141	8.45212	8.93986	8.67243	8.60147	8.60514	8.89356	8.96381	8.67453
uc007kzn.1	Col1a1	chr11	94797583	94813170	7.49226	7.71164	3.07708	3.06539	10.3004	9.84663	7.81963	7.67116	8.70914	8.57176
uc007kzr.2	Ppp1r9b	chr11	94852525	94868212	6.41184	6.93651	9.68441	9.93576	9.18982	8.811	6.48142	6.80333	7.27009	7.29218
uc007kzs.2	Ppp1r9b	chr11	94857377	94868212	1.28714	0.336596	2.07708	3.48043	3	3.19362	-0.658129	0.72865	1.05092	2.30123
uc007kzt.1	Samd14	chr11	94871192	94887401	2.28714	2.65852	8.2669	8.35695	6.10852	5.86347	2.73419	2.31361	2.37285	2.67974
uc007kzu.2	Pdk2	chr11	94887571	94902685	4.36514	5.19458	7.12147	7.59937	6.84549	6.6767	4.42933	4.78176	5.44324	5.18875
uc007kzy.2	Dlx3	chr11	94981430	94986605	3.54348	3.79603	2.07708	0.480432	3.80735	3.73419	-0.0731664	1.21408	1.63589	-0.020699
uc007lag.2	Fam117a	chr11	95198331	95243186	7.8721	8.20696	5.399	5.9067	7.94837	7.96781	8.20296	8.32708	8.4303	8.33245
uc007lal.1	Nxph3	chr11	95371159	95375879	4.45707	4.65852	3.66204	2.80236	4.90689	4.68839	4.24876	4.18808	4.13839	3.88619
uc007lam.1	Ngfr	chr11	95430139	95449012	9.06704	9.43463	3.07708	3.80236	10.6662	10.4891	6.91173	7.03243	8.16467	7.9793
uc007lan.2	Phb	chr11	95528270	95542087	12.0654	12.1363	11.1324	11.1502	12.0731	12.032	11.8018	11.8814	12.4008	12.2896
uc007lap.1	Zfp652	chr11	95574321	95696429	1.43914	2.3366	2.07708	2.48043	3	2.73419	1.6638	0.991685	1.05092	-0.020699
uc007laq.1	Zfp652	chr11	95610313	95626027	6.55184	7.21924	6.325	5.93986	5.70044	6.01959	6.41869	6.23327	6.27974	6.57176
uc007lar.2	AB341654	chr11	95630629	95633172	7.13402	6.60338	5.77752	6.36307	5.2854	5.92401	6.19985	6.41235	5.93357	6.42224
uc007las.2	Phospho1	chr11	95685813	95693454	1.28714	1.3366	2.07708	1.48043	3.32193	3.43463	1.8013	2.65465	2.37285	1.78666
uc007law.1	AK133925	chr11	95720178	95730345	4.95011	4.58452	3.66204	4.38732	5.52356	5.68839	5.56104	5.90657	4.95781	5.47115
uc007lay.2	Igf2bp1	chr11	95818477	95867258	12.7868	12.8075	4.07708	2.80236	11.8234	11.7741	12.8333	12.7749	12.0396	12.1007
uc007lbb.1	Snf8	chr11	95896230	95908719	8.15751	8.0577	6.60064	7.43463	7.83289	7.99158	8.02487	8.02327	7.97574	8.04808
uc007lbd.1	Ube2z	chr11	95908749	95926678	10.9647	10.9768	9.94744	9.97229	11.0735	11.0425	10.8529	10.9642	10.9167	10.8287
uc007lbh.1	Calcoco2	chr11	95960639	95973276	8.65831	8.575	2.07708	0.480432	5.42626	5.19362	10.8993	10.8512	9.67298	9.70807
uc007lbk.1	Hoxb13	chr11	96055674	96057913	2.43914	3.79603	2.07708	0.480432	3.90689	3.90411	2.24876	2.79904	3.75136	3.83728
uc007lbm.1	AK078566	chr11	96113082	96124288	4.98758	4.79603	2.07708	0.480432	3.45943	3.05612	6.39172	6.40672	6.24075	6.25543
uc007lbr.1	Hoxb7	chr11	96147959	96151477	1.81766	3.14395	2.07708	0.480432	1.58496	2.54154	1.8013	1.99168	2.37285	1.56426
uc007lbt.1	Hoxb6	chr11	96160484	96162883	1.28714	2.65852	2.07708	0.480432	3	3.19362	-0.658129	-0.00831527	1.05092	1.30123
uc007lbv.2	Hoxb4	chr11	96179580	96182952	2.36514	2.3366	2.07708	0.480432	4.39232	4.19362	1.92683	0.72865	2.37285	0.979301
uc007lby.1	Hoxb2	chr11	96212945	96215328	2.43914	1.92156	3.07708	3.28779	6.65821	6.31915	1.14923	1.40672	2.05092	2.14923
uc007lck.1	Cbx1	chr11	96650449	96665283	5.32667	5.03704	3.07708	4.06539	3.90689	4.43463	5.75126	5.60639	5.29885	5.37162
uc007lcl.1	Cbx1	chr11	96650449	96669954	7.27961	7.06452	5.07708	5.23532	5.67243	5.71147	7.30477	7.20114	6.59008	6.43873
uc007lcn.1	X95399	chr11	96668693	96669461	9.35443	8.91403	6.16454	6.5028	7.76818	7.71147	9.67614	9.16244	8.7127	8.90856
uc007lct.1	AK132462	chr11	96698021	96704119	1.92457	2.3366	3.07708	3.06539	2.32193	1.73419	1.92683	2.10716	3.05092	0.564264
uc007lcu.1	Copz2	chr11	96711189	96722516	4.92457	4.86016	6.66204	5.87275	5.88264	5.66493	3.5118	4.10716	5.05092	5.10858
uc007lcx.1	AK188991	chr11	96777464	96777529	0.439144	1.3366	2.07708	1.48043	3	2.54154	0.341871	0.72865	3.05092	1.9793
uc007ldc.1	Pnpo	chr11	96799129	96805333	8.39915	8.51152	6.247	5.56789	9.75322	9.67963	8.53046	8.75656	9.20321	9.06941
uc007lde.2	D030028A08Rik	chr11	96805459	96826374	3.20468	1.92156	3.07708	2.06539	3.70044	3.43463	2.98573	1.21408	3.22085	3.56426
uc007ldj.1	AM295304	chr11	96881821	96887732	3.70218	3.3366	3.66204	4.18087	4.16993	4.43463	3.8013	3.21408	4.05092	3.9793
uc007ldk.2	Scrn2	chr11	96891265	96895274	6.92457	7.37002	7.83196	8.14577	8.58496	8.38524	7.02135	7.26159	7.95179	7.83417
uc007ldl.1	Lrrc46	chr11	96895915	96902683	3.02411	3.92156	5.66204	5.43463	3.45943	3.54154	3.38627	2.79904	2.85828	2.78666
uc007ldm.1	Mrpl10	chr11	96902899	96910527	10.12	10.1789	9.97189	10.0616	10.8353	10.7579	10.1359	10.336	10.3524	10.3275
uc007ldp.1	Osbpl7	chr11	96914737	96918679	2.70218	2.65852	3.66204	2.06539	2.58496	3.19362	3.47115	3.40672	2.85828	3.06676
uc007ldr.2	Tbx21	chr11	96959320	96976645	2.9752	3.14395	2.07708	1.48043	3.32193	2.31915	2.42933	2.99168	2.63589	2.56426
uc007ldv.1	Npepps	chr11	97067170	97141890	9.18196	8.92531	8.52002	8.67026	8.78136	8.75933	8.72233	8.68517	8.37285	8.67279
uc007ldx.2	Mrpl45	chr11	97177029	97191234	11.2353	11.0671	9.59278	9.82916	10.1699	10.222	10.9934	10.9931	10.8559	10.9782
uc007ldy.1	Gpr179	chr11	97193422	97213387	2.50953	2.3366	4.399	4.48043	2	1.73419	3.04231	3.36092	4.05092	3.06676
uc007lea.1	Socs7	chr11	97223864	97259856	8.76737	8.97684	8.34386	8.66034	9.04166	8.85572	8.69942	8.79797	8.73742	8.74583
uc007lec.1	Arhgap23	chr11	97311473	97363714	7.77899	7.95865	6.247	6.74722	9.35535	9.04707	7.23061	7.18808	7.92744	7.79308
uc007lee.1	Srcin1	chr11	97370653	97436440	3.89858	5.19458	2.07708	2.48043	6.14975	5.48908	4.60866	5.05058	5.09532	4.88619
uc007lef.1	AK010368	chr11	97459824	97484207	7.37224	7.37002	2.07708	0.480432	5.42626	5.75656	7.0867	7.18151	6.98166	6.99611
uc007leg.1	E130012A19Rik	chr11	97488700	97491030	11.0557	11.3673	7.03127	7.01959	11.6786	11.4075	10.7768	11.0827	10.8663	10.6619
uc007leh.1	AK155239	chr11	97506172	97521681	2.02411	2.92156	2.07708	0.480432	2	0.734188	2.42933	2.49418	3.05092	3.43873
uc007lei.1	Mllt6	chr11	97524725	97546772	7.31443	7.27911	7.43463	7.23532	9.02514	8.67963	8.17001	8.19462	8.43463	8.02369
uc007lek.2	Cisd3	chr11	97547265	97549939	6.70967	6.00902	4.66204	3.93986	8.16992	8.01496	6.55619	6.55138	6.95781	6.6658
uc007leo.1	Psmb3	chr11	97564747	97569378	4.8854	5.14395	4.66204	4.72836	4.90689	4.86347	5.69942	5.47281	5.29885	4.88619
uc007lep.1	Psmb3	chr11	97564747	97574814	10.5279	10.622	10.0078	10.1826	10.9557	10.9079	10.4458	10.6238	11.0601	10.8937
uc007leq.1	Pip4k2b	chr11	97576470	97606018	10.2584	10.37	10.52	10.4038	10.2396	10.238	10.4481	10.4718	10.2407	10.2099
uc007ler.2	Cwc25	chr11	97606783	97627927	8.28589	8.07806	6.72093	6.52483	7.13955	7.10923	8.18736	8.03426	7.7304	7.94797
uc007les.2	Cwc25	chr11	97617574	97627927	2.28714	2.3366	4.399	3.06539	1.58496	2.54154	2.14923	0.991685	2.85828	2.43873
uc007let.1	1700001P01Rik	chr11	97632794	97637232	3.28714	2.92156	4.07708	2.80236	2.80735	2.90411	3.04231	2.99168	3.75136	2.88619
uc007leu.2	Rpl23	chr11	97638839	97643753	11.1922	10.4294	9.69179	10.2436	9.5411	9.83485	10.8397	10.8517	10.3581	10.1954
uc007lev.1	Rpl23	chr11	97642647	97643571	6.22574	6.89118	6.53651	6.5028	7.03342	6.83222	6.43463	6.84135	6.76517	6.70722
uc007lew.1	Lasp1	chr11	97660985	97700078	12.048	12.2012	11.8185	11.8866	12.286	12.1743	11.8421	12.0243	12.1227	12.039
uc007lfb.1	Fbxo47	chr11	97715620	97745468	2.43914	2.92156	2.07708	2.48043	2.32193	2.05612	3.42933	3.36092	2.85828	2.56426
uc007lff.2	Cacnb1	chr11	97864214	97883941	1.57665	2.65852	2.07708	2.06539	4.24793	3.54154	1.5118	3.2647	3.63589	2.9793
uc007lfk.2	Rpl19	chr11	97888023	97891807	1.70218	2.3366	2.07708	0.480432	2.32193	-0.265812	1.8013	1.40672	2.05092	1.78666
uc007lfl.1	Stac2	chr11	97897937	97914776	4.74657	5.19458	2.07708	0.480432	3.45943	3.90411	4.31915	4.49418	4.57449	4.37162
uc007lfn.1	Fbxl20	chr11	97968539	98010930	2.50953	2.92156	3.07708	2.80236	2	2.05612	3.14923	2.10716	2.37285	2.30123
uc007lfo.1	Med1	chr11	98013468	98054607	5.54348	5.622	4.66204	5.33841	5.04439	5.09174	5.75972	5.25221	5.09532	4.59401
uc007lfp.1	Med1	chr11	98014974	98054220	0.439144	1.92156	2.07708	1.48043	2.32193	2.31915	1.92683	0.991685	2.85828	2.30123
uc007lfs.2	Cdk12	chr11	98064618	98108018	2.76107	2.3366	3.07708	0.480432	0	2.90411	3.5118	2.49418	2.37285	2.67974
uc007lfw.1	AK047916	chr11	98081714	98086836	4.65637	3.50652	3.66204	3.93986	4.52356	4.37804	5.55132	4.99168	4.57449	5.00167
uc007lgh.1	Pgap3	chr11	98249985	98261804	4.98758	5.14395	6.88443	7.32592	7.50779	7.46211	5.41869	5.52566	5.95781	6.17897
uc007lgi.1	Erbb2	chr11	98273797	98299030	6.85531	6.72891	8.48647	8.77964	9.61655	9.25383	7.09676	7.21408	7.13839	7.08259
uc007lgj.1	1810046J19Rik	chr11	98299021	98300302	8.18465	8.24349	8.63167	8.58372	8.86728	8.61683	7.80744	7.84759	8.16986	8.17652
uc007lgr.1	Ormdl3	chr11	98442607	98448559	8.55705	8.71597	9.0883	9.05408	8.7211	8.72854	8.1183	8.32559	8.96979	8.89219
uc007lgv.1	Gsdma	chr11	98525664	98539022	3.32667	1.92156	2.07708	0.480432	2	2.31915	2.5898	2.31361	3.51036	2.30123
uc007lgw.1	Psmd3	chr11	98543867	98553831	4.43914	4.58452	5.07708	5.60971	5.80735	5.05612	5.12323	4.99168	5.95781	5.45503
uc007lgx.1	Psmd3	chr11	98543867	98557292	9.45372	9.51899	9.50334	9.76814	10.9629	10.6847	9.61741	9.76757	10.1008	10.0786
uc007lhc.1	Med24	chr11	98570155	98590732	1.28714	1.92156	4.07708	2.48043	3.32193	2.05612	2.24876	1.57665	2.37285	2.43873
uc007lhe.1	Thra	chr11	98603186	98626425	2.92457	2.3366	6.60064	6.28779	4.80735	4.90411	3.42933	2.86615	3.95781	3.14923
uc007lhf.1	Thra	chr11	98603186	98630320	3.70218	4.3366	8.55281	8.33218	6.6865	6.43463	4.09676	5.20114	5.60551	5.56426
uc007lhh.1	Nr1d1	chr11	98629248	98636556	5.68707	5.92156	7.805	7.55725	6.55459	6.37804	4.64565	4.94588	5.33633	5.42224
uc007lhr.1	Rapgefl1	chr11	98698098	98714319	2.9752	2.65852	4.07708	3.93986	5.42626	4.43463	2.04231	2.21408	2.63589	2.67974
uc007lht.2	Wipf2	chr11	98724911	98766892	8.0226	8.15038	8.247	8.05029	8.3443	8.53185	8.07489	7.93028	7.85828	7.83105
uc007lhv.1	cdc6	chr11	98769202	98785256	3.02411	1.92156	3.66204	2.06539	2.80735	2.54154	3.55132	3.2647	2.85828	2.67974
uc007lhz.2	Rara	chr11	98821784	98836256	4.74657	5.19458	2.07708	3.80236	6.59991	5.88394	4.55132	5.30154	5.72335	5.40557
uc007lia.1	Rara	chr11	98826185	98836256	2.50953	2.92156	2.07708	0.480432	2	3.43463	1.92683	2.10716	3.05092	2.30123
uc007lic.1	Top2a	chr11	98854260	98871913	2.20468	2.3366	3.66204	3.28779	2.58496	3.98212	3.19985	2.40672	3.63589	2.78666
uc007lid.1	Top2a	chr11	98854260	98885503	8.62501	8.20078	8.52002	8.64534	7.22882	7.67083	8.54766	8.35655	8.39965	8.44078
uc007lie.1	Igfbp4	chr11	98902573	98913957	7.78433	7.86016	12.1445	12.237	7.78136	7.79488	5.48142	5.89858	5.80581	5.65173
uc007lii.1	Smarce1	chr11	99070361	99092331	8.42896	8.30814	8.64693	8.55725	8.49185	8.23801	8.50174	8.53214	8.2108	8.15173
uc007lir.1	Krt10	chr11	99246568	99250678	3.70218	3.3366	3.07708	3.80236	2	2.90411	2.6638	2.10716	2.37285	1.9793
uc007lis.1	Krt12	chr11	99276977	99283573	0.702178	2.65852	2.07708	0.480432	2.80735	3.19362	1.14923	1.21408	2.37285	0.564264
uc007liu.1	Krt20	chr11	99289716	99299467	3.16161	3.3366	2.07708	0.480432	4.16993	4.12651	1.5118	-0.593278	2.37285	2.14923
uc007lkj.1	Krt13	chr11	99978909	99982809	4.07141	4.42406	2.07708	0.480432	8.87344	8.75656	1.14923	2.31361	4.69478	4.83728
uc007lkm.1	Krt19	chr11	100002125	100007233	7.10021	7.52642	2.07708	0.480432	10.1599	10.282	3.24876	3.40672	5.69478	6.09824
uc007lks.1	Krt17	chr11	100117530	100122303	7.60103	7.90645	2.07708	0.480432	4.75489	4.19362	6.74275	6.90258	6.37285	6.51068
uc007lku.1	Krt42	chr11	100124195	100131185	6.59295	7.19458	2.07708	0.480432	2	1.73419	5.30766	5.50475	5.13839	4.37162
uc007lkv.1	Eif1	chr11	100181309	100183410	10.258	10.2023	9.09944	9.19124	9.95855	9.7496	10.1371	10.0676	10.0124	9.83417
uc007lkw.2	Gast	chr11	100195725	100198310	3.36514	3.79603	2.07708	0.480432	3.45943	3.54154	1.6638	-1.59328	3.22085	2.14923
uc007lkx.2	Hap1	chr11	100208640	100217455	5.65637	5.24349	5.247	5.12429	5.04439	5.12651	6.42402	6.45657	5.37285	5.50286
uc007lkz.1	Jup	chr11	100231932	100259053	9.60606	9.93651	7.247	7.23532	10.42	10.222	9.66886	9.95313	10.2108	10.1592
uc007lla.1	Leprel4	chr11	100270063	100276133	7.54558	7.77954	7.7495	8.31332	10.8431	10.725	6.64108	6.92636	8.59008	8.57176
uc007llg.1	Nt5c3l	chr11	100300866	100302496	3.47477	3.14395	3.07708	3.06539	2.80735	3.05612	3.83372	2.49418	4.05092	3.50286
uc007lli.1	Klhl10	chr11	100303237	100318338	1.92457	3.50652	3.66204	1.48043	2	2.31915	3.04231	3.40672	4.44324	3.50286
uc007llj.1	Klhl11	chr11	100323925	100334096	8.21261	8.0231	6.93506	6.54652	5.70044	6.55437	7.94178	7.83717	6.99344	7.23197
uc007lls.1	Dnajc7	chr11	100444149	100481482	8.5643	8.55576	7.805	7.9067	6.9542	7.07404	8.32771	8.1089	7.80581	8.04539
uc007llt.1	Nkiras2	chr11	100481597	100488916	0.702178	2.92156	3.07708	3.48043	2.32193	3.31915	1.92683	1.21408	3.63589	2.9793
uc007llx.1	Dhx58	chr11	100556197	100565585	3.6718	3.65852	3.07708	2.48043	2.58496	1.73419	3.09676	2.86615	2.63589	2.43873
uc007lmf.2	Kcnh4	chr11	100601691	100621092	2.70218	3.14395	2.07708	2.06539	2.58496	2.54154	3.19985	3.16161	3.22085	3.88619
uc007lmh.1	Ghdc	chr11	100627645	100632271	6.7967	7.10478	6.93506	7.28779	7.55459	7.61683	6.76394	6.99544	7.33633	7.05612
uc007lmr.1	Ptrf	chr11	100818050	100831931	9.96231	9.89118	10.399	10.6123	11.7781	11.6931	8.33764	8.36672	9.47928	9.29105
uc007lms.1	Ptrf	chr11	100824084	100831931	3.60907	3.65852	3.66204	3.28779	5.61471	5.40661	0.663799	0.406722	3.22085	2.9793
uc007lnb.1	Hsd17b1	chr11	100939724	100941819	3.92457	4.03704	2.07708	3.93986	2.32193	3.82165	2.34187	2.21408	3.51036	2.9793
uc007lnd.1	Coasy	chr11	100943938	100947933	2.70218	1.92156	4.07708	3.28779	4.64386	4.86347	3.47115	2.99168	3.95781	4.02369
uc007lnk.1	Tubg1	chr11	100981444	100987733	8.98912	9.34503	10.252	10.2862	10.2503	10.1404	9.10093	9.30532	9.24814	9.31804
uc007lob.1	Vps25	chr11	101114917	101119361	0.924571	1.92156	2.07708	3.48043	2.32193	1.31915	0.341871	0.406722	2.63589	2.43873
uc007log.1	Ccdc56	chr11	101139283	101140262	8.68707	8.81233	9.399	9.33841	9.17991	9.09832	8.46081	8.79689	8.9182	8.67453
uc007lol.1	Becn1	chr11	101149580	101163581	4.16161	2.65852	3.07708	3.93986	4.08746	3.73419	3.47115	3.93028	3.85828	3.88619
uc007lon.1	Psme3	chr11	101177564	101184844	11.2646	11.1734	10.6278	10.6603	11.3537	11.3658	11.2803	11.3826	11.1177	11.0329
uc007loo.1	Aoc2	chr11	101186376	101191008	4.0945	4.72891	5.77752	5.00399	5.04439	4.90411	4.24876	4.67351	4.63589	4.67974
uc007los.1	Aarsd1	chr11	101268153	101278747	9.31689	9.42671	9.805	9.91506	10.1228	10.0617	9.8669	10.0131	10.1776	10.0434
uc007lov.2	Rundc1	chr11	101286398	101296979	7.1967	7.42406	8.00781	7.83798	7.48382	7.06511	6.78895	6.80333	7.15945	7.15423
uc007low.2	Rpl27	chr11	101303558	101306910	12.5774	12.698	12.6278	12.7188	13.1098	13.0272	12.45	12.6566	13.1106	12.967
uc007lox.1	Ifi35	chr11	101309725	101320015	5.43914	5.29079	5.07708	3.80236	7.7879	7.69997	5.23669	5.54627	7.15945	6.88619
uc007loy.1	Vat1	chr11	101318223	101327513	0.702178	1.92156	2.07708	2.06539	3.70044	2.90411	0.926834	1.99168	2.05092	1.9793
uc007lpa.1	Rnd2	chr11	101326353	101332620	3.2465	3.3366	2.07708	2.06539	4.80735	4.37804	2.73419	2.79904	3.95781	3.50286
uc007lpf.1	Brca1	chr11	101357633	101369541	2.92457	3.50652	2.07708	1.48043	3	1.31915	3.92683	3.05058	3.22085	3.14923
uc007lpo.1	BC048585	chr11	101472013	101477270	2.43914	3.14395	2.07708	0.480432	4.58496	3.73419	1.5118	2.10716	1.05092	1.56426
uc007lpp.1	Rdm1	chr11	101489262	101497395	7.86876	8.08479	6.60064	7.10979	8.55075	8.56074	8.15565	8.29242	8.18535	8.47516
uc007lpq.2	Arl4d	chr11	101526854	101529146	6.66025	6.3366	5.77752	5.76583	7.49985	7.57968	7.20915	7.46471	6.96979	7.09824
uc007lpr.1	Dhx8	chr11	101594269	101628671	10.956	10.9234	8.1856	8.52483	10.021	9.99158	10.6742	10.7275	10.2773	10.4786
uc007lps.1	Etv4	chr11	101631055	101645661	2.11722	2.3366	2.07708	1.48043	2.58496	1.31915	0.663799	2.40672	2.05092	1.56426
uc007lpv.1	Etv4	chr11	101634437	101646624	4.50953	4.24349	4.07708	3.28779	3	3.43463	4.75126	4.63554	3.95781	3.30123
uc007lpw.1	Etv4	chr11	101635716	101646162	4.52661	5.19458	4.88443	5.68989	4.52356	4.77858	5.64565	5.88246	6.00512	5.76066
uc007lpx.1	Meox1	chr11	101738823	101755668	3.78964	3.3366	3.07708	2.06539	3.16992	3.82165	1.92683	2.21408	3.05092	3.14923
uc007lqa.2	Dusp3	chr11	101832457	101846105	8.64762	8.622	9.325	9.34462	8.33539	8.31915	7.65702	7.60885	7.97574	8.18632
uc007lqe.1	Mpp3	chr11	101882415	101888269	3.11722	2.92156	5.07708	3.93986	3.16992	3.31915	2.42933	1.99168	2.05092	1.78666
uc007lqr.2	Tmem101	chr11	102013860	102017721	7.9783	8.05084	9.43463	9.533	8.77149	8.52535	8.01076	7.88448	8.33169	8.13665
uc007lqs.1	Lsm12	chr11	102024802	102046570	9.56482	9.42406	9.50334	8.9067	9.69349	9.62445	9.85511	9.70249	9.393	9.36409
uc007lqt.1	G6pc3	chr11	102051012	102055396	6.54767	6.60338	8.60064	8.66034	9.30378	9.01496	6.72989	6.95362	7.7304	7.51458
uc007lqw.1	Hdac5	chr11	102057060	102091486	1.28714	3.14395	6.53651	6.00399	4.64386	4.25775	1.14923	1.86615	2.37285	3.06676
uc007lra.1	Asb16	chr11	102130136	102139375	3.2465	3.79603	2.07708	0.480432	2	1.73419	4.0143	4.36092	3.75136	3.22723
uc007lrd.1	Tmub2	chr11	102146590	102150738	4.20468	4.3366	4.399	4.80236	4.16993	4.48908	3.38627	2.65465	3.05092	3.78666
uc007lri.1	Ubtf	chr11	102165873	102174807	5.95011	5.92156	6.07708	6.52483	7.05528	6.88394	6.74701	6.75545	6.96979	7.14923
uc007lrn.1	Ubtf	chr11	102170207	102178968	2.02411	2.92156	3.07708	3.65036	2.80735	2.90411	2.92683	3.16161	3.05092	2.14923
uc007lro.1	Ubtf	chr11	102174922	102178019	4.13958	4.58452	5.07708	3.80236	4.9542	5.05612	5.09676	4.96131	4.80581	5.24609
uc007lrt.2	Slc25a39	chr11	102264294	102268831	10.4196	10.7639	11.5159	11.6733	11.6225	11.5135	10.8377	11.076	11.5073	11.304
uc007lrv.2	Grn	chr11	102291635	102298123	9.64225	9.77331	9.5117	9.5028	9.97011	9.70717	8.58742	8.67468	9.38184	9.22604
uc007lrw.1	Fam171a2	chr11	102298295	102308977	5.2465	5.38099	9.95359	10.1964	8.12928	8.05612	5.38627	5.77304	6.57449	6.08783
uc007lsd.1	AK144330	chr11	102437712	102440433	5.94376	5.82845	2.07708	0.480432	2.32193	3.82165	6.53663	6.33746	5.66563	5.77372
uc007lsg.1	Ccdc43	chr11	102546001	102559039	9.28902	9.09815	7.16454	7.45771	8.00562	7.98685	10.1668	9.94005	9.12774	9.16541
uc007lsh.1	Ccdc43	chr11	102549632	102550173	3.99986	3.65852	4.399	4.38732	3	2.73419	4.55132	4.57665	4.63589	4.30123
uc007lsr.2	mKIAA0031	chr11	102727175	102732499	4.22574	4.98045	4.88443	4.38732	4.90689	5.05612	4.84967	4.88246	5.18021	4.47115
uc007lst.1	Ccdc103	chr11	102742557	102746529	4.2465	4.65852	5.07708	4.56789	3.32193	2.90411	3.55132	3.49418	4.44324	3.37162
uc007lsy.2	Kif18b	chr11	102766832	102786438	10.2358	10.4542	10.0771	10.3149	10.5897	10.3406	10.0332	10.2798	10.5175	10.4326
uc007lsz.2	C1ql1	chr11	102800577	102807775	4.64078	5.19458	4.66204	5.65036	6.80735	6.54154	3.8013	4.51525	3.37285	4.06676
uc007ltc.1	Dcakd	chr11	102855369	102878461	7.84343	8.25546	8.247	8.46343	9.05799	8.86862	8.08839	8.34189	8.46031	8.44691
uc007ltd.1	Nmt1	chr11	102889875	102927419	10.8109	10.8103	9.69913	9.66778	10.3309	10.2792	10.7518	10.7593	10.8208	10.8922
uc007ltf.2	Plcd3	chr11	102931609	102962972	4.34603	4.92156	3.07708	3.06539	7.87652	7.70573	4.0143	4.83299	4.90891	5.53389
uc007ltg.1	Plcd3	chr11	102936170	102940983	3.70218	3.65852	2.07708	1.48043	5.97728	5.88394	3.5118	4.16161	3.95781	4.59401
uc007lto.1	Hexim1	chr11	102977638	102981038	9.87252	9.94022	9.399	9.14221	9.22882	8.8991	9.39376	9.41865	9.66563	9.60684
uc007lty.1	1700023F06Rik	chr11	103060259	103062789	1.92457	3.79603	2.07708	0.480432	2.32193	2.05612	0.926834	1.99168	1.05092	0.564264
uc007lua.1	Map3k14	chr11	103081077	103128715	4.56016	5.14395	5.07708	5.38732	4.45943	4.90411	4.36424	4.57665	5.09532	5.42224
uc007lud.1	Arhgap27	chr11	103192813	103206016	2.50953	2.92156	2.07708	0.480432	5.12928	4.43463	2.04231	2.21408	3.22085	2.56426
uc007lue.1	AK052773	chr11	103217014	103222406	1.81766	2.92156	2.07708	2.06539	3	3.19362	2.5898	2.10716	3.22085	3.06676
uc007luf.1	Sh3d20	chr11	103221050	103224698	2.57665	3.79603	2.07708	2.48043	5.93074	5.12651	3.04231	3.69212	3.22085	4.10858
uc007lug.1	Plekhm1	chr11	103226405	103273978	9.14443	9.42406	7.98397	7.95617	9.14975	9.04025	8.90029	9.02235	9.33864	9.31692
uc007lvo.2	Gosr2	chr11	103538162	103559024	10.0837	10.1261	9.82527	10.1458	10.0126	9.92525	10.2435	10.1749	10.3536	10.1567
uc007lvs.2	Wnt3	chr11	103635488	103679335	4.81766	4.92156	2.07708	2.48043	6.02237	6.16045	0.926834	0.406722	3.37285	3.06676
uc007lvt.1	Nsf	chr11	103683096	103815370	9.56482	9.45554	7.72093	7.78421	8.49185	8.60763	10.2215	10.2951	9.52057	9.58014
uc007lvy.1	Arf2	chr11	103828184	103846650	0.117216	2.65852	3.07708	2.06539	2	2.31915	1.14923	2.10716	2.85828	2.56426
uc007lwk.1	1700081L11Rik	chr11	104194542	104330175	2.50953	2.65852	3.66204	2.80236	1	1.73419	2.42933	1.57665	2.37285	2.43873
uc007lwl.1	mKIAA1267	chr11	104204239	104204987	1.70218	3.14395	2.07708	2.06539	3.45943	2.31915	1.8013	2.40672	2.37285	2.78666
uc007lwp.1	1700081L11Rik	chr11	104282373	104304020	0.702178	2.92156	4.07708	3.06539	3	2.73419	2.8013	1.86615	1.63589	2.67974
uc007lxa.2	Mettl2	chr11	104987738	105002460	9.29588	9.09482	7.53651	7.32592	8.49985	8.66788	9.36007	9.37539	8.9905	9.03458
uc007lxc.2	1700052K11Rik	chr11	105040334	105042747	5.5181	5.42406	6.88443	7.15286	6.55459	6.66493	5.94178	5.51525	6.46031	6.12905
uc007lxi.1	Mrc2	chr11	105153959	105212459	4.59295	4.72891	5.88443	6.15286	7.75489	7.59837	4.4504	4.63554	5.33633	5.16913
uc007lxm.1	Tanc2	chr11	105451299	105790617	3.2465	3.79603	5.53651	4.56789	4.32193	4.59217	2.86543	3.10716	3.05092	3.22723
uc007lxq.1	Tanc2	chr11	105763296	105777352	4.36514	3.50652	2.07708	3.48043	4.80735	4.31915	4.69942	4.57665	5.22085	3.83728
uc007lxz.1	Dcaf7	chr11	105898185	105920637	10.0413	10.0266	10.3059	10.6899	10.5784	10.4748	10.0271	10.1041	10.1062	10.3141
uc007lyb.1	Taco1	chr11	105927420	105934926	6.70218	6.48634	7.03127	7.06539	7.03342	7.05612	6.98573	6.95362	6.90891	6.58663
uc007lyc.1	Map3k3	chr11	105946215	106016748	9.56275	9.65175	7.85844	8.41117	9.61102	9.78811	9.38353	9.618	9.54478	9.48809
uc007lyi.1	Ccdc47	chr11	106060669	106077681	5.1725	4.98045	4.88443	4.87275	3.70044	4.25775	4.60866	4.78176	3.51036	4.81219
uc007lym.1	Ftsj3	chr11	106110457	106117116	10.9149	10.8893	8.41693	8.79331	9.08746	9.22804	10.8767	10.8314	10.0912	10.5175
uc007lyn.1	Psmc5	chr11	106117498	106124426	11.2387	11.2813	10.3203	10.3322	10.7805	10.7969	11.2024	11.3271	11.1956	11.2572
uc007lyp.2	Smarcd2	chr11	106124484	106134286	4.80372	5.29079	4.07708	4.28779	6.02237	5.92401	4.89646	5.28937	5.51036	5.22723
uc007lyt.2	Cd79b	chr11	106172654	106175843	3.57665	3.92156	2.07708	0.480432	1.58496	3.90411	4.22451	4.55647	5.33633	4.91004
uc007lzn.2	MtPolB	chr11	106629517	106640851	2.11722	2.3366	2.07708	0.480432	2.32193	1.73419	2.24876	1.72865	2.05092	1.30123
uc007lzr.1	Ddx5	chr11	106641669	106650179	1.81766	3.14395	2.07708	3.48043	2.58496	1.73419	0.926834	1.57665	1.05092	1.30123
uc007lzs.1	Ddx5	chr11	106644758	106649808	7.009	6.54605	6.93506	7.23532	7.52356	7.20992	7.39986	7.18151	7.09532	7.08259
uc007lzt.1	BC058545	chr11	106649951	106651519	4.6718	4.98045	5.88443	5.00399	5.24793	5.59217	4.57069	4.81611	5.00512	5.02369
uc007lzx.2	Smurf2	chr11	106681377	106782029	7.56636	7.50652	6.83196	6.67026	5.67243	5.90411	7.64108	7.49948	6.13839	6.41393
uc007mab.2	1810010H24Rik	chr11	106889536	106891756	4.32667	4.65852	5.66204	5.83798	3.16992	4.05612	4.04231	3.72865	3.95781	3.06676
uc007mac.1	Bptf	chr11	106894394	106993236	2.36514	3.3366	5.07708	2.80236	2.80735	2.31915	2.98573	1.99168	3.05092	1.9793
uc007mad.1	Bptf	chr11	106896710	106908657	3.28714	2.3366	3.07708	3.65036	2.58496	2.05612	3.19985	3.31361	3.22085	2.56426
uc007mah.2	Nol11	chr11	107027659	107050695	3.99986	3.50652	3.07708	3.80236	3	3.19362	3.86543	3.49418	3.05092	3.22723
uc007man.1	Pitpnc1	chr11	107083386	107332034	4.0945	3.92156	4.88443	4.06539	3	3.05612	4.27261	4.72865	3.85828	3.9335
uc007maq.1	AK146139	chr11	107289589	107297000	2.20468	2.92156	2.07708	0.480432	2.32193	1.31915	3.29607	3.45112	3.85828	3.37162
uc007mar.1	Psmd12	chr11	107340841	107359350	10.1073	9.74811	8.87149	8.4288	8.50383	8.57968	9.90364	9.80547	9.32472	9.40975
uc007maz.1	Cacng4	chr11	107596093	107655778	0.702178	1.92156	6.60064	6.98823	1	0.734188	1.6638	1.40672	2.05092	1.78666
uc007mba.1	AK048292	chr11	107655179	107657296	-0.882784	0.336596	5.399	4.06539	2	1.73419	0.341871	-0.00831527	1.05092	1.30123
uc007mbu.2	Axin2	chr11	108781662	108812095	5.72455	5.79603	7.03127	7.44622	5.70044	5.73419	5.6906	6.02143	5.13839	5.14923
uc007mby.2	Rgs9	chr11	109091169	109159495	1.81766	2.3366	2.07708	3.06539	1	1.31915	3.24876	1.99168	3.95781	2.9793
uc007mcc.1	Gm11696	chr11	109216091	109224968	3.16161	3.14395	3.66204	2.80236	2.58496	1.73419	2.5118	3.40672	4.13839	2.78666
uc007mcd.1	Gna13	chr11	109224107	109241788	3.64078	3.92156	4.399	4.06539	3.45943	3.54154	3.24876	4.10716	4.63589	4.18875
uc007mce.1	Gna13	chr11	109224107	109262683	9.1987	9.08479	8.56893	8.73782	6.78136	7.08292	8.8556	8.71733	8.2555	8.57921
uc007mcg.1	Amz2	chr11	109287259	109292359	2.81766	3.14395	4.07708	3.65036	1	2.05612	2.92683	1.86615	2.63589	3.14923
uc007mcj.1	Amz2	chr11	109287539	109299462	2.8721	3.3366	5.247	4.93986	4	4.19362	3.95658	3.45112	3.85828	3.56426
uc007mcn.1	Arsg	chr11	109334687	109434643	1.28714	2.92156	3.66204	3.06539	3.45943	3.82165	3.14923	2.57665	3.22085	3.14923
uc007mcq.1	Wipi1	chr11	109434834	109472703	2.11722	2.92156	2.07708	2.06539	2.58496	3.05612	2.73419	2.21408	2.63589	2.56426
uc007mcr.1	Wipi1	chr11	109437529	109472703	1.57665	2.3366	3.66204	2.06539	2.58496	2.54154	1.8013	1.72865	2.63589	2.14923
uc007mct.1	Prkar1a	chr11	109511821	109530962	0.702178	1.3366	4.07708	2.48043	2.58496	1.31915	0.926834	-1.59328	1.05092	0.979301
uc007mcu.1	Prkar1a	chr11	109512262	109530962	2.36514	2.65852	3.66204	3.65036	1.58496	1.73419	1.5118	2.65465	2.63589	1.30123
uc007mdw.2	Kcnj2	chr11	110927477	110938139	2.11722	2.92156	4.07708	4.80236	2.80735	2.31915	0.926834	1.40672	2.05092	2.67974
uc007met.1	D11Wsu99e	chr11	113522632	113545236	0.439144	2.65852	2.07708	1.48043	2.32193	2.05612	2.14923	1.40672	2.37285	1.56426
uc007meu.1	D11Wsu99e	chr11	113522632	113545465	3.07141	2.3366	2.07708	2.06539	3	3.90411	3.29607	3.21408	3.05092	3.22723
uc007mew.1	D11Wsu47e	chr11	113545719	113587781	4.02411	3.3366	2.07708	3.80236	3.80735	3.43463	3.62727	4.05058	4.05092	4.10858
uc007mex.1	D11Wsu47e	chr11	113545725	113555961	3.40262	3.50652	3.07708	3.80236	4	3.73419	4.27261	4.13464	3.95781	4.2647
uc007mfb.2	Cdc42ep4	chr11	113588163	113612474	2.64078	1.92156	2.07708	2.06539	3.16992	1.73419	1.6638	2.10716	2.37285	2.67974
uc007mfc.2	Cdc42ep4	chr11	113588163	113613129	2.50953	2.3366	3.66204	3.06539	0	2.05612	1.8013	1.86615	3.22085	1.9793
uc007mfm.1	Ttyh2	chr11	114536781	114582298	1.70218	1.92156	2.07708	3.93986	2.58496	2.54154	0.663799	2.10716	3.22085	0.979301
uc007mfn.1	Dnaic2	chr11	114588725	114619200	2.57665	3.14395	2.07708	1.48043	1.58496	2.90411	3.14923	2.99168	3.05092	2.88619
uc007mfq.1	Kif19a	chr11	114626702	114651889	1.70218	2.3366	3.07708	3.06539	1.58496	1.73419	2.5118	1.57665	2.05092	2.9793
uc007mfw.2	Gprc5c	chr11	114712845	114733931	6.27203	6.11796	2.07708	2.06539	7.35755	7.30404	6.00008	6.2205	6.90891	6.63751
uc007mgp.1	Slc9a3r1	chr11	115024654	115042492	7.89858	8.00902	8.28653	8.55725	8.15987	8.218	7.50678	7.77523	8.11701	8.00444
uc007mgy.1	Fdxr	chr11	115129338	115138283	7.34844	7.71164	8.36248	8.63525	7.92481	7.86861	7.18736	7.71278	8.26524	8.12905
uc007mgz.2	Fads6	chr11	115144679	115158860	3.73193	3.65852	3.66204	3.06539	3	2.31915	4.04231	4.69212	4.05092	4.02369
uc007mha.1	BC050213	chr11	115156311	115158978	2.64078	3.14395	3.07708	2.06539	2	2.05612	3.09676	3.16161	4.44324	3.06676
uc007mhi.1	Cdr2l	chr11	115243229	115257446	7.45037	7.61272	11.753	11.9966	10.2586	10.0685	8.3849	8.63674	8.49801	8.39926
uc007mhm.1	Atp5h	chr11	115277010	115281233	11.2314	11.1969	11.0827	11.0813	10.4778	10.5984	10.7618	10.8641	10.9518	10.8342
uc007mhn.2	Kctd2	chr11	115281439	115292588	7.54558	7.26733	7.7495	7.93986	7.58496	7.9141	7.52178	7.67351	7.64338	7.49894
uc007mht.1	Armc7	chr11	115336990	115351780	5.96271	6.09148	5.07708	5.23532	5.9542	6.40661	5.70819	5.9381	6.15945	6.495
uc007mhu.1	Nt5c	chr11	115351739	115353128	8.27835	8.55576	10.0429	10.2519	9.09276	8.819	7.72773	7.8641	8.47299	8.19119
uc007mhv.1	Hn1	chr11	115358666	115375684	10.8246	10.8052	11.6412	11.8674	11.8708	11.7527	10.7877	11.0131	11.42	11.3183
uc007mhw.1	Sumo2	chr11	115384422	115397544	12.5693	12.6203	10.7317	10.8203	10.8834	11.0539	12.548	12.3509	11.9431	11.8417
uc007mhx.2	Nup85	chr11	115425757	115445238	11.1872	11.0483	9.83863	10.0389	11.1319	11.1125	11.1656	11.3185	11.1614	11.1392
uc007mia.1	Mrps7	chr11	115465464	115468938	9.91447	10.0108	9.91628	10.1947	10.6257	10.5123	10.0817	10.3267	10.4719	10.3269
uc007mib.1	Mif4gd	chr11	115469232	115473817	4.20468	4.98045	4.399	4.18087	4.58496	4.43463	4.69942	4.81611	5.37285	4.47115
uc007mig.1	Slc25a19	chr11	115476296	115489453	4.49226	4.03704	3.07708	4.18087	4.08746	4.31915	3.86543	4.45112	4.13839	3.83728
uc007mil.1	2310067B10Rik	chr11	115626746	115660347	6.01203	6.03704	8.28653	8.65036	7.40939	7.28108	5.84172	6.25221	5.90891	6.28308
uc007mip.1	Caskin2	chr11	115660665	115674906	7.54767	8.11138	8.805	9.17392	9.06878	8.59837	7.56587	7.93615	8.28933	8.05612
uc007mis.1	Tsen54	chr11	115681692	115684317	1.81766	1.92156	2.07708	2.48043	2.58496	1.73419	2.34187	2.65465	1.63589	1.56426
uc007miu.1	Myo15b	chr11	115741550	115748759	2.8721	2.65852	2.07708	0.480432	1.58496	2.73419	2.86543	3.21408	3.05092	3.73419
uc007miw.1	Myo15b	chr11	115748878	115753918	1.81766	3.3366	2.07708	0.480432	2.32193	1.73419	3.29607	3.2647	3.95781	3.37162
uc007miy.1	Recql5	chr11	115753990	115794320	2.28714	1.3366	2.07708	3.28779	3.16992	2.31915	1.34187	1.57665	2.37285	1.9793
uc007miz.1	Recql5	chr11	115757578	115794320	2.11722	2.92156	2.07708	3.06539	2.80735	3.54154	2.04231	1.57665	2.37285	1.9793
uc007mjd.1	Sap30bp	chr11	115794972	115826848	10.0309	10.1229	9.14317	9.3813	9.63481	9.71147	9.94039	10.0374	10.2383	10.1473
uc007mjn.1	Galk1	chr11	115869670	115874033	9.74292	9.8931	10.0078	10.0803	11.7499	11.603	9.96484	10.2289	10.7907	10.6776
uc007mjo.1	H3f3b	chr11	115883274	115885818	12.7004	12.7986	11.6826	11.656	12.7793	12.6955	13.0633	12.9814	12.8234	12.9227
uc007mjr.1	Unk	chr11	115899970	115922508	2.8721	3.14395	3.07708	2.80236	2	1.73419	2.42933	3.16161	3.63589	2.56426
uc007mju.1	Unc13d	chr11	115936724	115939275	7.53928	7.10478	5.247	5.18087	7.16993	7.16882	7.87715	7.67585	8.28933	7.40975
uc007mjv.1	Wbp2	chr11	115939886	115948278	9.6742	9.95498	10.4949	10.6174	9.85954	9.75656	8.96849	9.05328	9.36607	9.36193
uc007mkb.2	Trim65	chr11	115986021	115992442	1.81766	1.3366	5.247	4.18087	3.80735	4.82165	2.04231	2.79904	3.37285	3.30123
uc007mke.1	Mrpl38	chr11	115999095	116000182	4.98758	4.50652	4.399	4.72836	5.12928	5.01959	5.84172	5.8076	6.11701	5.89816
uc007mki.1	Fbf1	chr11	116003598	116029492	2.02411	0.336596	3.07708	3.93986	2.58496	3.19362	1.14923	-0.593278	1.63589	1.56426
uc007mkn.2	2310004N24Rik	chr11	116060168	116076632	6.96271	6.77954	8.805	8.45771	7.55459	7.57968	6.61333	6.67351	7.32705	7.00167
uc007mkp.1	Evpl	chr11	116081872	116099405	6.20468	6.48634	3.07708	2.80236	8.75489	8.62293	5.54154	5.69212	6.75136	6.84349
uc007mkq.1	Srp68	chr11	116106479	116135531	9.4676	9.28204	8.98397	9.10614	9.75489	9.68256	9.37667	9.38114	9.24322	9.20812
uc007mkr.2	Galr2	chr11	116142252	116145252	4.40262	4.58452	2.07708	2.48043	6.20945	5.86347	3.6638	3.36092	5.54278	4.33685
uc007mks.2	Exoc7	chr11	116149311	116159492	3.70218	4.42406	5.247	5.38732	5.08746	4.68839	2.92683	1.86615	3.75136	3.56426
uc007mkw.1	Foxj1	chr11	116192017	116197704	1.43914	1.92156	4.399	5.60971	2.58496	2.54154	1.14923	0.406722	1.05092	0.979301
uc007mky.2	Rnf157	chr11	116197658	116274346	2.9752	3.79603	6.07708	6.65036	4.08746	3.43463	3.09676	2.93028	3.22085	3.37162
uc007mkz.1	Rnf157	chr11	116204861	116220623	2.02411	2.65852	4.66204	4.48043	3	2.90411	3.38627	1.57665	3.22085	2.88619
uc007mla.1	Rnf157	chr11	116264154	116274346	2.81766	2.92156	4.88443	4.38732	1.58496	2.90411	1.8013	1.86615	2.63589	2.78666
uc007mlb.1	Fam100b	chr11	116295407	116300391	9.98681	10.3548	9.92883	9.92338	9.86109	9.80699	9.6209	9.81664	10.1476	9.95228
uc007mlc.1	Qrich2	chr11	116302638	116315661	1.70218	3.65852	3.66204	1.48043	2.80735	1.73419	2.73419	2.65465	2.85828	3.06676
uc007mlf.1	AK009121	chr11	116393053	116394419	1.11722	0.336596	4.07708	2.48043	2.58496	1.31915	1.14923	0.72865	2.37285	0.979301
uc007mln.1	Ube2o	chr11	116399066	116442761	7.67372	7.94393	7.36248	7.92338	8.74483	8.42768	8.07319	8.30457	8.5862	8.48114
uc007mlu.2	Rhbdf2	chr11	116464566	116485566	1.43914	2.92156	2.07708	0.480432	4.32193	2.05612	1.14923	1.86615	2.85828	1.9793
uc007mlv.1	Cygb	chr11	116506908	116515627	1.92457	3.3366	3.07708	4.18087	3.70044	3.64108	2.04231	1.99168	2.85828	2.30123
uc007mlz.2	1810032O08Rik	chr11	116532973	116537112	6.25677	5.82845	5.399	6.00399	6.44294	6.62901	6.87715	7.01035	6.94574	6.72077
uc007mma.1	St6galnac2	chr11	116538018	116555974	5.47477	5.42406	5.77752	5.18087	5.32193	4.98212	6.06297	6.20114	5.83228	5.56426
uc007mmf.2	Mxra7	chr11	116664713	116689360	4.57665	4.72891	7.03127	7.19468	4.9542	5.01959	4.6638	4.76427	4.95781	4.88619
uc007mmg.1	Mxra7	chr11	116667890	116689360	3.6718	4.03704	5.53651	5.9067	4	4.48908	3.89646	3.61618	3.51036	3.9793
uc007mmj.1	Jmjd6	chr11	116700762	116704763	5.1059	5.19458	4.66204	5.38732	5.42626	5.51555	4.84967	4.74657	4.85828	5.04539
uc007mmk.2	1110005A03Rik	chr11	116704828	116707447	3.99986	3.92156	3.07708	2.06539	3.80735	4.31915	3.38627	3.45112	4.22085	3.56426
uc007mmn.2	Srsf2	chr11	116711210	116714408	8.44589	9.7332	7.53651	6.45771	9.88417	9.24198	10.3629	9.05688	9.54077	9.84039
uc007mmo.2	Srsf2	chr11	116711365	116714408	5.26696	5.58452	4.66204	5.12429	5.16993	6.28878	6.48142	6.25221	5.51036	6.14923
uc007mmp.1	Mfsd11	chr11	116714608	116736951	1.28714	1.3366	3.07708	3.06539	2.58496	3.43463	0.663799	2.79904	1.05092	2.88619
uc007mmu.1	Mgat5b	chr11	116780176	116848258	4.8854	4.72891	6.16454	6.60971	4.24793	4.94364	4.5898	4.83299	4.95781	5.04539
uc007mmx.2	2810008D09Rik	chr11	116938096	116940269	6.50092	6.69415	5.77752	6.06539	7.27612	6.68839	6.28439	6.60639	7.07329	7.17897
uc007mmz.2	Sec14l1	chr11	116976485	116990077	2.43914	1.92156	4.399	3.28779	4.16993	2.31915	1.5118	1.57665	3.75136	2.14923
uc007mna.2	Sec14l1	chr11	116976485	117013499	3.92457	4.42406	3.07708	4.56789	3.32193	3.64108	3.86543	3.2647	4.05092	4.56426
uc007mnc.2	Sec14l1	chr11	116976485	117020582	6.96584	6.90645	5.66204	6.82028	5.61471	5.73419	6.21224	6.10021	5.98166	5.72077
uc007mne.2	2016-09-09	chr11	117127559	117223639	2.43914	2.3366	5.53651	5.48043	5.16993	3.98212	1.14923	1.86615	2.37285	2.88619
uc007mng.2	2016-09-09	chr11	117193626	117223639	1.57665	1.3366	4.07708	4.06539	2.32193	0.734188	-0.0731664	1.21408	1.05092	1.9793
uc007mnh.2	2900041M22Rik	chr11	117472560	117474731	4.99986	5.42406	2.07708	0.480432	4.9542	5.05612	4.49162	4.86615	5.33633	5.42224
uc007mnj.1	Tnrc6c	chr11	117516278	117624753	2.76107	4.24349	4.66204	4.48043	2.58496	4.05612	2.8013	2.99168	2.85828	2.30123
uc007mnl.1	AK157659	chr11	117610544	117614458	4.04795	4.14395	4.88443	4.56789	4.24793	3.90411	4.5898	4.28937	4.29885	4.06676
uc007mnn.2	Tmc6	chr11	117627298	117640962	1.11722	1.92156	3.07708	0.480432	3	2.54154	0.926834	0.406722	2.37285	2.14923
uc007mnx.2	Syngr2	chr11	117670980	117675600	8.09593	8.49647	9.1105	9.19811	11.0348	10.7158	8.4517	8.73652	9.71626	9.59677
uc007mnz.2	Tk1	chr11	117676832	117687328	9.71107	9.70728	10.3297	10.3086	10.9571	10.7956	10.5127	10.7471	11.0167	10.8847
uc007moe.1	Birc5	chr11	117710550	117717057	6.80372	6.79603	6.247	6.26179	6.18982	6.10923	6.9785	6.72413	6.55872	6.42224
uc007moi.2	Socs3	chr11	117827400	117830680	10.3067	10.4876	6.46939	6.87275	10.7599	10.632	10.4724	10.5854	11.016	10.8291
uc007mov.2	Usp36	chr11	118145108	118151558	4.11722	4.50652	3.66204	3.06539	4.39232	4.43463	4.29607	4.53601	4.51036	4.53389
uc007mow.1	Timp2	chr11	118162374	118216725	9.2205	9.18834	9.3532	9.46912	9.67772	9.86089	7.65248	7.74434	8.43894	8.34562
uc007moz.1	Lgals3bp	chr11	118254065	118263245	4.36514	4.03704	5.98397	5.97228	5.39232	5.71147	3.24876	3.79904	4.95781	4.88619
uc007mpe.1	Cant1	chr11	118267602	118280400	4.54348	5.29079	5.88443	6.43463	5.97728	5.73419	4.57069	5.05058	5.05092	4.73419
uc007mpt.1	Cbx2	chr11	118884342	118892584	8.41184	8.60806	8.58487	8.99613	9.40514	9.1457	8.50929	8.66411	8.67663	8.21292
uc007mpu.1	Cbx8	chr11	118899749	118902227	4.11722	4.42406	7.50334	7.59937	6.76818	6.43463	3.42933	2.31361	5.18021	4.95658
uc007mqc.1	Ccdc40	chr11	119089885	119126526	6.33638	6.3366	3.66204	2.06539	4.75489	4.98212	3.86543	4.28937	3.75136	3.9793
uc007mqj.1	Eif4a3	chr11	119149676	119161357	11.9247	11.9755	11.1934	11.6529	12.4453	12.4482	11.9782	12.1686	12.3969	12.3201
uc007mql.1	Sgsh	chr11	119204802	119216824	5.1725	5.14395	7.247	7.31332	7.26679	7.23403	4.49162	4.10716	5.54278	5.37162
uc007mqm.1	Slc26a11	chr11	119216870	119242390	3.16161	2.65852	3.07708	3.93986	3.70044	3.73419	1.5118	1.86615	2.85828	0.979301
uc007mqo.1	Rnf213	chr11	119287375	119291618	4.98758	4.98045	4.88443	3.93986	2	3.19362	3.55132	4.28937	4.13839	4.2647
uc007mqp.1	BC075659	chr11	119322514	119352549	3.70218	3.3366	4.07708	4.28779	3.32193	2.54154	3.5118	3.83299	4.22085	3.56426
uc007mqq.2	Rnf213	chr11	119328535	119348731	6.40723	5.622	5.247	5.97228	3.90689	4.19362	5.54154	5.57665	5.29885	5.69355
uc007mqv.1	Nptx1	chr11	119400032	119409134	3.54348	4.24349	10.8084	10.876	3.16992	3.73419	2.04231	2.21408	2.85828	2.78666
uc007mqw.1	Rptor	chr11	119464308	119643595	2.36514	3.14395	2.07708	3.65036	2.32193	2.05612	2.86543	3.40672	2.05092	2.67974
uc007mqy.1	Rptor	chr11	119464308	119706353	1.92457	1.92156	2.07708	2.80236	3	2.31915	3.38627	2.72865	3.22085	1.78666
uc007mrd.2	Chmp6	chr11	119775123	119780866	8.43914	8.48125	9.56089	9.78877	10.0607	9.86476	8.65475	8.82141	9.25794	9.17036
uc007mrf.1	AK077811	chr11	119799824	119803388	2.36514	2.3366	2.07708	1.48043	4.80735	4.68839	1.8013	2.57665	4.13839	4.30123
uc007mri.1	Baiap2	chr11	119804405	119864399	2.28714	2.92156	4.07708	3.28779	3.45943	3.43463	1.5118	1.21408	3.05092	3.22723
uc007mrj.2	Baiap2	chr11	119804405	119868096	6.44813	6.86016	6.66204	6.41117	7.53916	7.218	5.21224	5.30154	6.33633	6.11885
uc007mrp.2	Azi1	chr11	119925743	119948141	6.15064	7.00902	7.53651	7.98028	7.25739	7.25775	6.5168	6.61618	6.73742	6.68666
uc007mrs.1	2410002I01Rik	chr11	119951835	119960045	4.07141	4.14395	4.399	4.87275	3.90689	4.43463	4.17476	3.31361	4.05092	3.37162
uc007mru.2	1810043H04Rik	chr11	119960247	119961738	6.45707	6.64038	7.50334	7.57846	8.19967	8.18127	6.8849	7.06136	7.62835	7.41393
[truncated: 9,768 more rows]

## Sheet: Barplots
gene_name	gene_ID	ES_Rep1	ES_Rep2	pNPC_Rep1	pNPC_Rep2	iPS_Rep1	iPS_Rep2	ES2i_Rep1	ES2i_Rep2	iPS2i_Rep1	iPS2i_Rep2	Unlogged->	ES_Rep1_unlogged	ES_Rep2_unlogged	pNPC_Rep1_unlogged	pNPC_Rep2_unlogged	iPS_Rep1_unlogged	iPS_Rep2_unlogged	ES2i_Rep1_unlogged	ES2i_Rep2_unlogged	iPS2i_Rep1_unlogged	iPS2i_Rep2_unlogged	gene_name2
Nanogpd	uc009dpp.1	7.56016	6.76286	2.07708	0.480432	4.16993	4.37804	8.5168	8.24435	7.41725	6.96229		188.727	108.598	4.21952	1.39516	18.0001	20.7932	366.279	303.247	170.929	124.698	Nanogpd
Pou5f1	uc008chu.1	12.4518	12.3878	2.07708	0.480432	14.2065	13.797	12.0668	12.2803	12.8683	12.8375		5602.29	5359.19	4.21952	1.39516	18905.3	14233.5	4290.11	4974.38	7477.29	7319.35	Pou5f1
Klf4	uc008sxk.2	8.66025	8.83644	5.77752	5.65036	10.764	10.4172	9.66998	9.64154	9.56662	9.52523		404.571	457.123	54.8538	50.2259	1738.95	1367.38	814.618	798.717	758.297	736.851	Klf4
Sox2	uc008oxu.1	11.1698	11.4327	10.3107	10.2168	9.07146	9.16464	11.6303	11.2475	10.6993	10.6344		2303.8	2764.3	1270.08	1190.04	537.999	573.894	3170.07	2431.28	1662.69	1589.55	Sox2
Olig1	uc007zxf.1	6.36039	6.60338	14.1807	14.4055	6.37504	6.43463	5.04231	5.56659	6.52666	6.08783		82.1615	97.2334	18570.2	21701.4	83	86.5001	32.9524	47.3926	92.1978	68.0173	Olig1
Olig2	uc007zxe.1	7.23356	7.39188	12.9787	13.148	6.32193	6.10923	6.49162	6.53084	7.24075	7.07733		150.494	167.949	8071.94	9077	80.0001	69.0338	89.9855	92.4653	151.246	135.048	Olig2
Urb1	uc007zwm.2	10.0316	10.118	6.88443	7.78421	9.24555	9.18746	10.133	10.2133	10.0481	9.97224		1046.68	1111.27	118.146	220.435	606.999	583.044	1122.89	1187.16	1058.72	1004.48	Urb1		Olig 1	Rep					Olig 2	Rep
2610039C10Rik	uc007zwj.1	8.10874	8.3366	7.28653	7.24862	7.53916	7.37804	8.2652	8.18151	8.17505	8.07206		276.041	323.271	156.122	152.073	186	166.346	307.661	290.322	289.025	269.111	2610039C10Rik		Cell Type	1	2	Average	SD		Cell Type	1	2	Average	SD
Zfp462	uc008sxi.1	9.21919	9.2937	8.79132	8.65036	7.65105	8.25383	9.7718	9.84239	8.88381	9.03051		596.009	627.599	443.048	401.807	201	305.246	874.188	918.025	472.382	522.943	Zfp462		ES 2i	32.9524	47.3926	40.1725	10.2108		ES 2i	89.9855	92.4653	91.2254	1.7535
Ctcf	uc009ndm.2	4.34603	4.58452	3.07708	3.28779	2.80735	2.73419	4.40796	4.02143	4.22085	3.37162		20.3369	23.9926	8.43905	9.76615	6.99998	6.65385	21.2289	16.2394	18.6467	10.3504	Ctcf		ES Serum	82.1615	97.2334	89.6974	10.6575		ES	150.494	167.949	159.221	12.3428
Nes	uc008ptl.1	0.702178	0.336596	4.399	4.38732	2	1.31915	0.341871	-0.00831527	1.63589	1.56426		1.62696	1.26277	21.0975	20.9274	4	2.49519	1.2674	0.994253	3.10779	2.95726	Nes		pNPC	18570.2	21701.4	20135.8	2214.1		pNPC	8071.94	9077	8574.47	710.684
Bcan	uc008pto.2	1.43914	2.3366	9.97189	10.4185	1	1.73419	-0.658129	-0.00831527	0.0509239	0.564264		2.71159	5.05111	1004.24	1368.61	2	3.32693	0.6337	0.994253	1.03593	1.47863	Bcan
Il10rb	uc007zxk.2	4.16161	4.50652	5.53651	5.56789	5.16993	5.54154	2.98573	3.10716	3.95781	3.50286		17.8966	22.7299	46.4147	47.4353	36.0001	46.5768	7.92126	8.61685	15.5389	11.3362	Il10rb
																														Fig S6E
																									Olig 1	Rep					Olig 2	Rep
																									Cell Type	1	2	Average	SD		Cell Type	1	2	Average	SD
																									ES	82.1615	97.2334	89.6974	10.6575		ES	150.494	167.949	159.221	12.3428
																									pNPC	18570.2	21701.4	20135.8	2214.1		pNPC	8071.94	9077	8574.47	710.684
																									iPS	83	86.5001	84.7501	2.47493		iPS	80.0001	69.0338	74.5169	7.75438
																									ES 2i	32.9524	47.3926	40.1725	10.2108		ES 2i	89.9855	92.4653	91.2254	1.7535
																									iPS 2i	92.1978	68.0173	80.1075	17.0982		iPS 2i	151.246	135.048	143.147	11.4534
																																											Bcan	Rep
																									CTCF	Rep					Nes	Rep					Bcan	Rep					Cell Type	1	2	Average	SD
																									Cell Type	1	2	Average	SD		Cell Type	1	2	Average	SD		Cell Type	1	2	Average	SD		ES 2i	0.6337	0.994253	0.813976	0.25495
																									ES	20.3369	23.9926	22.1648	2.58498		ES	1.62696	1.26277	1.44487	0.257518		ES	2.71159	5.05111	3.88135	1.65429		ES Serum	2.71159	5.05111	3.88135	1.65429
																									pNPC	8.43905	9.76615	9.1026	0.938404		pNPC	21.0975	20.9274	21.0124	0.120289		pNPC	1004.24	1368.61	1186.43	257.651		pNPC	1004.24	1368.61	1186.43	257.651
																									iPS	6.99998	6.65385	6.82691	0.244746		iPS	4	2.49519	3.2476	1.06406		iPS	2	3.32693	2.66346	0.938279
																									ES 2i	21.2289	16.2394	18.7342	3.5281		ES 2i	1.2674	0.994253	1.13083	0.193144		ES 2i	0.6337	0.994253	0.813976	0.25495
																									iPS 2i	18.6467	10.3504	14.4986	5.86636		iPS 2i	3.10779	2.95726	3.03252	0.106444		iPS 2i	1.03593	1.47863	1.25728	0.31304

## Sheet: miRNAs
gene_ID	gene_name	#chr	start_pos	end_pos	ES_Rep1	ES_Rep2	pNPC_Rep1	pNPC_Rep2	iPS_Rep1	iPS_Rep2	ES2i_Rep1	ES2i_Rep2	iPS2i_Rep1	iPS2i_Rep2	ES UP	2i UP
uc011wrv.1	Mir135b	chr1	134094664	134094761	1.81766	2.92156	2.07708	0.480432	3.16992	3.19362	0.341871	0.406722	1.05092	1.56426
uc011zpt.1	Mir17	chr14	115442892	115442976	3.2465	3.65852	3.66204	3.28779	4.52356	4.12651	4.22451	4.28937	3.37285	3.73419
uc011zpx.1	Mir17hg	chr14	115443526	115445950	6.96896	7.25546	5.53651	5.33841	5.85798	6.19362	7.97123	7.62104	6.15945	6.72077
uc011zpu.1	Mir18	chr14	115443072	115443168	3.43914	4.03704	4.07708	4.65036	4.39232	4.31915	4.38627	4.47281	4.37285	3.43873
uc012ejh.1	Mir182	chr6	30115917	30115992	0.117216	1.3366	2.07708	0.480432	2.80735	2.31915	1.5118	1.57665	2.05092	2.43873
uc012arx.1	Mir1894	chr17	36054833	36054914	5.1833	4.79603	6.325	5.38732	5.80735	6.01959	5.9785	6.05777	6.20067	5.78666
uc012hhh.1	Mir18b	chrX	50095507	50095590	4.68707	5.03704	2.07708	0.480432	4.85798	4.48908	4.34187	3.86615	4.37285	3.43873
uc012hat.1	Mir191	chr9	108470649	108471192	3.60907	3.65852	4.07708	3.80236	4	3.54154	4.14923	3.57665	4.75136	4.06676
uc011ylq.1	Mir1938	chr12	40949298	40949398	1.81766	2.65852	3.66204	3.48043	3.45943	3.90411	2.42933	2.57665	2.37285	3.14923
uc012bbg.1	Mir1949	chr18	35714220	35714290	8.29214	7.35896	6.46939	7.41117	7.81378	8.00097	8.00898	8.08268	7.99929	7.71739
uc011ywv.1	Mir1983	chr13	21988786	21988918	4.384	4.42406	5.07708	3.65036	4.24793	4.68839	5.11006	4.83299	4.80581	4.02369
uc011zpv.1	Mir19a	chr14	115443221	115443303	3.92457	5.03704	4.07708	3.28779	4.90689	4.77858	5.6906	3.99168	4.51036	4.47115
uc012dre.1	Mir200a	chr4	155429004	155429094	1.11722	2.65852	2.07708	0.480432	2.80735	1.31915	-0.658129	1.21408	2.63589	2.78666
uc011zpw.1	Mir20a	chr14	115443378	115443485	2.02411	3.14395	4.07708	2.48043	2.58496	3.05612	2.14923	2.57665	1.63589	2.14923
uc011zov.1	Mir2145-2	chr14	78710955	78711107	0.439144	0.336596	2.07708	0.480432	3.16992	2.90411	1.6638	2.21408	3.37285	2.30123
uc012efg.1	Mir25	chr5	138606548	138606632	3.20468	3.65852	4.07708	4.28779	4.16993	4.19362	4.19985	4.74657	4.05092	4.06676
uc007bma.2	Mir26b	chr1	74440883	74440968	0.702178	0.336596	2.07708	2.80236	3.16992	2.05612	2.04231	1.57665	2.85828	1.9793
uc011zav.1	Mir27b	chr13	63402019	63402092	1.70218	2.92156	2.07708	2.06539	4.16993	4.05612	1.14923	2.49418	3.37285	3.14923
uc012ewc.1	Mir290	chr7	3218626	3218709	7.4301	7.31388	2.07708	0.480432	5.32193	5.80028	7.39444	7.26159	7.36381	7.41809
uc012cku.1	Mir296	chr2	174092547	174092626	2.36514	2.65852	3.66204	3.65036	4.24793	3.98212	3.09676	3.76427	3.85828	3.22723
uc011ypm.1	Mir3068	chr12	88778628	88778707	3.36514	3.50652	2.07708	3.93986	2.80735	3.43463	4.24876	3.89858	3.75136	2.88619
uc012cly.1	Mir3091	chr2	179992240	179992316	0.924571	1.92156	2.07708	2.48043	2.32193	2.54154	1.8013	1.86615	1.05092	1.56426
uc012ejm.1	Mir335	chr6	30691298	30691396	1.81766	2.92156	4.66204	4.80236	0	2.54154	4.24876	2.86615	1.05092	2.43873
uc011xzs.1	Mir423	chr11	76891565	76891674	1.28714	0.336596	2.07708	2.48043	2	1.73419	2.04231	1.72865	2.05092	0.979301
uc012bqi.1	Mir669a-1	chr2	10425413	10425510	3.11722	4.14395	2.07708	2.06539	1.58496	2.05612	0.663799	0.406722	2.05092	1.56426
uc012bpq.1	Mir669a-2	chr2	10403381	10403480	2.57665	2.92156	2.07708	0.480432	2	2.31915	0.341871	1.40672	2.05092	1.78666
uc012bqr.1	Mir669i	chr2	10439230	10439357	3.64078	4.03704	2.07708	0.480432	3.58496	4.43463	1.5118	1.72865	3.22085	2.67974
uc012bpi.1	Mir669k	chr2	10396926	10397053	4.20468	4.42406	2.07708	0.480432	2.58496	3.31915	2.04231	1.72865	1.63589	3.22723
uc011xpy.1	Mir677	chr10	127522341	127522450	2.92457	1.3366	3.07708	3.28779	3.58496	3.19362	4.0143	3.21408	3.95781	3.67974
uc012dku.1	Mir697	chr4	124408937	124409046	1.28714	2.3366	2.07708	2.48043	3	2.31915	1.8013	2.21408	2.37285	2.14923
uc012fjw.1	Mir707	chr7	52105068	52105141	2.8721	3.92156	4.66204	4.48043	4.80735	4.05612	2.73419	2.79904	3.51036	3.22723
uc011zap.1	Mir7-1	chr13	58494139	58494247	4.04795	3.92156	3.66204	4.65036	3.80735	3.73419	5.0143	4.88246	4.05092	3.88619
uc012ath.1	Mir715	chr17	39981080	39981190	13.4524	14.4464	15.2508	15.0792	16.6459	15.9403	13.7524	14.0787	15.3038	15.1139
uc012efh.1	Mir93	chr5	138606750	138606838	2.36514	3.50652	3.66204	3.80236	3.16992	3.43463	3.55132	3.57665	3.51036	2.14923
					ES Avg	3.57713						3.62566
