# Supplementary material for: YY1 and CTCF orchestrate a 3D chromatin looping switch during early neural lineage commitment
Source: HighWire-hosted journal article supplement (doi:10.1101/gr.215160.116), 2017-05-23
Supplement: Supplemental_custom_scripts_5C_analysis.zip [file Klf4_4C_Track.xlsx]

## Sheet: Sheet1
Klf4: chr4:55,540,009-55,545,347			55543978	55547978
					pNPC 1	pNPC 1	ES Serum 1	ES Serum 1	ES 2i 1	ES 2i 1
Bin of Interest	Other Bin	Other Bin Start	Other Bin Stop	Other Bin Middle	log2(Relative Interaction Frequency)	Relative Interaction Frequency	log2(Relative Interaction Frequency)	Relative Interaction Frequency	log2(Relative Interaction Frequency)	Relative Interaction Frequency
Klf4_BIN_161	Klf4_BIN_000	54899978	54903978	54901978	3.0408	8.22949	2.31443	4.9741	3.01404	8.07823
Klf4_BIN_161	Klf4_BIN_001	54903978	54907978	54905978	3.00732	8.04069	2.41136	5.31977	3.11819	8.68296
Klf4_BIN_161	Klf4_BIN_002	54907978	54911978	54909978	3.00732	8.04069	2.41136	5.31977	3.11819	8.68296
Klf4_BIN_161	Klf4_BIN_003	54911978	54915978	54913978	2.87292	7.32548	2.65653	6.30514	3.15771	8.92412
Klf4_BIN_161	Klf4_BIN_004	54915978	54919978	54917978	2.46885	5.53604	2.87848	7.35376	3.39017	10.4844
Klf4_BIN_161	Klf4_BIN_005	54919978	54923978	54921978	2.65864	6.31438	2.34478	5.07983	4.09983	17.1464
Klf4_BIN_161	Klf4_BIN_006	54923978	54927978	54925978	2.65864	6.31438	2.34478	5.07983	4.09983	17.1464
Klf4_BIN_161	Klf4_BIN_007	54927978	54931978	54929978	2.98026	7.89128	2.20184	4.60067	4.09418	17.0793
Klf4_BIN_161	Klf4_BIN_008	54931978	54935978	54933978	3.4949	11.2738	2.57185	5.94572	4.1732	18.0408
Klf4_BIN_161	Klf4_BIN_009	54935978	54939978	54937978	3.71323	13.1158	2.4638	5.51667	4.35129	20.4112
Klf4_BIN_161	Klf4_BIN_010	54939978	54943978	54941978	3.71323	13.1158	2.4638	5.51667	4.35129	20.4112
Klf4_BIN_161	Klf4_BIN_011	54943978	54947978	54945978	4.33116	20.1284	2.79892	6.95921	4.24656	18.9819
Klf4_BIN_161	Klf4_BIN_012	54947978	54951978	54949978	4.01689	16.1884	3.10096	8.57987	3.98098	15.7904
Klf4_BIN_161	Klf4_BIN_013	54951978	54955978	54953978	3.50592	11.3602	2.8105	7.01526	3.76634	13.6076
Klf4_BIN_161	Klf4_BIN_014	54955978	54959978	54957978	3.79032	13.8357	3.05781	8.32707	3.9971	15.9678
Klf4_BIN_161	Klf4_BIN_015	54959978	54963978	54961978	3.22484	9.34921	2.80623	6.99455	4.22482	18.698
Klf4_BIN_161	Klf4_BIN_016	54963978	54967978	54965978	3.09266	8.53068	2.74405	6.69947	4.31401	19.8905
Klf4_BIN_161	Klf4_BIN_017	54967978	54971978	54969978	3.08431	8.48143	2.8041	6.98422	4.45406	21.9182
Klf4_BIN_161	Klf4_BIN_018	54971978	54975978	54973978	3.04999	8.28209	3.06937	8.39406	3.90962	15.0285
Klf4_BIN_161	Klf4_BIN_019	54975978	54979978	54977978	3.12491	8.72354	3.23941	9.44407	3.55257	11.7336
Klf4_BIN_161	Klf4_BIN_020	54979978	54983978	54981978	3.22014	9.31875	3.04925	8.2778	3.67551	12.7773
Klf4_BIN_161	Klf4_BIN_021	54983978	54987978	54985978	3.22014	9.31875	3.04925	8.2778	3.67551	12.7773
Klf4_BIN_161	Klf4_BIN_022	54987978	54991978	54989978	2.8587	7.25362	2.87979	7.36043	3.50523	11.3548
Klf4_BIN_161	Klf4_BIN_023	54991978	54995978	54993978	3.21031	9.25547	3.16966	8.99837	4.50051	22.6354
Klf4_BIN_161	Klf4_BIN_024	54995978	54999978	54997978	3.45702	10.9816	2.98781	7.9327	4.70285	26.0434
Klf4_BIN_161	Klf4_BIN_025	54999978	55003978	55001978	2.30468	4.94058	2.79177	6.92479	4.59673	24.1966
Klf4_BIN_161	Klf4_BIN_026	55003978	55007978	55005978	2.30468	4.94058	2.79177	6.92479	4.59673	24.1966
Klf4_BIN_161	Klf4_BIN_027	55007978	55011978	55009978	1.65651	3.15252	3.04335	8.24405	4.81146	28.0797
Klf4_BIN_161	Klf4_BIN_028	55011978	55015978	55013978	2.5572	5.88565	2.70538	6.52228	4.24742	18.9933
Klf4_BIN_161	Klf4_BIN_029	55015978	55019978	55017978	2.83112	7.11628	2.49962	5.65536	4.29826	19.6745
Klf4_BIN_161	Klf4_BIN_030	55019978	55023978	55021978	3.5389	11.6229	2.5246	5.75415	4.2767	19.3827
Klf4_BIN_161	Klf4_BIN_031	55023978	55027978	55025978	3.5389	11.6229	2.5246	5.75415	4.2767	19.3827
Klf4_BIN_161	Klf4_BIN_032	55027978	55031978	55029978	3.62065	12.3006	2.59395	6.0375	4.33444	20.1742
Klf4_BIN_161	Klf4_BIN_033	55031978	55035978	55033978	3.77971	13.7343	2.62677	6.17642	3.55423	11.7471
Klf4_BIN_161	Klf4_BIN_034	55035978	55039978	55037978	3.74294	13.3887	2.86431	7.28189	3.31739	9.9686
Klf4_BIN_161	Klf4_BIN_035	55039978	55043978	55041978	3.74294	13.3887	2.86431	7.28189	3.31739	9.9686
Klf4_BIN_161	Klf4_BIN_036	55043978	55047978	55045978	3.87347	14.6565	2.87523	7.33722	3.39429	10.5144
Klf4_BIN_161	Klf4_BIN_037	55047978	55051978	55049978	3.25583	9.55218	2.81372	7.03093	4.07252	16.8248
Klf4_BIN_161	Klf4_BIN_038	55051978	55055978	55053978	3.45262	10.9482	3.23193	9.39523	4.0616	16.698
Klf4_BIN_161	Klf4_BIN_039	55055978	55059978	55057978	3.66261	12.6636	2.89477	7.43727	4.16469	17.9348
Klf4_BIN_161	Klf4_BIN_040	55059978	55063978	55061978	4.14595	17.7034	2.83613	7.14103	3.97212	15.6938
Klf4_BIN_161	Klf4_BIN_041	55063978	55067978	55065978	3.99894	15.9882	3.02333	8.13042	3.90808	15.0124
Klf4_BIN_161	Klf4_BIN_042	55067978	55071978	55069978	3.91759	15.1117	3.00721	8.04008	3.89218	14.8478
Klf4_BIN_161	Klf4_BIN_043	55071978	55075978	55073978	3.71954	13.1732	3.08954	8.51227	4.013	16.1448
Klf4_BIN_161	Klf4_BIN_044	55075978	55079978	55077978	3.61839	12.2813	3.42363	10.7304	3.66934	12.7228
Klf4_BIN_161	Klf4_BIN_045	55079978	55083978	55081978	2.90093	7.46908	3.24746	9.49689	3.88761	14.8009
Klf4_BIN_161	Klf4_BIN_046	55083978	55087978	55085978	3.15765	8.92374	3.32149	9.99698	3.80621	13.9889
Klf4_BIN_161	Klf4_BIN_047	55087978	55091978	55089978	3.34112	10.134	3.14501	8.84589	3.88596	14.7839
Klf4_BIN_161	Klf4_BIN_048	55091978	55095978	55093978	3.3067	9.89501	3.06529	8.37038	3.75119	13.4655
Klf4_BIN_161	Klf4_BIN_049	55095978	55099978	55097978	3.626	12.3463	3.11754	8.67906	3.79977	13.9266
Klf4_BIN_161	Klf4_BIN_050	55099978	55103978	55101978	3.66075	12.6472	3.12402	8.71813	3.8296	14.2176
Klf4_BIN_161	Klf4_BIN_051	55103978	55107978	55105978	3.37872	10.4015	3.08333	8.47569	3.45077	10.9342
Klf4_BIN_161	Klf4_BIN_052	55107978	55111978	55109978	3.41058	10.6338	3.32422	10.0159	3.89061	14.8317
Klf4_BIN_161	Klf4_BIN_053	55111978	55115978	55113978	3.41058	10.6338	3.32422	10.0159	3.89061	14.8317
Klf4_BIN_161	Klf4_BIN_054	55115978	55119978	55117978	3.40219	10.5721	2.90137	7.47136	4.0606	16.6864
Klf4_BIN_161	Klf4_BIN_055	55119978	55123978	55121978	3.21661	9.29597	2.8758	7.34009	3.69999	12.9959
Klf4_BIN_161	Klf4_BIN_056	55123978	55127978	55125978	2.89227	7.42436	2.99321	7.96245	4.13445	17.5627
Klf4_BIN_161	Klf4_BIN_057	55127978	55131978	55129978	2.89227	7.42436	2.99321	7.96245	4.13445	17.5627
Klf4_BIN_161	Klf4_BIN_058	55131978	55135978	55133978	3.17943	9.05951	3.21306	9.27314	3.60166	12.1397
Klf4_BIN_161	Klf4_BIN_059	55135978	55139978	55137978	2.90732	7.50223	3.45027	10.9304	3.78455	13.7804
Klf4_BIN_161	Klf4_BIN_060	55139978	55143978	55141978	2.92678	7.60409	3.68714	12.8807	4.20919	18.4966
Klf4_BIN_161	Klf4_BIN_061	55143978	55147978	55145978	2.92678	7.60409	3.68714	12.8807	4.20919	18.4966
Klf4_BIN_161	Klf4_BIN_062	55147978	55151978	55149978	2.73548	6.65979	3.76578	13.6023	4.13118	17.5231
Klf4_BIN_161	Klf4_BIN_063	55151978	55155978	55153978	2.36487	5.15105	3.69578	12.9581	4.59102	24.101
Klf4_BIN_161	Klf4_BIN_064	55155978	55159978	55157978	2.86726	7.29678	3.15015	8.8775	4.12618	17.4625
Klf4_BIN_161	Klf4_BIN_065	55159978	55163978	55161978	2.9128	7.53076	3.37693	10.3886	4.36238	20.5687
Klf4_BIN_161	Klf4_BIN_066	55163978	55167978	55165978	2.9128	7.53076	3.37693	10.3886	4.36238	20.5687
Klf4_BIN_161	Klf4_BIN_067	55167978	55171978	55169978	2.9128	7.53076	3.37693	10.3886	4.36238	20.5687
Klf4_BIN_161	Klf4_BIN_068	55171978	55175978	55173978	3.0884	8.50551	3.61781	12.2764	4.24717	18.9901
Klf4_BIN_161	Klf4_BIN_069	55175978	55179978	55177978	3.06649	8.37733	3.57664	11.931	4.38644	20.9146
Klf4_BIN_161	Klf4_BIN_070	55179978	55183978	55181978	4.13602	17.5819	3.34768	10.1801	3.67448	12.7682
Klf4_BIN_161	Klf4_BIN_071	55183978	55187978	55185978	4.45967	22.0037	3.45465	10.9636	3.43511	10.8161
Klf4_BIN_161	Klf4_BIN_072	55187978	55191978	55189978	4.22781	18.7368	3.212	9.26636	3.62884	12.3706
Klf4_BIN_161	Klf4_BIN_073	55191978	55195978	55193978	4.13963	17.6259	3.21679	9.29717	3.73796	13.3425
Klf4_BIN_161	Klf4_BIN_074	55195978	55199978	55197978	3.68	12.8172	2.66371	6.33662	3.84689	14.3889
Klf4_BIN_161	Klf4_BIN_075	55199978	55203978	55201978	3.4884	11.2231	2.99348	7.96394	3.98733	15.8601
Klf4_BIN_161	Klf4_BIN_076	55203978	55207978	55205978	3.30068	9.85381	3.2554	9.54934	4.02596	16.2905
Klf4_BIN_161	Klf4_BIN_077	55207978	55211978	55209978	3.44709	10.9063	3.33592	10.0974	4.16553	17.9453
Klf4_BIN_161	Klf4_BIN_078	55211978	55215978	55213978	3.43454	10.8119	3.35018	10.1978	4.10949	17.2615
Klf4_BIN_161	Klf4_BIN_079	55215978	55219978	55217978	3.84921	14.4121	3.84434	14.3635	4.31203	19.8632
Klf4_BIN_161	Klf4_BIN_080	55219978	55223978	55221978	3.74054	13.3664	3.91738	15.1095	4.33929	20.2421
Klf4_BIN_161	Klf4_BIN_081	55223978	55227978	55225978	3.70355	13.0281	3.73612	13.3255	4.62403	24.6589
Klf4_BIN_161	Klf4_BIN_082	55227978	55231978	55229978	3.23748	9.43144	3.59558	12.0886	4.31962	19.9681
Klf4_BIN_161	Klf4_BIN_083	55231978	55235978	55233978	3.0676	8.38377	3.66948	12.724	4.08602	16.983
Klf4_BIN_161	Klf4_BIN_084	55235978	55239978	55237978	2.98533	7.91907	3.48197	11.1732	4.04649	16.524
Klf4_BIN_161	Klf4_BIN_085	55239978	55243978	55241978	3.06057	8.34302	3.6667	12.6995	4.13499	17.5694
Klf4_BIN_161	Klf4_BIN_086	55243978	55247978	55245978	3.21155	9.26343	3.36803	10.3247	4.71025	26.1773
Klf4_BIN_161	Klf4_BIN_087	55247978	55251978	55249978	3.99631	15.9592	3.63845	12.4532	4.60965	24.4142
Klf4_BIN_161	Klf4_BIN_088	55251978	55255978	55253978	3.8763	14.6853	3.45179	10.9419	4.75009	26.9103
Klf4_BIN_161	Klf4_BIN_089	55255978	55259978	55257978	4.15298	17.7899	3.433	10.8003	4.76759	27.2388
Klf4_BIN_161	Klf4_BIN_090	55259978	55263978	55261978	4.10152	17.1664	3.39442	10.5153	4.66115	25.3015
Klf4_BIN_161	Klf4_BIN_091	55263978	55267978	55265978	4.30228	19.7295	3.55572	11.7592	4.47609	22.2554
Klf4_BIN_161	Klf4_BIN_092	55267978	55271978	55269978	4.24839	19.0061	3.77083	13.65	4.38857	20.9455
Klf4_BIN_161	Klf4_BIN_093	55271978	55275978	55273978	4.55516	23.5093	3.65566	12.6027	4.42156	21.43
Klf4_BIN_161	Klf4_BIN_094	55275978	55279978	55277978	4.49851	22.604	3.601	12.1342	4.45293	21.901
Klf4_BIN_161	Klf4_BIN_095	55279978	55283978	55281978	3.89495	14.8763	3.53089	11.5586	5.03759	32.8446
Klf4_BIN_161	Klf4_BIN_096	55283978	55287978	55285978	3.89495	14.8763	3.53089	11.5586	5.03759	32.8446
Klf4_BIN_161	Klf4_BIN_097	55287978	55291978	55289978	3.73687	13.3325	3.79033	13.8358	5.04899	33.1052
Klf4_BIN_161	Klf4_BIN_098	55291978	55295978	55293978	3.87043	14.6257	4.11123	17.2823	5.23663	37.7035
Klf4_BIN_161	Klf4_BIN_099	55295978	55299978	55297978	4.14625	17.707	4.12965	17.5045	5.20752	36.9504
Klf4_BIN_161	Klf4_BIN_100	55299978	55303978	55301978	4.14625	17.707	4.12965	17.5045	5.20752	36.9504
Klf4_BIN_161	Klf4_BIN_101	55303978	55307978	55305978	4.53351	23.1592	4.19513	18.3172	5.22069	37.2894
Klf4_BIN_161	Klf4_BIN_102	55307978	55311978	55309978	4.61244	24.4614	4.01519	16.1694	5.1001	34.2991
Klf4_BIN_161	Klf4_BIN_103	55311978	55315978	55313978	4.4285	21.5334	4.03663	16.4115	5.28398	38.9614
Klf4_BIN_161	Klf4_BIN_104	55315978	55319978	55317978	4.4285	21.5334	4.03663	16.4115	5.28398	38.9614
Klf4_BIN_161	Klf4_BIN_105	55319978	55323978	55321978	4.4285	21.5334	4.03663	16.4115	5.28398	38.9614
Klf4_BIN_161	Klf4_BIN_106	55323978	55327978	55325978	4.87682	29.3812	4.18653	18.2083	5.27197	38.6385
Klf4_BIN_161	Klf4_BIN_107	55327978	55331978	55329978	4.33359	20.1623	4.33103	20.1266	5.40435	42.3518
Klf4_BIN_161	Klf4_BIN_108	55331978	55335978	55333978	4.33359	20.1623	4.33103	20.1266	5.40435	42.3518
Klf4_BIN_161	Klf4_BIN_109	55335978	55339978	55337978	4.33359	20.1623	4.33103	20.1266	5.40435	42.3518
Klf4_BIN_161	Klf4_BIN_110	55339978	55343978	55341978	4.33359	20.1623	4.33103	20.1266	5.40435	42.3518
Klf4_BIN_161	Klf4_BIN_111	55343978	55347978	55345978	4.27492	19.3588	4.314	19.8904	5.61052	48.8578
Klf4_BIN_161	Klf4_BIN_112	55347978	55351978	55349978	4.6976	25.9489	4.49549	22.5567	5.56889	47.4681
Klf4_BIN_161	Klf4_BIN_113	55351978	55355978	55353978	4.6976	25.9489	4.49549	22.5567	5.56889	47.4681
Klf4_BIN_161	Klf4_BIN_114	55355978	55359978	55357978	4.6976	25.9489	4.49549	22.5567	5.56889	47.4681
Klf4_BIN_161	Klf4_BIN_115	55359978	55363978	55361978	4.6976	25.9489	4.49549	22.5567	5.56889	47.4681
Klf4_BIN_161	Klf4_BIN_116	55363978	55367978	55365978	5.14656	35.4216	4.70947	26.1632	5.8724	58.5827
Klf4_BIN_161	Klf4_BIN_117	55367978	55371978	55369978	5.14656	35.4216	4.70947	26.1632	5.8724	58.5827
Klf4_BIN_161	Klf4_BIN_118	55371978	55375978	55373978	5.33377	40.3297	4.38871	20.9476	5.71802	52.6375
Klf4_BIN_161	Klf4_BIN_119	55375978	55379978	55377978	5.18489	36.3753	4.56496	23.6695	5.83212	56.9697
Klf4_BIN_161	Klf4_BIN_120	55379978	55383978	55381978	5.32567	40.1038	4.73394	26.6108	5.86307	58.2051
Klf4_BIN_161	Klf4_BIN_121	55383978	55387978	55385978	5.03096	32.6942	4.76305	27.1531	5.73917	53.4149
Klf4_BIN_161	Klf4_BIN_122	55387978	55391978	55389978	5.02944	32.6597	4.73294	26.5923	5.83857	57.2249
Klf4_BIN_161	Klf4_BIN_123	55391978	55395978	55393978	4.94832	30.874	4.71009	26.1746	5.77802	54.8727
Klf4_BIN_161	Klf4_BIN_124	55395978	55399978	55397978	4.94832	30.874	4.71009	26.1746	5.77802	54.8727
Klf4_BIN_161	Klf4_BIN_125	55399978	55403978	55401978	5.38202	41.7012	5.55505	47.015	6.66338	101.362
Klf4_BIN_161	Klf4_BIN_126	55403978	55407978	55405978	5.36636	41.2511	5.35585	40.9518	6.81084	112.271
Klf4_BIN_161	Klf4_BIN_127	55407978	55411978	55409978	5.36636	41.2511	5.35585	40.9518	6.81084	112.271
Klf4_BIN_161	Klf4_BIN_128	55411978	55415978	55413978	5.25892	38.2906	5.40194	42.2811	6.76177	108.517
Klf4_BIN_161	Klf4_BIN_129	55415978	55419978	55417978	5.10191	34.3421	5.57795	47.7673	6.58659	96.1081
Klf4_BIN_161	Klf4_BIN_130	55419978	55423978	55421978	4.89248	29.7018	5.33888	40.4726	6.38836	83.7701
Klf4_BIN_161	Klf4_BIN_131	55423978	55427978	55425978	4.89248	29.7018	5.33888	40.4726	6.38836	83.7701
Klf4_BIN_161	Klf4_BIN_132	55427978	55431978	55429978	4.97736	31.5017	5.3549	40.9246	5.87506	58.6908
Klf4_BIN_161	Klf4_BIN_133	55431978	55435978	55433978	4.95581	31.0347	5.41907	42.786	5.83689	57.1584
Klf4_BIN_161	Klf4_BIN_134	55435978	55439978	55437978	4.5425	23.304	5.53275	46.2939	5.85098	57.7193
Klf4_BIN_161	Klf4_BIN_135	55439978	55443978	55441978	4.5425	23.304	5.53275	46.2939	5.85098	57.7193
Klf4_BIN_161	Klf4_BIN_136	55443978	55447978	55445978	4.21474	18.568	5.54327	46.6327	6.08055	67.6748
Klf4_BIN_161	Klf4_BIN_137	55447978	55451978	55449978	4.22193	18.6607	5.54555	46.7066	6.2684	77.086
Klf4_BIN_161	Klf4_BIN_138	55451978	55455978	55453978	4.0958	17.0986	5.53553	46.3832	6.21515	74.2928
Klf4_BIN_161	Klf4_BIN_139	55455978	55459978	55457978	4.08522	16.9736	5.51517	45.7332	6.33145	80.5297
Klf4_BIN_161	Klf4_BIN_140	55459978	55463978	55461978	4.49536	22.5548	5.52049	45.9021	6.36253	82.2832
Klf4_BIN_161	Klf4_BIN_141	55463978	55467978	55465978	5.47023	44.3305	5.85791	57.9971	6.92936	121.884
Klf4_BIN_161	Klf4_BIN_142	55467978	55471978	55469978	4.91816	30.2352	5.71721	52.608	7.00376	128.334
Klf4_BIN_161	Klf4_BIN_143	55471978	55475978	55473978	5.07343	33.671	6.00611	64.2717	7.17028	144.035
Klf4_BIN_161	Klf4_BIN_144	55475978	55479978	55477978	5.28165	38.8988	6.12466	69.7762	7.22175	149.266
Klf4_BIN_161	Klf4_BIN_145	55479978	55483978	55481978	5.06465	33.4666	6.03174	65.4235	7.29021	156.521
Klf4_BIN_161	Klf4_BIN_146	55483978	55487978	55485978	5.65062	50.235	6.83498	114.165	7.49375	180.236
Klf4_BIN_161	Klf4_BIN_147	55487978	55491978	55489978	6.24844	76.0269	6.92828	121.793	7.37512	166.009
Klf4_BIN_161	Klf4_BIN_148	55491978	55495978	55493978	6.28959	78.2266	6.90446	119.798	7.35847	164.105
Klf4_BIN_161	Klf4_BIN_149	55495978	55499978	55497978	6.30982	79.3315	6.69403	103.539	7.29863	157.437
Klf4_BIN_161	Klf4_BIN_150	55499978	55503978	55501978	5.94989	61.8151	6.55775	94.2063	6.86402	116.486
Klf4_BIN_161	Klf4_BIN_151	55503978	55507978	55505978	5.6076	48.7591	6.5137	91.3736	6.75674	108.139
Klf4_BIN_161	Klf4_BIN_152	55507978	55511978	55509978	5.5246	46.0332	6.40248	84.5937	6.68354	102.789
Klf4_BIN_161	Klf4_BIN_153	55511978	55515978	55513978	5.39453	42.0645	6.25678	76.4678	6.58254	95.8387
Klf4_BIN_161	Klf4_BIN_154	55515978	55519978	55517978	5.88062	58.9173	6.65448	100.739	7.33748	161.735
Klf4_BIN_161	Klf4_BIN_155	55519978	55523978	55521978	6.88273	118.007	6.99794	127.817	7.43359	172.875
Klf4_BIN_161	Klf4_BIN_156	55523978	55527978	55525978	7.54241	186.419	6.67963	102.51	7.70856	209.174
Klf4_BIN_161	Klf4_BIN_157	55527978	55531978	55529978	8.32525	320.738	7.04894	132.416	8.21701	297.555
Klf4_BIN_161	Klf4_BIN_158	55531978	55535978	55533978	8.68006	410.165	7.24923	152.137	8.54815	374.326
Klf4_BIN_161	Klf4_BIN_159	55535978	55539978	55537978	8.7605	433.684	7.24249	151.429	8.55277	375.528
Klf4_BIN_161	Klf4_BIN_160	55539978	55543978	55541978	8.727	423.73	7.13228	140.291	8.49964	361.949
Klf4_BIN_161	Klf4_BIN_161	55543978	55547978	55545978	8.86226	465.377	7.02903	130.602	8.52849	369.259
Klf4_BIN_161	Klf4_BIN_162	55547978	55551978	55549978	8.72692	423.707	6.87235	117.161	8.43304	345.619
Klf4_BIN_161	Klf4_BIN_163	55551978	55555978	55553978	8.75515	432.078	6.8823	117.972	8.41548	341.438
Klf4_BIN_161	Klf4_BIN_164	55555978	55559978	55557978	7.88961	237.142	6.69795	103.821	7.50761	181.977
Klf4_BIN_161	Klf4_BIN_165	55559978	55563978	55561978	7.65534	201.599	6.94033	122.814	7.21049	148.106
Klf4_BIN_161	Klf4_BIN_166	55563978	55567978	55565978	7.33314	161.249	7.00414	128.368	6.99563	127.613
Klf4_BIN_161	Klf4_BIN_167	55567978	55571978	55569978	7.33314	161.249	7.00414	128.368	6.99563	127.613
Klf4_BIN_161	Klf4_BIN_168	55571978	55575978	55573978	6.67181	101.956	6.35319	81.7524	6.65229	100.586
Klf4_BIN_161	Klf4_BIN_169	55575978	55579978	55577978	6.43863	86.7404	5.63709	49.766	6.56578	94.7323
Klf4_BIN_161	Klf4_BIN_170	55579978	55583978	55581978	6.49153	89.9796	5.90844	60.0643	6.36038	82.161
Klf4_BIN_161	Klf4_BIN_171	55583978	55587978	55585978	6.48111	89.3325	5.84874	57.6298	6.29154	78.3324
Klf4_BIN_161	Klf4_BIN_172	55587978	55591978	55589978	6.67655	102.292	6.28354	77.8995	6.48502	89.5749
Klf4_BIN_161	Klf4_BIN_173	55591978	55595978	55593978	6.6794	102.494	6.41089	85.0884	6.30668	79.1587
Klf4_BIN_161	Klf4_BIN_174	55595978	55599978	55597978	6.84935	115.308	6.522	91.9003	6.32246	80.0297
Klf4_BIN_161	Klf4_BIN_175	55599978	55603978	55601978	6.65651	100.881	6.0175	64.781	6.39677	84.2596
Klf4_BIN_161	Klf4_BIN_176	55603978	55607978	55605978	6.53653	92.8309	5.72537	52.9062	6.18742	72.8782
Klf4_BIN_161	Klf4_BIN_177	55607978	55611978	55609978	6.62731	98.8596	5.64702	50.1099	5.92732	60.8559
Klf4_BIN_161	Klf4_BIN_178	55611978	55615978	55613978	6.56446	94.6453	5.49392	45.0645	5.9136	60.2797
Klf4_BIN_161	Klf4_BIN_179	55615978	55619978	55617978	6.49357	90.107	5.51371	45.6869	5.71152	52.401
Klf4_BIN_161	Klf4_BIN_180	55619978	55623978	55621978	6.61128	97.7674	5.60537	48.6837	5.85964	58.0666
Klf4_BIN_161	Klf4_BIN_181	55623978	55627978	55625978	6.77068	109.189	5.78579	55.1692	5.94556	61.6301
Klf4_BIN_161	Klf4_BIN_182	55627978	55631978	55629978	6.75609	108.09	5.71785	52.6314	6.09315	68.2688
Klf4_BIN_161	Klf4_BIN_183	55631978	55635978	55633978	6.75506	108.013	5.92774	60.8736	5.97231	62.7835
Klf4_BIN_161	Klf4_BIN_184	55635978	55639978	55637978	6.48803	89.762	5.93626	61.2338	6.00068	64.03
Klf4_BIN_161	Klf4_BIN_185	55639978	55643978	55641978	6.58459	95.9749	6.02908	65.3032	5.79191	55.4036
Klf4_BIN_161	Klf4_BIN_186	55643978	55647978	55645978	6.53713	92.8695	5.92602	60.8011	5.81615	56.3423
Klf4_BIN_161	Klf4_BIN_187	55647978	55651978	55649978	6.3922	83.993	5.96611	62.514	5.64699	50.1087
Klf4_BIN_161	Klf4_BIN_188	55651978	55655978	55653978	6.78119	109.987	6.40299	84.6237	5.91503	60.3393
Klf4_BIN_161	Klf4_BIN_189	55655978	55659978	55657978	6.57489	95.3324	5.68768	51.5423	5.68028	51.2784
Klf4_BIN_161	Klf4_BIN_190	55659978	55663978	55661978	6.57489	95.3324	5.68768	51.5423	5.68028	51.2784
Klf4_BIN_161	Klf4_BIN_191	55663978	55667978	55665978	6.57489	95.3324	5.68768	51.5423	5.68028	51.2784
Klf4_BIN_161	Klf4_BIN_192	55667978	55671978	55669978	6.22557	74.8315	5.07172	33.631	5.44916	43.6879
Klf4_BIN_161	Klf4_BIN_193	55671978	55675978	55673978	6.07863	67.585	5.52302	45.9827	6.33909	80.9571
Klf4_BIN_161	Klf4_BIN_194	55675978	55679978	55677978	6.28449	77.9507	5.46404	44.1408	6.33008	80.4535
Klf4_BIN_161	Klf4_BIN_195	55679978	55683978	55681978	6.01521	64.6784	5.84115	57.3273	6.12457	69.7715
Klf4_BIN_161	Klf4_BIN_196	55683978	55687978	55685978	6.08222	67.7531	5.76155	54.2501	6.09826	68.5109
Klf4_BIN_161	Klf4_BIN_197	55687978	55691978	55689978	6.08222	67.7531	5.76155	54.2501	6.09826	68.5109
Klf4_BIN_161	Klf4_BIN_198	55691978	55695978	55693978	6.17681	72.3442	5.77295	54.6803	5.96642	62.5275
Klf4_BIN_161	Klf4_BIN_199	55695978	55699978	55697978	6.14353	70.6945	5.81084	56.1354	5.7593	54.1654
Klf4_BIN_161	Klf4_BIN_200	55699978	55703978	55701978	6.50145	90.6009	5.61473	49.0008	5.59384	48.2962
Klf4_BIN_161	Klf4_BIN_201	55703978	55707978	55705978	6.4087	84.9591	5.55081	46.877	5.69817	51.9183
Klf4_BIN_161	Klf4_BIN_202	55707978	55711978	55709978	6.43296	86.4002	5.67794	51.1952	5.65858	50.5128
Klf4_BIN_161	Klf4_BIN_203	55711978	55715978	55713978	6.58327	95.8875	5.45101	43.744	5.68327	51.3847
Klf4_BIN_161	Klf4_BIN_204	55715978	55719978	55717978	6.27518	77.4491	5.09471	34.1713	5.53011	46.2092
Klf4_BIN_161	Klf4_BIN_205	55719978	55723978	55721978	6.50143	90.5992	5.01738	32.3878	5.45509	43.8679
Klf4_BIN_161	Klf4_BIN_206	55723978	55727978	55725978	6.55391	93.956	4.95156	30.9434	5.3564	40.9673
Klf4_BIN_161	Klf4_BIN_207	55727978	55731978	55729978	6.6234	98.5924	4.59446	24.1585	5.19701	36.6823
Klf4_BIN_161	Klf4_BIN_208	55731978	55735978	55733978	6.83756	114.37	4.50409	22.6916	4.7604	27.1033
Klf4_BIN_161	Klf4_BIN_209	55735978	55739978	55737978	6.83541	114.2	4.782	27.5122	4.90144	29.8869
Klf4_BIN_161	Klf4_BIN_210	55739978	55743978	55741978	6.80777	112.032	4.82313	28.3078	4.84841	28.8083
Klf4_BIN_161	Klf4_BIN_211	55743978	55747978	55745978	6.51939	91.7341	4.87082	29.2593	4.66453	25.3609
Klf4_BIN_161	Klf4_BIN_212	55747978	55751978	55749978	5.95576	62.0674	4.79622	27.7847	5.01727	32.3853
Klf4_BIN_161	Klf4_BIN_213	55751978	55755978	55753978	6.03411	65.5313	4.8455	28.7501	5.12002	34.7761
Klf4_BIN_161	Klf4_BIN_214	55755978	55759978	55757978	5.79432	55.4964	4.8138	28.1254	5.26953	38.5732
Klf4_BIN_161	Klf4_BIN_215	55759978	55763978	55761978	5.89993	59.7113	4.91569	30.1836	5.28984	39.1201
Klf4_BIN_161	Klf4_BIN_216	55763978	55767978	55765978	6.24899	76.0559	4.98568	31.6838	5.54592	46.7183
Klf4_BIN_161	Klf4_BIN_217	55767978	55771978	55769978	6.07776	67.5444	5.00662	32.1472	5.4148	42.6598
Klf4_BIN_161	Klf4_BIN_218	55771978	55775978	55773978	5.96198	62.3356	5.17746	36.1885	5.29923	39.3756
Klf4_BIN_161	Klf4_BIN_219	55775978	55779978	55777978	5.94735	61.7065	5.23311	37.6116	5.44603	43.593
Klf4_BIN_161	Klf4_BIN_220	55779978	55783978	55781978	5.85551	57.9008	5.11379	34.6261	5.45453	43.8508
Klf4_BIN_161	Klf4_BIN_221	55783978	55787978	55785978	5.88715	59.1846	5.12554	34.9092	5.49705	45.1625
Klf4_BIN_161	Klf4_BIN_222	55787978	55791978	55789978	5.90345	59.8569	5.17958	36.2418	5.53692	46.4279
Klf4_BIN_161	Klf4_BIN_223	55791978	55795978	55793978	5.82421	56.6582	5.08719	33.9935	5.38125	41.6792
Klf4_BIN_161	Klf4_BIN_224	55795978	55799978	55797978	5.7624	54.2819	4.77762	27.4289	5.22072	37.29
Klf4_BIN_161	Klf4_BIN_225	55799978	55803978	55801978	5.7624	54.2819	4.77762	27.4289	5.22072	37.29
Klf4_BIN_161	Klf4_BIN_226	55803978	55807978	55805978	5.71333	52.4669	4.8896	29.6425	5.17476	36.1209
Klf4_BIN_161	Klf4_BIN_227	55807978	55811978	55809978	5.76757	54.4769	4.92371	30.3518	5.24001	37.7921
Klf4_BIN_161	Klf4_BIN_228	55811978	55815978	55813978	5.73008	53.0794	5.00395	32.0877	5.12183	34.8198
Klf4_BIN_161	Klf4_BIN_229	55815978	55819978	55817978	5.73008	53.0794	5.00395	32.0877	5.12183	34.8198
Klf4_BIN_161	Klf4_BIN_230	55819978	55823978	55821978	5.73102	53.1141	5.02068	32.4621	5.11463	34.6462
Klf4_BIN_161	Klf4_BIN_231	55823978	55827978	55825978	5.70977	52.3373	4.93481	30.5863	5.10816	34.4914
Klf4_BIN_161	Klf4_BIN_232	55827978	55831978	55829978	5.6963	51.8511	4.84266	28.6936	5.15922	35.7339
Klf4_BIN_161	Klf4_BIN_233	55831978	55835978	55833978	5.6963	51.8511	4.84266	28.6936	5.15922	35.7339
Klf4_BIN_161	Klf4_BIN_234	55835978	55839978	55837978	5.71021	52.3532	4.74066	26.735	5.12686	34.9411
Klf4_BIN_161	Klf4_BIN_235	55839978	55843978	55841978	6.0069	64.3068	4.87242	29.2917	5.15045	35.5173
Klf4_BIN_161	Klf4_BIN_236	55843978	55847978	55845978	5.93971	61.3807	4.98331	31.632	5.16631	35.91
Klf4_BIN_161	Klf4_BIN_237	55847978	55851978	55849978	5.8551	57.8844	4.88074	29.4612	4.89194	29.6908
Klf4_BIN_161	Klf4_BIN_238	55851978	55855978	55853978	5.86327	58.2132	4.77778	27.4319	4.81145	28.0796
Klf4_BIN_161	Klf4_BIN_239	55855978	55859978	55857978	5.86327	58.2132	4.77778	27.4319	4.81145	28.0796
Klf4_BIN_161	Klf4_BIN_240	55859978	55863978	55861978	5.63517	49.6997	4.71216	26.212	4.59263	24.1279
Klf4_BIN_161	Klf4_BIN_241	55863978	55867978	55865978	5.9287	60.9139	4.80214	27.899	4.72451	26.4374
Klf4_BIN_161	Klf4_BIN_242	55867978	55871978	55869978	6.01281	64.5706	4.70327	26.051	4.93149	30.5158
Klf4_BIN_161	Klf4_BIN_243	55871978	55875978	55873978	5.81415	56.2643	4.50564	22.716	4.87763	29.3976
Klf4_BIN_161	Klf4_BIN_244	55875978	55879978	55877978	5.89496	59.5059	4.64287	24.9829	4.68872	25.7896
Klf4_BIN_161	Klf4_BIN_245	55879978	55883978	55881978	5.77711	54.8384	4.58247	23.9586	4.44595	21.7954
Klf4_BIN_161	Klf4_BIN_246	55883978	55887978	55885978	5.77711	54.8384	4.58247	23.9586	4.44595	21.7954
