# Supplementary material for: YY1 and CTCF orchestrate a 3D chromatin looping switch during early neural lineage commitment
Source: HighWire-hosted journal article supplement (doi:10.1101/gr.215160.116), 2017-05-23
Supplement: Supplemental_custom_scripts_5C_analysis.zip [file Nes_4C_Track.xlsx]

## Sheet: Sheet1
Nes gene: chr3:87,775,015-87,784,373				Nestin bins 122,123,124			Starting with bin 122 b/c where TSS is
	87773087	87777087
					pNPC 1		ES Serum 1		ES 2i 1
Bin of Interest	Other Bin	Other Bin Start	Other Bin Stop	Other Bin Middle	log2(Relative Interaction Frequency)	Relative Interaction Frequency	log2(Relative Interaction Frequency)	Relative Interaction Frequency	log2(Relative Interaction Frequency)	Relative Interaction Frequency
Nestin_BIN_122	Nestin_BIN_000	87285087	87289087	87287087	3.74844	13.4398	3.65187	12.5696	4.80443	27.9432
Nestin_BIN_122	Nestin_BIN_001	87289087	87293087	87291087	3.74844	13.4398	3.65187	12.5696	4.80443	27.9432
Nestin_BIN_122	Nestin_BIN_002	87293087	87297087	87295087	3.74844	13.4398	3.65187	12.5696	4.80443	27.9432
Nestin_BIN_122	Nestin_BIN_003	87297087	87301087	87299087	3.99671	15.9636	3.84076	14.3279	4.36222	20.5665
Nestin_BIN_122	Nestin_BIN_004	87301087	87305087	87303087	3.99671	15.9636	3.84076	14.3279	4.36222	20.5665
Nestin_BIN_122	Nestin_BIN_005	87305087	87309087	87307087	4.64829	25.077	3.64492	12.5092	4.25292	19.0658
Nestin_BIN_122	Nestin_BIN_006	87309087	87313087	87311087	4.64829	25.077	3.64492	12.5092	4.25292	19.0658
Nestin_BIN_122	Nestin_BIN_007	87313087	87317087	87315087	4.63664	24.8752	3.18061	9.06693	4.11319	17.3058
Nestin_BIN_122	Nestin_BIN_008	87317087	87321087	87319087	4.63664	24.8752	3.18061	9.06693	4.11319	17.3058
Nestin_BIN_122	Nestin_BIN_009	87321087	87325087	87323087	4.63664	24.8752	3.18061	9.06693	4.11319	17.3058
Nestin_BIN_122	Nestin_BIN_010	87325087	87329087	87327087	4.63664	24.8752	3.18061	9.06693	4.11319	17.3058
Nestin_BIN_122	Nestin_BIN_011	87329087	87333087	87331087	4.22167	18.6573	3.10104	8.58037	3.64056	12.4715
Nestin_BIN_122	Nestin_BIN_012	87333087	87337087	87335087	4.22167	18.6573	3.10104	8.58037	3.64056	12.4715
Nestin_BIN_122	Nestin_BIN_013	87337087	87341087	87339087	3.14242	8.83004	2.5821	5.98813	3.2891	9.77501
Nestin_BIN_122	Nestin_BIN_014	87341087	87345087	87343087	3.43662	10.8275	2.96935	7.83184	3.7554	13.5048
Nestin_BIN_122	Nestin_BIN_015	87345087	87349087	87347087	3.43662	10.8275	2.96935	7.83184	3.7554	13.5048
Nestin_BIN_122	Nestin_BIN_016	87349087	87353087	87351087	3.0441	8.24831	2.90351	7.48243	3.81281	14.0531
Nestin_BIN_122	Nestin_BIN_017	87353087	87357087	87355087	3.32101	9.99365	3.48339	11.1842	4.25141	19.0459
Nestin_BIN_122	Nestin_BIN_018	87357087	87361087	87359087	4.23069	18.7743	4.26295	19.1989	4.84816	28.8032
Nestin_BIN_122	Nestin_BIN_019	87361087	87365087	87363087	4.33352	20.1613	4.52251	22.9832	4.92824	30.4473
Nestin_BIN_122	Nestin_BIN_020	87365087	87369087	87367087	4.33352	20.1613	4.52251	22.9832	4.92824	30.4473
Nestin_BIN_122	Nestin_BIN_021	87369087	87373087	87371087	4.7922	27.7074	4.40185	21.1391	4.72789	26.4994
Nestin_BIN_122	Nestin_BIN_022	87373087	87377087	87375087	4.7922	27.7074	4.40185	21.1391	4.72789	26.4994
Nestin_BIN_122	Nestin_BIN_023	87377087	87381087	87379087	3.91114	15.0442	3.71596	13.1406	4.31622	19.921
Nestin_BIN_122	Nestin_BIN_024	87381087	87385087	87383087	3.64522	12.5118	4.01996	16.2229	4.42808	21.527
Nestin_BIN_122	Nestin_BIN_025	87385087	87389087	87387087	3.07173	8.40779	3.82901	14.2118	4.27817	19.4025
Nestin_BIN_122	Nestin_BIN_026	87389087	87393087	87391087	3.07173	8.40779	3.82901	14.2118	4.27817	19.4025
Nestin_BIN_122	Nestin_BIN_027	87393087	87397087	87395087	nan		nan		nan
Nestin_BIN_122	Nestin_BIN_028	87397087	87401087	87399087	nan		nan		nan
Nestin_BIN_122	Nestin_BIN_029	87401087	87405087	87403087	nan		nan		nan
Nestin_BIN_122	Nestin_BIN_030	87405087	87409087	87407087	nan		nan		nan
Nestin_BIN_122	Nestin_BIN_031	87409087	87413087	87411087	nan		nan		nan
Nestin_BIN_122	Nestin_BIN_032	87413087	87417087	87415087	5.20112	36.7868	3.89678	14.8953	3.91848	15.1209
Nestin_BIN_122	Nestin_BIN_033	87417087	87421087	87419087	4.45613	21.9497	3.78845	13.8177	4.54313	23.3141
Nestin_BIN_122	Nestin_BIN_034	87421087	87425087	87423087	4.59272	24.1294	3.91966	15.1334	4.28783	19.5329
Nestin_BIN_122	Nestin_BIN_035	87425087	87429087	87427087	4.43719	21.6634	4.11984	17.3859	4.44308	21.7521
Nestin_BIN_122	Nestin_BIN_036	87429087	87433087	87431087	4.43719	21.6634	4.11984	17.3859	4.44308	21.7521
Nestin_BIN_122	Nestin_BIN_037	87433087	87437087	87435087	4.18254	18.1581	4.1942	18.3054	4.61795	24.5551
Nestin_BIN_122	Nestin_BIN_038	87437087	87441087	87439087	3.97058	15.677	4.72038	26.3619	4.90883	30.0403
Nestin_BIN_122	Nestin_BIN_039	87441087	87445087	87443087	3.97058	15.677	4.72038	26.3619	4.90883	30.0403
Nestin_BIN_122	Nestin_BIN_040	87445087	87449087	87447087	3.97058	15.677	4.72038	26.3619	4.90883	30.0403
Nestin_BIN_122	Nestin_BIN_041	87449087	87453087	87451087	5.78808	55.2568	4.3238	20.0259	5.90876	60.0778
Nestin_BIN_122	Nestin_BIN_042	87453087	87457087	87455087	5.78808	55.2568	4.3238	20.0259	5.90876	60.0778
Nestin_BIN_122	Nestin_BIN_043	87457087	87461087	87459087	5.78808	55.2568	4.3238	20.0259	5.90876	60.0778
Nestin_BIN_122	Nestin_BIN_044	87461087	87465087	87463087	5.56776	47.4312	4.55619	23.5261	5.28802	39.0707
Nestin_BIN_122	Nestin_BIN_045	87465087	87469087	87467087	5.56776	47.4312	4.55619	23.5261	5.28802	39.0707
Nestin_BIN_122	Nestin_BIN_046	87469087	87473087	87471087	4.83931	28.6271	4.29598	19.6435	4.95654	31.0505
Nestin_BIN_122	Nestin_BIN_047	87473087	87477087	87475087	4.83931	28.6271	4.29598	19.6435	4.95654	31.0505
Nestin_BIN_122	Nestin_BIN_048	87477087	87481087	87479087	4.81622	28.1726	4.4049	21.184	4.81954	28.2375
Nestin_BIN_122	Nestin_BIN_049	87481087	87485087	87483087	4.31677	19.9286	4.64455	25.0121	4.7304	26.5456
Nestin_BIN_122	Nestin_BIN_050	87485087	87489087	87487087	4.31677	19.9286	4.64455	25.0121	4.7304	26.5456
Nestin_BIN_122	Nestin_BIN_051	87489087	87493087	87491087	4.30957	19.8294	5.06514	33.478	4.47269	22.2031
Nestin_BIN_122	Nestin_BIN_052	87493087	87497087	87495087	4.30957	19.8294	5.06514	33.478	4.47269	22.2031
Nestin_BIN_122	Nestin_BIN_053	87497087	87501087	87499087	3.84909	14.4109	5.50753	45.4917	4.39986	21.11
Nestin_BIN_122	Nestin_BIN_054	87501087	87505087	87503087	5.08417	33.9225	4.46622	22.1038	5.92297	60.6726
Nestin_BIN_122	Nestin_BIN_055	87505087	87509087	87507087	5.08417	33.9225	4.46622	22.1038	5.92297	60.6726
Nestin_BIN_122	Nestin_BIN_056	87509087	87513087	87511087	5.08417	33.9225	4.46622	22.1038	5.92297	60.6726
Nestin_BIN_122	Nestin_BIN_057	87513087	87517087	87515087	5.08417	33.9225	4.46622	22.1038	5.92297	60.6726
Nestin_BIN_122	Nestin_BIN_058	87517087	87521087	87519087	4.4334	21.6066	4.75896	27.0763	5.06678	33.516
Nestin_BIN_122	Nestin_BIN_059	87521087	87525087	87523087	4.4334	21.6066	4.75896	27.0763	5.06678	33.516
Nestin_BIN_122	Nestin_BIN_060	87525087	87529087	87527087	4.4334	21.6066	4.75896	27.0763	5.06678	33.516
Nestin_BIN_122	Nestin_BIN_061	87529087	87533087	87531087	3.78263	13.7621	5.0517	33.1676	4.21058	18.5144
Nestin_BIN_122	Nestin_BIN_062	87533087	87537087	87535087	4.53031	23.1078	4.953	30.9743	4.97194	31.3836
Nestin_BIN_122	Nestin_BIN_063	87537087	87541087	87539087	5.27799	38.8001	4.8543	28.926	5.7333	53.1978
Nestin_BIN_122	Nestin_BIN_064	87541087	87545087	87543087	5.27799	38.8001	4.8543	28.926	5.7333	53.1978
Nestin_BIN_122	Nestin_BIN_065	87545087	87549087	87547087	5.91657	60.4038	5.08457	33.9318	6.27159	77.257
Nestin_BIN_122	Nestin_BIN_066	87549087	87553087	87551087	6.55515	94.0365	5.31484	39.8038	6.80989	112.197
Nestin_BIN_122	Nestin_BIN_067	87553087	87557087	87555087	6.55515	94.0365	5.31484	39.8038	6.80989	112.197
Nestin_BIN_122	Nestin_BIN_068	87557087	87561087	87559087	6.07216	67.2823	5.38707	41.8474	6.18594	72.804
Nestin_BIN_122	Nestin_BIN_069	87561087	87565087	87563087	6.07216	67.2823	5.38707	41.8474	6.18594	72.804
Nestin_BIN_122	Nestin_BIN_070	87565087	87569087	87567087	6.19336	73.1794	5.52064	45.9069	6.34565	81.3262
Nestin_BIN_122	Nestin_BIN_071	87569087	87573087	87571087	6.19336	73.1794	5.52064	45.9069	6.34565	81.3262
Nestin_BIN_122	Nestin_BIN_072	87573087	87577087	87575087	5.86491	58.2791	5.58001	47.8354	6.28095	77.7596
Nestin_BIN_122	Nestin_BIN_073	87577087	87581087	87579087	6.00278	64.1233	5.64036	49.8791	6.64042	99.7624
Nestin_BIN_122	Nestin_BIN_074	87581087	87585087	87583087	5.825	56.6893	5.8209	56.5284	6.36041	82.1625
Nestin_BIN_122	Nestin_BIN_075	87585087	87589087	87587087	5.51962	45.8743	5.83746	57.1809	6.20809	73.9299
Nestin_BIN_122	Nestin_BIN_076	87589087	87593087	87591087	5.51962	45.8743	5.83746	57.1809	6.20809	73.9299
Nestin_BIN_122	Nestin_BIN_077	87593087	87597087	87595087	5.59914	48.4742	5.81104	56.1433	6.44346	87.0314
Nestin_BIN_122	Nestin_BIN_078	87597087	87601087	87599087	5.26939	38.5695	5.86939	58.4603	6.23777	75.4665
Nestin_BIN_122	Nestin_BIN_079	87601087	87605087	87603087	5.49964	45.2436	5.66714	50.8136	6.22894	75.0063
Nestin_BIN_122	Nestin_BIN_080	87605087	87609087	87607087	5.49964	45.2436	5.66714	50.8136	6.22894	75.0063
Nestin_BIN_122	Nestin_BIN_081	87609087	87613087	87611087	5.49964	45.2436	5.66714	50.8136	6.22894	75.0063
Nestin_BIN_122	Nestin_BIN_082	87613087	87617087	87615087	5.37036	41.3657	5.62161	49.2351	5.8863	59.1497
Nestin_BIN_122	Nestin_BIN_083	87617087	87621087	87619087	5.74107	53.4852	5.28785	39.0663	6.06435	66.9191
Nestin_BIN_122	Nestin_BIN_084	87621087	87625087	87623087	5.74107	53.4852	5.28785	39.0663	6.06435	66.9191
Nestin_BIN_122	Nestin_BIN_085	87625087	87629087	87627087	5.74107	53.4852	5.28785	39.0663	6.06435	66.9191
Nestin_BIN_122	Nestin_BIN_086	87629087	87633087	87631087	5.22786	37.4752	5.28001	38.8546	5.97617	62.9514
Nestin_BIN_122	Nestin_BIN_087	87633087	87637087	87635087	5.35224	40.8493	5.30023	39.4028	6.10124	68.6523
Nestin_BIN_122	Nestin_BIN_088	87637087	87641087	87639087	5.57557	47.6886	5.213	37.0911	6.22386	74.7424
Nestin_BIN_122	Nestin_BIN_089	87641087	87645087	87643087	5.66013	50.5671	5.28385	38.9581	6.18021	72.5152
Nestin_BIN_122	Nestin_BIN_090	87645087	87649087	87647087	5.75275	53.92	5.18837	36.4632	6.37581	83.0446
Nestin_BIN_122	Nestin_BIN_091	87649087	87653087	87651087	5.82863	56.8318	5.11223	34.5886	6.38803	83.7509
Nestin_BIN_122	Nestin_BIN_092	87653087	87657087	87655087	5.82863	56.8318	5.11223	34.5886	6.38803	83.7509
Nestin_BIN_122	Nestin_BIN_093	87657087	87661087	87659087	5.63761	49.7841	4.88291	29.5054	5.79266	55.4324
Nestin_BIN_122	Nestin_BIN_094	87661087	87665087	87663087	5.33363	40.3258	4.8487	28.814	5.39313	42.0237
Nestin_BIN_122	Nestin_BIN_095	87665087	87669087	87667087	5.77286	54.6768	5.13978	35.2555	5.25607	38.2151
Nestin_BIN_122	Nestin_BIN_096	87669087	87673087	87671087	5.77286	54.6768	5.13978	35.2555	5.25607	38.2151
Nestin_BIN_122	Nestin_BIN_097	87673087	87677087	87675087	6.29013	78.256	5.85529	57.8918	5.91024	60.1393
Nestin_BIN_122	Nestin_BIN_098	87677087	87681087	87679087	6.29013	78.256	5.85529	57.8918	5.91024	60.1393
Nestin_BIN_122	Nestin_BIN_099	87681087	87685087	87683087	7.20129	147.165	6.4909	89.9407	6.62333	98.5876
Nestin_BIN_122	Nestin_BIN_100	87685087	87689087	87687087	8.11245	276.753	7.12652	139.732	7.33643	161.617
Nestin_BIN_122	Nestin_BIN_101	87689087	87693087	87691087	8.11245	276.753	7.12652	139.732	7.33643	161.617
Nestin_BIN_122	Nestin_BIN_102	87693087	87697087	87695087	8.11245	276.753	7.12652	139.732	7.33643	161.617
Nestin_BIN_122	Nestin_BIN_103	87697087	87701087	87699087	7.03675	131.302	6.52263	91.9404	6.32141	79.971
Nestin_BIN_122	Nestin_BIN_104	87701087	87705087	87703087	5.96104	62.2949	5.91874	60.4947	5.30638	39.5712
Nestin_BIN_122	Nestin_BIN_105	87705087	87709087	87707087	6.99851	127.868	6.29212	78.3639	6.32323	80.0724
Nestin_BIN_122	Nestin_BIN_106	87709087	87713087	87711087	6.99851	127.868	6.29212	78.3639	6.32323	80.0724
Nestin_BIN_122	Nestin_BIN_107	87713087	87717087	87715087	7.18924	145.941	6.98338	126.534	6.73034	106.178
Nestin_BIN_122	Nestin_BIN_108	87717087	87721087	87719087	7.18924	145.941	6.98338	126.534	6.73034	106.178
Nestin_BIN_122	Nestin_BIN_109	87721087	87725087	87723087	7.34747	162.858	7.27534	154.916	7.0593	133.371
Nestin_BIN_122	Nestin_BIN_110	87725087	87729087	87727087	7.34747	162.858	7.27534	154.916	7.0593	133.371
Nestin_BIN_122	Nestin_BIN_111	87729087	87733087	87731087	7.86425	233.01	7.13614	140.667	7.38999	167.73
Nestin_BIN_122	Nestin_BIN_112	87733087	87737087	87735087	8.20484	295.054	7.26497	153.806	7.71619	210.283
Nestin_BIN_122	Nestin_BIN_113	87737087	87741087	87739087	7.89901	238.692	6.98855	126.988	7.1054	137.702
Nestin_BIN_122	Nestin_BIN_114	87741087	87745087	87743087	7.89901	238.692	6.98855	126.988	7.1054	137.702
Nestin_BIN_122	Nestin_BIN_115	87745087	87749087	87747087	nan		nan		nan
Nestin_BIN_122	Nestin_BIN_116	87749087	87753087	87751087	8.38961	335.369	7.17635	144.643	7.57849	191.14
Nestin_BIN_122	Nestin_BIN_117	87753087	87757087	87755087	8.38961	335.369	7.17635	144.643	7.57849	191.14
Nestin_BIN_122	Nestin_BIN_118	87757087	87761087	87759087	8.38961	335.369	7.17635	144.643	7.57849	191.14
Nestin_BIN_122	Nestin_BIN_119	87761087	87765087	87763087	8.38961	335.369	7.17635	144.643	7.57849	191.14
Nestin_BIN_122	Nestin_BIN_120	87765087	87769087	87767087	9.09455	546.677	7.63973	199.429	7.70874	209.2
Nestin_BIN_122	Nestin_BIN_121	87769087	87773087	87771087	nan		nan		nan
Nestin_BIN_122	Nestin_BIN_122	87773087	87777087	87775087	nan		nan		nan
Nestin_BIN_122	Nestin_BIN_123	87777087	87781087	87779087	nan		nan		nan
Nestin_BIN_122	Nestin_BIN_124	87781087	87785087	87783087	nan		nan		nan
Nestin_BIN_122	Nestin_BIN_125	87785087	87789087	87787087	9.56216	755.956	9.56216	755.956	9.23279	601.654
Nestin_BIN_122	Nestin_BIN_126	87789087	87793087	87791087	9.56216	755.956	9.56216	755.956	9.23279	601.654
Nestin_BIN_122	Nestin_BIN_127	87793087	87797087	87795087	9.56216	755.956	9.56216	755.956	9.23279	601.654
Nestin_BIN_122	Nestin_BIN_128	87797087	87801087	87799087	8.95529	496.376	8.2192	298.007	8.17757	289.529
Nestin_BIN_122	Nestin_BIN_129	87801087	87805087	87803087	8.95529	496.376	8.2192	298.007	8.17757	289.529
Nestin_BIN_122	Nestin_BIN_130	87805087	87809087	87807087	8.65186	402.224	7.54773	187.108	7.64995	200.847
Nestin_BIN_122	Nestin_BIN_131	87809087	87813087	87811087	8.65186	402.224	7.54773	187.108	7.64995	200.847
Nestin_BIN_122	Nestin_BIN_132	87813087	87817087	87815087	7.88878	237.005	7.68433	205.69	7.88878	237.005
Nestin_BIN_122	Nestin_BIN_133	87817087	87821087	87819087	7.67477	204.332	7.44455	174.194	7.27221	154.58
Nestin_BIN_122	Nestin_BIN_134	87821087	87825087	87823087	7.67477	204.332	7.44455	174.194	7.27221	154.58
Nestin_BIN_122	Nestin_BIN_135	87825087	87829087	87827087	7.67477	204.332	7.44455	174.194	7.27221	154.58
Nestin_BIN_122	Nestin_BIN_136	87829087	87833087	87831087	7.46077	176.163	7.20478	147.521	6.65565	100.821
Nestin_BIN_122	Nestin_BIN_137	87833087	87837087	87835087	7.9723	251.131	6.48904	89.8245	6.9345	122.319
Nestin_BIN_122	Nestin_BIN_138	87837087	87841087	87839087	7.9723	251.131	6.48904	89.8245	6.9345	122.319
Nestin_BIN_122	Nestin_BIN_139	87841087	87845087	87843087	7.9723	251.131	6.48904	89.8245	6.9345	122.319
Nestin_BIN_122	Nestin_BIN_140	87845087	87849087	87847087	7.79015	221.344	6.37827	83.186	6.92387	121.421
Nestin_BIN_122	Nestin_BIN_141	87849087	87853087	87851087	7.59012	192.687	6.24718	75.9606	6.64016	99.7441
Nestin_BIN_122	Nestin_BIN_142	87853087	87857087	87855087	7.59012	192.687	6.24718	75.9606	6.64016	99.7441
Nestin_BIN_122	Nestin_BIN_143	87857087	87861087	87859087	7.39903	168.783	6.12625	69.853	6.49299	90.0707
Nestin_BIN_122	Nestin_BIN_144	87861087	87865087	87863087	7.39369	168.159	6.36037	82.1601	6.78966	110.635
Nestin_BIN_122	Nestin_BIN_145	87865087	87869087	87867087	7.28653	156.122	6.4068	84.8473	6.72787	105.996
Nestin_BIN_122	Nestin_BIN_146	87869087	87873087	87871087	8.20104	294.279	7.09016	136.254	6.95309	123.905
Nestin_BIN_122	Nestin_BIN_147	87873087	87877087	87875087	7.99526	255.16	7.06283	133.697	6.63705	99.5295
Nestin_BIN_122	Nestin_BIN_148	87877087	87881087	87879087	8.00437	256.777	7.00234	128.208	6.66172	101.246
Nestin_BIN_122	Nestin_BIN_149	87881087	87885087	87883087	8.15971	285.969	7.04578	132.126	6.4814	89.3502
Nestin_BIN_122	Nestin_BIN_150	87885087	87889087	87887087	7.61009	195.373	6.61961	98.3335	6.25495	76.3707
Nestin_BIN_122	Nestin_BIN_151	87889087	87893087	87891087	7.37837	166.384	6.38247	83.4287	6.24744	75.9742
Nestin_BIN_122	Nestin_BIN_152	87893087	87897087	87895087	7.37861	166.411	6.08329	67.8036	6.5267	92.2001
Nestin_BIN_122	Nestin_BIN_153	87897087	87901087	87899087	7.37861	166.411	6.08329	67.8036	6.5267	92.2001
Nestin_BIN_122	Nestin_BIN_154	87901087	87905087	87903087	7.34486	162.564	5.97117	62.7337	6.47311	88.8383
Nestin_BIN_122	Nestin_BIN_155	87905087	87909087	87907087	7.08366	135.642	6.04424	65.9929	6.53401	92.6686
Nestin_BIN_122	Nestin_BIN_156	87909087	87913087	87911087	7.08366	135.642	6.04424	65.9929	6.53401	92.6686
Nestin_BIN_122	Nestin_BIN_157	87913087	87917087	87915087	7.2673	154.055	6.36326	82.3252	6.65451	100.741
Nestin_BIN_122	Nestin_BIN_158	87917087	87921087	87919087	6.56126	94.4358	6.19037	73.0278	6.65581	100.832
Nestin_BIN_122	Nestin_BIN_159	87921087	87925087	87923087	6.56126	94.4358	6.19037	73.0278	6.65581	100.832
Nestin_BIN_122	Nestin_BIN_160	87925087	87929087	87927087	6.56126	94.4358	6.19037	73.0278	6.65581	100.832
Nestin_BIN_122	Nestin_BIN_161	87929087	87933087	87931087	6.84228	114.745	5.66874	50.8699	5.83776	57.1927
Nestin_BIN_122	Nestin_BIN_162	87933087	87937087	87935087	6.84228	114.745	5.66874	50.8699	5.83776	57.1927
Nestin_BIN_122	Nestin_BIN_163	87937087	87941087	87939087	6.60404	97.2777	5.0735	33.6726	4.84727	28.7855
Nestin_BIN_122	Nestin_BIN_164	87941087	87945087	87943087	6.60404	97.2777	5.0735	33.6726	4.84727	28.7855
Nestin_BIN_122	Nestin_BIN_165	87945087	87949087	87947087	6.60404	97.2777	5.0735	33.6726	4.84727	28.7855
Nestin_BIN_122	Nestin_BIN_166	87949087	87953087	87951087	6.36579	82.4697	4.47827	22.2891	3.85678	14.4879
Nestin_BIN_122	Nestin_BIN_167	87953087	87957087	87955087	6.98393	126.582	6.15099	71.0611	6.69187	103.384
Nestin_BIN_122	Nestin_BIN_168	87957087	87961087	87959087	6.98393	126.582	6.15099	71.0611	6.69187	103.384
Nestin_BIN_122	Nestin_BIN_169	87961087	87965087	87963087	6.98393	126.582	6.15099	71.0611	6.69187	103.384
Nestin_BIN_122	Nestin_BIN_170	87965087	87969087	87967087	6.98393	126.582	6.15099	71.0611	6.69187	103.384
Nestin_BIN_122	Nestin_BIN_171	87969087	87973087	87971087	6.98393	126.582	6.15099	71.0611	6.69187	103.384
Nestin_BIN_122	Nestin_BIN_172	87973087	87977087	87975087	6.98393	126.582	6.15099	71.0611	6.69187	103.384
Nestin_BIN_122	Nestin_BIN_173	87977087	87981087	87979087	6.98393	126.582	6.15099	71.0611	6.69187	103.384
Nestin_BIN_122	Nestin_BIN_174	87981087	87985087	87983087	6.98393	126.582	6.15099	71.0611	6.69187	103.384
Nestin_BIN_122	Nestin_BIN_175	87985087	87989087	87987087	6.89987	119.417	5.90827	60.0572	6.07357	67.3482
Nestin_BIN_122	Nestin_BIN_176	87989087	87993087	87991087	6.81581	112.658	5.66555	50.7574	5.45526	43.873
Nestin_BIN_122	Nestin_BIN_177	87993087	87997087	87995087	6.81581	112.658	5.66555	50.7574	5.45526	43.873
Nestin_BIN_122	Nestin_BIN_178	87997087	88001087	87999087	6.81581	112.658	5.66555	50.7574	5.45526	43.873
Nestin_BIN_122	Nestin_BIN_179	88001087	88005087	88003087	nan		nan		nan
Nestin_BIN_122	Nestin_BIN_180	88005087	88009087	88007087	nan		nan		nan
Nestin_BIN_122	Nestin_BIN_181	88009087	88013087	88011087	6.80954	112.169	4.9526	30.9656	5.37928	41.6222
Nestin_BIN_122	Nestin_BIN_182	88013087	88017087	88015087	7.46636	176.847	5.56226	47.2506	5.3528	40.8653
Nestin_BIN_122	Nestin_BIN_183	88017087	88021087	88019087	7.46636	176.847	5.56226	47.2506	5.3528	40.8653
Nestin_BIN_122	Nestin_BIN_184	88021087	88025087	88023087	7.60951	195.295	5.62216	49.2537	5.22311	37.3519
Nestin_BIN_122	Nestin_BIN_185	88025087	88029087	88027087	7.60951	195.295	5.62216	49.2537	5.22311	37.3519
Nestin_BIN_122	Nestin_BIN_186	88029087	88033087	88031087	7.51049	182.341	5.6898	51.6178	4.8507	28.854
Nestin_BIN_122	Nestin_BIN_187	88033087	88037087	88035087	7.20415	147.457	5.44873	43.6748	4.61289	24.4691
Nestin_BIN_122	Nestin_BIN_188	88037087	88041087	88039087	6.51249	91.2968	5.15551	35.642	4.26205	19.1869
Nestin_BIN_122	Nestin_BIN_189	88041087	88045087	88043087	6.74992	107.629	4.97724	31.4991	4.86826	29.2074
Nestin_BIN_122	Nestin_BIN_190	88045087	88049087	88047087	6.53657	92.8334	5.00358	32.0794	5.25196	38.1065
Nestin_BIN_122	Nestin_BIN_191	88049087	88053087	88051087	6.54861	93.6113	4.92761	30.434	5.74692	53.7026
Nestin_BIN_122	Nestin_BIN_192	88053087	88057087	88055087	6.34479	81.2778	5.37331	41.4502	5.74598	53.6678
Nestin_BIN_122	Nestin_BIN_193	88057087	88061087	88059087	6.02351	65.0514	5.66047	50.5792	5.88174	58.963
Nestin_BIN_122	Nestin_BIN_194	88061087	88065087	88063087	5.93715	61.2716	6.26469	76.8884	5.74411	53.5982
Nestin_BIN_122	Nestin_BIN_195	88065087	88069087	88067087	5.93715	61.2716	6.26469	76.8884	5.74411	53.5982
Nestin_BIN_122	Nestin_BIN_196	88069087	88073087	88071087	nan		nan		nan
Nestin_BIN_122	Nestin_BIN_197	88073087	88077087	88075087	nan		nan		nan
Nestin_BIN_122	Nestin_BIN_198	88077087	88081087	88079087	nan		nan		nan
Nestin_BIN_122	Nestin_BIN_199	88081087	88085087	88083087	nan		nan		nan
Nestin_BIN_122	Nestin_BIN_200	88085087	88089087	88087087	6.62993	99.0392	5.07818	33.782	6.03128	65.4026
Nestin_BIN_122	Nestin_BIN_201	88089087	88093087	88091087	6.62993	99.0392	5.07818	33.782	6.03128	65.4026
Nestin_BIN_122	Nestin_BIN_202	88093087	88097087	88095087	6.62993	99.0392	5.07818	33.782	6.03128	65.4026
Nestin_BIN_122	Nestin_BIN_203	88097087	88101087	88099087	6.62993	99.0392	5.07818	33.782	6.03128	65.4026
Nestin_BIN_122	Nestin_BIN_204	88101087	88105087	88103087	6.58113	95.7452	4.3062	19.7832	6.17977	72.4932
Nestin_BIN_122	Nestin_BIN_205	88105087	88109087	88107087	5.79322	55.4541	4.57315	23.8043	5.63691	49.7598
Nestin_BIN_122	Nestin_BIN_206	88109087	88113087	88111087	5.59706	48.4042	4.35042	20.399	5.22417	37.3794
Nestin_BIN_122	Nestin_BIN_207	88113087	88117087	88115087	5.10503	34.4165	4.37254	20.714	4.74637	26.8411
Nestin_BIN_122	Nestin_BIN_208	88117087	88121087	88119087	5.10503	34.4165	4.37254	20.714	4.74637	26.8411
Nestin_BIN_122	Nestin_BIN_209	88121087	88125087	88123087	5.10503	34.4165	4.37254	20.714	4.74637	26.8411
Nestin_BIN_122	Nestin_BIN_210	88125087	88129087	88127087	5.20474	36.8793	3.90498	14.9801	4.3987	21.0931
Nestin_BIN_122	Nestin_BIN_211	88129087	88133087	88131087	5.20474	36.8793	3.90498	14.9801	4.3987	21.0931
Nestin_BIN_122	Nestin_BIN_212	88133087	88137087	88135087	5.78038	54.9625	4.0994	17.1412	4.06168	16.6989
Nestin_BIN_122	Nestin_BIN_213	88137087	88141087	88139087	5.74738	53.7197	3.42208	10.7189	4.53973	23.2592
Nestin_BIN_122	Nestin_BIN_214	88141087	88145087	88143087	5.90206	59.7996	4.01853	16.2068	4.5616	23.6145
Nestin_BIN_122	Nestin_BIN_215	88145087	88149087	88147087	5.90206	59.7996	4.01853	16.2068	4.5616	23.6145
Nestin_BIN_122	Nestin_BIN_216	88149087	88153087	88151087	5.87861	58.8352	4.04736	16.5339	4.51797	22.911
Nestin_BIN_122	Nestin_BIN_217	88153087	88157087	88155087	5.55839	47.1241	4.43429	21.62	4.5638	23.6504
Nestin_BIN_122	Nestin_BIN_218	88157087	88161087	88159087	5.55839	47.1241	4.43429	21.62	4.5638	23.6504
Nestin_BIN_122	Nestin_BIN_219	88161087	88165087	88163087	5.23187	37.5794	4.04572	16.5152	4.54302	23.3123
Nestin_BIN_122	Nestin_BIN_220	88165087	88169087	88167087	5.23187	37.5794	4.04572	16.5152	4.54302	23.3123
Nestin_BIN_122	Nestin_BIN_221	88169087	88173087	88171087	nan		nan		nan
Nestin_BIN_122	Nestin_BIN_222	88173087	88177087	88175087	nan		nan		nan
Nestin_BIN_122	Nestin_BIN_223	88177087	88181087	88179087	nan		nan		nan
Nestin_BIN_122	Nestin_BIN_224	88181087	88185087	88183087	nan		nan		nan
Nestin_BIN_122	Nestin_BIN_225	88185087	88189087	88187087	5.64822	50.1514	3.31171	9.92942	5.42545	42.9758
Nestin_BIN_122	Nestin_BIN_226	88189087	88193087	88191087	5.64822	50.1514	3.31171	9.92942	5.42545	42.9758
Nestin_BIN_122	Nestin_BIN_227	88193087	88197087	88195087	5.60381	48.6311	3.69542	12.9548	4.66823	25.426
Nestin_BIN_122	Nestin_BIN_228	88197087	88201087	88199087	5.35714	40.9882	4.00465	16.0516	4.45717	21.9656
Nestin_BIN_122	Nestin_BIN_229	88201087	88205087	88203087	5.21159	37.055	4.35112	20.4087	3.97304	15.7037
Nestin_BIN_122	Nestin_BIN_230	88205087	88209087	88207087	5.39655	42.1234	3.98347	15.8177	4.08886	17.0164
Nestin_BIN_122	Nestin_BIN_231	88209087	88213087	88211087	5.31513	39.8119	3.93564	15.3019	4.17778	18.0983
Nestin_BIN_122	Nestin_BIN_232	88213087	88217087	88215087	5.31513	39.8119	3.93564	15.3019	4.17778	18.0983
Nestin_BIN_122	Nestin_BIN_233	88217087	88221087	88219087	5.36299	41.1548	3.05621	8.31787	4.11288	17.3022
Nestin_BIN_122	Nestin_BIN_234	88221087	88225087	88223087	4.95952	31.1146	2.86424	7.28154	3.90527	14.9832
Nestin_BIN_122	Nestin_BIN_235	88225087	88229087	88227087	4.95952	31.1146	2.86424	7.28154	3.90527	14.9832
Nestin_BIN_122	Nestin_BIN_236	88229087	88233087	88231087	4.95952	31.1146	2.86424	7.28154	3.90527	14.9832
Nestin_BIN_122	Nestin_BIN_237	88233087	88237087	88235087	5.03409	32.7652	2.64587	6.25871	4.47187	22.1905
Nestin_BIN_122	Nestin_BIN_238	88237087	88241087	88239087	5.03409	32.7652	2.64587	6.25871	4.47187	22.1905
Nestin_BIN_122	Nestin_BIN_239	88241087	88245087	88243087	5.03409	32.7652	2.64587	6.25871	4.47187	22.1905
Nestin_BIN_122	Nestin_BIN_240	88245087	88249087	88247087	5.10866	34.5033	2.42749	5.37955	5.03847	32.8647
Nestin_BIN_122	Nestin_BIN_241	88249087	88253087	88251087	5.10866	34.5033	2.42749	5.37955	5.03847	32.8647
Nestin_BIN_122	Nestin_BIN_242	88253087	88257087	88255087	5.1709	36.0243	3.36897	10.3314	4.95713	31.0632
Nestin_BIN_122	Nestin_BIN_243	88257087	88261087	88259087	5.1709	36.0243	3.36897	10.3314	4.95713	31.0632
Nestin_BIN_122	Nestin_BIN_244	88261087	88265087	88263087	5.23313	37.6122	4.31045	19.8415	4.8758	29.3604
Nestin_BIN_122	Nestin_BIN_245	88265087	88269087	88267087	5.23313	37.6122	4.31045	19.8415	4.8758	29.3604
Nestin_BIN_122	Nestin_BIN_246	88269087	88273087	88271087	5.23313	37.6122	4.31045	19.8415	4.8758	29.3604
Nestin_BIN_122	Nestin_BIN_247	88273087	88277087	88275087	5.23313	37.6122	4.31045	19.8415	4.8758	29.3604
Nestin_BIN_122	Nestin_BIN_248	88277087	88281087	88279087	5.23313	37.6122	4.31045	19.8415	4.8758	29.3604
Nestin_BIN_122	Nestin_BIN_249	88281087	88285087	88283087	5.23313	37.6122	4.31045	19.8415	4.8758	29.3604
Nestin_BIN_122	Nestin_BIN_250	88285087	88289087	88287087	5.91554	60.3607	3.77933	13.7307	4.68863	25.788
Nestin_BIN_122	Nestin_BIN_251	88289087	88293087	88291087	5.62627	49.3943	3.31734	9.96826	3.97066	15.6779
Nestin_BIN_122	Nestin_BIN_252	88293087	88297087	88295087	5.53286	46.2974	3.64978	12.5514	3.61492	12.2518
Nestin_BIN_122	Nestin_BIN_253	88297087	88301087	88299087	5.53286	46.2974	3.64978	12.5514	3.61492	12.2518
Nestin_BIN_122	Nestin_BIN_254	88301087	88305087	88303087	5.49452	45.0831	3.70011	12.997	3.85472	14.4673
Nestin_BIN_122	Nestin_BIN_255	88305087	88309087	88307087	5.35417	40.9041	3.6737	12.7613	3.57675	11.9319
Nestin_BIN_122	Nestin_BIN_256	88309087	88313087	88311087	5.31082	39.6931	3.4235	10.7294	4.32912	20.1
Nestin_BIN_122	Nestin_BIN_257	88313087	88317087	88315087	5.31082	39.6931	3.4235	10.7294	4.32912	20.1
Nestin_BIN_122	Nestin_BIN_258	88317087	88321087	88319087	5.27649	38.7597	3.2097	9.25155	4.20662	18.4637
Nestin_BIN_122	Nestin_BIN_259	88321087	88325087	88323087	5.27649	38.7597	3.2097	9.25155	4.20662	18.4637
Nestin_BIN_122	Nestin_BIN_260	88325087	88329087	88327087	5.12708	34.9466	2.89115	7.41864	3.94604	15.4126
Nestin_BIN_122	Nestin_BIN_261	88329087	88333087	88331087	5.30212	39.4545	2.99532	7.97411	3.43524	10.8171
Nestin_BIN_122	Nestin_BIN_262	88333087	88337087	88335087	5.51825	45.831	3.25301	9.53351	3.59452	12.0798
Nestin_BIN_122	Nestin_BIN_263	88337087	88341087	88339087	5.51825	45.831	3.25301	9.53351	3.59452	12.0798
Nestin_BIN_122	Nestin_BIN_264	88341087	88345087	88343087	5.51825	45.831	3.25301	9.53351	3.59452	12.0798
Nestin_BIN_122	Nestin_BIN_265	88345087	88349087	88347087	5.89024	59.3115	3.59857	12.1137	4.22851	18.7459
Nestin_BIN_122	Nestin_BIN_266	88349087	88353087	88351087	5.89024	59.3115	3.59857	12.1137	4.22851	18.7459
Nestin_BIN_122	Nestin_BIN_267	88353087	88357087	88355087	5.89024	59.3115	3.59857	12.1137	4.22851	18.7459
Nestin_BIN_122	Nestin_BIN_268	88357087	88361087	88359087	6.0461	66.0779	3.68644	12.8745	4.70321	26.0499
Nestin_BIN_122	Nestin_BIN_269	88361087	88365087	88363087	6.0461	66.0779	3.68644	12.8745	4.70321	26.0499
Nestin_BIN_122	Nestin_BIN_270	88365087	88369087	88367087	6.0461	66.0779	3.68644	12.8745	4.70321	26.0499
