# Supplementary material for: YY1 and CTCF orchestrate a 3D chromatin looping switch during early neural lineage commitment
Source: HighWire-hosted journal article supplement (doi:10.1101/gr.215160.116), 2017-05-23
Supplement: Supplemental_custom_scripts_5C_analysis.zip [file Olig1_4C_Track.xlsx]

## Sheet: Sheet1
Olig1: chr16:91,270,014-91,272,184				bins 163-164, will choose bin 163
					pNPC 1	pNPC 1	ES Serum 1	ES Serum 1	ES 2i 1	ES 2i 1
Bin of Interest	Other Bin	Other Bin Start	Other Bin Stop	Other Bin Middle	log2(Relative Interaction Frequency)	Relative Interaction Frequency	log2(Relative Interaction Frequency)	Relative Interaction Frequency	log2(Relative Interaction Frequency)	Relative Interaction Frequency
Olig1-Olig2_BIN_163	Olig1-Olig2_BIN_000	90614612	90618612	90616612	3.8135	14.0597	3.77809	13.7189	4.48929	22.4601
Olig1-Olig2_BIN_163	Olig1-Olig2_BIN_001	90618612	90622612	90620612	3.8135	14.0597	3.77809	13.7189	4.48929	22.4601
Olig1-Olig2_BIN_163	Olig1-Olig2_BIN_002	90622612	90626612	90624612	4.70795	26.1356	3.57213	11.8937	4.82362	28.3175
Olig1-Olig2_BIN_163	Olig1-Olig2_BIN_003	90626612	90630612	90628612	4.70795	26.1356	3.57213	11.8937	4.82362	28.3175
Olig1-Olig2_BIN_163	Olig1-Olig2_BIN_004	90630612	90634612	90632612	4.51056	22.7937	3.4943	11.2691	4.99532	31.8963
Olig1-Olig2_BIN_163	Olig1-Olig2_BIN_005	90634612	90638612	90636612	4.51056	22.7937	3.4943	11.2691	4.99532	31.8963
Olig1-Olig2_BIN_163	Olig1-Olig2_BIN_006	90638612	90642612	90640612	4.80835	28.0194	3.34873	10.1875	5.38281	41.7242
Olig1-Olig2_BIN_163	Olig1-Olig2_BIN_007	90642612	90646612	90644612	4.38734	20.9277	4.12556	17.4549	4.64763	25.0655
Olig1-Olig2_BIN_163	Olig1-Olig2_BIN_008	90646612	90650612	90648612	4.38734	20.9277	4.12556	17.4549	4.64763	25.0655
Olig1-Olig2_BIN_163	Olig1-Olig2_BIN_009	90650612	90654612	90652612	4.10666	17.2278	4.64345	24.9929	4.15752	17.8458
Olig1-Olig2_BIN_163	Olig1-Olig2_BIN_010	90654612	90658612	90656612	4.10666	17.2278	4.64345	24.9929	4.15752	17.8458
Olig1-Olig2_BIN_163	Olig1-Olig2_BIN_011	90658612	90662612	90660612	4.10666	17.2278	4.64345	24.9929	4.15752	17.8458
Olig1-Olig2_BIN_163	Olig1-Olig2_BIN_012	90662612	90666612	90664612	4.3142	19.8931	4.17678	18.0857	4.15087	17.7638
Olig1-Olig2_BIN_163	Olig1-Olig2_BIN_013	90666612	90670612	90668612	4.38349	20.8719	3.7937	13.8681	3.78864	13.8195
Olig1-Olig2_BIN_163	Olig1-Olig2_BIN_014	90670612	90674612	90672612	4.52262	22.985	3.55875	11.784	3.84056	14.326
Olig1-Olig2_BIN_163	Olig1-Olig2_BIN_015	90674612	90678612	90676612	4.49597	22.5643	3.6922	12.926	3.95937	15.5556
Olig1-Olig2_BIN_163	Olig1-Olig2_BIN_016	90678612	90682612	90680612	4.49597	22.5643	3.6922	12.926	3.95937	15.5556
Olig1-Olig2_BIN_163	Olig1-Olig2_BIN_017	90682612	90686612	90684612	4.10766	17.2397	3.7568	13.518	3.97967	15.7761
Olig1-Olig2_BIN_163	Olig1-Olig2_BIN_018	90686612	90690612	90688612	4.55484	23.504	3.99905	15.9895	4.52215	22.9775
Olig1-Olig2_BIN_163	Olig1-Olig2_BIN_019	90690612	90694612	90692612	4.38938	20.9572	4.22601	18.7135	4.43459	21.6244
Olig1-Olig2_BIN_163	Olig1-Olig2_BIN_020	90694612	90698612	90696612	4.10742	17.2368	4.02628	16.2941	4.57981	23.9144
Olig1-Olig2_BIN_163	Olig1-Olig2_BIN_021	90698612	90702612	90700612	3.93121	15.255	4.00232	16.0258	4.7108	26.1874
Olig1-Olig2_BIN_163	Olig1-Olig2_BIN_022	90702612	90706612	90704612	3.65631	12.6084	3.86811	14.6021	4.87653	29.3752
Olig1-Olig2_BIN_163	Olig1-Olig2_BIN_023	90706612	90710612	90708612	3.65631	12.6084	3.86811	14.6021	4.87653	29.3752
Olig1-Olig2_BIN_163	Olig1-Olig2_BIN_024	90710612	90714612	90712612	3.65631	12.6084	3.86811	14.6021	4.87653	29.3752
Olig1-Olig2_BIN_163	Olig1-Olig2_BIN_025	90714612	90718612	90716612	3.63753	12.4453	3.96239	15.5883	4.92912	30.4657
Olig1-Olig2_BIN_163	Olig1-Olig2_BIN_026	90718612	90722612	90720612	4.93299	30.5477	3.59712	12.1016	5.54018	46.5329
Olig1-Olig2_BIN_163	Olig1-Olig2_BIN_027	90722612	90726612	90724612	4.93299	30.5477	3.59712	12.1016	5.54018	46.5329
Olig1-Olig2_BIN_163	Olig1-Olig2_BIN_028	90726612	90730612	90728612	4.05226	16.5903	3.40826	10.6167	4.85166	28.8731
Olig1-Olig2_BIN_163	Olig1-Olig2_BIN_029	90730612	90734612	90732612	4.39335	21.0151	3.41696	10.6809	4.8273	28.3897
Olig1-Olig2_BIN_163	Olig1-Olig2_BIN_030	90734612	90738612	90736612	4.39335	21.0151	3.41696	10.6809	4.8273	28.3897
Olig1-Olig2_BIN_163	Olig1-Olig2_BIN_031	90738612	90742612	90740612	4.12576	17.4573	3.6464	12.5221	4.74658	26.845
Olig1-Olig2_BIN_163	Olig1-Olig2_BIN_032	90742612	90746612	90744612	4.12446	17.4416	3.71742	13.1539	4.45822	21.9816
Olig1-Olig2_BIN_163	Olig1-Olig2_BIN_033	90746612	90750612	90748612	4.2893	19.5527	3.82618	14.1839	4.47462	22.2328
Olig1-Olig2_BIN_163	Olig1-Olig2_BIN_034	90750612	90754612	90752612	4.12307	17.4248	3.85443	14.4644	4.44292	21.7496
Olig1-Olig2_BIN_163	Olig1-Olig2_BIN_035	90754612	90758612	90756612	3.97334	15.707	3.90986	15.0309	4.39979	21.109
Olig1-Olig2_BIN_163	Olig1-Olig2_BIN_036	90758612	90762612	90760612	4.2331	18.8058	3.74851	13.4405	4.43716	21.6631
Olig1-Olig2_BIN_163	Olig1-Olig2_BIN_037	90762612	90766612	90764612	4.35659	20.4863	3.72757	13.2468	4.37034	20.6826
Olig1-Olig2_BIN_163	Olig1-Olig2_BIN_038	90766612	90770612	90768612	4.69963	25.9854	3.43425	10.8097	4.55752	23.5479
Olig1-Olig2_BIN_163	Olig1-Olig2_BIN_039	90770612	90774612	90772612	4.69963	25.9854	3.43425	10.8097	4.55752	23.5479
Olig1-Olig2_BIN_163	Olig1-Olig2_BIN_040	90774612	90778612	90776612	4.66219	25.3197	3.7344	13.3096	4.58575	24.0132
Olig1-Olig2_BIN_163	Olig1-Olig2_BIN_041	90778612	90782612	90780612	4.69013	25.8148	3.60123	12.1361	4.54909	23.4106
Olig1-Olig2_BIN_163	Olig1-Olig2_BIN_042	90782612	90786612	90784612	4.39739	21.0739	3.59232	12.0614	4.59647	24.1922
Olig1-Olig2_BIN_163	Olig1-Olig2_BIN_043	90786612	90790612	90788612	4.36252	20.5707	3.64818	12.5375	4.45893	21.9923
Olig1-Olig2_BIN_163	Olig1-Olig2_BIN_044	90790612	90794612	90792612	4.15079	17.7628	3.60955	12.2063	4.13109	17.5219
Olig1-Olig2_BIN_163	Olig1-Olig2_BIN_045	90794612	90798612	90796612	3.85708	14.491	3.42003	10.7036	4.06813	16.7737
Olig1-Olig2_BIN_163	Olig1-Olig2_BIN_046	90798612	90802612	90800612	3.98599	15.8453	3.81207	14.0459	4.19938	18.3712
Olig1-Olig2_BIN_163	Olig1-Olig2_BIN_047	90802612	90806612	90804612	4.32609	20.0578	3.99628	15.9588	4.13682	17.5917
Olig1-Olig2_BIN_163	Olig1-Olig2_BIN_048	90806612	90810612	90808612	4.38617	20.9107	3.85629	14.4831	4.31007	19.8363
Olig1-Olig2_BIN_163	Olig1-Olig2_BIN_049	90810612	90814612	90812612	4.26388	19.2113	4.05293	16.5979	4.50634	22.7271
Olig1-Olig2_BIN_163	Olig1-Olig2_BIN_050	90814612	90818612	90816612	4.48259	22.3559	4.19561	18.3234	4.69275	25.8617
Olig1-Olig2_BIN_163	Olig1-Olig2_BIN_051	90818612	90822612	90820612	4.54846	23.4005	4.30871	19.8176	4.65516	25.1967
Olig1-Olig2_BIN_163	Olig1-Olig2_BIN_052	90822612	90826612	90824612	4.68753	25.7683	4.14896	17.7404	4.79057	27.6761
Olig1-Olig2_BIN_163	Olig1-Olig2_BIN_053	90826612	90830612	90828612	4.92088	30.2924	4.33883	20.2358	4.86237	29.0883
Olig1-Olig2_BIN_163	Olig1-Olig2_BIN_054	90830612	90834612	90832612	4.92088	30.2924	4.33883	20.2358	4.86237	29.0883
Olig1-Olig2_BIN_163	Olig1-Olig2_BIN_055	90834612	90838612	90836612	4.7585	27.0676	4.4409	21.7193	5.32554	40.1004
Olig1-Olig2_BIN_163	Olig1-Olig2_BIN_056	90838612	90842612	90840612	4.7585	27.0676	4.4409	21.7193	5.32554	40.1004
Olig1-Olig2_BIN_163	Olig1-Olig2_BIN_057	90842612	90846612	90844612	4.25707	19.1208	4.74992	26.9073	5.35693	40.9823
Olig1-Olig2_BIN_163	Olig1-Olig2_BIN_058	90846612	90850612	90848612	4.67122	25.4787	4.63676	24.8774	5.44852	43.6685
Olig1-Olig2_BIN_163	Olig1-Olig2_BIN_059	90850612	90854612	90852612	5.17598	36.1513	4.46203	22.0396	5.35188	40.839
Olig1-Olig2_BIN_163	Olig1-Olig2_BIN_060	90854612	90858612	90856612	5.17598	36.1513	4.46203	22.0396	5.35188	40.839
Olig1-Olig2_BIN_163	Olig1-Olig2_BIN_061	90858612	90862612	90860612	5.0467	33.0528	4.52079	22.9559	5.18611	36.4061
Olig1-Olig2_BIN_163	Olig1-Olig2_BIN_062	90862612	90866612	90864612	5.17794	36.2006	4.42892	21.5396	5.12275	34.8419
Olig1-Olig2_BIN_163	Olig1-Olig2_BIN_063	90866612	90870612	90868612	5.29999	39.3964	4.45191	21.8856	5.00062	32.0137
Olig1-Olig2_BIN_163	Olig1-Olig2_BIN_064	90870612	90874612	90872612	5.29999	39.3964	4.45191	21.8856	5.00062	32.0137
Olig1-Olig2_BIN_163	Olig1-Olig2_BIN_065	90874612	90878612	90876612	5.18451	36.3658	4.35269	20.431	4.88849	29.6197
Olig1-Olig2_BIN_163	Olig1-Olig2_BIN_066	90878612	90882612	90880612	4.97014	31.3446	4.19167	18.2734	4.92971	30.4784
Olig1-Olig2_BIN_163	Olig1-Olig2_BIN_067	90882612	90886612	90884612	4.97014	31.3446	4.19167	18.2734	4.92971	30.4784
Olig1-Olig2_BIN_163	Olig1-Olig2_BIN_068	90886612	90890612	90888612	4.97014	31.3446	4.19167	18.2734	4.92971	30.4784
Olig1-Olig2_BIN_163	Olig1-Olig2_BIN_069	90890612	90894612	90892612	4.69016	25.8154	4.07826	16.8919	4.56351	23.6458
Olig1-Olig2_BIN_163	Olig1-Olig2_BIN_070	90894612	90898612	90896612	4.45465	21.9272	4.57144	23.7761	4.74183	26.7566
Olig1-Olig2_BIN_163	Olig1-Olig2_BIN_071	90898612	90902612	90900612	4.68519	25.7267	4.12693	17.4714	5.04051	32.9113
Olig1-Olig2_BIN_163	Olig1-Olig2_BIN_072	90902612	90906612	90904612	4.82728	28.3894	4.18042	18.1314	4.87809	29.4071
Olig1-Olig2_BIN_163	Olig1-Olig2_BIN_073	90906612	90910612	90908612	5.0353	32.7925	4.13684	17.5919	4.78103	27.4936
Olig1-Olig2_BIN_163	Olig1-Olig2_BIN_074	90910612	90914612	90912612	5.0167	32.3727	4.33304	20.1547	4.59561	24.1777
Olig1-Olig2_BIN_163	Olig1-Olig2_BIN_075	90914612	90918612	90916612	5.10879	34.5064	4.3903	20.9706	4.47202	22.1928
Olig1-Olig2_BIN_163	Olig1-Olig2_BIN_076	90918612	90922612	90920612	5.1255	34.9083	4.3687	20.659	4.4872	22.4276
Olig1-Olig2_BIN_163	Olig1-Olig2_BIN_077	90922612	90926612	90924612	5.11206	34.5847	4.33098	20.1258	4.41797	21.3767
Olig1-Olig2_BIN_163	Olig1-Olig2_BIN_078	90926612	90930612	90928612	5.37146	41.3973	4.33189	20.1386	4.77138	27.3104
Olig1-Olig2_BIN_163	Olig1-Olig2_BIN_079	90930612	90934612	90932612	5.3901	41.9354	4.29017	19.5646	4.8378	28.5971
Olig1-Olig2_BIN_163	Olig1-Olig2_BIN_080	90934612	90938612	90936612	5.39641	42.1194	4.4253	21.4856	4.78475	27.5647
Olig1-Olig2_BIN_163	Olig1-Olig2_BIN_081	90938612	90942612	90940612	5.39973	42.2162	4.45332	21.907	4.72743	26.491
Olig1-Olig2_BIN_163	Olig1-Olig2_BIN_082	90942612	90946612	90944612	5.17202	36.0522	4.51047	22.7923	4.61066	24.4313
Olig1-Olig2_BIN_163	Olig1-Olig2_BIN_083	90946612	90950612	90948612	5.01337	32.2979	4.43265	21.5953	4.56774	23.7151
Olig1-Olig2_BIN_163	Olig1-Olig2_BIN_084	90950612	90954612	90952612	4.99959	31.9909	4.3892	20.9547	4.62925	24.7482
Olig1-Olig2_BIN_163	Olig1-Olig2_BIN_085	90954612	90958612	90956612	5.16974	35.9954	4.08451	16.9652	4.38289	20.8633
Olig1-Olig2_BIN_163	Olig1-Olig2_BIN_086	90958612	90962612	90960612	5.32653	40.1279	4.07699	16.877	4.61367	24.4823
Olig1-Olig2_BIN_163	Olig1-Olig2_BIN_087	90962612	90966612	90964612	5.34213	40.5639	4.09537	17.0934	4.54817	23.3956
Olig1-Olig2_BIN_163	Olig1-Olig2_BIN_088	90966612	90970612	90968612	5.5104	45.5821	4.04471	16.5036	4.57233	23.7907
Olig1-Olig2_BIN_163	Olig1-Olig2_BIN_089	90970612	90974612	90972612	5.45141	43.7561	3.73046	13.2733	4.65867	25.2581
Olig1-Olig2_BIN_163	Olig1-Olig2_BIN_090	90974612	90978612	90976612	5.43938	43.3926	3.96451	15.6112	4.83272	28.4966
Olig1-Olig2_BIN_163	Olig1-Olig2_BIN_091	90978612	90982612	90980612	5.26013	38.3227	4.01679	16.1873	4.8665	29.1718
Olig1-Olig2_BIN_163	Olig1-Olig2_BIN_092	90982612	90986612	90984612	5.29943	39.3811	4.14168	17.651	4.91405	30.1492
Olig1-Olig2_BIN_163	Olig1-Olig2_BIN_093	90986612	90990612	90988612	5.3136	39.7697	4.52442	23.0137	4.84473	28.7349
Olig1-Olig2_BIN_163	Olig1-Olig2_BIN_094	90990612	90994612	90992612	5.3136	39.7697	4.52442	23.0137	4.84473	28.7349
Olig1-Olig2_BIN_163	Olig1-Olig2_BIN_095	90994612	90998612	90996612	5.20414	36.864	4.57908	23.9024	4.85544	28.9489
Olig1-Olig2_BIN_163	Olig1-Olig2_BIN_096	90998612	91002612	91000612	5.3694	41.338	4.66737	25.4109	4.81889	28.2247
Olig1-Olig2_BIN_163	Olig1-Olig2_BIN_097	91002612	91006612	91004612	5.46225	44.086	4.83392	28.5204	4.76369	27.1653
Olig1-Olig2_BIN_163	Olig1-Olig2_BIN_098	91006612	91010612	91008612	5.74835	53.7558	4.64034	24.9391	4.41535	21.338
Olig1-Olig2_BIN_163	Olig1-Olig2_BIN_099	91010612	91014612	91012612	6.07675	67.497	4.44904	21.8421	4.47448	22.2306
Olig1-Olig2_BIN_163	Olig1-Olig2_BIN_100	91014612	91018612	91016612	6.07675	67.497	4.44904	21.8421	4.47448	22.2306
Olig1-Olig2_BIN_163	Olig1-Olig2_BIN_101	91018612	91022612	91020612	5.89262	59.4094	4.50278	22.671	4.49947	22.6191
Olig1-Olig2_BIN_163	Olig1-Olig2_BIN_102	91022612	91026612	91024612	6.08633	67.9468	4.84046	28.65	4.62567	24.6869
Olig1-Olig2_BIN_163	Olig1-Olig2_BIN_103	91026612	91030612	91028612	6.16323	71.6667	4.87879	29.4213	5.12514	34.8996
Olig1-Olig2_BIN_163	Olig1-Olig2_BIN_104	91030612	91034612	91032612	6.44026	86.8384	4.65253	25.1508	5.18607	36.405
Olig1-Olig2_BIN_163	Olig1-Olig2_BIN_105	91034612	91038612	91036612	6.43601	86.583	4.8427	28.6944	5.15354	35.5935
Olig1-Olig2_BIN_163	Olig1-Olig2_BIN_106	91038612	91042612	91040612	6.81493	112.589	4.38824	20.9407	5.44955	43.6996
Olig1-Olig2_BIN_163	Olig1-Olig2_BIN_107	91042612	91046612	91044612	6.67883	102.454	4.55372	23.4859	5.35989	41.0664
Olig1-Olig2_BIN_163	Olig1-Olig2_BIN_108	91046612	91050612	91048612	6.62582	98.7574	4.50919	22.772	5.35012	40.7892
Olig1-Olig2_BIN_163	Olig1-Olig2_BIN_109	91050612	91054612	91052612	6.37102	82.769	4.55475	23.5026	5.33177	40.2739
Olig1-Olig2_BIN_163	Olig1-Olig2_BIN_110	91054612	91058612	91056612	6.16465	71.7374	4.71445	26.2538	5.23846	37.7515
Olig1-Olig2_BIN_163	Olig1-Olig2_BIN_111	91058612	91062612	91060612	6.13673	70.3624	4.84518	28.7439	5.19124	36.5358
Olig1-Olig2_BIN_163	Olig1-Olig2_BIN_112	91062612	91066612	91064612	6.11748	69.4297	4.78299	27.5311	5.26333	38.4079
Olig1-Olig2_BIN_163	Olig1-Olig2_BIN_113	91066612	91070612	91068612	6.1188	69.4932	4.93009	30.4864	5.12214	34.8271
Olig1-Olig2_BIN_163	Olig1-Olig2_BIN_114	91070612	91074612	91072612	6.48027	89.2802	5.00476	32.1058	5.20616	36.9157
Olig1-Olig2_BIN_163	Olig1-Olig2_BIN_115	91074612	91078612	91076612	7.00042	128.037	5.35647	40.9691	5.71369	52.4798
Olig1-Olig2_BIN_163	Olig1-Olig2_BIN_116	91078612	91082612	91080612	7.00042	128.037	5.35647	40.9691	5.71369	52.4798
Olig1-Olig2_BIN_163	Olig1-Olig2_BIN_117	91082612	91086612	91084612	6.83178	113.912	5.43952	43.3968	5.70543	52.1801
Olig1-Olig2_BIN_163	Olig1-Olig2_BIN_118	91086612	91090612	91088612	6.89847	119.302	5.419	42.784	5.87113	58.5309
Olig1-Olig2_BIN_163	Olig1-Olig2_BIN_119	91090612	91094612	91092612	6.73746	106.703	5.597	48.4022	5.93241	61.071
Olig1-Olig2_BIN_163	Olig1-Olig2_BIN_120	91094612	91098612	91096612	6.82481	113.363	5.42497	42.9613	5.96175	62.3255
Olig1-Olig2_BIN_163	Olig1-Olig2_BIN_121	91098612	91102612	91100612	6.60689	97.4701	5.78161	55.0095	5.79206	55.4095
Olig1-Olig2_BIN_163	Olig1-Olig2_BIN_122	91102612	91106612	91104612	6.50636	90.9098	5.45819	43.9622	5.80409	55.8735
Olig1-Olig2_BIN_163	Olig1-Olig2_BIN_123	91106612	91110612	91108612	6.34622	81.3585	5.37861	41.6028	5.89476	59.4976
Olig1-Olig2_BIN_163	Olig1-Olig2_BIN_124	91110612	91114612	91112612	6.54196	93.1806	5.38402	41.7592	6.00821	64.3652
Olig1-Olig2_BIN_163	Olig1-Olig2_BIN_125	91114612	91118612	91116612	6.61324	97.9004	5.51637	45.7714	6.00923	64.4109
Olig1-Olig2_BIN_163	Olig1-Olig2_BIN_126	91118612	91122612	91120612	6.46654	88.4346	5.60228	48.5797	6.05193	66.3455
Olig1-Olig2_BIN_163	Olig1-Olig2_BIN_127	91122612	91126612	91124612	6.70396	104.254	5.56852	47.4562	6.32908	80.3976
Olig1-Olig2_BIN_163	Olig1-Olig2_BIN_128	91126612	91130612	91128612	6.96319	124.775	5.49797	45.1912	6.36188	82.2466
Olig1-Olig2_BIN_163	Olig1-Olig2_BIN_129	91130612	91134612	91132612	6.963	124.759	5.17115	36.0305	6.34329	81.1934
Olig1-Olig2_BIN_163	Olig1-Olig2_BIN_130	91134612	91138612	91136612	7.31862	159.633	5.08715	33.9927	6.32089	79.9423
Olig1-Olig2_BIN_163	Olig1-Olig2_BIN_131	91138612	91142612	91140612	7.31862	159.633	5.08715	33.9927	6.32089	79.9423
Olig1-Olig2_BIN_163	Olig1-Olig2_BIN_132	91142612	91146612	91144612	7.31862	159.633	5.08715	33.9927	6.32089	79.9423
Olig1-Olig2_BIN_163	Olig1-Olig2_BIN_133	91146612	91150612	91148612	7.27792	155.194	5.1823	36.3102	6.25273	76.2534
Olig1-Olig2_BIN_163	Olig1-Olig2_BIN_134	91150612	91154612	91152612	7.51944	183.475	5.42666	43.0118	6.25059	76.1401
Olig1-Olig2_BIN_163	Olig1-Olig2_BIN_135	91154612	91158612	91156612	7.79977	222.826	5.74392	53.5909	6.46712	88.47
Olig1-Olig2_BIN_163	Olig1-Olig2_BIN_136	91158612	91162612	91160612	7.76049	216.841	5.99157	63.627	6.18117	72.5634
Olig1-Olig2_BIN_163	Olig1-Olig2_BIN_137	91162612	91166612	91164612	7.78055	219.877	5.82375	56.6402	6.2902	78.2598
Olig1-Olig2_BIN_163	Olig1-Olig2_BIN_138	91166612	91170612	91168612	7.87858	235.336	5.96494	62.4632	6.25557	76.4038
Olig1-Olig2_BIN_163	Olig1-Olig2_BIN_139	91170612	91174612	91172612	7.65209	201.144	5.85348	57.8191	6.19845	73.4379
Olig1-Olig2_BIN_163	Olig1-Olig2_BIN_140	91174612	91178612	91176612	7.45498	175.458	5.90122	59.7646	5.893	59.4249
Olig1-Olig2_BIN_163	Olig1-Olig2_BIN_141	91178612	91182612	91180612	7.48652	179.336	5.87754	58.7918	6.00408	64.1813
Olig1-Olig2_BIN_163	Olig1-Olig2_BIN_142	91182612	91186612	91184612	7.84979	230.687	5.85161	57.7446	5.99499	63.7781
Olig1-Olig2_BIN_163	Olig1-Olig2_BIN_143	91186612	91190612	91188612	7.96743	250.285	5.93879	61.3415	5.94601	61.6493
Olig1-Olig2_BIN_163	Olig1-Olig2_BIN_144	91190612	91194612	91192612	8.47406	355.587	5.97346	62.8335	5.8991	59.677
Olig1-Olig2_BIN_163	Olig1-Olig2_BIN_145	91194612	91198612	91196612	8.15686	285.403	6.27046	77.196	6.08751	68.0021
Olig1-Olig2_BIN_163	Olig1-Olig2_BIN_146	91198612	91202612	91200612	7.89512	238.05	6.53321	92.6175	6.10106	68.6441
Olig1-Olig2_BIN_163	Olig1-Olig2_BIN_147	91202612	91206612	91204612	7.85338	231.261	7.00527	128.468	6.69563	103.654
Olig1-Olig2_BIN_163	Olig1-Olig2_BIN_148	91206612	91210612	91208612	7.85338	231.261	7.00527	128.468	6.69563	103.654
Olig1-Olig2_BIN_163	Olig1-Olig2_BIN_149	91210612	91214612	91212612	8.45367	350.597	7.03499	131.142	7.01374	129.225
Olig1-Olig2_BIN_163	Olig1-Olig2_BIN_150	91214612	91218612	91216612	9.09915	548.426	6.92741	121.719	7.40807	169.844
Olig1-Olig2_BIN_163	Olig1-Olig2_BIN_151	91218612	91222612	91220612	9.82718	908.401	7.17701	144.709	7.75828	216.508
Olig1-Olig2_BIN_163	Olig1-Olig2_BIN_152	91222612	91226612	91224612	9.9093	961.605	7.04558	132.109	7.70666	208.899
Olig1-Olig2_BIN_163	Olig1-Olig2_BIN_153	91226612	91230612	91228612	9.84751	921.29	6.99333	127.41	7.68808	206.226
Olig1-Olig2_BIN_163	Olig1-Olig2_BIN_154	91230612	91234612	91232612	9.63581	795.55	6.83729	114.348	7.37294	165.759
Olig1-Olig2_BIN_163	Olig1-Olig2_BIN_155	91234612	91238612	91236612	9.46434	706.4	6.88303	118.032	7.35714	163.953
Olig1-Olig2_BIN_163	Olig1-Olig2_BIN_156	91238612	91242612	91240612	9.05931	533.487	6.74635	107.363	7.24696	151.898
Olig1-Olig2_BIN_163	Olig1-Olig2_BIN_157	91242612	91246612	91244612	8.69935	415.685	6.66182	101.253	7.1082	137.969
Olig1-Olig2_BIN_163	Olig1-Olig2_BIN_158	91246612	91250612	91248612	8.49417	360.579	6.76428	108.705	7.55047	187.464
Olig1-Olig2_BIN_163	Olig1-Olig2_BIN_159	91250612	91254612	91252612	9.69351	828.011	8.22692	299.605	9.17173	576.719
Olig1-Olig2_BIN_163	Olig1-Olig2_BIN_160	91254612	91258612	91256612	10.2737	1237.88	8.48849	359.162	9.78911	884.742
Olig1-Olig2_BIN_163	Olig1-Olig2_BIN_161	91258612	91262612	91260612	10.3803	1332.84	8.42642	344.037	9.93006	975.543
Olig1-Olig2_BIN_163	Olig1-Olig2_BIN_162	91262612	91266612	91264612	10.3803	1332.84	8.42642	344.037	9.93006	975.543
Olig1-Olig2_BIN_163	Olig1-Olig2_BIN_163	91266612	91270612	91268612	10.554	1503.34	8.18928	291.89	9.8925	950.475
Olig1-Olig2_BIN_163	Olig1-Olig2_BIN_164	91270612	91274612	91272612	10.5911	1542.58	8.22207	298.599	10.0485	1058.99
Olig1-Olig2_BIN_163	Olig1-Olig2_BIN_165	91274612	91278612	91276612	9.65475	806.065	7.901	239.023	8.88422	472.517
Olig1-Olig2_BIN_163	Olig1-Olig2_BIN_166	91278612	91282612	91280612	9.56664	758.307	7.7944	221.997	8.86071	464.878
Olig1-Olig2_BIN_163	Olig1-Olig2_BIN_167	91282612	91286612	91284612	9.36687	660.251	7.69044	206.563	8.3538	327.147
Olig1-Olig2_BIN_163	Olig1-Olig2_BIN_168	91286612	91290612	91288612	9.36687	660.251	7.69044	206.563	8.3538	327.147
Olig1-Olig2_BIN_163	Olig1-Olig2_BIN_169	91290612	91294612	91292612	9.3274	642.431	7.50707	181.908	7.56467	189.318
Olig1-Olig2_BIN_163	Olig1-Olig2_BIN_170	91294612	91298612	91296612	9.62048	787.143	7.45332	175.256	7.61863	196.533
Olig1-Olig2_BIN_163	Olig1-Olig2_BIN_171	91298612	91302612	91300612	10.2301	1201.1	7.21848	148.929	7.27549	154.932
Olig1-Olig2_BIN_163	Olig1-Olig2_BIN_172	91302612	91306612	91304612	10.0708	1075.5	6.95617	124.17	7.27905	155.314
Olig1-Olig2_BIN_163	Olig1-Olig2_BIN_173	91306612	91310612	91308612	9.41788	684.011	6.86298	116.403	6.7792	109.836
Olig1-Olig2_BIN_163	Olig1-Olig2_BIN_174	91310612	91314612	91312612	9.41788	684.011	6.86298	116.403	6.7792	109.836
Olig1-Olig2_BIN_163	Olig1-Olig2_BIN_175	91314612	91318612	91316612	8.35895	328.318	6.56487	94.6724	6.80356	111.705
Olig1-Olig2_BIN_163	Olig1-Olig2_BIN_176	91318612	91322612	91320612	8.35895	328.318	6.56487	94.6724	6.80356	111.705
Olig1-Olig2_BIN_163	Olig1-Olig2_BIN_177	91322612	91326612	91324612	7.67852	204.863	6.55366	93.9393	6.78507	110.283
Olig1-Olig2_BIN_163	Olig1-Olig2_BIN_178	91326612	91330612	91328612	7.42861	172.279	6.53352	92.6374	6.80706	111.977
Olig1-Olig2_BIN_163	Olig1-Olig2_BIN_179	91330612	91334612	91332612	7.42861	172.279	6.53352	92.6374	6.80706	111.977
Olig1-Olig2_BIN_163	Olig1-Olig2_BIN_180	91334612	91338612	91336612	7.42861	172.279	6.53352	92.6374	6.80706	111.977
Olig1-Olig2_BIN_163	Olig1-Olig2_BIN_181	91338612	91342612	91340612	7.60162	194.23	6.27034	77.1898	6.89895	119.341
Olig1-Olig2_BIN_163	Olig1-Olig2_BIN_182	91342612	91346612	91344612	7.9931	254.778	6.39184	83.972	6.67487	102.173
Olig1-Olig2_BIN_163	Olig1-Olig2_BIN_183	91346612	91350612	91348612	7.96674	250.165	6.16812	71.9099	6.62326	98.5826
Olig1-Olig2_BIN_163	Olig1-Olig2_BIN_184	91350612	91354612	91352612	7.8162	225.377	6.06096	66.762	6.53711	92.8682
Olig1-Olig2_BIN_163	Olig1-Olig2_BIN_185	91354612	91358612	91356612	7.93513	244.745	5.97976	63.1084	6.48886	89.8137
Olig1-Olig2_BIN_163	Olig1-Olig2_BIN_186	91358612	91362612	91360612	7.81899	225.814	5.6065	48.7219	6.43031	86.2415
Olig1-Olig2_BIN_163	Olig1-Olig2_BIN_187	91362612	91366612	91364612	7.46163	176.268	5.17203	36.0525	6.40723	84.8725
Olig1-Olig2_BIN_163	Olig1-Olig2_BIN_188	91366612	91370612	91368612	7.00354	128.315	5.43748	43.3355	6.34245	81.1464
Olig1-Olig2_BIN_163	Olig1-Olig2_BIN_189	91370612	91374612	91372612	6.96907	125.285	5.36428	41.1916	6.24499	75.8453
Olig1-Olig2_BIN_163	Olig1-Olig2_BIN_190	91374612	91378612	91376612	6.75205	107.787	5.40479	42.3648	6.05665	66.5632
Olig1-Olig2_BIN_163	Olig1-Olig2_BIN_191	91378612	91382612	91380612	6.32936	80.4133	5.32723	40.1473	5.65688	50.4534
Olig1-Olig2_BIN_163	Olig1-Olig2_BIN_192	91382612	91386612	91384612	6.18979	72.9984	5.34991	40.7835	5.52478	46.0387
Olig1-Olig2_BIN_163	Olig1-Olig2_BIN_193	91386612	91390612	91388612	6.14165	70.6028	5.31028	39.6783	5.41358	42.6236
Olig1-Olig2_BIN_163	Olig1-Olig2_BIN_194	91390612	91394612	91392612	6.03614	65.6235	5.27148	38.6255	5.3023	39.4596
Olig1-Olig2_BIN_163	Olig1-Olig2_BIN_195	91394612	91398612	91396612	5.98847	63.4904	5.09041	34.0695	5.46379	44.1331
Olig1-Olig2_BIN_163	Olig1-Olig2_BIN_196	91398612	91402612	91400612	6.22386	74.7425	4.88404	29.5286	5.53928	46.5038
Olig1-Olig2_BIN_163	Olig1-Olig2_BIN_197	91402612	91406612	91404612	6.43124	86.2974	5.10596	34.4387	5.6092	48.8132
Olig1-Olig2_BIN_163	Olig1-Olig2_BIN_198	91406612	91410612	91408612	6.06724	67.0533	5.27207	38.6412	5.28712	39.0465
Olig1-Olig2_BIN_163	Olig1-Olig2_BIN_199	91410612	91414612	91412612	5.97749	63.0094	5.3294	40.2076	5.24788	37.9988
Olig1-Olig2_BIN_163	Olig1-Olig2_BIN_200	91414612	91418612	91416612	6.01111	64.4948	5.30806	39.6173	5.29869	39.3609
Olig1-Olig2_BIN_163	Olig1-Olig2_BIN_201	91418612	91422612	91420612	5.77067	54.5941	5.32105	39.9756	5.21297	37.0902
Olig1-Olig2_BIN_163	Olig1-Olig2_BIN_202	91422612	91426612	91424612	5.54925	46.8265	5.23272	37.6016	5.17201	36.052
Olig1-Olig2_BIN_163	Olig1-Olig2_BIN_203	91426612	91430612	91428612	5.58071	47.8588	5.17066	36.0184	5.13824	35.218
Olig1-Olig2_BIN_163	Olig1-Olig2_BIN_204	91430612	91434612	91432612	5.83018	56.893	5.19848	36.7197	5.29178	39.1727
Olig1-Olig2_BIN_163	Olig1-Olig2_BIN_205	91434612	91438612	91436612	5.86952	58.4656	5.16293	35.8258	5.35767	41.0035
Olig1-Olig2_BIN_163	Olig1-Olig2_BIN_206	91438612	91442612	91440612	6.02533	65.1337	5.18519	36.3829	5.33984	40.4997
Olig1-Olig2_BIN_163	Olig1-Olig2_BIN_207	91442612	91446612	91444612	6.27302	77.3336	5.20489	36.8831	5.66233	50.6442
Olig1-Olig2_BIN_163	Olig1-Olig2_BIN_208	91446612	91450612	91448612	6.40863	84.955	5.31667	39.8544	5.61821	49.1189
Olig1-Olig2_BIN_163	Olig1-Olig2_BIN_209	91450612	91454612	91452612	6.28564	78.0129	4.72585	26.462	5.67541	51.1057
Olig1-Olig2_BIN_163	Olig1-Olig2_BIN_210	91454612	91458612	91456612	6.43007	86.2272	4.60539	24.3423	5.74523	53.6398
Olig1-Olig2_BIN_163	Olig1-Olig2_BIN_211	91458612	91462612	91460612	6.43007	86.2272	4.60539	24.3423	5.74523	53.6398
Olig1-Olig2_BIN_163	Olig1-Olig2_BIN_212	91462612	91466612	91464612	6.48017	89.2744	4.58947	24.0751	5.59249	48.2511
Olig1-Olig2_BIN_163	Olig1-Olig2_BIN_213	91466612	91470612	91468612	6.46581	88.3902	4.57925	23.9051	5.38662	41.8343
Olig1-Olig2_BIN_163	Olig1-Olig2_BIN_214	91470612	91474612	91472612	6.33332	80.6343	4.6975	25.947	5.04945	33.1157
Olig1-Olig2_BIN_163	Olig1-Olig2_BIN_215	91474612	91478612	91476612	6.47961	89.2394	4.66554	25.3786	5.07534	33.7154
Olig1-Olig2_BIN_163	Olig1-Olig2_BIN_216	91478612	91482612	91480612	6.28579	78.021	4.71915	26.3394	4.9387	30.6688
Olig1-Olig2_BIN_163	Olig1-Olig2_BIN_217	91482612	91486612	91484612	6.3557	81.8946	4.5742	23.8216	5.09676	34.2197
Olig1-Olig2_BIN_163	Olig1-Olig2_BIN_218	91486612	91490612	91488612	6.32137	79.9689	4.5505	23.4335	5.43921	43.3875
Olig1-Olig2_BIN_163	Olig1-Olig2_BIN_219	91490612	91494612	91492612	6.4759	89.0105	4.34882	20.3763	5.39166	41.9809
Olig1-Olig2_BIN_163	Olig1-Olig2_BIN_220	91494612	91498612	91496612	6.09408	68.3124	4.30523	19.7699	5.45088	43.7398
Olig1-Olig2_BIN_163	Olig1-Olig2_BIN_221	91498612	91502612	91500612	6.81008	112.212	3.63202	12.3978	6.12412	69.7499
Olig1-Olig2_BIN_163	Olig1-Olig2_BIN_222	91502612	91506612	91504612	5.68359	51.3963	4.83921	28.6251	5.44589	43.5889
Olig1-Olig2_BIN_163	Olig1-Olig2_BIN_223	91506612	91510612	91508612	6.01854	64.8279	4.58824	24.0545	5.65284	50.3125
Olig1-Olig2_BIN_163	Olig1-Olig2_BIN_224	91510612	91514612	91512612	6.01854	64.8279	4.58824	24.0545	5.65284	50.3125
Olig1-Olig2_BIN_163	Olig1-Olig2_BIN_225	91514612	91518612	91516612	5.66835	50.8562	4.6316	24.7886	4.91868	30.2461
Olig1-Olig2_BIN_163	Olig1-Olig2_BIN_226	91518612	91522612	91520612	5.64761	50.1303	4.54239	23.3022	5.14323	35.3401
Olig1-Olig2_BIN_163	Olig1-Olig2_BIN_227	91522612	91526612	91524612	5.59549	48.3516	4.63661	24.8748	4.87539	29.352
Olig1-Olig2_BIN_163	Olig1-Olig2_BIN_228	91526612	91530612	91528612	5.56015	47.1816	4.62908	24.7453	4.82478	28.3402
Olig1-Olig2_BIN_163	Olig1-Olig2_BIN_229	91530612	91534612	91532612	5.54456	46.6745	4.55705	23.5401	4.84191	28.6788
Olig1-Olig2_BIN_163	Olig1-Olig2_BIN_230	91534612	91538612	91536612	5.43408	43.2337	4.66042	25.2886	4.9871	31.7151
Olig1-Olig2_BIN_163	Olig1-Olig2_BIN_231	91538612	91542612	91540612	5.73526	53.2705	4.4377	21.671	4.87666	29.378
Olig1-Olig2_BIN_163	Olig1-Olig2_BIN_232	91542612	91546612	91544612	5.78226	55.0343	4.38932	20.9563	4.99649	31.9222
Olig1-Olig2_BIN_163	Olig1-Olig2_BIN_233	91546612	91550612	91548612	5.93214	61.0593	4.39391	21.0232	4.8401	28.6427
Olig1-Olig2_BIN_163	Olig1-Olig2_BIN_234	91550612	91554612	91552612	5.9514	61.8798	4.62112	24.6092	4.97153	31.3747
Olig1-Olig2_BIN_163	Olig1-Olig2_BIN_235	91554612	91558612	91556612	5.94699	61.691	4.70464	26.0758	4.99336	31.8531
Olig1-Olig2_BIN_163	Olig1-Olig2_BIN_236	91558612	91562612	91560612	5.75749	54.0974	4.76533	27.1961	4.99112	31.8036
Olig1-Olig2_BIN_163	Olig1-Olig2_BIN_237	91562612	91566612	91564612	5.57239	47.5834	4.70253	26.0377	5.09492	34.1761
Olig1-Olig2_BIN_163	Olig1-Olig2_BIN_238	91566612	91570612	91568612	5.54344	46.6382	5.06497	33.4741	5.44978	43.7065
Olig1-Olig2_BIN_163	Olig1-Olig2_BIN_239	91570612	91574612	91572612	5.49054	44.9591	5.02375	32.5312	5.26268	38.3907
Olig1-Olig2_BIN_163	Olig1-Olig2_BIN_240	91574612	91578612	91576612	5.31919	39.9242	4.50154	22.6516	5.02639	32.5908
Olig1-Olig2_BIN_163	Olig1-Olig2_BIN_241	91578612	91582612	91580612	5.31919	39.9242	4.50154	22.6516	5.02639	32.5908
Olig1-Olig2_BIN_163	Olig1-Olig2_BIN_242	91582612	91586612	91584612	5.5153	45.7374	4.62735	24.7156	5.06771	33.5377
Olig1-Olig2_BIN_163	Olig1-Olig2_BIN_243	91586612	91590612	91588612	5.80642	55.9636	4.6285	24.7353	5.06277	33.423
Olig1-Olig2_BIN_163	Olig1-Olig2_BIN_244	91590612	91594612	91592612	5.99469	63.7649	4.50033	22.6326	5.16418	35.857
Olig1-Olig2_BIN_163	Olig1-Olig2_BIN_245	91594612	91598612	91596612	5.99469	63.7649	4.50033	22.6326	5.16418	35.857
Olig1-Olig2_BIN_163	Olig1-Olig2_BIN_246	91598612	91602612	91600612	6.05218	66.3571	4.68648	25.7496	4.99478	31.8845
Olig1-Olig2_BIN_163	Olig1-Olig2_BIN_247	91602612	91606612	91604612	5.98676	63.4154	4.37835	20.7977	4.90389	29.9376
Olig1-Olig2_BIN_163	Olig1-Olig2_BIN_248	91606612	91610612	91608612	5.91147	60.1906	4.04742	16.5346	4.93863	30.6673
Olig1-Olig2_BIN_163	Olig1-Olig2_BIN_249	91610612	91614612	91612612	5.26817	38.5368	4.30609	19.7816	4.57282	23.7988
Olig1-Olig2_BIN_163	Olig1-Olig2_BIN_250	91614612	91618612	91616612	5.20911	36.9912	4.32588	20.0549	4.46739	22.1217
Olig1-Olig2_BIN_163	Olig1-Olig2_BIN_251	91618612	91622612	91620612	5.00201	32.0447	4.27972	19.4234	4.27247	19.326
Olig1-Olig2_BIN_163	Olig1-Olig2_BIN_252	91622612	91626612	91624612	5.07557	33.7208	4.27056	19.3004	4.21547	18.5773
Olig1-Olig2_BIN_163	Olig1-Olig2_BIN_253	91626612	91630612	91628612	5.19161	36.5453	4.3505	20.4	4.0575	16.6505
Olig1-Olig2_BIN_163	Olig1-Olig2_BIN_254	91630612	91634612	91632612	5.03766	32.8463	4.11904	17.3762	4.17543	18.0688
Olig1-Olig2_BIN_163	Olig1-Olig2_BIN_255	91634612	91638612	91636612	5.42471	42.9535	4.00029	16.0032	4.4147	21.3283
Olig1-Olig2_BIN_163	Olig1-Olig2_BIN_256	91638612	91642612	91640612	5.44506	43.5638	4.08807	17.0072	4.36907	20.6643
Olig1-Olig2_BIN_163	Olig1-Olig2_BIN_257	91642612	91646612	91644612	5.50412	45.3842	4.11569	17.3359	4.64248	24.9762
Olig1-Olig2_BIN_163	Olig1-Olig2_BIN_258	91646612	91650612	91648612	5.85551	57.9007	4.06974	16.7925	4.69236	25.8549
Olig1-Olig2_BIN_163	Olig1-Olig2_BIN_259	91650612	91654612	91652612	6.45719	87.8633	3.99692	15.9659	5.22272	37.3418
Olig1-Olig2_BIN_163	Olig1-Olig2_BIN_260	91654612	91658612	91656612	6.38336	83.4803	3.7076	13.0647	4.90734	30.0093
Olig1-Olig2_BIN_163	Olig1-Olig2_BIN_261	91658612	91662612	91660612	5.93641	61.2404	3.9082	15.0136	4.9605	31.1357
Olig1-Olig2_BIN_163	Olig1-Olig2_BIN_262	91662612	91666612	91664612	5.93641	61.2404	3.9082	15.0136	4.9605	31.1357
Olig1-Olig2_BIN_163	Olig1-Olig2_BIN_263	91666612	91670612	91668612	5.93641	61.2404	3.9082	15.0136	4.9605	31.1357
Olig1-Olig2_BIN_163	Olig1-Olig2_BIN_264	91670612	91674612	91672612	6.1315	70.1076	3.752	13.473	5.11848	34.7388
Olig1-Olig2_BIN_163	Olig1-Olig2_BIN_265	91674612	91678612	91676612	6.1315	70.1076	3.752	13.473	5.11848	34.7388
Olig1-Olig2_BIN_163	Olig1-Olig2_BIN_266	91678612	91682612	91680612	5.96906	62.6422	3.77104	13.652	4.70959	26.1655
Olig1-Olig2_BIN_163	Olig1-Olig2_BIN_267	91682612	91686612	91684612	5.99297	63.6888	3.56156	11.8069	4.59895	24.2338
Olig1-Olig2_BIN_163	Olig1-Olig2_BIN_268	91686612	91690612	91688612	5.92872	60.9147	3.48344	11.1846	4.59618	24.1873
Olig1-Olig2_BIN_163	Olig1-Olig2_BIN_269	91690612	91694612	91692612	5.59325	48.2764	3.64492	12.5092	4.45462	21.9268
Olig1-Olig2_BIN_163	Olig1-Olig2_BIN_270	91694612	91698612	91696612	5.67091	50.9463	3.70793	13.0676	4.66024	25.2855
Olig1-Olig2_BIN_163	Olig1-Olig2_BIN_271	91698612	91702612	91700612	5.35284	40.8663	3.405	10.5927	4.56012	23.5902
Olig1-Olig2_BIN_163	Olig1-Olig2_BIN_272	91702612	91706612	91704612	5.00292	32.0648	3.40734	10.6099	4.7139	26.2438
Olig1-Olig2_BIN_163	Olig1-Olig2_BIN_273	91706612	91710612	91708612	4.81998	28.2461	3.69624	12.9622	4.59901	24.2347
Olig1-Olig2_BIN_163	Olig1-Olig2_BIN_274	91710612	91714612	91712612	4.85836	29.0076	3.81199	14.0451	4.94705	30.8468
Olig1-Olig2_BIN_163	Olig1-Olig2_BIN_275	91714612	91718612	91716612	4.85836	29.0076	3.81199	14.0451	4.94705	30.8468
Olig1-Olig2_BIN_163	Olig1-Olig2_BIN_276	91718612	91722612	91720612	5.21893	37.2439	3.62959	12.377	5.02567	32.5745
Olig1-Olig2_BIN_163	Olig1-Olig2_BIN_277	91722612	91726612	91724612	5.42758	43.0392	3.79545	13.885	5.05477	33.2382
Olig1-Olig2_BIN_163	Olig1-Olig2_BIN_278	91726612	91730612	91728612	5.42726	43.0298	3.70016	12.9975	4.65657	25.2213
Olig1-Olig2_BIN_163	Olig1-Olig2_BIN_279	91730612	91734612	91732612	5.24304	37.8715	3.61153	12.223	4.51049	22.7926
Olig1-Olig2_BIN_163	Olig1-Olig2_BIN_280	91734612	91738612	91736612	5.45205	43.7753	3.71945	13.1725	4.51696	22.895
Olig1-Olig2_BIN_163	Olig1-Olig2_BIN_281	91738612	91742612	91740612	4.95435	31.0034	4.04122	16.4637	4.28648	19.5145
Olig1-Olig2_BIN_163	Olig1-Olig2_BIN_282	91742612	91746612	91744612	4.90238	29.9064	4.21379	18.5557	4.4375	21.6681
Olig1-Olig2_BIN_163	Olig1-Olig2_BIN_283	91746612	91750612	91748612	4.92453	30.3691	3.81357	14.0604	4.34194	20.2793
Olig1-Olig2_BIN_163	Olig1-Olig2_BIN_284	91750612	91754612	91752612	5.0512	33.1561	4.02677	16.2997	4.47838	22.2909
