# Supplementary material for: YY1 and CTCF orchestrate a 3D chromatin looping switch during early neural lineage commitment
Source: HighWire-hosted journal article supplement (doi:10.1101/gr.215160.116), 2017-05-23
Supplement: Supplemental_custom_scripts_5C_analysis.zip [file Olig2_4C_Track.xlsx]

## Sheet: Sheet1
Olig2 gene: chr16:91,225,795-91,228,922				This is in Olig bins 152-153, will start with 152 because this is the bin that the TSS's are in
					pNPC 1		ES Serum 1		ES 2i 1
Bin of Interest	Other Bin	Other Bin Start	Other Bin Stop	Other Bin Middle	log2(Relative Interaction Frequency)	Relative Interaction Frequency	log2(Relative Interaction Frequency)	Relative Interaction Frequency	log2(Relative Interaction Frequency)	Relative Interaction Frequency
Olig1-Olig2_BIN_152	Olig1-Olig2_BIN_000	90614612	90618612	90616612	3.80928	14.0187	3.08482	8.48442	4.13325	17.5482
Olig1-Olig2_BIN_152	Olig1-Olig2_BIN_001	90618612	90622612	90620612	3.80928	14.0187	3.08482	8.48442	4.13325	17.5482
Olig1-Olig2_BIN_152	Olig1-Olig2_BIN_002	90622612	90626612	90624612	4.52848	23.0785	3.57233	11.8954	4.45799	21.9781
Olig1-Olig2_BIN_152	Olig1-Olig2_BIN_003	90626612	90630612	90628612	4.52848	23.0785	3.57233	11.8954	4.45799	21.9781
Olig1-Olig2_BIN_152	Olig1-Olig2_BIN_004	90630612	90634612	90632612	4.891	29.6714	3.79102	13.8424	5.02085	32.4658
Olig1-Olig2_BIN_152	Olig1-Olig2_BIN_005	90634612	90638612	90636612	4.891	29.6714	3.79102	13.8424	5.02085	32.4658
Olig1-Olig2_BIN_152	Olig1-Olig2_BIN_006	90638612	90642612	90640612	4.68426	25.7101	3.93082	15.2509	5.15995	35.7521
Olig1-Olig2_BIN_152	Olig1-Olig2_BIN_007	90642612	90646612	90644612	4.37076	20.6885	4.22775	18.7362	4.77106	27.3043
Olig1-Olig2_BIN_152	Olig1-Olig2_BIN_008	90646612	90650612	90648612	4.37076	20.6885	4.22775	18.7362	4.77106	27.3043
Olig1-Olig2_BIN_152	Olig1-Olig2_BIN_009	90650612	90654612	90652612	3.90051	14.9338	4.67315	25.5129	4.18771	18.2232
Olig1-Olig2_BIN_152	Olig1-Olig2_BIN_010	90654612	90658612	90656612	3.90051	14.9338	4.67315	25.5129	4.18771	18.2232
Olig1-Olig2_BIN_152	Olig1-Olig2_BIN_011	90658612	90662612	90660612	3.90051	14.9338	4.67315	25.5129	4.18771	18.2232
Olig1-Olig2_BIN_152	Olig1-Olig2_BIN_012	90662612	90666612	90664612	4.07281	16.8283	4.22081	18.6461	4.10375	17.193
Olig1-Olig2_BIN_152	Olig1-Olig2_BIN_013	90666612	90670612	90668612	4.31737	19.9369	4.12336	17.4283	4.06114	16.6926
Olig1-Olig2_BIN_152	Olig1-Olig2_BIN_014	90670612	90674612	90672612	4.36814	20.651	3.87534	14.6756	4.01026	16.1141
Olig1-Olig2_BIN_152	Olig1-Olig2_BIN_015	90674612	90678612	90676612	4.42096	21.4211	3.90864	15.0182	4.11865	17.3715
Olig1-Olig2_BIN_152	Olig1-Olig2_BIN_016	90678612	90682612	90680612	4.42096	21.4211	3.90864	15.0182	4.11865	17.3715
Olig1-Olig2_BIN_152	Olig1-Olig2_BIN_017	90682612	90686612	90684612	4.46508	22.0864	3.83518	14.2726	4.37456	20.7431
Olig1-Olig2_BIN_152	Olig1-Olig2_BIN_018	90686612	90690612	90688612	4.46141	22.0302	3.6991	12.988	4.2843	19.4851
Olig1-Olig2_BIN_152	Olig1-Olig2_BIN_019	90690612	90694612	90692612	4.76433	27.1772	4.12503	17.4485	4.82321	28.3094
Olig1-Olig2_BIN_152	Olig1-Olig2_BIN_020	90694612	90698612	90696612	4.17232	18.0299	4.26379	19.2101	4.90131	29.8841
Olig1-Olig2_BIN_152	Olig1-Olig2_BIN_021	90698612	90702612	90700612	3.43408	10.8084	4.3563	20.4822	4.71959	26.3475
Olig1-Olig2_BIN_152	Olig1-Olig2_BIN_022	90702612	90706612	90704612	2.90198	7.47454	4.4488	21.8385	4.67815	25.6014
Olig1-Olig2_BIN_152	Olig1-Olig2_BIN_023	90706612	90710612	90708612	2.90198	7.47454	4.4488	21.8385	4.67815	25.6014
Olig1-Olig2_BIN_152	Olig1-Olig2_BIN_024	90710612	90714612	90712612	2.90198	7.47454	4.4488	21.8385	4.67815	25.6014
Olig1-Olig2_BIN_152	Olig1-Olig2_BIN_025	90714612	90718612	90716612	1.58849	3.00735	4.58755	24.0432	4.26531	19.2303
Olig1-Olig2_BIN_152	Olig1-Olig2_BIN_026	90718612	90722612	90720612	4.87944	29.4346	3.25238	9.5294	5.26548	38.4651
Olig1-Olig2_BIN_152	Olig1-Olig2_BIN_027	90722612	90726612	90724612	4.87944	29.4346	3.25238	9.5294	5.26548	38.4651
Olig1-Olig2_BIN_152	Olig1-Olig2_BIN_028	90726612	90730612	90728612	4.81644	28.1768	3.6201	12.2958	4.9014	29.886
Olig1-Olig2_BIN_152	Olig1-Olig2_BIN_029	90730612	90734612	90732612	4.76237	27.1403	3.4539	10.9579	4.53813	23.2335
Olig1-Olig2_BIN_152	Olig1-Olig2_BIN_030	90734612	90738612	90736612	4.76237	27.1403	3.4539	10.9579	4.53813	23.2335
Olig1-Olig2_BIN_152	Olig1-Olig2_BIN_031	90738612	90742612	90740612	4.49041	22.4774	3.4132	10.6531	4.37127	20.6959
Olig1-Olig2_BIN_152	Olig1-Olig2_BIN_032	90742612	90746612	90744612	3.86922	14.6134	3.59921	12.1191	4.14973	17.7498
Olig1-Olig2_BIN_152	Olig1-Olig2_BIN_033	90746612	90750612	90748612	3.73804	13.3432	3.51114	11.4014	4.11811	17.365
Olig1-Olig2_BIN_152	Olig1-Olig2_BIN_034	90750612	90754612	90752612	3.82445	14.1668	3.39582	10.5255	4.13773	17.6028
Olig1-Olig2_BIN_152	Olig1-Olig2_BIN_035	90754612	90758612	90756612	3.65489	12.5959	3.4396	10.8499	4.17874	18.1103
Olig1-Olig2_BIN_152	Olig1-Olig2_BIN_036	90758612	90762612	90760612	4.02897	16.3245	3.62694	12.3543	4.26243	19.192
Olig1-Olig2_BIN_152	Olig1-Olig2_BIN_037	90762612	90766612	90764612	4.11688	17.3502	3.4462	10.8995	4.28543	19.5004
Olig1-Olig2_BIN_152	Olig1-Olig2_BIN_038	90766612	90770612	90768612	4.12699	17.4722	3.02105	8.11757	4.64643	25.0446
Olig1-Olig2_BIN_152	Olig1-Olig2_BIN_039	90770612	90774612	90772612	4.12699	17.4722	3.02105	8.11757	4.64643	25.0446
Olig1-Olig2_BIN_152	Olig1-Olig2_BIN_040	90774612	90778612	90776612	3.97242	15.697	3.35905	10.2607	3.96507	15.6173
Olig1-Olig2_BIN_152	Olig1-Olig2_BIN_041	90778612	90782612	90780612	4.01673	16.1867	3.25432	9.54217	3.9506	15.4614
Olig1-Olig2_BIN_152	Olig1-Olig2_BIN_042	90782612	90786612	90784612	3.77258	13.6666	3.26519	9.61433	3.74744	13.4305
Olig1-Olig2_BIN_152	Olig1-Olig2_BIN_043	90786612	90790612	90788612	3.93765	15.3233	3.32605	10.0286	3.74771	13.433
Olig1-Olig2_BIN_152	Olig1-Olig2_BIN_044	90790612	90794612	90792612	4.08462	16.9665	3.36024	10.2691	3.59325	12.0691
Olig1-Olig2_BIN_152	Olig1-Olig2_BIN_045	90794612	90798612	90796612	4.19962	18.3744	3.30205	9.86317	4.02602	16.2912
Olig1-Olig2_BIN_152	Olig1-Olig2_BIN_046	90798612	90802612	90800612	4.45284	21.8998	3.31299	9.93824	4.05869	16.6644
Olig1-Olig2_BIN_152	Olig1-Olig2_BIN_047	90802612	90806612	90804612	5.0444	33.0002	3.5163	11.4423	4.11809	17.3647
Olig1-Olig2_BIN_152	Olig1-Olig2_BIN_048	90806612	90810612	90808612	4.81052	28.0614	3.7409	13.3697	4.36462	20.6007
Olig1-Olig2_BIN_152	Olig1-Olig2_BIN_049	90810612	90814612	90812612	4.522	22.9751	4.0093	16.1035	4.75431	26.9892
Olig1-Olig2_BIN_152	Olig1-Olig2_BIN_050	90814612	90818612	90816612	4.51124	22.8044	4.23005	18.766	4.83254	28.493
Olig1-Olig2_BIN_152	Olig1-Olig2_BIN_051	90818612	90822612	90820612	4.52193	22.974	4.23188	18.7898	4.73172	26.5698
Olig1-Olig2_BIN_152	Olig1-Olig2_BIN_052	90822612	90826612	90824612	4.64932	25.0948	4.2905	19.569	4.93244	30.536
Olig1-Olig2_BIN_152	Olig1-Olig2_BIN_053	90826612	90830612	90828612	4.99723	31.9387	4.44661	21.8054	4.95558	31.0297
Olig1-Olig2_BIN_152	Olig1-Olig2_BIN_054	90830612	90834612	90832612	4.99723	31.9387	4.44661	21.8054	4.95558	31.0297
Olig1-Olig2_BIN_152	Olig1-Olig2_BIN_055	90834612	90838612	90836612	5.45417	43.8397	4.49987	22.6254	4.8335	28.512
Olig1-Olig2_BIN_152	Olig1-Olig2_BIN_056	90838612	90842612	90840612	5.45417	43.8397	4.49987	22.6254	4.8335	28.512
Olig1-Olig2_BIN_152	Olig1-Olig2_BIN_057	90842612	90846612	90844612	5.23405	37.6363	4.62899	24.7436	4.45644	21.9544
Olig1-Olig2_BIN_152	Olig1-Olig2_BIN_058	90846612	90850612	90848612	4.54932	23.4143	4.30165	19.7209	4.47014	22.1639
Olig1-Olig2_BIN_152	Olig1-Olig2_BIN_059	90850612	90854612	90852612	4.18681	18.2119	3.90096	14.9385	4.78256	27.523
Olig1-Olig2_BIN_152	Olig1-Olig2_BIN_060	90854612	90858612	90856612	4.18681	18.2119	3.90096	14.9385	4.78256	27.523
Olig1-Olig2_BIN_152	Olig1-Olig2_BIN_061	90858612	90862612	90860612	4.662	25.3164	4.07277	16.8278	4.88032	29.4525
Olig1-Olig2_BIN_152	Olig1-Olig2_BIN_062	90862612	90866612	90864612	4.75317	26.9679	4.24365	18.9438	4.95047	30.9201
Olig1-Olig2_BIN_152	Olig1-Olig2_BIN_063	90866612	90870612	90868612	5.02649	32.5931	4.18953	18.2462	5.04517	33.0177
Olig1-Olig2_BIN_152	Olig1-Olig2_BIN_064	90870612	90874612	90872612	5.02649	32.5931	4.18953	18.2462	5.04517	33.0177
Olig1-Olig2_BIN_152	Olig1-Olig2_BIN_065	90874612	90878612	90876612	4.99275	31.8395	4.31009	19.8366	4.88607	29.5701
Olig1-Olig2_BIN_152	Olig1-Olig2_BIN_066	90878612	90882612	90880612	5.49146	44.9877	4.35831	20.5108	5.14312	35.3374
Olig1-Olig2_BIN_152	Olig1-Olig2_BIN_067	90882612	90886612	90884612	5.49146	44.9877	4.35831	20.5108	5.14312	35.3374
Olig1-Olig2_BIN_152	Olig1-Olig2_BIN_068	90886612	90890612	90888612	5.49146	44.9877	4.35831	20.5108	5.14312	35.3374
Olig1-Olig2_BIN_152	Olig1-Olig2_BIN_069	90890612	90894612	90892612	5.40684	42.4249	4.20465	18.4385	4.88443	29.5366
Olig1-Olig2_BIN_152	Olig1-Olig2_BIN_070	90894612	90898612	90896612	5.46961	44.3116	4.0362	16.4065	4.82984	28.4398
Olig1-Olig2_BIN_152	Olig1-Olig2_BIN_071	90898612	90902612	90900612	5.03602	32.8091	3.99816	15.9796	5.01603	32.3576
Olig1-Olig2_BIN_152	Olig1-Olig2_BIN_072	90902612	90906612	90904612	4.89903	29.837	4.21393	18.5575	4.90122	29.8823
Olig1-Olig2_BIN_152	Olig1-Olig2_BIN_073	90906612	90910612	90908612	5.15292	35.5781	4.04128	16.4644	4.60719	24.3726
Olig1-Olig2_BIN_152	Olig1-Olig2_BIN_074	90910612	90914612	90912612	5.03941	32.8862	4.17099	18.0133	4.43828	21.6798
Olig1-Olig2_BIN_152	Olig1-Olig2_BIN_075	90914612	90918612	90916612	5.04041	32.9089	4.22182	18.6593	4.26835	19.2709
Olig1-Olig2_BIN_152	Olig1-Olig2_BIN_076	90918612	90922612	90920612	4.99106	31.8024	4.12621	17.4628	4.32697	20.07
Olig1-Olig2_BIN_152	Olig1-Olig2_BIN_077	90922612	90926612	90924612	5.01392	32.3102	4.11366	17.3115	4.34357	20.3023
Olig1-Olig2_BIN_152	Olig1-Olig2_BIN_078	90926612	90930612	90928612	5.15794	35.7022	4.12961	17.5039	4.49868	22.6068
Olig1-Olig2_BIN_152	Olig1-Olig2_BIN_079	90930612	90934612	90932612	5.1212	34.8044	4.28697	19.5212	4.56759	23.7128
Olig1-Olig2_BIN_152	Olig1-Olig2_BIN_080	90934612	90938612	90936612	5.04884	33.1019	4.47161	22.1865	4.70023	25.9963
Olig1-Olig2_BIN_152	Olig1-Olig2_BIN_081	90938612	90942612	90940612	5.22295	37.3478	4.52705	23.0557	4.57051	23.7607
Olig1-Olig2_BIN_152	Olig1-Olig2_BIN_082	90942612	90946612	90944612	5.13049	35.0292	4.43108	21.5718	4.37272	20.7167
Olig1-Olig2_BIN_152	Olig1-Olig2_BIN_083	90946612	90950612	90948612	5.04578	33.0318	4.46951	22.1542	4.43876	21.687
Olig1-Olig2_BIN_152	Olig1-Olig2_BIN_084	90950612	90954612	90952612	5.06641	33.5074	4.51101	22.8008	4.49792	22.5948
Olig1-Olig2_BIN_152	Olig1-Olig2_BIN_085	90954612	90958612	90956612	4.9797	31.5528	4.30585	19.7783	4.34049	20.259
Olig1-Olig2_BIN_152	Olig1-Olig2_BIN_086	90958612	90962612	90960612	5.1853	36.3857	4.4133	21.3076	4.60581	24.3492
Olig1-Olig2_BIN_152	Olig1-Olig2_BIN_087	90962612	90966612	90964612	5.1488	35.4767	4.38689	20.9211	4.59966	24.2458
Olig1-Olig2_BIN_152	Olig1-Olig2_BIN_088	90966612	90970612	90968612	5.11029	34.5423	4.29568	19.6394	4.62026	24.5945
Olig1-Olig2_BIN_152	Olig1-Olig2_BIN_089	90970612	90974612	90972612	5.11092	34.5572	4.23175	18.7881	4.70679	26.1147
Olig1-Olig2_BIN_152	Olig1-Olig2_BIN_090	90974612	90978612	90976612	5.23574	37.6804	4.28141	19.4461	4.87565	29.3574
Olig1-Olig2_BIN_152	Olig1-Olig2_BIN_091	90978612	90982612	90980612	5.22803	37.4796	4.40655	21.2082	4.87329	29.3093
Olig1-Olig2_BIN_152	Olig1-Olig2_BIN_092	90982612	90986612	90984612	5.24664	37.9661	4.40379	21.1676	5.00305	32.0676
Olig1-Olig2_BIN_152	Olig1-Olig2_BIN_093	90986612	90990612	90988612	5.44694	43.6206	4.5709	23.7672	5.01142	32.2543
Olig1-Olig2_BIN_152	Olig1-Olig2_BIN_094	90990612	90994612	90992612	5.44694	43.6206	4.5709	23.7672	5.01142	32.2543
Olig1-Olig2_BIN_152	Olig1-Olig2_BIN_095	90994612	90998612	90996612	5.43123	43.1482	4.53749	23.2231	5.03942	32.8863
Olig1-Olig2_BIN_152	Olig1-Olig2_BIN_096	90998612	91002612	91000612	5.52602	46.0785	4.46846	22.1382	5.11298	34.6067
Olig1-Olig2_BIN_152	Olig1-Olig2_BIN_097	91002612	91006612	91004612	5.32356	40.0452	4.33655	20.2037	4.38523	20.897
Olig1-Olig2_BIN_152	Olig1-Olig2_BIN_098	91006612	91010612	91008612	5.70069	52.0089	4.66793	25.4206	4.68752	25.7683
Olig1-Olig2_BIN_152	Olig1-Olig2_BIN_099	91010612	91014612	91012612	5.66781	50.8371	4.52998	23.1026	4.93368	30.5624
Olig1-Olig2_BIN_152	Olig1-Olig2_BIN_100	91014612	91018612	91016612	5.66781	50.8371	4.52998	23.1026	4.93368	30.5624
Olig1-Olig2_BIN_152	Olig1-Olig2_BIN_101	91018612	91022612	91020612	5.73083	53.1069	4.71357	26.2377	5.1509	35.5284
Olig1-Olig2_BIN_152	Olig1-Olig2_BIN_102	91022612	91026612	91024612	5.66995	50.9125	4.49083	22.4841	5.31941	39.9302
Olig1-Olig2_BIN_152	Olig1-Olig2_BIN_103	91026612	91030612	91028612	5.64585	50.0692	4.53272	23.1465	5.32318	40.0347
Olig1-Olig2_BIN_152	Olig1-Olig2_BIN_104	91030612	91034612	91032612	5.92483	60.7509	4.83556	28.5528	5.40576	42.3933
Olig1-Olig2_BIN_152	Olig1-Olig2_BIN_105	91034612	91038612	91036612	5.96641	62.5272	5.03347	32.7512	5.29765	39.3324
Olig1-Olig2_BIN_152	Olig1-Olig2_BIN_106	91038612	91042612	91040612	6.41905	85.5712	4.91388	30.1456	5.4204	42.8257
Olig1-Olig2_BIN_152	Olig1-Olig2_BIN_107	91042612	91046612	91044612	6.64336	99.9659	5.05405	33.2216	5.41675	42.7175
Olig1-Olig2_BIN_152	Olig1-Olig2_BIN_108	91046612	91050612	91048612	6.5463	93.4615	4.94088	30.7152	5.29605	39.2888
Olig1-Olig2_BIN_152	Olig1-Olig2_BIN_109	91050612	91054612	91052612	6.42843	86.1294	5.01796	32.4008	5.13264	35.0816
Olig1-Olig2_BIN_152	Olig1-Olig2_BIN_110	91054612	91058612	91056612	6.21297	74.1804	4.96715	31.2797	5.06084	33.3784
Olig1-Olig2_BIN_152	Olig1-Olig2_BIN_111	91058612	91062612	91060612	6.25529	76.3891	4.96577	31.2497	5.03259	32.731
Olig1-Olig2_BIN_152	Olig1-Olig2_BIN_112	91062612	91066612	91064612	6.29138	78.3238	5.02181	32.4875	5.0671	33.5236
Olig1-Olig2_BIN_152	Olig1-Olig2_BIN_113	91066612	91070612	91068612	6.24392	75.7892	5.05113	33.1544	5.23744	37.7248
Olig1-Olig2_BIN_152	Olig1-Olig2_BIN_114	91070612	91074612	91072612	6.72624	105.876	5.4163	42.704	5.56036	47.1884
Olig1-Olig2_BIN_152	Olig1-Olig2_BIN_115	91074612	91078612	91076612	7.3723	165.685	5.70566	52.1884	6.02376	65.0628
Olig1-Olig2_BIN_152	Olig1-Olig2_BIN_116	91078612	91082612	91080612	7.3723	165.685	5.70566	52.1884	6.02376	65.0628
Olig1-Olig2_BIN_152	Olig1-Olig2_BIN_117	91082612	91086612	91084612	7.23931	151.094	5.77293	54.6796	6.06643	67.0157
Olig1-Olig2_BIN_152	Olig1-Olig2_BIN_118	91086612	91090612	91088612	7.23935	151.099	5.7658	54.4098	6.10408	68.7879
Olig1-Olig2_BIN_152	Olig1-Olig2_BIN_119	91090612	91094612	91092612	6.99996	127.996	5.7066	52.2224	6.13943	70.4939
Olig1-Olig2_BIN_152	Olig1-Olig2_BIN_120	91094612	91098612	91096612	6.97826	126.086	5.63235	49.603	6.13406	70.2323
Olig1-Olig2_BIN_152	Olig1-Olig2_BIN_121	91098612	91102612	91100612	6.85891	116.075	5.80619	55.9548	6.06999	67.1815
Olig1-Olig2_BIN_152	Olig1-Olig2_BIN_122	91102612	91106612	91104612	6.90482	119.828	5.49745	45.1748	5.73605	53.2996
Olig1-Olig2_BIN_152	Olig1-Olig2_BIN_123	91106612	91110612	91108612	6.67842	102.424	5.69428	51.7785	5.8778	58.8021
Olig1-Olig2_BIN_152	Olig1-Olig2_BIN_124	91110612	91114612	91112612	6.73291	106.367	5.69733	51.888	5.99371	63.7215
Olig1-Olig2_BIN_152	Olig1-Olig2_BIN_125	91114612	91118612	91116612	6.75587	108.074	5.72727	52.976	6.01406	64.6266
Olig1-Olig2_BIN_152	Olig1-Olig2_BIN_126	91118612	91122612	91120612	6.69552	103.646	5.86676	58.3539	6.0991	68.5506
Olig1-Olig2_BIN_152	Olig1-Olig2_BIN_127	91122612	91126612	91124612	6.92551	121.559	5.93478	61.1712	6.46213	88.165
Olig1-Olig2_BIN_152	Olig1-Olig2_BIN_128	91126612	91130612	91128612	6.93005	121.942	5.93119	61.0193	6.52807	92.2877
Olig1-Olig2_BIN_152	Olig1-Olig2_BIN_129	91130612	91134612	91132612	7.08201	135.487	5.70907	52.3121	6.55207	93.8358
Olig1-Olig2_BIN_152	Olig1-Olig2_BIN_130	91134612	91138612	91136612	7.35567	163.787	5.44057	43.4285	6.55525	94.0431
Olig1-Olig2_BIN_152	Olig1-Olig2_BIN_131	91138612	91142612	91140612	7.35567	163.787	5.44057	43.4285	6.55525	94.0431
Olig1-Olig2_BIN_152	Olig1-Olig2_BIN_132	91142612	91146612	91144612	7.35567	163.787	5.44057	43.4285	6.55525	94.0431
Olig1-Olig2_BIN_152	Olig1-Olig2_BIN_133	91146612	91150612	91148612	7.4195	171.195	5.46919	44.2987	6.32662	80.2605
Olig1-Olig2_BIN_152	Olig1-Olig2_BIN_134	91150612	91154612	91152612	7.84894	230.551	5.73209	53.1533	6.46174	88.1408
Olig1-Olig2_BIN_152	Olig1-Olig2_BIN_135	91154612	91158612	91156612	7.81942	225.88	6.11102	69.1195	6.41132	85.114
Olig1-Olig2_BIN_152	Olig1-Olig2_BIN_136	91158612	91162612	91160612	7.99273	254.712	6.21546	74.3086	6.41866	85.5481
Olig1-Olig2_BIN_152	Olig1-Olig2_BIN_137	91162612	91166612	91164612	7.96246	249.425	6.14287	70.6623	6.54375	93.2965
Olig1-Olig2_BIN_152	Olig1-Olig2_BIN_138	91166612	91170612	91168612	8.1394	281.97	6.1907	73.0442	6.54763	93.5479
Olig1-Olig2_BIN_152	Olig1-Olig2_BIN_139	91170612	91174612	91172612	7.83536	228.391	6.05148	66.325	6.45414	87.6777
Olig1-Olig2_BIN_152	Olig1-Olig2_BIN_140	91174612	91178612	91176612	7.79088	221.457	6.30402	79.0132	6.34252	81.1501
Olig1-Olig2_BIN_152	Olig1-Olig2_BIN_141	91178612	91182612	91180612	7.78528	220.598	6.27706	77.5501	6.44132	86.9019
Olig1-Olig2_BIN_152	Olig1-Olig2_BIN_142	91182612	91186612	91184612	8.22204	298.593	6.22132	74.6111	6.38357	83.492
Olig1-Olig2_BIN_152	Olig1-Olig2_BIN_143	91186612	91190612	91188612	8.29725	314.572	6.31426	79.576	6.3121	79.4566
Olig1-Olig2_BIN_152	Olig1-Olig2_BIN_144	91190612	91194612	91192612	8.78784	441.982	6.27088	77.219	6.1816	72.5849
Olig1-Olig2_BIN_152	Olig1-Olig2_BIN_145	91194612	91198612	91196612	8.76219	434.192	6.43222	86.356	6.33268	80.5986
Olig1-Olig2_BIN_152	Olig1-Olig2_BIN_146	91198612	91202612	91200612	8.50293	362.775	6.8914	118.718	6.34119	81.0755
Olig1-Olig2_BIN_152	Olig1-Olig2_BIN_147	91202612	91206612	91204612	8.44916	349.503	7.54121	186.264	6.91469	120.65
Olig1-Olig2_BIN_152	Olig1-Olig2_BIN_148	91206612	91210612	91208612	8.44916	349.503	7.54121	186.264	6.91469	120.65
Olig1-Olig2_BIN_152	Olig1-Olig2_BIN_149	91210612	91214612	91212612	8.67426	408.52	7.77928	219.684	7.02057	129.838
Olig1-Olig2_BIN_152	Olig1-Olig2_BIN_150	91214612	91218612	91216612	9.53913	743.986	8.07726	270.084	8.26435	307.481
Olig1-Olig2_BIN_152	Olig1-Olig2_BIN_151	91218612	91222612	91220612	11.1164	2220.02	9.46269	705.594	10.6572	1614.83
Olig1-Olig2_BIN_152	Olig1-Olig2_BIN_152	91222612	91226612	91224612	10.8398	1832.81	9.60706	779.851	10.4617	1410.2
Olig1-Olig2_BIN_152	Olig1-Olig2_BIN_153	91226612	91230612	91228612	10.4985	1446.7	9.4377	693.474	10.2177	1190.82
Olig1-Olig2_BIN_152	Olig1-Olig2_BIN_154	91230612	91234612	91232612	10.3094	1268.96	9.22135	596.901	9.93753	980.607
Olig1-Olig2_BIN_152	Olig1-Olig2_BIN_155	91234612	91238612	91236612	9.77191	874.255	8.96678	500.346	9.48019	714.205
Olig1-Olig2_BIN_152	Olig1-Olig2_BIN_156	91238612	91242612	91240612	8.90911	480.741	7.97519	251.635	8.50546	363.412
Olig1-Olig2_BIN_152	Olig1-Olig2_BIN_157	91242612	91246612	91244612	8.6156	392.243	7.82834	227.282	8.23409	301.099
Olig1-Olig2_BIN_152	Olig1-Olig2_BIN_158	91246612	91250612	91248612	8.20773	295.647	7.52742	184.492	8.13411	280.938
Olig1-Olig2_BIN_152	Olig1-Olig2_BIN_159	91250612	91254612	91252612	8.94888	494.175	7.80548	223.709	8.05445	265.846
Olig1-Olig2_BIN_152	Olig1-Olig2_BIN_160	91254612	91258612	91256612	9.36211	658.077	7.48539	179.195	7.98475	253.308
Olig1-Olig2_BIN_152	Olig1-Olig2_BIN_161	91258612	91262612	91260612	9.42381	686.829	7.33164	161.081	7.85919	232.194
Olig1-Olig2_BIN_152	Olig1-Olig2_BIN_162	91262612	91266612	91264612	9.42381	686.829	7.33164	161.081	7.85919	232.194
Olig1-Olig2_BIN_152	Olig1-Olig2_BIN_163	91266612	91270612	91268612	9.9093	961.605	7.04558	132.109	7.70666	208.899
Olig1-Olig2_BIN_152	Olig1-Olig2_BIN_164	91270612	91274612	91272612	9.90913	961.491	6.9115	120.384	7.80955	224.341
Olig1-Olig2_BIN_152	Olig1-Olig2_BIN_165	91274612	91278612	91276612	8.81155	449.305	6.98963	127.084	7.56355	189.171
Olig1-Olig2_BIN_152	Olig1-Olig2_BIN_166	91278612	91282612	91280612	8.52382	368.065	6.92114	121.191	7.54832	187.185
Olig1-Olig2_BIN_152	Olig1-Olig2_BIN_167	91282612	91286612	91284612	8.31897	319.345	6.78152	110.012	7.33687	161.666
Olig1-Olig2_BIN_152	Olig1-Olig2_BIN_168	91286612	91290612	91288612	8.31897	319.345	6.78152	110.012	7.33687	161.666
Olig1-Olig2_BIN_152	Olig1-Olig2_BIN_169	91290612	91294612	91292612	8.56763	379.416	6.62099	98.4276	7.14579	141.611
Olig1-Olig2_BIN_152	Olig1-Olig2_BIN_170	91294612	91298612	91296612	8.61025	390.789	6.51057	91.1752	7.21224	148.286
Olig1-Olig2_BIN_152	Olig1-Olig2_BIN_171	91298612	91302612	91300612	9.36394	658.913	6.25233	76.2321	7.16929	143.937
Olig1-Olig2_BIN_152	Olig1-Olig2_BIN_172	91302612	91306612	91304612	9.11247	553.511	6.58585	96.0594	7.31153	158.85
Olig1-Olig2_BIN_152	Olig1-Olig2_BIN_173	91306612	91310612	91308612	9.3175	638.038	6.85124	115.459	7.27771	155.171
Olig1-Olig2_BIN_152	Olig1-Olig2_BIN_174	91310612	91314612	91312612	9.3175	638.038	6.85124	115.459	7.27771	155.171
Olig1-Olig2_BIN_152	Olig1-Olig2_BIN_175	91314612	91318612	91316612	8.37614	332.254	6.8163	112.697	7.14114	141.155
Olig1-Olig2_BIN_152	Olig1-Olig2_BIN_176	91318612	91322612	91320612	8.37614	332.254	6.8163	112.697	7.14114	141.155
Olig1-Olig2_BIN_152	Olig1-Olig2_BIN_177	91322612	91326612	91324612	7.75988	216.749	6.7225	105.602	6.95949	124.456
Olig1-Olig2_BIN_152	Olig1-Olig2_BIN_178	91326612	91330612	91328612	7.44597	174.366	6.61749	98.1893	6.86881	116.874
Olig1-Olig2_BIN_152	Olig1-Olig2_BIN_179	91330612	91334612	91332612	7.44597	174.366	6.61749	98.1893	6.86881	116.874
Olig1-Olig2_BIN_152	Olig1-Olig2_BIN_180	91334612	91338612	91336612	7.44597	174.366	6.61749	98.1893	6.86881	116.874
Olig1-Olig2_BIN_152	Olig1-Olig2_BIN_181	91338612	91342612	91340612	7.19939	146.971	6.69149	103.357	6.96811	125.202
Olig1-Olig2_BIN_152	Olig1-Olig2_BIN_182	91342612	91346612	91344612	7.89257	237.63	7.00671	128.596	7.21021	148.078
Olig1-Olig2_BIN_152	Olig1-Olig2_BIN_183	91346612	91350612	91348612	7.75104	215.424	6.82001	112.987	7.22562	149.668
Olig1-Olig2_BIN_152	Olig1-Olig2_BIN_184	91350612	91354612	91352612	7.72776	211.976	6.62046	98.3915	7.13486	140.542
Olig1-Olig2_BIN_152	Olig1-Olig2_BIN_185	91354612	91358612	91356612	7.75985	216.744	6.62824	98.9233	7.188	145.815
Olig1-Olig2_BIN_152	Olig1-Olig2_BIN_186	91358612	91362612	91360612	7.62108	196.868	5.90247	59.8164	7.00204	128.181
Olig1-Olig2_BIN_152	Olig1-Olig2_BIN_187	91362612	91366612	91364612	7.2375	150.905	5.60028	48.5122	6.94938	123.586
Olig1-Olig2_BIN_152	Olig1-Olig2_BIN_188	91366612	91370612	91368612	7.24112	151.285	5.46828	44.2708	6.67072	101.879
Olig1-Olig2_BIN_152	Olig1-Olig2_BIN_189	91370612	91374612	91372612	7.07002	134.365	5.61047	48.8563	6.53721	92.8742
Olig1-Olig2_BIN_152	Olig1-Olig2_BIN_190	91374612	91378612	91376612	6.73823	106.76	5.64862	50.1653	6.25161	76.1944
Olig1-Olig2_BIN_152	Olig1-Olig2_BIN_191	91378612	91382612	91380612	6.63703	99.5281	5.63143	49.5713	5.94299	61.5201
Olig1-Olig2_BIN_152	Olig1-Olig2_BIN_192	91382612	91386612	91384612	6.57064	95.0515	5.65941	50.5418	5.79319	55.4527
Olig1-Olig2_BIN_152	Olig1-Olig2_BIN_193	91386612	91390612	91388612	6.5039	90.7546	5.63848	49.814	5.71678	52.5922
Olig1-Olig2_BIN_152	Olig1-Olig2_BIN_194	91390612	91394612	91392612	6.3841	83.5229	5.59029	48.1777	5.56277	47.2671
Olig1-Olig2_BIN_152	Olig1-Olig2_BIN_195	91394612	91398612	91396612	6.52888	92.3399	5.33019	40.2296	5.92305	60.6758
Olig1-Olig2_BIN_152	Olig1-Olig2_BIN_196	91398612	91402612	91400612	6.44332	87.0224	5.28072	38.8735	5.85507	57.883
Olig1-Olig2_BIN_152	Olig1-Olig2_BIN_197	91402612	91406612	91404612	6.25773	76.5179	5.14778	35.4516	5.56103	47.2103
Olig1-Olig2_BIN_152	Olig1-Olig2_BIN_198	91406612	91410612	91408612	6.1838	72.696	5.23929	37.7732	5.41707	42.7267
Olig1-Olig2_BIN_152	Olig1-Olig2_BIN_199	91410612	91414612	91412612	6.05648	66.5553	5.22885	37.5008	5.38898	41.9028
Olig1-Olig2_BIN_152	Olig1-Olig2_BIN_200	91414612	91418612	91416612	5.86463	58.2679	5.19199	36.5547	5.44042	43.4239
Olig1-Olig2_BIN_152	Olig1-Olig2_BIN_201	91418612	91422612	91420612	5.71168	52.4066	5.20936	36.9977	5.4461	43.5951
Olig1-Olig2_BIN_152	Olig1-Olig2_BIN_202	91422612	91426612	91424612	5.44461	43.5503	5.24198	37.8436	5.49929	45.2326
Olig1-Olig2_BIN_152	Olig1-Olig2_BIN_203	91426612	91430612	91428612	5.12401	34.8723	5.24278	37.8646	5.60325	48.6124
Olig1-Olig2_BIN_152	Olig1-Olig2_BIN_204	91430612	91434612	91432612	5.02381	32.5324	5.05675	33.2838	5.71207	52.4208
Olig1-Olig2_BIN_152	Olig1-Olig2_BIN_205	91434612	91438612	91436612	5.13388	35.1117	5.0761	33.7334	5.73441	53.2389
Olig1-Olig2_BIN_152	Olig1-Olig2_BIN_206	91438612	91442612	91440612	5.12348	34.8595	4.9316	30.5183	5.63752	49.7809
Olig1-Olig2_BIN_152	Olig1-Olig2_BIN_207	91442612	91446612	91444612	5.4302	43.1173	4.58565	24.0114	5.66464	50.7256
Olig1-Olig2_BIN_152	Olig1-Olig2_BIN_208	91446612	91450612	91448612	5.69616	51.8458	4.3155	19.9111	5.55904	47.1453
Olig1-Olig2_BIN_152	Olig1-Olig2_BIN_209	91450612	91454612	91452612	5.84787	57.5949	4.70552	26.0917	5.72954	53.0595
Olig1-Olig2_BIN_152	Olig1-Olig2_BIN_210	91454612	91458612	91456612	6.10828	68.9882	4.96801	31.2984	6.0523	66.3629
Olig1-Olig2_BIN_152	Olig1-Olig2_BIN_211	91458612	91462612	91460612	6.10828	68.9882	4.96801	31.2984	6.0523	66.3629
Olig1-Olig2_BIN_152	Olig1-Olig2_BIN_212	91462612	91466612	91464612	6.12103	69.6006	5.07863	33.7925	5.96021	62.2591
Olig1-Olig2_BIN_152	Olig1-Olig2_BIN_213	91466612	91470612	91468612	6.40685	84.8502	5.03986	32.8965	5.77054	54.589
Olig1-Olig2_BIN_152	Olig1-Olig2_BIN_214	91470612	91474612	91472612	6.41241	85.1783	4.99634	31.9188	5.33492	40.3618
Olig1-Olig2_BIN_152	Olig1-Olig2_BIN_215	91474612	91478612	91476612	6.60062	97.0477	4.99505	31.8903	5.43197	43.1705
Olig1-Olig2_BIN_152	Olig1-Olig2_BIN_216	91478612	91482612	91480612	6.61196	97.8131	5.00756	32.1682	5.10972	34.5287
Olig1-Olig2_BIN_152	Olig1-Olig2_BIN_217	91482612	91486612	91484612	6.44051	86.8536	4.94283	30.7567	5.19356	36.5946
Olig1-Olig2_BIN_152	Olig1-Olig2_BIN_218	91486612	91490612	91488612	6.52912	92.3549	4.92434	30.365	5.47664	44.5281
Olig1-Olig2_BIN_152	Olig1-Olig2_BIN_219	91490612	91494612	91492612	6.46162	88.1336	4.92322	30.3414	5.34213	40.5641
Olig1-Olig2_BIN_152	Olig1-Olig2_BIN_220	91494612	91498612	91496612	5.92652	60.822	4.88321	29.5117	5.05529	33.2502
Olig1-Olig2_BIN_152	Olig1-Olig2_BIN_221	91498612	91502612	91500612	5.75474	53.9946	4.6839	25.7037	5.52891	46.1707
Olig1-Olig2_BIN_152	Olig1-Olig2_BIN_222	91502612	91506612	91504612	5.93806	61.3104	5.23328	37.6161	5.66814	50.8487
Olig1-Olig2_BIN_152	Olig1-Olig2_BIN_223	91506612	91510612	91508612	5.87179	58.5577	4.78258	27.5232	5.62365	49.3046
Olig1-Olig2_BIN_152	Olig1-Olig2_BIN_224	91510612	91514612	91512612	5.87179	58.5577	4.78258	27.5232	5.62365	49.3046
Olig1-Olig2_BIN_152	Olig1-Olig2_BIN_225	91514612	91518612	91516612	5.63466	49.6824	4.70497	26.0817	4.88178	29.4825
Olig1-Olig2_BIN_152	Olig1-Olig2_BIN_226	91518612	91522612	91520612	5.18318	36.3324	4.7431	26.7804	5.15312	35.5831
Olig1-Olig2_BIN_152	Olig1-Olig2_BIN_227	91522612	91526612	91524612	5.28428	38.9698	4.63745	24.8892	5.03377	32.7579
Olig1-Olig2_BIN_152	Olig1-Olig2_BIN_228	91526612	91530612	91528612	5.2649	38.4496	4.70392	26.0628	5.00202	32.0448
Olig1-Olig2_BIN_152	Olig1-Olig2_BIN_229	91530612	91534612	91532612	5.07185	33.6341	4.54976	23.4215	4.96857	31.3105
Olig1-Olig2_BIN_152	Olig1-Olig2_BIN_230	91534612	91538612	91536612	5.07419	33.6887	4.63224	24.7994	5.22452	37.3885
Olig1-Olig2_BIN_152	Olig1-Olig2_BIN_231	91538612	91542612	91540612	5.65416	50.3585	4.7401	26.7246	5.28261	38.9246
Olig1-Olig2_BIN_152	Olig1-Olig2_BIN_232	91542612	91546612	91544612	5.67241	50.9995	4.80721	27.9972	5.41388	42.6324
Olig1-Olig2_BIN_152	Olig1-Olig2_BIN_233	91546612	91550612	91548612	5.71823	52.6452	4.79728	27.8051	5.52625	46.0857
Olig1-Olig2_BIN_152	Olig1-Olig2_BIN_234	91550612	91554612	91552612	5.88155	58.9553	4.82254	28.2962	5.41654	42.7111
Olig1-Olig2_BIN_152	Olig1-Olig2_BIN_235	91554612	91558612	91556612	5.80589	55.943	4.73016	26.5412	5.47007	44.3256
Olig1-Olig2_BIN_152	Olig1-Olig2_BIN_236	91558612	91562612	91560612	5.73849	53.3897	4.66613	25.3889	5.40238	42.294
Olig1-Olig2_BIN_152	Olig1-Olig2_BIN_237	91562612	91566612	91564612	5.67389	51.052	4.56459	23.6635	5.28676	39.0368
Olig1-Olig2_BIN_152	Olig1-Olig2_BIN_238	91566612	91570612	91568612	5.64494	50.0375	4.70013	25.9944	5.47303	44.4166
Olig1-Olig2_BIN_152	Olig1-Olig2_BIN_239	91570612	91574612	91572612	5.72186	52.7777	4.79899	27.8381	5.40151	42.2683
Olig1-Olig2_BIN_152	Olig1-Olig2_BIN_240	91574612	91578612	91576612	5.39755	42.1525	4.75475	26.9974	5.03736	32.8395
Olig1-Olig2_BIN_152	Olig1-Olig2_BIN_241	91578612	91582612	91580612	5.39755	42.1525	4.75475	26.9974	5.03736	32.8395
Olig1-Olig2_BIN_152	Olig1-Olig2_BIN_242	91582612	91586612	91584612	5.4518	43.7678	4.79926	27.8434	5.05349	33.2087
Olig1-Olig2_BIN_152	Olig1-Olig2_BIN_243	91586612	91590612	91588612	5.61968	49.1691	4.91424	30.1533	5.19159	36.5447
Olig1-Olig2_BIN_152	Olig1-Olig2_BIN_244	91590612	91594612	91592612	5.51721	45.7981	4.8442	28.7242	5.21063	37.0303
Olig1-Olig2_BIN_152	Olig1-Olig2_BIN_245	91594612	91598612	91596612	5.51721	45.7981	4.8442	28.7242	5.21063	37.0303
Olig1-Olig2_BIN_152	Olig1-Olig2_BIN_246	91598612	91602612	91600612	6.0231	65.0331	4.80431	27.9409	5.41474	42.6578
Olig1-Olig2_BIN_152	Olig1-Olig2_BIN_247	91602612	91606612	91604612	6.03316	65.4883	4.54965	23.4197	5.13981	35.2564
Olig1-Olig2_BIN_152	Olig1-Olig2_BIN_248	91606612	91610612	91608612	5.97393	62.8541	4.43823	21.679	5.1758	36.1468
Olig1-Olig2_BIN_152	Olig1-Olig2_BIN_249	91610612	91614612	91612612	5.54198	46.5909	4.22235	18.6661	4.55199	23.4577
Olig1-Olig2_BIN_152	Olig1-Olig2_BIN_250	91614612	91618612	91616612	5.44621	43.5987	4.1811	18.1399	4.57994	23.9166
Olig1-Olig2_BIN_152	Olig1-Olig2_BIN_251	91618612	91622612	91620612	5.27686	38.7699	4.1227	17.4204	4.51393	22.847
Olig1-Olig2_BIN_152	Olig1-Olig2_BIN_252	91622612	91626612	91624612	5.29099	39.1514	4.12707	17.4732	4.58838	24.0569
Olig1-Olig2_BIN_152	Olig1-Olig2_BIN_253	91626612	91630612	91628612	5.28926	39.1044	4.19406	18.3037	4.84611	28.7624
Olig1-Olig2_BIN_152	Olig1-Olig2_BIN_254	91630612	91634612	91632612	5.2524	38.1179	4.31775	19.9422	4.72603	26.4653
Olig1-Olig2_BIN_152	Olig1-Olig2_BIN_255	91634612	91638612	91636612	5.4366	43.3092	4.09508	17.09	4.56919	23.739
Olig1-Olig2_BIN_152	Olig1-Olig2_BIN_256	91638612	91642612	91640612	5.39334	42.0298	4.02524	16.2824	4.49403	22.5341
Olig1-Olig2_BIN_152	Olig1-Olig2_BIN_257	91642612	91646612	91644612	5.47154	44.371	3.98432	15.827	4.45975	22.0049
Olig1-Olig2_BIN_152	Olig1-Olig2_BIN_258	91646612	91650612	91648612	5.60681	48.7326	3.87607	14.6829	4.51489	22.8622
Olig1-Olig2_BIN_152	Olig1-Olig2_BIN_259	91650612	91654612	91652612	6.58033	95.6922	4.04971	16.5609	5.42815	43.0563
Olig1-Olig2_BIN_152	Olig1-Olig2_BIN_260	91654612	91658612	91656612	6.39419	84.1092	4.15127	17.7688	4.92605	30.4012
Olig1-Olig2_BIN_152	Olig1-Olig2_BIN_261	91658612	91662612	91660612	5.90052	59.7355	3.86761	14.5971	4.4594	21.9995
Olig1-Olig2_BIN_152	Olig1-Olig2_BIN_262	91662612	91666612	91664612	5.90052	59.7355	3.86761	14.5971	4.4594	21.9995
Olig1-Olig2_BIN_152	Olig1-Olig2_BIN_263	91666612	91670612	91668612	5.90052	59.7355	3.86761	14.5971	4.4594	21.9995
Olig1-Olig2_BIN_152	Olig1-Olig2_BIN_264	91670612	91674612	91672612	5.72034	52.7222	3.12608	8.7306	4.85687	28.9778
Olig1-Olig2_BIN_152	Olig1-Olig2_BIN_265	91674612	91678612	91676612	5.72034	52.7222	3.12608	8.7306	4.85687	28.9778
Olig1-Olig2_BIN_152	Olig1-Olig2_BIN_266	91678612	91682612	91680612	5.74182	53.5133	3.8957	14.8841	4.99293	31.8435
Olig1-Olig2_BIN_152	Olig1-Olig2_BIN_267	91682612	91686612	91684612	5.75687	54.0743	3.83028	14.2242	5.09167	34.0994
Olig1-Olig2_BIN_152	Olig1-Olig2_BIN_268	91686612	91690612	91688612	5.85282	57.793	3.79976	13.9265	5.06025	33.3646
Olig1-Olig2_BIN_152	Olig1-Olig2_BIN_269	91690612	91694612	91692612	5.66899	50.8786	3.84548	14.3749	4.94591	30.8225
Olig1-Olig2_BIN_152	Olig1-Olig2_BIN_270	91694612	91698612	91696612	5.79785	55.6323	3.8309	14.2304	4.99705	31.9346
Olig1-Olig2_BIN_152	Olig1-Olig2_BIN_271	91698612	91702612	91700612	5.1744	36.1118	3.44964	10.9256	4.91369	30.1417
Olig1-Olig2_BIN_152	Olig1-Olig2_BIN_272	91702612	91706612	91704612	4.75213	26.9485	3.39267	10.5026	4.88456	29.5392
Olig1-Olig2_BIN_152	Olig1-Olig2_BIN_273	91706612	91710612	91708612	4.448	21.8263	3.50976	11.3905	4.54442	23.335
Olig1-Olig2_BIN_152	Olig1-Olig2_BIN_274	91710612	91714612	91712612	4.2095	18.5006	3.15914	8.93296	4.62446	24.6661
Olig1-Olig2_BIN_152	Olig1-Olig2_BIN_275	91714612	91718612	91716612	4.2095	18.5006	3.15914	8.93296	4.62446	24.6661
Olig1-Olig2_BIN_152	Olig1-Olig2_BIN_276	91718612	91722612	91720612	4.71429	26.2507	3.41823	10.6903	4.79993	27.8563
Olig1-Olig2_BIN_152	Olig1-Olig2_BIN_277	91722612	91726612	91724612	5.54492	46.6861	3.92307	15.1692	4.74686	26.8503
Olig1-Olig2_BIN_152	Olig1-Olig2_BIN_278	91726612	91730612	91728612	5.57372	47.6276	3.94265	15.3764	4.94387	30.7789
Olig1-Olig2_BIN_152	Olig1-Olig2_BIN_279	91730612	91734612	91732612	5.52244	45.9644	3.84657	14.3858	4.91639	30.1981
Olig1-Olig2_BIN_152	Olig1-Olig2_BIN_280	91734612	91738612	91736612	5.52258	45.9687	3.93192	15.2626	4.97496	31.4493
Olig1-Olig2_BIN_152	Olig1-Olig2_BIN_281	91738612	91742612	91740612	5.23066	37.548	3.98622	15.8479	4.82899	28.423
Olig1-Olig2_BIN_152	Olig1-Olig2_BIN_282	91742612	91746612	91744612	4.94252	30.7501	3.84508	14.3709	4.88527	29.5537
Olig1-Olig2_BIN_152	Olig1-Olig2_BIN_283	91746612	91750612	91748612	4.5251	23.0245	3.66332	12.6697	4.59027	24.0885
Olig1-Olig2_BIN_152	Olig1-Olig2_BIN_284	91750612	91754612	91752612	4.33987	20.2502	3.7376	13.3392	4.5431	23.3136
