# Supplementary material for: YY1 and CTCF orchestrate a 3D chromatin looping switch during early neural lineage commitment
Source: HighWire-hosted journal article supplement (doi:10.1101/gr.215160.116), 2017-05-23
Supplement: Supplemental_custom_scripts_5C_analysis.zip [file percent_const_YY1_or_CTCF_2_25_2017 (1).xlsx]

## Sheet: Sheet1
CTCF
2i	percent const
55976	0.472256
serum
50096	0.527687
NPC
28611	0.923945
		26435	number of const sites
YY1
proB	percent const
13737	0.252894
serum
9786	0.354997
NPC
8976	0.387032
		3474	number of const sites
