# Supplementary material for: YY1 and CTCF orchestrate a 3D chromatin looping switch during early neural lineage commitment
Source: HighWire-hosted journal article supplement (doi:10.1101/gr.215160.116), 2017-05-23
Supplement: Supplemental_custom_scripts_5C_analysis.zip [file Sox2_4C_Track.xlsx]

## Sheet: Sheet1
Sox2 gene: chr3:34548927-34551382			This is Sox2 bin 110
					pNPC 1		ES Serum 1		ES 2i 1
Bin of Interest	Other Bin	Other Bin Start	Other Bin Stop	Other Bin Middle	log2(Relative Interaction Frequency)	Relative Interaction Frequency	log2(Relative Interaction Frequency)	Relative Interaction Frequency	log2(Relative Interaction Frequency)	Relative Interaction Frequency
Sox2_BIN_110	Sox2_BIN_000	34108879	34112879	34110879	4.60905	24.404	3.81072	14.0327	3.70338	13.0265
Sox2_BIN_110	Sox2_BIN_001	34112879	34116879	34114879	4.86573	29.1561	3.91683	15.1037	3.81422	14.0667
Sox2_BIN_110	Sox2_BIN_002	34116879	34120879	34118879	4.88023	29.4506	3.81657	14.0897	3.77339	13.6743
Sox2_BIN_110	Sox2_BIN_003	34120879	34124879	34122879	5.04412	32.9938	3.55544	11.7569	3.78821	13.8155
Sox2_BIN_110	Sox2_BIN_004	34124879	34128879	34126879	5.76479	54.372	4.00091	16.01	3.68969	12.9035
Sox2_BIN_110	Sox2_BIN_005	34128879	34132879	34130879	6.1923	73.1256	4.16203	17.9017	4.02999	16.3361
Sox2_BIN_110	Sox2_BIN_006	34132879	34136879	34134879	5.87637	58.744	4.03952	16.4443	3.97486	15.7236
Sox2_BIN_110	Sox2_BIN_007	34136879	34140879	34138879	5.69357	51.7531	4.12549	17.454	3.9094	15.0261
Sox2_BIN_110	Sox2_BIN_008	34140879	34144879	34142879	4.95939	31.1117	4.11719	17.3539	3.64288	12.4916
Sox2_BIN_110	Sox2_BIN_009	34144879	34148879	34146879	4.93167	30.5198	4.01836	16.2049	3.58021	11.9605
Sox2_BIN_110	Sox2_BIN_010	34148879	34152879	34150879	4.78406	27.5515	4.05322	16.6012	3.57124	11.8864
Sox2_BIN_110	Sox2_BIN_011	34152879	34156879	34154879	4.73093	26.5553	3.99202	15.9118	3.53556	11.596
Sox2_BIN_110	Sox2_BIN_012	34156879	34160879	34158879	4.68967	25.8066	3.85499	14.47	3.70541	13.0449
Sox2_BIN_110	Sox2_BIN_013	34160879	34164879	34162879	5.02012	32.4494	3.95725	15.5328	3.40204	10.571
Sox2_BIN_110	Sox2_BIN_014	34164879	34168879	34166879	5.12334	34.8561	3.88951	14.8204	3.62806	12.3639
Sox2_BIN_110	Sox2_BIN_015	34168879	34172879	34170879	5.11057	34.549	4.2569	19.1185	3.73026	13.2715
Sox2_BIN_110	Sox2_BIN_016	34172879	34176879	34174879	5.41378	42.6294	4.14198	17.6547	3.75636	13.5138
Sox2_BIN_110	Sox2_BIN_017	34176879	34180879	34178879	5.55389	46.9772	4.27575	19.3699	3.78077	13.7444
Sox2_BIN_110	Sox2_BIN_018	34180879	34184879	34182879	5.60968	48.8295	4.08775	17.0034	3.75783	13.5275
Sox2_BIN_110	Sox2_BIN_019	34184879	34188879	34186879	6.14528	70.7803	4.11136	17.2839	3.35792	10.2526
Sox2_BIN_110	Sox2_BIN_020	34188879	34192879	34190879	5.91312	60.2596	3.99614	15.9573	3.60069	12.1315
Sox2_BIN_110	Sox2_BIN_021	34192879	34196879	34194879	5.91312	60.2596	3.99614	15.9573	3.60069	12.1315
Sox2_BIN_110	Sox2_BIN_022	34196879	34200879	34198879	5.7015	52.0383	4.06628	16.7522	3.57968	11.9561
Sox2_BIN_110	Sox2_BIN_023	34200879	34204879	34202879	5.50705	45.4766	4.17462	18.0587	3.92641	15.2043
Sox2_BIN_110	Sox2_BIN_024	34204879	34208879	34206879	5.64194	49.9335	4.19904	18.367	4.08967	17.026
Sox2_BIN_110	Sox2_BIN_025	34208879	34212879	34210879	5.65121	50.2557	4.21309	18.5468	4.09543	17.0941
Sox2_BIN_110	Sox2_BIN_026	34212879	34216879	34214879	5.68473	51.437	4.20457	18.4375	3.93156	15.2587
Sox2_BIN_110	Sox2_BIN_027	34216879	34220879	34218879	5.79246	55.4247	4.16992	17.9999	3.97467	15.7215
Sox2_BIN_110	Sox2_BIN_028	34220879	34224879	34222879	5.94665	61.6764	4.33362	20.1628	4.19143	18.2703
Sox2_BIN_110	Sox2_BIN_029	34224879	34228879	34226879	5.94665	61.6764	4.33362	20.1628	4.19143	18.2703
Sox2_BIN_110	Sox2_BIN_030	34228879	34232879	34230879	5.12289	34.8453	3.96354	15.6007	3.99966	15.9963
Sox2_BIN_110	Sox2_BIN_031	34232879	34236879	34234879	4.91412	30.1506	3.90146	14.9436	4.21673	18.5936
Sox2_BIN_110	Sox2_BIN_032	34236879	34240879	34238879	4.71796	26.3177	4.12084	17.3979	4.28347	19.4738
Sox2_BIN_110	Sox2_BIN_033	34240879	34244879	34242879	4.75462	26.995	3.87891	14.7119	4.40289	21.1544
Sox2_BIN_110	Sox2_BIN_034	34244879	34248879	34246879	5.17393	36.1	3.84627	14.3828	4.73324	26.5978
Sox2_BIN_110	Sox2_BIN_035	34248879	34252879	34250879	5.38595	41.815	3.98315	15.8142	4.81994	28.2453
Sox2_BIN_110	Sox2_BIN_036	34252879	34256879	34254879	5.38595	41.815	3.98315	15.8142	4.81994	28.2453
Sox2_BIN_110	Sox2_BIN_037	34256879	34260879	34258879	5.62666	49.4075	3.58215	11.9766	4.88965	29.6436
Sox2_BIN_110	Sox2_BIN_038	34260879	34264879	34262879	5.62666	49.4075	3.58215	11.9766	4.88965	29.6436
Sox2_BIN_110	Sox2_BIN_039	34264879	34268879	34266879	6.07657	67.4885	3.88795	14.8044	4.94287	30.7575
Sox2_BIN_110	Sox2_BIN_040	34268879	34272879	34270879	5.79461	55.5076	4.22077	18.6456	4.24769	18.9969
Sox2_BIN_110	Sox2_BIN_041	34272879	34276879	34274879	5.76094	54.227	4.08036	16.9165	3.95554	15.5145
Sox2_BIN_110	Sox2_BIN_042	34276879	34280879	34278879	5.76094	54.227	4.08036	16.9165	3.95554	15.5145
Sox2_BIN_110	Sox2_BIN_043	34280879	34284879	34282879	5.39216	41.9953	4.04004	16.4503	3.97344	15.7081
Sox2_BIN_110	Sox2_BIN_044	34284879	34288879	34286879	5.29895	39.3679	3.96544	15.6213	3.74931	13.4479
Sox2_BIN_110	Sox2_BIN_045	34288879	34292879	34290879	5.19231	36.5629	3.96509	15.6175	3.87155	14.637
Sox2_BIN_110	Sox2_BIN_046	34292879	34296879	34294879	5.39943	42.2076	4.11222	17.2942	4.06436	16.7299
Sox2_BIN_110	Sox2_BIN_047	34296879	34300879	34298879	5.72875	53.0304	4.90252	29.9092	4.30695	19.7934
Sox2_BIN_110	Sox2_BIN_048	34300879	34304879	34302879	6.11307	69.2177	4.50189	22.657	4.38159	20.8444
Sox2_BIN_110	Sox2_BIN_049	34304879	34308879	34306879	6.16369	71.6893	4.45843	21.9847	4.38644	20.9146
Sox2_BIN_110	Sox2_BIN_050	34308879	34312879	34310879	6.13255	70.1589	4.39547	21.046	4.26227	19.1898
Sox2_BIN_110	Sox2_BIN_051	34312879	34316879	34314879	6.10871	69.009	4.31915	19.9616	4.11894	17.375
Sox2_BIN_110	Sox2_BIN_052	34316879	34320879	34318879	6.01615	64.7205	4.13716	17.5959	4.42587	21.4941
Sox2_BIN_110	Sox2_BIN_053	34320879	34324879	34322879	6.09838	68.5164	4.80477	27.9498	4.97212	31.3876
Sox2_BIN_110	Sox2_BIN_054	34324879	34328879	34326879	6.20738	73.8935	5.05023	33.1337	5.29354	39.2206
Sox2_BIN_110	Sox2_BIN_055	34328879	34332879	34330879	6.35372	81.7826	5.26073	38.3386	5.07249	33.6489
Sox2_BIN_110	Sox2_BIN_056	34332879	34336879	34334879	6.56771	94.859	5.15621	35.6594	4.98802	31.7355
Sox2_BIN_110	Sox2_BIN_057	34336879	34340879	34338879	6.96937	125.311	5.33643	40.4041	4.83688	28.5789
Sox2_BIN_110	Sox2_BIN_058	34340879	34344879	34342879	6.96937	125.311	5.33643	40.4041	4.83688	28.5789
Sox2_BIN_110	Sox2_BIN_059	34344879	34348879	34346879	6.96274	124.737	5.10734	34.4716	4.49967	22.6223
Sox2_BIN_110	Sox2_BIN_060	34348879	34352879	34350879	6.94704	123.386	5.00222	32.0492	4.57055	23.7615
Sox2_BIN_110	Sox2_BIN_061	34352879	34356879	34354879	6.15621	71.3185	4.57784	23.8817	4.46207	22.0403
Sox2_BIN_110	Sox2_BIN_062	34356879	34360879	34358879	6.26279	76.7869	4.73246	26.5836	4.72744	26.4912
Sox2_BIN_110	Sox2_BIN_063	34360879	34364879	34362879	6.33836	80.9162	4.84111	28.6628	4.92041	30.2825
Sox2_BIN_110	Sox2_BIN_064	34364879	34368879	34366879	6.22508	74.806	4.90741	30.0108	5.00964	32.2144
Sox2_BIN_110	Sox2_BIN_065	34368879	34372879	34370879	5.84894	57.6375	4.83413	28.5245	4.96899	31.3196
Sox2_BIN_110	Sox2_BIN_066	34372879	34376879	34374879	5.75357	53.9506	4.88113	29.4691	4.91188	30.1039
Sox2_BIN_110	Sox2_BIN_067	34376879	34380879	34378879	5.3572	40.9901	4.90943	30.0528	4.74173	26.7549
Sox2_BIN_110	Sox2_BIN_068	34380879	34384879	34382879	5.36344	41.1677	4.80205	27.8972	4.70393	26.063
Sox2_BIN_110	Sox2_BIN_069	34384879	34388879	34386879	5.11063	34.5504	4.62456	24.6678	4.12848	17.4902
Sox2_BIN_110	Sox2_BIN_070	34388879	34392879	34390879	5.49354	45.0526	4.92483	30.3755	4.33681	20.2074
Sox2_BIN_110	Sox2_BIN_071	34392879	34396879	34394879	5.55346	46.9631	4.76768	27.2405	4.0446	16.5024
Sox2_BIN_110	Sox2_BIN_072	34396879	34400879	34398879	5.36083	41.0932	4.8395	28.6308	4.14017	17.6325			chr3:34,479,496-34,725,095
Sox2_BIN_110	Sox2_BIN_073	34400879	34404879	34402879	5.58614	48.0393	4.96567	31.2475	3.92792	15.2203
Sox2_BIN_110	Sox2_BIN_074	34404879	34408879	34406879	5.85176	57.7504	5.09052	34.0722	4.72726	26.4878
Sox2_BIN_110	Sox2_BIN_075	34408879	34412879	34410879	5.66675	50.7996	5.15346	35.5914	4.83643	28.57
Sox2_BIN_110	Sox2_BIN_076	34412879	34416879	34414879	5.73403	53.2248	5.12378	34.8668	4.85062	28.8524
Sox2_BIN_110	Sox2_BIN_077	34416879	34420879	34418879	5.73403	53.2248	5.12378	34.8668	4.85062	28.8524
Sox2_BIN_110	Sox2_BIN_078	34420879	34424879	34422879	5.3724	41.4242	4.7337	26.6065	4.93593	30.61
Sox2_BIN_110	Sox2_BIN_079	34424879	34428879	34426879	5.30373	39.4986	4.82541	28.3527	4.8913	29.6776
Sox2_BIN_110	Sox2_BIN_080	34428879	34432879	34430879	5.24271	37.8629	4.75049	26.9179	5.05462	33.2348
Sox2_BIN_110	Sox2_BIN_081	34432879	34436879	34434879	5.25096	38.08	4.80232	27.9025	4.883	29.5073
Sox2_BIN_110	Sox2_BIN_082	34436879	34440879	34438879	5.36624	41.2478	5.00492	32.1093	4.71306	26.2284
Sox2_BIN_110	Sox2_BIN_083	34440879	34444879	34442879	5.44328	43.5102	5.02149	32.4801	4.91779	30.2276
Sox2_BIN_110	Sox2_BIN_084	34444879	34448879	34446879	5.59296	48.267	5.10801	34.4877	4.74664	26.846
Sox2_BIN_110	Sox2_BIN_085	34448879	34452879	34450879	6.56552	94.7147	4.9976	31.9468	5.09864	34.2645
Sox2_BIN_110	Sox2_BIN_086	34452879	34456879	34454879	6.67678	102.309	4.94973	30.9042	5.16904	35.9779
Sox2_BIN_110	Sox2_BIN_087	34456879	34460879	34458879	6.73362	106.42	4.92179	30.3115	5.48309	44.7275
Sox2_BIN_110	Sox2_BIN_088	34460879	34464879	34462879	6.61442	97.98	5.03851	32.8657	5.45678	43.9192
Sox2_BIN_110	Sox2_BIN_089	34464879	34468879	34466879	6.24348	75.7662	5.26233	38.3813	5.27574	38.7397
Sox2_BIN_110	Sox2_BIN_090	34468879	34472879	34470879	5.94245	61.4972	5.3078	39.6102	5.20429	36.8677
Sox2_BIN_110	Sox2_BIN_091	34472879	34476879	34474879	5.96398	62.422	5.28974	39.1175	5.23751	37.7267
Sox2_BIN_110	Sox2_BIN_092	34476879	34480879	34478879	5.83108	56.9283	5.36423	41.1903	5.1982	36.7124
Sox2_BIN_110	Sox2_BIN_093	34480879	34484879	34482879	6.1331	70.1856	5.33287	40.3044	5.24299	37.8702
Sox2_BIN_110	Sox2_BIN_094	34484879	34488879	34486879	6.15034	71.0293	5.28365	38.9526	5.37239	41.424
Sox2_BIN_110	Sox2_BIN_095	34488879	34492879	34490879	6.15034	71.0293	5.28365	38.9526	5.37239	41.424
Sox2_BIN_110	Sox2_BIN_096	34492879	34496879	34494879	5.95909	62.2108	5.56591	47.3703	5.63946	49.8478
Sox2_BIN_110	Sox2_BIN_097	34496879	34500879	34498879	5.89114	59.3486	5.68725	51.5267	5.86598	58.3226
Sox2_BIN_110	Sox2_BIN_098	34500879	34504879	34502879	5.53877	46.4876	6.01419	64.6328	6.13456	70.2563
Sox2_BIN_110	Sox2_BIN_099	34504879	34508879	34506879	5.53877	46.4876	6.01419	64.6328	6.13456	70.2563
Sox2_BIN_110	Sox2_BIN_100	34508879	34512879	34510879	5.63789	49.7936	5.72603	52.9307	5.94244	61.4967
Sox2_BIN_110	Sox2_BIN_101	34512879	34516879	34514879	5.58071	47.8586	5.70642	52.2161	6.12415	69.7512
Sox2_BIN_110	Sox2_BIN_102	34516879	34520879	34518879	5.74949	53.7983	5.69501	51.8047	6.14101	70.5715
Sox2_BIN_110	Sox2_BIN_103	34520879	34524879	34522879	5.80854	56.046	5.88217	58.9807	6.05461	66.4689
Sox2_BIN_110	Sox2_BIN_104	34524879	34528879	34526879	6.06902	67.1364	5.9065	59.9838	6.29252	78.3859
Sox2_BIN_110	Sox2_BIN_105	34528879	34532879	34530879	6.22267	74.6813	6.14938	70.982	6.34777	81.4457
Sox2_BIN_110	Sox2_BIN_106	34532879	34536879	34534879	6.94844	123.506	6.68541	102.922	6.75025	107.654
Sox2_BIN_110	Sox2_BIN_107	34536879	34540879	34538879	7.6645	202.882	7.24559	151.754	7.28381	155.828
Sox2_BIN_110	Sox2_BIN_108	34540879	34544879	34542879	8.27162	309.033	7.56816	189.777	7.70157	208.164
Sox2_BIN_110	Sox2_BIN_109	34544879	34548879	34546879	8.80975	448.743	8.21652	297.452	8.18408	290.84
Sox2_BIN_110	Sox2_BIN_110	34548879	34552879	34550879	8.40258	338.399	8.10185	274.726	7.462	176.314
Sox2_BIN_110	Sox2_BIN_111	34552879	34556879	34554879	8.61965	393.346	8.40807	339.689	7.78774	220.975
Sox2_BIN_110	Sox2_BIN_112	34556879	34560879	34558879	8.50856	364.193	8.36296	329.232	7.72176	211.097
Sox2_BIN_110	Sox2_BIN_113	34560879	34564879	34562879	8.26043	306.647	8.16419	286.857	7.7582	216.496
Sox2_BIN_110	Sox2_BIN_114	34564879	34568879	34566879	7.81007	224.422	8.04775	264.616	7.77388	218.863
Sox2_BIN_110	Sox2_BIN_115	34568879	34572879	34570879	7.81488	225.172	8.08606	271.735	7.94088	245.722
Sox2_BIN_110	Sox2_BIN_116	34572879	34576879	34574879	7.52	183.546	7.82835	227.284	7.63795	199.183
Sox2_BIN_110	Sox2_BIN_117	34576879	34580879	34578879	7.22425	149.526	7.69373	207.034	7.53169	185.039
Sox2_BIN_110	Sox2_BIN_118	34580879	34584879	34582879	7.16706	143.714	7.5294	184.746	7.39761	168.617
Sox2_BIN_110	Sox2_BIN_119	34584879	34588879	34586879	7.21753	148.831	7.24988	152.205	7.21091	148.15
Sox2_BIN_110	Sox2_BIN_120	34588879	34592879	34590879	6.76628	108.856	7.19566	146.592	7.44925	174.762
Sox2_BIN_110	Sox2_BIN_121	34592879	34596879	34594879	6.58171	95.7836	6.97043	125.403	7.22845	149.962
Sox2_BIN_110	Sox2_BIN_122	34596879	34600879	34598879	6.284	77.9244	6.74939	107.589	7.12844	139.918
Sox2_BIN_110	Sox2_BIN_123	34600879	34604879	34602879	6.27037	77.1914	6.85481	115.745	7.12853	139.927
Sox2_BIN_110	Sox2_BIN_124	34604879	34608879	34606879	6.13793	70.4208	6.51471	91.4373	6.78416	110.214
Sox2_BIN_110	Sox2_BIN_125	34608879	34612879	34610879	5.99641	63.841	6.34799	81.4582	6.4643	88.2974
Sox2_BIN_110	Sox2_BIN_126	34612879	34616879	34614879	5.99641	63.841	6.34799	81.4582	6.4643	88.2974
Sox2_BIN_110	Sox2_BIN_127	34616879	34620879	34618879	6.07161	67.257	6.18793	72.9042	6.45178	87.5343
Sox2_BIN_110	Sox2_BIN_128	34620879	34624879	34622879	5.98175	63.1955	6.46237	88.1794	6.9499	123.631
Sox2_BIN_110	Sox2_BIN_129	34624879	34628879	34626879	5.98175	63.1955	6.46237	88.1794	6.9499	123.631
Sox2_BIN_110	Sox2_BIN_130	34628879	34632879	34630879	5.98175	63.1955	6.46237	88.1794	6.9499	123.631
Sox2_BIN_110	Sox2_BIN_131	34632879	34636879	34634879	5.98175	63.1955	6.46237	88.1794	6.9499	123.631
Sox2_BIN_110	Sox2_BIN_132	34636879	34640879	34638879	6.06935	67.1514	7.50752	181.965	7.70062	208.026
Sox2_BIN_110	Sox2_BIN_133	34640879	34644879	34642879	6.46925	88.6009	7.62339	197.183	7.74408	214.388
Sox2_BIN_110	Sox2_BIN_134	34644879	34648879	34646879	6.23298	75.2165	7.59906	193.886	7.71917	210.718
Sox2_BIN_110	Sox2_BIN_135	34648879	34652879	34650879	6.23298	75.2165	7.59906	193.886	7.71917	210.718
Sox2_BIN_110	Sox2_BIN_136	34652879	34656879	34654879	6.47577	89.0025	7.58917	192.561	7.64336	199.932
Sox2_BIN_110	Sox2_BIN_137	34656879	34660879	34658879	6.19813	73.4217	7.31084	158.775	7.43072	172.533
Sox2_BIN_110	Sox2_BIN_138	34660879	34664879	34662879	5.7963	55.5724	7.09413	136.63	7.26539	153.851
Sox2_BIN_110	Sox2_BIN_139	34664879	34668879	34666879	5.82816	56.8135	6.66597	101.544	7.35401	163.597
Sox2_BIN_110	Sox2_BIN_140	34668879	34672879	34670879	5.78641	55.1927	6.53624	92.8119	7.15356	142.376
Sox2_BIN_110	Sox2_BIN_141	34672879	34676879	34674879	5.80914	56.0692	6.25706	76.4825	7.05588	133.055
Sox2_BIN_110	Sox2_BIN_142	34676879	34680879	34678879	5.80914	56.0692	6.25706	76.4825	7.05588	133.055
Sox2_BIN_110	Sox2_BIN_143	34680879	34684879	34682879	5.89593	59.5458	6.0776	67.5366	6.84506	114.966
Sox2_BIN_110	Sox2_BIN_144	34684879	34688879	34686879	5.77503	54.7591	6.49331	90.0912	6.6109	97.7417
Sox2_BIN_110	Sox2_BIN_145	34688879	34692879	34690879	5.80126	55.7638	6.28472	77.9633	6.55663	94.1331
Sox2_BIN_110	Sox2_BIN_146	34692879	34696879	34694879	5.68064	51.2914	5.91858	60.4881	6.16114	71.5628
Sox2_BIN_110	Sox2_BIN_147	34696879	34700879	34698879	5.68064	51.2914	5.91858	60.4881	6.16114	71.5628
Sox2_BIN_110	Sox2_BIN_148	34700879	34704879	34702879	5.32175	39.995	5.41621	42.7013	5.40321	42.3182
Sox2_BIN_110	Sox2_BIN_149	34704879	34708879	34706879	5.31656	39.8515	5.23828	37.7467	5.40077	42.2469
Sox2_BIN_110	Sox2_BIN_150	34708879	34712879	34710879	5.36705	41.2709	5.51203	45.6339	5.41044	42.531
Sox2_BIN_110	Sox2_BIN_151	34712879	34716879	34714879	5.36555	41.2279	5.4353	43.27	5.50105	45.2876
Sox2_BIN_110	Sox2_BIN_152	34716879	34720879	34718879	5.34417	40.6214	5.47951	44.6167	5.56051	47.1934
Sox2_BIN_110	Sox2_BIN_153	34720879	34724879	34722879	5.42104	42.8445	5.64553	50.0581	5.84863	57.6251
Sox2_BIN_110	Sox2_BIN_154	34724879	34728879	34726879	5.25141	38.0919	5.50642	45.4566	6.16161	71.5861
Sox2_BIN_110	Sox2_BIN_155	34728879	34732879	34730879	5.06963	33.5823	5.54286	46.6194	5.67088	50.9454
Sox2_BIN_110	Sox2_BIN_156	34732879	34736879	34734879	5.1125	34.5951	5.7562	54.0491	5.6592	50.5348
Sox2_BIN_110	Sox2_BIN_157	34736879	34740879	34738879	5.1125	34.5951	5.7562	54.0491	5.6592	50.5348
Sox2_BIN_110	Sox2_BIN_158	34740879	34744879	34742879	5.1125	34.5951	5.7562	54.0491	5.6592	50.5348
Sox2_BIN_110	Sox2_BIN_159	34744879	34748879	34746879	5.13956	35.2501	5.63032	49.5332	5.35351	40.8852
Sox2_BIN_110	Sox2_BIN_160	34748879	34752879	34750879	5.2787	38.8194	5.61606	49.0457	5.20943	36.9994
Sox2_BIN_110	Sox2_BIN_161	34752879	34756879	34754879	5.2787	38.8194	5.61606	49.0457	5.20943	36.9994
Sox2_BIN_110	Sox2_BIN_162	34756879	34760879	34758879	5.39359	42.0371	5.36723	41.2761	5.27578	38.7408
Sox2_BIN_110	Sox2_BIN_163	34760879	34764879	34762879	5.11699	34.7031	5.32003	39.9475	5.11399	34.6311
Sox2_BIN_110	Sox2_BIN_164	34764879	34768879	34766879	4.88537	29.5558	5.24495	37.9216	5.23219	37.5877
Sox2_BIN_110	Sox2_BIN_165	34768879	34772879	34770879	4.9075	30.0127	5.20359	36.8498	5.21445	37.1285
Sox2_BIN_110	Sox2_BIN_166	34772879	34776879	34774879	4.55047	23.433	5.24244	37.8557	5.24208	37.8462
Sox2_BIN_110	Sox2_BIN_167	34776879	34780879	34778879	4.4307	21.5663	5.35913	41.045	5.42982	43.106
Sox2_BIN_110	Sox2_BIN_168	34780879	34784879	34782879	4.58435	23.9898	5.08257	33.8848	5.39163	41.9799
Sox2_BIN_110	Sox2_BIN_169	34784879	34788879	34786879	4.6601	25.2831	5.0623	33.4122	5.49318	45.0414
Sox2_BIN_110	Sox2_BIN_170	34788879	34792879	34790879	4.93891	30.6733	4.92519	30.383	5.97611	62.9488
Sox2_BIN_110	Sox2_BIN_171	34792879	34796879	34794879	4.93891	30.6733	4.92519	30.383	5.97611	62.9488
Sox2_BIN_110	Sox2_BIN_172	34796879	34800879	34798879	5.22829	37.4862	4.91035	30.072	6.25484	76.3652
Sox2_BIN_110	Sox2_BIN_173	34800879	34804879	34802879	5.22829	37.4862	4.91035	30.072	6.25484	76.3652
Sox2_BIN_110	Sox2_BIN_174	34804879	34808879	34806879	5.22829	37.4862	4.91035	30.072	6.25484	76.3652
Sox2_BIN_110	Sox2_BIN_175	34808879	34812879	34810879	5.69388	51.764	3.90557	14.9862	5.84469	57.4683
Sox2_BIN_110	Sox2_BIN_176	34812879	34816879	34814879	5.55446	46.9958	4.2849	19.4933	5.56692	47.4035
Sox2_BIN_110	Sox2_BIN_177	34816879	34820879	34818879	5.55446	46.9958	4.2849	19.4933	5.56692	47.4035
Sox2_BIN_110	Sox2_BIN_178	34820879	34824879	34822879	5.32108	39.9765	4.42062	21.416	5.25493	38.1849
Sox2_BIN_110	Sox2_BIN_179	34824879	34828879	34826879	4.95692	31.0587	4.63202	24.7957	4.87206	29.2844
Sox2_BIN_110	Sox2_BIN_180	34828879	34832879	34830879	4.89468	29.7471	4.48171	22.3424	4.87196	29.2823
Sox2_BIN_110	Sox2_BIN_181	34832879	34836879	34834879	4.89468	29.7471	4.48171	22.3424	4.87196	29.2823
Sox2_BIN_110	Sox2_BIN_182	34836879	34840879	34838879	4.85373	28.9147	4.39162	20.9899	4.80848	28.0219
Sox2_BIN_110	Sox2_BIN_183	34840879	34844879	34842879	5.56287	47.2707	4.67285	25.5074	4.98975	31.7735
Sox2_BIN_110	Sox2_BIN_184	34844879	34848879	34846879	5.6487	50.1681	4.84381	28.7166	4.62243	24.6315
Sox2_BIN_110	Sox2_BIN_185	34848879	34852879	34850879	5.6487	50.1681	4.84381	28.7166	4.62243	24.6315
Sox2_BIN_110	Sox2_BIN_186	34852879	34856879	34854879	5.6487	50.1681	4.84381	28.7166	4.62243	24.6315
Sox2_BIN_110	Sox2_BIN_187	34856879	34860879	34858879	5.31696	39.8625	4.78883	27.6427	4.57489	23.833
Sox2_BIN_110	Sox2_BIN_188	34860879	34864879	34862879	4.8647	29.1354	4.60842	24.3935	3.86974	14.6187
Sox2_BIN_110	Sox2_BIN_189	34864879	34868879	34866879	4.86491	29.1396	4.72008	26.3564	4.12593	17.4594
Sox2_BIN_110	Sox2_BIN_190	34868879	34872879	34870879	4.96406	31.2127	4.79252	27.7135	4.20428	18.4338
Sox2_BIN_110	Sox2_BIN_191	34872879	34876879	34874879	4.8768	29.3808	4.88285	29.5042	4.30418	19.7555
Sox2_BIN_110	Sox2_BIN_192	34876879	34880879	34878879	4.77935	27.4617	4.82555	28.3553	4.80092	27.8754
Sox2_BIN_110	Sox2_BIN_193	34880879	34884879	34882879	5.36473	41.2046	5.3217	39.9936	5.05575	33.2609
Sox2_BIN_110	Sox2_BIN_194	34884879	34888879	34886879	4.09263	17.061	5.0634	33.4377	5.32867	40.1873
Sox2_BIN_110	Sox2_BIN_195	34888879	34892879	34890879	4.50233	22.6639	4.82918	28.4267	5.13366	35.1064
Sox2_BIN_110	Sox2_BIN_196	34892879	34896879	34894879	4.6406	24.9436	4.75699	27.0393	4.7031	26.048
Sox2_BIN_110	Sox2_BIN_197	34896879	34900879	34898879	4.6406	24.9436	4.75699	27.0393	4.7031	26.048
Sox2_BIN_110	Sox2_BIN_198	34900879	34904879	34902879	4.54735	23.3824	4.70389	26.0623	4.59503	24.1681
Sox2_BIN_110	Sox2_BIN_199	34904879	34908879	34906879	4.85135	28.867	4.63913	24.9183	4.4625	22.0468
Sox2_BIN_110	Sox2_BIN_200	34908879	34912879	34910879	5.05945	33.3461	5.0699	33.5886	5.20819	36.9675
Sox2_BIN_110	Sox2_BIN_201	34912879	34916879	34914879	5.54463	46.6768	4.94211	30.7413	5.20162	36.7996
Sox2_BIN_110	Sox2_BIN_202	34916879	34920879	34918879	5.75257	53.9133	4.88734	29.5962	5.1988	36.7279
Sox2_BIN_110	Sox2_BIN_203	34920879	34924879	34922879	5.25226	38.1144	5.04433	32.9985	5.41037	42.5289
Sox2_BIN_110	Sox2_BIN_204	34924879	34928879	34926879	5.18595	36.4021	5.01151	32.2562	5.33902	40.4767
Sox2_BIN_110	Sox2_BIN_205	34928879	34932879	34930879	4.74561	26.8269	4.91404	30.1489	5.40136	42.264
Sox2_BIN_110	Sox2_BIN_206	34932879	34936879	34934879	4.74561	26.8269	4.91404	30.1489	5.40136	42.264
Sox2_BIN_110	Sox2_BIN_207	34936879	34940879	34938879	4.68675	25.7544	4.36425	20.5955	4.80745	28.0019
Sox2_BIN_110	Sox2_BIN_208	34940879	34944879	34942879	5.18219	36.3073	4.4012	21.1297	4.78887	27.6435
Sox2_BIN_110	Sox2_BIN_209	34944879	34948879	34946879	5.1915	36.5424	4.30387	19.7513	5.00519	32.1153
Sox2_BIN_110	Sox2_BIN_210	34948879	34952879	34950879	5.1915	36.5424	4.30387	19.7513	5.00519	32.1153
Sox2_BIN_110	Sox2_BIN_211	34952879	34956879	34954879	5.22304	37.3502	4.35316	20.4377	4.85204	28.8809
Sox2_BIN_110	Sox2_BIN_212	34956879	34960879	34958879	5.0097	32.2159	4.51504	22.8646	4.92316	30.3402
Sox2_BIN_110	Sox2_BIN_213	34960879	34964879	34962879	5.27821	38.806	4.80097	27.8764	4.75119	26.9309
Sox2_BIN_110	Sox2_BIN_214	34964879	34968879	34966879	5.27821	38.806	4.80097	27.8764	4.75119	26.9309
Sox2_BIN_110	Sox2_BIN_215	34968879	34972879	34970879	5.008	32.178	4.92545	30.3885	4.37971	20.8173
Sox2_BIN_110	Sox2_BIN_216	34972879	34976879	34974879	5.16085	35.7743	5.04019	32.904	4.64094	24.9495
Sox2_BIN_110	Sox2_BIN_217	34976879	34980879	34978879	5.52014	45.8912	5.29965	39.3871	4.81167	28.084
Sox2_BIN_110	Sox2_BIN_218	34980879	34984879	34982879	5.54654	46.7385	5.25887	38.2894	4.95453	31.0071
Sox2_BIN_110	Sox2_BIN_219	34984879	34988879	34986879	5.78476	55.1297	5.37891	41.6115	5.10225	34.3502
Sox2_BIN_110	Sox2_BIN_220	34988879	34992879	34990879	6.04022	65.8094	5.42159	42.8608	5.30494	39.5319
Sox2_BIN_110	Sox2_BIN_221	34992879	34996879	34994879	6.48205	89.3903	5.47058	44.3413	5.46673	44.2232
Sox2_BIN_110	Sox2_BIN_222	34996879	35000879	34998879	6.48369	89.4924	5.31051	39.6846	5.35751	40.9989
Sox2_BIN_110	Sox2_BIN_223	35000879	35004879	35002879	6.2757	77.477	5.25769	38.2581	5.14802	35.4574
Sox2_BIN_110	Sox2_BIN_224	35004879	35008879	35006879	6.20895	73.9742	5.21356	37.1055	5.14471	35.3763
Sox2_BIN_110	Sox2_BIN_225	35008879	35012879	35010879	5.88779	59.2111	4.95182	30.9489	4.84449	28.7302
Sox2_BIN_110	Sox2_BIN_226	35012879	35016879	35014879	5.88779	59.2111	4.95182	30.9489	4.84449	28.7302
Sox2_BIN_110	Sox2_BIN_227	35016879	35020879	35018879	nan		nan		nan
Sox2_BIN_110	Sox2_BIN_228	35020879	35024879	35022879	4.55644	23.5302	4.22648	18.7196	5.32548	40.0985
Sox2_BIN_110	Sox2_BIN_229	35024879	35028879	35026879	5.37952	41.6291	4.42741	21.5171	5.1796	36.2422
Sox2_BIN_110	Sox2_BIN_230	35028879	35032879	35030879	5.37952	41.6291	4.42741	21.5171	5.1796	36.2422
Sox2_BIN_110	Sox2_BIN_231	35032879	35036879	35034879	5.55004	46.852	4.81126	28.0759	4.79204	27.7044
Sox2_BIN_110	Sox2_BIN_232	35036879	35040879	35038879	5.86061	58.1059	4.89912	29.8388	4.82107	28.2675
Sox2_BIN_110	Sox2_BIN_233	35040879	35044879	35042879	6.1898	72.9986	5.0121	32.2694	4.78455	27.5608
Sox2_BIN_110	Sox2_BIN_234	35044879	35048879	35046879	6.18782	72.8987	5.03533	32.7933	4.90246	29.908
Sox2_BIN_110	Sox2_BIN_235	35048879	35052879	35050879	5.86284	58.1956	4.87261	29.2956	4.81683	28.1846
Sox2_BIN_110	Sox2_BIN_236	35052879	35056879	35054879	5.76096	54.2279	4.67922	25.6204	4.91965	30.2665
Sox2_BIN_110	Sox2_BIN_237	35056879	35060879	35058879	5.63682	49.7566	4.66335	25.3401	4.9716	31.3763
Sox2_BIN_110	Sox2_BIN_238	35060879	35064879	35062879	5.32087	39.9707	4.53435	23.1727	4.96987	31.3387
Sox2_BIN_110	Sox2_BIN_239	35064879	35068879	35066879	4.79398	27.7417	4.50111	22.6449	4.64385	24.9999
Sox2_BIN_110	Sox2_BIN_240	35068879	35072879	35070879	4.68906	25.7957	4.45116	21.8743	4.81052	28.0615
Sox2_BIN_110	Sox2_BIN_241	35072879	35076879	35074879	4.68906	25.7957	4.45116	21.8743	4.81052	28.0615
Sox2_BIN_110	Sox2_BIN_242	35076879	35080879	35078879	4.6187	24.5678	4.42197	21.4361	4.64787	25.0697
Sox2_BIN_110	Sox2_BIN_243	35080879	35084879	35082879	4.58611	24.0191	4.36338	20.583	4.79597	27.78
Sox2_BIN_110	Sox2_BIN_244	35084879	35088879	35086879	4.65843	25.2539	4.4786	22.2942	4.34448	20.315
Sox2_BIN_110	Sox2_BIN_245	35088879	35092879	35090879	4.54297	23.3114	4.38175	20.8467	4.20266	18.4131
Sox2_BIN_110	Sox2_BIN_246	35092879	35096879	35094879	4.59617	24.1872	4.31816	19.9478	4.06826	16.7752
Sox2_BIN_110	Sox2_BIN_247	35096879	35100879	35098879	4.74267	26.7723	4.14342	17.6723	3.96703	15.6385
Sox2_BIN_110	Sox2_BIN_248	35100879	35104879	35102879	4.79397	27.7415	4.04364	16.4913	3.99938	15.9931
