# Supplementary material for: YY1 and CTCF orchestrate a 3D chromatin looping switch during early neural lineage commitment
Source: HighWire-hosted journal article supplement (doi:10.1101/gr.215160.116), 2017-05-23
Supplement: Supplemental_Table_S5.xlsx [file Supplemental_Table_S5.xlsx]

## Sheet: ES-2i-CTCF-IP-Blobel-Rep2-S1_S9
Beagan et al. 2017
Table S5, Significant CTCF Peaks in ES cells in 2i Conditions
#chr	start	end	name	score	signalValue	pValue	qValue	peak
chr1	3002708	3002871	Project004-IPSHOCH-Exp5-ChIP-ES-2i-CTCF-IP-Blobel-Rep2-S1_S9_MACS2_rendition_1E-8_downsampled_try3_peak_1	170	9.50311	17.0487	14.6428	49
chr1	4132662	4132954	Project004-IPSHOCH-Exp5-ChIP-ES-2i-CTCF-IP-Blobel-Rep2-S1_S9_MACS2_rendition_1E-8_downsampled_try3_peak_2	631	24.4609	63.143	60.1038	144
chr1	4163475	4163685	Project004-IPSHOCH-Exp5-ChIP-ES-2i-CTCF-IP-Blobel-Rep2-S1_S9_MACS2_rendition_1E-8_downsampled_try3_peak_3	239	12.1429	23.9023	21.3845	65
chr1	4218330	4218547	Project004-IPSHOCH-Exp5-ChIP-ES-2i-CTCF-IP-Blobel-Rep2-S1_S9_MACS2_rendition_1E-8_downsampled_try3_peak_4	357	16.3665	35.7978	33.1142	103
chr1	4322616	4322910	Project004-IPSHOCH-Exp5-ChIP-ES-2i-CTCF-IP-Blobel-Rep2-S1_S9_MACS2_rendition_1E-8_downsampled_try3_peak_5	436	19.0062	43.698	40.9081	146
chr1	4336243	4336641	Project004-IPSHOCH-Exp5-ChIP-ES-2i-CTCF-IP-Blobel-Rep2-S1_S9_MACS2_rendition_1E-8_downsampled_try3_peak_6	709	23.9189	70.9547	67.8104	234
chr1	4372961	4373224	Project004-IPSHOCH-Exp5-ChIP-ES-2i-CTCF-IP-Blobel-Rep2-S1_S9_MACS2_rendition_1E-8_downsampled_try3_peak_7	404	17.9503	40.4998	37.7504	128
chr1	4406799	4407149	Project004-IPSHOCH-Exp5-ChIP-ES-2i-CTCF-IP-Blobel-Rep2-S1_S9_MACS2_rendition_1E-8_downsampled_try3_peak_8	1220	36.0811	122.044	118.149	190
chr1	4482037	4482366	Project004-IPSHOCH-Exp5-ChIP-ES-2i-CTCF-IP-Blobel-Rep2-S1_S9_MACS2_rendition_1E-8_downsampled_try3_peak_9	413	13.9348	41.3566	38.6017	173
chr1	4506639	4506962	Project004-IPSHOCH-Exp5-ChIP-ES-2i-CTCF-IP-Blobel-Rep2-S1_S9_MACS2_rendition_1E-8_downsampled_try3_peak_10	538	15	53.8199	50.8997	200
chr1	4758433	4758805	Project004-IPSHOCH-Exp5-ChIP-ES-2i-CTCF-IP-Blobel-Rep2-S1_S9_MACS2_rendition_1E-8_downsampled_try3_peak_11	1522	47.064	152.209	147.849	208
chr1	4759968	4760428	Project004-IPSHOCH-Exp5-ChIP-ES-2i-CTCF-IP-Blobel-Rep2-S1_S9_MACS2_rendition_1E-8_downsampled_try3_peak_12	1040	31.2435	104.062	100.445	160
chr1	4770168	4770529	Project004-IPSHOCH-Exp5-ChIP-ES-2i-CTCF-IP-Blobel-Rep2-S1_S9_MACS2_rendition_1E-8_downsampled_try3_peak_13	741	24.7297	74.1858	70.9967	193
chr1	4845792	4845982	Project004-IPSHOCH-Exp5-ChIP-ES-2i-CTCF-IP-Blobel-Rep2-S1_S9_MACS2_rendition_1E-8_downsampled_try3_peak_14	217	9.58498	21.795	19.3099	109
chr1	4856095	4856457	Project004-IPSHOCH-Exp5-ChIP-ES-2i-CTCF-IP-Blobel-Rep2-S1_S9_MACS2_rendition_1E-8_downsampled_try3_peak_15	208	10.3318	20.8859	18.4162	184
chr1	4904561	4904713	Project004-IPSHOCH-Exp5-ChIP-ES-2i-CTCF-IP-Blobel-Rep2-S1_S9_MACS2_rendition_1E-8_downsampled_try3_peak_16	176	7.11864	17.6258	15.2116	73
chr1	4961288	4961531	Project004-IPSHOCH-Exp5-ChIP-ES-2i-CTCF-IP-Blobel-Rep2-S1_S9_MACS2_rendition_1E-8_downsampled_try3_peak_17	193	9.39133	19.3098	16.8668	123
chr1	5007950	5008334	Project004-IPSHOCH-Exp5-ChIP-ES-2i-CTCF-IP-Blobel-Rep2-S1_S9_MACS2_rendition_1E-8_downsampled_try3_peak_18	710	25.5394	71.075	67.9279	151
chr1	5060337	5060664	Project004-IPSHOCH-Exp5-ChIP-ES-2i-CTCF-IP-Blobel-Rep2-S1_S9_MACS2_rendition_1E-8_downsampled_try3_peak_19	537	19.4595	53.7338	50.8181	188
chr1	5093280	5093551	Project004-IPSHOCH-Exp5-ChIP-ES-2i-CTCF-IP-Blobel-Rep2-S1_S9_MACS2_rendition_1E-8_downsampled_try3_peak_20	347	14.5448	34.7391	32.071	128
chr1	5128624	5128888	Project004-IPSHOCH-Exp5-ChIP-ES-2i-CTCF-IP-Blobel-Rep2-S1_S9_MACS2_rendition_1E-8_downsampled_try3_peak_21	535	22.1739	53.5683	50.6563	149
chr1	5173615	5173895	Project004-IPSHOCH-Exp5-ChIP-ES-2i-CTCF-IP-Blobel-Rep2-S1_S9_MACS2_rendition_1E-8_downsampled_try3_peak_22	621	22.9097	62.1974	59.17	138
chr1	5196892	5197195	Project004-IPSHOCH-Exp5-ChIP-ES-2i-CTCF-IP-Blobel-Rep2-S1_S9_MACS2_rendition_1E-8_downsampled_try3_peak_23	168	8.51351	16.8225	14.4247	186
chr1	5895030	5895226	Project004-IPSHOCH-Exp5-ChIP-ES-2i-CTCF-IP-Blobel-Rep2-S1_S9_MACS2_rendition_1E-8_downsampled_try3_peak_24	389	17.4224	38.9194	36.1955	89
chr1	5905410	5905711	Project004-IPSHOCH-Exp5-ChIP-ES-2i-CTCF-IP-Blobel-Rep2-S1_S9_MACS2_rendition_1E-8_downsampled_try3_peak_25	725	24.3243	72.5667	69.4011	177
chr1	5907929	5908257	Project004-IPSHOCH-Exp5-ChIP-ES-2i-CTCF-IP-Blobel-Rep2-S1_S9_MACS2_rendition_1E-8_downsampled_try3_peak_26	348	14.1892	34.8116	32.1402	178
chr1	6125196	6125491	Project004-IPSHOCH-Exp5-ChIP-ES-2i-CTCF-IP-Blobel-Rep2-S1_S9_MACS2_rendition_1E-8_downsampled_try3_peak_27	603	24.2857	60.3564	57.3534	164
chr1	6132392	6132549	Project004-IPSHOCH-Exp5-ChIP-ES-2i-CTCF-IP-Blobel-Rep2-S1_S9_MACS2_rendition_1E-8_downsampled_try3_peak_28	96	5.3125	9.62915	7.39569	7
chr1	6134068	6134435	Project004-IPSHOCH-Exp5-ChIP-ES-2i-CTCF-IP-Blobel-Rep2-S1_S9_MACS2_rendition_1E-8_downsampled_try3_peak_29	485	20.5901	48.5837	45.7327	120
chr1	6142595	6142851	Project004-IPSHOCH-Exp5-ChIP-ES-2i-CTCF-IP-Blobel-Rep2-S1_S9_MACS2_rendition_1E-8_downsampled_try3_peak_30	420	18.4783	42.0928	39.3241	138
chr1	6180736	6180932	Project004-IPSHOCH-Exp5-ChIP-ES-2i-CTCF-IP-Blobel-Rep2-S1_S9_MACS2_rendition_1E-8_downsampled_try3_peak_31	282	13.7267	28.2431	25.6591	100
chr1	6262378	6262703	Project004-IPSHOCH-Exp5-ChIP-ES-2i-CTCF-IP-Blobel-Rep2-S1_S9_MACS2_rendition_1E-8_downsampled_try3_peak_32	411	12.4576	41.1311	38.3776	145
chr1	6372833	6373058	Project004-IPSHOCH-Exp5-ChIP-ES-2i-CTCF-IP-Blobel-Rep2-S1_S9_MACS2_rendition_1E-8_downsampled_try3_peak_33	137	7.98722	13.7078	11.3722	108
chr1	6391678	6391871	Project004-IPSHOCH-Exp5-ChIP-ES-2i-CTCF-IP-Blobel-Rep2-S1_S9_MACS2_rendition_1E-8_downsampled_try3_peak_34	293	12.5676	29.3754	26.7781	110
chr1	6396387	6396723	Project004-IPSHOCH-Exp5-ChIP-ES-2i-CTCF-IP-Blobel-Rep2-S1_S9_MACS2_rendition_1E-8_downsampled_try3_peak_35	687	24.7065	68.757	65.6441	185
chr1	6400218	6400461	Project004-IPSHOCH-Exp5-ChIP-ES-2i-CTCF-IP-Blobel-Rep2-S1_S9_MACS2_rendition_1E-8_downsampled_try3_peak_36	518	21.646	51.8962	49.0047	125
chr1	6407984	6408298	Project004-IPSHOCH-Exp5-ChIP-ES-2i-CTCF-IP-Blobel-Rep2-S1_S9_MACS2_rendition_1E-8_downsampled_try3_peak_37	594	18.125	59.4496	56.4592	149
chr1	6473385	6473672	Project004-IPSHOCH-Exp5-ChIP-ES-2i-CTCF-IP-Blobel-Rep2-S1_S9_MACS2_rendition_1E-8_downsampled_try3_peak_38	419	17.9712	41.9443	39.1805	129
chr1	6849171	6849410	Project004-IPSHOCH-Exp5-ChIP-ES-2i-CTCF-IP-Blobel-Rep2-S1_S9_MACS2_rendition_1E-8_downsampled_try3_peak_39	522	19.0541	52.2186	49.3222	118
chr1	6959514	6959716	Project004-IPSHOCH-Exp5-ChIP-ES-2i-CTCF-IP-Blobel-Rep2-S1_S9_MACS2_rendition_1E-8_downsampled_try3_peak_40	239	12.1429	23.9023	21.3845	88
chr1	6969809	6970016	Project004-IPSHOCH-Exp5-ChIP-ES-2i-CTCF-IP-Blobel-Rep2-S1_S9_MACS2_rendition_1E-8_downsampled_try3_peak_41	197	10.559	19.7277	17.2736	81
chr1	6987735	6988044	Project004-IPSHOCH-Exp5-ChIP-ES-2i-CTCF-IP-Blobel-Rep2-S1_S9_MACS2_rendition_1E-8_downsampled_try3_peak_42	436	19.0062	43.698	40.9081	139
chr1	7000353	7000555	Project004-IPSHOCH-Exp5-ChIP-ES-2i-CTCF-IP-Blobel-Rep2-S1_S9_MACS2_rendition_1E-8_downsampled_try3_peak_43	279	8.78571	27.9421	25.3683	72
chr1	7093838	7094052	Project004-IPSHOCH-Exp5-ChIP-ES-2i-CTCF-IP-Blobel-Rep2-S1_S9_MACS2_rendition_1E-8_downsampled_try3_peak_44	163	9.08675	16.3601	13.9728	122
chr1	7194889	7195185	Project004-IPSHOCH-Exp5-ChIP-ES-2i-CTCF-IP-Blobel-Rep2-S1_S9_MACS2_rendition_1E-8_downsampled_try3_peak_45	436	10.1087	43.6456	40.86	148
chr1	7208988	7209299	Project004-IPSHOCH-Exp5-ChIP-ES-2i-CTCF-IP-Blobel-Rep2-S1_S9_MACS2_rendition_1E-8_downsampled_try3_peak_46	436	19.0062	43.698	40.9081	180
chr1	7253245	7253424	Project004-IPSHOCH-Exp5-ChIP-ES-2i-CTCF-IP-Blobel-Rep2-S1_S9_MACS2_rendition_1E-8_downsampled_try3_peak_47	241	11.9808	24.1773	21.6542	98
chr1	7386956	7387722	Project004-IPSHOCH-Exp5-ChIP-ES-2i-CTCF-IP-Blobel-Rep2-S1_S9_MACS2_rendition_1E-8_downsampled_try3_peak_48	1550	50.6832	155.047	150.648	178
chr1	7388335	7388596	Project004-IPSHOCH-Exp5-ChIP-ES-2i-CTCF-IP-Blobel-Rep2-S1_S9_MACS2_rendition_1E-8_downsampled_try3_peak_49	725	20.9375	72.5608	69.3988	139
chr1	7533637	7533896	Project004-IPSHOCH-Exp5-ChIP-ES-2i-CTCF-IP-Blobel-Rep2-S1_S9_MACS2_rendition_1E-8_downsampled_try3_peak_50	569	23.2298	56.9428	53.9834	113
chr1	7759691	7760005	Project004-IPSHOCH-Exp5-ChIP-ES-2i-CTCF-IP-Blobel-Rep2-S1_S9_MACS2_rendition_1E-8_downsampled_try3_peak_51	552	22.7019	55.2506	52.3145	194
chr1	8277658	8277935	Project004-IPSHOCH-Exp5-ChIP-ES-2i-CTCF-IP-Blobel-Rep2-S1_S9_MACS2_rendition_1E-8_downsampled_try3_peak_52	357	16.3665	35.7978	33.1142	146
chr1	8668858	8669128	Project004-IPSHOCH-Exp5-ChIP-ES-2i-CTCF-IP-Blobel-Rep2-S1_S9_MACS2_rendition_1E-8_downsampled_try3_peak_53	469	20.0621	46.9438	44.1126	129
chr1	8750475	8750677	Project004-IPSHOCH-Exp5-ChIP-ES-2i-CTCF-IP-Blobel-Rep2-S1_S9_MACS2_rendition_1E-8_downsampled_try3_peak_54	186	8.125	18.6213	16.1884	90
chr1	9091032	9091184	Project004-IPSHOCH-Exp5-ChIP-ES-2i-CTCF-IP-Blobel-Rep2-S1_S9_MACS2_rendition_1E-8_downsampled_try3_peak_55	144	8.44721	14.4632	12.1115	60
chr1	9439184	9439368	Project004-IPSHOCH-Exp5-ChIP-ES-2i-CTCF-IP-Blobel-Rep2-S1_S9_MACS2_rendition_1E-8_downsampled_try3_peak_56	119	5.59322	11.9839	9.68737	111
chr1	9459532	9459876	Project004-IPSHOCH-Exp5-ChIP-ES-2i-CTCF-IP-Blobel-Rep2-S1_S9_MACS2_rendition_1E-8_downsampled_try3_peak_57	841	20.5932	84.165	80.8359	175
chr1	9531286	9531776	Project004-IPSHOCH-Exp5-ChIP-ES-2i-CTCF-IP-Blobel-Rep2-S1_S9_MACS2_rendition_1E-8_downsampled_try3_peak_58	1147	29.375	114.794	111.015	255
chr1	9535273	9535575	Project004-IPSHOCH-Exp5-ChIP-ES-2i-CTCF-IP-Blobel-Rep2-S1_S9_MACS2_rendition_1E-8_downsampled_try3_peak_59	667	23.5284	66.7262	63.6383	163
chr1	9535903	9536187	Project004-IPSHOCH-Exp5-ChIP-ES-2i-CTCF-IP-Blobel-Rep2-S1_S9_MACS2_rendition_1E-8_downsampled_try3_peak_60	234	9.27921	23.4484	20.9397	131
chr1	9539160	9539335	Project004-IPSHOCH-Exp5-ChIP-ES-2i-CTCF-IP-Blobel-Rep2-S1_S9_MACS2_rendition_1E-8_downsampled_try3_peak_61	197	8.4375	19.7116	17.2628	77
chr1	9563318	9563613	Project004-IPSHOCH-Exp5-ChIP-ES-2i-CTCF-IP-Blobel-Rep2-S1_S9_MACS2_rendition_1E-8_downsampled_try3_peak_62	807	26.3514	80.732	77.4509	143
chr1	9611575	9611828	Project004-IPSHOCH-Exp5-ChIP-ES-2i-CTCF-IP-Blobel-Rep2-S1_S9_MACS2_rendition_1E-8_downsampled_try3_peak_63	265	11.9781	26.5074	23.9555	128
chr1	9685653	9685909	Project004-IPSHOCH-Exp5-ChIP-ES-2i-CTCF-IP-Blobel-Rep2-S1_S9_MACS2_rendition_1E-8_downsampled_try3_peak_64	123	6.89189	12.3237	10.0212	116
chr1	9686953	9687236	Project004-IPSHOCH-Exp5-ChIP-ES-2i-CTCF-IP-Blobel-Rep2-S1_S9_MACS2_rendition_1E-8_downsampled_try3_peak_65	582	23.5106	58.2229	55.251	146
chr1	9693199	9693510	Project004-IPSHOCH-Exp5-ChIP-ES-2i-CTCF-IP-Blobel-Rep2-S1_S9_MACS2_rendition_1E-8_downsampled_try3_peak_66	741	24.7297	74.1858	70.9967	138
chr1	9719572	9719918	Project004-IPSHOCH-Exp5-ChIP-ES-2i-CTCF-IP-Blobel-Rep2-S1_S9_MACS2_rendition_1E-8_downsampled_try3_peak_67	327	15.3106	32.7313	30.0878	99
chr1	9727930	9728141	Project004-IPSHOCH-Exp5-ChIP-ES-2i-CTCF-IP-Blobel-Rep2-S1_S9_MACS2_rendition_1E-8_downsampled_try3_peak_68	154	7.1875	15.4506	13.0818	79
chr1	9762878	9763192	Project004-IPSHOCH-Exp5-ChIP-ES-2i-CTCF-IP-Blobel-Rep2-S1_S9_MACS2_rendition_1E-8_downsampled_try3_peak_69	877	24.0625	87.7384	84.3566	148
chr1	9836006	9836219	Project004-IPSHOCH-Exp5-ChIP-ES-2i-CTCF-IP-Blobel-Rep2-S1_S9_MACS2_rendition_1E-8_downsampled_try3_peak_70	156	8.10811	15.6651	13.2917	146
chr1	9855546	9855742	Project004-IPSHOCH-Exp5-ChIP-ES-2i-CTCF-IP-Blobel-Rep2-S1_S9_MACS2_rendition_1E-8_downsampled_try3_peak_71	306	14.4604	30.6767	28.0644	115
chr1	9980178	9980403	Project004-IPSHOCH-Exp5-ChIP-ES-2i-CTCF-IP-Blobel-Rep2-S1_S9_MACS2_rendition_1E-8_downsampled_try3_peak_72	208	10.9081	20.8008	18.3349	106
chr1	9997290	9997763	Project004-IPSHOCH-Exp5-ChIP-ES-2i-CTCF-IP-Blobel-Rep2-S1_S9_MACS2_rendition_1E-8_downsampled_try3_peak_73	1081	37.7004	108.137	104.458	212
chr1	10029608	10029856	Project004-IPSHOCH-Exp5-ChIP-ES-2i-CTCF-IP-Blobel-Rep2-S1_S9_MACS2_rendition_1E-8_downsampled_try3_peak_74	822	26.1664	82.2803	78.9801	109
chr1	10079607	10080045	Project004-IPSHOCH-Exp5-ChIP-ES-2i-CTCF-IP-Blobel-Rep2-S1_S9_MACS2_rendition_1E-8_downsampled_try3_peak_75	1409	46.9876	140.928	136.739	226
chr1	10104861	10105019	Project004-IPSHOCH-Exp5-ChIP-ES-2i-CTCF-IP-Blobel-Rep2-S1_S9_MACS2_rendition_1E-8_downsampled_try3_peak_76	197	10.559	19.7277	17.2736	81
chr1	10171845	10172143	Project004-IPSHOCH-Exp5-ChIP-ES-2i-CTCF-IP-Blobel-Rep2-S1_S9_MACS2_rendition_1E-8_downsampled_try3_peak_77	297	14.2547	29.7236	27.1208	185
chr1	10187062	10187325	Project004-IPSHOCH-Exp5-ChIP-ES-2i-CTCF-IP-Blobel-Rep2-S1_S9_MACS2_rendition_1E-8_downsampled_try3_peak_78	208	8.75	20.8176	18.3492	137
chr1	10323001	10323188	Project004-IPSHOCH-Exp5-ChIP-ES-2i-CTCF-IP-Blobel-Rep2-S1_S9_MACS2_rendition_1E-8_downsampled_try3_peak_79	168	8.51351	16.8225	14.4247	101
chr1	10387945	10388261	Project004-IPSHOCH-Exp5-ChIP-ES-2i-CTCF-IP-Blobel-Rep2-S1_S9_MACS2_rendition_1E-8_downsampled_try3_peak_80	708	27.4534	70.815	67.6748	169
chr1	10478333	10478643	Project004-IPSHOCH-Exp5-ChIP-ES-2i-CTCF-IP-Blobel-Rep2-S1_S9_MACS2_rendition_1E-8_downsampled_try3_peak_81	552	19.8649	55.2579	52.3185	167
chr1	10749602	10750065	Project004-IPSHOCH-Exp5-ChIP-ES-2i-CTCF-IP-Blobel-Rep2-S1_S9_MACS2_rendition_1E-8_downsampled_try3_peak_82	551	15.2542	55.131	52.2013	259
chr1	10825799	10826046	Project004-IPSHOCH-Exp5-ChIP-ES-2i-CTCF-IP-Blobel-Rep2-S1_S9_MACS2_rendition_1E-8_downsampled_try3_peak_83	552	22.7019	55.2506	52.3145	134
chr1	10827347	10827561	Project004-IPSHOCH-Exp5-ChIP-ES-2i-CTCF-IP-Blobel-Rep2-S1_S9_MACS2_rendition_1E-8_downsampled_try3_peak_84	327	15.3106	32.7313	30.0878	100
chr1	10994261	10994476	Project004-IPSHOCH-Exp5-ChIP-ES-2i-CTCF-IP-Blobel-Rep2-S1_S9_MACS2_rendition_1E-8_downsampled_try3_peak_85	112	6.48649	11.2573	8.98216	179
chr1	11055303	11055542	Project004-IPSHOCH-Exp5-ChIP-ES-2i-CTCF-IP-Blobel-Rep2-S1_S9_MACS2_rendition_1E-8_downsampled_try3_peak_86	403	17.024	40.3441	37.6039	135
chr1	11087339	11087600	Project004-IPSHOCH-Exp5-ChIP-ES-2i-CTCF-IP-Blobel-Rep2-S1_S9_MACS2_rendition_1E-8_downsampled_try3_peak_87	342	15.8385	34.2574	31.5934	110
chr1	11130119	11130324	Project004-IPSHOCH-Exp5-ChIP-ES-2i-CTCF-IP-Blobel-Rep2-S1_S9_MACS2_rendition_1E-8_downsampled_try3_peak_88	258	12.2951	25.8457	23.2992	105
chr1	11141729	11141893	Project004-IPSHOCH-Exp5-ChIP-ES-2i-CTCF-IP-Blobel-Rep2-S1_S9_MACS2_rendition_1E-8_downsampled_try3_peak_89	234	10.5447	23.4715	20.9621	89
chr1	11224037	11224300	Project004-IPSHOCH-Exp5-ChIP-ES-2i-CTCF-IP-Blobel-Rep2-S1_S9_MACS2_rendition_1E-8_downsampled_try3_peak_90	557	18.3078	55.7259	52.7829	111
chr1	11341204	11341367	Project004-IPSHOCH-Exp5-ChIP-ES-2i-CTCF-IP-Blobel-Rep2-S1_S9_MACS2_rendition_1E-8_downsampled_try3_peak_91	205	9.79965	20.53	18.0663	57
chr1	11375964	11376210	Project004-IPSHOCH-Exp5-ChIP-ES-2i-CTCF-IP-Blobel-Rep2-S1_S9_MACS2_rendition_1E-8_downsampled_try3_peak_92	507	18.6486	50.7125	47.8363	136
chr1	11404122	11404494	Project004-IPSHOCH-Exp5-ChIP-ES-2i-CTCF-IP-Blobel-Rep2-S1_S9_MACS2_rendition_1E-8_downsampled_try3_peak_93	678	13.5326	67.8349	64.7317	186
chr1	11456440	11456756	Project004-IPSHOCH-Exp5-ChIP-ES-2i-CTCF-IP-Blobel-Rep2-S1_S9_MACS2_rendition_1E-8_downsampled_try3_peak_94	833	31.1491	83.3915	80.0737	148
chr1	11555502	11555741	Project004-IPSHOCH-Exp5-ChIP-ES-2i-CTCF-IP-Blobel-Rep2-S1_S9_MACS2_rendition_1E-8_downsampled_try3_peak_95	518	21.646	51.8962	49.0047	100
chr1	11647722	11648122	Project004-IPSHOCH-Exp5-ChIP-ES-2i-CTCF-IP-Blobel-Rep2-S1_S9_MACS2_rendition_1E-8_downsampled_try3_peak_96	925	33.7888	92.5964	89.1465	259
chr1	12018212	12018524	Project004-IPSHOCH-Exp5-ChIP-ES-2i-CTCF-IP-Blobel-Rep2-S1_S9_MACS2_rendition_1E-8_downsampled_try3_peak_97	743	28.5093	74.3692	71.1746	143
chr1	12689202	12689533	Project004-IPSHOCH-Exp5-ChIP-ES-2i-CTCF-IP-Blobel-Rep2-S1_S9_MACS2_rendition_1E-8_downsampled_try3_peak_98	790	25.9459	79.0852	75.8275	150
chr1	12691765	12692011	Project004-IPSHOCH-Exp5-ChIP-ES-2i-CTCF-IP-Blobel-Rep2-S1_S9_MACS2_rendition_1E-8_downsampled_try3_peak_99	535	16.7217	53.5121	50.6035	136
chr1	12808883	12809152	Project004-IPSHOCH-Exp5-ChIP-ES-2i-CTCF-IP-Blobel-Rep2-S1_S9_MACS2_rendition_1E-8_downsampled_try3_peak_100	255	12.1037	25.5258	22.9821	120
chr1	12826913	12827226	Project004-IPSHOCH-Exp5-ChIP-ES-2i-CTCF-IP-Blobel-Rep2-S1_S9_MACS2_rendition_1E-8_downsampled_try3_peak_101	710	20.625	71.0769	67.9279	148
chr1	12832819	12833082	Project004-IPSHOCH-Exp5-ChIP-ES-2i-CTCF-IP-Blobel-Rep2-S1_S9_MACS2_rendition_1E-8_downsampled_try3_peak_102	555	20.5339	55.5991	52.6572	128
chr1	12854194	12854520	Project004-IPSHOCH-Exp5-ChIP-ES-2i-CTCF-IP-Blobel-Rep2-S1_S9_MACS2_rendition_1E-8_downsampled_try3_peak_103	344	10.0714	34.4499	31.7837	132
chr1	12855528	12855760	Project004-IPSHOCH-Exp5-ChIP-ES-2i-CTCF-IP-Blobel-Rep2-S1_S9_MACS2_rendition_1E-8_downsampled_try3_peak_104	323	12.4355	32.3773	29.7413	102
chr1	12903436	12903669	Project004-IPSHOCH-Exp5-ChIP-ES-2i-CTCF-IP-Blobel-Rep2-S1_S9_MACS2_rendition_1E-8_downsampled_try3_peak_105	348	14.1892	34.8116	32.1402	127
chr1	12925908	12926239	Project004-IPSHOCH-Exp5-ChIP-ES-2i-CTCF-IP-Blobel-Rep2-S1_S9_MACS2_rendition_1E-8_downsampled_try3_peak_106	331	8.47826	33.1511	30.503	149
chr1	12980188	12980718	Project004-IPSHOCH-Exp5-ChIP-ES-2i-CTCF-IP-Blobel-Rep2-S1_S9_MACS2_rendition_1E-8_downsampled_try3_peak_107	1423	30.2542	142.393	138.184	247
chr1	12982807	12982959	Project004-IPSHOCH-Exp5-ChIP-ES-2i-CTCF-IP-Blobel-Rep2-S1_S9_MACS2_rendition_1E-8_downsampled_try3_peak_108	175	7.8125	17.5473	15.135	80
chr1	13040234	13040544	Project004-IPSHOCH-Exp5-ChIP-ES-2i-CTCF-IP-Blobel-Rep2-S1_S9_MACS2_rendition_1E-8_downsampled_try3_peak_109	1113	29.1866	111.384	107.662	162
chr1	13042080	13042367	Project004-IPSHOCH-Exp5-ChIP-ES-2i-CTCF-IP-Blobel-Rep2-S1_S9_MACS2_rendition_1E-8_downsampled_try3_peak_110	740	21.25	74.0511	70.8668	141
chr1	13069689	13069938	Project004-IPSHOCH-Exp5-ChIP-ES-2i-CTCF-IP-Blobel-Rep2-S1_S9_MACS2_rendition_1E-8_downsampled_try3_peak_111	219	9.0625	21.9387	19.4506	130
chr1	13107878	13108124	Project004-IPSHOCH-Exp5-ChIP-ES-2i-CTCF-IP-Blobel-Rep2-S1_S9_MACS2_rendition_1E-8_downsampled_try3_peak_112	280	12.1622	28.0497	25.4722	99
chr1	13108251	13108511	Project004-IPSHOCH-Exp5-ChIP-ES-2i-CTCF-IP-Blobel-Rep2-S1_S9_MACS2_rendition_1E-8_downsampled_try3_peak_113	182	9.33986	18.2016	15.7796	128
chr1	13124445	13124753	Project004-IPSHOCH-Exp5-ChIP-ES-2i-CTCF-IP-Blobel-Rep2-S1_S9_MACS2_rendition_1E-8_downsampled_try3_peak_114	654	13.2065	65.4222	62.3544	141
chr1	13128370	13128665	Project004-IPSHOCH-Exp5-ChIP-ES-2i-CTCF-IP-Blobel-Rep2-S1_S9_MACS2_rendition_1E-8_downsampled_try3_peak_115	462	17.4324	46.2512	43.4318	166
chr1	13132932	13133303	Project004-IPSHOCH-Exp5-ChIP-ES-2i-CTCF-IP-Blobel-Rep2-S1_S9_MACS2_rendition_1E-8_downsampled_try3_peak_116	634	15.2143	63.4361	60.3933	202
chr1	13141062	13141581	Project004-IPSHOCH-Exp5-ChIP-ES-2i-CTCF-IP-Blobel-Rep2-S1_S9_MACS2_rendition_1E-8_downsampled_try3_peak_117	1009	31.2162	100.983	97.4101	262
chr1	13189280	13189498	Project004-IPSHOCH-Exp5-ChIP-ES-2i-CTCF-IP-Blobel-Rep2-S1_S9_MACS2_rendition_1E-8_downsampled_try3_peak_118	197	8.4375	19.7116	17.2628	94
chr1	13217377	13217659	Project004-IPSHOCH-Exp5-ChIP-ES-2i-CTCF-IP-Blobel-Rep2-S1_S9_MACS2_rendition_1E-8_downsampled_try3_peak_119	661	21.7066	66.1371	63.0597	131
chr1	13253123	13253349	Project004-IPSHOCH-Exp5-ChIP-ES-2i-CTCF-IP-Blobel-Rep2-S1_S9_MACS2_rendition_1E-8_downsampled_try3_peak_120	388	16.9728	38.846	36.1265	129
chr1	13345706	13346096	Project004-IPSHOCH-Exp5-ChIP-ES-2i-CTCF-IP-Blobel-Rep2-S1_S9_MACS2_rendition_1E-8_downsampled_try3_peak_121	373	16.8944	37.3519	34.6487	182
chr1	13362929	13363264	Project004-IPSHOCH-Exp5-ChIP-ES-2i-CTCF-IP-Blobel-Rep2-S1_S9_MACS2_rendition_1E-8_downsampled_try3_peak_122	620	22.7955	62.0017	58.9793	189
chr1	13366955	13367188	Project004-IPSHOCH-Exp5-ChIP-ES-2i-CTCF-IP-Blobel-Rep2-S1_S9_MACS2_rendition_1E-8_downsampled_try3_peak_123	405	17.5698	40.5542	37.8047	127
chr1	13490595	13490878	Project004-IPSHOCH-Exp5-ChIP-ES-2i-CTCF-IP-Blobel-Rep2-S1_S9_MACS2_rendition_1E-8_downsampled_try3_peak_124	462	17.4324	46.2512	43.4318	197
chr1	13521614	13522004	Project004-IPSHOCH-Exp5-ChIP-ES-2i-CTCF-IP-Blobel-Rep2-S1_S9_MACS2_rendition_1E-8_downsampled_try3_peak_125	870	21.1017	87.0636	83.6956	173
chr1	13579879	13580246	Project004-IPSHOCH-Exp5-ChIP-ES-2i-CTCF-IP-Blobel-Rep2-S1_S9_MACS2_rendition_1E-8_downsampled_try3_peak_126	1263	31.5625	126.336	122.376	237
chr1	13615849	13616010	Project004-IPSHOCH-Exp5-ChIP-ES-2i-CTCF-IP-Blobel-Rep2-S1_S9_MACS2_rendition_1E-8_downsampled_try3_peak_127	134	5.57143	13.464	11.1323	28
chr1	13622386	13622623	Project004-IPSHOCH-Exp5-ChIP-ES-2i-CTCF-IP-Blobel-Rep2-S1_S9_MACS2_rendition_1E-8_downsampled_try3_peak_128	186	7.37288	18.6225	16.1885	117
chr1	13649934	13650155	Project004-IPSHOCH-Exp5-ChIP-ES-2i-CTCF-IP-Blobel-Rep2-S1_S9_MACS2_rendition_1E-8_downsampled_try3_peak_129	239	10.479	23.9339	21.4157	142
chr1	13687466	13687764	Project004-IPSHOCH-Exp5-ChIP-ES-2i-CTCF-IP-Blobel-Rep2-S1_S9_MACS2_rendition_1E-8_downsampled_try3_peak_130	301	11.25	30.1722	27.5636	163
chr1	13696363	13696850	Project004-IPSHOCH-Exp5-ChIP-ES-2i-CTCF-IP-Blobel-Rep2-S1_S9_MACS2_rendition_1E-8_downsampled_try3_peak_131	785	22.1875	78.5596	75.3095	222
chr1	13774456	13774809	Project004-IPSHOCH-Exp5-ChIP-ES-2i-CTCF-IP-Blobel-Rep2-S1_S9_MACS2_rendition_1E-8_downsampled_try3_peak_132	739	23.5778	73.948	70.7672	209
chr1	13779316	13779666	Project004-IPSHOCH-Exp5-ChIP-ES-2i-CTCF-IP-Blobel-Rep2-S1_S9_MACS2_rendition_1E-8_downsampled_try3_peak_133	1045	21.6429	104.559	100.934	145
chr1	13829752	13830013	Project004-IPSHOCH-Exp5-ChIP-ES-2i-CTCF-IP-Blobel-Rep2-S1_S9_MACS2_rendition_1E-8_downsampled_try3_peak_134	509	18.7827	50.9462	48.0685	137
chr1	14127832	14128038	Project004-IPSHOCH-Exp5-ChIP-ES-2i-CTCF-IP-Blobel-Rep2-S1_S9_MACS2_rendition_1E-8_downsampled_try3_peak_135	170	9.50311	17.0487	14.6428	92
chr1	14167354	14167561	Project004-IPSHOCH-Exp5-ChIP-ES-2i-CTCF-IP-Blobel-Rep2-S1_S9_MACS2_rendition_1E-8_downsampled_try3_peak_136	282	13.7267	28.2431	25.6591	101
chr1	14560787	14561064	Project004-IPSHOCH-Exp5-ChIP-ES-2i-CTCF-IP-Blobel-Rep2-S1_S9_MACS2_rendition_1E-8_downsampled_try3_peak_137	334	13.7838	33.4333	30.7802	140
chr1	14676361	14676550	Project004-IPSHOCH-Exp5-ChIP-ES-2i-CTCF-IP-Blobel-Rep2-S1_S9_MACS2_rendition_1E-8_downsampled_try3_peak_138	379	16.8486	37.9484	35.2349	118
chr1	14696349	14696662	Project004-IPSHOCH-Exp5-ChIP-ES-2i-CTCF-IP-Blobel-Rep2-S1_S9_MACS2_rendition_1E-8_downsampled_try3_peak_139	512	20.3342	51.2269	48.3414	126
chr1	14719189	14719464	Project004-IPSHOCH-Exp5-ChIP-ES-2i-CTCF-IP-Blobel-Rep2-S1_S9_MACS2_rendition_1E-8_downsampled_try3_peak_140	712	16.5	71.2845	68.1339	145
chr1	14728406	14728831	Project004-IPSHOCH-Exp5-ChIP-ES-2i-CTCF-IP-Blobel-Rep2-S1_S9_MACS2_rendition_1E-8_downsampled_try3_peak_141	216	10.1351	21.6442	19.1618	109
chr1	14730217	14730422	Project004-IPSHOCH-Exp5-ChIP-ES-2i-CTCF-IP-Blobel-Rep2-S1_S9_MACS2_rendition_1E-8_downsampled_try3_peak_142	609	23.1715	60.9483	57.9372	102
chr1	14852558	14852710	Project004-IPSHOCH-Exp5-ChIP-ES-2i-CTCF-IP-Blobel-Rep2-S1_S9_MACS2_rendition_1E-8_downsampled_try3_peak_143	152	8.12799	15.2358	12.871	40
chr1	14970447	14970670	Project004-IPSHOCH-Exp5-ChIP-ES-2i-CTCF-IP-Blobel-Rep2-S1_S9_MACS2_rendition_1E-8_downsampled_try3_peak_144	552	22.7019	55.2506	52.3145	113
chr1	14997755	14998024	Project004-IPSHOCH-Exp5-ChIP-ES-2i-CTCF-IP-Blobel-Rep2-S1_S9_MACS2_rendition_1E-8_downsampled_try3_peak_145	469	20.0621	46.9438	44.1126	128
chr1	15007775	15008076	Project004-IPSHOCH-Exp5-ChIP-ES-2i-CTCF-IP-Blobel-Rep2-S1_S9_MACS2_rendition_1E-8_downsampled_try3_peak_146	312	14.7826	31.2198	28.5969	205
chr1	15101576	15101802	Project004-IPSHOCH-Exp5-ChIP-ES-2i-CTCF-IP-Blobel-Rep2-S1_S9_MACS2_rendition_1E-8_downsampled_try3_peak_147	289	10.9375	28.9576	26.3673	106
chr1	15317484	15317804	Project004-IPSHOCH-Exp5-ChIP-ES-2i-CTCF-IP-Blobel-Rep2-S1_S9_MACS2_rendition_1E-8_downsampled_try3_peak_148	770	21.875	77.0506	73.822	169
chr1	15611986	15612342	Project004-IPSHOCH-Exp5-ChIP-ES-2i-CTCF-IP-Blobel-Rep2-S1_S9_MACS2_rendition_1E-8_downsampled_try3_peak_149	1002	26.5625	100.288	96.727	211
chr1	15634174	15634342	Project004-IPSHOCH-Exp5-ChIP-ES-2i-CTCF-IP-Blobel-Rep2-S1_S9_MACS2_rendition_1E-8_downsampled_try3_peak_150	176	7.11864	17.6258	15.2116	78
chr1	15673766	15674098	Project004-IPSHOCH-Exp5-ChIP-ES-2i-CTCF-IP-Blobel-Rep2-S1_S9_MACS2_rendition_1E-8_downsampled_try3_peak_151	692	25.5359	69.2927	66.1726	158
chr1	15709552	15709867	Project004-IPSHOCH-Exp5-ChIP-ES-2i-CTCF-IP-Blobel-Rep2-S1_S9_MACS2_rendition_1E-8_downsampled_try3_peak_152	224	11.6149	22.4912	19.9952	179
chr1	15782019	15782338	Project004-IPSHOCH-Exp5-ChIP-ES-2i-CTCF-IP-Blobel-Rep2-S1_S9_MACS2_rendition_1E-8_downsampled_try3_peak_153	560	17.6403	56.0823	53.1363	172
chr1	15809190	15809392	Project004-IPSHOCH-Exp5-ChIP-ES-2i-CTCF-IP-Blobel-Rep2-S1_S9_MACS2_rendition_1E-8_downsampled_try3_peak_154	224	11.6149	22.4912	19.9952	113
chr1	15865227	15865443	Project004-IPSHOCH-Exp5-ChIP-ES-2i-CTCF-IP-Blobel-Rep2-S1_S9_MACS2_rendition_1E-8_downsampled_try3_peak_155	357	16.3665	35.7978	33.1142	93
chr1	15892572	15892844	Project004-IPSHOCH-Exp5-ChIP-ES-2i-CTCF-IP-Blobel-Rep2-S1_S9_MACS2_rendition_1E-8_downsampled_try3_peak_156	666	19.6875	66.6649	63.5776	148
chr1	15983667	15984035	Project004-IPSHOCH-Exp5-ChIP-ES-2i-CTCF-IP-Blobel-Rep2-S1_S9_MACS2_rendition_1E-8_downsampled_try3_peak_157	594	18.125	59.4496	56.4592	150
chr1	15997048	15997328	Project004-IPSHOCH-Exp5-ChIP-ES-2i-CTCF-IP-Blobel-Rep2-S1_S9_MACS2_rendition_1E-8_downsampled_try3_peak_158	621	22.9097	62.1974	59.17	134
chr1	16052064	16052562	Project004-IPSHOCH-Exp5-ChIP-ES-2i-CTCF-IP-Blobel-Rep2-S1_S9_MACS2_rendition_1E-8_downsampled_try3_peak_159	1057	37.4845	105.764	102.123	141
chr1	16055775	16055940	Project004-IPSHOCH-Exp5-ChIP-ES-2i-CTCF-IP-Blobel-Rep2-S1_S9_MACS2_rendition_1E-8_downsampled_try3_peak_160	132	7.91925	13.209	10.8855	79
chr1	16058187	16058427	Project004-IPSHOCH-Exp5-ChIP-ES-2i-CTCF-IP-Blobel-Rep2-S1_S9_MACS2_rendition_1E-8_downsampled_try3_peak_161	319	13.6892	31.9407	29.3103	118
chr1	16080957	16081165	Project004-IPSHOCH-Exp5-ChIP-ES-2i-CTCF-IP-Blobel-Rep2-S1_S9_MACS2_rendition_1E-8_downsampled_try3_peak_162	143	8.40831	14.399	12.0562	119
chr1	16095657	16096038	Project004-IPSHOCH-Exp5-ChIP-ES-2i-CTCF-IP-Blobel-Rep2-S1_S9_MACS2_rendition_1E-8_downsampled_try3_peak_163	585	20.8243	58.5922	55.6135	214
chr1	16150204	16150513	Project004-IPSHOCH-Exp5-ChIP-ES-2i-CTCF-IP-Blobel-Rep2-S1_S9_MACS2_rendition_1E-8_downsampled_try3_peak_164	587	21.3895	58.7361	55.7533	186
chr1	16295079	16295326	Project004-IPSHOCH-Exp5-ChIP-ES-2i-CTCF-IP-Blobel-Rep2-S1_S9_MACS2_rendition_1E-8_downsampled_try3_peak_165	297	14.2547	29.7236	27.1208	114
chr1	16423534	16423813	Project004-IPSHOCH-Exp5-ChIP-ES-2i-CTCF-IP-Blobel-Rep2-S1_S9_MACS2_rendition_1E-8_downsampled_try3_peak_166	779	29.5652	77.9552	74.7149	144
chr1	16430246	16430659	Project004-IPSHOCH-Exp5-ChIP-ES-2i-CTCF-IP-Blobel-Rep2-S1_S9_MACS2_rendition_1E-8_downsampled_try3_peak_167	655	25.8696	65.5462	62.4743	202
chr1	16481284	16481740	Project004-IPSHOCH-Exp5-ChIP-ES-2i-CTCF-IP-Blobel-Rep2-S1_S9_MACS2_rendition_1E-8_downsampled_try3_peak_168	666	19.6875	66.6649	63.5776	164
chr1	16509799	16510019	Project004-IPSHOCH-Exp5-ChIP-ES-2i-CTCF-IP-Blobel-Rep2-S1_S9_MACS2_rendition_1E-8_downsampled_try3_peak_169	241	11.9808	24.1773	21.6542	110
chr1	16544119	16544324	Project004-IPSHOCH-Exp5-ChIP-ES-2i-CTCF-IP-Blobel-Rep2-S1_S9_MACS2_rendition_1E-8_downsampled_try3_peak_170	215	11.0439	21.5387	19.0598	74
chr1	16567867	16568077	Project004-IPSHOCH-Exp5-ChIP-ES-2i-CTCF-IP-Blobel-Rep2-S1_S9_MACS2_rendition_1E-8_downsampled_try3_peak_171	268	8.57143	26.8926	24.3287	104
chr1	16621839	16622150	Project004-IPSHOCH-Exp5-ChIP-ES-2i-CTCF-IP-Blobel-Rep2-S1_S9_MACS2_rendition_1E-8_downsampled_try3_peak_172	725	24.3243	72.5667	69.4011	166
chr1	16788447	16788761	Project004-IPSHOCH-Exp5-ChIP-ES-2i-CTCF-IP-Blobel-Rep2-S1_S9_MACS2_rendition_1E-8_downsampled_try3_peak_173	924	29.1892	92.4393	88.9923	137
chr1	17103162	17103414	Project004-IPSHOCH-Exp5-ChIP-ES-2i-CTCF-IP-Blobel-Rep2-S1_S9_MACS2_rendition_1E-8_downsampled_try3_peak_174	416	14.0625	41.603	38.8452	136
chr1	17113526	17113852	Project004-IPSHOCH-Exp5-ChIP-ES-2i-CTCF-IP-Blobel-Rep2-S1_S9_MACS2_rendition_1E-8_downsampled_try3_peak_175	583	12.2283	58.3137	55.3415	192
chr1	17135626	17135889	Project004-IPSHOCH-Exp5-ChIP-ES-2i-CTCF-IP-Blobel-Rep2-S1_S9_MACS2_rendition_1E-8_downsampled_try3_peak_176	351	12.5	35.1463	32.4703	127
chr1	17153693	17153878	Project004-IPSHOCH-Exp5-ChIP-ES-2i-CTCF-IP-Blobel-Rep2-S1_S9_MACS2_rendition_1E-8_downsampled_try3_peak_177	191	9.32432	19.1965	16.7542	126
chr1	17619745	17619966	Project004-IPSHOCH-Exp5-ChIP-ES-2i-CTCF-IP-Blobel-Rep2-S1_S9_MACS2_rendition_1E-8_downsampled_try3_peak_178	502	21.118	50.2346	47.3624	130
chr1	17626136	17626354	Project004-IPSHOCH-Exp5-ChIP-ES-2i-CTCF-IP-Blobel-Rep2-S1_S9_MACS2_rendition_1E-8_downsampled_try3_peak_179	224	11.6149	22.4912	19.9952	80
chr1	17968241	17968512	Project004-IPSHOCH-Exp5-ChIP-ES-2i-CTCF-IP-Blobel-Rep2-S1_S9_MACS2_rendition_1E-8_downsampled_try3_peak_180	282	13.7267	28.2431	25.6591	93
chr1	17970748	17970991	Project004-IPSHOCH-Exp5-ChIP-ES-2i-CTCF-IP-Blobel-Rep2-S1_S9_MACS2_rendition_1E-8_downsampled_try3_peak_181	538	16.875	53.8102	50.8916	112
chr1	18002935	18003511	Project004-IPSHOCH-Exp5-ChIP-ES-2i-CTCF-IP-Blobel-Rep2-S1_S9_MACS2_rendition_1E-8_downsampled_try3_peak_182	655	25.8696	65.5462	62.4743	193
chr1	18096285	18096598	Project004-IPSHOCH-Exp5-ChIP-ES-2i-CTCF-IP-Blobel-Rep2-S1_S9_MACS2_rendition_1E-8_downsampled_try3_peak_183	614	21.4865	61.4404	58.4249	146
chr1	18096765	18097190	Project004-IPSHOCH-Exp5-ChIP-ES-2i-CTCF-IP-Blobel-Rep2-S1_S9_MACS2_rendition_1E-8_downsampled_try3_peak_184	598	21.0811	59.8822	56.8861	267
chr1	18121862	18122073	Project004-IPSHOCH-Exp5-ChIP-ES-2i-CTCF-IP-Blobel-Rep2-S1_S9_MACS2_rendition_1E-8_downsampled_try3_peak_185	282	13.7267	28.2431	25.6591	122
chr1	18274424	18274625	Project004-IPSHOCH-Exp5-ChIP-ES-2i-CTCF-IP-Blobel-Rep2-S1_S9_MACS2_rendition_1E-8_downsampled_try3_peak_186	170	9.50311	17.0487	14.6428	84
chr1	18279015	18279304	Project004-IPSHOCH-Exp5-ChIP-ES-2i-CTCF-IP-Blobel-Rep2-S1_S9_MACS2_rendition_1E-8_downsampled_try3_peak_187	777	25.7241	77.768	74.5318	138
chr1	18280265	18280453	Project004-IPSHOCH-Exp5-ChIP-ES-2i-CTCF-IP-Blobel-Rep2-S1_S9_MACS2_rendition_1E-8_downsampled_try3_peak_188	216	10.1351	21.6442	19.1618	105
chr1	18350083	18350303	Project004-IPSHOCH-Exp5-ChIP-ES-2i-CTCF-IP-Blobel-Rep2-S1_S9_MACS2_rendition_1E-8_downsampled_try3_peak_189	342	15.8385	34.2574	31.5934	86
chr1	18402892	18403144	Project004-IPSHOCH-Exp5-ChIP-ES-2i-CTCF-IP-Blobel-Rep2-S1_S9_MACS2_rendition_1E-8_downsampled_try3_peak_190	241	10.9459	24.1597	21.6374	143
chr1	18600789	18601012	Project004-IPSHOCH-Exp5-ChIP-ES-2i-CTCF-IP-Blobel-Rep2-S1_S9_MACS2_rendition_1E-8_downsampled_try3_peak_191	267	13.1988	26.7789	24.2164	93
chr1	18783820	18784063	Project004-IPSHOCH-Exp5-ChIP-ES-2i-CTCF-IP-Blobel-Rep2-S1_S9_MACS2_rendition_1E-8_downsampled_try3_peak_192	699	26.4577	69.9849	66.8538	91
chr1	18966833	18967129	Project004-IPSHOCH-Exp5-ChIP-ES-2i-CTCF-IP-Blobel-Rep2-S1_S9_MACS2_rendition_1E-8_downsampled_try3_peak_193	447	17.027	44.7837	41.9846	148
chr1	19046387	19046747	Project004-IPSHOCH-Exp5-ChIP-ES-2i-CTCF-IP-Blobel-Rep2-S1_S9_MACS2_rendition_1E-8_downsampled_try3_peak_194	944	34.3168	94.4581	90.9801	225
chr1	19139917	19140149	Project004-IPSHOCH-Exp5-ChIP-ES-2i-CTCF-IP-Blobel-Rep2-S1_S9_MACS2_rendition_1E-8_downsampled_try3_peak_195	357	16.3665	35.7978	33.1142	106
chr1	19169122	19169359	Project004-IPSHOCH-Exp5-ChIP-ES-2i-CTCF-IP-Blobel-Rep2-S1_S9_MACS2_rendition_1E-8_downsampled_try3_peak_196	390	15.4054	39.0183	36.2879	147
chr1	19182604	19182894	Project004-IPSHOCH-Exp5-ChIP-ES-2i-CTCF-IP-Blobel-Rep2-S1_S9_MACS2_rendition_1E-8_downsampled_try3_peak_197	186	8.125	18.6213	16.1884	139
chr1	19195693	19196043	Project004-IPSHOCH-Exp5-ChIP-ES-2i-CTCF-IP-Blobel-Rep2-S1_S9_MACS2_rendition_1E-8_downsampled_try3_peak_198	1268	41.9329	126.834	122.866	143
chr1	19196203	19196599	Project004-IPSHOCH-Exp5-ChIP-ES-2i-CTCF-IP-Blobel-Rep2-S1_S9_MACS2_rendition_1E-8_downsampled_try3_peak_199	418	16.2162	41.8796	39.1165	219
chr1	19280240	19280517	Project004-IPSHOCH-Exp5-ChIP-ES-2i-CTCF-IP-Blobel-Rep2-S1_S9_MACS2_rendition_1E-8_downsampled_try3_peak_200	672	26.3975	67.294	64.1994	139
chr1	19407084	19407336	Project004-IPSHOCH-Exp5-ChIP-ES-2i-CTCF-IP-Blobel-Rep2-S1_S9_MACS2_rendition_1E-8_downsampled_try3_peak_201	267	13.1988	26.7789	24.2164	139
chr1	19567297	19567471	Project004-IPSHOCH-Exp5-ChIP-ES-2i-CTCF-IP-Blobel-Rep2-S1_S9_MACS2_rendition_1E-8_downsampled_try3_peak_202	210	11.087	21.0994	18.6237	93
chr1	20279961	20280127	Project004-IPSHOCH-Exp5-ChIP-ES-2i-CTCF-IP-Blobel-Rep2-S1_S9_MACS2_rendition_1E-8_downsampled_try3_peak_203	281	12.2496	28.1996	25.62	92
chr1	20301619	20301901	Project004-IPSHOCH-Exp5-ChIP-ES-2i-CTCF-IP-Blobel-Rep2-S1_S9_MACS2_rendition_1E-8_downsampled_try3_peak_204	453	19.5342	45.3151	42.5059	151
chr1	20440259	20440545	Project004-IPSHOCH-Exp5-ChIP-ES-2i-CTCF-IP-Blobel-Rep2-S1_S9_MACS2_rendition_1E-8_downsampled_try3_peak_205	510	16.25	51.0377	48.1559	145
chr1	20503851	20504132	Project004-IPSHOCH-Exp5-ChIP-ES-2i-CTCF-IP-Blobel-Rep2-S1_S9_MACS2_rendition_1E-8_downsampled_try3_peak_206	355	10.2857	35.5676	32.8892	135
chr1	20534639	20534964	Project004-IPSHOCH-Exp5-ChIP-ES-2i-CTCF-IP-Blobel-Rep2-S1_S9_MACS2_rendition_1E-8_downsampled_try3_peak_207	1134	39.5963	113.423	109.663	182
chr1	20544536	20544906	Project004-IPSHOCH-Exp5-ChIP-ES-2i-CTCF-IP-Blobel-Rep2-S1_S9_MACS2_rendition_1E-8_downsampled_try3_peak_208	755	21.5625	75.5477	72.342	142
chr1	20602758	20603182	Project004-IPSHOCH-Exp5-ChIP-ES-2i-CTCF-IP-Blobel-Rep2-S1_S9_MACS2_rendition_1E-8_downsampled_try3_peak_209	944	34.3168	94.4581	90.9801	228
chr1	20690116	20690428	Project004-IPSHOCH-Exp5-ChIP-ES-2i-CTCF-IP-Blobel-Rep2-S1_S9_MACS2_rendition_1E-8_downsampled_try3_peak_210	583	20.6757	58.3323	55.3559	167
chr1	20728678	20728860	Project004-IPSHOCH-Exp5-ChIP-ES-2i-CTCF-IP-Blobel-Rep2-S1_S9_MACS2_rendition_1E-8_downsampled_try3_peak_211	264	11.2275	26.4287	23.8773	91
chr1	20741188	20741461	Project004-IPSHOCH-Exp5-ChIP-ES-2i-CTCF-IP-Blobel-Rep2-S1_S9_MACS2_rendition_1E-8_downsampled_try3_peak_212	518	21.646	51.8962	49.0047	142
chr1	20752372	20752645	Project004-IPSHOCH-Exp5-ChIP-ES-2i-CTCF-IP-Blobel-Rep2-S1_S9_MACS2_rendition_1E-8_downsampled_try3_peak_213	376	13.125	37.6986	34.9866	107
chr1	20791901	20792104	Project004-IPSHOCH-Exp5-ChIP-ES-2i-CTCF-IP-Blobel-Rep2-S1_S9_MACS2_rendition_1E-8_downsampled_try3_peak_214	362	14.5946	36.202	33.5124	81
chr1	20881078	20881333	Project004-IPSHOCH-Exp5-ChIP-ES-2i-CTCF-IP-Blobel-Rep2-S1_S9_MACS2_rendition_1E-8_downsampled_try3_peak_215	316	10.4237	31.6051	28.9764	116
chr1	20899582	20899858	Project004-IPSHOCH-Exp5-ChIP-ES-2i-CTCF-IP-Blobel-Rep2-S1_S9_MACS2_rendition_1E-8_downsampled_try3_peak_216	117	7.01932	11.7422	9.45851	172
chr1	20915460	20915672	Project004-IPSHOCH-Exp5-ChIP-ES-2i-CTCF-IP-Blobel-Rep2-S1_S9_MACS2_rendition_1E-8_downsampled_try3_peak_217	216	10.1351	21.6442	19.1618	114
chr1	20923597	20923895	Project004-IPSHOCH-Exp5-ChIP-ES-2i-CTCF-IP-Blobel-Rep2-S1_S9_MACS2_rendition_1E-8_downsampled_try3_peak_218	873	31.2756	87.3411	83.9711	144
chr1	20929166	20929441	Project004-IPSHOCH-Exp5-ChIP-ES-2i-CTCF-IP-Blobel-Rep2-S1_S9_MACS2_rendition_1E-8_downsampled_try3_peak_219	433	17.9697	43.3985	40.6168	144
chr1	20930222	20930471	Project004-IPSHOCH-Exp5-ChIP-ES-2i-CTCF-IP-Blobel-Rep2-S1_S9_MACS2_rendition_1E-8_downsampled_try3_peak_220	186	8.125	18.6213	16.1884	117
chr1	20933180	20933419	Project004-IPSHOCH-Exp5-ChIP-ES-2i-CTCF-IP-Blobel-Rep2-S1_S9_MACS2_rendition_1E-8_downsampled_try3_peak_221	492	18.2432	49.2158	46.3584	114
chr1	21070574	21070811	Project004-IPSHOCH-Exp5-ChIP-ES-2i-CTCF-IP-Blobel-Rep2-S1_S9_MACS2_rendition_1E-8_downsampled_try3_peak_222	137	6.10169	13.796	11.459	135
chr1	21091367	21091704	Project004-IPSHOCH-Exp5-ChIP-ES-2i-CTCF-IP-Blobel-Rep2-S1_S9_MACS2_rendition_1E-8_downsampled_try3_peak_223	1009	31.2162	100.983	97.4101	151
chr1	21151946	21152373	Project004-IPSHOCH-Exp5-ChIP-ES-2i-CTCF-IP-Blobel-Rep2-S1_S9_MACS2_rendition_1E-8_downsampled_try3_peak_224	815	22.8125	81.5958	78.3013	158
chr1	21156279	21156648	Project004-IPSHOCH-Exp5-ChIP-ES-2i-CTCF-IP-Blobel-Rep2-S1_S9_MACS2_rendition_1E-8_downsampled_try3_peak_225	841	20.5932	84.165	80.8359	151
chr1	21203589	21203942	Project004-IPSHOCH-Exp5-ChIP-ES-2i-CTCF-IP-Blobel-Rep2-S1_S9_MACS2_rendition_1E-8_downsampled_try3_peak_226	1167	34.8649	116.709	112.899	211
chr1	21208486	21208933	Project004-IPSHOCH-Exp5-ChIP-ES-2i-CTCF-IP-Blobel-Rep2-S1_S9_MACS2_rendition_1E-8_downsampled_try3_peak_227	1232	38.632	123.296	119.384	181
chr1	21238034	21238241	Project004-IPSHOCH-Exp5-ChIP-ES-2i-CTCF-IP-Blobel-Rep2-S1_S9_MACS2_rendition_1E-8_downsampled_try3_peak_228	225	10.6947	22.5905	20.0935	86
chr1	21256874	21257157	Project004-IPSHOCH-Exp5-ChIP-ES-2i-CTCF-IP-Blobel-Rep2-S1_S9_MACS2_rendition_1E-8_downsampled_try3_peak_229	343	15.1324	34.3807	31.7152	144
chr1	21261571	21261793	Project004-IPSHOCH-Exp5-ChIP-ES-2i-CTCF-IP-Blobel-Rep2-S1_S9_MACS2_rendition_1E-8_downsampled_try3_peak_230	586	23.7578	58.6448	55.6626	129
chr1	21266298	21266594	Project004-IPSHOCH-Exp5-ChIP-ES-2i-CTCF-IP-Blobel-Rep2-S1_S9_MACS2_rendition_1E-8_downsampled_try3_peak_231	1200	36.7899	120.094	116.235	150
chr1	21334406	21334750	Project004-IPSHOCH-Exp5-ChIP-ES-2i-CTCF-IP-Blobel-Rep2-S1_S9_MACS2_rendition_1E-8_downsampled_try3_peak_232	461	13.4746	46.1105	43.2946	199
chr1	21344663	21344880	Project004-IPSHOCH-Exp5-ChIP-ES-2i-CTCF-IP-Blobel-Rep2-S1_S9_MACS2_rendition_1E-8_downsampled_try3_peak_233	183	10.0311	18.3771	15.9485	93
chr1	21384390	21384586	Project004-IPSHOCH-Exp5-ChIP-ES-2i-CTCF-IP-Blobel-Rep2-S1_S9_MACS2_rendition_1E-8_downsampled_try3_peak_234	247	12.3237	24.7499	22.2213	110
chr1	21401314	21401705	Project004-IPSHOCH-Exp5-ChIP-ES-2i-CTCF-IP-Blobel-Rep2-S1_S9_MACS2_rendition_1E-8_downsampled_try3_peak_235	642	24.1173	64.2609	61.2084	174
chr1	21409542	21409739	Project004-IPSHOCH-Exp5-ChIP-ES-2i-CTCF-IP-Blobel-Rep2-S1_S9_MACS2_rendition_1E-8_downsampled_try3_peak_236	327	15.3106	32.7313	30.0878	68
chr1	21451170	21451506	Project004-IPSHOCH-Exp5-ChIP-ES-2i-CTCF-IP-Blobel-Rep2-S1_S9_MACS2_rendition_1E-8_downsampled_try3_peak_237	929	22.1186	92.9226	89.468	171
chr1	21512158	21512501	Project004-IPSHOCH-Exp5-ChIP-ES-2i-CTCF-IP-Blobel-Rep2-S1_S9_MACS2_rendition_1E-8_downsampled_try3_peak_238	455	15	45.5931	42.7806	161
chr1	21951491	21951653	Project004-IPSHOCH-Exp5-ChIP-ES-2i-CTCF-IP-Blobel-Rep2-S1_S9_MACS2_rendition_1E-8_downsampled_try3_peak_239	123	6.89189	12.3237	10.0212	14
chr1	21973241	21973434	Project004-IPSHOCH-Exp5-ChIP-ES-2i-CTCF-IP-Blobel-Rep2-S1_S9_MACS2_rendition_1E-8_downsampled_try3_peak_240	267	13.1988	26.7789	24.2164	102
chr1	22095666	22095888	Project004-IPSHOCH-Exp5-ChIP-ES-2i-CTCF-IP-Blobel-Rep2-S1_S9_MACS2_rendition_1E-8_downsampled_try3_peak_241	469	20.0621	46.9438	44.1126	111
chr1	22259036	22259477	Project004-IPSHOCH-Exp5-ChIP-ES-2i-CTCF-IP-Blobel-Rep2-S1_S9_MACS2_rendition_1E-8_downsampled_try3_peak_242	975	30.4054	97.5482	94.025	219
chr1	22348393	22348669	Project004-IPSHOCH-Exp5-ChIP-ES-2i-CTCF-IP-Blobel-Rep2-S1_S9_MACS2_rendition_1E-8_downsampled_try3_peak_243	404	15.8108	40.4434	37.6984	127
chr1	22367866	22368091	Project004-IPSHOCH-Exp5-ChIP-ES-2i-CTCF-IP-Blobel-Rep2-S1_S9_MACS2_rendition_1E-8_downsampled_try3_peak_244	518	21.646	51.8962	49.0047	113
chr1	22376473	22376798	Project004-IPSHOCH-Exp5-ChIP-ES-2i-CTCF-IP-Blobel-Rep2-S1_S9_MACS2_rendition_1E-8_downsampled_try3_peak_245	442	14.6875	44.2539	41.4596	137
chr1	22494218	22494550	Project004-IPSHOCH-Exp5-ChIP-ES-2i-CTCF-IP-Blobel-Rep2-S1_S9_MACS2_rendition_1E-8_downsampled_try3_peak_246	743	28.5093	74.3692	71.1746	131
chr1	22504871	22505087	Project004-IPSHOCH-Exp5-ChIP-ES-2i-CTCF-IP-Blobel-Rep2-S1_S9_MACS2_rendition_1E-8_downsampled_try3_peak_247	313	14.4768	31.3272	28.7035	95
chr1	22547427	22547590	Project004-IPSHOCH-Exp5-ChIP-ES-2i-CTCF-IP-Blobel-Rep2-S1_S9_MACS2_rendition_1E-8_downsampled_try3_peak_248	119	7.3913	11.9826	9.68727	136
chr1	22611276	22611491	Project004-IPSHOCH-Exp5-ChIP-ES-2i-CTCF-IP-Blobel-Rep2-S1_S9_MACS2_rendition_1E-8_downsampled_try3_peak_249	327	15.3106	32.7313	30.0878	103
chr1	23068858	23069167	Project004-IPSHOCH-Exp5-ChIP-ES-2i-CTCF-IP-Blobel-Rep2-S1_S9_MACS2_rendition_1E-8_downsampled_try3_peak_250	581	22.9633	58.1031	55.1316	159
chr1	23121788	23121952	Project004-IPSHOCH-Exp5-ChIP-ES-2i-CTCF-IP-Blobel-Rep2-S1_S9_MACS2_rendition_1E-8_downsampled_try3_peak_251	156	6.61017	15.6784	13.3037	65
chr1	23175359	23175705	Project004-IPSHOCH-Exp5-ChIP-ES-2i-CTCF-IP-Blobel-Rep2-S1_S9_MACS2_rendition_1E-8_downsampled_try3_peak_252	598	21.0811	59.8822	56.8861	185
chr1	23293609	23294014	Project004-IPSHOCH-Exp5-ChIP-ES-2i-CTCF-IP-Blobel-Rep2-S1_S9_MACS2_rendition_1E-8_downsampled_try3_peak_253	537	19.4595	53.7338	50.8181	184
chr1	23331199	23331367	Project004-IPSHOCH-Exp5-ChIP-ES-2i-CTCF-IP-Blobel-Rep2-S1_S9_MACS2_rendition_1E-8_downsampled_try3_peak_254	242	9.6875	24.2245	21.699	65
chr1	23502307	23502505	Project004-IPSHOCH-Exp5-ChIP-ES-2i-CTCF-IP-Blobel-Rep2-S1_S9_MACS2_rendition_1E-8_downsampled_try3_peak_255	312	14.7826	31.2198	28.5969	126
chr1	23681830	23682163	Project004-IPSHOCH-Exp5-ChIP-ES-2i-CTCF-IP-Blobel-Rep2-S1_S9_MACS2_rendition_1E-8_downsampled_try3_peak_256	373	16.8944	37.3519	34.6487	146
chr1	23691375	23691626	Project004-IPSHOCH-Exp5-ChIP-ES-2i-CTCF-IP-Blobel-Rep2-S1_S9_MACS2_rendition_1E-8_downsampled_try3_peak_257	404	17.9503	40.4998	37.7504	118
chr1	23712391	23712783	Project004-IPSHOCH-Exp5-ChIP-ES-2i-CTCF-IP-Blobel-Rep2-S1_S9_MACS2_rendition_1E-8_downsampled_try3_peak_258	870	32.205	87.0524	83.6864	148
chr1	23769599	23770040	Project004-IPSHOCH-Exp5-ChIP-ES-2i-CTCF-IP-Blobel-Rep2-S1_S9_MACS2_rendition_1E-8_downsampled_try3_peak_259	1401	43.9786	140.158	135.981	191
chr1	23799600	23799933	Project004-IPSHOCH-Exp5-ChIP-ES-2i-CTCF-IP-Blobel-Rep2-S1_S9_MACS2_rendition_1E-8_downsampled_try3_peak_260	1066	27.8125	106.687	103.028	195
chr1	23833990	23834225	Project004-IPSHOCH-Exp5-ChIP-ES-2i-CTCF-IP-Blobel-Rep2-S1_S9_MACS2_rendition_1E-8_downsampled_try3_peak_261	351	11.1864	35.1054	32.4317	103
chr1	23912962	23913251	Project004-IPSHOCH-Exp5-ChIP-ES-2i-CTCF-IP-Blobel-Rep2-S1_S9_MACS2_rendition_1E-8_downsampled_try3_peak_262	502	21.118	50.2346	47.3624	162
chr1	23966328	23966656	Project004-IPSHOCH-Exp5-ChIP-ES-2i-CTCF-IP-Blobel-Rep2-S1_S9_MACS2_rendition_1E-8_downsampled_try3_peak_263	191	9.32432	19.1965	16.7542	131
chr1	24002322	24002603	Project004-IPSHOCH-Exp5-ChIP-ES-2i-CTCF-IP-Blobel-Rep2-S1_S9_MACS2_rendition_1E-8_downsampled_try3_peak_264	328	14.976	32.8034	30.1578	145
chr1	24008317	24008605	Project004-IPSHOCH-Exp5-ChIP-ES-2i-CTCF-IP-Blobel-Rep2-S1_S9_MACS2_rendition_1E-8_downsampled_try3_peak_265	241	10.9459	24.1597	21.6374	148
chr1	24141763	24142063	Project004-IPSHOCH-Exp5-ChIP-ES-2i-CTCF-IP-Blobel-Rep2-S1_S9_MACS2_rendition_1E-8_downsampled_try3_peak_266	614	21.4865	61.4404	58.4249	149
chr1	24143964	24144345	Project004-IPSHOCH-Exp5-ChIP-ES-2i-CTCF-IP-Blobel-Rep2-S1_S9_MACS2_rendition_1E-8_downsampled_try3_peak_267	1249	41.4337	124.911	120.975	194
chr1	24178353	24178646	Project004-IPSHOCH-Exp5-ChIP-ES-2i-CTCF-IP-Blobel-Rep2-S1_S9_MACS2_rendition_1E-8_downsampled_try3_peak_268	833	31.1491	83.3915	80.0737	149
chr1	24182076	24182267	Project004-IPSHOCH-Exp5-ChIP-ES-2i-CTCF-IP-Blobel-Rep2-S1_S9_MACS2_rendition_1E-8_downsampled_try3_peak_269	170	9.50311	17.0487	14.6428	96
chr1	24246107	24246342	Project004-IPSHOCH-Exp5-ChIP-ES-2i-CTCF-IP-Blobel-Rep2-S1_S9_MACS2_rendition_1E-8_downsampled_try3_peak_270	157	8.97516	15.7436	13.3619	88
chr1	24255986	24256321	Project004-IPSHOCH-Exp5-ChIP-ES-2i-CTCF-IP-Blobel-Rep2-S1_S9_MACS2_rendition_1E-8_downsampled_try3_peak_271	374	11.6949	37.4879	34.7824	157
chr1	24263339	24263564	Project004-IPSHOCH-Exp5-ChIP-ES-2i-CTCF-IP-Blobel-Rep2-S1_S9_MACS2_rendition_1E-8_downsampled_try3_peak_272	327	15.3106	32.7313	30.0878	112
chr1	24304269	24304541	Project004-IPSHOCH-Exp5-ChIP-ES-2i-CTCF-IP-Blobel-Rep2-S1_S9_MACS2_rendition_1E-8_downsampled_try3_peak_273	342	15.8385	34.2574	31.5934	141
chr1	24307580	24307855	Project004-IPSHOCH-Exp5-ChIP-ES-2i-CTCF-IP-Blobel-Rep2-S1_S9_MACS2_rendition_1E-8_downsampled_try3_peak_274	502	21.118	50.2346	47.3624	137
chr1	24309506	24309918	Project004-IPSHOCH-Exp5-ChIP-ES-2i-CTCF-IP-Blobel-Rep2-S1_S9_MACS2_rendition_1E-8_downsampled_try3_peak_275	907	28.7838	90.7481	87.3254	191
chr1	24344446	24344741	Project004-IPSHOCH-Exp5-ChIP-ES-2i-CTCF-IP-Blobel-Rep2-S1_S9_MACS2_rendition_1E-8_downsampled_try3_peak_276	598	21.0811	59.8822	56.8861	149
chr1	24374442	24374838	Project004-IPSHOCH-Exp5-ChIP-ES-2i-CTCF-IP-Blobel-Rep2-S1_S9_MACS2_rendition_1E-8_downsampled_try3_peak_277	665	25.4593	66.5471	63.4632	159
chr1	24381827	24382086	Project004-IPSHOCH-Exp5-ChIP-ES-2i-CTCF-IP-Blobel-Rep2-S1_S9_MACS2_rendition_1E-8_downsampled_try3_peak_278	518	21.646	51.8962	49.0047	141
chr1	24385322	24385620	Project004-IPSHOCH-Exp5-ChIP-ES-2i-CTCF-IP-Blobel-Rep2-S1_S9_MACS2_rendition_1E-8_downsampled_try3_peak_279	502	21.118	50.2346	47.3624	186
chr1	24640604	24640951	Project004-IPSHOCH-Exp5-ChIP-ES-2i-CTCF-IP-Blobel-Rep2-S1_S9_MACS2_rendition_1E-8_downsampled_try3_peak_280	743	28.5093	74.3692	71.1746	195
chr1	24685237	24685626	Project004-IPSHOCH-Exp5-ChIP-ES-2i-CTCF-IP-Blobel-Rep2-S1_S9_MACS2_rendition_1E-8_downsampled_try3_peak_281	1663	41.4517	166.33	161.766	177
chr1	24773763	24773998	Project004-IPSHOCH-Exp5-ChIP-ES-2i-CTCF-IP-Blobel-Rep2-S1_S9_MACS2_rendition_1E-8_downsampled_try3_peak_282	186	8.125	18.6213	16.1884	124
chr1	24776564	24776775	Project004-IPSHOCH-Exp5-ChIP-ES-2i-CTCF-IP-Blobel-Rep2-S1_S9_MACS2_rendition_1E-8_downsampled_try3_peak_283	248	8.8983	24.8937	22.3625	81
chr1	24958177	24958445	Project004-IPSHOCH-Exp5-ChIP-ES-2i-CTCF-IP-Blobel-Rep2-S1_S9_MACS2_rendition_1E-8_downsampled_try3_peak_284	692	25.5359	69.2927	66.1726	118
chr1	25561255	25561446	Project004-IPSHOCH-Exp5-ChIP-ES-2i-CTCF-IP-Blobel-Rep2-S1_S9_MACS2_rendition_1E-8_downsampled_try3_peak_285	327	15.3106	32.7313	30.0878	100
chr1	25567198	25567612	Project004-IPSHOCH-Exp5-ChIP-ES-2i-CTCF-IP-Blobel-Rep2-S1_S9_MACS2_rendition_1E-8_downsampled_try3_peak_286	852	31.677	85.2184	81.8757	151
chr1	25573364	25573551	Project004-IPSHOCH-Exp5-ChIP-ES-2i-CTCF-IP-Blobel-Rep2-S1_S9_MACS2_rendition_1E-8_downsampled_try3_peak_287	239	12.1429	23.9023	21.3845	67
chr1	25673922	25674117	Project004-IPSHOCH-Exp5-ChIP-ES-2i-CTCF-IP-Blobel-Rep2-S1_S9_MACS2_rendition_1E-8_downsampled_try3_peak_288	105	5.625	10.5451	8.29124	78
chr1	25753621	25753917	Project004-IPSHOCH-Exp5-ChIP-ES-2i-CTCF-IP-Blobel-Rep2-S1_S9_MACS2_rendition_1E-8_downsampled_try3_peak_289	535	22.1739	53.5683	50.6563	156
chr1	25883619	25883948	Project004-IPSHOCH-Exp5-ChIP-ES-2i-CTCF-IP-Blobel-Rep2-S1_S9_MACS2_rendition_1E-8_downsampled_try3_peak_290	771	26.9526	77.1316	73.9016	185
chr1	25941965	25942254	Project004-IPSHOCH-Exp5-ChIP-ES-2i-CTCF-IP-Blobel-Rep2-S1_S9_MACS2_rendition_1E-8_downsampled_try3_peak_291	631	24.4609	63.143	60.1038	142
chr1	26581427	26581665	Project004-IPSHOCH-Exp5-ChIP-ES-2i-CTCF-IP-Blobel-Rep2-S1_S9_MACS2_rendition_1E-8_downsampled_try3_peak_292	312	14.7826	31.2198	28.5969	87
chr1	26881092	26881300	Project004-IPSHOCH-Exp5-ChIP-ES-2i-CTCF-IP-Blobel-Rep2-S1_S9_MACS2_rendition_1E-8_downsampled_try3_peak_293	107	6.86335	10.7859	8.52048	139
chr1	26956827	26957023	Project004-IPSHOCH-Exp5-ChIP-ES-2i-CTCF-IP-Blobel-Rep2-S1_S9_MACS2_rendition_1E-8_downsampled_try3_peak_294	161	8.98562	16.1936	13.8079	63
chr1	26959283	26959446	Project004-IPSHOCH-Exp5-ChIP-ES-2i-CTCF-IP-Blobel-Rep2-S1_S9_MACS2_rendition_1E-8_downsampled_try3_peak_295	156	8.10811	15.6651	13.2917	69
chr1	27364356	27364543	Project004-IPSHOCH-Exp5-ChIP-ES-2i-CTCF-IP-Blobel-Rep2-S1_S9_MACS2_rendition_1E-8_downsampled_try3_peak_296	253	12.6708	25.3317	22.7939	76
chr1	27957158	27957438	Project004-IPSHOCH-Exp5-ChIP-ES-2i-CTCF-IP-Blobel-Rep2-S1_S9_MACS2_rendition_1E-8_downsampled_try3_peak_297	502	21.118	50.2346	47.3624	137
chr1	28472063	28472275	Project004-IPSHOCH-Exp5-ChIP-ES-2i-CTCF-IP-Blobel-Rep2-S1_S9_MACS2_rendition_1E-8_downsampled_try3_peak_298	239	12.1429	23.9023	21.3845	100
chr1	28488012	28488255	Project004-IPSHOCH-Exp5-ChIP-ES-2i-CTCF-IP-Blobel-Rep2-S1_S9_MACS2_rendition_1E-8_downsampled_try3_peak_299	351	12.5	35.1463	32.4703	128
chr1	29310865	29311046	Project004-IPSHOCH-Exp5-ChIP-ES-2i-CTCF-IP-Blobel-Rep2-S1_S9_MACS2_rendition_1E-8_downsampled_try3_peak_300	183	10.0311	18.3771	15.9485	76
chr1	29623044	29623211	Project004-IPSHOCH-Exp5-ChIP-ES-2i-CTCF-IP-Blobel-Rep2-S1_S9_MACS2_rendition_1E-8_downsampled_try3_peak_301	179	8.91892	17.9999	15.579	69
chr1	30201982	30202154	Project004-IPSHOCH-Exp5-ChIP-ES-2i-CTCF-IP-Blobel-Rep2-S1_S9_MACS2_rendition_1E-8_downsampled_try3_peak_302	157	8.97516	15.7436	13.3619	78
chr1	30316452	30316711	Project004-IPSHOCH-Exp5-ChIP-ES-2i-CTCF-IP-Blobel-Rep2-S1_S9_MACS2_rendition_1E-8_downsampled_try3_peak_303	544	21.2799	54.4297	51.5046	148
chr1	30641787	30642046	Project004-IPSHOCH-Exp5-ChIP-ES-2i-CTCF-IP-Blobel-Rep2-S1_S9_MACS2_rendition_1E-8_downsampled_try3_peak_304	690	26.9255	69.0503	65.9337	94
chr1	30653074	30653298	Project004-IPSHOCH-Exp5-ChIP-ES-2i-CTCF-IP-Blobel-Rep2-S1_S9_MACS2_rendition_1E-8_downsampled_try3_peak_305	389	17.4224	38.9194	36.1955	134
chr1	30753267	30753559	Project004-IPSHOCH-Exp5-ChIP-ES-2i-CTCF-IP-Blobel-Rep2-S1_S9_MACS2_rendition_1E-8_downsampled_try3_peak_306	334	13.7838	33.4333	30.7802	143
chr1	30757343	30757545	Project004-IPSHOCH-Exp5-ChIP-ES-2i-CTCF-IP-Blobel-Rep2-S1_S9_MACS2_rendition_1E-8_downsampled_try3_peak_307	327	15.3106	32.7313	30.0878	100
chr1	30797743	30798008	Project004-IPSHOCH-Exp5-ChIP-ES-2i-CTCF-IP-Blobel-Rep2-S1_S9_MACS2_rendition_1E-8_downsampled_try3_peak_308	482	15.625	48.2983	45.4524	125
chr1	30828738	30828982	Project004-IPSHOCH-Exp5-ChIP-ES-2i-CTCF-IP-Blobel-Rep2-S1_S9_MACS2_rendition_1E-8_downsampled_try3_peak_309	348	14.1892	34.8116	32.1402	136
chr1	30835404	30835860	Project004-IPSHOCH-Exp5-ChIP-ES-2i-CTCF-IP-Blobel-Rep2-S1_S9_MACS2_rendition_1E-8_downsampled_try3_peak_310	1131	34.054	113.178	109.421	257
chr1	30837044	30837441	Project004-IPSHOCH-Exp5-ChIP-ES-2i-CTCF-IP-Blobel-Rep2-S1_S9_MACS2_rendition_1E-8_downsampled_try3_peak_311	979	35.2098	97.921	94.3962	260
chr1	30977623	30977996	Project004-IPSHOCH-Exp5-ChIP-ES-2i-CTCF-IP-Blobel-Rep2-S1_S9_MACS2_rendition_1E-8_downsampled_try3_peak_312	477	17.8378	47.7286	44.8901	190
chr1	30987738	30988043	Project004-IPSHOCH-Exp5-ChIP-ES-2i-CTCF-IP-Blobel-Rep2-S1_S9_MACS2_rendition_1E-8_downsampled_try3_peak_313	404	15.8108	40.4434	37.6984	132
chr1	31000547	31000736	Project004-IPSHOCH-Exp5-ChIP-ES-2i-CTCF-IP-Blobel-Rep2-S1_S9_MACS2_rendition_1E-8_downsampled_try3_peak_314	164	8.55578	16.412	14.0239	82
chr1	31005239	31005501	Project004-IPSHOCH-Exp5-ChIP-ES-2i-CTCF-IP-Blobel-Rep2-S1_S9_MACS2_rendition_1E-8_downsampled_try3_peak_315	492	18.2432	49.2158	46.3584	136
chr1	31210897	31211151	Project004-IPSHOCH-Exp5-ChIP-ES-2i-CTCF-IP-Blobel-Rep2-S1_S9_MACS2_rendition_1E-8_downsampled_try3_peak_316	580	17.8125	58.0283	55.0577	135
chr1	31266993	31267317	Project004-IPSHOCH-Exp5-ChIP-ES-2i-CTCF-IP-Blobel-Rep2-S1_S9_MACS2_rendition_1E-8_downsampled_try3_peak_317	655	25.8696	65.5462	62.4743	176
chr1	31394041	31394265	Project004-IPSHOCH-Exp5-ChIP-ES-2i-CTCF-IP-Blobel-Rep2-S1_S9_MACS2_rendition_1E-8_downsampled_try3_peak_318	357	16.3665	35.7978	33.1142	93
chr1	31892189	31892411	Project004-IPSHOCH-Exp5-ChIP-ES-2i-CTCF-IP-Blobel-Rep2-S1_S9_MACS2_rendition_1E-8_downsampled_try3_peak_319	357	16.3665	35.7978	33.1142	97
chr1	31948813	31949016	Project004-IPSHOCH-Exp5-ChIP-ES-2i-CTCF-IP-Blobel-Rep2-S1_S9_MACS2_rendition_1E-8_downsampled_try3_peak_320	267	13.1988	26.7789	24.2164	106
chr1	32052769	32053008	Project004-IPSHOCH-Exp5-ChIP-ES-2i-CTCF-IP-Blobel-Rep2-S1_S9_MACS2_rendition_1E-8_downsampled_try3_peak_321	436	19.0062	43.698	40.9081	133
chr1	32757042	32757308	Project004-IPSHOCH-Exp5-ChIP-ES-2i-CTCF-IP-Blobel-Rep2-S1_S9_MACS2_rendition_1E-8_downsampled_try3_peak_322	761	27.4275	76.1126	72.8984	140
chr1	33021859	33022174	Project004-IPSHOCH-Exp5-ChIP-ES-2i-CTCF-IP-Blobel-Rep2-S1_S9_MACS2_rendition_1E-8_downsampled_try3_peak_323	870	32.205	87.0524	83.6864	131
chr1	33079772	33080036	Project004-IPSHOCH-Exp5-ChIP-ES-2i-CTCF-IP-Blobel-Rep2-S1_S9_MACS2_rendition_1E-8_downsampled_try3_peak_324	485	20.5901	48.5837	45.7327	141
chr1	33260455	33260629	Project004-IPSHOCH-Exp5-ChIP-ES-2i-CTCF-IP-Blobel-Rep2-S1_S9_MACS2_rendition_1E-8_downsampled_try3_peak_325	282	13.7267	28.2431	25.6591	51
chr1	33353054	33353255	Project004-IPSHOCH-Exp5-ChIP-ES-2i-CTCF-IP-Blobel-Rep2-S1_S9_MACS2_rendition_1E-8_downsampled_try3_peak_326	316	13.9255	31.6859	29.0565	122
chr1	33580940	33581199	Project004-IPSHOCH-Exp5-ChIP-ES-2i-CTCF-IP-Blobel-Rep2-S1_S9_MACS2_rendition_1E-8_downsampled_try3_peak_327	156	8.10811	15.6651	13.2917	30
chr1	33593542	33593815	Project004-IPSHOCH-Exp5-ChIP-ES-2i-CTCF-IP-Blobel-Rep2-S1_S9_MACS2_rendition_1E-8_downsampled_try3_peak_328	479	17.966	47.9518	45.1116	136
chr1	33622612	33623037	Project004-IPSHOCH-Exp5-ChIP-ES-2i-CTCF-IP-Blobel-Rep2-S1_S9_MACS2_rendition_1E-8_downsampled_try3_peak_329	1838	48.4274	183.884	179.088	193
chr1	33653960	33654192	Project004-IPSHOCH-Exp5-ChIP-ES-2i-CTCF-IP-Blobel-Rep2-S1_S9_MACS2_rendition_1E-8_downsampled_try3_peak_330	621	22.9097	62.1974	59.17	100
chr1	33667776	33667944	Project004-IPSHOCH-Exp5-ChIP-ES-2i-CTCF-IP-Blobel-Rep2-S1_S9_MACS2_rendition_1E-8_downsampled_try3_peak_331	156	8.10811	15.6651	13.2917	57
chr1	33697562	33697817	Project004-IPSHOCH-Exp5-ChIP-ES-2i-CTCF-IP-Blobel-Rep2-S1_S9_MACS2_rendition_1E-8_downsampled_try3_peak_332	210	9.76359	21.0097	18.5392	112
chr1	33719967	33720334	Project004-IPSHOCH-Exp5-ChIP-ES-2i-CTCF-IP-Blobel-Rep2-S1_S9_MACS2_rendition_1E-8_downsampled_try3_peak_333	615	20.5838	61.5387	58.5219	243
chr1	33727258	33727471	Project004-IPSHOCH-Exp5-ChIP-ES-2i-CTCF-IP-Blobel-Rep2-S1_S9_MACS2_rendition_1E-8_downsampled_try3_peak_334	186	8.125	18.6213	16.1884	114
chr1	33729406	33729673	Project004-IPSHOCH-Exp5-ChIP-ES-2i-CTCF-IP-Blobel-Rep2-S1_S9_MACS2_rendition_1E-8_downsampled_try3_peak_335	867	31.4759	86.7391	83.377	123
chr1	33741191	33741660	Project004-IPSHOCH-Exp5-ChIP-ES-2i-CTCF-IP-Blobel-Rep2-S1_S9_MACS2_rendition_1E-8_downsampled_try3_peak_336	1076	38.0124	107.67	104	325
chr1	33784344	33784496	Project004-IPSHOCH-Exp5-ChIP-ES-2i-CTCF-IP-Blobel-Rep2-S1_S9_MACS2_rendition_1E-8_downsampled_try3_peak_337	128	5.84746	12.8808	10.5685	39
chr1	33796159	33796739	Project004-IPSHOCH-Exp5-ChIP-ES-2i-CTCF-IP-Blobel-Rep2-S1_S9_MACS2_rendition_1E-8_downsampled_try3_peak_338	1340	42.3367	134.023	129.947	251
chr1	33799694	33800088	Project004-IPSHOCH-Exp5-ChIP-ES-2i-CTCF-IP-Blobel-Rep2-S1_S9_MACS2_rendition_1E-8_downsampled_try3_peak_339	1369	39.6069	136.98	132.854	196
chr1	33806026	33806247	Project004-IPSHOCH-Exp5-ChIP-ES-2i-CTCF-IP-Blobel-Rep2-S1_S9_MACS2_rendition_1E-8_downsampled_try3_peak_340	334	13.7838	33.4333	30.7802	111
chr1	33866955	33867197	Project004-IPSHOCH-Exp5-ChIP-ES-2i-CTCF-IP-Blobel-Rep2-S1_S9_MACS2_rendition_1E-8_downsampled_try3_peak_341	259	11.3258	25.9962	23.4471	122
chr1	33903740	33904031	Project004-IPSHOCH-Exp5-ChIP-ES-2i-CTCF-IP-Blobel-Rep2-S1_S9_MACS2_rendition_1E-8_downsampled_try3_peak_342	478	20.1413	47.8204	44.9817	141
chr1	33932580	33932908	Project004-IPSHOCH-Exp5-ChIP-ES-2i-CTCF-IP-Blobel-Rep2-S1_S9_MACS2_rendition_1E-8_downsampled_try3_peak_343	1167	34.8649	116.709	112.899	164
chr1	33940354	33940614	Project004-IPSHOCH-Exp5-ChIP-ES-2i-CTCF-IP-Blobel-Rep2-S1_S9_MACS2_rendition_1E-8_downsampled_try3_peak_344	429	14.375	42.9238	40.148	114
chr1	33940759	33940949	Project004-IPSHOCH-Exp5-ChIP-ES-2i-CTCF-IP-Blobel-Rep2-S1_S9_MACS2_rendition_1E-8_downsampled_try3_peak_345	186	9.92878	18.6815	16.2474	73
chr1	33949628	33949975	Project004-IPSHOCH-Exp5-ChIP-ES-2i-CTCF-IP-Blobel-Rep2-S1_S9_MACS2_rendition_1E-8_downsampled_try3_peak_346	739	16.9286	73.9462	70.766	149
chr1	33964306	33964661	Project004-IPSHOCH-Exp5-ChIP-ES-2i-CTCF-IP-Blobel-Rep2-S1_S9_MACS2_rendition_1E-8_downsampled_try3_peak_347	739	16.9286	73.9462	70.766	187
chr1	34000826	34001151	Project004-IPSHOCH-Exp5-ChIP-ES-2i-CTCF-IP-Blobel-Rep2-S1_S9_MACS2_rendition_1E-8_downsampled_try3_peak_348	885	28.0713	88.5204	85.1326	180
chr1	34004822	34005063	Project004-IPSHOCH-Exp5-ChIP-ES-2i-CTCF-IP-Blobel-Rep2-S1_S9_MACS2_rendition_1E-8_downsampled_try3_peak_349	137	6.10169	13.796	11.459	135
chr1	34021512	34021830	Project004-IPSHOCH-Exp5-ChIP-ES-2i-CTCF-IP-Blobel-Rep2-S1_S9_MACS2_rendition_1E-8_downsampled_try3_peak_350	386	11.9491	38.6933	35.9754	123
chr1	34023225	34023567	Project004-IPSHOCH-Exp5-ChIP-ES-2i-CTCF-IP-Blobel-Rep2-S1_S9_MACS2_rendition_1E-8_downsampled_try3_peak_351	840	27.1622	84.0452	80.719	149
chr1	34062457	34062803	Project004-IPSHOCH-Exp5-ChIP-ES-2i-CTCF-IP-Blobel-Rep2-S1_S9_MACS2_rendition_1E-8_downsampled_try3_peak_352	564	15.8451	56.405	53.4584	249
chr1	34067883	34068162	Project004-IPSHOCH-Exp5-ChIP-ES-2i-CTCF-IP-Blobel-Rep2-S1_S9_MACS2_rendition_1E-8_downsampled_try3_peak_353	394	15.2312	39.4324	36.6998	148
chr1	34106563	34106782	Project004-IPSHOCH-Exp5-ChIP-ES-2i-CTCF-IP-Blobel-Rep2-S1_S9_MACS2_rendition_1E-8_downsampled_try3_peak_354	191	9.32432	19.1965	16.7542	117
chr1	34118056	34118262	Project004-IPSHOCH-Exp5-ChIP-ES-2i-CTCF-IP-Blobel-Rep2-S1_S9_MACS2_rendition_1E-8_downsampled_try3_peak_355	470	14.9665	47.0111	44.1797	84
chr1	34121387	34121580	Project004-IPSHOCH-Exp5-ChIP-ES-2i-CTCF-IP-Blobel-Rep2-S1_S9_MACS2_rendition_1E-8_downsampled_try3_peak_356	217	9.89566	21.7865	19.3021	79
chr1	34125209	34125580	Project004-IPSHOCH-Exp5-ChIP-ES-2i-CTCF-IP-Blobel-Rep2-S1_S9_MACS2_rendition_1E-8_downsampled_try3_peak_357	1131	32.2905	113.129	109.381	160
chr1	34150541	34150836	Project004-IPSHOCH-Exp5-ChIP-ES-2i-CTCF-IP-Blobel-Rep2-S1_S9_MACS2_rendition_1E-8_downsampled_try3_peak_358	583	14.3571	58.3241	55.3511	144
chr1	34154540	34154724	Project004-IPSHOCH-Exp5-ChIP-ES-2i-CTCF-IP-Blobel-Rep2-S1_S9_MACS2_rendition_1E-8_downsampled_try3_peak_359	186	8.125	18.6213	16.1884	116
chr1	34174642	34174794	Project004-IPSHOCH-Exp5-ChIP-ES-2i-CTCF-IP-Blobel-Rep2-S1_S9_MACS2_rendition_1E-8_downsampled_try3_peak_360	145	7.7027	14.5288	12.1727	63
chr1	34221548	34221922	Project004-IPSHOCH-Exp5-ChIP-ES-2i-CTCF-IP-Blobel-Rep2-S1_S9_MACS2_rendition_1E-8_downsampled_try3_peak_361	827	22.915	82.7097	79.4047	145
chr1	34225387	34225628	Project004-IPSHOCH-Exp5-ChIP-ES-2i-CTCF-IP-Blobel-Rep2-S1_S9_MACS2_rendition_1E-8_downsampled_try3_peak_362	157	7.85928	15.7123	13.337	126
chr1	34231804	34232034	Project004-IPSHOCH-Exp5-ChIP-ES-2i-CTCF-IP-Blobel-Rep2-S1_S9_MACS2_rendition_1E-8_downsampled_try3_peak_363	216	10.1351	21.6442	19.1618	106
chr1	34246789	34247218	Project004-IPSHOCH-Exp5-ChIP-ES-2i-CTCF-IP-Blobel-Rep2-S1_S9_MACS2_rendition_1E-8_downsampled_try3_peak_364	1224	32.816	122.457	118.558	198
chr1	34258366	34258631	Project004-IPSHOCH-Exp5-ChIP-ES-2i-CTCF-IP-Blobel-Rep2-S1_S9_MACS2_rendition_1E-8_downsampled_try3_peak_365	562	22.3397	56.2303	53.2841	143
chr1	34275223	34275505	Project004-IPSHOCH-Exp5-ChIP-ES-2i-CTCF-IP-Blobel-Rep2-S1_S9_MACS2_rendition_1E-8_downsampled_try3_peak_366	875	19.0714	87.5719	84.1954	132
chr1	34347759	34347929	Project004-IPSHOCH-Exp5-ChIP-ES-2i-CTCF-IP-Blobel-Rep2-S1_S9_MACS2_rendition_1E-8_downsampled_try3_peak_367	140	7.42033	14.0555	11.7168	91
chr1	34466747	34467080	Project004-IPSHOCH-Exp5-ChIP-ES-2i-CTCF-IP-Blobel-Rep2-S1_S9_MACS2_rendition_1E-8_downsampled_try3_peak_368	433	18.8085	43.3621	40.5817	198
chr1	34519748	34519988	Project004-IPSHOCH-Exp5-ChIP-ES-2i-CTCF-IP-Blobel-Rep2-S1_S9_MACS2_rendition_1E-8_downsampled_try3_peak_369	589	22.0113	58.9675	55.9834	143
chr1	34528944	34529107	Project004-IPSHOCH-Exp5-ChIP-ES-2i-CTCF-IP-Blobel-Rep2-S1_S9_MACS2_rendition_1E-8_downsampled_try3_peak_370	191	9.32432	19.1965	16.7542	78
chr1	34542760	34543015	Project004-IPSHOCH-Exp5-ChIP-ES-2i-CTCF-IP-Blobel-Rep2-S1_S9_MACS2_rendition_1E-8_downsampled_try3_peak_371	681	20	68.1289	65.0212	141
chr1	34567967	34568281	Project004-IPSHOCH-Exp5-ChIP-ES-2i-CTCF-IP-Blobel-Rep2-S1_S9_MACS2_rendition_1E-8_downsampled_try3_peak_372	800	22.5	80.0747	76.8023	139
chr1	34575193	34575381	Project004-IPSHOCH-Exp5-ChIP-ES-2i-CTCF-IP-Blobel-Rep2-S1_S9_MACS2_rendition_1E-8_downsampled_try3_peak_373	170	9.50311	17.0487	14.6428	60
chr1	34598120	34598312	Project004-IPSHOCH-Exp5-ChIP-ES-2i-CTCF-IP-Blobel-Rep2-S1_S9_MACS2_rendition_1E-8_downsampled_try3_peak_374	234	11.2302	23.4888	20.9787	80
chr1	34640863	34641212	Project004-IPSHOCH-Exp5-ChIP-ES-2i-CTCF-IP-Blobel-Rep2-S1_S9_MACS2_rendition_1E-8_downsampled_try3_peak_375	224	11.6149	22.4912	19.9952	246
chr1	34659206	34659575	Project004-IPSHOCH-Exp5-ChIP-ES-2i-CTCF-IP-Blobel-Rep2-S1_S9_MACS2_rendition_1E-8_downsampled_try3_peak_376	1380	33.75	138.087	133.946	193
chr1	34699243	34699745	Project004-IPSHOCH-Exp5-ChIP-ES-2i-CTCF-IP-Blobel-Rep2-S1_S9_MACS2_rendition_1E-8_downsampled_try3_peak_377	958	22.6271	95.8821	92.3838	242
chr1	34757597	34757957	Project004-IPSHOCH-Exp5-ChIP-ES-2i-CTCF-IP-Blobel-Rep2-S1_S9_MACS2_rendition_1E-8_downsampled_try3_peak_378	796	22.772	79.6977	76.436	129
chr1	34795143	34795653	Project004-IPSHOCH-Exp5-ChIP-ES-2i-CTCF-IP-Blobel-Rep2-S1_S9_MACS2_rendition_1E-8_downsampled_try3_peak_379	1097	28.8659	109.751	106.046	241
chr1	34832503	34832655	Project004-IPSHOCH-Exp5-ChIP-ES-2i-CTCF-IP-Blobel-Rep2-S1_S9_MACS2_rendition_1E-8_downsampled_try3_peak_380	145	7.7027	14.5288	12.1727	63
chr1	34833363	34833557	Project004-IPSHOCH-Exp5-ChIP-ES-2i-CTCF-IP-Blobel-Rep2-S1_S9_MACS2_rendition_1E-8_downsampled_try3_peak_381	123	6.89189	12.3237	10.0212	119
chr1	34848685	34848898	Project004-IPSHOCH-Exp5-ChIP-ES-2i-CTCF-IP-Blobel-Rep2-S1_S9_MACS2_rendition_1E-8_downsampled_try3_peak_382	210	11.087	21.0994	18.6237	102
chr1	34855325	34855564	Project004-IPSHOCH-Exp5-ChIP-ES-2i-CTCF-IP-Blobel-Rep2-S1_S9_MACS2_rendition_1E-8_downsampled_try3_peak_383	174	9.48482	17.4721	15.0624	95
chr1	34869602	34869757	Project004-IPSHOCH-Exp5-ChIP-ES-2i-CTCF-IP-Blobel-Rep2-S1_S9_MACS2_rendition_1E-8_downsampled_try3_peak_384	169	9.45935	16.976	14.5765	79
chr1	34924045	34924505	Project004-IPSHOCH-Exp5-ChIP-ES-2i-CTCF-IP-Blobel-Rep2-S1_S9_MACS2_rendition_1E-8_downsampled_try3_peak_385	841	20.5932	84.165	80.8359	156
chr1	34948413	34948719	Project004-IPSHOCH-Exp5-ChIP-ES-2i-CTCF-IP-Blobel-Rep2-S1_S9_MACS2_rendition_1E-8_downsampled_try3_peak_386	614	21.4865	61.4404	58.4249	159
chr1	34950691	34950960	Project004-IPSHOCH-Exp5-ChIP-ES-2i-CTCF-IP-Blobel-Rep2-S1_S9_MACS2_rendition_1E-8_downsampled_try3_peak_387	253	10	25.3882	22.8479	129
chr1	34953870	34954120	Project004-IPSHOCH-Exp5-ChIP-ES-2i-CTCF-IP-Blobel-Rep2-S1_S9_MACS2_rendition_1E-8_downsampled_try3_peak_388	297	14.2547	29.7236	27.1208	76
chr1	34968947	34969154	Project004-IPSHOCH-Exp5-ChIP-ES-2i-CTCF-IP-Blobel-Rep2-S1_S9_MACS2_rendition_1E-8_downsampled_try3_peak_389	265	11.9781	26.5074	23.9555	123
chr1	35018542	35018694	Project004-IPSHOCH-Exp5-ChIP-ES-2i-CTCF-IP-Blobel-Rep2-S1_S9_MACS2_rendition_1E-8_downsampled_try3_peak_390	144	8.44721	14.4632	12.1115	42
chr1	35045155	35045386	Project004-IPSHOCH-Exp5-ChIP-ES-2i-CTCF-IP-Blobel-Rep2-S1_S9_MACS2_rendition_1E-8_downsampled_try3_peak_391	186	8.125	18.6213	16.1884	133
chr1	35089515	35089745	Project004-IPSHOCH-Exp5-ChIP-ES-2i-CTCF-IP-Blobel-Rep2-S1_S9_MACS2_rendition_1E-8_downsampled_try3_peak_392	416	14.0625	41.603	38.8452	121
chr1	35112805	35113004	Project004-IPSHOCH-Exp5-ChIP-ES-2i-CTCF-IP-Blobel-Rep2-S1_S9_MACS2_rendition_1E-8_downsampled_try3_peak_393	170	9.50311	17.0487	14.6428	70
chr1	35323562	35323814	Project004-IPSHOCH-Exp5-ChIP-ES-2i-CTCF-IP-Blobel-Rep2-S1_S9_MACS2_rendition_1E-8_downsampled_try3_peak_394	453	19.5342	45.3151	42.5059	127
chr1	35442245	35442655	Project004-IPSHOCH-Exp5-ChIP-ES-2i-CTCF-IP-Blobel-Rep2-S1_S9_MACS2_rendition_1E-8_downsampled_try3_peak_395	1484	41.0071	148.412	144.108	184
chr1	35445026	35445404	Project004-IPSHOCH-Exp5-ChIP-ES-2i-CTCF-IP-Blobel-Rep2-S1_S9_MACS2_rendition_1E-8_downsampled_try3_peak_396	857	27.5676	85.7116	82.3607	168
chr1	35449329	35449525	Project004-IPSHOCH-Exp5-ChIP-ES-2i-CTCF-IP-Blobel-Rep2-S1_S9_MACS2_rendition_1E-8_downsampled_try3_peak_397	164	7.5	16.4902	14.0994	90
chr1	35521999	35522249	Project004-IPSHOCH-Exp5-ChIP-ES-2i-CTCF-IP-Blobel-Rep2-S1_S9_MACS2_rendition_1E-8_downsampled_try3_peak_398	357	16.3665	35.7978	33.1142	129
chr1	35535170	35535490	Project004-IPSHOCH-Exp5-ChIP-ES-2i-CTCF-IP-Blobel-Rep2-S1_S9_MACS2_rendition_1E-8_downsampled_try3_peak_399	507	18.6486	50.7125	47.8363	133
chr1	35772806	35773180	Project004-IPSHOCH-Exp5-ChIP-ES-2i-CTCF-IP-Blobel-Rep2-S1_S9_MACS2_rendition_1E-8_downsampled_try3_peak_400	758	25.1351	75.8121	72.599	232
chr1	35783514	35783775	Project004-IPSHOCH-Exp5-ChIP-ES-2i-CTCF-IP-Blobel-Rep2-S1_S9_MACS2_rendition_1E-8_downsampled_try3_peak_401	1164	29.6875	116.429	112.625	134
chr1	35822518	35822726	Project004-IPSHOCH-Exp5-ChIP-ES-2i-CTCF-IP-Blobel-Rep2-S1_S9_MACS2_rendition_1E-8_downsampled_try3_peak_402	392	15.5161	39.2101	36.4785	99
chr1	35896300	35896735	Project004-IPSHOCH-Exp5-ChIP-ES-2i-CTCF-IP-Blobel-Rep2-S1_S9_MACS2_rendition_1E-8_downsampled_try3_peak_403	1573	39.7246	157.359	152.923	176
chr1	35903411	35903792	Project004-IPSHOCH-Exp5-ChIP-ES-2i-CTCF-IP-Blobel-Rep2-S1_S9_MACS2_rendition_1E-8_downsampled_try3_peak_404	872	27.338	87.2173	83.8483	157
chr1	36037616	36037769	Project004-IPSHOCH-Exp5-ChIP-ES-2i-CTCF-IP-Blobel-Rep2-S1_S9_MACS2_rendition_1E-8_downsampled_try3_peak_405	143	7.88828	14.3917	12.0489	25
chr1	36067084	36067360	Project004-IPSHOCH-Exp5-ChIP-ES-2i-CTCF-IP-Blobel-Rep2-S1_S9_MACS2_rendition_1E-8_downsampled_try3_peak_406	547	19.5624	54.7279	51.8012	115
chr1	36121766	36122067	Project004-IPSHOCH-Exp5-ChIP-ES-2i-CTCF-IP-Blobel-Rep2-S1_S9_MACS2_rendition_1E-8_downsampled_try3_peak_407	1388	37.0042	138.883	134.728	170
chr1	36163918	36164155	Project004-IPSHOCH-Exp5-ChIP-ES-2i-CTCF-IP-Blobel-Rep2-S1_S9_MACS2_rendition_1E-8_downsampled_try3_peak_408	108	5.77318	10.8089	8.54325	63
chr1	36191497	36191789	Project004-IPSHOCH-Exp5-ChIP-ES-2i-CTCF-IP-Blobel-Rep2-S1_S9_MACS2_rendition_1E-8_downsampled_try3_peak_409	1609	48.131	160.935	156.449	154
chr1	36201931	36202330	Project004-IPSHOCH-Exp5-ChIP-ES-2i-CTCF-IP-Blobel-Rep2-S1_S9_MACS2_rendition_1E-8_downsampled_try3_peak_410	550	21.6219	55.0108	52.0828	159
chr1	36206320	36206592	Project004-IPSHOCH-Exp5-ChIP-ES-2i-CTCF-IP-Blobel-Rep2-S1_S9_MACS2_rendition_1E-8_downsampled_try3_peak_411	600	20.2096	60.0213	57.0244	132
chr1	36309687	36310147	Project004-IPSHOCH-Exp5-ChIP-ES-2i-CTCF-IP-Blobel-Rep2-S1_S9_MACS2_rendition_1E-8_downsampled_try3_peak_412	1060	21.8571	106.004	102.359	186
chr1	36311478	36311863	Project004-IPSHOCH-Exp5-ChIP-ES-2i-CTCF-IP-Blobel-Rep2-S1_S9_MACS2_rendition_1E-8_downsampled_try3_peak_413	870	21.1017	87.0636	83.6956	189
chr1	36313106	36313400	Project004-IPSHOCH-Exp5-ChIP-ES-2i-CTCF-IP-Blobel-Rep2-S1_S9_MACS2_rendition_1E-8_downsampled_try3_peak_414	436	11.7857	43.6318	40.8462	203
chr1	36326008	36326196	Project004-IPSHOCH-Exp5-ChIP-ES-2i-CTCF-IP-Blobel-Rep2-S1_S9_MACS2_rendition_1E-8_downsampled_try3_peak_415	200	9.83915	20.0631	17.6067	148
chr1	36334097	36334552	Project004-IPSHOCH-Exp5-ChIP-ES-2i-CTCF-IP-Blobel-Rep2-S1_S9_MACS2_rendition_1E-8_downsampled_try3_peak_416	1217	26.9491	121.781	117.893	212
chr1	36336067	36336433	Project004-IPSHOCH-Exp5-ChIP-ES-2i-CTCF-IP-Blobel-Rep2-S1_S9_MACS2_rendition_1E-8_downsampled_try3_peak_417	1268	40.6683	126.808	122.841	161
chr1	36367529	36367700	Project004-IPSHOCH-Exp5-ChIP-ES-2i-CTCF-IP-Blobel-Rep2-S1_S9_MACS2_rendition_1E-8_downsampled_try3_peak_418	173	8.26308	17.3745	14.9667	63
chr1	36378650	36378957	Project004-IPSHOCH-Exp5-ChIP-ES-2i-CTCF-IP-Blobel-Rep2-S1_S9_MACS2_rendition_1E-8_downsampled_try3_peak_419	448	12	44.8162	42.0166	151
chr1	36380892	36381202	Project004-IPSHOCH-Exp5-ChIP-ES-2i-CTCF-IP-Blobel-Rep2-S1_S9_MACS2_rendition_1E-8_downsampled_try3_peak_420	666	19.6875	66.6649	63.5776	186
chr1	36511343	36511597	Project004-IPSHOCH-Exp5-ChIP-ES-2i-CTCF-IP-Blobel-Rep2-S1_S9_MACS2_rendition_1E-8_downsampled_try3_peak_421	448	12	44.8162	42.0166	111
chr1	36528554	36528725	Project004-IPSHOCH-Exp5-ChIP-ES-2i-CTCF-IP-Blobel-Rep2-S1_S9_MACS2_rendition_1E-8_downsampled_try3_peak_422	307	12.973	30.7148	28.099	61
chr1	36549368	36549536	Project004-IPSHOCH-Exp5-ChIP-ES-2i-CTCF-IP-Blobel-Rep2-S1_S9_MACS2_rendition_1E-8_downsampled_try3_peak_423	219	9.0625	21.9387	19.4506	108
chr1	36553696	36553942	Project004-IPSHOCH-Exp5-ChIP-ES-2i-CTCF-IP-Blobel-Rep2-S1_S9_MACS2_rendition_1E-8_downsampled_try3_peak_424	320	14.1379	32.0441	29.4132	85
chr1	36558135	36558502	Project004-IPSHOCH-Exp5-ChIP-ES-2i-CTCF-IP-Blobel-Rep2-S1_S9_MACS2_rendition_1E-8_downsampled_try3_peak_425	1380	33.75	138.087	133.946	206
chr1	36568122	36568550	Project004-IPSHOCH-Exp5-ChIP-ES-2i-CTCF-IP-Blobel-Rep2-S1_S9_MACS2_rendition_1E-8_downsampled_try3_peak_426	1301	35.2079	130.117	126.098	215
chr1	36570601	36570915	Project004-IPSHOCH-Exp5-ChIP-ES-2i-CTCF-IP-Blobel-Rep2-S1_S9_MACS2_rendition_1E-8_downsampled_try3_peak_427	533	13.5	53.3149	50.4072	141
chr1	36602675	36603071	Project004-IPSHOCH-Exp5-ChIP-ES-2i-CTCF-IP-Blobel-Rep2-S1_S9_MACS2_rendition_1E-8_downsampled_try3_peak_428	915	31.5174	91.5954	88.1625	185
chr1	36603926	36604445	Project004-IPSHOCH-Exp5-ChIP-ES-2i-CTCF-IP-Blobel-Rep2-S1_S9_MACS2_rendition_1E-8_downsampled_try3_peak_429	1833	41.875	183.363	178.572	287
chr1	36613918	36614316	Project004-IPSHOCH-Exp5-ChIP-ES-2i-CTCF-IP-Blobel-Rep2-S1_S9_MACS2_rendition_1E-8_downsampled_try3_peak_430	1709	44.5359	170.901	166.275	194
chr1	36691801	36692146	Project004-IPSHOCH-Exp5-ChIP-ES-2i-CTCF-IP-Blobel-Rep2-S1_S9_MACS2_rendition_1E-8_downsampled_try3_peak_431	1443	41.2402	144.327	140.087	189
chr1	36721389	36721579	Project004-IPSHOCH-Exp5-ChIP-ES-2i-CTCF-IP-Blobel-Rep2-S1_S9_MACS2_rendition_1E-8_downsampled_try3_peak_432	236	11.6565	23.637	21.1265	126
chr1	36734979	36735167	Project004-IPSHOCH-Exp5-ChIP-ES-2i-CTCF-IP-Blobel-Rep2-S1_S9_MACS2_rendition_1E-8_downsampled_try3_peak_433	244	10.4187	24.4078	21.8813	102
chr1	36740915	36741355	Project004-IPSHOCH-Exp5-ChIP-ES-2i-CTCF-IP-Blobel-Rep2-S1_S9_MACS2_rendition_1E-8_downsampled_try3_peak_434	1449	35.6013	144.983	140.732	219
chr1	36766138	36766373	Project004-IPSHOCH-Exp5-ChIP-ES-2i-CTCF-IP-Blobel-Rep2-S1_S9_MACS2_rendition_1E-8_downsampled_try3_peak_435	278	10.9766	27.8039	25.2314	140
chr1	36792965	36793118	Project004-IPSHOCH-Exp5-ChIP-ES-2i-CTCF-IP-Blobel-Rep2-S1_S9_MACS2_rendition_1E-8_downsampled_try3_peak_436	179	8.91892	17.9999	15.579	93
chr1	36794143	36794552	Project004-IPSHOCH-Exp5-ChIP-ES-2i-CTCF-IP-Blobel-Rep2-S1_S9_MACS2_rendition_1E-8_downsampled_try3_peak_437	1114	39.0683	111.499	107.77	190
chr1	36801399	36801796	Project004-IPSHOCH-Exp5-ChIP-ES-2i-CTCF-IP-Blobel-Rep2-S1_S9_MACS2_rendition_1E-8_downsampled_try3_peak_438	987	26.25	98.7009	95.1647	233
chr1	36803329	36803678	Project004-IPSHOCH-Exp5-ChIP-ES-2i-CTCF-IP-Blobel-Rep2-S1_S9_MACS2_rendition_1E-8_downsampled_try3_peak_439	1246	31.25	124.674	120.741	166
chr1	36815475	36815688	Project004-IPSHOCH-Exp5-ChIP-ES-2i-CTCF-IP-Blobel-Rep2-S1_S9_MACS2_rendition_1E-8_downsampled_try3_peak_440	319	12.5742	31.9725	29.3418	127
chr1	36841383	36841895	Project004-IPSHOCH-Exp5-ChIP-ES-2i-CTCF-IP-Blobel-Rep2-S1_S9_MACS2_rendition_1E-8_downsampled_try3_peak_441	1003	23.3898	100.358	96.7939	280
chr1	36842296	36842454	Project004-IPSHOCH-Exp5-ChIP-ES-2i-CTCF-IP-Blobel-Rep2-S1_S9_MACS2_rendition_1E-8_downsampled_try3_peak_442	134	6.5625	13.4274	11.0962	32
chr1	36843261	36843593	Project004-IPSHOCH-Exp5-ChIP-ES-2i-CTCF-IP-Blobel-Rep2-S1_S9_MACS2_rendition_1E-8_downsampled_try3_peak_443	725	20.9375	72.5608	69.3988	146
chr1	36843808	36843978	Project004-IPSHOCH-Exp5-ChIP-ES-2i-CTCF-IP-Blobel-Rep2-S1_S9_MACS2_rendition_1E-8_downsampled_try3_peak_444	168	9.12923	16.8862	14.4876	103
chr1	36862413	36862573	Project004-IPSHOCH-Exp5-ChIP-ES-2i-CTCF-IP-Blobel-Rep2-S1_S9_MACS2_rendition_1E-8_downsampled_try3_peak_445	186	7.37288	18.6225	16.1885	34
chr1	36878790	36879027	Project004-IPSHOCH-Exp5-ChIP-ES-2i-CTCF-IP-Blobel-Rep2-S1_S9_MACS2_rendition_1E-8_downsampled_try3_peak_446	186	7.37288	18.6225	16.1885	112
chr1	36881617	36881830	Project004-IPSHOCH-Exp5-ChIP-ES-2i-CTCF-IP-Blobel-Rep2-S1_S9_MACS2_rendition_1E-8_downsampled_try3_peak_447	236	10.9657	23.6152	21.1048	145
chr1	36904863	36905242	Project004-IPSHOCH-Exp5-ChIP-ES-2i-CTCF-IP-Blobel-Rep2-S1_S9_MACS2_rendition_1E-8_downsampled_try3_peak_448	552	19.8649	55.2579	52.3185	223
chr1	36961027	36961207	Project004-IPSHOCH-Exp5-ChIP-ES-2i-CTCF-IP-Blobel-Rep2-S1_S9_MACS2_rendition_1E-8_downsampled_try3_peak_449	242	9.6875	24.2245	21.699	67
chr1	36990005	36990227	Project004-IPSHOCH-Exp5-ChIP-ES-2i-CTCF-IP-Blobel-Rep2-S1_S9_MACS2_rendition_1E-8_downsampled_try3_peak_450	300	12.6072	30.0828	27.4766	110
chr1	37091411	37091614	Project004-IPSHOCH-Exp5-ChIP-ES-2i-CTCF-IP-Blobel-Rep2-S1_S9_MACS2_rendition_1E-8_downsampled_try3_peak_451	129	7.27242	12.951	10.6377	54
chr1	37097503	37097703	Project004-IPSHOCH-Exp5-ChIP-ES-2i-CTCF-IP-Blobel-Rep2-S1_S9_MACS2_rendition_1E-8_downsampled_try3_peak_452	114	5.9375	11.4842	9.20227	110
chr1	37167762	37167999	Project004-IPSHOCH-Exp5-ChIP-ES-2i-CTCF-IP-Blobel-Rep2-S1_S9_MACS2_rendition_1E-8_downsampled_try3_peak_453	196	7.62712	19.6337	17.1877	127
chr1	37189361	37189645	Project004-IPSHOCH-Exp5-ChIP-ES-2i-CTCF-IP-Blobel-Rep2-S1_S9_MACS2_rendition_1E-8_downsampled_try3_peak_454	265	10.3125	26.5652	24.0109	127
chr1	37208884	37209043	Project004-IPSHOCH-Exp5-ChIP-ES-2i-CTCF-IP-Blobel-Rep2-S1_S9_MACS2_rendition_1E-8_downsampled_try3_peak_455	154	7.1875	15.4506	13.0818	70
chr1	37251458	37251741	Project004-IPSHOCH-Exp5-ChIP-ES-2i-CTCF-IP-Blobel-Rep2-S1_S9_MACS2_rendition_1E-8_downsampled_try3_peak_456	580	17.8125	58.0283	55.0577	142
chr1	37268748	37268901	Project004-IPSHOCH-Exp5-ChIP-ES-2i-CTCF-IP-Blobel-Rep2-S1_S9_MACS2_rendition_1E-8_downsampled_try3_peak_457	218	10.934	21.8874	19.4015	87
chr1	37293102	37293440	Project004-IPSHOCH-Exp5-ChIP-ES-2i-CTCF-IP-Blobel-Rep2-S1_S9_MACS2_rendition_1E-8_downsampled_try3_peak_458	101	4.71429	10.1544	7.91512	34
chr1	37307487	37307999	Project004-IPSHOCH-Exp5-ChIP-ES-2i-CTCF-IP-Blobel-Rep2-S1_S9_MACS2_rendition_1E-8_downsampled_try3_peak_459	1061	32.4324	106.177	102.528	213
chr1	37315388	37315606	Project004-IPSHOCH-Exp5-ChIP-ES-2i-CTCF-IP-Blobel-Rep2-S1_S9_MACS2_rendition_1E-8_downsampled_try3_peak_460	325	13.2785	32.5568	29.9198	120
chr1	37329294	37329699	Project004-IPSHOCH-Exp5-ChIP-ES-2i-CTCF-IP-Blobel-Rep2-S1_S9_MACS2_rendition_1E-8_downsampled_try3_peak_461	1069	37.617	106.989	103.328	219
chr1	37329955	37330169	Project004-IPSHOCH-Exp5-ChIP-ES-2i-CTCF-IP-Blobel-Rep2-S1_S9_MACS2_rendition_1E-8_downsampled_try3_peak_462	204	10.4035	20.4761	18.0129	122
chr1	37458566	37458889	Project004-IPSHOCH-Exp5-ChIP-ES-2i-CTCF-IP-Blobel-Rep2-S1_S9_MACS2_rendition_1E-8_downsampled_try3_peak_463	726	16.7143	72.6126	69.4423	150
chr1	37476213	37476774	Project004-IPSHOCH-Exp5-ChIP-ES-2i-CTCF-IP-Blobel-Rep2-S1_S9_MACS2_rendition_1E-8_downsampled_try3_peak_464	2859	59.0625	285.94	279.853	256
chr1	37505212	37505573	Project004-IPSHOCH-Exp5-ChIP-ES-2i-CTCF-IP-Blobel-Rep2-S1_S9_MACS2_rendition_1E-8_downsampled_try3_peak_465	1096	33.2432	109.667	105.964	188
chr1	37523539	37523720	Project004-IPSHOCH-Exp5-ChIP-ES-2i-CTCF-IP-Blobel-Rep2-S1_S9_MACS2_rendition_1E-8_downsampled_try3_peak_466	179	8.91892	17.9999	15.579	95
chr1	37536005	37536224	Project004-IPSHOCH-Exp5-ChIP-ES-2i-CTCF-IP-Blobel-Rep2-S1_S9_MACS2_rendition_1E-8_downsampled_try3_peak_467	267	13.1988	26.7789	24.2164	78
chr1	37595606	37595860	Project004-IPSHOCH-Exp5-ChIP-ES-2i-CTCF-IP-Blobel-Rep2-S1_S9_MACS2_rendition_1E-8_downsampled_try3_peak_468	274	12.5152	27.4135	24.8451	131
chr1	37691466	37691858	Project004-IPSHOCH-Exp5-ChIP-ES-2i-CTCF-IP-Blobel-Rep2-S1_S9_MACS2_rendition_1E-8_downsampled_try3_peak_469	924	29.1892	92.4393	88.9923	228
chr1	37692657	37692841	Project004-IPSHOCH-Exp5-ChIP-ES-2i-CTCF-IP-Blobel-Rep2-S1_S9_MACS2_rendition_1E-8_downsampled_try3_peak_470	134	7.2973	13.4146	11.0861	85
chr1	37693173	37693341	Project004-IPSHOCH-Exp5-ChIP-ES-2i-CTCF-IP-Blobel-Rep2-S1_S9_MACS2_rendition_1E-8_downsampled_try3_peak_471	253	12.6708	25.3317	22.7939	77
chr1	37696037	37696433	Project004-IPSHOCH-Exp5-ChIP-ES-2i-CTCF-IP-Blobel-Rep2-S1_S9_MACS2_rendition_1E-8_downsampled_try3_peak_472	848	18.6429	84.8061	81.4686	182
chr1	37698859	37699096	Project004-IPSHOCH-Exp5-ChIP-ES-2i-CTCF-IP-Blobel-Rep2-S1_S9_MACS2_rendition_1E-8_downsampled_try3_peak_473	265	10.3125	26.5652	24.0109	116
chr1	37710922	37711244	Project004-IPSHOCH-Exp5-ChIP-ES-2i-CTCF-IP-Blobel-Rep2-S1_S9_MACS2_rendition_1E-8_downsampled_try3_peak_474	774	24.9948	77.4011	74.1699	129
chr1	37711538	37711696	Project004-IPSHOCH-Exp5-ChIP-ES-2i-CTCF-IP-Blobel-Rep2-S1_S9_MACS2_rendition_1E-8_downsampled_try3_peak_475	247	10.9352	24.7263	22.1977	75
chr1	37732281	37732594	Project004-IPSHOCH-Exp5-ChIP-ES-2i-CTCF-IP-Blobel-Rep2-S1_S9_MACS2_rendition_1E-8_downsampled_try3_peak_476	549	22.0878	54.9982	52.0702	195
chr1	37735251	37735599	Project004-IPSHOCH-Exp5-ChIP-ES-2i-CTCF-IP-Blobel-Rep2-S1_S9_MACS2_rendition_1E-8_downsampled_try3_peak_477	1089	22.2857	108.906	105.217	169
chr1	37747563	37747812	Project004-IPSHOCH-Exp5-ChIP-ES-2i-CTCF-IP-Blobel-Rep2-S1_S9_MACS2_rendition_1E-8_downsampled_try3_peak_478	404	16.256	40.4839	37.7383	146
chr1	37762028	37762279	Project004-IPSHOCH-Exp5-ChIP-ES-2i-CTCF-IP-Blobel-Rep2-S1_S9_MACS2_rendition_1E-8_downsampled_try3_peak_479	327	15.3106	32.7313	30.0878	137
chr1	37765188	37765472	Project004-IPSHOCH-Exp5-ChIP-ES-2i-CTCF-IP-Blobel-Rep2-S1_S9_MACS2_rendition_1E-8_downsampled_try3_peak_480	327	15.3106	32.7313	30.0878	118
chr1	37776563	37776991	Project004-IPSHOCH-Exp5-ChIP-ES-2i-CTCF-IP-Blobel-Rep2-S1_S9_MACS2_rendition_1E-8_downsampled_try3_peak_481	447	17.027	44.7837	41.9846	220
chr1	37923941	37924325	Project004-IPSHOCH-Exp5-ChIP-ES-2i-CTCF-IP-Blobel-Rep2-S1_S9_MACS2_rendition_1E-8_downsampled_try3_peak_482	1115	28.75	111.537	107.804	184
chr1	37948259	37948559	Project004-IPSHOCH-Exp5-ChIP-ES-2i-CTCF-IP-Blobel-Rep2-S1_S9_MACS2_rendition_1E-8_downsampled_try3_peak_483	394	17.3592	39.4986	36.7658	141
chr1	37960057	37960332	Project004-IPSHOCH-Exp5-ChIP-ES-2i-CTCF-IP-Blobel-Rep2-S1_S9_MACS2_rendition_1E-8_downsampled_try3_peak_484	450	18.9697	45.0902	42.2861	124
chr1	37961564	37961770	Project004-IPSHOCH-Exp5-ChIP-ES-2i-CTCF-IP-Blobel-Rep2-S1_S9_MACS2_rendition_1E-8_downsampled_try3_peak_485	213	10.2669	21.318	18.841	103
chr1	37988736	37988985	Project004-IPSHOCH-Exp5-ChIP-ES-2i-CTCF-IP-Blobel-Rep2-S1_S9_MACS2_rendition_1E-8_downsampled_try3_peak_486	313	11.5625	31.3987	28.7727	111
chr1	38022447	38022690	Project004-IPSHOCH-Exp5-ChIP-ES-2i-CTCF-IP-Blobel-Rep2-S1_S9_MACS2_rendition_1E-8_downsampled_try3_peak_487	254	11.3514	25.4413	22.8977	136
chr1	38025171	38025340	Project004-IPSHOCH-Exp5-ChIP-ES-2i-CTCF-IP-Blobel-Rep2-S1_S9_MACS2_rendition_1E-8_downsampled_try3_peak_488	170	9.50311	17.0487	14.6428	79
chr1	38030394	38030568	Project004-IPSHOCH-Exp5-ChIP-ES-2i-CTCF-IP-Blobel-Rep2-S1_S9_MACS2_rendition_1E-8_downsampled_try3_peak_489	197	10.559	19.7277	17.2736	91
chr1	38042600	38042987	Project004-IPSHOCH-Exp5-ChIP-ES-2i-CTCF-IP-Blobel-Rep2-S1_S9_MACS2_rendition_1E-8_downsampled_try3_peak_490	1783	50.0513	178.395	173.667	220
chr1	38054688	38055024	Project004-IPSHOCH-Exp5-ChIP-ES-2i-CTCF-IP-Blobel-Rep2-S1_S9_MACS2_rendition_1E-8_downsampled_try3_peak_491	745	18.9835	74.5643	71.3682	148
chr1	38089938	38090100	Project004-IPSHOCH-Exp5-ChIP-ES-2i-CTCF-IP-Blobel-Rep2-S1_S9_MACS2_rendition_1E-8_downsampled_try3_peak_492	156	8.10811	15.6651	13.2917	65
chr1	38109064	38109216	Project004-IPSHOCH-Exp5-ChIP-ES-2i-CTCF-IP-Blobel-Rep2-S1_S9_MACS2_rendition_1E-8_downsampled_try3_peak_493	102	6.35255	10.2991	8.04999	101
chr1	38186789	38187149	Project004-IPSHOCH-Exp5-ChIP-ES-2i-CTCF-IP-Blobel-Rep2-S1_S9_MACS2_rendition_1E-8_downsampled_try3_peak_494	982	32.5058	98.2182	94.6888	184
chr1	38242300	38242728	Project004-IPSHOCH-Exp5-ChIP-ES-2i-CTCF-IP-Blobel-Rep2-S1_S9_MACS2_rendition_1E-8_downsampled_try3_peak_495	1050	27.5	105.08	101.445	243
chr1	38259677	38259961	Project004-IPSHOCH-Exp5-ChIP-ES-2i-CTCF-IP-Blobel-Rep2-S1_S9_MACS2_rendition_1E-8_downsampled_try3_peak_496	661	22.7027	66.1629	63.0818	150
chr1	38309499	38309913	Project004-IPSHOCH-Exp5-ChIP-ES-2i-CTCF-IP-Blobel-Rep2-S1_S9_MACS2_rendition_1E-8_downsampled_try3_peak_497	1009	31.2162	100.983	97.4101	219
chr1	38364176	38364387	Project004-IPSHOCH-Exp5-ChIP-ES-2i-CTCF-IP-Blobel-Rep2-S1_S9_MACS2_rendition_1E-8_downsampled_try3_peak_498	265	10.3125	26.5652	24.0109	60
chr1	38449817	38450109	Project004-IPSHOCH-Exp5-ChIP-ES-2i-CTCF-IP-Blobel-Rep2-S1_S9_MACS2_rendition_1E-8_downsampled_try3_peak_499	298	13.9776	29.8657	27.2618	134
chr1	38696564	38696842	Project004-IPSHOCH-Exp5-ChIP-ES-2i-CTCF-IP-Blobel-Rep2-S1_S9_MACS2_rendition_1E-8_downsampled_try3_peak_500	374	11.6949	37.4879	34.7824	131
chr1	38711900	38712160	Project004-IPSHOCH-Exp5-ChIP-ES-2i-CTCF-IP-Blobel-Rep2-S1_S9_MACS2_rendition_1E-8_downsampled_try3_peak_501	389	17.4224	38.9194	36.1955	85
chr1	38777127	38777461	Project004-IPSHOCH-Exp5-ChIP-ES-2i-CTCF-IP-Blobel-Rep2-S1_S9_MACS2_rendition_1E-8_downsampled_try3_peak_502	693	23.5135	69.35	66.2263	209
chr1	38824700	38825058	Project004-IPSHOCH-Exp5-ChIP-ES-2i-CTCF-IP-Blobel-Rep2-S1_S9_MACS2_rendition_1E-8_downsampled_try3_peak_503	617	13.7037	61.7887	58.7693	197
chr1	38826758	38827058	Project004-IPSHOCH-Exp5-ChIP-ES-2i-CTCF-IP-Blobel-Rep2-S1_S9_MACS2_rendition_1E-8_downsampled_try3_peak_504	861	23.75	86.1941	82.8353	160
chr1	38835260	38835412	Project004-IPSHOCH-Exp5-ChIP-ES-2i-CTCF-IP-Blobel-Rep2-S1_S9_MACS2_rendition_1E-8_downsampled_try3_peak_505	157	8.97516	15.7436	13.3619	83
chr1	38844328	38844635	Project004-IPSHOCH-Exp5-ChIP-ES-2i-CTCF-IP-Blobel-Rep2-S1_S9_MACS2_rendition_1E-8_downsampled_try3_peak_506	858	30.9505	85.8406	82.4881	167
chr1	38845791	38846126	Project004-IPSHOCH-Exp5-ChIP-ES-2i-CTCF-IP-Blobel-Rep2-S1_S9_MACS2_rendition_1E-8_downsampled_try3_peak_507	617	13.7037	61.7887	58.7693	184
chr1	38856260	38856584	Project004-IPSHOCH-Exp5-ChIP-ES-2i-CTCF-IP-Blobel-Rep2-S1_S9_MACS2_rendition_1E-8_downsampled_try3_peak_508	1602	50.4193	160.266	155.794	144
chr1	38891730	38892085	Project004-IPSHOCH-Exp5-ChIP-ES-2i-CTCF-IP-Blobel-Rep2-S1_S9_MACS2_rendition_1E-8_downsampled_try3_peak_509	552	19.8649	55.2579	52.3185	191
chr1	38913013	38913435	Project004-IPSHOCH-Exp5-ChIP-ES-2i-CTCF-IP-Blobel-Rep2-S1_S9_MACS2_rendition_1E-8_downsampled_try3_peak_510	1389	46.4596	138.929	134.772	218
chr1	38919034	38919433	Project004-IPSHOCH-Exp5-ChIP-ES-2i-CTCF-IP-Blobel-Rep2-S1_S9_MACS2_rendition_1E-8_downsampled_try3_peak_511	877	24.0625	87.7384	84.3566	207
chr1	38991543	38991898	Project004-IPSHOCH-Exp5-ChIP-ES-2i-CTCF-IP-Blobel-Rep2-S1_S9_MACS2_rendition_1E-8_downsampled_try3_peak_512	901	31.2106	90.1011	86.6897	205
chr1	38993648	38994014	Project004-IPSHOCH-Exp5-ChIP-ES-2i-CTCF-IP-Blobel-Rep2-S1_S9_MACS2_rendition_1E-8_downsampled_try3_peak_513	1124	25.4237	112.495	108.751	195
chr1	39057945	39058392	Project004-IPSHOCH-Exp5-ChIP-ES-2i-CTCF-IP-Blobel-Rep2-S1_S9_MACS2_rendition_1E-8_downsampled_try3_peak_514	723	27.8525	72.3673	69.2095	190
chr1	39067557	39067875	Project004-IPSHOCH-Exp5-ChIP-ES-2i-CTCF-IP-Blobel-Rep2-S1_S9_MACS2_rendition_1E-8_downsampled_try3_peak_515	594	18.125	59.4496	56.4592	136
chr1	39150929	39151107	Project004-IPSHOCH-Exp5-ChIP-ES-2i-CTCF-IP-Blobel-Rep2-S1_S9_MACS2_rendition_1E-8_downsampled_try3_peak_516	197	8.4375	19.7116	17.2628	107
chr1	39190550	39190751	Project004-IPSHOCH-Exp5-ChIP-ES-2i-CTCF-IP-Blobel-Rep2-S1_S9_MACS2_rendition_1E-8_downsampled_try3_peak_517	267	13.1988	26.7789	24.2164	127
chr1	39237470	39237686	Project004-IPSHOCH-Exp5-ChIP-ES-2i-CTCF-IP-Blobel-Rep2-S1_S9_MACS2_rendition_1E-8_downsampled_try3_peak_518	154	8.77954	15.4204	13.0539	90
chr1	39253567	39253745	Project004-IPSHOCH-Exp5-ChIP-ES-2i-CTCF-IP-Blobel-Rep2-S1_S9_MACS2_rendition_1E-8_downsampled_try3_peak_519	254	11.3514	25.4413	22.8977	94
chr1	39263825	39264113	Project004-IPSHOCH-Exp5-ChIP-ES-2i-CTCF-IP-Blobel-Rep2-S1_S9_MACS2_rendition_1E-8_downsampled_try3_peak_520	598	21.0811	59.8822	56.8861	143
chr1	39267860	39268062	Project004-IPSHOCH-Exp5-ChIP-ES-2i-CTCF-IP-Blobel-Rep2-S1_S9_MACS2_rendition_1E-8_downsampled_try3_peak_521	357	15.9744	35.7981	33.1142	127
chr1	39274449	39274731	Project004-IPSHOCH-Exp5-ChIP-ES-2i-CTCF-IP-Blobel-Rep2-S1_S9_MACS2_rendition_1E-8_downsampled_try3_peak_522	849	28.2341	84.9705	81.6315	142
chr1	39284609	39284823	Project004-IPSHOCH-Exp5-ChIP-ES-2i-CTCF-IP-Blobel-Rep2-S1_S9_MACS2_rendition_1E-8_downsampled_try3_peak_523	312	14.7826	31.2198	28.5969	116
chr1	39286895	39287231	Project004-IPSHOCH-Exp5-ChIP-ES-2i-CTCF-IP-Blobel-Rep2-S1_S9_MACS2_rendition_1E-8_downsampled_try3_peak_524	502	21.118	50.2346	47.3624	196
chr1	39310675	39310928	Project004-IPSHOCH-Exp5-ChIP-ES-2i-CTCF-IP-Blobel-Rep2-S1_S9_MACS2_rendition_1E-8_downsampled_try3_peak_525	433	18.8085	43.3621	40.5817	109
chr1	39397525	39397833	Project004-IPSHOCH-Exp5-ChIP-ES-2i-CTCF-IP-Blobel-Rep2-S1_S9_MACS2_rendition_1E-8_downsampled_try3_peak_526	645	22.2973	64.5809	61.5219	160
chr1	39401876	39402125	Project004-IPSHOCH-Exp5-ChIP-ES-2i-CTCF-IP-Blobel-Rep2-S1_S9_MACS2_rendition_1E-8_downsampled_try3_peak_527	477	17.8378	47.7286	44.8901	132
chr1	39409678	39409935	Project004-IPSHOCH-Exp5-ChIP-ES-2i-CTCF-IP-Blobel-Rep2-S1_S9_MACS2_rendition_1E-8_downsampled_try3_peak_528	248	8.8983	24.8937	22.3625	109
chr1	39419098	39419266	Project004-IPSHOCH-Exp5-ChIP-ES-2i-CTCF-IP-Blobel-Rep2-S1_S9_MACS2_rendition_1E-8_downsampled_try3_peak_529	229	9.28984	22.9143	20.4105	66
chr1	39449048	39449506	Project004-IPSHOCH-Exp5-ChIP-ES-2i-CTCF-IP-Blobel-Rep2-S1_S9_MACS2_rendition_1E-8_downsampled_try3_peak_530	1397	36.2703	139.702	135.537	185
chr1	39473314	39473493	Project004-IPSHOCH-Exp5-ChIP-ES-2i-CTCF-IP-Blobel-Rep2-S1_S9_MACS2_rendition_1E-8_downsampled_try3_peak_531	145	7.7027	14.5288	12.1727	44
chr1	39473740	39474083	Project004-IPSHOCH-Exp5-ChIP-ES-2i-CTCF-IP-Blobel-Rep2-S1_S9_MACS2_rendition_1E-8_downsampled_try3_peak_532	341	15.3896	34.1498	31.4904	204
chr1	39485963	39486193	Project004-IPSHOCH-Exp5-ChIP-ES-2i-CTCF-IP-Blobel-Rep2-S1_S9_MACS2_rendition_1E-8_downsampled_try3_peak_533	216	8.13559	21.6982	19.2146	79
chr1	39489053	39489281	Project004-IPSHOCH-Exp5-ChIP-ES-2i-CTCF-IP-Blobel-Rep2-S1_S9_MACS2_rendition_1E-8_downsampled_try3_peak_534	182	9.92672	18.2036	15.7815	104
chr1	39553915	39554174	Project004-IPSHOCH-Exp5-ChIP-ES-2i-CTCF-IP-Blobel-Rep2-S1_S9_MACS2_rendition_1E-8_downsampled_try3_peak_535	239	10.479	23.9339	21.4157	134
chr1	39554594	39555036	Project004-IPSHOCH-Exp5-ChIP-ES-2i-CTCF-IP-Blobel-Rep2-S1_S9_MACS2_rendition_1E-8_downsampled_try3_peak_536	987	26.25	98.7009	95.1647	250
chr1	39561173	39561460	Project004-IPSHOCH-Exp5-ChIP-ES-2i-CTCF-IP-Blobel-Rep2-S1_S9_MACS2_rendition_1E-8_downsampled_try3_peak_537	379	16.4245	37.9213	35.2079	131
chr1	39579400	39579817	Project004-IPSHOCH-Exp5-ChIP-ES-2i-CTCF-IP-Blobel-Rep2-S1_S9_MACS2_rendition_1E-8_downsampled_try3_peak_538	823	26.7568	82.3854	79.0812	211
chr1	39584268	39584636	Project004-IPSHOCH-Exp5-ChIP-ES-2i-CTCF-IP-Blobel-Rep2-S1_S9_MACS2_rendition_1E-8_downsampled_try3_peak_539	1471	39.6707	147.116	142.833	227
chr1	39587116	39587493	Project004-IPSHOCH-Exp5-ChIP-ES-2i-CTCF-IP-Blobel-Rep2-S1_S9_MACS2_rendition_1E-8_downsampled_try3_peak_540	1121	20.7407	112.122	108.383	220
chr1	39597502	39597658	Project004-IPSHOCH-Exp5-ChIP-ES-2i-CTCF-IP-Blobel-Rep2-S1_S9_MACS2_rendition_1E-8_downsampled_try3_peak_541	200	10.4832	20.0947	17.6374	66
chr1	39671779	39672131	Project004-IPSHOCH-Exp5-ChIP-ES-2i-CTCF-IP-Blobel-Rep2-S1_S9_MACS2_rendition_1E-8_downsampled_try3_peak_542	1118	36.8852	111.855	108.117	179
chr1	39698510	39698899	Project004-IPSHOCH-Exp5-ChIP-ES-2i-CTCF-IP-Blobel-Rep2-S1_S9_MACS2_rendition_1E-8_downsampled_try3_peak_543	709	23.9189	70.9547	67.8104	144
chr1	39707677	39708007	Project004-IPSHOCH-Exp5-ChIP-ES-2i-CTCF-IP-Blobel-Rep2-S1_S9_MACS2_rendition_1E-8_downsampled_try3_peak_544	767	23.1439	76.7738	73.5525	189
chr1	39721225	39721413	Project004-IPSHOCH-Exp5-ChIP-ES-2i-CTCF-IP-Blobel-Rep2-S1_S9_MACS2_rendition_1E-8_downsampled_try3_peak_545	179	9.45776	17.9037	15.488	142
chr1	39737440	39737737	Project004-IPSHOCH-Exp5-ChIP-ES-2i-CTCF-IP-Blobel-Rep2-S1_S9_MACS2_rendition_1E-8_downsampled_try3_peak_546	944	31.4447	94.4057	90.9305	156
chr1	39742730	39743052	Project004-IPSHOCH-Exp5-ChIP-ES-2i-CTCF-IP-Blobel-Rep2-S1_S9_MACS2_rendition_1E-8_downsampled_try3_peak_547	591	16.017	59.107	56.1212	141
chr1	39815433	39815628	Project004-IPSHOCH-Exp5-ChIP-ES-2i-CTCF-IP-Blobel-Rep2-S1_S9_MACS2_rendition_1E-8_downsampled_try3_peak_548	210	11.087	21.0994	18.6237	92
chr1	39818236	39818548	Project004-IPSHOCH-Exp5-ChIP-ES-2i-CTCF-IP-Blobel-Rep2-S1_S9_MACS2_rendition_1E-8_downsampled_try3_peak_549	654	23.8081	65.461	62.3925	175
chr1	39968395	39968708	Project004-IPSHOCH-Exp5-ChIP-ES-2i-CTCF-IP-Blobel-Rep2-S1_S9_MACS2_rendition_1E-8_downsampled_try3_peak_550	1346	38.9189	134.659	130.569	136
chr1	39993374	39993752	Project004-IPSHOCH-Exp5-ChIP-ES-2i-CTCF-IP-Blobel-Rep2-S1_S9_MACS2_rendition_1E-8_downsampled_try3_peak_551	1180	30	118.069	114.238	201
chr1	40012296	40012455	Project004-IPSHOCH-Exp5-ChIP-ES-2i-CTCF-IP-Blobel-Rep2-S1_S9_MACS2_rendition_1E-8_downsampled_try3_peak_552	204	9.72973	20.4115	17.9491	87
chr1	40040135	40040295	Project004-IPSHOCH-Exp5-ChIP-ES-2i-CTCF-IP-Blobel-Rep2-S1_S9_MACS2_rendition_1E-8_downsampled_try3_peak_553	210	9.76359	21.0097	18.5392	83
chr1	40057770	40058105	Project004-IPSHOCH-Exp5-ChIP-ES-2i-CTCF-IP-Blobel-Rep2-S1_S9_MACS2_rendition_1E-8_downsampled_try3_peak_554	832	27.8063	83.2771	79.9624	194
chr1	40152464	40152751	Project004-IPSHOCH-Exp5-ChIP-ES-2i-CTCF-IP-Blobel-Rep2-S1_S9_MACS2_rendition_1E-8_downsampled_try3_peak_555	496	15.9375	49.6638	46.7992	130
chr1	40172170	40172449	Project004-IPSHOCH-Exp5-ChIP-ES-2i-CTCF-IP-Blobel-Rep2-S1_S9_MACS2_rendition_1E-8_downsampled_try3_peak_556	509	12.037	50.9729	48.0944	131
chr1	40173264	40173562	Project004-IPSHOCH-Exp5-ChIP-ES-2i-CTCF-IP-Blobel-Rep2-S1_S9_MACS2_rendition_1E-8_downsampled_try3_peak_557	725	24.3243	72.5667	69.4011	159
chr1	40347516	40347739	Project004-IPSHOCH-Exp5-ChIP-ES-2i-CTCF-IP-Blobel-Rep2-S1_S9_MACS2_rendition_1E-8_downsampled_try3_peak_558	389	17.4224	38.9194	36.1955	102
chr1	40350800	40351054	Project004-IPSHOCH-Exp5-ChIP-ES-2i-CTCF-IP-Blobel-Rep2-S1_S9_MACS2_rendition_1E-8_downsampled_try3_peak_559	404	17.9503	40.4998	37.7504	150
chr1	40435621	40435961	Project004-IPSHOCH-Exp5-ChIP-ES-2i-CTCF-IP-Blobel-Rep2-S1_S9_MACS2_rendition_1E-8_downsampled_try3_peak_560	979	32.3431	97.9374	94.4112	194
chr1	40436934	40437227	Project004-IPSHOCH-Exp5-ChIP-ES-2i-CTCF-IP-Blobel-Rep2-S1_S9_MACS2_rendition_1E-8_downsampled_try3_peak_561	623	18.75	62.3143	59.2839	151
chr1	40594523	40594697	Project004-IPSHOCH-Exp5-ChIP-ES-2i-CTCF-IP-Blobel-Rep2-S1_S9_MACS2_rendition_1E-8_downsampled_try3_peak_562	156	8.10811	15.6651	13.2917	68
chr1	40601584	40601831	Project004-IPSHOCH-Exp5-ChIP-ES-2i-CTCF-IP-Blobel-Rep2-S1_S9_MACS2_rendition_1E-8_downsampled_try3_peak_563	598	21.0811	59.8822	56.8861	121
chr1	40636656	40636984	Project004-IPSHOCH-Exp5-ChIP-ES-2i-CTCF-IP-Blobel-Rep2-S1_S9_MACS2_rendition_1E-8_downsampled_try3_peak_564	876	31.4497	87.6386	84.261	150
chr1	40676014	40676250	Project004-IPSHOCH-Exp5-ChIP-ES-2i-CTCF-IP-Blobel-Rep2-S1_S9_MACS2_rendition_1E-8_downsampled_try3_peak_565	280	12.1622	28.0497	25.4722	121
chr1	40714883	40715145	Project004-IPSHOCH-Exp5-ChIP-ES-2i-CTCF-IP-Blobel-Rep2-S1_S9_MACS2_rendition_1E-8_downsampled_try3_peak_566	462	17.4324	46.2512	43.4318	140
chr1	40820984	40821246	Project004-IPSHOCH-Exp5-ChIP-ES-2i-CTCF-IP-Blobel-Rep2-S1_S9_MACS2_rendition_1E-8_downsampled_try3_peak_567	327	15.3106	32.7313	30.0878	117
chr1	40825499	40825842	Project004-IPSHOCH-Exp5-ChIP-ES-2i-CTCF-IP-Blobel-Rep2-S1_S9_MACS2_rendition_1E-8_downsampled_try3_peak_568	778	27.9004	77.8364	74.5993	161
chr1	40854231	40854558	Project004-IPSHOCH-Exp5-ChIP-ES-2i-CTCF-IP-Blobel-Rep2-S1_S9_MACS2_rendition_1E-8_downsampled_try3_peak_569	774	25.5405	77.4452	74.2101	149
chr1	40859592	40859950	Project004-IPSHOCH-Exp5-ChIP-ES-2i-CTCF-IP-Blobel-Rep2-S1_S9_MACS2_rendition_1E-8_downsampled_try3_peak_570	790	25.9459	79.0852	75.8275	201
chr1	40901482	40901974	Project004-IPSHOCH-Exp5-ChIP-ES-2i-CTCF-IP-Blobel-Rep2-S1_S9_MACS2_rendition_1E-8_downsampled_try3_peak_571	708	27.4534	70.815	67.6748	168
chr1	40935936	40936288	Project004-IPSHOCH-Exp5-ChIP-ES-2i-CTCF-IP-Blobel-Rep2-S1_S9_MACS2_rendition_1E-8_downsampled_try3_peak_572	666	19.6875	66.6649	63.5776	151
chr1	40941828	40942155	Project004-IPSHOCH-Exp5-ChIP-ES-2i-CTCF-IP-Blobel-Rep2-S1_S9_MACS2_rendition_1E-8_downsampled_try3_peak_573	453	19.5342	45.3151	42.5059	149
chr1	40944481	40944740	Project004-IPSHOCH-Exp5-ChIP-ES-2i-CTCF-IP-Blobel-Rep2-S1_S9_MACS2_rendition_1E-8_downsampled_try3_peak_574	316	13.9255	31.6859	29.0565	138
chr1	41058518	41058732	Project004-IPSHOCH-Exp5-ChIP-ES-2i-CTCF-IP-Blobel-Rep2-S1_S9_MACS2_rendition_1E-8_downsampled_try3_peak_575	535	22.1739	53.5683	50.6563	103
chr1	41115261	41115456	Project004-IPSHOCH-Exp5-ChIP-ES-2i-CTCF-IP-Blobel-Rep2-S1_S9_MACS2_rendition_1E-8_downsampled_try3_peak_576	297	14.2547	29.7236	27.1208	69
chr1	41162355	41162593	Project004-IPSHOCH-Exp5-ChIP-ES-2i-CTCF-IP-Blobel-Rep2-S1_S9_MACS2_rendition_1E-8_downsampled_try3_peak_577	373	16.8944	37.3519	34.6487	105
chr1	41209494	41209712	Project004-IPSHOCH-Exp5-ChIP-ES-2i-CTCF-IP-Blobel-Rep2-S1_S9_MACS2_rendition_1E-8_downsampled_try3_peak_578	293	12.5676	29.3754	26.7781	90
chr1	41321064	41321498	Project004-IPSHOCH-Exp5-ChIP-ES-2i-CTCF-IP-Blobel-Rep2-S1_S9_MACS2_rendition_1E-8_downsampled_try3_peak_579	638	25.3416	63.8073	60.7572	184
chr1	41443331	41443614	Project004-IPSHOCH-Exp5-ChIP-ES-2i-CTCF-IP-Blobel-Rep2-S1_S9_MACS2_rendition_1E-8_downsampled_try3_peak_580	334	13.7838	33.4333	30.7802	132
chr1	41867267	41867488	Project004-IPSHOCH-Exp5-ChIP-ES-2i-CTCF-IP-Blobel-Rep2-S1_S9_MACS2_rendition_1E-8_downsampled_try3_peak_581	462	17.4324	46.2512	43.4318	108
chr1	42017928	42018130	Project004-IPSHOCH-Exp5-ChIP-ES-2i-CTCF-IP-Blobel-Rep2-S1_S9_MACS2_rendition_1E-8_downsampled_try3_peak_582	107	6.86335	10.7859	8.52048	108
chr1	42217689	42217939	Project004-IPSHOCH-Exp5-ChIP-ES-2i-CTCF-IP-Blobel-Rep2-S1_S9_MACS2_rendition_1E-8_downsampled_try3_peak_583	373	16.8944	37.3519	34.6487	115
chr1	42295328	42295504	Project004-IPSHOCH-Exp5-ChIP-ES-2i-CTCF-IP-Blobel-Rep2-S1_S9_MACS2_rendition_1E-8_downsampled_try3_peak_584	186	8.125	18.6213	16.1884	129
chr1	42571341	42571606	Project004-IPSHOCH-Exp5-ChIP-ES-2i-CTCF-IP-Blobel-Rep2-S1_S9_MACS2_rendition_1E-8_downsampled_try3_peak_585	815	30.6211	81.572	78.2815	125
chr1	42741694	42741978	Project004-IPSHOCH-Exp5-ChIP-ES-2i-CTCF-IP-Blobel-Rep2-S1_S9_MACS2_rendition_1E-8_downsampled_try3_peak_586	638	25.3416	63.8073	60.7572	143
chr1	42748128	42748423	Project004-IPSHOCH-Exp5-ChIP-ES-2i-CTCF-IP-Blobel-Rep2-S1_S9_MACS2_rendition_1E-8_downsampled_try3_peak_587	873	27.973	87.3842	84.0101	142
chr1	42771510	42771733	Project004-IPSHOCH-Exp5-ChIP-ES-2i-CTCF-IP-Blobel-Rep2-S1_S9_MACS2_rendition_1E-8_downsampled_try3_peak_588	357	15.9744	35.7981	33.1142	122
chr1	42775489	42775686	Project004-IPSHOCH-Exp5-ChIP-ES-2i-CTCF-IP-Blobel-Rep2-S1_S9_MACS2_rendition_1E-8_downsampled_try3_peak_589	224	11.6149	22.4912	19.9952	83
chr1	42879617	42879879	Project004-IPSHOCH-Exp5-ChIP-ES-2i-CTCF-IP-Blobel-Rep2-S1_S9_MACS2_rendition_1E-8_downsampled_try3_peak_590	186	8.125	18.6213	16.1884	131
chr1	42912976	42913602	Project004-IPSHOCH-Exp5-ChIP-ES-2i-CTCF-IP-Blobel-Rep2-S1_S9_MACS2_rendition_1E-8_downsampled_try3_peak_591	362	14.5946	36.202	33.5124	442
chr1	42971940	42972189	Project004-IPSHOCH-Exp5-ChIP-ES-2i-CTCF-IP-Blobel-Rep2-S1_S9_MACS2_rendition_1E-8_downsampled_try3_peak_592	362	14.5946	36.202	33.5124	103
chr1	43050737	43050958	Project004-IPSHOCH-Exp5-ChIP-ES-2i-CTCF-IP-Blobel-Rep2-S1_S9_MACS2_rendition_1E-8_downsampled_try3_peak_593	357	16.3665	35.7978	33.1142	119
chr1	43108897	43109070	Project004-IPSHOCH-Exp5-ChIP-ES-2i-CTCF-IP-Blobel-Rep2-S1_S9_MACS2_rendition_1E-8_downsampled_try3_peak_594	170	9.50311	17.0487	14.6428	44
chr1	43122803	43123095	Project004-IPSHOCH-Exp5-ChIP-ES-2i-CTCF-IP-Blobel-Rep2-S1_S9_MACS2_rendition_1E-8_downsampled_try3_peak_595	924	29.1892	92.4393	88.9923	143
chr1	43167433	43167763	Project004-IPSHOCH-Exp5-ChIP-ES-2i-CTCF-IP-Blobel-Rep2-S1_S9_MACS2_rendition_1E-8_downsampled_try3_peak_596	973	22.8814	97.3691	93.8517	212
chr1	43169797	43170085	Project004-IPSHOCH-Exp5-ChIP-ES-2i-CTCF-IP-Blobel-Rep2-S1_S9_MACS2_rendition_1E-8_downsampled_try3_peak_597	281	9.66102	28.1988	25.6196	111
chr1	43195099	43195506	Project004-IPSHOCH-Exp5-ChIP-ES-2i-CTCF-IP-Blobel-Rep2-S1_S9_MACS2_rendition_1E-8_downsampled_try3_peak_598	1147	37.9584	114.736	110.962	164
chr1	43196483	43196767	Project004-IPSHOCH-Exp5-ChIP-ES-2i-CTCF-IP-Blobel-Rep2-S1_S9_MACS2_rendition_1E-8_downsampled_try3_peak_599	1155	28.7356	115.543	111.753	146
chr1	43321256	43321589	Project004-IPSHOCH-Exp5-ChIP-ES-2i-CTCF-IP-Blobel-Rep2-S1_S9_MACS2_rendition_1E-8_downsampled_try3_peak_600	552	19.8649	55.2579	52.3185	165
chr1	43326597	43326884	Project004-IPSHOCH-Exp5-ChIP-ES-2i-CTCF-IP-Blobel-Rep2-S1_S9_MACS2_rendition_1E-8_downsampled_try3_peak_601	924	29.1892	92.4393	88.9923	147
chr1	43337001	43337233	Project004-IPSHOCH-Exp5-ChIP-ES-2i-CTCF-IP-Blobel-Rep2-S1_S9_MACS2_rendition_1E-8_downsampled_try3_peak_602	267	13.1988	26.7789	24.2164	99
chr1	43356379	43356617	Project004-IPSHOCH-Exp5-ChIP-ES-2i-CTCF-IP-Blobel-Rep2-S1_S9_MACS2_rendition_1E-8_downsampled_try3_peak_603	270	9.40678	27.0855	24.5191	95
chr1	43502417	43502665	Project004-IPSHOCH-Exp5-ChIP-ES-2i-CTCF-IP-Blobel-Rep2-S1_S9_MACS2_rendition_1E-8_downsampled_try3_peak_604	143	5.78571	14.3334	11.9909	120
chr1	43568207	43568427	Project004-IPSHOCH-Exp5-ChIP-ES-2i-CTCF-IP-Blobel-Rep2-S1_S9_MACS2_rendition_1E-8_downsampled_try3_peak_605	362	11.4407	36.2919	33.6005	121
chr1	43618453	43618761	Project004-IPSHOCH-Exp5-ChIP-ES-2i-CTCF-IP-Blobel-Rep2-S1_S9_MACS2_rendition_1E-8_downsampled_try3_peak_606	176	7.11864	17.6258	15.2116	63
chr1	43692627	43692895	Project004-IPSHOCH-Exp5-ChIP-ES-2i-CTCF-IP-Blobel-Rep2-S1_S9_MACS2_rendition_1E-8_downsampled_try3_peak_607	620	24.8137	62.0773	59.0517	137
chr1	43733411	43733611	Project004-IPSHOCH-Exp5-ChIP-ES-2i-CTCF-IP-Blobel-Rep2-S1_S9_MACS2_rendition_1E-8_downsampled_try3_peak_608	156	8.10811	15.6651	13.2917	138
chr1	43789022	43789251	Project004-IPSHOCH-Exp5-ChIP-ES-2i-CTCF-IP-Blobel-Rep2-S1_S9_MACS2_rendition_1E-8_downsampled_try3_peak_609	244	11.8222	24.4771	21.9498	111
chr1	43795019	43795399	Project004-IPSHOCH-Exp5-ChIP-ES-2i-CTCF-IP-Blobel-Rep2-S1_S9_MACS2_rendition_1E-8_downsampled_try3_peak_610	743	28.5093	74.3692	71.1746	180
chr1	43816936	43817342	Project004-IPSHOCH-Exp5-ChIP-ES-2i-CTCF-IP-Blobel-Rep2-S1_S9_MACS2_rendition_1E-8_downsampled_try3_peak_611	537	19.4595	53.7338	50.8181	218
chr1	43819543	43819784	Project004-IPSHOCH-Exp5-ChIP-ES-2i-CTCF-IP-Blobel-Rep2-S1_S9_MACS2_rendition_1E-8_downsampled_try3_peak_612	401	17.7636	40.183	37.4461	115
chr1	43949909	43950158	Project004-IPSHOCH-Exp5-ChIP-ES-2i-CTCF-IP-Blobel-Rep2-S1_S9_MACS2_rendition_1E-8_downsampled_try3_peak_613	194	10.3887	19.4439	17.0005	138
chr1	43955852	43956169	Project004-IPSHOCH-Exp5-ChIP-ES-2i-CTCF-IP-Blobel-Rep2-S1_S9_MACS2_rendition_1E-8_downsampled_try3_peak_614	724	19.9869	72.4026	69.2441	139
chr1	43959610	43960035	Project004-IPSHOCH-Exp5-ChIP-ES-2i-CTCF-IP-Blobel-Rep2-S1_S9_MACS2_rendition_1E-8_downsampled_try3_peak_615	771	26.9526	77.1316	73.9016	215
chr1	44006740	44006899	Project004-IPSHOCH-Exp5-ChIP-ES-2i-CTCF-IP-Blobel-Rep2-S1_S9_MACS2_rendition_1E-8_downsampled_try3_peak_616	156	8.10811	15.6651	13.2917	104
chr1	44023650	44023990	Project004-IPSHOCH-Exp5-ChIP-ES-2i-CTCF-IP-Blobel-Rep2-S1_S9_MACS2_rendition_1E-8_downsampled_try3_peak_617	648	22.4575	64.8618	61.7988	147
chr1	44098684	44099051	Project004-IPSHOCH-Exp5-ChIP-ES-2i-CTCF-IP-Blobel-Rep2-S1_S9_MACS2_rendition_1E-8_downsampled_try3_peak_618	846	23.4375	84.6556	81.3202	164
chr1	44121521	44121860	Project004-IPSHOCH-Exp5-ChIP-ES-2i-CTCF-IP-Blobel-Rep2-S1_S9_MACS2_rendition_1E-8_downsampled_try3_peak_619	785	22.1875	78.5596	75.3095	136
chr1	44176688	44177002	Project004-IPSHOCH-Exp5-ChIP-ES-2i-CTCF-IP-Blobel-Rep2-S1_S9_MACS2_rendition_1E-8_downsampled_try3_peak_620	807	28.5452	80.7908	77.5095	144
chr1	44205711	44205895	Project004-IPSHOCH-Exp5-ChIP-ES-2i-CTCF-IP-Blobel-Rep2-S1_S9_MACS2_rendition_1E-8_downsampled_try3_peak_621	238	11.1225	23.88	21.3668	87
chr1	44212180	44212493	Project004-IPSHOCH-Exp5-ChIP-ES-2i-CTCF-IP-Blobel-Rep2-S1_S9_MACS2_rendition_1E-8_downsampled_try3_peak_622	603	24.2857	60.3564	57.3534	150
chr1	44221738	44221931	Project004-IPSHOCH-Exp5-ChIP-ES-2i-CTCF-IP-Blobel-Rep2-S1_S9_MACS2_rendition_1E-8_downsampled_try3_peak_623	191	9.32432	19.1965	16.7542	118
chr1	44224876	44225116	Project004-IPSHOCH-Exp5-ChIP-ES-2i-CTCF-IP-Blobel-Rep2-S1_S9_MACS2_rendition_1E-8_downsampled_try3_peak_624	424	18.2763	42.4603	39.6885	100
chr1	44230754	44231088	Project004-IPSHOCH-Exp5-ChIP-ES-2i-CTCF-IP-Blobel-Rep2-S1_S9_MACS2_rendition_1E-8_downsampled_try3_peak_625	552	22.7019	55.2506	52.3145	193
chr1	44285909	44286235	Project004-IPSHOCH-Exp5-ChIP-ES-2i-CTCF-IP-Blobel-Rep2-S1_S9_MACS2_rendition_1E-8_downsampled_try3_peak_626	690	26.9255	69.0503	65.9337	175
chr1	44294262	44294491	Project004-IPSHOCH-Exp5-ChIP-ES-2i-CTCF-IP-Blobel-Rep2-S1_S9_MACS2_rendition_1E-8_downsampled_try3_peak_627	267	13.1988	26.7789	24.2164	91
chr1	44494726	44494941	Project004-IPSHOCH-Exp5-ChIP-ES-2i-CTCF-IP-Blobel-Rep2-S1_S9_MACS2_rendition_1E-8_downsampled_try3_peak_628	435	18.4704	43.5115	40.7285	121
chr1	44608309	44608699	Project004-IPSHOCH-Exp5-ChIP-ES-2i-CTCF-IP-Blobel-Rep2-S1_S9_MACS2_rendition_1E-8_downsampled_try3_peak_629	1057	37.4845	105.764	102.123	144
chr1	44798183	44798388	Project004-IPSHOCH-Exp5-ChIP-ES-2i-CTCF-IP-Blobel-Rep2-S1_S9_MACS2_rendition_1E-8_downsampled_try3_peak_630	282	13.7267	28.2431	25.6591	115
chr1	44802577	44802862	Project004-IPSHOCH-Exp5-ChIP-ES-2i-CTCF-IP-Blobel-Rep2-S1_S9_MACS2_rendition_1E-8_downsampled_try3_peak_631	725	27.9814	72.5881	69.4185	145
chr1	45370873	45371065	Project004-IPSHOCH-Exp5-ChIP-ES-2i-CTCF-IP-Blobel-Rep2-S1_S9_MACS2_rendition_1E-8_downsampled_try3_peak_632	267	11.7568	26.7382	24.1801	105
chr1	45488754	45489028	Project004-IPSHOCH-Exp5-ChIP-ES-2i-CTCF-IP-Blobel-Rep2-S1_S9_MACS2_rendition_1E-8_downsampled_try3_peak_633	462	17.4324	46.2512	43.4318	151
chr1	45684767	45685055	Project004-IPSHOCH-Exp5-ChIP-ES-2i-CTCF-IP-Blobel-Rep2-S1_S9_MACS2_rendition_1E-8_downsampled_try3_peak_634	404	15.8108	40.4434	37.6984	145
chr1	45823044	45823367	Project004-IPSHOCH-Exp5-ChIP-ES-2i-CTCF-IP-Blobel-Rep2-S1_S9_MACS2_rendition_1E-8_downsampled_try3_peak_635	992	30.8108	99.2628	95.7152	180
chr1	45827023	45827193	Project004-IPSHOCH-Exp5-ChIP-ES-2i-CTCF-IP-Blobel-Rep2-S1_S9_MACS2_rendition_1E-8_downsampled_try3_peak_636	142	8.03909	14.206	11.8645	83
chr1	45873680	45874098	Project004-IPSHOCH-Exp5-ChIP-ES-2i-CTCF-IP-Blobel-Rep2-S1_S9_MACS2_rendition_1E-8_downsampled_try3_peak_637	1292	37.7027	129.225	125.218	227
chr1	45882029	45882327	Project004-IPSHOCH-Exp5-ChIP-ES-2i-CTCF-IP-Blobel-Rep2-S1_S9_MACS2_rendition_1E-8_downsampled_try3_peak_638	872	27.338	87.2173	83.8483	148
chr1	45919807	45920067	Project004-IPSHOCH-Exp5-ChIP-ES-2i-CTCF-IP-Blobel-Rep2-S1_S9_MACS2_rendition_1E-8_downsampled_try3_peak_639	282	13.7267	28.2431	25.6591	114
chr1	46075294	46075524	Project004-IPSHOCH-Exp5-ChIP-ES-2i-CTCF-IP-Blobel-Rep2-S1_S9_MACS2_rendition_1E-8_downsampled_try3_peak_640	389	17.4224	38.9194	36.1955	108
chr1	46079184	46079414	Project004-IPSHOCH-Exp5-ChIP-ES-2i-CTCF-IP-Blobel-Rep2-S1_S9_MACS2_rendition_1E-8_downsampled_try3_peak_641	280	12.1622	28.0497	25.4722	133
chr1	46123301	46123464	Project004-IPSHOCH-Exp5-ChIP-ES-2i-CTCF-IP-Blobel-Rep2-S1_S9_MACS2_rendition_1E-8_downsampled_try3_peak_642	196	8.11061	19.603	17.1589	123
chr1	46123887	46124080	Project004-IPSHOCH-Exp5-ChIP-ES-2i-CTCF-IP-Blobel-Rep2-S1_S9_MACS2_rendition_1E-8_downsampled_try3_peak_643	168	7.94492	16.8152	14.4212	95
chr1	46473788	46474137	Project004-IPSHOCH-Exp5-ChIP-ES-2i-CTCF-IP-Blobel-Rep2-S1_S9_MACS2_rendition_1E-8_downsampled_try3_peak_644	815	30.6211	81.572	78.2815	211
chr1	46479238	46479417	Project004-IPSHOCH-Exp5-ChIP-ES-2i-CTCF-IP-Blobel-Rep2-S1_S9_MACS2_rendition_1E-8_downsampled_try3_peak_645	217	10.8764	21.7916	19.3065	55
chr1	46482553	46482742	Project004-IPSHOCH-Exp5-ChIP-ES-2i-CTCF-IP-Blobel-Rep2-S1_S9_MACS2_rendition_1E-8_downsampled_try3_peak_646	191	9.32432	19.1965	16.7542	95
chr1	46485311	46485548	Project004-IPSHOCH-Exp5-ChIP-ES-2i-CTCF-IP-Blobel-Rep2-S1_S9_MACS2_rendition_1E-8_downsampled_try3_peak_647	485	20.5901	48.5837	45.7327	113
chr1	46637290	46637455	Project004-IPSHOCH-Exp5-ChIP-ES-2i-CTCF-IP-Blobel-Rep2-S1_S9_MACS2_rendition_1E-8_downsampled_try3_peak_648	204	9.72973	20.4115	17.9491	112
chr1	46826236	46826483	Project004-IPSHOCH-Exp5-ChIP-ES-2i-CTCF-IP-Blobel-Rep2-S1_S9_MACS2_rendition_1E-8_downsampled_try3_peak_649	569	23.2298	56.9428	53.9834	111
chr1	46836426	46836608	Project004-IPSHOCH-Exp5-ChIP-ES-2i-CTCF-IP-Blobel-Rep2-S1_S9_MACS2_rendition_1E-8_downsampled_try3_peak_650	214	10.9824	21.4366	18.9583	80
chr1	46906648	46906917	Project004-IPSHOCH-Exp5-ChIP-ES-2i-CTCF-IP-Blobel-Rep2-S1_S9_MACS2_rendition_1E-8_downsampled_try3_peak_651	611	22.803	61.1643	58.1528	141
chr1	46971149	46971709	Project004-IPSHOCH-Exp5-ChIP-ES-2i-CTCF-IP-Blobel-Rep2-S1_S9_MACS2_rendition_1E-8_downsampled_try3_peak_652	852	31.1445	85.2348	81.892	251
chr1	46996196	46996528	Project004-IPSHOCH-Exp5-ChIP-ES-2i-CTCF-IP-Blobel-Rep2-S1_S9_MACS2_rendition_1E-8_downsampled_try3_peak_653	492	18.2432	49.2158	46.3584	150
chr1	47027435	47027697	Project004-IPSHOCH-Exp5-ChIP-ES-2i-CTCF-IP-Blobel-Rep2-S1_S9_MACS2_rendition_1E-8_downsampled_try3_peak_654	870	32.205	87.0524	83.6864	141
chr1	47334619	47334890	Project004-IPSHOCH-Exp5-ChIP-ES-2i-CTCF-IP-Blobel-Rep2-S1_S9_MACS2_rendition_1E-8_downsampled_try3_peak_655	297	14.2547	29.7236	27.1208	127
chr1	47866388	47866687	Project004-IPSHOCH-Exp5-ChIP-ES-2i-CTCF-IP-Blobel-Rep2-S1_S9_MACS2_rendition_1E-8_downsampled_try3_peak_656	390	15.4054	39.0183	36.2879	178
chr1	49519684	49519836	Project004-IPSHOCH-Exp5-ChIP-ES-2i-CTCF-IP-Blobel-Rep2-S1_S9_MACS2_rendition_1E-8_downsampled_try3_peak_657	144	8.44721	14.4632	12.1115	62
chr1	50086674	50086883	Project004-IPSHOCH-Exp5-ChIP-ES-2i-CTCF-IP-Blobel-Rep2-S1_S9_MACS2_rendition_1E-8_downsampled_try3_peak_658	327	15.3106	32.7313	30.0878	102
chr1	50983946	50984158	Project004-IPSHOCH-Exp5-ChIP-ES-2i-CTCF-IP-Blobel-Rep2-S1_S9_MACS2_rendition_1E-8_downsampled_try3_peak_659	216	8.13559	21.6982	19.2146	128
chr1	51019176	51019459	Project004-IPSHOCH-Exp5-ChIP-ES-2i-CTCF-IP-Blobel-Rep2-S1_S9_MACS2_rendition_1E-8_downsampled_try3_peak_660	442	14.6875	44.2539	41.4596	130
chr1	51345912	51346064	Project004-IPSHOCH-Exp5-ChIP-ES-2i-CTCF-IP-Blobel-Rep2-S1_S9_MACS2_rendition_1E-8_downsampled_try3_peak_661	112	6.48649	11.2573	8.98216	120
chr1	51390843	51391161	Project004-IPSHOCH-Exp5-ChIP-ES-2i-CTCF-IP-Blobel-Rep2-S1_S9_MACS2_rendition_1E-8_downsampled_try3_peak_662	813	28.8462	81.3059	78.0196	148
chr1	51394952	51395314	Project004-IPSHOCH-Exp5-ChIP-ES-2i-CTCF-IP-Blobel-Rep2-S1_S9_MACS2_rendition_1E-8_downsampled_try3_peak_663	485	20.5901	48.5837	45.7327	159
chr1	51404449	51404759	Project004-IPSHOCH-Exp5-ChIP-ES-2i-CTCF-IP-Blobel-Rep2-S1_S9_MACS2_rendition_1E-8_downsampled_try3_peak_664	389	10.9286	38.9735	36.2487	171
chr1	51414495	51414647	Project004-IPSHOCH-Exp5-ChIP-ES-2i-CTCF-IP-Blobel-Rep2-S1_S9_MACS2_rendition_1E-8_downsampled_try3_peak_665	174	9.48482	17.4721	15.0624	70
chr1	51515870	51516172	Project004-IPSHOCH-Exp5-ChIP-ES-2i-CTCF-IP-Blobel-Rep2-S1_S9_MACS2_rendition_1E-8_downsampled_try3_peak_666	1134	39.5963	113.423	109.663	152
chr1	51522192	51522416	Project004-IPSHOCH-Exp5-ChIP-ES-2i-CTCF-IP-Blobel-Rep2-S1_S9_MACS2_rendition_1E-8_downsampled_try3_peak_667	312	14.7826	31.2198	28.5969	126
chr1	51523285	51523551	Project004-IPSHOCH-Exp5-ChIP-ES-2i-CTCF-IP-Blobel-Rep2-S1_S9_MACS2_rendition_1E-8_downsampled_try3_peak_668	267	11.7568	26.7382	24.1801	131
chr1	51653861	51654237	Project004-IPSHOCH-Exp5-ChIP-ES-2i-CTCF-IP-Blobel-Rep2-S1_S9_MACS2_rendition_1E-8_downsampled_try3_peak_669	1153	32.9341	115.341	111.555	176
chr1	51657303	51657652	Project004-IPSHOCH-Exp5-ChIP-ES-2i-CTCF-IP-Blobel-Rep2-S1_S9_MACS2_rendition_1E-8_downsampled_try3_peak_670	741	24.7297	74.1858	70.9967	176
chr1	51672359	51672746	Project004-IPSHOCH-Exp5-ChIP-ES-2i-CTCF-IP-Blobel-Rep2-S1_S9_MACS2_rendition_1E-8_downsampled_try3_peak_671	907	28.7838	90.7481	87.3254	207
chr1	51695788	51696047	Project004-IPSHOCH-Exp5-ChIP-ES-2i-CTCF-IP-Blobel-Rep2-S1_S9_MACS2_rendition_1E-8_downsampled_try3_peak_672	614	23.9617	61.454	58.4378	137
chr1	51701309	51701657	Project004-IPSHOCH-Exp5-ChIP-ES-2i-CTCF-IP-Blobel-Rep2-S1_S9_MACS2_rendition_1E-8_downsampled_try3_peak_673	924	25	92.4044	88.9614	150
chr1	51725800	51725965	Project004-IPSHOCH-Exp5-ChIP-ES-2i-CTCF-IP-Blobel-Rep2-S1_S9_MACS2_rendition_1E-8_downsampled_try3_peak_674	137	7.98722	13.7078	11.3722	74
chr1	51784064	51784274	Project004-IPSHOCH-Exp5-ChIP-ES-2i-CTCF-IP-Blobel-Rep2-S1_S9_MACS2_rendition_1E-8_downsampled_try3_peak_675	216	10.1351	21.6442	19.1618	100
chr1	51972732	51973036	Project004-IPSHOCH-Exp5-ChIP-ES-2i-CTCF-IP-Blobel-Rep2-S1_S9_MACS2_rendition_1E-8_downsampled_try3_peak_676	538	16.875	53.8102	50.8916	158
chr1	52001771	52002026	Project004-IPSHOCH-Exp5-ChIP-ES-2i-CTCF-IP-Blobel-Rep2-S1_S9_MACS2_rendition_1E-8_downsampled_try3_peak_677	638	23.3589	63.825	60.7743	113
chr1	52055468	52055731	Project004-IPSHOCH-Exp5-ChIP-ES-2i-CTCF-IP-Blobel-Rep2-S1_S9_MACS2_rendition_1E-8_downsampled_try3_peak_678	608	18.4375	60.8783	57.8679	149
chr1	52060345	52060682	Project004-IPSHOCH-Exp5-ChIP-ES-2i-CTCF-IP-Blobel-Rep2-S1_S9_MACS2_rendition_1E-8_downsampled_try3_peak_679	114	5.9375	11.4842	9.20227	322
chr1	52060946	52061317	Project004-IPSHOCH-Exp5-ChIP-ES-2i-CTCF-IP-Blobel-Rep2-S1_S9_MACS2_rendition_1E-8_downsampled_try3_peak_680	1068	34.5891	106.87	103.209	186
chr1	52143155	52143398	Project004-IPSHOCH-Exp5-ChIP-ES-2i-CTCF-IP-Blobel-Rep2-S1_S9_MACS2_rendition_1E-8_downsampled_try3_peak_681	389	17.4224	38.9194	36.1955	95
chr1	52155733	52156156	Project004-IPSHOCH-Exp5-ChIP-ES-2i-CTCF-IP-Blobel-Rep2-S1_S9_MACS2_rendition_1E-8_downsampled_try3_peak_682	709	26.0088	70.9861	67.841	150
chr1	52157363	52157671	Project004-IPSHOCH-Exp5-ChIP-ES-2i-CTCF-IP-Blobel-Rep2-S1_S9_MACS2_rendition_1E-8_downsampled_try3_peak_683	480	17.5745	48.0433	45.2022	173
chr1	52170593	52171070	Project004-IPSHOCH-Exp5-ChIP-ES-2i-CTCF-IP-Blobel-Rep2-S1_S9_MACS2_rendition_1E-8_downsampled_try3_peak_684	1700	23.8835	170.033	165.417	201
chr1	52176059	52176258	Project004-IPSHOCH-Exp5-ChIP-ES-2i-CTCF-IP-Blobel-Rep2-S1_S9_MACS2_rendition_1E-8_downsampled_try3_peak_685	173	8.26308	17.3745	14.9667	112
chr1	52188782	52189049	Project004-IPSHOCH-Exp5-ChIP-ES-2i-CTCF-IP-Blobel-Rep2-S1_S9_MACS2_rendition_1E-8_downsampled_try3_peak_686	348	14.1892	34.8116	32.1402	138
chr1	52203415	52203739	Project004-IPSHOCH-Exp5-ChIP-ES-2i-CTCF-IP-Blobel-Rep2-S1_S9_MACS2_rendition_1E-8_downsampled_try3_peak_687	594	18.125	59.4496	56.4592	149
chr1	52226915	52227244	Project004-IPSHOCH-Exp5-ChIP-ES-2i-CTCF-IP-Blobel-Rep2-S1_S9_MACS2_rendition_1E-8_downsampled_try3_peak_688	799	26.9507	79.9104	76.6421	159
chr1	52273668	52273968	Project004-IPSHOCH-Exp5-ChIP-ES-2i-CTCF-IP-Blobel-Rep2-S1_S9_MACS2_rendition_1E-8_downsampled_try3_peak_689	1231	42.236	123.127	119.217	161
chr1	52324493	52324789	Project004-IPSHOCH-Exp5-ChIP-ES-2i-CTCF-IP-Blobel-Rep2-S1_S9_MACS2_rendition_1E-8_downsampled_try3_peak_690	685	26.6454	68.571	65.4614	146
chr1	52356583	52356748	Project004-IPSHOCH-Exp5-ChIP-ES-2i-CTCF-IP-Blobel-Rep2-S1_S9_MACS2_rendition_1E-8_downsampled_try3_peak_691	132	7.91925	13.209	10.8855	107
chr1	52358114	52358417	Project004-IPSHOCH-Exp5-ChIP-ES-2i-CTCF-IP-Blobel-Rep2-S1_S9_MACS2_rendition_1E-8_downsampled_try3_peak_692	333	9.85714	33.3413	30.6915	170
chr1	52359487	52359752	Project004-IPSHOCH-Exp5-ChIP-ES-2i-CTCF-IP-Blobel-Rep2-S1_S9_MACS2_rendition_1E-8_downsampled_try3_peak_693	1032	33.6907	103.28	99.6766	126
chr1	52363769	52364127	Project004-IPSHOCH-Exp5-ChIP-ES-2i-CTCF-IP-Blobel-Rep2-S1_S9_MACS2_rendition_1E-8_downsampled_try3_peak_694	1057	37.4845	105.764	102.123	194
chr1	52385520	52385682	Project004-IPSHOCH-Exp5-ChIP-ES-2i-CTCF-IP-Blobel-Rep2-S1_S9_MACS2_rendition_1E-8_downsampled_try3_peak_695	210	11.087	21.0994	18.6237	36
chr1	52449847	52450120	Project004-IPSHOCH-Exp5-ChIP-ES-2i-CTCF-IP-Blobel-Rep2-S1_S9_MACS2_rendition_1E-8_downsampled_try3_peak_696	502	21.118	50.2346	47.3624	140
chr1	52543080	52543334	Project004-IPSHOCH-Exp5-ChIP-ES-2i-CTCF-IP-Blobel-Rep2-S1_S9_MACS2_rendition_1E-8_downsampled_try3_peak_697	522	19.0541	52.2186	49.3222	142
chr1	52546726	52546975	Project004-IPSHOCH-Exp5-ChIP-ES-2i-CTCF-IP-Blobel-Rep2-S1_S9_MACS2_rendition_1E-8_downsampled_try3_peak_698	603	21.8173	60.3176	57.3179	120
chr1	52638799	52639006	Project004-IPSHOCH-Exp5-ChIP-ES-2i-CTCF-IP-Blobel-Rep2-S1_S9_MACS2_rendition_1E-8_downsampled_try3_peak_699	197	10.559	19.7277	17.2736	95
chr1	52683279	52683578	Project004-IPSHOCH-Exp5-ChIP-ES-2i-CTCF-IP-Blobel-Rep2-S1_S9_MACS2_rendition_1E-8_downsampled_try3_peak_700	216	10.1351	21.6442	19.1618	106
chr1	52687253	52687753	Project004-IPSHOCH-Exp5-ChIP-ES-2i-CTCF-IP-Blobel-Rep2-S1_S9_MACS2_rendition_1E-8_downsampled_try3_peak_701	1619	33.3051	161.968	157.469	230
chr1	52688540	52688762	Project004-IPSHOCH-Exp5-ChIP-ES-2i-CTCF-IP-Blobel-Rep2-S1_S9_MACS2_rendition_1E-8_downsampled_try3_peak_702	361	14.9726	36.1573	33.471	135
chr1	52705001	52705272	Project004-IPSHOCH-Exp5-ChIP-ES-2i-CTCF-IP-Blobel-Rep2-S1_S9_MACS2_rendition_1E-8_downsampled_try3_peak_703	496	19.8613	49.6403	46.7784	144
chr1	52775984	52776261	Project004-IPSHOCH-Exp5-ChIP-ES-2i-CTCF-IP-Blobel-Rep2-S1_S9_MACS2_rendition_1E-8_downsampled_try3_peak_704	464	18.4176	46.414	43.5931	166
chr1	52805168	52805433	Project004-IPSHOCH-Exp5-ChIP-ES-2i-CTCF-IP-Blobel-Rep2-S1_S9_MACS2_rendition_1E-8_downsampled_try3_peak_705	510	16.25	51.0377	48.1559	145
chr1	52910954	52911173	Project004-IPSHOCH-Exp5-ChIP-ES-2i-CTCF-IP-Blobel-Rep2-S1_S9_MACS2_rendition_1E-8_downsampled_try3_peak_706	277	10.625	27.7551	25.1828	105
chr1	53011997	53012364	Project004-IPSHOCH-Exp5-ChIP-ES-2i-CTCF-IP-Blobel-Rep2-S1_S9_MACS2_rendition_1E-8_downsampled_try3_peak_707	848	18.6429	84.8061	81.4686	188
chr1	53021497	53021807	Project004-IPSHOCH-Exp5-ChIP-ES-2i-CTCF-IP-Blobel-Rep2-S1_S9_MACS2_rendition_1E-8_downsampled_try3_peak_708	1164	35.9343	116.483	112.678	144
chr1	53089470	53089794	Project004-IPSHOCH-Exp5-ChIP-ES-2i-CTCF-IP-Blobel-Rep2-S1_S9_MACS2_rendition_1E-8_downsampled_try3_peak_709	485	20.5901	48.5837	45.7327	116
chr1	53109914	53110234	Project004-IPSHOCH-Exp5-ChIP-ES-2i-CTCF-IP-Blobel-Rep2-S1_S9_MACS2_rendition_1E-8_downsampled_try3_peak_710	666	19.6875	66.6649	63.5776	172
chr1	53150045	53150376	Project004-IPSHOCH-Exp5-ChIP-ES-2i-CTCF-IP-Blobel-Rep2-S1_S9_MACS2_rendition_1E-8_downsampled_try3_peak_711	320	13.3784	32.0676	29.4335	242
chr1	53329565	53329859	Project004-IPSHOCH-Exp5-ChIP-ES-2i-CTCF-IP-Blobel-Rep2-S1_S9_MACS2_rendition_1E-8_downsampled_try3_peak_712	453	19.5342	45.3151	42.5059	147
chr1	53409606	53409812	Project004-IPSHOCH-Exp5-ChIP-ES-2i-CTCF-IP-Blobel-Rep2-S1_S9_MACS2_rendition_1E-8_downsampled_try3_peak_713	343	15.1324	34.3807	31.7152	88
chr1	53679236	53679603	Project004-IPSHOCH-Exp5-ChIP-ES-2i-CTCF-IP-Blobel-Rep2-S1_S9_MACS2_rendition_1E-8_downsampled_try3_peak_714	363	9.62963	36.3204	33.6288	209
chr1	53761055	53761357	Project004-IPSHOCH-Exp5-ChIP-ES-2i-CTCF-IP-Blobel-Rep2-S1_S9_MACS2_rendition_1E-8_downsampled_try3_peak_715	614	23.9617	61.454	58.4378	148
chr1	53763209	53763468	Project004-IPSHOCH-Exp5-ChIP-ES-2i-CTCF-IP-Blobel-Rep2-S1_S9_MACS2_rendition_1E-8_downsampled_try3_peak_716	460	15.6333	46.0519	43.2374	129
chr1	53769275	53769464	Project004-IPSHOCH-Exp5-ChIP-ES-2i-CTCF-IP-Blobel-Rep2-S1_S9_MACS2_rendition_1E-8_downsampled_try3_peak_717	147	7.05611	14.759	12.3991	75
chr1	53772338	53772693	Project004-IPSHOCH-Exp5-ChIP-ES-2i-CTCF-IP-Blobel-Rep2-S1_S9_MACS2_rendition_1E-8_downsampled_try3_peak_718	785	22.1875	78.5596	75.3095	135
chr1	53947235	53947533	Project004-IPSHOCH-Exp5-ChIP-ES-2i-CTCF-IP-Blobel-Rep2-S1_S9_MACS2_rendition_1E-8_downsampled_try3_peak_719	655	25.8696	65.5462	62.4743	137
chr1	53966002	53966273	Project004-IPSHOCH-Exp5-ChIP-ES-2i-CTCF-IP-Blobel-Rep2-S1_S9_MACS2_rendition_1E-8_downsampled_try3_peak_720	751	21.8098	75.1396	71.9421	142
chr1	53984478	53984844	Project004-IPSHOCH-Exp5-ChIP-ES-2i-CTCF-IP-Blobel-Rep2-S1_S9_MACS2_rendition_1E-8_downsampled_try3_peak_721	672	26.3975	67.294	64.1994	151
chr1	54095990	54096261	Project004-IPSHOCH-Exp5-ChIP-ES-2i-CTCF-IP-Blobel-Rep2-S1_S9_MACS2_rendition_1E-8_downsampled_try3_peak_722	594	18.125	59.4496	56.4592	141
chr1	54332495	54332733	Project004-IPSHOCH-Exp5-ChIP-ES-2i-CTCF-IP-Blobel-Rep2-S1_S9_MACS2_rendition_1E-8_downsampled_try3_peak_723	218	7.5	21.8106	19.3251	96
chr1	54389928	54390160	Project004-IPSHOCH-Exp5-ChIP-ES-2i-CTCF-IP-Blobel-Rep2-S1_S9_MACS2_rendition_1E-8_downsampled_try3_peak_724	298	13.9776	29.8657	27.2618	137
chr1	54419536	54419783	Project004-IPSHOCH-Exp5-ChIP-ES-2i-CTCF-IP-Blobel-Rep2-S1_S9_MACS2_rendition_1E-8_downsampled_try3_peak_725	333	14.117	33.3334	30.6842	121
chr1	54430729	54430906	Project004-IPSHOCH-Exp5-ChIP-ES-2i-CTCF-IP-Blobel-Rep2-S1_S9_MACS2_rendition_1E-8_downsampled_try3_peak_726	157	8.97516	15.7436	13.3619	59
chr1	54438031	54438720	Project004-IPSHOCH-Exp5-ChIP-ES-2i-CTCF-IP-Blobel-Rep2-S1_S9_MACS2_rendition_1E-8_downsampled_try3_peak_727	971	25.9375	97.1189	93.6061	284
chr1	54534821	54535104	Project004-IPSHOCH-Exp5-ChIP-ES-2i-CTCF-IP-Blobel-Rep2-S1_S9_MACS2_rendition_1E-8_downsampled_try3_peak_728	242	9.6875	24.2245	21.699	144
chr1	54537395	54537564	Project004-IPSHOCH-Exp5-ChIP-ES-2i-CTCF-IP-Blobel-Rep2-S1_S9_MACS2_rendition_1E-8_downsampled_try3_peak_729	134	6.5625	13.4274	11.0962	63
chr1	54570737	54571054	Project004-IPSHOCH-Exp5-ChIP-ES-2i-CTCF-IP-Blobel-Rep2-S1_S9_MACS2_rendition_1E-8_downsampled_try3_peak_730	453	19.5342	45.3151	42.5059	166
chr1	54597991	54598172	Project004-IPSHOCH-Exp5-ChIP-ES-2i-CTCF-IP-Blobel-Rep2-S1_S9_MACS2_rendition_1E-8_downsampled_try3_peak_731	197	10.559	19.7277	17.2736	105
chr1	54722827	54723157	Project004-IPSHOCH-Exp5-ChIP-ES-2i-CTCF-IP-Blobel-Rep2-S1_S9_MACS2_rendition_1E-8_downsampled_try3_peak_732	823	26.7568	82.3854	79.0812	167
chr1	54763496	54763844	Project004-IPSHOCH-Exp5-ChIP-ES-2i-CTCF-IP-Blobel-Rep2-S1_S9_MACS2_rendition_1E-8_downsampled_try3_peak_733	982	35.3727	98.2011	94.6717	159
chr1	54793796	54794037	Project004-IPSHOCH-Exp5-ChIP-ES-2i-CTCF-IP-Blobel-Rep2-S1_S9_MACS2_rendition_1E-8_downsampled_try3_peak_734	301	11.25	30.1722	27.5636	149
chr1	54812714	54812921	Project004-IPSHOCH-Exp5-ChIP-ES-2i-CTCF-IP-Blobel-Rep2-S1_S9_MACS2_rendition_1E-8_downsampled_try3_peak_735	244	12.1157	24.4023	21.8761	90
chr1	54889700	54889896	Project004-IPSHOCH-Exp5-ChIP-ES-2i-CTCF-IP-Blobel-Rep2-S1_S9_MACS2_rendition_1E-8_downsampled_try3_peak_736	293	12.5676	29.3754	26.7781	108
chr1	54926775	54926962	Project004-IPSHOCH-Exp5-ChIP-ES-2i-CTCF-IP-Blobel-Rep2-S1_S9_MACS2_rendition_1E-8_downsampled_try3_peak_737	168	8.51351	16.8225	14.4247	131
chr1	54983191	54983396	Project004-IPSHOCH-Exp5-ChIP-ES-2i-CTCF-IP-Blobel-Rep2-S1_S9_MACS2_rendition_1E-8_downsampled_try3_peak_738	315	11.9744	31.5307	28.9036	122
chr1	54990132	54990313	Project004-IPSHOCH-Exp5-ChIP-ES-2i-CTCF-IP-Blobel-Rep2-S1_S9_MACS2_rendition_1E-8_downsampled_try3_peak_739	179	8.91892	17.9999	15.579	128
chr1	54991649	54991915	Project004-IPSHOCH-Exp5-ChIP-ES-2i-CTCF-IP-Blobel-Rep2-S1_S9_MACS2_rendition_1E-8_downsampled_try3_peak_740	307	12.973	30.7148	28.099	143
chr1	55015428	55015803	Project004-IPSHOCH-Exp5-ChIP-ES-2i-CTCF-IP-Blobel-Rep2-S1_S9_MACS2_rendition_1E-8_downsampled_try3_peak_741	823	26.7568	82.3854	79.0812	135
chr1	55040195	55040618	Project004-IPSHOCH-Exp5-ChIP-ES-2i-CTCF-IP-Blobel-Rep2-S1_S9_MACS2_rendition_1E-8_downsampled_try3_peak_742	598	21.0811	59.8822	56.8861	182
chr1	55065224	55065517	Project004-IPSHOCH-Exp5-ChIP-ES-2i-CTCF-IP-Blobel-Rep2-S1_S9_MACS2_rendition_1E-8_downsampled_try3_peak_743	448	13.2203	44.8531	42.052	151
chr1	55069387	55069745	Project004-IPSHOCH-Exp5-ChIP-ES-2i-CTCF-IP-Blobel-Rep2-S1_S9_MACS2_rendition_1E-8_downsampled_try3_peak_744	552	17.1875	55.2085	52.2758	180
chr1	55082576	55082754	Project004-IPSHOCH-Exp5-ChIP-ES-2i-CTCF-IP-Blobel-Rep2-S1_S9_MACS2_rendition_1E-8_downsampled_try3_peak_745	186	8.125	18.6213	16.1884	110
chr1	55090274	55090488	Project004-IPSHOCH-Exp5-ChIP-ES-2i-CTCF-IP-Blobel-Rep2-S1_S9_MACS2_rendition_1E-8_downsampled_try3_peak_746	239	10.479	23.9339	21.4157	107
chr1	55099122	55099465	Project004-IPSHOCH-Exp5-ChIP-ES-2i-CTCF-IP-Blobel-Rep2-S1_S9_MACS2_rendition_1E-8_downsampled_try3_peak_747	655	25.8696	65.5462	62.4743	146
chr1	55125344	55125704	Project004-IPSHOCH-Exp5-ChIP-ES-2i-CTCF-IP-Blobel-Rep2-S1_S9_MACS2_rendition_1E-8_downsampled_try3_peak_748	92	5.67568	9.20436	6.98949	85
chr1	55139002	55139240	Project004-IPSHOCH-Exp5-ChIP-ES-2i-CTCF-IP-Blobel-Rep2-S1_S9_MACS2_rendition_1E-8_downsampled_try3_peak_749	230	9.375	23.0745	20.5678	128
chr1	55144776	55144930	Project004-IPSHOCH-Exp5-ChIP-ES-2i-CTCF-IP-Blobel-Rep2-S1_S9_MACS2_rendition_1E-8_downsampled_try3_peak_750	205	9.47487	20.5125	18.0492	108
chr1	55172259	55172451	Project004-IPSHOCH-Exp5-ChIP-ES-2i-CTCF-IP-Blobel-Rep2-S1_S9_MACS2_rendition_1E-8_downsampled_try3_peak_751	168	9.0806	16.8061	14.4124	79
chr1	55192755	55193036	Project004-IPSHOCH-Exp5-ChIP-ES-2i-CTCF-IP-Blobel-Rep2-S1_S9_MACS2_rendition_1E-8_downsampled_try3_peak_752	676	25.0631	67.6073	64.5097	146
chr1	55218800	55219193	Project004-IPSHOCH-Exp5-ChIP-ES-2i-CTCF-IP-Blobel-Rep2-S1_S9_MACS2_rendition_1E-8_downsampled_try3_peak_753	973	22.8814	97.3691	93.8517	150
chr1	55237075	55237367	Project004-IPSHOCH-Exp5-ChIP-ES-2i-CTCF-IP-Blobel-Rep2-S1_S9_MACS2_rendition_1E-8_downsampled_try3_peak_754	383	14.5958	38.311	35.5958	127
chr1	55242638	55242864	Project004-IPSHOCH-Exp5-ChIP-ES-2i-CTCF-IP-Blobel-Rep2-S1_S9_MACS2_rendition_1E-8_downsampled_try3_peak_755	156	6.61017	15.6784	13.3037	100
chr1	55249648	55250096	Project004-IPSHOCH-Exp5-ChIP-ES-2i-CTCF-IP-Blobel-Rep2-S1_S9_MACS2_rendition_1E-8_downsampled_try3_peak_756	1495	39.1598	149.539	145.22	188
chr1	55260733	55260928	Project004-IPSHOCH-Exp5-ChIP-ES-2i-CTCF-IP-Blobel-Rep2-S1_S9_MACS2_rendition_1E-8_downsampled_try3_peak_757	247	10.9352	24.7263	22.1977	81
chr1	55269687	55269917	Project004-IPSHOCH-Exp5-ChIP-ES-2i-CTCF-IP-Blobel-Rep2-S1_S9_MACS2_rendition_1E-8_downsampled_try3_peak_758	245	11.8848	24.5816	22.0541	130
chr1	55270216	55270428	Project004-IPSHOCH-Exp5-ChIP-ES-2i-CTCF-IP-Blobel-Rep2-S1_S9_MACS2_rendition_1E-8_downsampled_try3_peak_759	273	12.8356	27.3437	24.7755	90
chr1	55296090	55296459	Project004-IPSHOCH-Exp5-ChIP-ES-2i-CTCF-IP-Blobel-Rep2-S1_S9_MACS2_rendition_1E-8_downsampled_try3_peak_760	623	18.75	62.3143	59.2839	232
chr1	55322365	55322569	Project004-IPSHOCH-Exp5-ChIP-ES-2i-CTCF-IP-Blobel-Rep2-S1_S9_MACS2_rendition_1E-8_downsampled_try3_peak_761	293	12.5676	29.3754	26.7781	77
chr1	55350625	55350815	Project004-IPSHOCH-Exp5-ChIP-ES-2i-CTCF-IP-Blobel-Rep2-S1_S9_MACS2_rendition_1E-8_downsampled_try3_peak_762	284	13.4784	28.4194	25.8343	78
chr1	55357964	55358260	Project004-IPSHOCH-Exp5-ChIP-ES-2i-CTCF-IP-Blobel-Rep2-S1_S9_MACS2_rendition_1E-8_downsampled_try3_peak_763	569	23.2298	56.9428	53.9834	144
chr1	55420049	55420518	Project004-IPSHOCH-Exp5-ChIP-ES-2i-CTCF-IP-Blobel-Rep2-S1_S9_MACS2_rendition_1E-8_downsampled_try3_peak_764	721	21.6205	72.1171	68.9609	238
chr1	55440001	55440385	Project004-IPSHOCH-Exp5-ChIP-ES-2i-CTCF-IP-Blobel-Rep2-S1_S9_MACS2_rendition_1E-8_downsampled_try3_peak_765	1346	38.9189	134.659	130.569	192
chr1	55461248	55461584	Project004-IPSHOCH-Exp5-ChIP-ES-2i-CTCF-IP-Blobel-Rep2-S1_S9_MACS2_rendition_1E-8_downsampled_try3_peak_766	840	27.1622	84.0452	80.719	139
chr1	55486626	55486879	Project004-IPSHOCH-Exp5-ChIP-ES-2i-CTCF-IP-Blobel-Rep2-S1_S9_MACS2_rendition_1E-8_downsampled_try3_peak_767	239	12.1429	23.9023	21.3845	135
chr1	55504547	55504833	Project004-IPSHOCH-Exp5-ChIP-ES-2i-CTCF-IP-Blobel-Rep2-S1_S9_MACS2_rendition_1E-8_downsampled_try3_peak_768	518	21.646	51.8962	49.0047	144
chr1	55530718	55530998	Project004-IPSHOCH-Exp5-ChIP-ES-2i-CTCF-IP-Blobel-Rep2-S1_S9_MACS2_rendition_1E-8_downsampled_try3_peak_769	298	12.4974	29.8922	27.2877	144
chr1	55641706	55641871	Project004-IPSHOCH-Exp5-ChIP-ES-2i-CTCF-IP-Blobel-Rep2-S1_S9_MACS2_rendition_1E-8_downsampled_try3_peak_770	224	11.6149	22.4912	19.9952	68
chr1	55793260	55793559	Project004-IPSHOCH-Exp5-ChIP-ES-2i-CTCF-IP-Blobel-Rep2-S1_S9_MACS2_rendition_1E-8_downsampled_try3_peak_771	693	23.5135	69.35	66.2263	116
chr1	55812618	55812944	Project004-IPSHOCH-Exp5-ChIP-ES-2i-CTCF-IP-Blobel-Rep2-S1_S9_MACS2_rendition_1E-8_downsampled_try3_peak_772	870	32.205	87.0524	83.6864	189
chr1	55895005	55895546	Project004-IPSHOCH-Exp5-ChIP-ES-2i-CTCF-IP-Blobel-Rep2-S1_S9_MACS2_rendition_1E-8_downsampled_try3_peak_773	637	19.0625	63.7575	60.7106	253
chr1	55931054	55931944	Project004-IPSHOCH-Exp5-ChIP-ES-2i-CTCF-IP-Blobel-Rep2-S1_S9_MACS2_rendition_1E-8_downsampled_try3_peak_774	1004	34.9441	100.411	96.8463	171
chr1	55943291	55943573	Project004-IPSHOCH-Exp5-ChIP-ES-2i-CTCF-IP-Blobel-Rep2-S1_S9_MACS2_rendition_1E-8_downsampled_try3_peak_775	492	18.2432	49.2158	46.3584	130
chr1	55947604	55947884	Project004-IPSHOCH-Exp5-ChIP-ES-2i-CTCF-IP-Blobel-Rep2-S1_S9_MACS2_rendition_1E-8_downsampled_try3_peak_776	357	16.3665	35.7978	33.1142	129
chr1	55962182	55962422	Project004-IPSHOCH-Exp5-ChIP-ES-2i-CTCF-IP-Blobel-Rep2-S1_S9_MACS2_rendition_1E-8_downsampled_try3_peak_777	404	17.9503	40.4998	37.7504	112
chr1	56017141	56017520	Project004-IPSHOCH-Exp5-ChIP-ES-2i-CTCF-IP-Blobel-Rep2-S1_S9_MACS2_rendition_1E-8_downsampled_try3_peak_778	790	25.9459	79.0852	75.8275	181
chr1	56252142	56252418	Project004-IPSHOCH-Exp5-ChIP-ES-2i-CTCF-IP-Blobel-Rep2-S1_S9_MACS2_rendition_1E-8_downsampled_try3_peak_779	586	23.7578	58.6448	55.6626	124
chr1	56401049	56401219	Project004-IPSHOCH-Exp5-ChIP-ES-2i-CTCF-IP-Blobel-Rep2-S1_S9_MACS2_rendition_1E-8_downsampled_try3_peak_780	144	8.44721	14.4632	12.1115	67
chr1	56624501	56624680	Project004-IPSHOCH-Exp5-ChIP-ES-2i-CTCF-IP-Blobel-Rep2-S1_S9_MACS2_rendition_1E-8_downsampled_try3_peak_781	253	12.6708	25.3317	22.7939	98
chr1	56810173	56810454	Project004-IPSHOCH-Exp5-ChIP-ES-2i-CTCF-IP-Blobel-Rep2-S1_S9_MACS2_rendition_1E-8_downsampled_try3_peak_782	320	13.3784	32.0676	29.4335	139
chr1	56949664	56949827	Project004-IPSHOCH-Exp5-ChIP-ES-2i-CTCF-IP-Blobel-Rep2-S1_S9_MACS2_rendition_1E-8_downsampled_try3_peak_783	210	11.087	21.0994	18.6237	93
chr1	57033881	57034301	Project004-IPSHOCH-Exp5-ChIP-ES-2i-CTCF-IP-Blobel-Rep2-S1_S9_MACS2_rendition_1E-8_downsampled_try3_peak_784	918	24.2457	91.8487	88.4124	256
chr1	57048581	57048787	Project004-IPSHOCH-Exp5-ChIP-ES-2i-CTCF-IP-Blobel-Rep2-S1_S9_MACS2_rendition_1E-8_downsampled_try3_peak_785	464	18.9155	46.498	43.6758	84
chr1	57057302	57057524	Project004-IPSHOCH-Exp5-ChIP-ES-2i-CTCF-IP-Blobel-Rep2-S1_S9_MACS2_rendition_1E-8_downsampled_try3_peak_786	376	15	37.6044	34.895	112
chr1	57060085	57060342	Project004-IPSHOCH-Exp5-ChIP-ES-2i-CTCF-IP-Blobel-Rep2-S1_S9_MACS2_rendition_1E-8_downsampled_try3_peak_787	404	17.9503	40.4998	37.7504	118
chr1	57152499	57152685	Project004-IPSHOCH-Exp5-ChIP-ES-2i-CTCF-IP-Blobel-Rep2-S1_S9_MACS2_rendition_1E-8_downsampled_try3_peak_788	183	10.0311	18.3771	15.9485	74
chr1	57191715	57191920	Project004-IPSHOCH-Exp5-ChIP-ES-2i-CTCF-IP-Blobel-Rep2-S1_S9_MACS2_rendition_1E-8_downsampled_try3_peak_789	253	12.6708	25.3317	22.7939	115
chr1	57262536	57262850	Project004-IPSHOCH-Exp5-ChIP-ES-2i-CTCF-IP-Blobel-Rep2-S1_S9_MACS2_rendition_1E-8_downsampled_try3_peak_790	1076	38.0124	107.67	104	153
chr1	57302560	57302728	Project004-IPSHOCH-Exp5-ChIP-ES-2i-CTCF-IP-Blobel-Rep2-S1_S9_MACS2_rendition_1E-8_downsampled_try3_peak_791	156	8.10811	15.6651	13.2917	52
chr1	57325843	57326002	Project004-IPSHOCH-Exp5-ChIP-ES-2i-CTCF-IP-Blobel-Rep2-S1_S9_MACS2_rendition_1E-8_downsampled_try3_peak_792	225	10.6947	22.5905	20.0935	91
chr1	57326672	57326929	Project004-IPSHOCH-Exp5-ChIP-ES-2i-CTCF-IP-Blobel-Rep2-S1_S9_MACS2_rendition_1E-8_downsampled_try3_peak_793	507	18.6486	50.7125	47.8363	122
chr1	57338465	57338620	Project004-IPSHOCH-Exp5-ChIP-ES-2i-CTCF-IP-Blobel-Rep2-S1_S9_MACS2_rendition_1E-8_downsampled_try3_peak_794	114	5.9375	11.4842	9.20227	52
chr1	57396020	57396341	Project004-IPSHOCH-Exp5-ChIP-ES-2i-CTCF-IP-Blobel-Rep2-S1_S9_MACS2_rendition_1E-8_downsampled_try3_peak_795	686	17.7966	68.6187	65.5073	186
chr1	57450887	57451433	Project004-IPSHOCH-Exp5-ChIP-ES-2i-CTCF-IP-Blobel-Rep2-S1_S9_MACS2_rendition_1E-8_downsampled_try3_peak_796	1111	34.6509	111.105	107.384	184
chr1	57480590	57480797	Project004-IPSHOCH-Exp5-ChIP-ES-2i-CTCF-IP-Blobel-Rep2-S1_S9_MACS2_rendition_1E-8_downsampled_try3_peak_797	353	12.9723	35.3644	32.6869	69
chr1	57485741	57486101	Project004-IPSHOCH-Exp5-ChIP-ES-2i-CTCF-IP-Blobel-Rep2-S1_S9_MACS2_rendition_1E-8_downsampled_try3_peak_798	861	17.2222	86.1122	82.758	187
chr1	57745677	57745884	Project004-IPSHOCH-Exp5-ChIP-ES-2i-CTCF-IP-Blobel-Rep2-S1_S9_MACS2_rendition_1E-8_downsampled_try3_peak_799	134	7.2973	13.4146	11.0861	93
chr1	57830855	57831080	Project004-IPSHOCH-Exp5-ChIP-ES-2i-CTCF-IP-Blobel-Rep2-S1_S9_MACS2_rendition_1E-8_downsampled_try3_peak_800	147	6.35593	14.7288	12.369	127
chr1	57831860	57832241	Project004-IPSHOCH-Exp5-ChIP-ES-2i-CTCF-IP-Blobel-Rep2-S1_S9_MACS2_rendition_1E-8_downsampled_try3_peak_801	196	8.98161	19.6528	17.2063	246
chr1	58006153	58006408	Project004-IPSHOCH-Exp5-ChIP-ES-2i-CTCF-IP-Blobel-Rep2-S1_S9_MACS2_rendition_1E-8_downsampled_try3_peak_802	433	16.6216	43.3264	40.5461	107
chr1	58026673	58027285	Project004-IPSHOCH-Exp5-ChIP-ES-2i-CTCF-IP-Blobel-Rep2-S1_S9_MACS2_rendition_1E-8_downsampled_try3_peak_803	1495	39.1598	149.539	145.22	317
chr1	58087973	58088382	Project004-IPSHOCH-Exp5-ChIP-ES-2i-CTCF-IP-Blobel-Rep2-S1_S9_MACS2_rendition_1E-8_downsampled_try3_peak_804	1182	36.3621	118.286	114.454	235
chr1	58136548	58136872	Project004-IPSHOCH-Exp5-ChIP-ES-2i-CTCF-IP-Blobel-Rep2-S1_S9_MACS2_rendition_1E-8_downsampled_try3_peak_805	376	15	37.6044	34.895	188
chr1	58146431	58146635	Project004-IPSHOCH-Exp5-ChIP-ES-2i-CTCF-IP-Blobel-Rep2-S1_S9_MACS2_rendition_1E-8_downsampled_try3_peak_806	234	10.5447	23.4715	20.9621	80
chr1	58169687	58170041	Project004-IPSHOCH-Exp5-ChIP-ES-2i-CTCF-IP-Blobel-Rep2-S1_S9_MACS2_rendition_1E-8_downsampled_try3_peak_807	1256	36.8919	125.625	121.674	148
chr1	58195895	58196180	Project004-IPSHOCH-Exp5-ChIP-ES-2i-CTCF-IP-Blobel-Rep2-S1_S9_MACS2_rendition_1E-8_downsampled_try3_peak_808	570	19.4611	57.0106	54.05	136
chr1	58197512	58197746	Project004-IPSHOCH-Exp5-ChIP-ES-2i-CTCF-IP-Blobel-Rep2-S1_S9_MACS2_rendition_1E-8_downsampled_try3_peak_809	228	7.71429	22.804	20.304	147
chr1	58213640	58213911	Project004-IPSHOCH-Exp5-ChIP-ES-2i-CTCF-IP-Blobel-Rep2-S1_S9_MACS2_rendition_1E-8_downsampled_try3_peak_810	874	24.3756	87.4148	84.0404	120
chr1	58292362	58292548	Project004-IPSHOCH-Exp5-ChIP-ES-2i-CTCF-IP-Blobel-Rep2-S1_S9_MACS2_rendition_1E-8_downsampled_try3_peak_811	224	11.6149	22.4912	19.9952	109
chr1	58297167	58297398	Project004-IPSHOCH-Exp5-ChIP-ES-2i-CTCF-IP-Blobel-Rep2-S1_S9_MACS2_rendition_1E-8_downsampled_try3_peak_812	114	5.9375	11.4842	9.20227	121
chr1	58328074	58328389	Project004-IPSHOCH-Exp5-ChIP-ES-2i-CTCF-IP-Blobel-Rep2-S1_S9_MACS2_rendition_1E-8_downsampled_try3_peak_813	709	23.9189	70.9547	67.8104	109
chr1	58353224	58353555	Project004-IPSHOCH-Exp5-ChIP-ES-2i-CTCF-IP-Blobel-Rep2-S1_S9_MACS2_rendition_1E-8_downsampled_try3_peak_814	892	24.375	89.2882	85.8842	157
chr1	58363750	58363902	Project004-IPSHOCH-Exp5-ChIP-ES-2i-CTCF-IP-Blobel-Rep2-S1_S9_MACS2_rendition_1E-8_downsampled_try3_peak_815	151	8.63049	15.175	12.8115	54
chr1	58452346	58452607	Project004-IPSHOCH-Exp5-ChIP-ES-2i-CTCF-IP-Blobel-Rep2-S1_S9_MACS2_rendition_1E-8_downsampled_try3_peak_816	308	13.0662	30.8752	28.2586	96
chr1	58453101	58453356	Project004-IPSHOCH-Exp5-ChIP-ES-2i-CTCF-IP-Blobel-Rep2-S1_S9_MACS2_rendition_1E-8_downsampled_try3_peak_817	415	16.4485	41.5449	38.7897	148
chr1	58472413	58472705	Project004-IPSHOCH-Exp5-ChIP-ES-2i-CTCF-IP-Blobel-Rep2-S1_S9_MACS2_rendition_1E-8_downsampled_try3_peak_818	554	21.856	55.4085	52.4689	144
chr1	58505346	58505595	Project004-IPSHOCH-Exp5-ChIP-ES-2i-CTCF-IP-Blobel-Rep2-S1_S9_MACS2_rendition_1E-8_downsampled_try3_peak_819	507	16.1024	50.7511	47.8746	111
chr1	58555656	58556036	Project004-IPSHOCH-Exp5-ChIP-ES-2i-CTCF-IP-Blobel-Rep2-S1_S9_MACS2_rendition_1E-8_downsampled_try3_peak_820	524	18.7461	52.4805	49.58	141
chr1	58617251	58617576	Project004-IPSHOCH-Exp5-ChIP-ES-2i-CTCF-IP-Blobel-Rep2-S1_S9_MACS2_rendition_1E-8_downsampled_try3_peak_821	267	13.1988	26.7789	24.2164	226
chr1	58619319	58619617	Project004-IPSHOCH-Exp5-ChIP-ES-2i-CTCF-IP-Blobel-Rep2-S1_S9_MACS2_rendition_1E-8_downsampled_try3_peak_822	681	20	68.1289	65.0212	163
chr1	58636045	58636424	Project004-IPSHOCH-Exp5-ChIP-ES-2i-CTCF-IP-Blobel-Rep2-S1_S9_MACS2_rendition_1E-8_downsampled_try3_peak_823	1075	33.7953	107.545	103.879	187
chr1	58641228	58641380	Project004-IPSHOCH-Exp5-ChIP-ES-2i-CTCF-IP-Blobel-Rep2-S1_S9_MACS2_rendition_1E-8_downsampled_try3_peak_824	112	6.48649	11.2573	8.98216	66
chr1	58675689	58676027	Project004-IPSHOCH-Exp5-ChIP-ES-2i-CTCF-IP-Blobel-Rep2-S1_S9_MACS2_rendition_1E-8_downsampled_try3_peak_825	533	21.1414	53.3913	50.483	110
chr1	58734505	58734794	Project004-IPSHOCH-Exp5-ChIP-ES-2i-CTCF-IP-Blobel-Rep2-S1_S9_MACS2_rendition_1E-8_downsampled_try3_peak_826	313	11.5625	31.3987	28.7727	125
chr1	58754546	58754797	Project004-IPSHOCH-Exp5-ChIP-ES-2i-CTCF-IP-Blobel-Rep2-S1_S9_MACS2_rendition_1E-8_downsampled_try3_peak_827	796	22.772	79.6977	76.436	132
chr1	58803796	58804128	Project004-IPSHOCH-Exp5-ChIP-ES-2i-CTCF-IP-Blobel-Rep2-S1_S9_MACS2_rendition_1E-8_downsampled_try3_peak_828	508	13.0714	50.8509	47.9737	133
chr1	58826964	58827140	Project004-IPSHOCH-Exp5-ChIP-ES-2i-CTCF-IP-Blobel-Rep2-S1_S9_MACS2_rendition_1E-8_downsampled_try3_peak_829	339	13.669	33.9082	31.2508	59
chr1	58859346	58859613	Project004-IPSHOCH-Exp5-ChIP-ES-2i-CTCF-IP-Blobel-Rep2-S1_S9_MACS2_rendition_1E-8_downsampled_try3_peak_830	453	19.5342	45.3151	42.5059	122
chr1	58954447	58954808	Project004-IPSHOCH-Exp5-ChIP-ES-2i-CTCF-IP-Blobel-Rep2-S1_S9_MACS2_rendition_1E-8_downsampled_try3_peak_831	761	29.0373	76.1583	72.9404	179
chr1	59050704	59050928	Project004-IPSHOCH-Exp5-ChIP-ES-2i-CTCF-IP-Blobel-Rep2-S1_S9_MACS2_rendition_1E-8_downsampled_try3_peak_832	179	8.91892	17.9999	15.579	89
chr1	59066147	59066375	Project004-IPSHOCH-Exp5-ChIP-ES-2i-CTCF-IP-Blobel-Rep2-S1_S9_MACS2_rendition_1E-8_downsampled_try3_peak_833	176	7.11864	17.6258	15.2116	107
chr1	59124929	59125087	Project004-IPSHOCH-Exp5-ChIP-ES-2i-CTCF-IP-Blobel-Rep2-S1_S9_MACS2_rendition_1E-8_downsampled_try3_peak_834	154	7.1875	15.4506	13.0818	91
chr1	59127712	59128288	Project004-IPSHOCH-Exp5-ChIP-ES-2i-CTCF-IP-Blobel-Rep2-S1_S9_MACS2_rendition_1E-8_downsampled_try3_peak_835	958	30	95.8394	92.3435	167
chr1	59199677	59200009	Project004-IPSHOCH-Exp5-ChIP-ES-2i-CTCF-IP-Blobel-Rep2-S1_S9_MACS2_rendition_1E-8_downsampled_try3_peak_836	957	34.4823	95.7036	92.2125	178
chr1	59201436	59201704	Project004-IPSHOCH-Exp5-ChIP-ES-2i-CTCF-IP-Blobel-Rep2-S1_S9_MACS2_rendition_1E-8_downsampled_try3_peak_837	615	20.1188	61.5418	58.5246	135
chr1	59207491	59207677	Project004-IPSHOCH-Exp5-ChIP-ES-2i-CTCF-IP-Blobel-Rep2-S1_S9_MACS2_rendition_1E-8_downsampled_try3_peak_838	282	13.7267	28.2431	25.6591	104
chr1	59233416	59233605	Project004-IPSHOCH-Exp5-ChIP-ES-2i-CTCF-IP-Blobel-Rep2-S1_S9_MACS2_rendition_1E-8_downsampled_try3_peak_839	210	11.087	21.0994	18.6237	104
chr1	59294863	59295109	Project004-IPSHOCH-Exp5-ChIP-ES-2i-CTCF-IP-Blobel-Rep2-S1_S9_MACS2_rendition_1E-8_downsampled_try3_peak_840	446	15.3007	44.6818	41.8864	115
chr1	59300702	59300910	Project004-IPSHOCH-Exp5-ChIP-ES-2i-CTCF-IP-Blobel-Rep2-S1_S9_MACS2_rendition_1E-8_downsampled_try3_peak_841	342	15.8385	34.2574	31.5934	97
chr1	59304406	59304798	Project004-IPSHOCH-Exp5-ChIP-ES-2i-CTCF-IP-Blobel-Rep2-S1_S9_MACS2_rendition_1E-8_downsampled_try3_peak_842	975	30.4054	97.5482	94.025	246
chr1	59343386	59343613	Project004-IPSHOCH-Exp5-ChIP-ES-2i-CTCF-IP-Blobel-Rep2-S1_S9_MACS2_rendition_1E-8_downsampled_try3_peak_843	411	12.4576	41.1311	38.3776	99
chr1	59357842	59358103	Project004-IPSHOCH-Exp5-ChIP-ES-2i-CTCF-IP-Blobel-Rep2-S1_S9_MACS2_rendition_1E-8_downsampled_try3_peak_844	535	22.1739	53.5683	50.6563	116
chr1	59373631	59373938	Project004-IPSHOCH-Exp5-ChIP-ES-2i-CTCF-IP-Blobel-Rep2-S1_S9_MACS2_rendition_1E-8_downsampled_try3_peak_845	677	23.1081	67.7527	64.6507	111
chr1	59481093	59481294	Project004-IPSHOCH-Exp5-ChIP-ES-2i-CTCF-IP-Blobel-Rep2-S1_S9_MACS2_rendition_1E-8_downsampled_try3_peak_846	135	7.63656	13.5479	11.2141	78
chr1	59498042	59498242	Project004-IPSHOCH-Exp5-ChIP-ES-2i-CTCF-IP-Blobel-Rep2-S1_S9_MACS2_rendition_1E-8_downsampled_try3_peak_847	175	7.8125	17.5473	15.135	65
chr1	59510338	59510532	Project004-IPSHOCH-Exp5-ChIP-ES-2i-CTCF-IP-Blobel-Rep2-S1_S9_MACS2_rendition_1E-8_downsampled_try3_peak_848	188	9.72558	18.8406	16.4049	80
chr1	59528543	59528752	Project004-IPSHOCH-Exp5-ChIP-ES-2i-CTCF-IP-Blobel-Rep2-S1_S9_MACS2_rendition_1E-8_downsampled_try3_peak_849	254	11.3514	25.4413	22.8977	133
chr1	59540618	59540877	Project004-IPSHOCH-Exp5-ChIP-ES-2i-CTCF-IP-Blobel-Rep2-S1_S9_MACS2_rendition_1E-8_downsampled_try3_peak_850	510	17.9641	51.0896	48.2066	145
chr1	59580259	59580574	Project004-IPSHOCH-Exp5-ChIP-ES-2i-CTCF-IP-Blobel-Rep2-S1_S9_MACS2_rendition_1E-8_downsampled_try3_peak_851	709	23.9189	70.9547	67.8104	148
chr1	59620317	59620494	Project004-IPSHOCH-Exp5-ChIP-ES-2i-CTCF-IP-Blobel-Rep2-S1_S9_MACS2_rendition_1E-8_downsampled_try3_peak_852	191	9.32432	19.1965	16.7542	99
chr1	59621519	59621671	Project004-IPSHOCH-Exp5-ChIP-ES-2i-CTCF-IP-Blobel-Rep2-S1_S9_MACS2_rendition_1E-8_downsampled_try3_peak_853	170	9.50311	17.0487	14.6428	64
chr1	59637846	59638022	Project004-IPSHOCH-Exp5-ChIP-ES-2i-CTCF-IP-Blobel-Rep2-S1_S9_MACS2_rendition_1E-8_downsampled_try3_peak_854	238	11.4598	23.8724	21.3596	78
chr1	59641461	59641886	Project004-IPSHOCH-Exp5-ChIP-ES-2i-CTCF-IP-Blobel-Rep2-S1_S9_MACS2_rendition_1E-8_downsampled_try3_peak_855	1241	30.9661	124.111	120.185	223
chr1	59660865	59661147	Project004-IPSHOCH-Exp5-ChIP-ES-2i-CTCF-IP-Blobel-Rep2-S1_S9_MACS2_rendition_1E-8_downsampled_try3_peak_856	696	23.6825	69.6466	66.518	137
chr1	59665736	59666110	Project004-IPSHOCH-Exp5-ChIP-ES-2i-CTCF-IP-Blobel-Rep2-S1_S9_MACS2_rendition_1E-8_downsampled_try3_peak_857	695	20.3125	69.5996	66.4715	171
chr1	59666271	59666636	Project004-IPSHOCH-Exp5-ChIP-ES-2i-CTCF-IP-Blobel-Rep2-S1_S9_MACS2_rendition_1E-8_downsampled_try3_peak_858	1201	31.5993	120.147	116.286	190
chr1	59667838	59668134	Project004-IPSHOCH-Exp5-ChIP-ES-2i-CTCF-IP-Blobel-Rep2-S1_S9_MACS2_rendition_1E-8_downsampled_try3_peak_859	774	25.5405	77.4452	74.2101	140
chr1	59670588	59671142	Project004-IPSHOCH-Exp5-ChIP-ES-2i-CTCF-IP-Blobel-Rep2-S1_S9_MACS2_rendition_1E-8_downsampled_try3_peak_860	2123	46.875	212.342	207.206	267
chr1	59680232	59680542	Project004-IPSHOCH-Exp5-ChIP-ES-2i-CTCF-IP-Blobel-Rep2-S1_S9_MACS2_rendition_1E-8_downsampled_try3_peak_861	959	20.3571	95.9838	92.4846	146
chr1	59683803	59684270	Project004-IPSHOCH-Exp5-ChIP-ES-2i-CTCF-IP-Blobel-Rep2-S1_S9_MACS2_rendition_1E-8_downsampled_try3_peak_862	247	11.6212	24.7185	22.1905	367
chr1	59687681	59687867	Project004-IPSHOCH-Exp5-ChIP-ES-2i-CTCF-IP-Blobel-Rep2-S1_S9_MACS2_rendition_1E-8_downsampled_try3_peak_863	146	7.48503	14.6116	12.2549	137
chr1	59695290	59695560	Project004-IPSHOCH-Exp5-ChIP-ES-2i-CTCF-IP-Blobel-Rep2-S1_S9_MACS2_rendition_1E-8_downsampled_try3_peak_864	246	11.229	24.6417	22.1139	137
chr1	59718148	59718491	Project004-IPSHOCH-Exp5-ChIP-ES-2i-CTCF-IP-Blobel-Rep2-S1_S9_MACS2_rendition_1E-8_downsampled_try3_peak_865	348	14.1892	34.8116	32.1402	177
chr1	59746391	59746605	Project004-IPSHOCH-Exp5-ChIP-ES-2i-CTCF-IP-Blobel-Rep2-S1_S9_MACS2_rendition_1E-8_downsampled_try3_peak_866	326	11.875	32.6367	29.9974	147
chr1	59747436	59747693	Project004-IPSHOCH-Exp5-ChIP-ES-2i-CTCF-IP-Blobel-Rep2-S1_S9_MACS2_rendition_1E-8_downsampled_try3_peak_867	482	15.625	48.2983	45.4524	135
chr1	59752094	59752301	Project004-IPSHOCH-Exp5-ChIP-ES-2i-CTCF-IP-Blobel-Rep2-S1_S9_MACS2_rendition_1E-8_downsampled_try3_peak_868	129	7.27242	12.951	10.6377	64
chr1	59754029	59754205	Project004-IPSHOCH-Exp5-ChIP-ES-2i-CTCF-IP-Blobel-Rep2-S1_S9_MACS2_rendition_1E-8_downsampled_try3_peak_869	123	6.89189	12.3237	10.0212	46
chr1	59758652	59758907	Project004-IPSHOCH-Exp5-ChIP-ES-2i-CTCF-IP-Blobel-Rep2-S1_S9_MACS2_rendition_1E-8_downsampled_try3_peak_870	710	20.625	71.0769	67.9279	121
chr1	59776828	59777112	Project004-IPSHOCH-Exp5-ChIP-ES-2i-CTCF-IP-Blobel-Rep2-S1_S9_MACS2_rendition_1E-8_downsampled_try3_peak_871	799	20.6791	79.9428	76.6744	140
chr1	59806534	59806881	Project004-IPSHOCH-Exp5-ChIP-ES-2i-CTCF-IP-Blobel-Rep2-S1_S9_MACS2_rendition_1E-8_downsampled_try3_peak_872	1018	23.6441	101.859	98.2773	196
chr1	59840954	59841151	Project004-IPSHOCH-Exp5-ChIP-ES-2i-CTCF-IP-Blobel-Rep2-S1_S9_MACS2_rendition_1E-8_downsampled_try3_peak_873	186	7.37288	18.6225	16.1885	81
chr1	59846838	59847158	Project004-IPSHOCH-Exp5-ChIP-ES-2i-CTCF-IP-Blobel-Rep2-S1_S9_MACS2_rendition_1E-8_downsampled_try3_peak_874	280	12.1622	28.0497	25.4722	151
chr1	59869569	59869893	Project004-IPSHOCH-Exp5-ChIP-ES-2i-CTCF-IP-Blobel-Rep2-S1_S9_MACS2_rendition_1E-8_downsampled_try3_peak_875	352	14.0596	35.2717	32.5947	225
chr1	59893524	59893676	Project004-IPSHOCH-Exp5-ChIP-ES-2i-CTCF-IP-Blobel-Rep2-S1_S9_MACS2_rendition_1E-8_downsampled_try3_peak_876	132	7.91925	13.209	10.8855	91
chr1	59919447	59919726	Project004-IPSHOCH-Exp5-ChIP-ES-2i-CTCF-IP-Blobel-Rep2-S1_S9_MACS2_rendition_1E-8_downsampled_try3_peak_877	473	13.7288	47.376	44.5418	143
chr1	59940601	59940979	Project004-IPSHOCH-Exp5-ChIP-ES-2i-CTCF-IP-Blobel-Rep2-S1_S9_MACS2_rendition_1E-8_downsampled_try3_peak_878	959	20.3571	95.9838	92.4846	180
chr1	59949674	59949929	Project004-IPSHOCH-Exp5-ChIP-ES-2i-CTCF-IP-Blobel-Rep2-S1_S9_MACS2_rendition_1E-8_downsampled_try3_peak_879	386	11.9491	38.6933	35.9754	121
chr1	59966261	59966476	Project004-IPSHOCH-Exp5-ChIP-ES-2i-CTCF-IP-Blobel-Rep2-S1_S9_MACS2_rendition_1E-8_downsampled_try3_peak_880	279	12.4653	27.9449	25.3711	107
chr1	60024244	60024476	Project004-IPSHOCH-Exp5-ChIP-ES-2i-CTCF-IP-Blobel-Rep2-S1_S9_MACS2_rendition_1E-8_downsampled_try3_peak_881	512	20.3342	51.2269	48.3414	111
chr1	60030005	60030224	Project004-IPSHOCH-Exp5-ChIP-ES-2i-CTCF-IP-Blobel-Rep2-S1_S9_MACS2_rendition_1E-8_downsampled_try3_peak_882	272	13.1253	27.2333	24.666	105
chr1	60052498	60052821	Project004-IPSHOCH-Exp5-ChIP-ES-2i-CTCF-IP-Blobel-Rep2-S1_S9_MACS2_rendition_1E-8_downsampled_try3_peak_883	635	22.6728	63.5057	60.4622	188
chr1	60057410	60057640	Project004-IPSHOCH-Exp5-ChIP-ES-2i-CTCF-IP-Blobel-Rep2-S1_S9_MACS2_rendition_1E-8_downsampled_try3_peak_884	336	13.8828	33.6041	30.9503	81
chr1	60062385	60062624	Project004-IPSHOCH-Exp5-ChIP-ES-2i-CTCF-IP-Blobel-Rep2-S1_S9_MACS2_rendition_1E-8_downsampled_try3_peak_885	307	12.973	30.7148	28.099	132
chr1	60065509	60065716	Project004-IPSHOCH-Exp5-ChIP-ES-2i-CTCF-IP-Blobel-Rep2-S1_S9_MACS2_rendition_1E-8_downsampled_try3_peak_886	255	11.4329	25.5808	23.0359	114
chr1	60092343	60092526	Project004-IPSHOCH-Exp5-ChIP-ES-2i-CTCF-IP-Blobel-Rep2-S1_S9_MACS2_rendition_1E-8_downsampled_try3_peak_887	193	9.39133	19.3098	16.8668	92
chr1	60111439	60111874	Project004-IPSHOCH-Exp5-ChIP-ES-2i-CTCF-IP-Blobel-Rep2-S1_S9_MACS2_rendition_1E-8_downsampled_try3_peak_888	833	31.1491	83.3915	80.0737	251
chr1	60161397	60161827	Project004-IPSHOCH-Exp5-ChIP-ES-2i-CTCF-IP-Blobel-Rep2-S1_S9_MACS2_rendition_1E-8_downsampled_try3_peak_889	555	20.5339	55.5991	52.6572	239
chr1	60209665	60209864	Project004-IPSHOCH-Exp5-ChIP-ES-2i-CTCF-IP-Blobel-Rep2-S1_S9_MACS2_rendition_1E-8_downsampled_try3_peak_890	402	13.75	40.2917	37.5523	85
chr1	60215341	60215568	Project004-IPSHOCH-Exp5-ChIP-ES-2i-CTCF-IP-Blobel-Rep2-S1_S9_MACS2_rendition_1E-8_downsampled_try3_peak_891	325	13.2785	32.5568	29.9198	112
chr1	60224257	60224430	Project004-IPSHOCH-Exp5-ChIP-ES-2i-CTCF-IP-Blobel-Rep2-S1_S9_MACS2_rendition_1E-8_downsampled_try3_peak_892	125	7.52992	12.5716	10.2624	142
chr1	60253566	60254002	Project004-IPSHOCH-Exp5-ChIP-ES-2i-CTCF-IP-Blobel-Rep2-S1_S9_MACS2_rendition_1E-8_downsampled_try3_peak_893	1044	32.027	104.44	100.817	300
chr1	60262782	60262973	Project004-IPSHOCH-Exp5-ChIP-ES-2i-CTCF-IP-Blobel-Rep2-S1_S9_MACS2_rendition_1E-8_downsampled_try3_peak_894	253	12.6708	25.3317	22.7939	70
chr1	60289629	60289843	Project004-IPSHOCH-Exp5-ChIP-ES-2i-CTCF-IP-Blobel-Rep2-S1_S9_MACS2_rendition_1E-8_downsampled_try3_peak_895	254	12.411	25.4593	22.9156	97
chr1	60296159	60296438	Project004-IPSHOCH-Exp5-ChIP-ES-2i-CTCF-IP-Blobel-Rep2-S1_S9_MACS2_rendition_1E-8_downsampled_try3_peak_896	124	6.25	12.4453	10.1384	96
chr1	60303893	60304167	Project004-IPSHOCH-Exp5-ChIP-ES-2i-CTCF-IP-Blobel-Rep2-S1_S9_MACS2_rendition_1E-8_downsampled_try3_peak_897	255	12.48	25.5746	23.0301	104
chr1	60329436	60329630	Project004-IPSHOCH-Exp5-ChIP-ES-2i-CTCF-IP-Blobel-Rep2-S1_S9_MACS2_rendition_1E-8_downsampled_try3_peak_898	230	9.375	23.0745	20.5678	78
chr1	60397769	60398054	Project004-IPSHOCH-Exp5-ChIP-ES-2i-CTCF-IP-Blobel-Rep2-S1_S9_MACS2_rendition_1E-8_downsampled_try3_peak_899	394	15.2312	39.4324	36.6998	163
chr1	60439449	60439645	Project004-IPSHOCH-Exp5-ChIP-ES-2i-CTCF-IP-Blobel-Rep2-S1_S9_MACS2_rendition_1E-8_downsampled_try3_peak_900	239	12.1429	23.9023	21.3845	93
chr1	60461766	60462057	Project004-IPSHOCH-Exp5-ChIP-ES-2i-CTCF-IP-Blobel-Rep2-S1_S9_MACS2_rendition_1E-8_downsampled_try3_peak_901	450	18.9697	45.0902	42.2861	159
chr1	60468215	60468376	Project004-IPSHOCH-Exp5-ChIP-ES-2i-CTCF-IP-Blobel-Rep2-S1_S9_MACS2_rendition_1E-8_downsampled_try3_peak_902	144	8.21224	14.4892	12.1373	122
chr1	60480779	60481019	Project004-IPSHOCH-Exp5-ChIP-ES-2i-CTCF-IP-Blobel-Rep2-S1_S9_MACS2_rendition_1E-8_downsampled_try3_peak_903	373	16.4736	37.3156	34.6168	136
chr1	60485738	60486178	Project004-IPSHOCH-Exp5-ChIP-ES-2i-CTCF-IP-Blobel-Rep2-S1_S9_MACS2_rendition_1E-8_downsampled_try3_peak_904	1100	33.4821	110.089	106.379	234
chr1	60498129	60498602	Project004-IPSHOCH-Exp5-ChIP-ES-2i-CTCF-IP-Blobel-Rep2-S1_S9_MACS2_rendition_1E-8_downsampled_try3_peak_905	332	15.2303	33.2311	30.5827	261
chr1	60503956	60504259	Project004-IPSHOCH-Exp5-ChIP-ES-2i-CTCF-IP-Blobel-Rep2-S1_S9_MACS2_rendition_1E-8_downsampled_try3_peak_906	725	24.3243	72.5667	69.4011	174
chr1	60505569	60505824	Project004-IPSHOCH-Exp5-ChIP-ES-2i-CTCF-IP-Blobel-Rep2-S1_S9_MACS2_rendition_1E-8_downsampled_try3_peak_907	285	13.1714	28.5148	25.9296	105
chr1	60587005	60587218	Project004-IPSHOCH-Exp5-ChIP-ES-2i-CTCF-IP-Blobel-Rep2-S1_S9_MACS2_rendition_1E-8_downsampled_try3_peak_908	259	11.3258	25.9962	23.4471	107
chr1	60591762	60592108	Project004-IPSHOCH-Exp5-ChIP-ES-2i-CTCF-IP-Blobel-Rep2-S1_S9_MACS2_rendition_1E-8_downsampled_try3_peak_909	672	26.3975	67.294	64.1994	221
chr1	60615415	60615671	Project004-IPSHOCH-Exp5-ChIP-ES-2i-CTCF-IP-Blobel-Rep2-S1_S9_MACS2_rendition_1E-8_downsampled_try3_peak_910	327	15.3106	32.7313	30.0878	148
chr1	60622187	60622415	Project004-IPSHOCH-Exp5-ChIP-ES-2i-CTCF-IP-Blobel-Rep2-S1_S9_MACS2_rendition_1E-8_downsampled_try3_peak_911	236	10.0175	23.691	21.1802	106
chr1	60777115	60777312	Project004-IPSHOCH-Exp5-ChIP-ES-2i-CTCF-IP-Blobel-Rep2-S1_S9_MACS2_rendition_1E-8_downsampled_try3_peak_912	254	11.3514	25.4413	22.8977	111
chr1	60835691	60835994	Project004-IPSHOCH-Exp5-ChIP-ES-2i-CTCF-IP-Blobel-Rep2-S1_S9_MACS2_rendition_1E-8_downsampled_try3_peak_913	265	11.9781	26.5074	23.9555	113
chr1	60879766	60880259	Project004-IPSHOCH-Exp5-ChIP-ES-2i-CTCF-IP-Blobel-Rep2-S1_S9_MACS2_rendition_1E-8_downsampled_try3_peak_914	887	17.5926	88.7766	85.3874	225
chr1	60914226	60914522	Project004-IPSHOCH-Exp5-ChIP-ES-2i-CTCF-IP-Blobel-Rep2-S1_S9_MACS2_rendition_1E-8_downsampled_try3_peak_915	390	15.4054	39.0183	36.2879	144
chr1	60917538	60917868	Project004-IPSHOCH-Exp5-ChIP-ES-2i-CTCF-IP-Blobel-Rep2-S1_S9_MACS2_rendition_1E-8_downsampled_try3_peak_916	710	20.625	71.0769	67.9279	151
chr1	60925317	60925656	Project004-IPSHOCH-Exp5-ChIP-ES-2i-CTCF-IP-Blobel-Rep2-S1_S9_MACS2_rendition_1E-8_downsampled_try3_peak_917	1170	33.3084	117.068	113.255	146
chr1	61011750	61012096	Project004-IPSHOCH-Exp5-ChIP-ES-2i-CTCF-IP-Blobel-Rep2-S1_S9_MACS2_rendition_1E-8_downsampled_try3_peak_918	725	24.3243	72.5667	69.4011	173
chr1	61015175	61015500	Project004-IPSHOCH-Exp5-ChIP-ES-2i-CTCF-IP-Blobel-Rep2-S1_S9_MACS2_rendition_1E-8_downsampled_try3_peak_919	374	9.81481	37.402	34.6985	131
chr1	61017967	61018293	Project004-IPSHOCH-Exp5-ChIP-ES-2i-CTCF-IP-Blobel-Rep2-S1_S9_MACS2_rendition_1E-8_downsampled_try3_peak_920	496	15.9375	49.6638	46.7992	170
chr1	61019009	61019276	Project004-IPSHOCH-Exp5-ChIP-ES-2i-CTCF-IP-Blobel-Rep2-S1_S9_MACS2_rendition_1E-8_downsampled_try3_peak_921	589	22.0113	58.9675	55.9834	125
chr1	61112032	61112352	Project004-IPSHOCH-Exp5-ChIP-ES-2i-CTCF-IP-Blobel-Rep2-S1_S9_MACS2_rendition_1E-8_downsampled_try3_peak_922	1081	35.9395	108.17	104.49	140
chr1	61158554	61158830	Project004-IPSHOCH-Exp5-ChIP-ES-2i-CTCF-IP-Blobel-Rep2-S1_S9_MACS2_rendition_1E-8_downsampled_try3_peak_923	216	8.13559	21.6982	19.2146	131
chr1	61182098	61182266	Project004-IPSHOCH-Exp5-ChIP-ES-2i-CTCF-IP-Blobel-Rep2-S1_S9_MACS2_rendition_1E-8_downsampled_try3_peak_924	152	8.12799	15.2358	12.871	61
chr1	61196051	61196350	Project004-IPSHOCH-Exp5-ChIP-ES-2i-CTCF-IP-Blobel-Rep2-S1_S9_MACS2_rendition_1E-8_downsampled_try3_peak_925	852	31.677	85.2184	81.8757	152
chr1	61237965	61238357	Project004-IPSHOCH-Exp5-ChIP-ES-2i-CTCF-IP-Blobel-Rep2-S1_S9_MACS2_rendition_1E-8_downsampled_try3_peak_926	1220	36.0811	122.044	118.149	151
chr1	61354850	61355184	Project004-IPSHOCH-Exp5-ChIP-ES-2i-CTCF-IP-Blobel-Rep2-S1_S9_MACS2_rendition_1E-8_downsampled_try3_peak_927	583	20.6757	58.3323	55.3559	139
chr1	61433902	61434265	Project004-IPSHOCH-Exp5-ChIP-ES-2i-CTCF-IP-Blobel-Rep2-S1_S9_MACS2_rendition_1E-8_downsampled_try3_peak_928	695	20.3125	69.5996	66.4715	223
chr1	61571553	61571766	Project004-IPSHOCH-Exp5-ChIP-ES-2i-CTCF-IP-Blobel-Rep2-S1_S9_MACS2_rendition_1E-8_downsampled_try3_peak_929	413	15.0891	41.3507	38.596	88
chr1	61787625	61787824	Project004-IPSHOCH-Exp5-ChIP-ES-2i-CTCF-IP-Blobel-Rep2-S1_S9_MACS2_rendition_1E-8_downsampled_try3_peak_930	170	9.50311	17.0487	14.6428	92
chr1	61817864	61818172	Project004-IPSHOCH-Exp5-ChIP-ES-2i-CTCF-IP-Blobel-Rep2-S1_S9_MACS2_rendition_1E-8_downsampled_try3_peak_931	577	15.7627	57.7747	54.8073	155
chr1	61823591	61823788	Project004-IPSHOCH-Exp5-ChIP-ES-2i-CTCF-IP-Blobel-Rep2-S1_S9_MACS2_rendition_1E-8_downsampled_try3_peak_932	170	9.50311	17.0487	14.6428	115
chr1	61971596	61971814	Project004-IPSHOCH-Exp5-ChIP-ES-2i-CTCF-IP-Blobel-Rep2-S1_S9_MACS2_rendition_1E-8_downsampled_try3_peak_933	267	11.7568	26.7382	24.1801	131
chr1	62013720	62014100	Project004-IPSHOCH-Exp5-ChIP-ES-2i-CTCF-IP-Blobel-Rep2-S1_S9_MACS2_rendition_1E-8_downsampled_try3_peak_934	761	29.0373	76.1583	72.9404	196
chr1	62424958	62425286	Project004-IPSHOCH-Exp5-ChIP-ES-2i-CTCF-IP-Blobel-Rep2-S1_S9_MACS2_rendition_1E-8_downsampled_try3_peak_935	512	14.4915	51.2195	48.3347	148
chr1	62644654	62644819	Project004-IPSHOCH-Exp5-ChIP-ES-2i-CTCF-IP-Blobel-Rep2-S1_S9_MACS2_rendition_1E-8_downsampled_try3_peak_936	132	7.91925	13.209	10.8855	106
chr1	62743634	62743862	Project004-IPSHOCH-Exp5-ChIP-ES-2i-CTCF-IP-Blobel-Rep2-S1_S9_MACS2_rendition_1E-8_downsampled_try3_peak_937	465	17.1839	46.583	43.7602	122
chr1	62747622	62748054	Project004-IPSHOCH-Exp5-ChIP-ES-2i-CTCF-IP-Blobel-Rep2-S1_S9_MACS2_rendition_1E-8_downsampled_try3_peak_938	739	16.9286	73.9462	70.766	187
chr1	62754240	62754472	Project004-IPSHOCH-Exp5-ChIP-ES-2i-CTCF-IP-Blobel-Rep2-S1_S9_MACS2_rendition_1E-8_downsampled_try3_peak_939	204	10.4035	20.4761	18.0129	100
chr1	62764627	62764779	Project004-IPSHOCH-Exp5-ChIP-ES-2i-CTCF-IP-Blobel-Rep2-S1_S9_MACS2_rendition_1E-8_downsampled_try3_peak_940	132	7.91925	13.209	10.8855	77
chr1	62769111	62769508	Project004-IPSHOCH-Exp5-ChIP-ES-2i-CTCF-IP-Blobel-Rep2-S1_S9_MACS2_rendition_1E-8_downsampled_try3_peak_941	1224	30.6565	122.459	118.56	177
chr1	62784915	62785136	Project004-IPSHOCH-Exp5-ChIP-ES-2i-CTCF-IP-Blobel-Rep2-S1_S9_MACS2_rendition_1E-8_downsampled_try3_peak_942	349	14.2912	34.9876	32.3154	104
chr1	62821489	62821757	Project004-IPSHOCH-Exp5-ChIP-ES-2i-CTCF-IP-Blobel-Rep2-S1_S9_MACS2_rendition_1E-8_downsampled_try3_peak_943	267	11.7568	26.7382	24.1801	126
chr1	62829910	62830096	Project004-IPSHOCH-Exp5-ChIP-ES-2i-CTCF-IP-Blobel-Rep2-S1_S9_MACS2_rendition_1E-8_downsampled_try3_peak_944	361	14.9726	36.1573	33.471	82
chr1	62832787	62833241	Project004-IPSHOCH-Exp5-ChIP-ES-2i-CTCF-IP-Blobel-Rep2-S1_S9_MACS2_rendition_1E-8_downsampled_try3_peak_945	1389	46.4596	138.929	134.772	224
chr1	62842148	62842718	Project004-IPSHOCH-Exp5-ChIP-ES-2i-CTCF-IP-Blobel-Rep2-S1_S9_MACS2_rendition_1E-8_downsampled_try3_peak_946	423	12.7119	42.3632	39.5922	425
chr1	62866774	62867100	Project004-IPSHOCH-Exp5-ChIP-ES-2i-CTCF-IP-Blobel-Rep2-S1_S9_MACS2_rendition_1E-8_downsampled_try3_peak_947	1134	39.5963	113.423	109.663	174
chr1	62976099	62976546	Project004-IPSHOCH-Exp5-ChIP-ES-2i-CTCF-IP-Blobel-Rep2-S1_S9_MACS2_rendition_1E-8_downsampled_try3_peak_948	1310	38.1081	131.031	126.998	175
chr1	63010956	63011221	Project004-IPSHOCH-Exp5-ChIP-ES-2i-CTCF-IP-Blobel-Rep2-S1_S9_MACS2_rendition_1E-8_downsampled_try3_peak_949	460	12.2143	46.0084	43.1942	129
chr1	63013584	63013793	Project004-IPSHOCH-Exp5-ChIP-ES-2i-CTCF-IP-Blobel-Rep2-S1_S9_MACS2_rendition_1E-8_downsampled_try3_peak_950	605	22.4605	60.5781	57.572	78
chr1	63030979	63031409	Project004-IPSHOCH-Exp5-ChIP-ES-2i-CTCF-IP-Blobel-Rep2-S1_S9_MACS2_rendition_1E-8_downsampled_try3_peak_951	1040	31.2435	104.062	100.445	254
chr1	63032883	63033251	Project004-IPSHOCH-Exp5-ChIP-ES-2i-CTCF-IP-Blobel-Rep2-S1_S9_MACS2_rendition_1E-8_downsampled_try3_peak_952	1132	22.9286	113.289	109.531	152
chr1	63135275	63135578	Project004-IPSHOCH-Exp5-ChIP-ES-2i-CTCF-IP-Blobel-Rep2-S1_S9_MACS2_rendition_1E-8_downsampled_try3_peak_953	709	23.9189	70.9547	67.8104	155
chr1	63137227	63137746	Project004-IPSHOCH-Exp5-ChIP-ES-2i-CTCF-IP-Blobel-Rep2-S1_S9_MACS2_rendition_1E-8_downsampled_try3_peak_954	570	20.4159	57.0455	54.0844	194
chr1	63147568	63147755	Project004-IPSHOCH-Exp5-ChIP-ES-2i-CTCF-IP-Blobel-Rep2-S1_S9_MACS2_rendition_1E-8_downsampled_try3_peak_955	222	10.1541	22.2325	19.742	86
chr1	63157464	63157802	Project004-IPSHOCH-Exp5-ChIP-ES-2i-CTCF-IP-Blobel-Rep2-S1_S9_MACS2_rendition_1E-8_downsampled_try3_peak_956	1026	30.4482	102.633	99.0395	186
chr1	63161182	63161383	Project004-IPSHOCH-Exp5-ChIP-ES-2i-CTCF-IP-Blobel-Rep2-S1_S9_MACS2_rendition_1E-8_downsampled_try3_peak_957	313	11.5625	31.3987	28.7727	82
chr1	63162671	63162839	Project004-IPSHOCH-Exp5-ChIP-ES-2i-CTCF-IP-Blobel-Rep2-S1_S9_MACS2_rendition_1E-8_downsampled_try3_peak_958	112	6.48649	11.2573	8.98216	116
chr1	63192825	63193003	Project004-IPSHOCH-Exp5-ChIP-ES-2i-CTCF-IP-Blobel-Rep2-S1_S9_MACS2_rendition_1E-8_downsampled_try3_peak_959	249	12.0768	24.9017	22.3705	76
chr1	63227498	63228029	Project004-IPSHOCH-Exp5-ChIP-ES-2i-CTCF-IP-Blobel-Rep2-S1_S9_MACS2_rendition_1E-8_downsampled_try3_peak_960	1449	27.4286	144.939	140.689	298
chr1	63229212	63229564	Project004-IPSHOCH-Exp5-ChIP-ES-2i-CTCF-IP-Blobel-Rep2-S1_S9_MACS2_rendition_1E-8_downsampled_try3_peak_961	751	21.8098	75.1396	71.9421	162
chr1	63234478	63234644	Project004-IPSHOCH-Exp5-ChIP-ES-2i-CTCF-IP-Blobel-Rep2-S1_S9_MACS2_rendition_1E-8_downsampled_try3_peak_962	151	7.81087	15.165	12.802	93
chr1	63238682	63238840	Project004-IPSHOCH-Exp5-ChIP-ES-2i-CTCF-IP-Blobel-Rep2-S1_S9_MACS2_rendition_1E-8_downsampled_try3_peak_963	157	8.45035	15.7685	13.3862	105
chr1	63251057	63251228	Project004-IPSHOCH-Exp5-ChIP-ES-2i-CTCF-IP-Blobel-Rep2-S1_S9_MACS2_rendition_1E-8_downsampled_try3_peak_964	222	10.1541	22.2325	19.742	77
chr1	63259591	63259854	Project004-IPSHOCH-Exp5-ChIP-ES-2i-CTCF-IP-Blobel-Rep2-S1_S9_MACS2_rendition_1E-8_downsampled_try3_peak_965	248	8.8983	24.8937	22.3625	139
chr1	63265938	63266281	Project004-IPSHOCH-Exp5-ChIP-ES-2i-CTCF-IP-Blobel-Rep2-S1_S9_MACS2_rendition_1E-8_downsampled_try3_peak_966	978	23.9443	97.8095	94.2857	147
chr1	63288906	63289118	Project004-IPSHOCH-Exp5-ChIP-ES-2i-CTCF-IP-Blobel-Rep2-S1_S9_MACS2_rendition_1E-8_downsampled_try3_peak_967	323	12.4355	32.3773	29.7413	93
chr1	63450184	63450521	Project004-IPSHOCH-Exp5-ChIP-ES-2i-CTCF-IP-Blobel-Rep2-S1_S9_MACS2_rendition_1E-8_downsampled_try3_peak_968	941	29.5946	94.1364	90.6656	185
chr1	63656241	63656620	Project004-IPSHOCH-Exp5-ChIP-ES-2i-CTCF-IP-Blobel-Rep2-S1_S9_MACS2_rendition_1E-8_downsampled_try3_peak_969	482	15.625	48.2983	45.4524	151
chr1	63704562	63704982	Project004-IPSHOCH-Exp5-ChIP-ES-2i-CTCF-IP-Blobel-Rep2-S1_S9_MACS2_rendition_1E-8_downsampled_try3_peak_970	1256	36.8919	125.625	121.674	186
chr1	63706185	63706422	Project004-IPSHOCH-Exp5-ChIP-ES-2i-CTCF-IP-Blobel-Rep2-S1_S9_MACS2_rendition_1E-8_downsampled_try3_peak_971	430	14.0685	43.0474	40.2708	126
chr1	63715426	63715678	Project004-IPSHOCH-Exp5-ChIP-ES-2i-CTCF-IP-Blobel-Rep2-S1_S9_MACS2_rendition_1E-8_downsampled_try3_peak_972	598	21.0811	59.8822	56.8861	117
chr1	63901441	63901690	Project004-IPSHOCH-Exp5-ChIP-ES-2i-CTCF-IP-Blobel-Rep2-S1_S9_MACS2_rendition_1E-8_downsampled_try3_peak_973	620	24.8137	62.0773	59.0517	146
chr1	63928503	63928678	Project004-IPSHOCH-Exp5-ChIP-ES-2i-CTCF-IP-Blobel-Rep2-S1_S9_MACS2_rendition_1E-8_downsampled_try3_peak_974	164	7.5	16.4902	14.0994	95
chr1	64000078	64000360	Project004-IPSHOCH-Exp5-ChIP-ES-2i-CTCF-IP-Blobel-Rep2-S1_S9_MACS2_rendition_1E-8_downsampled_try3_peak_975	404	17.9503	40.4998	37.7504	140
chr1	64465203	64465571	Project004-IPSHOCH-Exp5-ChIP-ES-2i-CTCF-IP-Blobel-Rep2-S1_S9_MACS2_rendition_1E-8_downsampled_try3_peak_976	544	22.2071	54.4072	51.4828	150
chr1	64492629	64492940	Project004-IPSHOCH-Exp5-ChIP-ES-2i-CTCF-IP-Blobel-Rep2-S1_S9_MACS2_rendition_1E-8_downsampled_try3_peak_977	631	16.7797	63.1445	60.1038	188
chr1	64494736	64495031	Project004-IPSHOCH-Exp5-ChIP-ES-2i-CTCF-IP-Blobel-Rep2-S1_S9_MACS2_rendition_1E-8_downsampled_try3_peak_978	637	19.0625	63.7575	60.7106	143
chr1	64508150	64508560	Project004-IPSHOCH-Exp5-ChIP-ES-2i-CTCF-IP-Blobel-Rep2-S1_S9_MACS2_rendition_1E-8_downsampled_try3_peak_979	823	26.7568	82.3854	79.0812	241
chr1	64579311	64579463	Project004-IPSHOCH-Exp5-ChIP-ES-2i-CTCF-IP-Blobel-Rep2-S1_S9_MACS2_rendition_1E-8_downsampled_try3_peak_980	173	7.98297	17.3698	14.9624	62
chr1	64590456	64590608	Project004-IPSHOCH-Exp5-ChIP-ES-2i-CTCF-IP-Blobel-Rep2-S1_S9_MACS2_rendition_1E-8_downsampled_try3_peak_981	145	7.7027	14.5288	12.1727	83
chr1	64664059	64664558	Project004-IPSHOCH-Exp5-ChIP-ES-2i-CTCF-IP-Blobel-Rep2-S1_S9_MACS2_rendition_1E-8_downsampled_try3_peak_982	2018	45.8647	201.896	196.88	292
chr1	64683270	64683436	Project004-IPSHOCH-Exp5-ChIP-ES-2i-CTCF-IP-Blobel-Rep2-S1_S9_MACS2_rendition_1E-8_downsampled_try3_peak_983	134	6.5625	13.4274	11.0962	105
chr1	64702377	64702677	Project004-IPSHOCH-Exp5-ChIP-ES-2i-CTCF-IP-Blobel-Rep2-S1_S9_MACS2_rendition_1E-8_downsampled_try3_peak_984	196	7.62712	19.6337	17.1877	187
chr1	64703327	64703482	Project004-IPSHOCH-Exp5-ChIP-ES-2i-CTCF-IP-Blobel-Rep2-S1_S9_MACS2_rendition_1E-8_downsampled_try3_peak_985	162	8.20142	16.2955	13.9084	28
chr1	64751807	64752156	Project004-IPSHOCH-Exp5-ChIP-ES-2i-CTCF-IP-Blobel-Rep2-S1_S9_MACS2_rendition_1E-8_downsampled_try3_peak_986	840	30.9866	84.0346	80.7122	208
chr1	64756545	64756830	Project004-IPSHOCH-Exp5-ChIP-ES-2i-CTCF-IP-Blobel-Rep2-S1_S9_MACS2_rendition_1E-8_downsampled_try3_peak_987	803	25.0749	80.3204	77.0468	142
chr1	64764134	64764456	Project004-IPSHOCH-Exp5-ChIP-ES-2i-CTCF-IP-Blobel-Rep2-S1_S9_MACS2_rendition_1E-8_downsampled_try3_peak_988	857	27.5676	85.7116	82.3607	141
chr1	64782458	64782818	Project004-IPSHOCH-Exp5-ChIP-ES-2i-CTCF-IP-Blobel-Rep2-S1_S9_MACS2_rendition_1E-8_downsampled_try3_peak_989	230	7.22222	23.0754	20.5684	179
chr1	64784045	64784262	Project004-IPSHOCH-Exp5-ChIP-ES-2i-CTCF-IP-Blobel-Rep2-S1_S9_MACS2_rendition_1E-8_downsampled_try3_peak_990	295	11.2256	29.5013	26.9034	81
chr1	64965512	64965823	Project004-IPSHOCH-Exp5-ChIP-ES-2i-CTCF-IP-Blobel-Rep2-S1_S9_MACS2_rendition_1E-8_downsampled_try3_peak_991	549	17.0314	54.9046	51.9767	176
chr1	65032853	65033097	Project004-IPSHOCH-Exp5-ChIP-ES-2i-CTCF-IP-Blobel-Rep2-S1_S9_MACS2_rendition_1E-8_downsampled_try3_peak_992	618	24.6994	61.8819	58.8604	130
chr1	65053802	65053982	Project004-IPSHOCH-Exp5-ChIP-ES-2i-CTCF-IP-Blobel-Rep2-S1_S9_MACS2_rendition_1E-8_downsampled_try3_peak_993	152	8.12799	15.2358	12.871	95
chr1	65056742	65057242	Project004-IPSHOCH-Exp5-ChIP-ES-2i-CTCF-IP-Blobel-Rep2-S1_S9_MACS2_rendition_1E-8_downsampled_try3_peak_994	1375	29.4915	137.58	133.445	198
chr1	65092958	65093301	Project004-IPSHOCH-Exp5-ChIP-ES-2i-CTCF-IP-Blobel-Rep2-S1_S9_MACS2_rendition_1E-8_downsampled_try3_peak_995	709	23.9189	70.9547	67.8104	200
chr1	65122258	65122542	Project004-IPSHOCH-Exp5-ChIP-ES-2i-CTCF-IP-Blobel-Rep2-S1_S9_MACS2_rendition_1E-8_downsampled_try3_peak_996	253	10	25.3882	22.8479	80
chr1	65158577	65158986	Project004-IPSHOCH-Exp5-ChIP-ES-2i-CTCF-IP-Blobel-Rep2-S1_S9_MACS2_rendition_1E-8_downsampled_try3_peak_997	1502	47.9233	150.294	145.963	186
chr1	65224825	65225212	Project004-IPSHOCH-Exp5-ChIP-ES-2i-CTCF-IP-Blobel-Rep2-S1_S9_MACS2_rendition_1E-8_downsampled_try3_peak_998	1174	38.3039	117.423	113.601	162
chr1	65225760	65226115	Project004-IPSHOCH-Exp5-ChIP-ES-2i-CTCF-IP-Blobel-Rep2-S1_S9_MACS2_rendition_1E-8_downsampled_try3_peak_999	1114	33.6487	111.42	107.693	145
chr1	65226279	65226937	Project004-IPSHOCH-Exp5-ChIP-ES-2i-CTCF-IP-Blobel-Rep2-S1_S9_MACS2_rendition_1E-8_downsampled_try3_peak_1000	1027	31.6216	102.709	99.1105	351
chr1	65232189	65232374	Project004-IPSHOCH-Exp5-ChIP-ES-2i-CTCF-IP-Blobel-Rep2-S1_S9_MACS2_rendition_1E-8_downsampled_try3_peak_1001	193	6.48148	19.3479	16.9047	106
chr1	65329362	65329685	Project004-IPSHOCH-Exp5-ChIP-ES-2i-CTCF-IP-Blobel-Rep2-S1_S9_MACS2_rendition_1E-8_downsampled_try3_peak_1002	623	18.75	62.3143	59.2839	183
chr1	65356727	65357026	Project004-IPSHOCH-Exp5-ChIP-ES-2i-CTCF-IP-Blobel-Rep2-S1_S9_MACS2_rendition_1E-8_downsampled_try3_peak_1003	586	23.7578	58.6448	55.6626	132
chr1	65358766	65359004	Project004-IPSHOCH-Exp5-ChIP-ES-2i-CTCF-IP-Blobel-Rep2-S1_S9_MACS2_rendition_1E-8_downsampled_try3_peak_1004	466	19.4688	46.6801	43.8563	129
chr1	65434898	65435308	Project004-IPSHOCH-Exp5-ChIP-ES-2i-CTCF-IP-Blobel-Rep2-S1_S9_MACS2_rendition_1E-8_downsampled_try3_peak_1005	1131	29.0625	113.163	109.411	160
chr1	65609866	65610021	Project004-IPSHOCH-Exp5-ChIP-ES-2i-CTCF-IP-Blobel-Rep2-S1_S9_MACS2_rendition_1E-8_downsampled_try3_peak_1006	183	10.0311	18.3771	15.9485	62
chr1	65701098	65701355	Project004-IPSHOCH-Exp5-ChIP-ES-2i-CTCF-IP-Blobel-Rep2-S1_S9_MACS2_rendition_1E-8_downsampled_try3_peak_1007	148	4.95146	14.8135	12.4534	148
chr1	66033255	66033469	Project004-IPSHOCH-Exp5-ChIP-ES-2i-CTCF-IP-Blobel-Rep2-S1_S9_MACS2_rendition_1E-8_downsampled_try3_peak_1008	267	13.1988	26.7789	24.2164	113
chr1	66146496	66146665	Project004-IPSHOCH-Exp5-ChIP-ES-2i-CTCF-IP-Blobel-Rep2-S1_S9_MACS2_rendition_1E-8_downsampled_try3_peak_1009	168	8.51351	16.8225	14.4247	116
chr1	66151175	66151401	Project004-IPSHOCH-Exp5-ChIP-ES-2i-CTCF-IP-Blobel-Rep2-S1_S9_MACS2_rendition_1E-8_downsampled_try3_peak_1010	320	13.3784	32.0676	29.4335	138
chr1	66702407	66702660	Project004-IPSHOCH-Exp5-ChIP-ES-2i-CTCF-IP-Blobel-Rep2-S1_S9_MACS2_rendition_1E-8_downsampled_try3_peak_1011	312	14.7826	31.2198	28.5969	91
chr1	66725333	66725583	Project004-IPSHOCH-Exp5-ChIP-ES-2i-CTCF-IP-Blobel-Rep2-S1_S9_MACS2_rendition_1E-8_downsampled_try3_peak_1012	453	19.5342	45.3151	42.5059	143
chr1	66779880	66780037	Project004-IPSHOCH-Exp5-ChIP-ES-2i-CTCF-IP-Blobel-Rep2-S1_S9_MACS2_rendition_1E-8_downsampled_try3_peak_1013	170	9.50311	17.0487	14.6428	65
chr1	66885110	66885416	Project004-IPSHOCH-Exp5-ChIP-ES-2i-CTCF-IP-Blobel-Rep2-S1_S9_MACS2_rendition_1E-8_downsampled_try3_peak_1014	856	29.1986	85.6857	82.3387	143
chr1	66894125	66894381	Project004-IPSHOCH-Exp5-ChIP-ES-2i-CTCF-IP-Blobel-Rep2-S1_S9_MACS2_rendition_1E-8_downsampled_try3_peak_1015	304	10.1695	30.4589	27.8476	136
chr1	66942329	66942664	Project004-IPSHOCH-Exp5-ChIP-ES-2i-CTCF-IP-Blobel-Rep2-S1_S9_MACS2_rendition_1E-8_downsampled_try3_peak_1016	585	20.3083	58.5212	55.5434	120
chr1	66942741	66942936	Project004-IPSHOCH-Exp5-ChIP-ES-2i-CTCF-IP-Blobel-Rep2-S1_S9_MACS2_rendition_1E-8_downsampled_try3_peak_1017	224	11.6149	22.4912	19.9952	108
chr1	66987491	66987865	Project004-IPSHOCH-Exp5-ChIP-ES-2i-CTCF-IP-Blobel-Rep2-S1_S9_MACS2_rendition_1E-8_downsampled_try3_peak_1018	857	27.5676	85.7116	82.3607	223
chr1	67039384	67039605	Project004-IPSHOCH-Exp5-ChIP-ES-2i-CTCF-IP-Blobel-Rep2-S1_S9_MACS2_rendition_1E-8_downsampled_try3_peak_1019	435	18.4704	43.5115	40.7285	93
chr1	67060839	67061120	Project004-IPSHOCH-Exp5-ChIP-ES-2i-CTCF-IP-Blobel-Rep2-S1_S9_MACS2_rendition_1E-8_downsampled_try3_peak_1020	389	17.4224	38.9194	36.1955	131
chr1	67108015	67108447	Project004-IPSHOCH-Exp5-ChIP-ES-2i-CTCF-IP-Blobel-Rep2-S1_S9_MACS2_rendition_1E-8_downsampled_try3_peak_1021	1192	41.1801	119.229	115.379	197
chr1	67190482	67190869	Project004-IPSHOCH-Exp5-ChIP-ES-2i-CTCF-IP-Blobel-Rep2-S1_S9_MACS2_rendition_1E-8_downsampled_try3_peak_1022	620	24.8137	62.0773	59.0517	226
chr1	67227732	67228107	Project004-IPSHOCH-Exp5-ChIP-ES-2i-CTCF-IP-Blobel-Rep2-S1_S9_MACS2_rendition_1E-8_downsampled_try3_peak_1023	900	27.3204	90.0703	86.6603	200
chr1	67264935	67265168	Project004-IPSHOCH-Exp5-ChIP-ES-2i-CTCF-IP-Blobel-Rep2-S1_S9_MACS2_rendition_1E-8_downsampled_try3_peak_1024	327	15.3106	32.7313	30.0878	112
chr1	67524638	67524843	Project004-IPSHOCH-Exp5-ChIP-ES-2i-CTCF-IP-Blobel-Rep2-S1_S9_MACS2_rendition_1E-8_downsampled_try3_peak_1025	312	14.7826	31.2198	28.5969	105
chr1	67568196	67568491	Project004-IPSHOCH-Exp5-ChIP-ES-2i-CTCF-IP-Blobel-Rep2-S1_S9_MACS2_rendition_1E-8_downsampled_try3_peak_1026	301	11.25	30.1722	27.5636	151
chr1	67686995	67687258	Project004-IPSHOCH-Exp5-ChIP-ES-2i-CTCF-IP-Blobel-Rep2-S1_S9_MACS2_rendition_1E-8_downsampled_try3_peak_1027	502	21.118	50.2346	47.3624	126
chr1	68087456	68087608	Project004-IPSHOCH-Exp5-ChIP-ES-2i-CTCF-IP-Blobel-Rep2-S1_S9_MACS2_rendition_1E-8_downsampled_try3_peak_1028	183	10.0311	18.3771	15.9485	61
chr1	68153085	68153405	Project004-IPSHOCH-Exp5-ChIP-ES-2i-CTCF-IP-Blobel-Rep2-S1_S9_MACS2_rendition_1E-8_downsampled_try3_peak_1029	567	20.2703	56.7908	53.8352	179
chr1	68197247	68197399	Project004-IPSHOCH-Exp5-ChIP-ES-2i-CTCF-IP-Blobel-Rep2-S1_S9_MACS2_rendition_1E-8_downsampled_try3_peak_1030	183	10.0311	18.3771	15.9485	85
chr1	68799421	68799623	Project004-IPSHOCH-Exp5-ChIP-ES-2i-CTCF-IP-Blobel-Rep2-S1_S9_MACS2_rendition_1E-8_downsampled_try3_peak_1031	267	11.7568	26.7382	24.1801	109
chr1	69111783	69111956	Project004-IPSHOCH-Exp5-ChIP-ES-2i-CTCF-IP-Blobel-Rep2-S1_S9_MACS2_rendition_1E-8_downsampled_try3_peak_1032	186	8.125	18.6213	16.1884	57
chr1	69185477	69185830	Project004-IPSHOCH-Exp5-ChIP-ES-2i-CTCF-IP-Blobel-Rep2-S1_S9_MACS2_rendition_1E-8_downsampled_try3_peak_1033	725	27.9814	72.5881	69.4185	180
chr1	69211839	69212036	Project004-IPSHOCH-Exp5-ChIP-ES-2i-CTCF-IP-Blobel-Rep2-S1_S9_MACS2_rendition_1E-8_downsampled_try3_peak_1034	282	13.7267	28.2431	25.6591	123
chr1	69286080	69286261	Project004-IPSHOCH-Exp5-ChIP-ES-2i-CTCF-IP-Blobel-Rep2-S1_S9_MACS2_rendition_1E-8_downsampled_try3_peak_1035	183	10.0311	18.3771	15.9485	102
chr1	69288325	69288667	Project004-IPSHOCH-Exp5-ChIP-ES-2i-CTCF-IP-Blobel-Rep2-S1_S9_MACS2_rendition_1E-8_downsampled_try3_peak_1036	833	31.1491	83.3915	80.0737	156
chr1	69416787	69416947	Project004-IPSHOCH-Exp5-ChIP-ES-2i-CTCF-IP-Blobel-Rep2-S1_S9_MACS2_rendition_1E-8_downsampled_try3_peak_1037	170	9.50311	17.0487	14.6428	70
chr1	69423507	69423809	Project004-IPSHOCH-Exp5-ChIP-ES-2i-CTCF-IP-Blobel-Rep2-S1_S9_MACS2_rendition_1E-8_downsampled_try3_peak_1038	554	19.5272	55.4837	52.5432	148
chr1	69535291	69535468	Project004-IPSHOCH-Exp5-ChIP-ES-2i-CTCF-IP-Blobel-Rep2-S1_S9_MACS2_rendition_1E-8_downsampled_try3_peak_1039	224	11.6149	22.4912	19.9952	88
chr1	69735641	69735961	Project004-IPSHOCH-Exp5-ChIP-ES-2i-CTCF-IP-Blobel-Rep2-S1_S9_MACS2_rendition_1E-8_downsampled_try3_peak_1040	460	12.2143	46.0084	43.1942	127
chr1	69822268	69822508	Project004-IPSHOCH-Exp5-ChIP-ES-2i-CTCF-IP-Blobel-Rep2-S1_S9_MACS2_rendition_1E-8_downsampled_try3_peak_1041	342	15.8385	34.2574	31.5934	113
chr1	69831733	69832034	Project004-IPSHOCH-Exp5-ChIP-ES-2i-CTCF-IP-Blobel-Rep2-S1_S9_MACS2_rendition_1E-8_downsampled_try3_peak_1042	815	30.6211	81.572	78.2815	167
chr1	69836880	69837140	Project004-IPSHOCH-Exp5-ChIP-ES-2i-CTCF-IP-Blobel-Rep2-S1_S9_MACS2_rendition_1E-8_downsampled_try3_peak_1043	580	17.8125	58.0283	55.0577	119
chr1	70174655	70174947	Project004-IPSHOCH-Exp5-ChIP-ES-2i-CTCF-IP-Blobel-Rep2-S1_S9_MACS2_rendition_1E-8_downsampled_try3_peak_1044	552	22.7019	55.2506	52.3145	119
chr1	70316767	70317055	Project004-IPSHOCH-Exp5-ChIP-ES-2i-CTCF-IP-Blobel-Rep2-S1_S9_MACS2_rendition_1E-8_downsampled_try3_peak_1045	645	22.2973	64.5809	61.5219	122
chr1	70833696	70834100	Project004-IPSHOCH-Exp5-ChIP-ES-2i-CTCF-IP-Blobel-Rep2-S1_S9_MACS2_rendition_1E-8_downsampled_try3_peak_1046	580	17.8125	58.0283	55.0577	199
chr1	71083543	71083880	Project004-IPSHOCH-Exp5-ChIP-ES-2i-CTCF-IP-Blobel-Rep2-S1_S9_MACS2_rendition_1E-8_downsampled_try3_peak_1047	883	29.0897	88.3767	84.9914	172
chr1	71093508	71093753	Project004-IPSHOCH-Exp5-ChIP-ES-2i-CTCF-IP-Blobel-Rep2-S1_S9_MACS2_rendition_1E-8_downsampled_try3_peak_1048	141	8.2631	14.16	11.8196	175
chr1	71117343	71117559	Project004-IPSHOCH-Exp5-ChIP-ES-2i-CTCF-IP-Blobel-Rep2-S1_S9_MACS2_rendition_1E-8_downsampled_try3_peak_1049	191	9.32432	19.1965	16.7542	107
chr1	71235237	71235543	Project004-IPSHOCH-Exp5-ChIP-ES-2i-CTCF-IP-Blobel-Rep2-S1_S9_MACS2_rendition_1E-8_downsampled_try3_peak_1050	373	16.8944	37.3519	34.6487	198
chr1	71336066	71336522	Project004-IPSHOCH-Exp5-ChIP-ES-2i-CTCF-IP-Blobel-Rep2-S1_S9_MACS2_rendition_1E-8_downsampled_try3_peak_1051	1114	39.0683	111.499	107.77	195
chr1	71517521	71517805	Project004-IPSHOCH-Exp5-ChIP-ES-2i-CTCF-IP-Blobel-Rep2-S1_S9_MACS2_rendition_1E-8_downsampled_try3_peak_1052	433	16.6216	43.3264	40.5461	139
chr1	71552476	71552974	Project004-IPSHOCH-Exp5-ChIP-ES-2i-CTCF-IP-Blobel-Rep2-S1_S9_MACS2_rendition_1E-8_downsampled_try3_peak_1053	1032	33.6907	103.28	99.6766	165
chr1	71578334	71578625	Project004-IPSHOCH-Exp5-ChIP-ES-2i-CTCF-IP-Blobel-Rep2-S1_S9_MACS2_rendition_1E-8_downsampled_try3_peak_1054	755	21.5625	75.5477	72.342	142
chr1	71624794	71625008	Project004-IPSHOCH-Exp5-ChIP-ES-2i-CTCF-IP-Blobel-Rep2-S1_S9_MACS2_rendition_1E-8_downsampled_try3_peak_1055	282	13.7267	28.2431	25.6591	92
chr1	71656128	71656292	Project004-IPSHOCH-Exp5-ChIP-ES-2i-CTCF-IP-Blobel-Rep2-S1_S9_MACS2_rendition_1E-8_downsampled_try3_peak_1056	186	8.125	18.6213	16.1884	79
chr1	71722050	71722329	Project004-IPSHOCH-Exp5-ChIP-ES-2i-CTCF-IP-Blobel-Rep2-S1_S9_MACS2_rendition_1E-8_downsampled_try3_peak_1057	524	16.5625	52.4199	49.5206	133
chr1	71824959	71825220	Project004-IPSHOCH-Exp5-ChIP-ES-2i-CTCF-IP-Blobel-Rep2-S1_S9_MACS2_rendition_1E-8_downsampled_try3_peak_1058	448	13.2203	44.8531	42.052	129
chr1	72030557	72030758	Project004-IPSHOCH-Exp5-ChIP-ES-2i-CTCF-IP-Blobel-Rep2-S1_S9_MACS2_rendition_1E-8_downsampled_try3_peak_1059	253	12.6708	25.3317	22.7939	93
chr1	72170290	72170557	Project004-IPSHOCH-Exp5-ChIP-ES-2i-CTCF-IP-Blobel-Rep2-S1_S9_MACS2_rendition_1E-8_downsampled_try3_peak_1060	429	14.375	42.9238	40.148	122
chr1	72188169	72188808	Project004-IPSHOCH-Exp5-ChIP-ES-2i-CTCF-IP-Blobel-Rep2-S1_S9_MACS2_rendition_1E-8_downsampled_try3_peak_1061	1680	46.2162	168.075	163.487	450
chr1	72212705	72213199	Project004-IPSHOCH-Exp5-ChIP-ES-2i-CTCF-IP-Blobel-Rep2-S1_S9_MACS2_rendition_1E-8_downsampled_try3_peak_1062	1187	33.6826	118.799	114.957	236
chr1	72213664	72213995	Project004-IPSHOCH-Exp5-ChIP-ES-2i-CTCF-IP-Blobel-Rep2-S1_S9_MACS2_rendition_1E-8_downsampled_try3_peak_1063	774	25.5405	77.4452	74.2101	164
chr1	72258790	72259307	Project004-IPSHOCH-Exp5-ChIP-ES-2i-CTCF-IP-Blobel-Rep2-S1_S9_MACS2_rendition_1E-8_downsampled_try3_peak_1064	429	14.375	42.9238	40.148	137
chr1	72266595	72266891	Project004-IPSHOCH-Exp5-ChIP-ES-2i-CTCF-IP-Blobel-Rep2-S1_S9_MACS2_rendition_1E-8_downsampled_try3_peak_1065	608	18.4375	60.8783	57.8679	184
chr1	72271509	72271690	Project004-IPSHOCH-Exp5-ChIP-ES-2i-CTCF-IP-Blobel-Rep2-S1_S9_MACS2_rendition_1E-8_downsampled_try3_peak_1066	231	10.0594	23.1958	20.6877	99
chr1	72279242	72279606	Project004-IPSHOCH-Exp5-ChIP-ES-2i-CTCF-IP-Blobel-Rep2-S1_S9_MACS2_rendition_1E-8_downsampled_try3_peak_1067	481	17.2156	48.1821	45.3397	109
chr1	72299019	72299244	Project004-IPSHOCH-Exp5-ChIP-ES-2i-CTCF-IP-Blobel-Rep2-S1_S9_MACS2_rendition_1E-8_downsampled_try3_peak_1068	272	12.0608	27.2578	24.6904	122
chr1	72308022	72308234	Project004-IPSHOCH-Exp5-ChIP-ES-2i-CTCF-IP-Blobel-Rep2-S1_S9_MACS2_rendition_1E-8_downsampled_try3_peak_1069	253	10	25.3882	22.8479	74
chr1	72353169	72353781	Project004-IPSHOCH-Exp5-ChIP-ES-2i-CTCF-IP-Blobel-Rep2-S1_S9_MACS2_rendition_1E-8_downsampled_try3_peak_1070	570	19.041	57.0739	54.1116	462
chr1	72360083	72360569	Project004-IPSHOCH-Exp5-ChIP-ES-2i-CTCF-IP-Blobel-Rep2-S1_S9_MACS2_rendition_1E-8_downsampled_try3_peak_1071	996	25.7423	99.6237	96.0736	331
chr1	72427157	72427378	Project004-IPSHOCH-Exp5-ChIP-ES-2i-CTCF-IP-Blobel-Rep2-S1_S9_MACS2_rendition_1E-8_downsampled_try3_peak_1072	351	12.5	35.1463	32.4703	112
chr1	72483639	72483796	Project004-IPSHOCH-Exp5-ChIP-ES-2i-CTCF-IP-Blobel-Rep2-S1_S9_MACS2_rendition_1E-8_downsampled_try3_peak_1073	156	8.10811	15.6651	13.2917	71
chr1	72611296	72611482	Project004-IPSHOCH-Exp5-ChIP-ES-2i-CTCF-IP-Blobel-Rep2-S1_S9_MACS2_rendition_1E-8_downsampled_try3_peak_1074	144	6.875	14.4294	12.0842	110
chr1	72621793	72622125	Project004-IPSHOCH-Exp5-ChIP-ES-2i-CTCF-IP-Blobel-Rep2-S1_S9_MACS2_rendition_1E-8_downsampled_try3_peak_1075	366	10.5	36.6942	33.9981	128
chr1	72657086	72657340	Project004-IPSHOCH-Exp5-ChIP-ES-2i-CTCF-IP-Blobel-Rep2-S1_S9_MACS2_rendition_1E-8_downsampled_try3_peak_1076	362	14.5946	36.202	33.5124	132
chr1	72748365	72748742	Project004-IPSHOCH-Exp5-ChIP-ES-2i-CTCF-IP-Blobel-Rep2-S1_S9_MACS2_rendition_1E-8_downsampled_try3_peak_1077	708	27.4534	70.815	67.6748	226
chr1	72763550	72763892	Project004-IPSHOCH-Exp5-ChIP-ES-2i-CTCF-IP-Blobel-Rep2-S1_S9_MACS2_rendition_1E-8_downsampled_try3_peak_1078	1114	33.6487	111.42	107.693	175
chr1	72765347	72765744	Project004-IPSHOCH-Exp5-ChIP-ES-2i-CTCF-IP-Blobel-Rep2-S1_S9_MACS2_rendition_1E-8_downsampled_try3_peak_1079	841	20.5932	84.165	80.8359	249
chr1	72812085	72812331	Project004-IPSHOCH-Exp5-ChIP-ES-2i-CTCF-IP-Blobel-Rep2-S1_S9_MACS2_rendition_1E-8_downsampled_try3_peak_1080	433	16.6216	43.3264	40.5461	139
chr1	72901433	72901927	Project004-IPSHOCH-Exp5-ChIP-ES-2i-CTCF-IP-Blobel-Rep2-S1_S9_MACS2_rendition_1E-8_downsampled_try3_peak_1081	1450	46.1544	145.013	140.761	255
chr1	72912396	72912730	Project004-IPSHOCH-Exp5-ChIP-ES-2i-CTCF-IP-Blobel-Rep2-S1_S9_MACS2_rendition_1E-8_downsampled_try3_peak_1082	1346	38.9189	134.659	130.569	175
chr1	72924461	72924727	Project004-IPSHOCH-Exp5-ChIP-ES-2i-CTCF-IP-Blobel-Rep2-S1_S9_MACS2_rendition_1E-8_downsampled_try3_peak_1083	554	19.5272	55.4837	52.5432	109
chr1	72925887	72926207	Project004-IPSHOCH-Exp5-ChIP-ES-2i-CTCF-IP-Blobel-Rep2-S1_S9_MACS2_rendition_1E-8_downsampled_try3_peak_1084	941	29.5946	94.1364	90.6656	157
chr1	73070305	73070460	Project004-IPSHOCH-Exp5-ChIP-ES-2i-CTCF-IP-Blobel-Rep2-S1_S9_MACS2_rendition_1E-8_downsampled_try3_peak_1085	183	9.4334	18.3567	15.9336	47
chr1	73321195	73321366	Project004-IPSHOCH-Exp5-ChIP-ES-2i-CTCF-IP-Blobel-Rep2-S1_S9_MACS2_rendition_1E-8_downsampled_try3_peak_1086	179	8.91892	17.9999	15.579	92
chr1	73665195	73665436	Project004-IPSHOCH-Exp5-ChIP-ES-2i-CTCF-IP-Blobel-Rep2-S1_S9_MACS2_rendition_1E-8_downsampled_try3_peak_1087	282	13.7267	28.2431	25.6591	140
chr1	73783811	73783996	Project004-IPSHOCH-Exp5-ChIP-ES-2i-CTCF-IP-Blobel-Rep2-S1_S9_MACS2_rendition_1E-8_downsampled_try3_peak_1088	253	12.6708	25.3317	22.7939	63
chr1	73872906	73873245	Project004-IPSHOCH-Exp5-ChIP-ES-2i-CTCF-IP-Blobel-Rep2-S1_S9_MACS2_rendition_1E-8_downsampled_try3_peak_1089	873	15	87.3741	84.004	178
chr1	73907603	73907783	Project004-IPSHOCH-Exp5-ChIP-ES-2i-CTCF-IP-Blobel-Rep2-S1_S9_MACS2_rendition_1E-8_downsampled_try3_peak_1090	147	8.39302	14.7852	12.4251	80
chr1	73909389	73909927	Project004-IPSHOCH-Exp5-ChIP-ES-2i-CTCF-IP-Blobel-Rep2-S1_S9_MACS2_rendition_1E-8_downsampled_try3_peak_1091	583	14.3571	58.3241	55.3511	192
chr1	73948078	73948509	Project004-IPSHOCH-Exp5-ChIP-ES-2i-CTCF-IP-Blobel-Rep2-S1_S9_MACS2_rendition_1E-8_downsampled_try3_peak_1092	1044	32.027	104.44	100.817	210
chr1	73948953	73949303	Project004-IPSHOCH-Exp5-ChIP-ES-2i-CTCF-IP-Blobel-Rep2-S1_S9_MACS2_rendition_1E-8_downsampled_try3_peak_1093	693	23.5135	69.35	66.2263	140
chr1	73972933	73973158	Project004-IPSHOCH-Exp5-ChIP-ES-2i-CTCF-IP-Blobel-Rep2-S1_S9_MACS2_rendition_1E-8_downsampled_try3_peak_1094	293	14.0247	29.3362	26.7423	88
chr1	74033238	74033575	Project004-IPSHOCH-Exp5-ChIP-ES-2i-CTCF-IP-Blobel-Rep2-S1_S9_MACS2_rendition_1E-8_downsampled_try3_peak_1095	586	23.7578	58.6448	55.6626	202
chr1	74042879	74043300	Project004-IPSHOCH-Exp5-ChIP-ES-2i-CTCF-IP-Blobel-Rep2-S1_S9_MACS2_rendition_1E-8_downsampled_try3_peak_1096	955	25.625	95.5421	92.0523	151
chr1	74071462	74071668	Project004-IPSHOCH-Exp5-ChIP-ES-2i-CTCF-IP-Blobel-Rep2-S1_S9_MACS2_rendition_1E-8_downsampled_try3_peak_1097	138	8.07711	13.8549	11.5176	133
chr1	74103313	74103476	Project004-IPSHOCH-Exp5-ChIP-ES-2i-CTCF-IP-Blobel-Rep2-S1_S9_MACS2_rendition_1E-8_downsampled_try3_peak_1098	183	10.0311	18.3771	15.9485	60
chr1	74123988	74124247	Project004-IPSHOCH-Exp5-ChIP-ES-2i-CTCF-IP-Blobel-Rep2-S1_S9_MACS2_rendition_1E-8_downsampled_try3_peak_1099	930	32.9473	93.0734	89.6172	130
chr1	74129449	74129819	Project004-IPSHOCH-Exp5-ChIP-ES-2i-CTCF-IP-Blobel-Rep2-S1_S9_MACS2_rendition_1E-8_downsampled_try3_peak_1100	1391	29.7458	139.18	135.02	174
chr1	74144932	74145176	Project004-IPSHOCH-Exp5-ChIP-ES-2i-CTCF-IP-Blobel-Rep2-S1_S9_MACS2_rendition_1E-8_downsampled_try3_peak_1101	591	17.9604	59.1285	56.1423	119
chr1	74171631	74172092	Project004-IPSHOCH-Exp5-ChIP-ES-2i-CTCF-IP-Blobel-Rep2-S1_S9_MACS2_rendition_1E-8_downsampled_try3_peak_1102	955	25.625	95.5421	92.0523	260
chr1	74178632	74178843	Project004-IPSHOCH-Exp5-ChIP-ES-2i-CTCF-IP-Blobel-Rep2-S1_S9_MACS2_rendition_1E-8_downsampled_try3_peak_1103	331	14.3747	33.1031	30.4553	99
chr1	74186052	74186380	Project004-IPSHOCH-Exp5-ChIP-ES-2i-CTCF-IP-Blobel-Rep2-S1_S9_MACS2_rendition_1E-8_downsampled_try3_peak_1104	790	25.9459	79.0852	75.8275	170
chr1	74229611	74229848	Project004-IPSHOCH-Exp5-ChIP-ES-2i-CTCF-IP-Blobel-Rep2-S1_S9_MACS2_rendition_1E-8_downsampled_try3_peak_1105	329	14.6595	32.9222	30.2753	108
chr1	74233074	74233322	Project004-IPSHOCH-Exp5-ChIP-ES-2i-CTCF-IP-Blobel-Rep2-S1_S9_MACS2_rendition_1E-8_downsampled_try3_peak_1106	433	16.6216	43.3264	40.5461	102
chr1	74242585	74242905	Project004-IPSHOCH-Exp5-ChIP-ES-2i-CTCF-IP-Blobel-Rep2-S1_S9_MACS2_rendition_1E-8_downsampled_try3_peak_1107	784	19.5763	78.4324	75.1863	170
chr1	74250159	74250359	Project004-IPSHOCH-Exp5-ChIP-ES-2i-CTCF-IP-Blobel-Rep2-S1_S9_MACS2_rendition_1E-8_downsampled_try3_peak_1108	193	6.48148	19.3479	16.9047	81
chr1	74252348	74252785	Project004-IPSHOCH-Exp5-ChIP-ES-2i-CTCF-IP-Blobel-Rep2-S1_S9_MACS2_rendition_1E-8_downsampled_try3_peak_1109	856	20.8475	85.6117	82.2655	231
chr1	74267910	74268086	Project004-IPSHOCH-Exp5-ChIP-ES-2i-CTCF-IP-Blobel-Rep2-S1_S9_MACS2_rendition_1E-8_downsampled_try3_peak_1110	157	8.97516	15.7436	13.3619	61
chr1	74315432	74315690	Project004-IPSHOCH-Exp5-ChIP-ES-2i-CTCF-IP-Blobel-Rep2-S1_S9_MACS2_rendition_1E-8_downsampled_try3_peak_1111	667	23.5284	66.7262	63.6383	122
chr1	74325941	74326144	Project004-IPSHOCH-Exp5-ChIP-ES-2i-CTCF-IP-Blobel-Rep2-S1_S9_MACS2_rendition_1E-8_downsampled_try3_peak_1112	174	8.59196	17.4461	15.0373	84
chr1	74333732	74334142	Project004-IPSHOCH-Exp5-ChIP-ES-2i-CTCF-IP-Blobel-Rep2-S1_S9_MACS2_rendition_1E-8_downsampled_try3_peak_1113	1762	40.625	176.244	171.545	200
chr1	74359910	74360238	Project004-IPSHOCH-Exp5-ChIP-ES-2i-CTCF-IP-Blobel-Rep2-S1_S9_MACS2_rendition_1E-8_downsampled_try3_peak_1114	878	28.8149	87.8981	84.5156	158
chr1	74373510	74373873	Project004-IPSHOCH-Exp5-ChIP-ES-2i-CTCF-IP-Blobel-Rep2-S1_S9_MACS2_rendition_1E-8_downsampled_try3_peak_1115	304	10.1695	30.4589	27.8476	249
chr1	74408439	74408821	Project004-IPSHOCH-Exp5-ChIP-ES-2i-CTCF-IP-Blobel-Rep2-S1_S9_MACS2_rendition_1E-8_downsampled_try3_peak_1116	1016	21.2143	101.683	98.1051	147
chr1	74433173	74433520	Project004-IPSHOCH-Exp5-ChIP-ES-2i-CTCF-IP-Blobel-Rep2-S1_S9_MACS2_rendition_1E-8_downsampled_try3_peak_1117	461	13.4746	46.1105	43.2946	176
chr1	74437172	74437971	Project004-IPSHOCH-Exp5-ChIP-ES-2i-CTCF-IP-Blobel-Rep2-S1_S9_MACS2_rendition_1E-8_downsampled_try3_peak_1118	655	14.2593	65.5017	62.4329	150
chr1	74443982	74444315	Project004-IPSHOCH-Exp5-ChIP-ES-2i-CTCF-IP-Blobel-Rep2-S1_S9_MACS2_rendition_1E-8_downsampled_try3_peak_1119	1095	30.8967	109.541	105.845	140
chr1	74444789	74445124	Project004-IPSHOCH-Exp5-ChIP-ES-2i-CTCF-IP-Blobel-Rep2-S1_S9_MACS2_rendition_1E-8_downsampled_try3_peak_1120	857	23.0484	85.7242	82.373	189
chr1	74488477	74488684	Project004-IPSHOCH-Exp5-ChIP-ES-2i-CTCF-IP-Blobel-Rep2-S1_S9_MACS2_rendition_1E-8_downsampled_try3_peak_1121	166	6.86441	16.6443	14.252	78
chr1	74488871	74489087	Project004-IPSHOCH-Exp5-ChIP-ES-2i-CTCF-IP-Blobel-Rep2-S1_S9_MACS2_rendition_1E-8_downsampled_try3_peak_1122	334	14.5939	33.4733	30.8201	76
chr1	74499353	74499596	Project004-IPSHOCH-Exp5-ChIP-ES-2i-CTCF-IP-Blobel-Rep2-S1_S9_MACS2_rendition_1E-8_downsampled_try3_peak_1123	512	14.4915	51.2195	48.3347	130
chr1	74502943	74503160	Project004-IPSHOCH-Exp5-ChIP-ES-2i-CTCF-IP-Blobel-Rep2-S1_S9_MACS2_rendition_1E-8_downsampled_try3_peak_1124	204	9.72973	20.4115	17.9491	90
chr1	74506871	74507174	Project004-IPSHOCH-Exp5-ChIP-ES-2i-CTCF-IP-Blobel-Rep2-S1_S9_MACS2_rendition_1E-8_downsampled_try3_peak_1125	579	17.3611	57.9471	54.9793	185
chr1	74586966	74587178	Project004-IPSHOCH-Exp5-ChIP-ES-2i-CTCF-IP-Blobel-Rep2-S1_S9_MACS2_rendition_1E-8_downsampled_try3_peak_1126	156	8.10811	15.6651	13.2917	107
chr1	74650460	74650820	Project004-IPSHOCH-Exp5-ChIP-ES-2i-CTCF-IP-Blobel-Rep2-S1_S9_MACS2_rendition_1E-8_downsampled_try3_peak_1127	241	10.9459	24.1597	21.6374	122
chr1	74690561	74690805	Project004-IPSHOCH-Exp5-ChIP-ES-2i-CTCF-IP-Blobel-Rep2-S1_S9_MACS2_rendition_1E-8_downsampled_try3_peak_1128	230	9.64609	23.0178	20.5137	101
chr1	74708225	74708456	Project004-IPSHOCH-Exp5-ChIP-ES-2i-CTCF-IP-Blobel-Rep2-S1_S9_MACS2_rendition_1E-8_downsampled_try3_peak_1129	464	17.9672	46.4092	43.5888	99
chr1	74721027	74721391	Project004-IPSHOCH-Exp5-ChIP-ES-2i-CTCF-IP-Blobel-Rep2-S1_S9_MACS2_rendition_1E-8_downsampled_try3_peak_1130	390	15.4054	39.0183	36.2879	237
chr1	74758582	74758873	Project004-IPSHOCH-Exp5-ChIP-ES-2i-CTCF-IP-Blobel-Rep2-S1_S9_MACS2_rendition_1E-8_downsampled_try3_peak_1131	204	10.4035	20.4761	18.0129	104
chr1	74759717	74759927	Project004-IPSHOCH-Exp5-ChIP-ES-2i-CTCF-IP-Blobel-Rep2-S1_S9_MACS2_rendition_1E-8_downsampled_try3_peak_1132	247	10.9352	24.7263	22.1977	118
chr1	74770308	74770693	Project004-IPSHOCH-Exp5-ChIP-ES-2i-CTCF-IP-Blobel-Rep2-S1_S9_MACS2_rendition_1E-8_downsampled_try3_peak_1133	944	31.4447	94.4057	90.9305	170
chr1	74795380	74795773	Project004-IPSHOCH-Exp5-ChIP-ES-2i-CTCF-IP-Blobel-Rep2-S1_S9_MACS2_rendition_1E-8_downsampled_try3_peak_1134	1217	26.9491	121.781	117.893	195
chr1	74803512	74803664	Project004-IPSHOCH-Exp5-ChIP-ES-2i-CTCF-IP-Blobel-Rep2-S1_S9_MACS2_rendition_1E-8_downsampled_try3_peak_1135	127	7.40997	12.7667	10.4559	39
chr1	74806462	74806747	Project004-IPSHOCH-Exp5-ChIP-ES-2i-CTCF-IP-Blobel-Rep2-S1_S9_MACS2_rendition_1E-8_downsampled_try3_peak_1136	712	16.5	71.2845	68.1339	144
chr1	74809698	74809991	Project004-IPSHOCH-Exp5-ChIP-ES-2i-CTCF-IP-Blobel-Rep2-S1_S9_MACS2_rendition_1E-8_downsampled_try3_peak_1137	917	27.6946	91.7164	88.2826	131
chr1	74822400	74822808	Project004-IPSHOCH-Exp5-ChIP-ES-2i-CTCF-IP-Blobel-Rep2-S1_S9_MACS2_rendition_1E-8_downsampled_try3_peak_1138	877	24.0625	87.7384	84.3566	242
chr1	74830961	74831411	Project004-IPSHOCH-Exp5-ChIP-ES-2i-CTCF-IP-Blobel-Rep2-S1_S9_MACS2_rendition_1E-8_downsampled_try3_peak_1139	1437	31.835	143.75	139.523	279
chr1	74834424	74834744	Project004-IPSHOCH-Exp5-ChIP-ES-2i-CTCF-IP-Blobel-Rep2-S1_S9_MACS2_rendition_1E-8_downsampled_try3_peak_1140	856	20.8475	85.6117	82.2655	177
chr1	74849594	74850096	Project004-IPSHOCH-Exp5-ChIP-ES-2i-CTCF-IP-Blobel-Rep2-S1_S9_MACS2_rendition_1E-8_downsampled_try3_peak_1141	795	16.2963	79.5333	76.2732	202
chr1	74852857	74853132	Project004-IPSHOCH-Exp5-ChIP-ES-2i-CTCF-IP-Blobel-Rep2-S1_S9_MACS2_rendition_1E-8_downsampled_try3_peak_1142	364	12.8125	36.4172	33.7228	149
chr1	74854562	74855111	Project004-IPSHOCH-Exp5-ChIP-ES-2i-CTCF-IP-Blobel-Rep2-S1_S9_MACS2_rendition_1E-8_downsampled_try3_peak_1143	1406	37.3635	140.648	136.466	321
chr1	74855616	74855889	Project004-IPSHOCH-Exp5-ChIP-ES-2i-CTCF-IP-Blobel-Rep2-S1_S9_MACS2_rendition_1E-8_downsampled_try3_peak_1144	486	13.9831	48.6494	45.7965	130
chr1	74861561	74861878	Project004-IPSHOCH-Exp5-ChIP-ES-2i-CTCF-IP-Blobel-Rep2-S1_S9_MACS2_rendition_1E-8_downsampled_try3_peak_1145	479	18.8668	47.949	45.1092	127
chr1	74862818	74862978	Project004-IPSHOCH-Exp5-ChIP-ES-2i-CTCF-IP-Blobel-Rep2-S1_S9_MACS2_rendition_1E-8_downsampled_try3_peak_1146	136	6.90862	13.6163	11.282	44
chr1	74870276	74870556	Project004-IPSHOCH-Exp5-ChIP-ES-2i-CTCF-IP-Blobel-Rep2-S1_S9_MACS2_rendition_1E-8_downsampled_try3_peak_1147	230	9.375	23.0745	20.5678	148
chr1	74908433	74908714	Project004-IPSHOCH-Exp5-ChIP-ES-2i-CTCF-IP-Blobel-Rep2-S1_S9_MACS2_rendition_1E-8_downsampled_try3_peak_1148	1000	35.9006	100.082	96.5261	144
chr1	74927351	74927715	Project004-IPSHOCH-Exp5-ChIP-ES-2i-CTCF-IP-Blobel-Rep2-S1_S9_MACS2_rendition_1E-8_downsampled_try3_peak_1149	1343	28.983	134.389	130.308	175
chr1	74939866	74940423	Project004-IPSHOCH-Exp5-ChIP-ES-2i-CTCF-IP-Blobel-Rep2-S1_S9_MACS2_rendition_1E-8_downsampled_try3_peak_1150	1249	22.4074	124.945	121.007	377
chr1	74941506	74941826	Project004-IPSHOCH-Exp5-ChIP-ES-2i-CTCF-IP-Blobel-Rep2-S1_S9_MACS2_rendition_1E-8_downsampled_try3_peak_1151	894	28.5823	89.4226	86.0176	192
chr1	74948270	74948637	Project004-IPSHOCH-Exp5-ChIP-ES-2i-CTCF-IP-Blobel-Rep2-S1_S9_MACS2_rendition_1E-8_downsampled_try3_peak_1152	822	26.1664	82.2803	78.9801	193
chr1	74962303	74962712	Project004-IPSHOCH-Exp5-ChIP-ES-2i-CTCF-IP-Blobel-Rep2-S1_S9_MACS2_rendition_1E-8_downsampled_try3_peak_1153	761	29.0373	76.1583	72.9404	230
chr1	74973291	74973658	Project004-IPSHOCH-Exp5-ChIP-ES-2i-CTCF-IP-Blobel-Rep2-S1_S9_MACS2_rendition_1E-8_downsampled_try3_peak_1154	1220	36.0811	122.044	118.149	180
chr1	74995158	74995894	Project004-IPSHOCH-Exp5-ChIP-ES-2i-CTCF-IP-Blobel-Rep2-S1_S9_MACS2_rendition_1E-8_downsampled_try3_peak_1155	924	25	92.4044	88.9614	413
chr1	75000799	75001076	Project004-IPSHOCH-Exp5-ChIP-ES-2i-CTCF-IP-Blobel-Rep2-S1_S9_MACS2_rendition_1E-8_downsampled_try3_peak_1156	753	27.5352	75.3877	72.1865	128
chr1	75010983	75011415	Project004-IPSHOCH-Exp5-ChIP-ES-2i-CTCF-IP-Blobel-Rep2-S1_S9_MACS2_rendition_1E-8_downsampled_try3_peak_1157	739	16.9286	73.9462	70.766	236
chr1	75020216	75020490	Project004-IPSHOCH-Exp5-ChIP-ES-2i-CTCF-IP-Blobel-Rep2-S1_S9_MACS2_rendition_1E-8_downsampled_try3_peak_1158	504	20.8147	50.4822	47.6095	134
chr1	75047065	75047481	Project004-IPSHOCH-Exp5-ChIP-ES-2i-CTCF-IP-Blobel-Rep2-S1_S9_MACS2_rendition_1E-8_downsampled_try3_peak_1159	1414	34.375	141.481	137.286	210
chr1	75063478	75064133	Project004-IPSHOCH-Exp5-ChIP-ES-2i-CTCF-IP-Blobel-Rep2-S1_S9_MACS2_rendition_1E-8_downsampled_try3_peak_1160	1325	42.087	132.5	128.449	163
chr1	75075452	75075735	Project004-IPSHOCH-Exp5-ChIP-ES-2i-CTCF-IP-Blobel-Rep2-S1_S9_MACS2_rendition_1E-8_downsampled_try3_peak_1161	419	17.9712	41.9443	39.1805	134
chr1	75098752	75099022	Project004-IPSHOCH-Exp5-ChIP-ES-2i-CTCF-IP-Blobel-Rep2-S1_S9_MACS2_rendition_1E-8_downsampled_try3_peak_1162	623	18.75	62.3143	59.2839	115
chr1	75118903	75119277	Project004-IPSHOCH-Exp5-ChIP-ES-2i-CTCF-IP-Blobel-Rep2-S1_S9_MACS2_rendition_1E-8_downsampled_try3_peak_1163	298	13.9776	29.8657	27.2618	104
chr1	75121059	75121363	Project004-IPSHOCH-Exp5-ChIP-ES-2i-CTCF-IP-Blobel-Rep2-S1_S9_MACS2_rendition_1E-8_downsampled_try3_peak_1164	1136	32.5599	113.62	109.856	160
chr1	75139238	75139634	Project004-IPSHOCH-Exp5-ChIP-ES-2i-CTCF-IP-Blobel-Rep2-S1_S9_MACS2_rendition_1E-8_downsampled_try3_peak_1165	1091	27.5383	109.119	105.429	138
chr1	75157746	75157907	Project004-IPSHOCH-Exp5-ChIP-ES-2i-CTCF-IP-Blobel-Rep2-S1_S9_MACS2_rendition_1E-8_downsampled_try3_peak_1166	145	7.7027	14.5288	12.1727	62
chr1	75159742	75159902	Project004-IPSHOCH-Exp5-ChIP-ES-2i-CTCF-IP-Blobel-Rep2-S1_S9_MACS2_rendition_1E-8_downsampled_try3_peak_1167	172	9.38043	17.2999	14.8928	60
chr1	75160201	75160463	Project004-IPSHOCH-Exp5-ChIP-ES-2i-CTCF-IP-Blobel-Rep2-S1_S9_MACS2_rendition_1E-8_downsampled_try3_peak_1168	347	14.5448	34.7391	32.071	148
chr1	75178798	75179038	Project004-IPSHOCH-Exp5-ChIP-ES-2i-CTCF-IP-Blobel-Rep2-S1_S9_MACS2_rendition_1E-8_downsampled_try3_peak_1169	267	11.7568	26.7382	24.1801	125
chr1	75216186	75216410	Project004-IPSHOCH-Exp5-ChIP-ES-2i-CTCF-IP-Blobel-Rep2-S1_S9_MACS2_rendition_1E-8_downsampled_try3_peak_1170	143	5.78571	14.3334	11.9909	137
chr1	75229045	75229453	Project004-IPSHOCH-Exp5-ChIP-ES-2i-CTCF-IP-Blobel-Rep2-S1_S9_MACS2_rendition_1E-8_downsampled_try3_peak_1171	585	19.4003	58.5552	55.577	145
chr1	75231281	75231582	Project004-IPSHOCH-Exp5-ChIP-ES-2i-CTCF-IP-Blobel-Rep2-S1_S9_MACS2_rendition_1E-8_downsampled_try3_peak_1172	631	16.7797	63.1445	60.1038	149
chr1	75237163	75237331	Project004-IPSHOCH-Exp5-ChIP-ES-2i-CTCF-IP-Blobel-Rep2-S1_S9_MACS2_rendition_1E-8_downsampled_try3_peak_1173	145	7.72291	14.5625	12.2064	65
chr1	75241325	75241530	Project004-IPSHOCH-Exp5-ChIP-ES-2i-CTCF-IP-Blobel-Rep2-S1_S9_MACS2_rendition_1E-8_downsampled_try3_peak_1174	325	13.2785	32.5568	29.9198	107
chr1	75248150	75248637	Project004-IPSHOCH-Exp5-ChIP-ES-2i-CTCF-IP-Blobel-Rep2-S1_S9_MACS2_rendition_1E-8_downsampled_try3_peak_1175	1549	43.3784	154.922	150.525	231
chr1	75249609	75249878	Project004-IPSHOCH-Exp5-ChIP-ES-2i-CTCF-IP-Blobel-Rep2-S1_S9_MACS2_rendition_1E-8_downsampled_try3_peak_1176	541	20.6636	54.1889	51.2651	142
chr1	75250782	75251175	Project004-IPSHOCH-Exp5-ChIP-ES-2i-CTCF-IP-Blobel-Rep2-S1_S9_MACS2_rendition_1E-8_downsampled_try3_peak_1177	1243	28.5699	124.312	120.385	244
chr1	75287272	75287556	Project004-IPSHOCH-Exp5-ChIP-ES-2i-CTCF-IP-Blobel-Rep2-S1_S9_MACS2_rendition_1E-8_downsampled_try3_peak_1178	722	22.6336	72.2298	69.0723	134
chr1	75291442	75291732	Project004-IPSHOCH-Exp5-ChIP-ES-2i-CTCF-IP-Blobel-Rep2-S1_S9_MACS2_rendition_1E-8_downsampled_try3_peak_1179	197	10.559	19.7277	17.2736	161
chr1	75314500	75314791	Project004-IPSHOCH-Exp5-ChIP-ES-2i-CTCF-IP-Blobel-Rep2-S1_S9_MACS2_rendition_1E-8_downsampled_try3_peak_1180	917	22.8559	91.7704	88.3351	149
chr1	75320006	75320203	Project004-IPSHOCH-Exp5-ChIP-ES-2i-CTCF-IP-Blobel-Rep2-S1_S9_MACS2_rendition_1E-8_downsampled_try3_peak_1181	196	10.1995	19.6246	17.1797	77
chr1	75324103	75324340	Project004-IPSHOCH-Exp5-ChIP-ES-2i-CTCF-IP-Blobel-Rep2-S1_S9_MACS2_rendition_1E-8_downsampled_try3_peak_1182	415	18.1802	41.5869	38.8315	131
chr1	75339434	75339761	Project004-IPSHOCH-Exp5-ChIP-ES-2i-CTCF-IP-Blobel-Rep2-S1_S9_MACS2_rendition_1E-8_downsampled_try3_peak_1183	730	15.3704	73.0771	69.9025	180
chr1	75360106	75360322	Project004-IPSHOCH-Exp5-ChIP-ES-2i-CTCF-IP-Blobel-Rep2-S1_S9_MACS2_rendition_1E-8_downsampled_try3_peak_1184	250	12.1422	25.0108	22.4792	105
chr1	75368017	75368365	Project004-IPSHOCH-Exp5-ChIP-ES-2i-CTCF-IP-Blobel-Rep2-S1_S9_MACS2_rendition_1E-8_downsampled_try3_peak_1185	987	26.25	98.7009	95.1647	137
chr1	75395303	75395626	Project004-IPSHOCH-Exp5-ChIP-ES-2i-CTCF-IP-Blobel-Rep2-S1_S9_MACS2_rendition_1E-8_downsampled_try3_peak_1186	680	14.6296	68.0052	64.9013	148
chr1	75410315	75410756	Project004-IPSHOCH-Exp5-ChIP-ES-2i-CTCF-IP-Blobel-Rep2-S1_S9_MACS2_rendition_1E-8_downsampled_try3_peak_1187	1622	50.9185	162.273	157.767	201
chr1	75422301	75422785	Project004-IPSHOCH-Exp5-ChIP-ES-2i-CTCF-IP-Blobel-Rep2-S1_S9_MACS2_rendition_1E-8_downsampled_try3_peak_1188	1488	31.2712	148.863	144.554	260
chr1	75430727	75430883	Project004-IPSHOCH-Exp5-ChIP-ES-2i-CTCF-IP-Blobel-Rep2-S1_S9_MACS2_rendition_1E-8_downsampled_try3_peak_1189	191	9.32432	19.1965	16.7542	103
chr1	75442272	75442658	Project004-IPSHOCH-Exp5-ChIP-ES-2i-CTCF-IP-Blobel-Rep2-S1_S9_MACS2_rendition_1E-8_downsampled_try3_peak_1190	1026	16.7476	102.626	99.0331	205
chr1	75453296	75453883	Project004-IPSHOCH-Exp5-ChIP-ES-2i-CTCF-IP-Blobel-Rep2-S1_S9_MACS2_rendition_1E-8_downsampled_try3_peak_1191	861	18.8571	86.1865	82.831	197
chr1	75464151	75464645	Project004-IPSHOCH-Exp5-ChIP-ES-2i-CTCF-IP-Blobel-Rep2-S1_S9_MACS2_rendition_1E-8_downsampled_try3_peak_1192	1131	34.054	113.178	109.421	242
chr1	75473718	75474355	Project004-IPSHOCH-Exp5-ChIP-ES-2i-CTCF-IP-Blobel-Rep2-S1_S9_MACS2_rendition_1E-8_downsampled_try3_peak_1193	911	15.4369	91.1332	87.7046	296
chr1	75491755	75492195	Project004-IPSHOCH-Exp5-ChIP-ES-2i-CTCF-IP-Blobel-Rep2-S1_S9_MACS2_rendition_1E-8_downsampled_try3_peak_1194	1280	31.875	128.002	124.015	215
chr1	75496044	75496335	Project004-IPSHOCH-Exp5-ChIP-ES-2i-CTCF-IP-Blobel-Rep2-S1_S9_MACS2_rendition_1E-8_downsampled_try3_peak_1195	411	12.4576	41.1311	38.3776	140
chr1	75543273	75543505	Project004-IPSHOCH-Exp5-ChIP-ES-2i-CTCF-IP-Blobel-Rep2-S1_S9_MACS2_rendition_1E-8_downsampled_try3_peak_1196	427	15.4484	42.7334	39.9601	111
chr1	75555920	75556561	Project004-IPSHOCH-Exp5-ChIP-ES-2i-CTCF-IP-Blobel-Rep2-S1_S9_MACS2_rendition_1E-8_downsampled_try3_peak_1197	2197	45.767	219.774	214.546	355
chr1	75575213	75575389	Project004-IPSHOCH-Exp5-ChIP-ES-2i-CTCF-IP-Blobel-Rep2-S1_S9_MACS2_rendition_1E-8_downsampled_try3_peak_1198	143	8.35934	14.3183	11.9762	82
chr1	75594257	75594596	Project004-IPSHOCH-Exp5-ChIP-ES-2i-CTCF-IP-Blobel-Rep2-S1_S9_MACS2_rendition_1E-8_downsampled_try3_peak_1199	970	32.3803	97.0068	93.4977	155
chr1	75605668	75605826	Project004-IPSHOCH-Exp5-ChIP-ES-2i-CTCF-IP-Blobel-Rep2-S1_S9_MACS2_rendition_1E-8_downsampled_try3_peak_1200	217	10.8764	21.7916	19.3065	60
chr1	75649133	75649413	Project004-IPSHOCH-Exp5-ChIP-ES-2i-CTCF-IP-Blobel-Rep2-S1_S9_MACS2_rendition_1E-8_downsampled_try3_peak_1201	568	22.7169	56.8712	53.9154	150
chr1	75650159	75650515	Project004-IPSHOCH-Exp5-ChIP-ES-2i-CTCF-IP-Blobel-Rep2-S1_S9_MACS2_rendition_1E-8_downsampled_try3_peak_1202	1045	29.8189	104.506	100.882	168
chr1	75678499	75678830	Project004-IPSHOCH-Exp5-ChIP-ES-2i-CTCF-IP-Blobel-Rep2-S1_S9_MACS2_rendition_1E-8_downsampled_try3_peak_1203	743	28.5093	74.3692	71.1746	182
chr1	75686941	75687195	Project004-IPSHOCH-Exp5-ChIP-ES-2i-CTCF-IP-Blobel-Rep2-S1_S9_MACS2_rendition_1E-8_downsampled_try3_peak_1204	282	13.7267	28.2431	25.6591	179
chr1	75738262	75738507	Project004-IPSHOCH-Exp5-ChIP-ES-2i-CTCF-IP-Blobel-Rep2-S1_S9_MACS2_rendition_1E-8_downsampled_try3_peak_1205	186	7.37288	18.6225	16.1885	143
chr1	75779655	75779838	Project004-IPSHOCH-Exp5-ChIP-ES-2i-CTCF-IP-Blobel-Rep2-S1_S9_MACS2_rendition_1E-8_downsampled_try3_peak_1206	164	7.5	16.4902	14.0994	64
chr1	75808820	75809024	Project004-IPSHOCH-Exp5-ChIP-ES-2i-CTCF-IP-Blobel-Rep2-S1_S9_MACS2_rendition_1E-8_downsampled_try3_peak_1207	239	12.1429	23.9023	21.3845	88
chr1	75897816	75897974	Project004-IPSHOCH-Exp5-ChIP-ES-2i-CTCF-IP-Blobel-Rep2-S1_S9_MACS2_rendition_1E-8_downsampled_try3_peak_1208	183	10.0311	18.3771	15.9485	64
chr1	75922316	75922689	Project004-IPSHOCH-Exp5-ChIP-ES-2i-CTCF-IP-Blobel-Rep2-S1_S9_MACS2_rendition_1E-8_downsampled_try3_peak_1209	785	22.1875	78.5596	75.3095	195
chr1	75952482	75952718	Project004-IPSHOCH-Exp5-ChIP-ES-2i-CTCF-IP-Blobel-Rep2-S1_S9_MACS2_rendition_1E-8_downsampled_try3_peak_1210	327	15.3106	32.7313	30.0878	118
chr1	75993895	75994094	Project004-IPSHOCH-Exp5-ChIP-ES-2i-CTCF-IP-Blobel-Rep2-S1_S9_MACS2_rendition_1E-8_downsampled_try3_peak_1211	255	12.48	25.5746	23.0301	69
chr1	76842099	76842423	Project004-IPSHOCH-Exp5-ChIP-ES-2i-CTCF-IP-Blobel-Rep2-S1_S9_MACS2_rendition_1E-8_downsampled_try3_peak_1212	327	15.3106	32.7313	30.0878	182
chr1	77017974	77018126	Project004-IPSHOCH-Exp5-ChIP-ES-2i-CTCF-IP-Blobel-Rep2-S1_S9_MACS2_rendition_1E-8_downsampled_try3_peak_1213	187	9.98403	18.7728	16.3377	91
chr1	77078280	77078541	Project004-IPSHOCH-Exp5-ChIP-ES-2i-CTCF-IP-Blobel-Rep2-S1_S9_MACS2_rendition_1E-8_downsampled_try3_peak_1214	436	19.0062	43.698	40.9081	114
chr1	77493260	77493528	Project004-IPSHOCH-Exp5-ChIP-ES-2i-CTCF-IP-Blobel-Rep2-S1_S9_MACS2_rendition_1E-8_downsampled_try3_peak_1215	315	12.7246	31.585	28.9576	122
chr1	77512814	77513250	Project004-IPSHOCH-Exp5-ChIP-ES-2i-CTCF-IP-Blobel-Rep2-S1_S9_MACS2_rendition_1E-8_downsampled_try3_peak_1216	1213	30.625	121.363	117.48	226
chr1	77558451	77558713	Project004-IPSHOCH-Exp5-ChIP-ES-2i-CTCF-IP-Blobel-Rep2-S1_S9_MACS2_rendition_1E-8_downsampled_try3_peak_1217	541	20.6636	54.1889	51.2651	112
chr1	77586082	77586368	Project004-IPSHOCH-Exp5-ChIP-ES-2i-CTCF-IP-Blobel-Rep2-S1_S9_MACS2_rendition_1E-8_downsampled_try3_peak_1218	522	19.0541	52.2186	49.3222	149
chr1	77688088	77688297	Project004-IPSHOCH-Exp5-ChIP-ES-2i-CTCF-IP-Blobel-Rep2-S1_S9_MACS2_rendition_1E-8_downsampled_try3_peak_1219	376	15	37.6044	34.895	116
chr1	77801823	77802051	Project004-IPSHOCH-Exp5-ChIP-ES-2i-CTCF-IP-Blobel-Rep2-S1_S9_MACS2_rendition_1E-8_downsampled_try3_peak_1220	253	12.6708	25.3317	22.7939	116
chr1	77892894	77893057	Project004-IPSHOCH-Exp5-ChIP-ES-2i-CTCF-IP-Blobel-Rep2-S1_S9_MACS2_rendition_1E-8_downsampled_try3_peak_1221	156	8.10811	15.6651	13.2917	141
chr1	77927268	77927616	Project004-IPSHOCH-Exp5-ChIP-ES-2i-CTCF-IP-Blobel-Rep2-S1_S9_MACS2_rendition_1E-8_downsampled_try3_peak_1222	926	30.9955	92.649	89.1978	210
chr1	77939714	77940000	Project004-IPSHOCH-Exp5-ChIP-ES-2i-CTCF-IP-Blobel-Rep2-S1_S9_MACS2_rendition_1E-8_downsampled_try3_peak_1223	541	20.6636	54.1889	51.2651	163
chr1	77968934	77969293	Project004-IPSHOCH-Exp5-ChIP-ES-2i-CTCF-IP-Blobel-Rep2-S1_S9_MACS2_rendition_1E-8_downsampled_try3_peak_1224	1184	35.2703	118.483	114.645	177
chr1	77975318	77975592	Project004-IPSHOCH-Exp5-ChIP-ES-2i-CTCF-IP-Blobel-Rep2-S1_S9_MACS2_rendition_1E-8_downsampled_try3_peak_1225	1100	33.4821	110.089	106.379	147
chr1	77997515	77997705	Project004-IPSHOCH-Exp5-ChIP-ES-2i-CTCF-IP-Blobel-Rep2-S1_S9_MACS2_rendition_1E-8_downsampled_try3_peak_1226	239	12.1429	23.9023	21.3845	70
chr1	78005354	78005679	Project004-IPSHOCH-Exp5-ChIP-ES-2i-CTCF-IP-Blobel-Rep2-S1_S9_MACS2_rendition_1E-8_downsampled_try3_peak_1227	1045	29.8189	104.506	100.882	151
chr1	78033379	78033606	Project004-IPSHOCH-Exp5-ChIP-ES-2i-CTCF-IP-Blobel-Rep2-S1_S9_MACS2_rendition_1E-8_downsampled_try3_peak_1228	297	14.2547	29.7236	27.1208	97
chr1	78196825	78197027	Project004-IPSHOCH-Exp5-ChIP-ES-2i-CTCF-IP-Blobel-Rep2-S1_S9_MACS2_rendition_1E-8_downsampled_try3_peak_1229	274	13.2747	27.4835	24.915	134
chr1	78227396	78227656	Project004-IPSHOCH-Exp5-ChIP-ES-2i-CTCF-IP-Blobel-Rep2-S1_S9_MACS2_rendition_1E-8_downsampled_try3_peak_1230	179	8.91892	17.9999	15.579	128
chr1	78264086	78264454	Project004-IPSHOCH-Exp5-ChIP-ES-2i-CTCF-IP-Blobel-Rep2-S1_S9_MACS2_rendition_1E-8_downsampled_try3_peak_1231	743	28.5093	74.3692	71.1746	217
chr1	78416219	78416531	Project004-IPSHOCH-Exp5-ChIP-ES-2i-CTCF-IP-Blobel-Rep2-S1_S9_MACS2_rendition_1E-8_downsampled_try3_peak_1232	631	16.7797	63.1445	60.1038	142
chr1	78451289	78451627	Project004-IPSHOCH-Exp5-ChIP-ES-2i-CTCF-IP-Blobel-Rep2-S1_S9_MACS2_rendition_1E-8_downsampled_try3_peak_1233	591	16.017	59.107	56.1212	155
chr1	78517588	78517745	Project004-IPSHOCH-Exp5-ChIP-ES-2i-CTCF-IP-Blobel-Rep2-S1_S9_MACS2_rendition_1E-8_downsampled_try3_peak_1234	204	10.4035	20.4761	18.0129	56
chr1	78521765	78522271	Project004-IPSHOCH-Exp5-ChIP-ES-2i-CTCF-IP-Blobel-Rep2-S1_S9_MACS2_rendition_1E-8_downsampled_try3_peak_1235	2372	60.8395	237.204	231.778	229
chr1	78527119	78527272	Project004-IPSHOCH-Exp5-ChIP-ES-2i-CTCF-IP-Blobel-Rep2-S1_S9_MACS2_rendition_1E-8_downsampled_try3_peak_1236	198	9.37305	19.804	17.3492	103
chr1	78533439	78533672	Project004-IPSHOCH-Exp5-ChIP-ES-2i-CTCF-IP-Blobel-Rep2-S1_S9_MACS2_rendition_1E-8_downsampled_try3_peak_1237	758	25.1351	75.8121	72.599	121
chr1	78553957	78554267	Project004-IPSHOCH-Exp5-ChIP-ES-2i-CTCF-IP-Blobel-Rep2-S1_S9_MACS2_rendition_1E-8_downsampled_try3_peak_1238	848	29.7919	84.8036	81.4669	173
chr1	78683483	78683855	Project004-IPSHOCH-Exp5-ChIP-ES-2i-CTCF-IP-Blobel-Rep2-S1_S9_MACS2_rendition_1E-8_downsampled_try3_peak_1239	537	19.4595	53.7338	50.8181	196
chr1	78703895	78704173	Project004-IPSHOCH-Exp5-ChIP-ES-2i-CTCF-IP-Blobel-Rep2-S1_S9_MACS2_rendition_1E-8_downsampled_try3_peak_1240	464	17.5577	46.4691	43.6477	132
chr1	78721059	78721374	Project004-IPSHOCH-Exp5-ChIP-ES-2i-CTCF-IP-Blobel-Rep2-S1_S9_MACS2_rendition_1E-8_downsampled_try3_peak_1241	774	25.5405	77.4452	74.2101	154
chr1	78843076	78843390	Project004-IPSHOCH-Exp5-ChIP-ES-2i-CTCF-IP-Blobel-Rep2-S1_S9_MACS2_rendition_1E-8_downsampled_try3_peak_1242	637	19.0625	63.7575	60.7106	146
chr1	78966149	78966395	Project004-IPSHOCH-Exp5-ChIP-ES-2i-CTCF-IP-Blobel-Rep2-S1_S9_MACS2_rendition_1E-8_downsampled_try3_peak_1243	390	15.4054	39.0183	36.2879	89
chr1	79607958	79608222	Project004-IPSHOCH-Exp5-ChIP-ES-2i-CTCF-IP-Blobel-Rep2-S1_S9_MACS2_rendition_1E-8_downsampled_try3_peak_1244	327	15.3106	32.7313	30.0878	129
chr1	79611104	79611333	Project004-IPSHOCH-Exp5-ChIP-ES-2i-CTCF-IP-Blobel-Rep2-S1_S9_MACS2_rendition_1E-8_downsampled_try3_peak_1245	389	17.4224	38.9194	36.1955	107
chr1	79622793	79623042	Project004-IPSHOCH-Exp5-ChIP-ES-2i-CTCF-IP-Blobel-Rep2-S1_S9_MACS2_rendition_1E-8_downsampled_try3_peak_1246	342	15.8385	34.2574	31.5934	120
chr1	79679579	79679885	Project004-IPSHOCH-Exp5-ChIP-ES-2i-CTCF-IP-Blobel-Rep2-S1_S9_MACS2_rendition_1E-8_downsampled_try3_peak_1247	436	19.0062	43.698	40.9081	137
chr1	79779081	79779371	Project004-IPSHOCH-Exp5-ChIP-ES-2i-CTCF-IP-Blobel-Rep2-S1_S9_MACS2_rendition_1E-8_downsampled_try3_peak_1248	455	15	45.5931	42.7806	127
chr1	79783141	79783362	Project004-IPSHOCH-Exp5-ChIP-ES-2i-CTCF-IP-Blobel-Rep2-S1_S9_MACS2_rendition_1E-8_downsampled_try3_peak_1249	469	20.0621	46.9438	44.1126	121
chr1	80031054	80031260	Project004-IPSHOCH-Exp5-ChIP-ES-2i-CTCF-IP-Blobel-Rep2-S1_S9_MACS2_rendition_1E-8_downsampled_try3_peak_1250	210	11.087	21.0994	18.6237	86
chr1	80102978	80103225	Project004-IPSHOCH-Exp5-ChIP-ES-2i-CTCF-IP-Blobel-Rep2-S1_S9_MACS2_rendition_1E-8_downsampled_try3_peak_1251	242	9.6875	24.2245	21.699	106
chr1	80149778	80150044	Project004-IPSHOCH-Exp5-ChIP-ES-2i-CTCF-IP-Blobel-Rep2-S1_S9_MACS2_rendition_1E-8_downsampled_try3_peak_1252	638	25.3416	63.8073	60.7572	130
chr1	80174743	80174895	Project004-IPSHOCH-Exp5-ChIP-ES-2i-CTCF-IP-Blobel-Rep2-S1_S9_MACS2_rendition_1E-8_downsampled_try3_peak_1253	144	8.44721	14.4632	12.1115	106
chr1	80176762	80177177	Project004-IPSHOCH-Exp5-ChIP-ES-2i-CTCF-IP-Blobel-Rep2-S1_S9_MACS2_rendition_1E-8_downsampled_try3_peak_1254	779	29.5652	77.9552	74.7149	205
chr1	80177411	80177911	Project004-IPSHOCH-Exp5-ChIP-ES-2i-CTCF-IP-Blobel-Rep2-S1_S9_MACS2_rendition_1E-8_downsampled_try3_peak_1255	566	17.5	56.6146	53.6626	344
chr1	80227315	80227485	Project004-IPSHOCH-Exp5-ChIP-ES-2i-CTCF-IP-Blobel-Rep2-S1_S9_MACS2_rendition_1E-8_downsampled_try3_peak_1256	179	6.64286	17.9624	15.5458	69
chr1	80240751	80240988	Project004-IPSHOCH-Exp5-ChIP-ES-2i-CTCF-IP-Blobel-Rep2-S1_S9_MACS2_rendition_1E-8_downsampled_try3_peak_1257	171	9.27831	17.1317	14.7249	102
chr1	80296163	80296433	Project004-IPSHOCH-Exp5-ChIP-ES-2i-CTCF-IP-Blobel-Rep2-S1_S9_MACS2_rendition_1E-8_downsampled_try3_peak_1258	200	9.83915	20.0631	17.6067	149
chr1	80405156	80405401	Project004-IPSHOCH-Exp5-ChIP-ES-2i-CTCF-IP-Blobel-Rep2-S1_S9_MACS2_rendition_1E-8_downsampled_try3_peak_1259	560	21.7528	56.0456	53.0998	147
chr1	80412025	80412200	Project004-IPSHOCH-Exp5-ChIP-ES-2i-CTCF-IP-Blobel-Rep2-S1_S9_MACS2_rendition_1E-8_downsampled_try3_peak_1260	170	9.50311	17.0487	14.6428	77
chr1	80501401	80501638	Project004-IPSHOCH-Exp5-ChIP-ES-2i-CTCF-IP-Blobel-Rep2-S1_S9_MACS2_rendition_1E-8_downsampled_try3_peak_1261	537	19.4595	53.7338	50.8181	116
chr1	80509288	80509451	Project004-IPSHOCH-Exp5-ChIP-ES-2i-CTCF-IP-Blobel-Rep2-S1_S9_MACS2_rendition_1E-8_downsampled_try3_peak_1262	291	12.8337	29.1957	26.6033	84
chr1	80512433	80512802	Project004-IPSHOCH-Exp5-ChIP-ES-2i-CTCF-IP-Blobel-Rep2-S1_S9_MACS2_rendition_1E-8_downsampled_try3_peak_1263	453	19.5342	45.3151	42.5059	222
chr1	80518788	80519145	Project004-IPSHOCH-Exp5-ChIP-ES-2i-CTCF-IP-Blobel-Rep2-S1_S9_MACS2_rendition_1E-8_downsampled_try3_peak_1264	566	17.5	56.6146	53.6626	192
chr1	80533914	80534079	Project004-IPSHOCH-Exp5-ChIP-ES-2i-CTCF-IP-Blobel-Rep2-S1_S9_MACS2_rendition_1E-8_downsampled_try3_peak_1265	183	10.0311	18.3771	15.9485	88
chr1	80652499	80652762	Project004-IPSHOCH-Exp5-ChIP-ES-2i-CTCF-IP-Blobel-Rep2-S1_S9_MACS2_rendition_1E-8_downsampled_try3_peak_1266	498	20.4672	49.8927	47.0264	133
chr1	80719283	80719565	Project004-IPSHOCH-Exp5-ChIP-ES-2i-CTCF-IP-Blobel-Rep2-S1_S9_MACS2_rendition_1E-8_downsampled_try3_peak_1267	419	17.9712	41.9443	39.1805	143
chr1	80724810	80725049	Project004-IPSHOCH-Exp5-ChIP-ES-2i-CTCF-IP-Blobel-Rep2-S1_S9_MACS2_rendition_1E-8_downsampled_try3_peak_1268	363	14.6995	36.3834	33.6913	116
chr1	80826998	80827218	Project004-IPSHOCH-Exp5-ChIP-ES-2i-CTCF-IP-Blobel-Rep2-S1_S9_MACS2_rendition_1E-8_downsampled_try3_peak_1269	293	9.91525	29.3234	26.7296	139
chr1	80860032	80860192	Project004-IPSHOCH-Exp5-ChIP-ES-2i-CTCF-IP-Blobel-Rep2-S1_S9_MACS2_rendition_1E-8_downsampled_try3_peak_1270	183	10.0311	18.3771	15.9485	53
chr1	81283728	81284048	Project004-IPSHOCH-Exp5-ChIP-ES-2i-CTCF-IP-Blobel-Rep2-S1_S9_MACS2_rendition_1E-8_downsampled_try3_peak_1271	502	21.118	50.2346	47.3624	212
chr1	81297384	81297621	Project004-IPSHOCH-Exp5-ChIP-ES-2i-CTCF-IP-Blobel-Rep2-S1_S9_MACS2_rendition_1E-8_downsampled_try3_peak_1272	342	15.8385	34.2574	31.5934	95
chr1	81298352	81298573	Project004-IPSHOCH-Exp5-ChIP-ES-2i-CTCF-IP-Blobel-Rep2-S1_S9_MACS2_rendition_1E-8_downsampled_try3_peak_1273	435	18.4704	43.5115	40.7285	82
chr1	81299991	81300308	Project004-IPSHOCH-Exp5-ChIP-ES-2i-CTCF-IP-Blobel-Rep2-S1_S9_MACS2_rendition_1E-8_downsampled_try3_peak_1274	253	12.6708	25.3317	22.7939	120
chr1	81303998	81304318	Project004-IPSHOCH-Exp5-ChIP-ES-2i-CTCF-IP-Blobel-Rep2-S1_S9_MACS2_rendition_1E-8_downsampled_try3_peak_1275	342	15.8385	34.2574	31.5934	169
chr1	81306753	81306988	Project004-IPSHOCH-Exp5-ChIP-ES-2i-CTCF-IP-Blobel-Rep2-S1_S9_MACS2_rendition_1E-8_downsampled_try3_peak_1276	485	20.5901	48.5837	45.7327	120
chr1	81313177	81313507	Project004-IPSHOCH-Exp5-ChIP-ES-2i-CTCF-IP-Blobel-Rep2-S1_S9_MACS2_rendition_1E-8_downsampled_try3_peak_1277	806	25.7759	80.6473	77.3711	160
chr1	81316393	81316650	Project004-IPSHOCH-Exp5-ChIP-ES-2i-CTCF-IP-Blobel-Rep2-S1_S9_MACS2_rendition_1E-8_downsampled_try3_peak_1278	404	17.9503	40.4998	37.7504	125
chr1	81513204	81513527	Project004-IPSHOCH-Exp5-ChIP-ES-2i-CTCF-IP-Blobel-Rep2-S1_S9_MACS2_rendition_1E-8_downsampled_try3_peak_1279	429	14.375	42.9238	40.148	141
chr1	81588252	81588521	Project004-IPSHOCH-Exp5-ChIP-ES-2i-CTCF-IP-Blobel-Rep2-S1_S9_MACS2_rendition_1E-8_downsampled_try3_peak_1280	313	11.5625	31.3987	28.7727	162
chr1	82285286	82285496	Project004-IPSHOCH-Exp5-ChIP-ES-2i-CTCF-IP-Blobel-Rep2-S1_S9_MACS2_rendition_1E-8_downsampled_try3_peak_1281	260	12.7641	26.0496	23.5004	103
chr1	82286812	82287027	Project004-IPSHOCH-Exp5-ChIP-ES-2i-CTCF-IP-Blobel-Rep2-S1_S9_MACS2_rendition_1E-8_downsampled_try3_peak_1282	144	6.875	14.4294	12.0842	78
chr1	82290682	82291011	Project004-IPSHOCH-Exp5-ChIP-ES-2i-CTCF-IP-Blobel-Rep2-S1_S9_MACS2_rendition_1E-8_downsampled_try3_peak_1283	454	19.1831	45.4516	42.6421	210
chr1	82429984	82430398	Project004-IPSHOCH-Exp5-ChIP-ES-2i-CTCF-IP-Blobel-Rep2-S1_S9_MACS2_rendition_1E-8_downsampled_try3_peak_1284	411	12.4576	41.1311	38.3776	125
chr1	82472891	82473203	Project004-IPSHOCH-Exp5-ChIP-ES-2i-CTCF-IP-Blobel-Rep2-S1_S9_MACS2_rendition_1E-8_downsampled_try3_peak_1285	1114	39.0683	111.499	107.77	151
chr1	82478070	82478222	Project004-IPSHOCH-Exp5-ChIP-ES-2i-CTCF-IP-Blobel-Rep2-S1_S9_MACS2_rendition_1E-8_downsampled_try3_peak_1286	183	10.0311	18.3771	15.9485	79
chr1	82550920	82551203	Project004-IPSHOCH-Exp5-ChIP-ES-2i-CTCF-IP-Blobel-Rep2-S1_S9_MACS2_rendition_1E-8_downsampled_try3_peak_1287	567	20.2703	56.7908	53.8352	166
chr1	82568400	82568667	Project004-IPSHOCH-Exp5-ChIP-ES-2i-CTCF-IP-Blobel-Rep2-S1_S9_MACS2_rendition_1E-8_downsampled_try3_peak_1288	477	17.8378	47.7286	44.8901	141
chr1	82635127	82635288	Project004-IPSHOCH-Exp5-ChIP-ES-2i-CTCF-IP-Blobel-Rep2-S1_S9_MACS2_rendition_1E-8_downsampled_try3_peak_1289	183	9.98487	18.3002	15.8779	64
chr1	82638291	82638626	Project004-IPSHOCH-Exp5-ChIP-ES-2i-CTCF-IP-Blobel-Rep2-S1_S9_MACS2_rendition_1E-8_downsampled_try3_peak_1290	1171	35.1154	117.153	113.337	144
chr1	82756151	82756454	Project004-IPSHOCH-Exp5-ChIP-ES-2i-CTCF-IP-Blobel-Rep2-S1_S9_MACS2_rendition_1E-8_downsampled_try3_peak_1291	907	28.7838	90.7481	87.3254	168
chr1	82758944	82759177	Project004-IPSHOCH-Exp5-ChIP-ES-2i-CTCF-IP-Blobel-Rep2-S1_S9_MACS2_rendition_1E-8_downsampled_try3_peak_1292	301	11.25	30.1722	27.5636	118
chr1	82769721	82770003	Project004-IPSHOCH-Exp5-ChIP-ES-2i-CTCF-IP-Blobel-Rep2-S1_S9_MACS2_rendition_1E-8_downsampled_try3_peak_1293	403	17.024	40.3441	37.6039	137
chr1	82783898	82784239	Project004-IPSHOCH-Exp5-ChIP-ES-2i-CTCF-IP-Blobel-Rep2-S1_S9_MACS2_rendition_1E-8_downsampled_try3_peak_1294	849	30.9682	84.9333	81.595	202
chr1	82785923	82786214	Project004-IPSHOCH-Exp5-ChIP-ES-2i-CTCF-IP-Blobel-Rep2-S1_S9_MACS2_rendition_1E-8_downsampled_try3_peak_1295	502	20.6976	50.2834	47.4111	137
chr1	82800219	82800543	Project004-IPSHOCH-Exp5-ChIP-ES-2i-CTCF-IP-Blobel-Rep2-S1_S9_MACS2_rendition_1E-8_downsampled_try3_peak_1296	693	23.5135	69.35	66.2263	132
chr1	82835774	82836193	Project004-IPSHOCH-Exp5-ChIP-ES-2i-CTCF-IP-Blobel-Rep2-S1_S9_MACS2_rendition_1E-8_downsampled_try3_peak_1297	2032	45.3125	203.203	198.17	173
chr1	82909735	82909994	Project004-IPSHOCH-Exp5-ChIP-ES-2i-CTCF-IP-Blobel-Rep2-S1_S9_MACS2_rendition_1E-8_downsampled_try3_peak_1298	280	12.1622	28.0497	25.4722	135
chr1	82956640	82956914	Project004-IPSHOCH-Exp5-ChIP-ES-2i-CTCF-IP-Blobel-Rep2-S1_S9_MACS2_rendition_1E-8_downsampled_try3_peak_1299	510	16.25	51.0377	48.1559	145
chr1	82984385	82984711	Project004-IPSHOCH-Exp5-ChIP-ES-2i-CTCF-IP-Blobel-Rep2-S1_S9_MACS2_rendition_1E-8_downsampled_try3_peak_1300	807	26.3514	80.732	77.4509	150
chr1	82996988	82997222	Project004-IPSHOCH-Exp5-ChIP-ES-2i-CTCF-IP-Blobel-Rep2-S1_S9_MACS2_rendition_1E-8_downsampled_try3_peak_1301	453	19.5342	45.3151	42.5059	123
chr1	83041777	83041929	Project004-IPSHOCH-Exp5-ChIP-ES-2i-CTCF-IP-Blobel-Rep2-S1_S9_MACS2_rendition_1E-8_downsampled_try3_peak_1302	174	9.48482	17.4721	15.0624	36
chr1	83061394	83061753	Project004-IPSHOCH-Exp5-ChIP-ES-2i-CTCF-IP-Blobel-Rep2-S1_S9_MACS2_rendition_1E-8_downsampled_try3_peak_1303	638	25.3416	63.8073	60.7572	178
chr1	83072764	83073043	Project004-IPSHOCH-Exp5-ChIP-ES-2i-CTCF-IP-Blobel-Rep2-S1_S9_MACS2_rendition_1E-8_downsampled_try3_peak_1304	690	21.4167	69.0968	65.9798	142
chr1	83135282	83135582	Project004-IPSHOCH-Exp5-ChIP-ES-2i-CTCF-IP-Blobel-Rep2-S1_S9_MACS2_rendition_1E-8_downsampled_try3_peak_1305	455	15	45.5931	42.7806	176
chr1	83146707	83147153	Project004-IPSHOCH-Exp5-ChIP-ES-2i-CTCF-IP-Blobel-Rep2-S1_S9_MACS2_rendition_1E-8_downsampled_try3_peak_1306	537	19.4595	53.7338	50.8181	279
chr1	83183764	83184098	Project004-IPSHOCH-Exp5-ChIP-ES-2i-CTCF-IP-Blobel-Rep2-S1_S9_MACS2_rendition_1E-8_downsampled_try3_peak_1307	833	31.1491	83.3915	80.0737	152
chr1	83219712	83219927	Project004-IPSHOCH-Exp5-ChIP-ES-2i-CTCF-IP-Blobel-Rep2-S1_S9_MACS2_rendition_1E-8_downsampled_try3_peak_1308	469	20.0621	46.9438	44.1126	107
chr1	83359771	83359937	Project004-IPSHOCH-Exp5-ChIP-ES-2i-CTCF-IP-Blobel-Rep2-S1_S9_MACS2_rendition_1E-8_downsampled_try3_peak_1309	183	10.0311	18.3771	15.9485	113
chr1	83713698	83713906	Project004-IPSHOCH-Exp5-ChIP-ES-2i-CTCF-IP-Blobel-Rep2-S1_S9_MACS2_rendition_1E-8_downsampled_try3_peak_1310	453	19.5342	45.3151	42.5059	98
chr1	83723791	83724013	Project004-IPSHOCH-Exp5-ChIP-ES-2i-CTCF-IP-Blobel-Rep2-S1_S9_MACS2_rendition_1E-8_downsampled_try3_peak_1311	447	17.027	44.7837	41.9846	134
chr1	83733045	83733327	Project004-IPSHOCH-Exp5-ChIP-ES-2i-CTCF-IP-Blobel-Rep2-S1_S9_MACS2_rendition_1E-8_downsampled_try3_peak_1312	469	15.3125	46.9413	44.1126	163
chr1	83742661	83742925	Project004-IPSHOCH-Exp5-ChIP-ES-2i-CTCF-IP-Blobel-Rep2-S1_S9_MACS2_rendition_1E-8_downsampled_try3_peak_1313	449	18.4426	44.9427	42.1399	128
chr1	83807807	83808100	Project004-IPSHOCH-Exp5-ChIP-ES-2i-CTCF-IP-Blobel-Rep2-S1_S9_MACS2_rendition_1E-8_downsampled_try3_peak_1314	741	24.7297	74.1858	70.9967	138
chr1	83942482	83942693	Project004-IPSHOCH-Exp5-ChIP-ES-2i-CTCF-IP-Blobel-Rep2-S1_S9_MACS2_rendition_1E-8_downsampled_try3_peak_1315	373	16.4736	37.3156	34.6168	89
chr1	84098691	84098991	Project004-IPSHOCH-Exp5-ChIP-ES-2i-CTCF-IP-Blobel-Rep2-S1_S9_MACS2_rendition_1E-8_downsampled_try3_peak_1316	601	21.2326	60.1473	57.1485	127
chr1	84125116	84125412	Project004-IPSHOCH-Exp5-ChIP-ES-2i-CTCF-IP-Blobel-Rep2-S1_S9_MACS2_rendition_1E-8_downsampled_try3_peak_1317	586	23.7578	58.6448	55.6626	148
chr1	84126944	84127171	Project004-IPSHOCH-Exp5-ChIP-ES-2i-CTCF-IP-Blobel-Rep2-S1_S9_MACS2_rendition_1E-8_downsampled_try3_peak_1318	267	11.7568	26.7382	24.1801	118
chr1	84150467	84150859	Project004-IPSHOCH-Exp5-ChIP-ES-2i-CTCF-IP-Blobel-Rep2-S1_S9_MACS2_rendition_1E-8_downsampled_try3_peak_1319	1008	34.0479	100.87	97.3016	229
chr1	84279749	84279923	Project004-IPSHOCH-Exp5-ChIP-ES-2i-CTCF-IP-Blobel-Rep2-S1_S9_MACS2_rendition_1E-8_downsampled_try3_peak_1320	235	9.62196	23.5358	21.0256	67
chr1	84283410	84283768	Project004-IPSHOCH-Exp5-ChIP-ES-2i-CTCF-IP-Blobel-Rep2-S1_S9_MACS2_rendition_1E-8_downsampled_try3_peak_1321	995	28.7411	99.5184	95.9692	164
chr1	84466952	84467338	Project004-IPSHOCH-Exp5-ChIP-ES-2i-CTCF-IP-Blobel-Rep2-S1_S9_MACS2_rendition_1E-8_downsampled_try3_peak_1322	1268	40.6683	126.808	122.841	161
chr1	84578439	84578755	Project004-IPSHOCH-Exp5-ChIP-ES-2i-CTCF-IP-Blobel-Rep2-S1_S9_MACS2_rendition_1E-8_downsampled_try3_peak_1323	741	24.7297	74.1858	70.9967	148
chr1	84619720	84619964	Project004-IPSHOCH-Exp5-ChIP-ES-2i-CTCF-IP-Blobel-Rep2-S1_S9_MACS2_rendition_1E-8_downsampled_try3_peak_1324	373	16.0782	37.3373	34.6379	114
chr1	84692678	84693010	Project004-IPSHOCH-Exp5-ChIP-ES-2i-CTCF-IP-Blobel-Rep2-S1_S9_MACS2_rendition_1E-8_downsampled_try3_peak_1325	464	18.4176	46.414	43.5931	180
chr1	84693599	84694225	Project004-IPSHOCH-Exp5-ChIP-ES-2i-CTCF-IP-Blobel-Rep2-S1_S9_MACS2_rendition_1E-8_downsampled_try3_peak_1326	1140	25.678	114.032	110.263	416
chr1	84705306	84705573	Project004-IPSHOCH-Exp5-ChIP-ES-2i-CTCF-IP-Blobel-Rep2-S1_S9_MACS2_rendition_1E-8_downsampled_try3_peak_1327	176	8.98357	17.6092	15.1961	42
chr1	84730440	84730786	Project004-IPSHOCH-Exp5-ChIP-ES-2i-CTCF-IP-Blobel-Rep2-S1_S9_MACS2_rendition_1E-8_downsampled_try3_peak_1328	655	14.2593	65.5017	62.4329	151
chr1	84738110	84738275	Project004-IPSHOCH-Exp5-ChIP-ES-2i-CTCF-IP-Blobel-Rep2-S1_S9_MACS2_rendition_1E-8_downsampled_try3_peak_1329	170	6.42857	17.0335	14.6336	68
chr1	84813827	84813979	Project004-IPSHOCH-Exp5-ChIP-ES-2i-CTCF-IP-Blobel-Rep2-S1_S9_MACS2_rendition_1E-8_downsampled_try3_peak_1330	135	7.34974	13.5018	11.1694	46
chr1	84838433	84838646	Project004-IPSHOCH-Exp5-ChIP-ES-2i-CTCF-IP-Blobel-Rep2-S1_S9_MACS2_rendition_1E-8_downsampled_try3_peak_1331	193	9.43427	19.3823	16.939	114
chr1	84863342	84863632	Project004-IPSHOCH-Exp5-ChIP-ES-2i-CTCF-IP-Blobel-Rep2-S1_S9_MACS2_rendition_1E-8_downsampled_try3_peak_1332	623	18.75	62.3143	59.2839	150
chr1	84866132	84866513	Project004-IPSHOCH-Exp5-ChIP-ES-2i-CTCF-IP-Blobel-Rep2-S1_S9_MACS2_rendition_1E-8_downsampled_try3_peak_1333	706	21.7622	70.6187	67.4832	166
chr1	84876266	84876693	Project004-IPSHOCH-Exp5-ChIP-ES-2i-CTCF-IP-Blobel-Rep2-S1_S9_MACS2_rendition_1E-8_downsampled_try3_peak_1334	424	11.5714	42.4552	39.6834	205
chr1	84877147	84877381	Project004-IPSHOCH-Exp5-ChIP-ES-2i-CTCF-IP-Blobel-Rep2-S1_S9_MACS2_rendition_1E-8_downsampled_try3_peak_1335	310	12.0901	31.098	28.4806	135
chr1	84877884	84878213	Project004-IPSHOCH-Exp5-ChIP-ES-2i-CTCF-IP-Blobel-Rep2-S1_S9_MACS2_rendition_1E-8_downsampled_try3_peak_1336	1095	30.8967	109.541	105.845	151
chr1	84881801	84882159	Project004-IPSHOCH-Exp5-ChIP-ES-2i-CTCF-IP-Blobel-Rep2-S1_S9_MACS2_rendition_1E-8_downsampled_try3_peak_1337	696	23.6825	69.6466	66.518	168
chr1	84882502	84882863	Project004-IPSHOCH-Exp5-ChIP-ES-2i-CTCF-IP-Blobel-Rep2-S1_S9_MACS2_rendition_1E-8_downsampled_try3_peak_1338	1167	34.8649	116.709	112.899	177
chr1	84930073	84930433	Project004-IPSHOCH-Exp5-ChIP-ES-2i-CTCF-IP-Blobel-Rep2-S1_S9_MACS2_rendition_1E-8_downsampled_try3_peak_1339	1302	31.4296	130.258	126.238	157
chr1	84991441	84991627	Project004-IPSHOCH-Exp5-ChIP-ES-2i-CTCF-IP-Blobel-Rep2-S1_S9_MACS2_rendition_1E-8_downsampled_try3_peak_1340	290	9	29.0021	26.4107	55
chr1	85065737	85065941	Project004-IPSHOCH-Exp5-ChIP-ES-2i-CTCF-IP-Blobel-Rep2-S1_S9_MACS2_rendition_1E-8_downsampled_try3_peak_1341	289	10.9375	28.9576	26.3673	79
chr1	85111393	85111710	Project004-IPSHOCH-Exp5-ChIP-ES-2i-CTCF-IP-Blobel-Rep2-S1_S9_MACS2_rendition_1E-8_downsampled_try3_peak_1342	763	11.5809	76.3	73.082	146
chr1	85116849	85117151	Project004-IPSHOCH-Exp5-ChIP-ES-2i-CTCF-IP-Blobel-Rep2-S1_S9_MACS2_rendition_1E-8_downsampled_try3_peak_1343	327	15.3106	32.7313	30.0878	169
chr1	85283760	85284057	Project004-IPSHOCH-Exp5-ChIP-ES-2i-CTCF-IP-Blobel-Rep2-S1_S9_MACS2_rendition_1E-8_downsampled_try3_peak_1344	517	9.48	51.7359	48.8481	139
chr1	85319835	85320115	Project004-IPSHOCH-Exp5-ChIP-ES-2i-CTCF-IP-Blobel-Rep2-S1_S9_MACS2_rendition_1E-8_downsampled_try3_peak_1345	1268	20.8696	126.867	122.898	142
chr1	85338838	85339103	Project004-IPSHOCH-Exp5-ChIP-ES-2i-CTCF-IP-Blobel-Rep2-S1_S9_MACS2_rendition_1E-8_downsampled_try3_peak_1346	679	12.6699	67.9917	64.8881	145
chr1	87348472	87348624	Project004-IPSHOCH-Exp5-ChIP-ES-2i-CTCF-IP-Blobel-Rep2-S1_S9_MACS2_rendition_1E-8_downsampled_try3_peak_1347	239	12.1429	23.9023	21.3845	32
chr1	87478108	87478385	Project004-IPSHOCH-Exp5-ChIP-ES-2i-CTCF-IP-Blobel-Rep2-S1_S9_MACS2_rendition_1E-8_downsampled_try3_peak_1348	364	12.8125	36.4172	33.7228	142
chr1	87550411	87550570	Project004-IPSHOCH-Exp5-ChIP-ES-2i-CTCF-IP-Blobel-Rep2-S1_S9_MACS2_rendition_1E-8_downsampled_try3_peak_1349	253	12.6708	25.3317	22.7939	41
chr1	87633104	87633434	Project004-IPSHOCH-Exp5-ChIP-ES-2i-CTCF-IP-Blobel-Rep2-S1_S9_MACS2_rendition_1E-8_downsampled_try3_peak_1350	872	27.338	87.2173	83.8483	181
chr1	87689752	87690127	Project004-IPSHOCH-Exp5-ChIP-ES-2i-CTCF-IP-Blobel-Rep2-S1_S9_MACS2_rendition_1E-8_downsampled_try3_peak_1351	1448	35	144.891	140.644	157
chr1	87716363	87716585	Project004-IPSHOCH-Exp5-ChIP-ES-2i-CTCF-IP-Blobel-Rep2-S1_S9_MACS2_rendition_1E-8_downsampled_try3_peak_1352	216	10.1351	21.6442	19.1618	131
chr1	87738857	87739199	Project004-IPSHOCH-Exp5-ChIP-ES-2i-CTCF-IP-Blobel-Rep2-S1_S9_MACS2_rendition_1E-8_downsampled_try3_peak_1353	593	22.6986	59.3051	56.3181	200
chr1	87749831	87750255	Project004-IPSHOCH-Exp5-ChIP-ES-2i-CTCF-IP-Blobel-Rep2-S1_S9_MACS2_rendition_1E-8_downsampled_try3_peak_1354	2178	47.8125	217.861	212.655	260
chr1	87751081	87751260	Project004-IPSHOCH-Exp5-ChIP-ES-2i-CTCF-IP-Blobel-Rep2-S1_S9_MACS2_rendition_1E-8_downsampled_try3_peak_1355	175	7.8125	17.5473	15.135	102
chr1	87792098	87792409	Project004-IPSHOCH-Exp5-ChIP-ES-2i-CTCF-IP-Blobel-Rep2-S1_S9_MACS2_rendition_1E-8_downsampled_try3_peak_1356	339	10.9322	33.9286	31.27	181
chr1	87796175	87796356	Project004-IPSHOCH-Exp5-ChIP-ES-2i-CTCF-IP-Blobel-Rep2-S1_S9_MACS2_rendition_1E-8_downsampled_try3_peak_1357	134	7.2973	13.4146	11.0861	67
chr1	87831986	87832411	Project004-IPSHOCH-Exp5-ChIP-ES-2i-CTCF-IP-Blobel-Rep2-S1_S9_MACS2_rendition_1E-8_downsampled_try3_peak_1358	1110	28.4888	111.02	107.301	203
chr1	87904433	87904780	Project004-IPSHOCH-Exp5-ChIP-ES-2i-CTCF-IP-Blobel-Rep2-S1_S9_MACS2_rendition_1E-8_downsampled_try3_peak_1359	1034	27.1875	103.477	99.8674	174
chr1	87914827	87915087	Project004-IPSHOCH-Exp5-ChIP-ES-2i-CTCF-IP-Blobel-Rep2-S1_S9_MACS2_rendition_1E-8_downsampled_try3_peak_1360	117	5.14286	11.7742	9.48986	133
chr1	87918266	87918518	Project004-IPSHOCH-Exp5-ChIP-ES-2i-CTCF-IP-Blobel-Rep2-S1_S9_MACS2_rendition_1E-8_downsampled_try3_peak_1361	658	17.2881	65.8689	62.7948	128
chr1	87956046	87956428	Project004-IPSHOCH-Exp5-ChIP-ES-2i-CTCF-IP-Blobel-Rep2-S1_S9_MACS2_rendition_1E-8_downsampled_try3_peak_1362	1520	33.1955	152.009	147.654	151
chr1	87959090	87959383	Project004-IPSHOCH-Exp5-ChIP-ES-2i-CTCF-IP-Blobel-Rep2-S1_S9_MACS2_rendition_1E-8_downsampled_try3_peak_1363	873	27.973	87.3842	84.0101	147
chr1	87960733	87961072	Project004-IPSHOCH-Exp5-ChIP-ES-2i-CTCF-IP-Blobel-Rep2-S1_S9_MACS2_rendition_1E-8_downsampled_try3_peak_1364	1197	30.3125	119.714	115.857	166
chr1	87990401	87990571	Project004-IPSHOCH-Exp5-ChIP-ES-2i-CTCF-IP-Blobel-Rep2-S1_S9_MACS2_rendition_1E-8_downsampled_try3_peak_1365	176	9.59157	17.6484	15.234	63
chr1	87991040	87991192	Project004-IPSHOCH-Exp5-ChIP-ES-2i-CTCF-IP-Blobel-Rep2-S1_S9_MACS2_rendition_1E-8_downsampled_try3_peak_1366	177	9.64585	17.7381	15.3235	66
chr1	88040816	88041177	Project004-IPSHOCH-Exp5-ChIP-ES-2i-CTCF-IP-Blobel-Rep2-S1_S9_MACS2_rendition_1E-8_downsampled_try3_peak_1367	831	23.125	83.1228	79.8094	166
chr1	88046550	88046767	Project004-IPSHOCH-Exp5-ChIP-ES-2i-CTCF-IP-Blobel-Rep2-S1_S9_MACS2_rendition_1E-8_downsampled_try3_peak_1368	237	11.0175	23.7027	21.1918	124
chr1	88049202	88049539	Project004-IPSHOCH-Exp5-ChIP-ES-2i-CTCF-IP-Blobel-Rep2-S1_S9_MACS2_rendition_1E-8_downsampled_try3_peak_1369	510	16.25	51.0377	48.1559	156
chr1	88071252	88071438	Project004-IPSHOCH-Exp5-ChIP-ES-2i-CTCF-IP-Blobel-Rep2-S1_S9_MACS2_rendition_1E-8_downsampled_try3_peak_1370	185	8.62234	18.5049	16.0752	100
chr1	88075346	88075895	Project004-IPSHOCH-Exp5-ChIP-ES-2i-CTCF-IP-Blobel-Rep2-S1_S9_MACS2_rendition_1E-8_downsampled_try3_peak_1371	2393	44.7458	239.307	233.855	251
chr1	88085637	88085921	Project004-IPSHOCH-Exp5-ChIP-ES-2i-CTCF-IP-Blobel-Rep2-S1_S9_MACS2_rendition_1E-8_downsampled_try3_peak_1372	601	15.7726	60.1211	57.1228	150
chr1	88110723	88111143	Project004-IPSHOCH-Exp5-ChIP-ES-2i-CTCF-IP-Blobel-Rep2-S1_S9_MACS2_rendition_1E-8_downsampled_try3_peak_1373	1221	24.2143	122.164	118.267	166
chr1	88147403	88147586	Project004-IPSHOCH-Exp5-ChIP-ES-2i-CTCF-IP-Blobel-Rep2-S1_S9_MACS2_rendition_1E-8_downsampled_try3_peak_1374	357	15.9744	35.7981	33.1142	76
chr1	88206538	88206816	Project004-IPSHOCH-Exp5-ChIP-ES-2i-CTCF-IP-Blobel-Rep2-S1_S9_MACS2_rendition_1E-8_downsampled_try3_peak_1375	128	5.84746	12.8808	10.5685	102
chr1	88210333	88210668	Project004-IPSHOCH-Exp5-ChIP-ES-2i-CTCF-IP-Blobel-Rep2-S1_S9_MACS2_rendition_1E-8_downsampled_try3_peak_1376	693	23.5135	69.35	66.2263	183
chr1	88236021	88236444	Project004-IPSHOCH-Exp5-ChIP-ES-2i-CTCF-IP-Blobel-Rep2-S1_S9_MACS2_rendition_1E-8_downsampled_try3_peak_1377	979	32.3431	97.9374	94.4112	179
chr1	88243741	88243991	Project004-IPSHOCH-Exp5-ChIP-ES-2i-CTCF-IP-Blobel-Rep2-S1_S9_MACS2_rendition_1E-8_downsampled_try3_peak_1378	247	11.2813	24.7305	22.2019	101
chr1	88245418	88245693	Project004-IPSHOCH-Exp5-ChIP-ES-2i-CTCF-IP-Blobel-Rep2-S1_S9_MACS2_rendition_1E-8_downsampled_try3_peak_1379	255	11.4329	25.5808	23.0359	136
chr1	88260310	88260730	Project004-IPSHOCH-Exp5-ChIP-ES-2i-CTCF-IP-Blobel-Rep2-S1_S9_MACS2_rendition_1E-8_downsampled_try3_peak_1380	660	21.1966	66.0788	63.0022	235
chr1	88268520	88268864	Project004-IPSHOCH-Exp5-ChIP-ES-2i-CTCF-IP-Blobel-Rep2-S1_S9_MACS2_rendition_1E-8_downsampled_try3_peak_1381	1084	31.4371	108.486	104.801	181
chr1	88277632	88278015	Project004-IPSHOCH-Exp5-ChIP-ES-2i-CTCF-IP-Blobel-Rep2-S1_S9_MACS2_rendition_1E-8_downsampled_try3_peak_1382	1483	35.625	148.316	144.014	192
chr1	88285798	88286294	Project004-IPSHOCH-Exp5-ChIP-ES-2i-CTCF-IP-Blobel-Rep2-S1_S9_MACS2_rendition_1E-8_downsampled_try3_peak_1383	1321	23.3333	132.196	128.147	250
chr1	88289530	88289805	Project004-IPSHOCH-Exp5-ChIP-ES-2i-CTCF-IP-Blobel-Rep2-S1_S9_MACS2_rendition_1E-8_downsampled_try3_peak_1384	529	21.3469	52.9455	50.0399	135
chr1	88292505	88292849	Project004-IPSHOCH-Exp5-ChIP-ES-2i-CTCF-IP-Blobel-Rep2-S1_S9_MACS2_rendition_1E-8_downsampled_try3_peak_1385	743	28.5093	74.3692	71.1746	144
chr1	88297938	88298132	Project004-IPSHOCH-Exp5-ChIP-ES-2i-CTCF-IP-Blobel-Rep2-S1_S9_MACS2_rendition_1E-8_downsampled_try3_peak_1386	278	10.9766	27.8039	25.2314	108
chr1	88301440	88301885	Project004-IPSHOCH-Exp5-ChIP-ES-2i-CTCF-IP-Blobel-Rep2-S1_S9_MACS2_rendition_1E-8_downsampled_try3_peak_1387	1897	47.0636	189.781	184.912	180
chr1	88312162	88313332	Project004-IPSHOCH-Exp5-ChIP-ES-2i-CTCF-IP-Blobel-Rep2-S1_S9_MACS2_rendition_1E-8_downsampled_try3_peak_1388	1668	53.603	166.897	162.327	857
chr1	88318617	88318834	Project004-IPSHOCH-Exp5-ChIP-ES-2i-CTCF-IP-Blobel-Rep2-S1_S9_MACS2_rendition_1E-8_downsampled_try3_peak_1389	261	12.1287	26.1595	23.6094	94
chr1	88326538	88326939	Project004-IPSHOCH-Exp5-ChIP-ES-2i-CTCF-IP-Blobel-Rep2-S1_S9_MACS2_rendition_1E-8_downsampled_try3_peak_1390	1346	38.9189	134.659	130.569	171
chr1	88335208	88335362	Project004-IPSHOCH-Exp5-ChIP-ES-2i-CTCF-IP-Blobel-Rep2-S1_S9_MACS2_rendition_1E-8_downsampled_try3_peak_1391	144	6.875	14.4294	12.0842	67
chr1	88337049	88337435	Project004-IPSHOCH-Exp5-ChIP-ES-2i-CTCF-IP-Blobel-Rep2-S1_S9_MACS2_rendition_1E-8_downsampled_try3_peak_1392	1197	30.3125	119.714	115.857	214
chr1	88367893	88368267	Project004-IPSHOCH-Exp5-ChIP-ES-2i-CTCF-IP-Blobel-Rep2-S1_S9_MACS2_rendition_1E-8_downsampled_try3_peak_1393	925	28.1646	92.5659	89.1187	247
chr1	88381428	88381719	Project004-IPSHOCH-Exp5-ChIP-ES-2i-CTCF-IP-Blobel-Rep2-S1_S9_MACS2_rendition_1E-8_downsampled_try3_peak_1394	188	9.10137	18.8183	16.3832	203
chr1	88396530	88396850	Project004-IPSHOCH-Exp5-ChIP-ES-2i-CTCF-IP-Blobel-Rep2-S1_S9_MACS2_rendition_1E-8_downsampled_try3_peak_1395	784	19.5763	78.4324	75.1863	131
chr1	88397540	88397983	Project004-IPSHOCH-Exp5-ChIP-ES-2i-CTCF-IP-Blobel-Rep2-S1_S9_MACS2_rendition_1E-8_downsampled_try3_peak_1396	1279	35.1941	127.941	123.958	230
chr1	88398188	88398542	Project004-IPSHOCH-Exp5-ChIP-ES-2i-CTCF-IP-Blobel-Rep2-S1_S9_MACS2_rendition_1E-8_downsampled_try3_peak_1397	1635	43.0389	163.514	158.992	165
chr1	88400740	88401080	Project004-IPSHOCH-Exp5-ChIP-ES-2i-CTCF-IP-Blobel-Rep2-S1_S9_MACS2_rendition_1E-8_downsampled_try3_peak_1398	888	24.1536	88.8521	85.4624	144
chr1	88405935	88406347	Project004-IPSHOCH-Exp5-ChIP-ES-2i-CTCF-IP-Blobel-Rep2-S1_S9_MACS2_rendition_1E-8_downsampled_try3_peak_1399	1164	29.6875	116.429	112.625	196
chr1	88417042	88417231	Project004-IPSHOCH-Exp5-ChIP-ES-2i-CTCF-IP-Blobel-Rep2-S1_S9_MACS2_rendition_1E-8_downsampled_try3_peak_1400	219	9.0625	21.9387	19.4506	65
chr1	88421843	88422282	Project004-IPSHOCH-Exp5-ChIP-ES-2i-CTCF-IP-Blobel-Rep2-S1_S9_MACS2_rendition_1E-8_downsampled_try3_peak_1401	1224	30.6565	122.459	118.56	192
chr1	88424629	88425187	Project004-IPSHOCH-Exp5-ChIP-ES-2i-CTCF-IP-Blobel-Rep2-S1_S9_MACS2_rendition_1E-8_downsampled_try3_peak_1402	1045	27.2502	104.586	100.96	349
chr1	88425286	88425471	Project004-IPSHOCH-Exp5-ChIP-ES-2i-CTCF-IP-Blobel-Rep2-S1_S9_MACS2_rendition_1E-8_downsampled_try3_peak_1403	217	8.94929	21.7261	19.2424	103
chr1	88428998	88429286	Project004-IPSHOCH-Exp5-ChIP-ES-2i-CTCF-IP-Blobel-Rep2-S1_S9_MACS2_rendition_1E-8_downsampled_try3_peak_1404	874	17.4074	87.4421	84.0667	137
chr1	88430357	88430828	Project004-IPSHOCH-Exp5-ChIP-ES-2i-CTCF-IP-Blobel-Rep2-S1_S9_MACS2_rendition_1E-8_downsampled_try3_peak_1405	713	18.3051	71.3931	68.2405	143
chr1	88433471	88433628	Project004-IPSHOCH-Exp5-ChIP-ES-2i-CTCF-IP-Blobel-Rep2-S1_S9_MACS2_rendition_1E-8_downsampled_try3_peak_1406	188	9.14169	18.8869	16.451	101
chr1	88435052	88435331	Project004-IPSHOCH-Exp5-ChIP-ES-2i-CTCF-IP-Blobel-Rep2-S1_S9_MACS2_rendition_1E-8_downsampled_try3_peak_1407	508	13.0714	50.8509	47.9737	143
chr1	88436265	88436543	Project004-IPSHOCH-Exp5-ChIP-ES-2i-CTCF-IP-Blobel-Rep2-S1_S9_MACS2_rendition_1E-8_downsampled_try3_peak_1408	268	12.5692	26.8979	24.334	121
chr1	88495036	88495423	Project004-IPSHOCH-Exp5-ChIP-ES-2i-CTCF-IP-Blobel-Rep2-S1_S9_MACS2_rendition_1E-8_downsampled_try3_peak_1409	564	15.5085	56.4493	53.5005	243
chr1	88506093	88506287	Project004-IPSHOCH-Exp5-ChIP-ES-2i-CTCF-IP-Blobel-Rep2-S1_S9_MACS2_rendition_1E-8_downsampled_try3_peak_1410	213	10.2669	21.318	18.841	104
chr1	88508729	88509052	Project004-IPSHOCH-Exp5-ChIP-ES-2i-CTCF-IP-Blobel-Rep2-S1_S9_MACS2_rendition_1E-8_downsampled_try3_peak_1411	583	20.6757	58.3323	55.3559	142
chr1	88510913	88511145	Project004-IPSHOCH-Exp5-ChIP-ES-2i-CTCF-IP-Blobel-Rep2-S1_S9_MACS2_rendition_1E-8_downsampled_try3_peak_1412	373	16.8944	37.3519	34.6487	106
chr1	88512233	88512493	Project004-IPSHOCH-Exp5-ChIP-ES-2i-CTCF-IP-Blobel-Rep2-S1_S9_MACS2_rendition_1E-8_downsampled_try3_peak_1413	518	21.646	51.8962	49.0047	139
chr1	88515055	88515400	Project004-IPSHOCH-Exp5-ChIP-ES-2i-CTCF-IP-Blobel-Rep2-S1_S9_MACS2_rendition_1E-8_downsampled_try3_peak_1414	770	19.322	77.013	73.7877	151
chr1	88517236	88517558	Project004-IPSHOCH-Exp5-ChIP-ES-2i-CTCF-IP-Blobel-Rep2-S1_S9_MACS2_rendition_1E-8_downsampled_try3_peak_1415	560	21.7528	56.0456	53.0998	192
chr1	88546849	88547238	Project004-IPSHOCH-Exp5-ChIP-ES-2i-CTCF-IP-Blobel-Rep2-S1_S9_MACS2_rendition_1E-8_downsampled_try3_peak_1416	1311	25.5	131.177	127.14	174
chr1	88549308	88549551	Project004-IPSHOCH-Exp5-ChIP-ES-2i-CTCF-IP-Blobel-Rep2-S1_S9_MACS2_rendition_1E-8_downsampled_try3_peak_1417	528	20.8071	52.8234	49.9182	110
chr1	88566073	88566377	Project004-IPSHOCH-Exp5-ChIP-ES-2i-CTCF-IP-Blobel-Rep2-S1_S9_MACS2_rendition_1E-8_downsampled_try3_peak_1418	767	20.8559	76.7883	73.5668	157
chr1	88593532	88593844	Project004-IPSHOCH-Exp5-ChIP-ES-2i-CTCF-IP-Blobel-Rep2-S1_S9_MACS2_rendition_1E-8_downsampled_try3_peak_1419	752	27.9553	75.2021	72.0032	190
chr1	88595455	88595649	Project004-IPSHOCH-Exp5-ChIP-ES-2i-CTCF-IP-Blobel-Rep2-S1_S9_MACS2_rendition_1E-8_downsampled_try3_peak_1420	464	17.9672	46.4092	43.5888	88
chr1	88596364	88596642	Project004-IPSHOCH-Exp5-ChIP-ES-2i-CTCF-IP-Blobel-Rep2-S1_S9_MACS2_rendition_1E-8_downsampled_try3_peak_1421	709	26.0088	70.9861	67.841	142
chr1	88759568	88759825	Project004-IPSHOCH-Exp5-ChIP-ES-2i-CTCF-IP-Blobel-Rep2-S1_S9_MACS2_rendition_1E-8_downsampled_try3_peak_1422	197	8.4375	19.7116	17.2628	146
chr1	88811398	88811593	Project004-IPSHOCH-Exp5-ChIP-ES-2i-CTCF-IP-Blobel-Rep2-S1_S9_MACS2_rendition_1E-8_downsampled_try3_peak_1423	293	12.5676	29.3754	26.7781	84
chr1	88864960	88865158	Project004-IPSHOCH-Exp5-ChIP-ES-2i-CTCF-IP-Blobel-Rep2-S1_S9_MACS2_rendition_1E-8_downsampled_try3_peak_1424	334	13.7838	33.4333	30.7802	103
chr1	88869325	88869570	Project004-IPSHOCH-Exp5-ChIP-ES-2i-CTCF-IP-Blobel-Rep2-S1_S9_MACS2_rendition_1E-8_downsampled_try3_peak_1425	327	15.3106	32.7313	30.0878	132
chr1	88937735	88938059	Project004-IPSHOCH-Exp5-ChIP-ES-2i-CTCF-IP-Blobel-Rep2-S1_S9_MACS2_rendition_1E-8_downsampled_try3_peak_1426	681	20	68.1289	65.0212	142
chr1	88938626	88939002	Project004-IPSHOCH-Exp5-ChIP-ES-2i-CTCF-IP-Blobel-Rep2-S1_S9_MACS2_rendition_1E-8_downsampled_try3_peak_1427	812	20.0847	81.2878	78.0024	235
chr1	88957555	88957823	Project004-IPSHOCH-Exp5-ChIP-ES-2i-CTCF-IP-Blobel-Rep2-S1_S9_MACS2_rendition_1E-8_downsampled_try3_peak_1428	351	12.5	35.1463	32.4703	145
chr1	88967305	88967715	Project004-IPSHOCH-Exp5-ChIP-ES-2i-CTCF-IP-Blobel-Rep2-S1_S9_MACS2_rendition_1E-8_downsampled_try3_peak_1429	1292	37.7027	129.225	125.218	186
chr1	88983586	88983852	Project004-IPSHOCH-Exp5-ChIP-ES-2i-CTCF-IP-Blobel-Rep2-S1_S9_MACS2_rendition_1E-8_downsampled_try3_peak_1430	528	20.8071	52.8234	49.9182	131
chr1	88995146	88995590	Project004-IPSHOCH-Exp5-ChIP-ES-2i-CTCF-IP-Blobel-Rep2-S1_S9_MACS2_rendition_1E-8_downsampled_try3_peak_1431	1347	33.125	134.709	130.615	201
chr1	89008354	89008578	Project004-IPSHOCH-Exp5-ChIP-ES-2i-CTCF-IP-Blobel-Rep2-S1_S9_MACS2_rendition_1E-8_downsampled_try3_peak_1432	638	18.2489	63.8025	60.7555	118
chr1	89070752	89071254	Project004-IPSHOCH-Exp5-ChIP-ES-2i-CTCF-IP-Blobel-Rep2-S1_S9_MACS2_rendition_1E-8_downsampled_try3_peak_1433	1500	35.9375	150.035	145.707	274
chr1	89072386	89072644	Project004-IPSHOCH-Exp5-ChIP-ES-2i-CTCF-IP-Blobel-Rep2-S1_S9_MACS2_rendition_1E-8_downsampled_try3_peak_1434	460	12.2143	46.0084	43.1942	119
chr1	89081118	89081828	Project004-IPSHOCH-Exp5-ChIP-ES-2i-CTCF-IP-Blobel-Rep2-S1_S9_MACS2_rendition_1E-8_downsampled_try3_peak_1435	540	20.1061	54.044	51.1215	422
chr1	89082078	89082239	Project004-IPSHOCH-Exp5-ChIP-ES-2i-CTCF-IP-Blobel-Rep2-S1_S9_MACS2_rendition_1E-8_downsampled_try3_peak_1436	140	7.91395	14.0015	11.6637	124
chr1	89083516	89083959	Project004-IPSHOCH-Exp5-ChIP-ES-2i-CTCF-IP-Blobel-Rep2-S1_S9_MACS2_rendition_1E-8_downsampled_try3_peak_1437	1185	19.8913	118.537	114.699	269
chr1	89088502	89088732	Project004-IPSHOCH-Exp5-ChIP-ES-2i-CTCF-IP-Blobel-Rep2-S1_S9_MACS2_rendition_1E-8_downsampled_try3_peak_1438	281	12.2496	28.1996	25.62	95
chr1	89102972	89103255	Project004-IPSHOCH-Exp5-ChIP-ES-2i-CTCF-IP-Blobel-Rep2-S1_S9_MACS2_rendition_1E-8_downsampled_try3_peak_1439	538	15	53.8199	50.8997	133
chr1	89105543	89105742	Project004-IPSHOCH-Exp5-ChIP-ES-2i-CTCF-IP-Blobel-Rep2-S1_S9_MACS2_rendition_1E-8_downsampled_try3_peak_1440	242	9.6875	24.2245	21.699	142
chr1	89114562	89114901	Project004-IPSHOCH-Exp5-ChIP-ES-2i-CTCF-IP-Blobel-Rep2-S1_S9_MACS2_rendition_1E-8_downsampled_try3_peak_1441	1003	27.6078	100.356	96.7939	194
chr1	89142542	89143134	Project004-IPSHOCH-Exp5-ChIP-ES-2i-CTCF-IP-Blobel-Rep2-S1_S9_MACS2_rendition_1E-8_downsampled_try3_peak_1442	1359	29.2373	135.982	131.874	388
chr1	89178903	89179613	Project004-IPSHOCH-Exp5-ChIP-ES-2i-CTCF-IP-Blobel-Rep2-S1_S9_MACS2_rendition_1E-8_downsampled_try3_peak_1443	1196	37.7336	119.609	115.758	308
chr1	89189474	89189768	Project004-IPSHOCH-Exp5-ChIP-ES-2i-CTCF-IP-Blobel-Rep2-S1_S9_MACS2_rendition_1E-8_downsampled_try3_peak_1444	753	27.0005	75.3823	72.1812	163
chr1	89212057	89212317	Project004-IPSHOCH-Exp5-ChIP-ES-2i-CTCF-IP-Blobel-Rep2-S1_S9_MACS2_rendition_1E-8_downsampled_try3_peak_1445	277	10.625	27.7551	25.1828	140
chr1	89223752	89223978	Project004-IPSHOCH-Exp5-ChIP-ES-2i-CTCF-IP-Blobel-Rep2-S1_S9_MACS2_rendition_1E-8_downsampled_try3_peak_1446	332	12.1878	33.2299	30.5816	92
chr1	89261524	89261713	Project004-IPSHOCH-Exp5-ChIP-ES-2i-CTCF-IP-Blobel-Rep2-S1_S9_MACS2_rendition_1E-8_downsampled_try3_peak_1447	186	8.125	18.6213	16.1884	90
chr1	89276560	89276849	Project004-IPSHOCH-Exp5-ChIP-ES-2i-CTCF-IP-Blobel-Rep2-S1_S9_MACS2_rendition_1E-8_downsampled_try3_peak_1448	580	17.8125	58.0283	55.0577	134
chr1	89315252	89315648	Project004-IPSHOCH-Exp5-ChIP-ES-2i-CTCF-IP-Blobel-Rep2-S1_S9_MACS2_rendition_1E-8_downsampled_try3_peak_1449	566	17.5	56.6146	53.6626	193
chr1	89343897	89344408	Project004-IPSHOCH-Exp5-ChIP-ES-2i-CTCF-IP-Blobel-Rep2-S1_S9_MACS2_rendition_1E-8_downsampled_try3_peak_1450	988	23.1356	98.861	95.3202	323
chr1	89400607	89400764	Project004-IPSHOCH-Exp5-ChIP-ES-2i-CTCF-IP-Blobel-Rep2-S1_S9_MACS2_rendition_1E-8_downsampled_try3_peak_1451	185	9.8201	18.5018	16.0726	87
chr1	89404335	89404563	Project004-IPSHOCH-Exp5-ChIP-ES-2i-CTCF-IP-Blobel-Rep2-S1_S9_MACS2_rendition_1E-8_downsampled_try3_peak_1452	215	10.7071	21.5103	19.0314	115
chr1	89438217	89438526	Project004-IPSHOCH-Exp5-ChIP-ES-2i-CTCF-IP-Blobel-Rep2-S1_S9_MACS2_rendition_1E-8_downsampled_try3_peak_1453	630	13.8889	63.0207	59.9847	145
chr1	89464997	89465396	Project004-IPSHOCH-Exp5-ChIP-ES-2i-CTCF-IP-Blobel-Rep2-S1_S9_MACS2_rendition_1E-8_downsampled_try3_peak_1454	1079	32.8378	107.919	104.241	146
chr1	89504953	89505398	Project004-IPSHOCH-Exp5-ChIP-ES-2i-CTCF-IP-Blobel-Rep2-S1_S9_MACS2_rendition_1E-8_downsampled_try3_peak_1455	1263	31.5625	126.336	122.376	239
chr1	89560630	89560981	Project004-IPSHOCH-Exp5-ChIP-ES-2i-CTCF-IP-Blobel-Rep2-S1_S9_MACS2_rendition_1E-8_downsampled_try3_peak_1456	939	25.3125	93.9706	90.5041	163
chr1	89563714	89563871	Project004-IPSHOCH-Exp5-ChIP-ES-2i-CTCF-IP-Blobel-Rep2-S1_S9_MACS2_rendition_1E-8_downsampled_try3_peak_1457	140	7.42033	14.0555	11.7168	71
chr1	89593001	89593327	Project004-IPSHOCH-Exp5-ChIP-ES-2i-CTCF-IP-Blobel-Rep2-S1_S9_MACS2_rendition_1E-8_downsampled_try3_peak_1458	897	32.1277	89.7493	86.3426	95
chr1	89618087	89618271	Project004-IPSHOCH-Exp5-ChIP-ES-2i-CTCF-IP-Blobel-Rep2-S1_S9_MACS2_rendition_1E-8_downsampled_try3_peak_1459	254	12.411	25.4593	22.9156	123
chr1	89652365	89652588	Project004-IPSHOCH-Exp5-ChIP-ES-2i-CTCF-IP-Blobel-Rep2-S1_S9_MACS2_rendition_1E-8_downsampled_try3_peak_1460	402	13.75	40.2917	37.5523	130
chr1	89662710	89663192	Project004-IPSHOCH-Exp5-ChIP-ES-2i-CTCF-IP-Blobel-Rep2-S1_S9_MACS2_rendition_1E-8_downsampled_try3_peak_1461	820	28.1592	82.0006	78.7043	325
chr1	89707076	89707293	Project004-IPSHOCH-Exp5-ChIP-ES-2i-CTCF-IP-Blobel-Rep2-S1_S9_MACS2_rendition_1E-8_downsampled_try3_peak_1462	334	13.7838	33.4333	30.7802	104
chr1	89721866	89722214	Project004-IPSHOCH-Exp5-ChIP-ES-2i-CTCF-IP-Blobel-Rep2-S1_S9_MACS2_rendition_1E-8_downsampled_try3_peak_1463	132	7.91925	13.209	10.8855	94
chr1	89782870	89783048	Project004-IPSHOCH-Exp5-ChIP-ES-2i-CTCF-IP-Blobel-Rep2-S1_S9_MACS2_rendition_1E-8_downsampled_try3_peak_1464	132	7.91925	13.209	10.8855	129
chr1	89803211	89803404	Project004-IPSHOCH-Exp5-ChIP-ES-2i-CTCF-IP-Blobel-Rep2-S1_S9_MACS2_rendition_1E-8_downsampled_try3_peak_1465	293	12.5676	29.3754	26.7781	59
chr1	89819330	89819539	Project004-IPSHOCH-Exp5-ChIP-ES-2i-CTCF-IP-Blobel-Rep2-S1_S9_MACS2_rendition_1E-8_downsampled_try3_peak_1466	268	11.8413	26.8828	24.3194	101
chr1	89833133	89833412	Project004-IPSHOCH-Exp5-ChIP-ES-2i-CTCF-IP-Blobel-Rep2-S1_S9_MACS2_rendition_1E-8_downsampled_try3_peak_1467	576	22.7105	57.6735	54.7079	148
chr1	89860197	89860474	Project004-IPSHOCH-Exp5-ChIP-ES-2i-CTCF-IP-Blobel-Rep2-S1_S9_MACS2_rendition_1E-8_downsampled_try3_peak_1468	480	19.3884	48.0639	45.2221	151
chr1	89982199	89982535	Project004-IPSHOCH-Exp5-ChIP-ES-2i-CTCF-IP-Blobel-Rep2-S1_S9_MACS2_rendition_1E-8_downsampled_try3_peak_1469	614	21.4865	61.4404	58.4249	160
chr1	90016960	90017496	Project004-IPSHOCH-Exp5-ChIP-ES-2i-CTCF-IP-Blobel-Rep2-S1_S9_MACS2_rendition_1E-8_downsampled_try3_peak_1470	955	25.625	95.5421	92.0523	365
chr1	90018145	90018368	Project004-IPSHOCH-Exp5-ChIP-ES-2i-CTCF-IP-Blobel-Rep2-S1_S9_MACS2_rendition_1E-8_downsampled_try3_peak_1471	404	15.8108	40.4434	37.6984	122
chr1	90040617	90041216	Project004-IPSHOCH-Exp5-ChIP-ES-2i-CTCF-IP-Blobel-Rep2-S1_S9_MACS2_rendition_1E-8_downsampled_try3_peak_1472	1186	26.4407	118.669	114.828	454
chr1	90041861	90042182	Project004-IPSHOCH-Exp5-ChIP-ES-2i-CTCF-IP-Blobel-Rep2-S1_S9_MACS2_rendition_1E-8_downsampled_try3_peak_1473	586	23.7578	58.6448	55.6626	134
chr1	90046741	90046909	Project004-IPSHOCH-Exp5-ChIP-ES-2i-CTCF-IP-Blobel-Rep2-S1_S9_MACS2_rendition_1E-8_downsampled_try3_peak_1474	214	10.9824	21.4366	18.9583	99
chr1	90113761	90114086	Project004-IPSHOCH-Exp5-ChIP-ES-2i-CTCF-IP-Blobel-Rep2-S1_S9_MACS2_rendition_1E-8_downsampled_try3_peak_1475	652	19.375	65.2077	62.1405	183
chr1	90114722	90114892	Project004-IPSHOCH-Exp5-ChIP-ES-2i-CTCF-IP-Blobel-Rep2-S1_S9_MACS2_rendition_1E-8_downsampled_try3_peak_1476	125	5	12.5009	10.1931	101
chr1	90174061	90174552	Project004-IPSHOCH-Exp5-ChIP-ES-2i-CTCF-IP-Blobel-Rep2-S1_S9_MACS2_rendition_1E-8_downsampled_try3_peak_1477	2040	27.233	204.001	198.963	226
chr1	90181448	90181909	Project004-IPSHOCH-Exp5-ChIP-ES-2i-CTCF-IP-Blobel-Rep2-S1_S9_MACS2_rendition_1E-8_downsampled_try3_peak_1478	1539	17.6531	153.971	149.585	191
chr1	90184128	90184618	Project004-IPSHOCH-Exp5-ChIP-ES-2i-CTCF-IP-Blobel-Rep2-S1_S9_MACS2_rendition_1E-8_downsampled_try3_peak_1479	1365	23.8889	136.587	132.465	255
chr1	90186488	90186989	Project004-IPSHOCH-Exp5-ChIP-ES-2i-CTCF-IP-Blobel-Rep2-S1_S9_MACS2_rendition_1E-8_downsampled_try3_peak_1480	2108	36.2143	210.851	205.728	174
chr1	90198213	90198560	Project004-IPSHOCH-Exp5-ChIP-ES-2i-CTCF-IP-Blobel-Rep2-S1_S9_MACS2_rendition_1E-8_downsampled_try3_peak_1481	875	19.0714	87.5719	84.1954	204
chr1	90215199	90215428	Project004-IPSHOCH-Exp5-ChIP-ES-2i-CTCF-IP-Blobel-Rep2-S1_S9_MACS2_rendition_1E-8_downsampled_try3_peak_1482	502	21.118	50.2346	47.3624	110
chr1	90254052	90254436	Project004-IPSHOCH-Exp5-ChIP-ES-2i-CTCF-IP-Blobel-Rep2-S1_S9_MACS2_rendition_1E-8_downsampled_try3_peak_1483	1044	32.027	104.44	100.817	129
chr1	90263991	90264145	Project004-IPSHOCH-Exp5-ChIP-ES-2i-CTCF-IP-Blobel-Rep2-S1_S9_MACS2_rendition_1E-8_downsampled_try3_peak_1484	197	10.559	19.7277	17.2736	82
chr1	90321183	90321619	Project004-IPSHOCH-Exp5-ChIP-ES-2i-CTCF-IP-Blobel-Rep2-S1_S9_MACS2_rendition_1E-8_downsampled_try3_peak_1485	1061	32.4324	106.177	102.528	198
chr1	90330690	90330953	Project004-IPSHOCH-Exp5-ChIP-ES-2i-CTCF-IP-Blobel-Rep2-S1_S9_MACS2_rendition_1E-8_downsampled_try3_peak_1486	269	7.96296	26.9779	24.4137	87
chr1	90341859	90342362	Project004-IPSHOCH-Exp5-ChIP-ES-2i-CTCF-IP-Blobel-Rep2-S1_S9_MACS2_rendition_1E-8_downsampled_try3_peak_1487	676	25.0631	67.6073	64.5097	303
chr1	90353208	90353600	Project004-IPSHOCH-Exp5-ChIP-ES-2i-CTCF-IP-Blobel-Rep2-S1_S9_MACS2_rendition_1E-8_downsampled_try3_peak_1488	1249	27.4576	124.909	120.974	234
chr1	90362398	90362564	Project004-IPSHOCH-Exp5-ChIP-ES-2i-CTCF-IP-Blobel-Rep2-S1_S9_MACS2_rendition_1E-8_downsampled_try3_peak_1489	185	8.62234	18.5049	16.0752	98
chr1	90370581	90370807	Project004-IPSHOCH-Exp5-ChIP-ES-2i-CTCF-IP-Blobel-Rep2-S1_S9_MACS2_rendition_1E-8_downsampled_try3_peak_1490	281	12.2496	28.1996	25.62	72
chr1	90407593	90407790	Project004-IPSHOCH-Exp5-ChIP-ES-2i-CTCF-IP-Blobel-Rep2-S1_S9_MACS2_rendition_1E-8_downsampled_try3_peak_1491	145	7.7027	14.5288	12.1727	96
chr1	90458952	90459335	Project004-IPSHOCH-Exp5-ChIP-ES-2i-CTCF-IP-Blobel-Rep2-S1_S9_MACS2_rendition_1E-8_downsampled_try3_peak_1492	840	27.1622	84.0452	80.719	177
chr1	90601746	90602122	Project004-IPSHOCH-Exp5-ChIP-ES-2i-CTCF-IP-Blobel-Rep2-S1_S9_MACS2_rendition_1E-8_downsampled_try3_peak_1493	728	24.4991	72.8737	69.6998	200
chr1	90602406	90602779	Project004-IPSHOCH-Exp5-ChIP-ES-2i-CTCF-IP-Blobel-Rep2-S1_S9_MACS2_rendition_1E-8_downsampled_try3_peak_1494	1465	40.6165	146.584	142.312	203
chr1	90614434	90614615	Project004-IPSHOCH-Exp5-ChIP-ES-2i-CTCF-IP-Blobel-Rep2-S1_S9_MACS2_rendition_1E-8_downsampled_try3_peak_1495	265	10.3125	26.5652	24.0109	84
chr1	90617522	90617870	Project004-IPSHOCH-Exp5-ChIP-ES-2i-CTCF-IP-Blobel-Rep2-S1_S9_MACS2_rendition_1E-8_downsampled_try3_peak_1496	522	19.0541	52.2186	49.3222	161
chr1	90639042	90639321	Project004-IPSHOCH-Exp5-ChIP-ES-2i-CTCF-IP-Blobel-Rep2-S1_S9_MACS2_rendition_1E-8_downsampled_try3_peak_1497	482	15.625	48.2983	45.4524	138
chr1	90641663	90642222	Project004-IPSHOCH-Exp5-ChIP-ES-2i-CTCF-IP-Blobel-Rep2-S1_S9_MACS2_rendition_1E-8_downsampled_try3_peak_1498	1226	39.5143	122.68	118.78	331
chr1	90646759	90647051	Project004-IPSHOCH-Exp5-ChIP-ES-2i-CTCF-IP-Blobel-Rep2-S1_S9_MACS2_rendition_1E-8_downsampled_try3_peak_1499	707	20.4377	70.7098	67.5734	122
chr1	90648843	90649098	Project004-IPSHOCH-Exp5-ChIP-ES-2i-CTCF-IP-Blobel-Rep2-S1_S9_MACS2_rendition_1E-8_downsampled_try3_peak_1500	166	6.86441	16.6443	14.252	144
chr1	90653203	90653496	Project004-IPSHOCH-Exp5-ChIP-ES-2i-CTCF-IP-Blobel-Rep2-S1_S9_MACS2_rendition_1E-8_downsampled_try3_peak_1501	455	15	45.5931	42.7806	139
chr1	90657394	90657574	Project004-IPSHOCH-Exp5-ChIP-ES-2i-CTCF-IP-Blobel-Rep2-S1_S9_MACS2_rendition_1E-8_downsampled_try3_peak_1502	166	5.92593	16.6787	14.2854	51
chr1	90673634	90673958	Project004-IPSHOCH-Exp5-ChIP-ES-2i-CTCF-IP-Blobel-Rep2-S1_S9_MACS2_rendition_1E-8_downsampled_try3_peak_1503	808	29.1413	80.8803	77.5986	170
chr1	90703579	90703885	Project004-IPSHOCH-Exp5-ChIP-ES-2i-CTCF-IP-Blobel-Rep2-S1_S9_MACS2_rendition_1E-8_downsampled_try3_peak_1504	831	27.1966	83.1587	79.8452	151
chr1	90712662	90712923	Project004-IPSHOCH-Exp5-ChIP-ES-2i-CTCF-IP-Blobel-Rep2-S1_S9_MACS2_rendition_1E-8_downsampled_try3_peak_1505	302	12.3503	30.2762	27.6669	74
chr1	90797053	90797257	Project004-IPSHOCH-Exp5-ChIP-ES-2i-CTCF-IP-Blobel-Rep2-S1_S9_MACS2_rendition_1E-8_downsampled_try3_peak_1506	239	12.1429	23.9023	21.3845	134
chr1	90860418	90860612	Project004-IPSHOCH-Exp5-ChIP-ES-2i-CTCF-IP-Blobel-Rep2-S1_S9_MACS2_rendition_1E-8_downsampled_try3_peak_1507	209	10.9716	20.9068	18.437	88
chr1	90903325	90903563	Project004-IPSHOCH-Exp5-ChIP-ES-2i-CTCF-IP-Blobel-Rep2-S1_S9_MACS2_rendition_1E-8_downsampled_try3_peak_1508	239	12.1429	23.9023	21.3845	136
chr1	90954652	90954929	Project004-IPSHOCH-Exp5-ChIP-ES-2i-CTCF-IP-Blobel-Rep2-S1_S9_MACS2_rendition_1E-8_downsampled_try3_peak_1509	525	14.7458	52.516	49.6135	142
chr1	91023792	91024065	Project004-IPSHOCH-Exp5-ChIP-ES-2i-CTCF-IP-Blobel-Rep2-S1_S9_MACS2_rendition_1E-8_downsampled_try3_peak_1510	514	17.2716	51.4099	48.5235	123
chr1	91071889	91072256	Project004-IPSHOCH-Exp5-ChIP-ES-2i-CTCF-IP-Blobel-Rep2-S1_S9_MACS2_rendition_1E-8_downsampled_try3_peak_1511	785	22.1875	78.5596	75.3095	225
chr1	91088017	91088553	Project004-IPSHOCH-Exp5-ChIP-ES-2i-CTCF-IP-Blobel-Rep2-S1_S9_MACS2_rendition_1E-8_downsampled_try3_peak_1512	1363	37.4252	136.365	132.253	306
chr1	91089392	91089780	Project004-IPSHOCH-Exp5-ChIP-ES-2i-CTCF-IP-Blobel-Rep2-S1_S9_MACS2_rendition_1E-8_downsampled_try3_peak_1513	787	25.7804	78.7935	75.5415	230
chr1	91092739	91093072	Project004-IPSHOCH-Exp5-ChIP-ES-2i-CTCF-IP-Blobel-Rep2-S1_S9_MACS2_rendition_1E-8_downsampled_try3_peak_1514	706	21.7622	70.6187	67.4832	107
chr1	91103982	91104215	Project004-IPSHOCH-Exp5-ChIP-ES-2i-CTCF-IP-Blobel-Rep2-S1_S9_MACS2_rendition_1E-8_downsampled_try3_peak_1515	348	14.1892	34.8116	32.1402	117
chr1	91131955	91132157	Project004-IPSHOCH-Exp5-ChIP-ES-2i-CTCF-IP-Blobel-Rep2-S1_S9_MACS2_rendition_1E-8_downsampled_try3_peak_1516	205	9.79965	20.53	18.0663	99
chr1	91173169	91173421	Project004-IPSHOCH-Exp5-ChIP-ES-2i-CTCF-IP-Blobel-Rep2-S1_S9_MACS2_rendition_1E-8_downsampled_try3_peak_1517	140	7.70021	14.0818	11.7423	148
chr1	91219677	91219983	Project004-IPSHOCH-Exp5-ChIP-ES-2i-CTCF-IP-Blobel-Rep2-S1_S9_MACS2_rendition_1E-8_downsampled_try3_peak_1518	693	23.5135	69.35	66.2263	181
chr1	91239434	91239745	Project004-IPSHOCH-Exp5-ChIP-ES-2i-CTCF-IP-Blobel-Rep2-S1_S9_MACS2_rendition_1E-8_downsampled_try3_peak_1519	1038	36.9565	103.864	100.249	155
chr1	91241127	91241454	Project004-IPSHOCH-Exp5-ChIP-ES-2i-CTCF-IP-Blobel-Rep2-S1_S9_MACS2_rendition_1E-8_downsampled_try3_peak_1520	1263	31.5625	126.336	122.376	184
chr1	91261687	91261839	Project004-IPSHOCH-Exp5-ChIP-ES-2i-CTCF-IP-Blobel-Rep2-S1_S9_MACS2_rendition_1E-8_downsampled_try3_peak_1521	105	5.625	10.5451	8.29124	6
chr1	91265399	91265644	Project004-IPSHOCH-Exp5-ChIP-ES-2i-CTCF-IP-Blobel-Rep2-S1_S9_MACS2_rendition_1E-8_downsampled_try3_peak_1522	404	17.9503	40.4998	37.7504	126
chr1	91298328	91298485	Project004-IPSHOCH-Exp5-ChIP-ES-2i-CTCF-IP-Blobel-Rep2-S1_S9_MACS2_rendition_1E-8_downsampled_try3_peak_1523	157	8.97516	15.7436	13.3619	47
chr1	91421034	91421322	Project004-IPSHOCH-Exp5-ChIP-ES-2i-CTCF-IP-Blobel-Rep2-S1_S9_MACS2_rendition_1E-8_downsampled_try3_peak_1524	987	26.25	98.7009	95.1647	142
chr1	91422562	91422740	Project004-IPSHOCH-Exp5-ChIP-ES-2i-CTCF-IP-Blobel-Rep2-S1_S9_MACS2_rendition_1E-8_downsampled_try3_peak_1525	253	10	25.3882	22.8479	113
chr1	91477889	91478130	Project004-IPSHOCH-Exp5-ChIP-ES-2i-CTCF-IP-Blobel-Rep2-S1_S9_MACS2_rendition_1E-8_downsampled_try3_peak_1526	304	10.1695	30.4589	27.8476	142
chr1	91480051	91480219	Project004-IPSHOCH-Exp5-ChIP-ES-2i-CTCF-IP-Blobel-Rep2-S1_S9_MACS2_rendition_1E-8_downsampled_try3_peak_1527	216	10.1351	21.6442	19.1618	87
chr1	91503164	91503504	Project004-IPSHOCH-Exp5-ChIP-ES-2i-CTCF-IP-Blobel-Rep2-S1_S9_MACS2_rendition_1E-8_downsampled_try3_peak_1528	1027	31.6216	102.709	99.1105	194
chr1	91509172	91509370	Project004-IPSHOCH-Exp5-ChIP-ES-2i-CTCF-IP-Blobel-Rep2-S1_S9_MACS2_rendition_1E-8_downsampled_try3_peak_1529	132	7.91925	13.209	10.8855	122
chr1	91524266	91524629	Project004-IPSHOCH-Exp5-ChIP-ES-2i-CTCF-IP-Blobel-Rep2-S1_S9_MACS2_rendition_1E-8_downsampled_try3_peak_1530	779	29.5652	77.9552	74.7149	178
chr1	91528401	91528719	Project004-IPSHOCH-Exp5-ChIP-ES-2i-CTCF-IP-Blobel-Rep2-S1_S9_MACS2_rendition_1E-8_downsampled_try3_peak_1531	1095	38.5404	109.582	105.883	132
chr1	91530689	91530993	Project004-IPSHOCH-Exp5-ChIP-ES-2i-CTCF-IP-Blobel-Rep2-S1_S9_MACS2_rendition_1E-8_downsampled_try3_peak_1532	815	22.8125	81.5958	78.3013	149
chr1	91540395	91540647	Project004-IPSHOCH-Exp5-ChIP-ES-2i-CTCF-IP-Blobel-Rep2-S1_S9_MACS2_rendition_1E-8_downsampled_try3_peak_1533	648	24.9601	64.8408	61.7783	119
chr1	91543238	91543550	Project004-IPSHOCH-Exp5-ChIP-ES-2i-CTCF-IP-Blobel-Rep2-S1_S9_MACS2_rendition_1E-8_downsampled_try3_peak_1534	1363	43.712	136.389	132.276	161
chr1	91570352	91570573	Project004-IPSHOCH-Exp5-ChIP-ES-2i-CTCF-IP-Blobel-Rep2-S1_S9_MACS2_rendition_1E-8_downsampled_try3_peak_1535	166	6.86441	16.6443	14.252	80
chr1	91572730	91573242	Project004-IPSHOCH-Exp5-ChIP-ES-2i-CTCF-IP-Blobel-Rep2-S1_S9_MACS2_rendition_1E-8_downsampled_try3_peak_1536	1032	33.6907	103.28	99.6766	342
chr1	91627014	91627381	Project004-IPSHOCH-Exp5-ChIP-ES-2i-CTCF-IP-Blobel-Rep2-S1_S9_MACS2_rendition_1E-8_downsampled_try3_peak_1537	461	13.4746	46.1105	43.2946	219
chr1	91649225	91649585	Project004-IPSHOCH-Exp5-ChIP-ES-2i-CTCF-IP-Blobel-Rep2-S1_S9_MACS2_rendition_1E-8_downsampled_try3_peak_1538	668	24.1364	66.8975	63.809	201
chr1	91654148	91654492	Project004-IPSHOCH-Exp5-ChIP-ES-2i-CTCF-IP-Blobel-Rep2-S1_S9_MACS2_rendition_1E-8_downsampled_try3_peak_1539	924	25	92.4044	88.9614	173
chr1	91666904	91667258	Project004-IPSHOCH-Exp5-ChIP-ES-2i-CTCF-IP-Blobel-Rep2-S1_S9_MACS2_rendition_1E-8_downsampled_try3_peak_1540	442	14.6875	44.2539	41.4596	185
chr1	91675167	91675349	Project004-IPSHOCH-Exp5-ChIP-ES-2i-CTCF-IP-Blobel-Rep2-S1_S9_MACS2_rendition_1E-8_downsampled_try3_peak_1541	276	13.3507	27.6109	25.0415	63
chr1	91717579	91717864	Project004-IPSHOCH-Exp5-ChIP-ES-2i-CTCF-IP-Blobel-Rep2-S1_S9_MACS2_rendition_1E-8_downsampled_try3_peak_1542	316	10.4237	31.6051	28.9764	143
chr1	91740670	91740940	Project004-IPSHOCH-Exp5-ChIP-ES-2i-CTCF-IP-Blobel-Rep2-S1_S9_MACS2_rendition_1E-8_downsampled_try3_peak_1543	638	23.3589	63.825	60.7743	131
chr1	91755829	91756258	Project004-IPSHOCH-Exp5-ChIP-ES-2i-CTCF-IP-Blobel-Rep2-S1_S9_MACS2_rendition_1E-8_downsampled_try3_peak_1544	892	24.375	89.2882	85.8842	163
chr1	91756965	91757169	Project004-IPSHOCH-Exp5-ChIP-ES-2i-CTCF-IP-Blobel-Rep2-S1_S9_MACS2_rendition_1E-8_downsampled_try3_peak_1545	175	6.11111	17.5557	15.1433	97
chr1	91826649	91826819	Project004-IPSHOCH-Exp5-ChIP-ES-2i-CTCF-IP-Blobel-Rep2-S1_S9_MACS2_rendition_1E-8_downsampled_try3_peak_1546	253	10.3113	25.3834	22.8453	54
chr1	91835803	91836195	Project004-IPSHOCH-Exp5-ChIP-ES-2i-CTCF-IP-Blobel-Rep2-S1_S9_MACS2_rendition_1E-8_downsampled_try3_peak_1547	1407	30	140.785	136.6	206
chr1	91836670	91837361	Project004-IPSHOCH-Exp5-ChIP-ES-2i-CTCF-IP-Blobel-Rep2-S1_S9_MACS2_rendition_1E-8_downsampled_try3_peak_1548	1493	35.6111	149.386	145.068	510
chr1	91839836	91840179	Project004-IPSHOCH-Exp5-ChIP-ES-2i-CTCF-IP-Blobel-Rep2-S1_S9_MACS2_rendition_1E-8_downsampled_try3_peak_1549	841	20.5932	84.165	80.8359	171
chr1	91840374	91840671	Project004-IPSHOCH-Exp5-ChIP-ES-2i-CTCF-IP-Blobel-Rep2-S1_S9_MACS2_rendition_1E-8_downsampled_try3_peak_1550	216	10.1351	21.6442	19.1618	186
chr1	91909428	91909779	Project004-IPSHOCH-Exp5-ChIP-ES-2i-CTCF-IP-Blobel-Rep2-S1_S9_MACS2_rendition_1E-8_downsampled_try3_peak_1551	958	27.2891	95.8343	92.3424	214
chr1	91909881	91910228	Project004-IPSHOCH-Exp5-ChIP-ES-2i-CTCF-IP-Blobel-Rep2-S1_S9_MACS2_rendition_1E-8_downsampled_try3_peak_1552	861	23.75	86.1941	82.8353	164
chr1	91923529	91923876	Project004-IPSHOCH-Exp5-ChIP-ES-2i-CTCF-IP-Blobel-Rep2-S1_S9_MACS2_rendition_1E-8_downsampled_try3_peak_1553	800	22.5	80.0747	76.8023	156
chr1	91947994	91948305	Project004-IPSHOCH-Exp5-ChIP-ES-2i-CTCF-IP-Blobel-Rep2-S1_S9_MACS2_rendition_1E-8_downsampled_try3_peak_1554	448	12	44.8162	42.0166	176
chr1	91957189	91957471	Project004-IPSHOCH-Exp5-ChIP-ES-2i-CTCF-IP-Blobel-Rep2-S1_S9_MACS2_rendition_1E-8_downsampled_try3_peak_1555	484	12.6429	48.4151	45.568	149
chr1	91989398	91989604	Project004-IPSHOCH-Exp5-ChIP-ES-2i-CTCF-IP-Blobel-Rep2-S1_S9_MACS2_rendition_1E-8_downsampled_try3_peak_1556	302	13.4763	30.2825	27.6726	102
chr1	92049786	92049956	Project004-IPSHOCH-Exp5-ChIP-ES-2i-CTCF-IP-Blobel-Rep2-S1_S9_MACS2_rendition_1E-8_downsampled_try3_peak_1557	240	9.5995	24.0585	21.5397	106
chr1	92056121	92056877	Project004-IPSHOCH-Exp5-ChIP-ES-2i-CTCF-IP-Blobel-Rep2-S1_S9_MACS2_rendition_1E-8_downsampled_try3_peak_1558	883	29.0897	88.3767	84.9914	581
chr1	92089906	92090062	Project004-IPSHOCH-Exp5-ChIP-ES-2i-CTCF-IP-Blobel-Rep2-S1_S9_MACS2_rendition_1E-8_downsampled_try3_peak_1559	239	12.1429	23.9023	21.3845	95
chr1	92100387	92100721	Project004-IPSHOCH-Exp5-ChIP-ES-2i-CTCF-IP-Blobel-Rep2-S1_S9_MACS2_rendition_1E-8_downsampled_try3_peak_1560	739	19.9229	73.9973	70.8162	131
chr1	92101904	92102121	Project004-IPSHOCH-Exp5-ChIP-ES-2i-CTCF-IP-Blobel-Rep2-S1_S9_MACS2_rendition_1E-8_downsampled_try3_peak_1561	181	5.86957	18.161	15.7391	125
chr1	92169190	92169343	Project004-IPSHOCH-Exp5-ChIP-ES-2i-CTCF-IP-Blobel-Rep2-S1_S9_MACS2_rendition_1E-8_downsampled_try3_peak_1562	176	7.11864	17.6258	15.2116	40
chr1	92187903	92188117	Project004-IPSHOCH-Exp5-ChIP-ES-2i-CTCF-IP-Blobel-Rep2-S1_S9_MACS2_rendition_1E-8_downsampled_try3_peak_1563	164	8.55578	16.412	14.0239	121
chr1	92265986	92266142	Project004-IPSHOCH-Exp5-ChIP-ES-2i-CTCF-IP-Blobel-Rep2-S1_S9_MACS2_rendition_1E-8_downsampled_try3_peak_1564	145	7.7027	14.5288	12.1727	59
chr1	92269428	92269580	Project004-IPSHOCH-Exp5-ChIP-ES-2i-CTCF-IP-Blobel-Rep2-S1_S9_MACS2_rendition_1E-8_downsampled_try3_peak_1565	216	10.1351	21.6442	19.1618	58
chr1	92368416	92368704	Project004-IPSHOCH-Exp5-ChIP-ES-2i-CTCF-IP-Blobel-Rep2-S1_S9_MACS2_rendition_1E-8_downsampled_try3_peak_1566	630	21.8919	63.0066	59.971	167
chr1	92375522	92375717	Project004-IPSHOCH-Exp5-ChIP-ES-2i-CTCF-IP-Blobel-Rep2-S1_S9_MACS2_rendition_1E-8_downsampled_try3_peak_1567	239	10.479	23.9339	21.4157	97
chr1	92453769	92454099	Project004-IPSHOCH-Exp5-ChIP-ES-2i-CTCF-IP-Blobel-Rep2-S1_S9_MACS2_rendition_1E-8_downsampled_try3_peak_1568	1082	28.125	108.299	104.615	172
chr1	92474092	92474303	Project004-IPSHOCH-Exp5-ChIP-ES-2i-CTCF-IP-Blobel-Rep2-S1_S9_MACS2_rendition_1E-8_downsampled_try3_peak_1569	216	10.1351	21.6442	19.1618	94
chr1	92484968	92485274	Project004-IPSHOCH-Exp5-ChIP-ES-2i-CTCF-IP-Blobel-Rep2-S1_S9_MACS2_rendition_1E-8_downsampled_try3_peak_1570	647	15.4286	64.7295	61.668	162
chr1	92487465	92487740	Project004-IPSHOCH-Exp5-ChIP-ES-2i-CTCF-IP-Blobel-Rep2-S1_S9_MACS2_rendition_1E-8_downsampled_try3_peak_1571	594	18.125	59.4496	56.4592	141
chr1	92489405	92489917	Project004-IPSHOCH-Exp5-ChIP-ES-2i-CTCF-IP-Blobel-Rep2-S1_S9_MACS2_rendition_1E-8_downsampled_try3_peak_1572	1002	26.5625	100.288	96.727	227
chr1	92547250	92547608	Project004-IPSHOCH-Exp5-ChIP-ES-2i-CTCF-IP-Blobel-Rep2-S1_S9_MACS2_rendition_1E-8_downsampled_try3_peak_1573	1191	39.9361	119.174	115.329	188
chr1	92689995	92690273	Project004-IPSHOCH-Exp5-ChIP-ES-2i-CTCF-IP-Blobel-Rep2-S1_S9_MACS2_rendition_1E-8_downsampled_try3_peak_1574	216	10.1351	21.6442	19.1618	104
chr1	92726634	92726913	Project004-IPSHOCH-Exp5-ChIP-ES-2i-CTCF-IP-Blobel-Rep2-S1_S9_MACS2_rendition_1E-8_downsampled_try3_peak_1575	348	14.1892	34.8116	32.1402	137
chr1	92736866	92737192	Project004-IPSHOCH-Exp5-ChIP-ES-2i-CTCF-IP-Blobel-Rep2-S1_S9_MACS2_rendition_1E-8_downsampled_try3_peak_1576	890	28.3784	89.0631	85.6641	182
chr1	92746498	92746845	Project004-IPSHOCH-Exp5-ChIP-ES-2i-CTCF-IP-Blobel-Rep2-S1_S9_MACS2_rendition_1E-8_downsampled_try3_peak_1577	569	23.2298	56.9428	53.9834	193
chr1	92768635	92769016	Project004-IPSHOCH-Exp5-ChIP-ES-2i-CTCF-IP-Blobel-Rep2-S1_S9_MACS2_rendition_1E-8_downsampled_try3_peak_1578	420	18.4783	42.0928	39.3241	131
chr1	92802911	92803325	Project004-IPSHOCH-Exp5-ChIP-ES-2i-CTCF-IP-Blobel-Rep2-S1_S9_MACS2_rendition_1E-8_downsampled_try3_peak_1579	971	25.9375	97.1189	93.6061	193
chr1	92806502	92806754	Project004-IPSHOCH-Exp5-ChIP-ES-2i-CTCF-IP-Blobel-Rep2-S1_S9_MACS2_rendition_1E-8_downsampled_try3_peak_1580	462	17.4324	46.2512	43.4318	129
chr1	92825054	92825437	Project004-IPSHOCH-Exp5-ChIP-ES-2i-CTCF-IP-Blobel-Rep2-S1_S9_MACS2_rendition_1E-8_downsampled_try3_peak_1581	855	26.9475	85.5654	82.2212	202
chr1	92853300	92853631	Project004-IPSHOCH-Exp5-ChIP-ES-2i-CTCF-IP-Blobel-Rep2-S1_S9_MACS2_rendition_1E-8_downsampled_try3_peak_1582	538	15	53.8199	50.8997	192
chr1	92869878	92870219	Project004-IPSHOCH-Exp5-ChIP-ES-2i-CTCF-IP-Blobel-Rep2-S1_S9_MACS2_rendition_1E-8_downsampled_try3_peak_1583	1467	35.922	146.706	142.43	131
chr1	92917901	92918209	Project004-IPSHOCH-Exp5-ChIP-ES-2i-CTCF-IP-Blobel-Rep2-S1_S9_MACS2_rendition_1E-8_downsampled_try3_peak_1584	518	21.646	51.8962	49.0047	172
chr1	92995586	92995878	Project004-IPSHOCH-Exp5-ChIP-ES-2i-CTCF-IP-Blobel-Rep2-S1_S9_MACS2_rendition_1E-8_downsampled_try3_peak_1585	917	16.6304	91.7294	88.2954	141
chr1	93004194	93004439	Project004-IPSHOCH-Exp5-ChIP-ES-2i-CTCF-IP-Blobel-Rep2-S1_S9_MACS2_rendition_1E-8_downsampled_try3_peak_1586	290	13.8642	29.0663	26.4746	129
chr1	93025529	93025715	Project004-IPSHOCH-Exp5-ChIP-ES-2i-CTCF-IP-Blobel-Rep2-S1_S9_MACS2_rendition_1E-8_downsampled_try3_peak_1587	179	8.91892	17.9999	15.579	104
chr1	93069163	93069340	Project004-IPSHOCH-Exp5-ChIP-ES-2i-CTCF-IP-Blobel-Rep2-S1_S9_MACS2_rendition_1E-8_downsampled_try3_peak_1588	132	7.91925	13.209	10.8855	48
chr1	93075550	93075937	Project004-IPSHOCH-Exp5-ChIP-ES-2i-CTCF-IP-Blobel-Rep2-S1_S9_MACS2_rendition_1E-8_downsampled_try3_peak_1589	755	21.5625	75.5477	72.342	239
chr1	93096258	93096453	Project004-IPSHOCH-Exp5-ChIP-ES-2i-CTCF-IP-Blobel-Rep2-S1_S9_MACS2_rendition_1E-8_downsampled_try3_peak_1590	204	9.72973	20.4115	17.9491	96
chr1	93107741	93108061	Project004-IPSHOCH-Exp5-ChIP-ES-2i-CTCF-IP-Blobel-Rep2-S1_S9_MACS2_rendition_1E-8_downsampled_try3_peak_1591	558	13.9286	55.8063	52.8618	185
chr1	93135757	93136031	Project004-IPSHOCH-Exp5-ChIP-ES-2i-CTCF-IP-Blobel-Rep2-S1_S9_MACS2_rendition_1E-8_downsampled_try3_peak_1592	485	20.5901	48.5837	45.7327	130
chr1	93148637	93148847	Project004-IPSHOCH-Exp5-ChIP-ES-2i-CTCF-IP-Blobel-Rep2-S1_S9_MACS2_rendition_1E-8_downsampled_try3_peak_1593	293	13.2933	29.3412	26.7472	101
chr1	93243432	93243841	Project004-IPSHOCH-Exp5-ChIP-ES-2i-CTCF-IP-Blobel-Rep2-S1_S9_MACS2_rendition_1E-8_downsampled_try3_peak_1594	1382	42.2257	138.241	134.096	259
chr1	93262678	93263150	Project004-IPSHOCH-Exp5-ChIP-ES-2i-CTCF-IP-Blobel-Rep2-S1_S9_MACS2_rendition_1E-8_downsampled_try3_peak_1595	1621	38.125	162.167	157.661	267
chr1	93277047	93277452	Project004-IPSHOCH-Exp5-ChIP-ES-2i-CTCF-IP-Blobel-Rep2-S1_S9_MACS2_rendition_1E-8_downsampled_try3_peak_1596	1034	27.1875	103.477	99.8674	207
chr1	93286747	93286983	Project004-IPSHOCH-Exp5-ChIP-ES-2i-CTCF-IP-Blobel-Rep2-S1_S9_MACS2_rendition_1E-8_downsampled_try3_peak_1597	124	6.25	12.4453	10.1384	146
chr1	93320665	93320829	Project004-IPSHOCH-Exp5-ChIP-ES-2i-CTCF-IP-Blobel-Rep2-S1_S9_MACS2_rendition_1E-8_downsampled_try3_peak_1598	168	8.51351	16.8225	14.4247	86
chr1	93325255	93325561	Project004-IPSHOCH-Exp5-ChIP-ES-2i-CTCF-IP-Blobel-Rep2-S1_S9_MACS2_rendition_1E-8_downsampled_try3_peak_1599	758	25.1351	75.8121	72.599	151
chr1	93328785	93328937	Project004-IPSHOCH-Exp5-ChIP-ES-2i-CTCF-IP-Blobel-Rep2-S1_S9_MACS2_rendition_1E-8_downsampled_try3_peak_1600	144	8.44721	14.4632	12.1115	66
chr1	93356094	93356263	Project004-IPSHOCH-Exp5-ChIP-ES-2i-CTCF-IP-Blobel-Rep2-S1_S9_MACS2_rendition_1E-8_downsampled_try3_peak_1601	104	4.07767	10.4198	8.17001	65
chr1	93375611	93375860	Project004-IPSHOCH-Exp5-ChIP-ES-2i-CTCF-IP-Blobel-Rep2-S1_S9_MACS2_rendition_1E-8_downsampled_try3_peak_1602	376	15	37.6044	34.895	103
chr1	93379925	93380248	Project004-IPSHOCH-Exp5-ChIP-ES-2i-CTCF-IP-Blobel-Rep2-S1_S9_MACS2_rendition_1E-8_downsampled_try3_peak_1603	595	14.5714	59.5927	56.6012	160
chr1	93382838	93382994	Project004-IPSHOCH-Exp5-ChIP-ES-2i-CTCF-IP-Blobel-Rep2-S1_S9_MACS2_rendition_1E-8_downsampled_try3_peak_1604	179	9.45776	17.9037	15.488	100
chr1	93411614	93411811	Project004-IPSHOCH-Exp5-ChIP-ES-2i-CTCF-IP-Blobel-Rep2-S1_S9_MACS2_rendition_1E-8_downsampled_try3_peak_1605	327	15.3106	32.7313	30.0878	102
chr1	93420340	93420722	Project004-IPSHOCH-Exp5-ChIP-ES-2i-CTCF-IP-Blobel-Rep2-S1_S9_MACS2_rendition_1E-8_downsampled_try3_peak_1606	800	22.5	80.0747	76.8023	181
chr1	93430943	93431277	Project004-IPSHOCH-Exp5-ChIP-ES-2i-CTCF-IP-Blobel-Rep2-S1_S9_MACS2_rendition_1E-8_downsampled_try3_peak_1607	586	18.9987	58.644	55.6626	174
chr1	93460693	93460922	Project004-IPSHOCH-Exp5-ChIP-ES-2i-CTCF-IP-Blobel-Rep2-S1_S9_MACS2_rendition_1E-8_downsampled_try3_peak_1608	320	13.3784	32.0676	29.4335	110
chr1	93470829	93471116	Project004-IPSHOCH-Exp5-ChIP-ES-2i-CTCF-IP-Blobel-Rep2-S1_S9_MACS2_rendition_1E-8_downsampled_try3_peak_1609	708	27.4534	70.815	67.6748	145
chr1	93497265	93497651	Project004-IPSHOCH-Exp5-ChIP-ES-2i-CTCF-IP-Blobel-Rep2-S1_S9_MACS2_rendition_1E-8_downsampled_try3_peak_1610	872	27.338	87.2173	83.8483	204
chr1	93579190	93579360	Project004-IPSHOCH-Exp5-ChIP-ES-2i-CTCF-IP-Blobel-Rep2-S1_S9_MACS2_rendition_1E-8_downsampled_try3_peak_1611	284	13.4784	28.4194	25.8343	74
chr1	93586217	93586479	Project004-IPSHOCH-Exp5-ChIP-ES-2i-CTCF-IP-Blobel-Rep2-S1_S9_MACS2_rendition_1E-8_downsampled_try3_peak_1612	569	23.2298	56.9428	53.9834	114
chr1	93651720	93652038	Project004-IPSHOCH-Exp5-ChIP-ES-2i-CTCF-IP-Blobel-Rep2-S1_S9_MACS2_rendition_1E-8_downsampled_try3_peak_1613	1268	41.9329	126.834	122.866	133
chr1	93704419	93704658	Project004-IPSHOCH-Exp5-ChIP-ES-2i-CTCF-IP-Blobel-Rep2-S1_S9_MACS2_rendition_1E-8_downsampled_try3_peak_1614	517	20.6609	51.7815	48.8935	118
chr1	93715781	93716240	Project004-IPSHOCH-Exp5-ChIP-ES-2i-CTCF-IP-Blobel-Rep2-S1_S9_MACS2_rendition_1E-8_downsampled_try3_peak_1615	997	32.7923	99.7123	96.1608	235
chr1	93771188	93771569	Project004-IPSHOCH-Exp5-ChIP-ES-2i-CTCF-IP-Blobel-Rep2-S1_S9_MACS2_rendition_1E-8_downsampled_try3_peak_1616	591	16.017	59.107	56.1212	246
chr1	93793721	93793968	Project004-IPSHOCH-Exp5-ChIP-ES-2i-CTCF-IP-Blobel-Rep2-S1_S9_MACS2_rendition_1E-8_downsampled_try3_peak_1617	563	22.8551	56.3036	53.3573	105
chr1	93810402	93810818	Project004-IPSHOCH-Exp5-ChIP-ES-2i-CTCF-IP-Blobel-Rep2-S1_S9_MACS2_rendition_1E-8_downsampled_try3_peak_1618	924	29.1892	92.4393	88.9923	208
chr1	93858809	93859192	Project004-IPSHOCH-Exp5-ChIP-ES-2i-CTCF-IP-Blobel-Rep2-S1_S9_MACS2_rendition_1E-8_downsampled_try3_peak_1619	892	24.375	89.2882	85.8842	211
chr1	93865606	93865911	Project004-IPSHOCH-Exp5-ChIP-ES-2i-CTCF-IP-Blobel-Rep2-S1_S9_MACS2_rendition_1E-8_downsampled_try3_peak_1620	564	22.4641	56.4415	53.4942	187
chr1	94018888	94019155	Project004-IPSHOCH-Exp5-ChIP-ES-2i-CTCF-IP-Blobel-Rep2-S1_S9_MACS2_rendition_1E-8_downsampled_try3_peak_1621	480	17.5745	48.0433	45.2022	130
chr1	94075016	94075219	Project004-IPSHOCH-Exp5-ChIP-ES-2i-CTCF-IP-Blobel-Rep2-S1_S9_MACS2_rendition_1E-8_downsampled_try3_peak_1622	390	15.4054	39.0183	36.2879	114
chr1	94106282	94106453	Project004-IPSHOCH-Exp5-ChIP-ES-2i-CTCF-IP-Blobel-Rep2-S1_S9_MACS2_rendition_1E-8_downsampled_try3_peak_1623	169	8.5747	16.9253	14.5262	128
chr1	94172062	94172300	Project004-IPSHOCH-Exp5-ChIP-ES-2i-CTCF-IP-Blobel-Rep2-S1_S9_MACS2_rendition_1E-8_downsampled_try3_peak_1624	362	14.5946	36.202	33.5124	103
chr1	94256854	94257255	Project004-IPSHOCH-Exp5-ChIP-ES-2i-CTCF-IP-Blobel-Rep2-S1_S9_MACS2_rendition_1E-8_downsampled_try3_peak_1625	1050	27.5	105.08	101.445	242
chr1	94350294	94350765	Project004-IPSHOCH-Exp5-ChIP-ES-2i-CTCF-IP-Blobel-Rep2-S1_S9_MACS2_rendition_1E-8_downsampled_try3_peak_1626	925	33.7888	92.5964	89.1465	255
chr1	94371830	94371990	Project004-IPSHOCH-Exp5-ChIP-ES-2i-CTCF-IP-Blobel-Rep2-S1_S9_MACS2_rendition_1E-8_downsampled_try3_peak_1627	150	8.58193	15.0951	12.7329	98
chr1	94417815	94418202	Project004-IPSHOCH-Exp5-ChIP-ES-2i-CTCF-IP-Blobel-Rep2-S1_S9_MACS2_rendition_1E-8_downsampled_try3_peak_1628	741	24.7297	74.1858	70.9967	252
chr1	94507637	94507975	Project004-IPSHOCH-Exp5-ChIP-ES-2i-CTCF-IP-Blobel-Rep2-S1_S9_MACS2_rendition_1E-8_downsampled_try3_peak_1629	941	29.5946	94.1364	90.6656	180
chr1	94511094	94511422	Project004-IPSHOCH-Exp5-ChIP-ES-2i-CTCF-IP-Blobel-Rep2-S1_S9_MACS2_rendition_1E-8_downsampled_try3_peak_1630	638	25.3416	63.8073	60.7572	190
chr1	94529561	94529793	Project004-IPSHOCH-Exp5-ChIP-ES-2i-CTCF-IP-Blobel-Rep2-S1_S9_MACS2_rendition_1E-8_downsampled_try3_peak_1631	502	21.118	50.2346	47.3624	122
chr1	94544360	94544727	Project004-IPSHOCH-Exp5-ChIP-ES-2i-CTCF-IP-Blobel-Rep2-S1_S9_MACS2_rendition_1E-8_downsampled_try3_peak_1632	1235	22.2222	123.506	119.59	183
chr1	94545366	94545735	Project004-IPSHOCH-Exp5-ChIP-ES-2i-CTCF-IP-Blobel-Rep2-S1_S9_MACS2_rendition_1E-8_downsampled_try3_peak_1633	1775	48.2432	177.584	172.869	181
chr1	94593377	94593779	Project004-IPSHOCH-Exp5-ChIP-ES-2i-CTCF-IP-Blobel-Rep2-S1_S9_MACS2_rendition_1E-8_downsampled_try3_peak_1634	1349	45.4037	134.948	130.85	224
chr1	94604496	94604785	Project004-IPSHOCH-Exp5-ChIP-ES-2i-CTCF-IP-Blobel-Rep2-S1_S9_MACS2_rendition_1E-8_downsampled_try3_peak_1635	284	13.4784	28.4194	25.8343	179
chr1	94639565	94639726	Project004-IPSHOCH-Exp5-ChIP-ES-2i-CTCF-IP-Blobel-Rep2-S1_S9_MACS2_rendition_1E-8_downsampled_try3_peak_1636	166	8.98487	16.6486	14.2554	103
chr1	94730553	94730988	Project004-IPSHOCH-Exp5-ChIP-ES-2i-CTCF-IP-Blobel-Rep2-S1_S9_MACS2_rendition_1E-8_downsampled_try3_peak_1637	1076	36.2305	107.647	103.98	241
chr1	94736910	94737065	Project004-IPSHOCH-Exp5-ChIP-ES-2i-CTCF-IP-Blobel-Rep2-S1_S9_MACS2_rendition_1E-8_downsampled_try3_peak_1638	154	7.1875	15.4506	13.0818	64
chr1	94746133	94746401	Project004-IPSHOCH-Exp5-ChIP-ES-2i-CTCF-IP-Blobel-Rep2-S1_S9_MACS2_rendition_1E-8_downsampled_try3_peak_1639	375	15.4004	37.5877	34.8816	129
chr1	94791599	94792022	Project004-IPSHOCH-Exp5-ChIP-ES-2i-CTCF-IP-Blobel-Rep2-S1_S9_MACS2_rendition_1E-8_downsampled_try3_peak_1640	1530	50.1553	153.016	148.648	244
chr1	94803405	94803785	Project004-IPSHOCH-Exp5-ChIP-ES-2i-CTCF-IP-Blobel-Rep2-S1_S9_MACS2_rendition_1E-8_downsampled_try3_peak_1641	1099	28.4375	109.915	106.207	189
chr1	94805693	94805978	Project004-IPSHOCH-Exp5-ChIP-ES-2i-CTCF-IP-Blobel-Rep2-S1_S9_MACS2_rendition_1E-8_downsampled_try3_peak_1642	429	14.375	42.9238	40.148	136
chr1	94807190	94807432	Project004-IPSHOCH-Exp5-ChIP-ES-2i-CTCF-IP-Blobel-Rep2-S1_S9_MACS2_rendition_1E-8_downsampled_try3_peak_1643	783	23.4893	78.3289	75.085	126
chr1	94828266	94828538	Project004-IPSHOCH-Exp5-ChIP-ES-2i-CTCF-IP-Blobel-Rep2-S1_S9_MACS2_rendition_1E-8_downsampled_try3_peak_1644	293	12.5676	29.3754	26.7781	150
chr1	94846036	94846371	Project004-IPSHOCH-Exp5-ChIP-ES-2i-CTCF-IP-Blobel-Rep2-S1_S9_MACS2_rendition_1E-8_downsampled_try3_peak_1645	714	26.2859	71.4591	68.3065	185
chr1	94853240	94853514	Project004-IPSHOCH-Exp5-ChIP-ES-2i-CTCF-IP-Blobel-Rep2-S1_S9_MACS2_rendition_1E-8_downsampled_try3_peak_1646	709	23.9189	70.9547	67.8104	136
chr1	94881706	94881911	Project004-IPSHOCH-Exp5-ChIP-ES-2i-CTCF-IP-Blobel-Rep2-S1_S9_MACS2_rendition_1E-8_downsampled_try3_peak_1647	255	12.48	25.5746	23.0301	67
chr1	94882177	94882402	Project004-IPSHOCH-Exp5-ChIP-ES-2i-CTCF-IP-Blobel-Rep2-S1_S9_MACS2_rendition_1E-8_downsampled_try3_peak_1648	297	14.2547	29.7236	27.1208	121
chr1	94907281	94907618	Project004-IPSHOCH-Exp5-ChIP-ES-2i-CTCF-IP-Blobel-Rep2-S1_S9_MACS2_rendition_1E-8_downsampled_try3_peak_1649	566	17.5	56.6146	53.6626	175
chr1	94911048	94911405	Project004-IPSHOCH-Exp5-ChIP-ES-2i-CTCF-IP-Blobel-Rep2-S1_S9_MACS2_rendition_1E-8_downsampled_try3_peak_1650	1131	29.0625	113.163	109.411	192
chr1	94925921	94926141	Project004-IPSHOCH-Exp5-ChIP-ES-2i-CTCF-IP-Blobel-Rep2-S1_S9_MACS2_rendition_1E-8_downsampled_try3_peak_1651	157	8.97516	15.7436	13.3619	110
chr1	94969150	94969384	Project004-IPSHOCH-Exp5-ChIP-ES-2i-CTCF-IP-Blobel-Rep2-S1_S9_MACS2_rendition_1E-8_downsampled_try3_peak_1652	352	14.0596	35.2717	32.5947	126
chr1	94977529	94977891	Project004-IPSHOCH-Exp5-ChIP-ES-2i-CTCF-IP-Blobel-Rep2-S1_S9_MACS2_rendition_1E-8_downsampled_try3_peak_1653	1570	51.2112	157.082	152.65	198
chr1	94982780	94983013	Project004-IPSHOCH-Exp5-ChIP-ES-2i-CTCF-IP-Blobel-Rep2-S1_S9_MACS2_rendition_1E-8_downsampled_try3_peak_1654	373	16.4736	37.3156	34.6168	97
chr1	94987772	94987973	Project004-IPSHOCH-Exp5-ChIP-ES-2i-CTCF-IP-Blobel-Rep2-S1_S9_MACS2_rendition_1E-8_downsampled_try3_peak_1655	130	6.82602	13.0452	10.7295	101
chr1	94988387	94988613	Project004-IPSHOCH-Exp5-ChIP-ES-2i-CTCF-IP-Blobel-Rep2-S1_S9_MACS2_rendition_1E-8_downsampled_try3_peak_1656	336	13.8828	33.6041	30.9503	113
chr1	95025338	95025728	Project004-IPSHOCH-Exp5-ChIP-ES-2i-CTCF-IP-Blobel-Rep2-S1_S9_MACS2_rendition_1E-8_downsampled_try3_peak_1657	1238	36.4865	123.832	119.908	139
chr1	95049640	95049806	Project004-IPSHOCH-Exp5-ChIP-ES-2i-CTCF-IP-Blobel-Rep2-S1_S9_MACS2_rendition_1E-8_downsampled_try3_peak_1658	206	10.8453	20.6962	18.2308	112
chr1	95070956	95071372	Project004-IPSHOCH-Exp5-ChIP-ES-2i-CTCF-IP-Blobel-Rep2-S1_S9_MACS2_rendition_1E-8_downsampled_try3_peak_1659	1687	47.9124	168.723	164.125	208
chr1	95091601	95091761	Project004-IPSHOCH-Exp5-ChIP-ES-2i-CTCF-IP-Blobel-Rep2-S1_S9_MACS2_rendition_1E-8_downsampled_try3_peak_1660	186	7.37288	18.6225	16.1885	116
chr1	95120578	95120922	Project004-IPSHOCH-Exp5-ChIP-ES-2i-CTCF-IP-Blobel-Rep2-S1_S9_MACS2_rendition_1E-8_downsampled_try3_peak_1661	1264	27.7119	126.479	122.517	173
chr1	95133156	95133452	Project004-IPSHOCH-Exp5-ChIP-ES-2i-CTCF-IP-Blobel-Rep2-S1_S9_MACS2_rendition_1E-8_downsampled_try3_peak_1662	524	16.5625	52.4199	49.5206	163
chr1	95134911	95135082	Project004-IPSHOCH-Exp5-ChIP-ES-2i-CTCF-IP-Blobel-Rep2-S1_S9_MACS2_rendition_1E-8_downsampled_try3_peak_1663	204	9.72973	20.4115	17.9491	41
chr1	95211477	95211712	Project004-IPSHOCH-Exp5-ChIP-ES-2i-CTCF-IP-Blobel-Rep2-S1_S9_MACS2_rendition_1E-8_downsampled_try3_peak_1664	254	11.3514	25.4413	22.8977	139
chr1	95275733	95276023	Project004-IPSHOCH-Exp5-ChIP-ES-2i-CTCF-IP-Blobel-Rep2-S1_S9_MACS2_rendition_1E-8_downsampled_try3_peak_1665	507	20.5099	50.7406	47.8643	139
chr1	95296620	95296867	Project004-IPSHOCH-Exp5-ChIP-ES-2i-CTCF-IP-Blobel-Rep2-S1_S9_MACS2_rendition_1E-8_downsampled_try3_peak_1666	383	13.4708	38.3578	35.6424	108
chr1	95346776	95346946	Project004-IPSHOCH-Exp5-ChIP-ES-2i-CTCF-IP-Blobel-Rep2-S1_S9_MACS2_rendition_1E-8_downsampled_try3_peak_1667	278	13.1136	27.8087	25.2361	66
chr1	95375042	95375220	Project004-IPSHOCH-Exp5-ChIP-ES-2i-CTCF-IP-Blobel-Rep2-S1_S9_MACS2_rendition_1E-8_downsampled_try3_peak_1668	197	8.4375	19.7116	17.2628	108
chr1	95403723	95403924	Project004-IPSHOCH-Exp5-ChIP-ES-2i-CTCF-IP-Blobel-Rep2-S1_S9_MACS2_rendition_1E-8_downsampled_try3_peak_1669	357	15.9744	35.7981	33.1142	98
chr1	95490560	95490865	Project004-IPSHOCH-Exp5-ChIP-ES-2i-CTCF-IP-Blobel-Rep2-S1_S9_MACS2_rendition_1E-8_downsampled_try3_peak_1670	447	17.027	44.7837	41.9846	135
chr1	95499620	95499858	Project004-IPSHOCH-Exp5-ChIP-ES-2i-CTCF-IP-Blobel-Rep2-S1_S9_MACS2_rendition_1E-8_downsampled_try3_peak_1671	394	17.3592	39.4986	36.7658	119
chr1	95504410	95504596	Project004-IPSHOCH-Exp5-ChIP-ES-2i-CTCF-IP-Blobel-Rep2-S1_S9_MACS2_rendition_1E-8_downsampled_try3_peak_1672	164	7.5	16.4902	14.0994	90
chr1	95545376	95545621	Project004-IPSHOCH-Exp5-ChIP-ES-2i-CTCF-IP-Blobel-Rep2-S1_S9_MACS2_rendition_1E-8_downsampled_try3_peak_1673	267	13.1988	26.7789	24.2164	100
chr1	95554098	95554288	Project004-IPSHOCH-Exp5-ChIP-ES-2i-CTCF-IP-Blobel-Rep2-S1_S9_MACS2_rendition_1E-8_downsampled_try3_peak_1674	168	8.51351	16.8225	14.4247	124
chr1	95557873	95558161	Project004-IPSHOCH-Exp5-ChIP-ES-2i-CTCF-IP-Blobel-Rep2-S1_S9_MACS2_rendition_1E-8_downsampled_try3_peak_1675	216	8.13559	21.6982	19.2146	137
chr1	95564485	95564654	Project004-IPSHOCH-Exp5-ChIP-ES-2i-CTCF-IP-Blobel-Rep2-S1_S9_MACS2_rendition_1E-8_downsampled_try3_peak_1676	200	9.83915	20.0631	17.6067	111
chr1	95565262	95565583	Project004-IPSHOCH-Exp5-ChIP-ES-2i-CTCF-IP-Blobel-Rep2-S1_S9_MACS2_rendition_1E-8_downsampled_try3_peak_1677	548	11.7391	54.836	51.9084	167
chr1	95583077	95583322	Project004-IPSHOCH-Exp5-ChIP-ES-2i-CTCF-IP-Blobel-Rep2-S1_S9_MACS2_rendition_1E-8_downsampled_try3_peak_1678	472	13.9965	47.2287	44.3962	137
chr1	95622804	95623055	Project004-IPSHOCH-Exp5-ChIP-ES-2i-CTCF-IP-Blobel-Rep2-S1_S9_MACS2_rendition_1E-8_downsampled_try3_peak_1679	364	12.8125	36.4172	33.7228	129
chr1	95623548	95623908	Project004-IPSHOCH-Exp5-ChIP-ES-2i-CTCF-IP-Blobel-Rep2-S1_S9_MACS2_rendition_1E-8_downsampled_try3_peak_1680	1101	31.8114	110.192	106.481	196
chr1	95639529	95639821	Project004-IPSHOCH-Exp5-ChIP-ES-2i-CTCF-IP-Blobel-Rep2-S1_S9_MACS2_rendition_1E-8_downsampled_try3_peak_1681	638	24.8761	63.8502	60.7994	147
chr1	95698522	95698731	Project004-IPSHOCH-Exp5-ChIP-ES-2i-CTCF-IP-Blobel-Rep2-S1_S9_MACS2_rendition_1E-8_downsampled_try3_peak_1682	175	7.53128	17.5007	15.0908	59
chr1	95700158	95700648	Project004-IPSHOCH-Exp5-ChIP-ES-2i-CTCF-IP-Blobel-Rep2-S1_S9_MACS2_rendition_1E-8_downsampled_try3_peak_1683	2358	57.2605	235.869	230.454	254
chr1	95724208	95724583	Project004-IPSHOCH-Exp5-ChIP-ES-2i-CTCF-IP-Blobel-Rep2-S1_S9_MACS2_rendition_1E-8_downsampled_try3_peak_1684	678	22.6515	67.8274	64.7243	145
chr1	95787603	95787917	Project004-IPSHOCH-Exp5-ChIP-ES-2i-CTCF-IP-Blobel-Rep2-S1_S9_MACS2_rendition_1E-8_downsampled_try3_peak_1685	326	11.875	32.6367	29.9974	112
chr1	95793984	95794274	Project004-IPSHOCH-Exp5-ChIP-ES-2i-CTCF-IP-Blobel-Rep2-S1_S9_MACS2_rendition_1E-8_downsampled_try3_peak_1686	570	14.1429	57.0619	54.1001	129
chr1	95821808	95822000	Project004-IPSHOCH-Exp5-ChIP-ES-2i-CTCF-IP-Blobel-Rep2-S1_S9_MACS2_rendition_1E-8_downsampled_try3_peak_1687	170	9.50311	17.0487	14.6428	75
chr1	95863108	95863357	Project004-IPSHOCH-Exp5-ChIP-ES-2i-CTCF-IP-Blobel-Rep2-S1_S9_MACS2_rendition_1E-8_downsampled_try3_peak_1688	580	17.8125	58.0283	55.0577	112
chr1	95866123	95866303	Project004-IPSHOCH-Exp5-ChIP-ES-2i-CTCF-IP-Blobel-Rep2-S1_S9_MACS2_rendition_1E-8_downsampled_try3_peak_1689	169	9.45935	16.976	14.5765	74
chr1	95890328	95890517	Project004-IPSHOCH-Exp5-ChIP-ES-2i-CTCF-IP-Blobel-Rep2-S1_S9_MACS2_rendition_1E-8_downsampled_try3_peak_1690	183	10.0311	18.3771	15.9485	68
chr1	95908233	95908502	Project004-IPSHOCH-Exp5-ChIP-ES-2i-CTCF-IP-Blobel-Rep2-S1_S9_MACS2_rendition_1E-8_downsampled_try3_peak_1691	389	17.4224	38.9194	36.1955	141
chr1	95912446	95912599	Project004-IPSHOCH-Exp5-ChIP-ES-2i-CTCF-IP-Blobel-Rep2-S1_S9_MACS2_rendition_1E-8_downsampled_try3_peak_1692	179	8.91892	17.9999	15.579	75
chr1	95931491	95931979	Project004-IPSHOCH-Exp5-ChIP-ES-2i-CTCF-IP-Blobel-Rep2-S1_S9_MACS2_rendition_1E-8_downsampled_try3_peak_1693	929	22.1186	92.9226	89.468	165
chr1	95975671	95976075	Project004-IPSHOCH-Exp5-ChIP-ES-2i-CTCF-IP-Blobel-Rep2-S1_S9_MACS2_rendition_1E-8_downsampled_try3_peak_1694	1456	30.7627	145.621	141.364	203
chr1	96036052	96036323	Project004-IPSHOCH-Exp5-ChIP-ES-2i-CTCF-IP-Blobel-Rep2-S1_S9_MACS2_rendition_1E-8_downsampled_try3_peak_1695	535	22.1739	53.5683	50.6563	133
chr1	97010154	97010363	Project004-IPSHOCH-Exp5-ChIP-ES-2i-CTCF-IP-Blobel-Rep2-S1_S9_MACS2_rendition_1E-8_downsampled_try3_peak_1696	420	18.4783	42.0928	39.3241	104
chr1	97293777	97294083	Project004-IPSHOCH-Exp5-ChIP-ES-2i-CTCF-IP-Blobel-Rep2-S1_S9_MACS2_rendition_1E-8_downsampled_try3_peak_1697	535	22.1739	53.5683	50.6563	176
chr1	97658815	97659174	Project004-IPSHOCH-Exp5-ChIP-ES-2i-CTCF-IP-Blobel-Rep2-S1_S9_MACS2_rendition_1E-8_downsampled_try3_peak_1698	823	26.7568	82.3854	79.0812	188
chr1	98664926	98665109	Project004-IPSHOCH-Exp5-ChIP-ES-2i-CTCF-IP-Blobel-Rep2-S1_S9_MACS2_rendition_1E-8_downsampled_try3_peak_1699	254	11.3514	25.4413	22.8977	103
chr1	98685955	98686139	Project004-IPSHOCH-Exp5-ChIP-ES-2i-CTCF-IP-Blobel-Rep2-S1_S9_MACS2_rendition_1E-8_downsampled_try3_peak_1700	210	11.087	21.0994	18.6237	98
chr1	98698306	98698629	Project004-IPSHOCH-Exp5-ChIP-ES-2i-CTCF-IP-Blobel-Rep2-S1_S9_MACS2_rendition_1E-8_downsampled_try3_peak_1701	404	17.9503	40.4998	37.7504	125
chr1	98743354	98743610	Project004-IPSHOCH-Exp5-ChIP-ES-2i-CTCF-IP-Blobel-Rep2-S1_S9_MACS2_rendition_1E-8_downsampled_try3_peak_1702	512	14.4915	51.2195	48.3347	106
chr1	98792790	98792945	Project004-IPSHOCH-Exp5-ChIP-ES-2i-CTCF-IP-Blobel-Rep2-S1_S9_MACS2_rendition_1E-8_downsampled_try3_peak_1703	170	9.50311	17.0487	14.6428	62
chr1	98915574	98915917	Project004-IPSHOCH-Exp5-ChIP-ES-2i-CTCF-IP-Blobel-Rep2-S1_S9_MACS2_rendition_1E-8_downsampled_try3_peak_1704	797	30.0932	79.7598	76.495	182
chr1	98935177	98935432	Project004-IPSHOCH-Exp5-ChIP-ES-2i-CTCF-IP-Blobel-Rep2-S1_S9_MACS2_rendition_1E-8_downsampled_try3_peak_1705	419	16.6838	41.949	39.1846	143
chr1	99143435	99143587	Project004-IPSHOCH-Exp5-ChIP-ES-2i-CTCF-IP-Blobel-Rep2-S1_S9_MACS2_rendition_1E-8_downsampled_try3_peak_1706	132	7.91925	13.209	10.8855	12
chr1	99543699	99543945	Project004-IPSHOCH-Exp5-ChIP-ES-2i-CTCF-IP-Blobel-Rep2-S1_S9_MACS2_rendition_1E-8_downsampled_try3_peak_1707	496	19.8613	49.6403	46.7784	98
chr1	99585400	99585719	Project004-IPSHOCH-Exp5-ChIP-ES-2i-CTCF-IP-Blobel-Rep2-S1_S9_MACS2_rendition_1E-8_downsampled_try3_peak_1708	843	27.3574	84.389	81.0582	171
chr1	99623332	99623575	Project004-IPSHOCH-Exp5-ChIP-ES-2i-CTCF-IP-Blobel-Rep2-S1_S9_MACS2_rendition_1E-8_downsampled_try3_peak_1709	326	11.875	32.6367	29.9974	142
chr1	99666917	99667156	Project004-IPSHOCH-Exp5-ChIP-ES-2i-CTCF-IP-Blobel-Rep2-S1_S9_MACS2_rendition_1E-8_downsampled_try3_peak_1710	474	15.9659	47.4311	44.5967	105
chr1	99681570	99681773	Project004-IPSHOCH-Exp5-ChIP-ES-2i-CTCF-IP-Blobel-Rep2-S1_S9_MACS2_rendition_1E-8_downsampled_try3_peak_1711	204	9.72973	20.4115	17.9491	104
chr1	99690728	99690959	Project004-IPSHOCH-Exp5-ChIP-ES-2i-CTCF-IP-Blobel-Rep2-S1_S9_MACS2_rendition_1E-8_downsampled_try3_peak_1712	191	9.32432	19.1965	16.7542	143
chr1	99699187	99699475	Project004-IPSHOCH-Exp5-ChIP-ES-2i-CTCF-IP-Blobel-Rep2-S1_S9_MACS2_rendition_1E-8_downsampled_try3_peak_1713	392	15.5161	39.2101	36.4785	140
chr1	99706177	99706355	Project004-IPSHOCH-Exp5-ChIP-ES-2i-CTCF-IP-Blobel-Rep2-S1_S9_MACS2_rendition_1E-8_downsampled_try3_peak_1714	253	12.6708	25.3317	22.7939	84
chr1	99773590	99774063	Project004-IPSHOCH-Exp5-ChIP-ES-2i-CTCF-IP-Blobel-Rep2-S1_S9_MACS2_rendition_1E-8_downsampled_try3_peak_1715	535	22.1739	53.5683	50.6563	211
chr1	99950172	99950331	Project004-IPSHOCH-Exp5-ChIP-ES-2i-CTCF-IP-Blobel-Rep2-S1_S9_MACS2_rendition_1E-8_downsampled_try3_peak_1716	194	10.3887	19.4439	17.0005	107
chr1	99968601	99968999	Project004-IPSHOCH-Exp5-ChIP-ES-2i-CTCF-IP-Blobel-Rep2-S1_S9_MACS2_rendition_1E-8_downsampled_try3_peak_1717	538	15	53.8199	50.8997	247
chr1	100041516	100041756	Project004-IPSHOCH-Exp5-ChIP-ES-2i-CTCF-IP-Blobel-Rep2-S1_S9_MACS2_rendition_1E-8_downsampled_try3_peak_1718	502	21.118	50.2346	47.3624	103
chr1	100075676	100076053	Project004-IPSHOCH-Exp5-ChIP-ES-2i-CTCF-IP-Blobel-Rep2-S1_S9_MACS2_rendition_1E-8_downsampled_try3_peak_1719	841	20.5932	84.165	80.8359	144
chr1	100246971	100247129	Project004-IPSHOCH-Exp5-ChIP-ES-2i-CTCF-IP-Blobel-Rep2-S1_S9_MACS2_rendition_1E-8_downsampled_try3_peak_1720	164	7.5	16.4902	14.0994	94
chr1	100336833	100337039	Project004-IPSHOCH-Exp5-ChIP-ES-2i-CTCF-IP-Blobel-Rep2-S1_S9_MACS2_rendition_1E-8_downsampled_try3_peak_1721	312	14.7826	31.2198	28.5969	130
chr1	100419695	100419895	Project004-IPSHOCH-Exp5-ChIP-ES-2i-CTCF-IP-Blobel-Rep2-S1_S9_MACS2_rendition_1E-8_downsampled_try3_peak_1722	210	11.087	21.0994	18.6237	92
chr1	100645535	100645758	Project004-IPSHOCH-Exp5-ChIP-ES-2i-CTCF-IP-Blobel-Rep2-S1_S9_MACS2_rendition_1E-8_downsampled_try3_peak_1723	219	9.0625	21.9387	19.4506	110
chr1	101670807	101671003	Project004-IPSHOCH-Exp5-ChIP-ES-2i-CTCF-IP-Blobel-Rep2-S1_S9_MACS2_rendition_1E-8_downsampled_try3_peak_1724	307	12.973	30.7148	28.099	88
chr1	102453488	102453855	Project004-IPSHOCH-Exp5-ChIP-ES-2i-CTCF-IP-Blobel-Rep2-S1_S9_MACS2_rendition_1E-8_downsampled_try3_peak_1725	638	25.3416	63.8073	60.7572	191
chr1	102552638	102552901	Project004-IPSHOCH-Exp5-ChIP-ES-2i-CTCF-IP-Blobel-Rep2-S1_S9_MACS2_rendition_1E-8_downsampled_try3_peak_1726	297	14.2547	29.7236	27.1208	129
chr1	102784026	102784207	Project004-IPSHOCH-Exp5-ChIP-ES-2i-CTCF-IP-Blobel-Rep2-S1_S9_MACS2_rendition_1E-8_downsampled_try3_peak_1727	248	8.8983	24.8937	22.3625	101
chr1	103335470	103335687	Project004-IPSHOCH-Exp5-ChIP-ES-2i-CTCF-IP-Blobel-Rep2-S1_S9_MACS2_rendition_1E-8_downsampled_try3_peak_1728	175	7.8125	17.5473	15.135	95
chr1	103525658	103525875	Project004-IPSHOCH-Exp5-ChIP-ES-2i-CTCF-IP-Blobel-Rep2-S1_S9_MACS2_rendition_1E-8_downsampled_try3_peak_1729	241	10.9459	24.1597	21.6374	123
chr1	104275243	104275568	Project004-IPSHOCH-Exp5-ChIP-ES-2i-CTCF-IP-Blobel-Rep2-S1_S9_MACS2_rendition_1E-8_downsampled_try3_peak_1730	708	27.4534	70.815	67.6748	129
chr1	105036832	105037000	Project004-IPSHOCH-Exp5-ChIP-ES-2i-CTCF-IP-Blobel-Rep2-S1_S9_MACS2_rendition_1E-8_downsampled_try3_peak_1731	183	10.0311	18.3771	15.9485	80
chr1	105164465	105164638	Project004-IPSHOCH-Exp5-ChIP-ES-2i-CTCF-IP-Blobel-Rep2-S1_S9_MACS2_rendition_1E-8_downsampled_try3_peak_1732	183	10.0311	18.3771	15.9485	56
chr1	105235250	105235439	Project004-IPSHOCH-Exp5-ChIP-ES-2i-CTCF-IP-Blobel-Rep2-S1_S9_MACS2_rendition_1E-8_downsampled_try3_peak_1733	231	11.3493	23.1256	20.6178	79
chr1	105533509	105533731	Project004-IPSHOCH-Exp5-ChIP-ES-2i-CTCF-IP-Blobel-Rep2-S1_S9_MACS2_rendition_1E-8_downsampled_try3_peak_1734	404	17.9503	40.4998	37.7504	100
chr1	105659403	105659676	Project004-IPSHOCH-Exp5-ChIP-ES-2i-CTCF-IP-Blobel-Rep2-S1_S9_MACS2_rendition_1E-8_downsampled_try3_peak_1735	423	12.7119	42.3632	39.5922	137
chr1	105695976	105696217	Project004-IPSHOCH-Exp5-ChIP-ES-2i-CTCF-IP-Blobel-Rep2-S1_S9_MACS2_rendition_1E-8_downsampled_try3_peak_1736	312	14.7826	31.2198	28.5969	112
chr1	105883479	105883793	Project004-IPSHOCH-Exp5-ChIP-ES-2i-CTCF-IP-Blobel-Rep2-S1_S9_MACS2_rendition_1E-8_downsampled_try3_peak_1737	436	19.0062	43.698	40.9081	144
chr1	106506039	106506328	Project004-IPSHOCH-Exp5-ChIP-ES-2i-CTCF-IP-Blobel-Rep2-S1_S9_MACS2_rendition_1E-8_downsampled_try3_peak_1738	924	29.1892	92.4393	88.9923	142
chr1	106841414	106841627	Project004-IPSHOCH-Exp5-ChIP-ES-2i-CTCF-IP-Blobel-Rep2-S1_S9_MACS2_rendition_1E-8_downsampled_try3_peak_1739	301	11.25	30.1722	27.5636	96
chr1	106882793	106883159	Project004-IPSHOCH-Exp5-ChIP-ES-2i-CTCF-IP-Blobel-Rep2-S1_S9_MACS2_rendition_1E-8_downsampled_try3_peak_1740	944	34.3168	94.4581	90.9801	176
chr1	106989125	106989417	Project004-IPSHOCH-Exp5-ChIP-ES-2i-CTCF-IP-Blobel-Rep2-S1_S9_MACS2_rendition_1E-8_downsampled_try3_peak_1741	364	12.8125	36.4172	33.7228	172
chr1	107259327	107259724	Project004-IPSHOCH-Exp5-ChIP-ES-2i-CTCF-IP-Blobel-Rep2-S1_S9_MACS2_rendition_1E-8_downsampled_try3_peak_1742	848	29.7919	84.8036	81.4669	183
chr1	107460441	107460716	Project004-IPSHOCH-Exp5-ChIP-ES-2i-CTCF-IP-Blobel-Rep2-S1_S9_MACS2_rendition_1E-8_downsampled_try3_peak_1743	293	9.91525	29.3234	26.7296	138
chr1	107527182	107527445	Project004-IPSHOCH-Exp5-ChIP-ES-2i-CTCF-IP-Blobel-Rep2-S1_S9_MACS2_rendition_1E-8_downsampled_try3_peak_1744	693	23.5135	69.35	66.2263	126
chr1	107555181	107555386	Project004-IPSHOCH-Exp5-ChIP-ES-2i-CTCF-IP-Blobel-Rep2-S1_S9_MACS2_rendition_1E-8_downsampled_try3_peak_1745	253	12.6708	25.3317	22.7939	97
chr1	107556646	107556959	Project004-IPSHOCH-Exp5-ChIP-ES-2i-CTCF-IP-Blobel-Rep2-S1_S9_MACS2_rendition_1E-8_downsampled_try3_peak_1746	752	27.9553	75.2021	72.0032	151
chr1	107577259	107577548	Project004-IPSHOCH-Exp5-ChIP-ES-2i-CTCF-IP-Blobel-Rep2-S1_S9_MACS2_rendition_1E-8_downsampled_try3_peak_1747	571	20.9617	57.1633	54.2002	151
chr1	107607773	107608221	Project004-IPSHOCH-Exp5-ChIP-ES-2i-CTCF-IP-Blobel-Rep2-S1_S9_MACS2_rendition_1E-8_downsampled_try3_peak_1748	617	21.6409	61.7108	58.6917	247
chr1	107631892	107632190	Project004-IPSHOCH-Exp5-ChIP-ES-2i-CTCF-IP-Blobel-Rep2-S1_S9_MACS2_rendition_1E-8_downsampled_try3_peak_1749	376	15	37.6044	34.895	139
chr1	107677053	107677306	Project004-IPSHOCH-Exp5-ChIP-ES-2i-CTCF-IP-Blobel-Rep2-S1_S9_MACS2_rendition_1E-8_downsampled_try3_peak_1750	595	17.3799	59.5933	56.6017	115
chr1	107777703	107777890	Project004-IPSHOCH-Exp5-ChIP-ES-2i-CTCF-IP-Blobel-Rep2-S1_S9_MACS2_rendition_1E-8_downsampled_try3_peak_1751	219	9.0625	21.9387	19.4506	78
chr1	107782286	107782471	Project004-IPSHOCH-Exp5-ChIP-ES-2i-CTCF-IP-Blobel-Rep2-S1_S9_MACS2_rendition_1E-8_downsampled_try3_peak_1752	115	7.10747	11.5194	9.23719	47
chr1	107787694	107787951	Project004-IPSHOCH-Exp5-ChIP-ES-2i-CTCF-IP-Blobel-Rep2-S1_S9_MACS2_rendition_1E-8_downsampled_try3_peak_1753	822	28.3002	82.2434	78.945	122
chr1	107801346	107801707	Project004-IPSHOCH-Exp5-ChIP-ES-2i-CTCF-IP-Blobel-Rep2-S1_S9_MACS2_rendition_1E-8_downsampled_try3_peak_1754	1115	37.9393	111.6	107.866	154
chr1	107933551	107934029	Project004-IPSHOCH-Exp5-ChIP-ES-2i-CTCF-IP-Blobel-Rep2-S1_S9_MACS2_rendition_1E-8_downsampled_try3_peak_1755	1326	40.8781	132.601	128.549	181
chr1	107967866	107968177	Project004-IPSHOCH-Exp5-ChIP-ES-2i-CTCF-IP-Blobel-Rep2-S1_S9_MACS2_rendition_1E-8_downsampled_try3_peak_1756	1006	30.4624	100.648	97.0811	136
chr1	108048388	108048703	Project004-IPSHOCH-Exp5-ChIP-ES-2i-CTCF-IP-Blobel-Rep2-S1_S9_MACS2_rendition_1E-8_downsampled_try3_peak_1757	699	26.4577	69.9849	66.8538	140
chr1	108048825	108049074	Project004-IPSHOCH-Exp5-ChIP-ES-2i-CTCF-IP-Blobel-Rep2-S1_S9_MACS2_rendition_1E-8_downsampled_try3_peak_1758	179	8.91892	17.9999	15.579	121
chr1	108067759	108068049	Project004-IPSHOCH-Exp5-ChIP-ES-2i-CTCF-IP-Blobel-Rep2-S1_S9_MACS2_rendition_1E-8_downsampled_try3_peak_1759	852	29.4876	85.2304	81.8876	146
chr1	108243406	108243649	Project004-IPSHOCH-Exp5-ChIP-ES-2i-CTCF-IP-Blobel-Rep2-S1_S9_MACS2_rendition_1E-8_downsampled_try3_peak_1760	638	25.3416	63.8073	60.7572	145
chr1	108286388	108286704	Project004-IPSHOCH-Exp5-ChIP-ES-2i-CTCF-IP-Blobel-Rep2-S1_S9_MACS2_rendition_1E-8_downsampled_try3_peak_1761	661	22.7027	66.1629	63.0818	150
chr1	108292156	108292472	Project004-IPSHOCH-Exp5-ChIP-ES-2i-CTCF-IP-Blobel-Rep2-S1_S9_MACS2_rendition_1E-8_downsampled_try3_peak_1762	672	17.5424	67.2407	64.1494	150
chr1	108321756	108322393	Project004-IPSHOCH-Exp5-ChIP-ES-2i-CTCF-IP-Blobel-Rep2-S1_S9_MACS2_rendition_1E-8_downsampled_try3_peak_1763	924	29.1892	92.4393	88.9923	144
chr1	108408182	108408531	Project004-IPSHOCH-Exp5-ChIP-ES-2i-CTCF-IP-Blobel-Rep2-S1_S9_MACS2_rendition_1E-8_downsampled_try3_peak_1764	1009	31.2162	100.983	97.4101	172
chr1	108439370	108439653	Project004-IPSHOCH-Exp5-ChIP-ES-2i-CTCF-IP-Blobel-Rep2-S1_S9_MACS2_rendition_1E-8_downsampled_try3_peak_1765	672	26.3975	67.294	64.1994	147
chr1	108441457	108441772	Project004-IPSHOCH-Exp5-ChIP-ES-2i-CTCF-IP-Blobel-Rep2-S1_S9_MACS2_rendition_1E-8_downsampled_try3_peak_1766	482	15.625	48.2983	45.4524	136
chr1	108447259	108447456	Project004-IPSHOCH-Exp5-ChIP-ES-2i-CTCF-IP-Blobel-Rep2-S1_S9_MACS2_rendition_1E-8_downsampled_try3_peak_1767	267	13.1988	26.7789	24.2164	99
chr1	108525398	108525653	Project004-IPSHOCH-Exp5-ChIP-ES-2i-CTCF-IP-Blobel-Rep2-S1_S9_MACS2_rendition_1E-8_downsampled_try3_peak_1768	569	23.2298	56.9428	53.9834	109
chr1	108608969	108609195	Project004-IPSHOCH-Exp5-ChIP-ES-2i-CTCF-IP-Blobel-Rep2-S1_S9_MACS2_rendition_1E-8_downsampled_try3_peak_1769	363	14.6995	36.3834	33.6913	97
chr1	108613886	108614129	Project004-IPSHOCH-Exp5-ChIP-ES-2i-CTCF-IP-Blobel-Rep2-S1_S9_MACS2_rendition_1E-8_downsampled_try3_peak_1770	424	15.7186	42.4807	39.7084	104
chr1	108632148	108632517	Project004-IPSHOCH-Exp5-ChIP-ES-2i-CTCF-IP-Blobel-Rep2-S1_S9_MACS2_rendition_1E-8_downsampled_try3_peak_1771	945	29.8073	94.5116	91.0331	236
chr1	108634675	108634999	Project004-IPSHOCH-Exp5-ChIP-ES-2i-CTCF-IP-Blobel-Rep2-S1_S9_MACS2_rendition_1E-8_downsampled_try3_peak_1772	661	22.7027	66.1629	63.0818	151
chr1	108696589	108696794	Project004-IPSHOCH-Exp5-ChIP-ES-2i-CTCF-IP-Blobel-Rep2-S1_S9_MACS2_rendition_1E-8_downsampled_try3_peak_1773	267	13.1988	26.7789	24.2164	106
chr1	108714994	108715255	Project004-IPSHOCH-Exp5-ChIP-ES-2i-CTCF-IP-Blobel-Rep2-S1_S9_MACS2_rendition_1E-8_downsampled_try3_peak_1774	304	10.1695	30.4589	27.8476	125
chr1	108780540	108780736	Project004-IPSHOCH-Exp5-ChIP-ES-2i-CTCF-IP-Blobel-Rep2-S1_S9_MACS2_rendition_1E-8_downsampled_try3_peak_1775	164	8.55578	16.412	14.0239	95
chr1	108797997	108798364	Project004-IPSHOCH-Exp5-ChIP-ES-2i-CTCF-IP-Blobel-Rep2-S1_S9_MACS2_rendition_1E-8_downsampled_try3_peak_1776	566	17.5	56.6146	53.6626	248
chr1	108857695	108858044	Project004-IPSHOCH-Exp5-ChIP-ES-2i-CTCF-IP-Blobel-Rep2-S1_S9_MACS2_rendition_1E-8_downsampled_try3_peak_1777	447	17.027	44.7837	41.9846	128
chr1	108865808	108865980	Project004-IPSHOCH-Exp5-ChIP-ES-2i-CTCF-IP-Blobel-Rep2-S1_S9_MACS2_rendition_1E-8_downsampled_try3_peak_1778	145	7.7027	14.5288	12.1727	33
chr1	108911120	108911405	Project004-IPSHOCH-Exp5-ChIP-ES-2i-CTCF-IP-Blobel-Rep2-S1_S9_MACS2_rendition_1E-8_downsampled_try3_peak_1779	401	11.1429	40.1258	37.389	133
chr1	109024073	109024355	Project004-IPSHOCH-Exp5-ChIP-ES-2i-CTCF-IP-Blobel-Rep2-S1_S9_MACS2_rendition_1E-8_downsampled_try3_peak_1780	482	19.9681	48.2811	45.4378	155
chr1	109139829	109140100	Project004-IPSHOCH-Exp5-ChIP-ES-2i-CTCF-IP-Blobel-Rep2-S1_S9_MACS2_rendition_1E-8_downsampled_try3_peak_1781	737	26.0541	73.7594	70.5809	135
chr1	109249640	109250004	Project004-IPSHOCH-Exp5-ChIP-ES-2i-CTCF-IP-Blobel-Rep2-S1_S9_MACS2_rendition_1E-8_downsampled_try3_peak_1782	797	30.0932	79.7598	76.495	169
chr1	109378112	109378452	Project004-IPSHOCH-Exp5-ChIP-ES-2i-CTCF-IP-Blobel-Rep2-S1_S9_MACS2_rendition_1E-8_downsampled_try3_peak_1783	755	19.0678	75.5994	72.3917	198
chr1	109490155	109490336	Project004-IPSHOCH-Exp5-ChIP-ES-2i-CTCF-IP-Blobel-Rep2-S1_S9_MACS2_rendition_1E-8_downsampled_try3_peak_1784	197	10.559	19.7277	17.2736	71
chr1	109495125	109495378	Project004-IPSHOCH-Exp5-ChIP-ES-2i-CTCF-IP-Blobel-Rep2-S1_S9_MACS2_rendition_1E-8_downsampled_try3_peak_1785	329	14.6595	32.9222	30.2753	128
chr1	109532547	109532720	Project004-IPSHOCH-Exp5-ChIP-ES-2i-CTCF-IP-Blobel-Rep2-S1_S9_MACS2_rendition_1E-8_downsampled_try3_peak_1786	224	11.6149	22.4912	19.9952	80
chr1	110273344	110273525	Project004-IPSHOCH-Exp5-ChIP-ES-2i-CTCF-IP-Blobel-Rep2-S1_S9_MACS2_rendition_1E-8_downsampled_try3_peak_1787	197	10.559	19.7277	17.2736	108
chr1	110667256	110667414	Project004-IPSHOCH-Exp5-ChIP-ES-2i-CTCF-IP-Blobel-Rep2-S1_S9_MACS2_rendition_1E-8_downsampled_try3_peak_1788	197	10.559	19.7277	17.2736	52
chr1	110721465	110721696	Project004-IPSHOCH-Exp5-ChIP-ES-2i-CTCF-IP-Blobel-Rep2-S1_S9_MACS2_rendition_1E-8_downsampled_try3_peak_1789	293	12.5676	29.3754	26.7781	122
chr1	110723904	110724185	Project004-IPSHOCH-Exp5-ChIP-ES-2i-CTCF-IP-Blobel-Rep2-S1_S9_MACS2_rendition_1E-8_downsampled_try3_peak_1790	420	18.4783	42.0928	39.3241	140
chr1	110769096	110769354	Project004-IPSHOCH-Exp5-ChIP-ES-2i-CTCF-IP-Blobel-Rep2-S1_S9_MACS2_rendition_1E-8_downsampled_try3_peak_1791	239	12.1429	23.9023	21.3845	129
chr1	110977973	110978203	Project004-IPSHOCH-Exp5-ChIP-ES-2i-CTCF-IP-Blobel-Rep2-S1_S9_MACS2_rendition_1E-8_downsampled_try3_peak_1792	239	12.1429	23.9023	21.3845	116
chr1	111731239	111731481	Project004-IPSHOCH-Exp5-ChIP-ES-2i-CTCF-IP-Blobel-Rep2-S1_S9_MACS2_rendition_1E-8_downsampled_try3_peak_1793	477	17.8378	47.7286	44.8901	123
chr1	111882117	111882396	Project004-IPSHOCH-Exp5-ChIP-ES-2i-CTCF-IP-Blobel-Rep2-S1_S9_MACS2_rendition_1E-8_downsampled_try3_peak_1794	462	17.4324	46.2512	43.4318	143
chr1	112430258	112430457	Project004-IPSHOCH-Exp5-ChIP-ES-2i-CTCF-IP-Blobel-Rep2-S1_S9_MACS2_rendition_1E-8_downsampled_try3_peak_1795	280	12.1622	28.0497	25.4722	94
chr1	113139044	113139285	Project004-IPSHOCH-Exp5-ChIP-ES-2i-CTCF-IP-Blobel-Rep2-S1_S9_MACS2_rendition_1E-8_downsampled_try3_peak_1796	282	13.7267	28.2431	25.6591	107
chr1	113530751	113530969	Project004-IPSHOCH-Exp5-ChIP-ES-2i-CTCF-IP-Blobel-Rep2-S1_S9_MACS2_rendition_1E-8_downsampled_try3_peak_1797	342	15.8385	34.2574	31.5934	132
chr1	113556856	113557229	Project004-IPSHOCH-Exp5-ChIP-ES-2i-CTCF-IP-Blobel-Rep2-S1_S9_MACS2_rendition_1E-8_downsampled_try3_peak_1798	655	25.8696	65.5462	62.4743	162
chr1	113739313	113739613	Project004-IPSHOCH-Exp5-ChIP-ES-2i-CTCF-IP-Blobel-Rep2-S1_S9_MACS2_rendition_1E-8_downsampled_try3_peak_1799	524	16.5625	52.4199	49.5206	162
chr1	113760568	113760936	Project004-IPSHOCH-Exp5-ChIP-ES-2i-CTCF-IP-Blobel-Rep2-S1_S9_MACS2_rendition_1E-8_downsampled_try3_peak_1800	681	20	68.1289	65.0212	137
chr1	114143219	114143402	Project004-IPSHOCH-Exp5-ChIP-ES-2i-CTCF-IP-Blobel-Rep2-S1_S9_MACS2_rendition_1E-8_downsampled_try3_peak_1801	157	8.97516	15.7436	13.3619	105
chr1	114275277	114275643	Project004-IPSHOCH-Exp5-ChIP-ES-2i-CTCF-IP-Blobel-Rep2-S1_S9_MACS2_rendition_1E-8_downsampled_try3_peak_1802	867	26.5719	86.7958	83.433	194
chr1	114276515	114276899	Project004-IPSHOCH-Exp5-ChIP-ES-2i-CTCF-IP-Blobel-Rep2-S1_S9_MACS2_rendition_1E-8_downsampled_try3_peak_1803	1290	43.8199	129.014	125.014	158
chr1	114285390	114285738	Project004-IPSHOCH-Exp5-ChIP-ES-2i-CTCF-IP-Blobel-Rep2-S1_S9_MACS2_rendition_1E-8_downsampled_try3_peak_1804	807	26.3514	80.732	77.4509	151
chr1	114348279	114348585	Project004-IPSHOCH-Exp5-ChIP-ES-2i-CTCF-IP-Blobel-Rep2-S1_S9_MACS2_rendition_1E-8_downsampled_try3_peak_1805	390	15.4054	39.0183	36.2879	194
chr1	114349112	114349302	Project004-IPSHOCH-Exp5-ChIP-ES-2i-CTCF-IP-Blobel-Rep2-S1_S9_MACS2_rendition_1E-8_downsampled_try3_peak_1806	241	10.9459	24.1597	21.6374	69
chr1	114350053	114350306	Project004-IPSHOCH-Exp5-ChIP-ES-2i-CTCF-IP-Blobel-Rep2-S1_S9_MACS2_rendition_1E-8_downsampled_try3_peak_1807	365	16.4316	36.569	33.8743	147
chr1	114352692	114352953	Project004-IPSHOCH-Exp5-ChIP-ES-2i-CTCF-IP-Blobel-Rep2-S1_S9_MACS2_rendition_1E-8_downsampled_try3_peak_1808	709	23.9189	70.9547	67.8104	132
chr1	114600597	114600841	Project004-IPSHOCH-Exp5-ChIP-ES-2i-CTCF-IP-Blobel-Rep2-S1_S9_MACS2_rendition_1E-8_downsampled_try3_peak_1809	253	12.6708	25.3317	22.7939	121
chr1	114771356	114771586	Project004-IPSHOCH-Exp5-ChIP-ES-2i-CTCF-IP-Blobel-Rep2-S1_S9_MACS2_rendition_1E-8_downsampled_try3_peak_1810	254	11.3514	25.4413	22.8977	107
chr1	115124657	115124850	Project004-IPSHOCH-Exp5-ChIP-ES-2i-CTCF-IP-Blobel-Rep2-S1_S9_MACS2_rendition_1E-8_downsampled_try3_peak_1811	197	10.559	19.7277	17.2736	110
chr1	115143975	115144282	Project004-IPSHOCH-Exp5-ChIP-ES-2i-CTCF-IP-Blobel-Rep2-S1_S9_MACS2_rendition_1E-8_downsampled_try3_peak_1812	779	29.5652	77.9552	74.7149	153
chr1	115734487	115734705	Project004-IPSHOCH-Exp5-ChIP-ES-2i-CTCF-IP-Blobel-Rep2-S1_S9_MACS2_rendition_1E-8_downsampled_try3_peak_1813	267	13.1988	26.7789	24.2164	108
chr1	115997394	115997565	Project004-IPSHOCH-Exp5-ChIP-ES-2i-CTCF-IP-Blobel-Rep2-S1_S9_MACS2_rendition_1E-8_downsampled_try3_peak_1814	197	10.559	19.7277	17.2736	80
chr1	116858485	116858854	Project004-IPSHOCH-Exp5-ChIP-ES-2i-CTCF-IP-Blobel-Rep2-S1_S9_MACS2_rendition_1E-8_downsampled_try3_peak_1815	833	31.1491	83.3915	80.0737	219
chr1	117430407	117430572	Project004-IPSHOCH-Exp5-ChIP-ES-2i-CTCF-IP-Blobel-Rep2-S1_S9_MACS2_rendition_1E-8_downsampled_try3_peak_1816	168	8.51351	16.8225	14.4247	95
chr1	117583138	117583365	Project004-IPSHOCH-Exp5-ChIP-ES-2i-CTCF-IP-Blobel-Rep2-S1_S9_MACS2_rendition_1E-8_downsampled_try3_peak_1817	404	17.9503	40.4998	37.7504	90
chr1	118023803	118023965	Project004-IPSHOCH-Exp5-ChIP-ES-2i-CTCF-IP-Blobel-Rep2-S1_S9_MACS2_rendition_1E-8_downsampled_try3_peak_1818	119	7.3913	11.9826	9.68727	76
chr1	118209880	118210149	Project004-IPSHOCH-Exp5-ChIP-ES-2i-CTCF-IP-Blobel-Rep2-S1_S9_MACS2_rendition_1E-8_downsampled_try3_peak_1819	741	24.7297	74.1858	70.9967	149
chr1	118291449	118291601	Project004-IPSHOCH-Exp5-ChIP-ES-2i-CTCF-IP-Blobel-Rep2-S1_S9_MACS2_rendition_1E-8_downsampled_try3_peak_1820	197	10.559	19.7277	17.2736	101
chr1	118314194	118314346	Project004-IPSHOCH-Exp5-ChIP-ES-2i-CTCF-IP-Blobel-Rep2-S1_S9_MACS2_rendition_1E-8_downsampled_try3_peak_1821	132	7.91925	13.209	10.8855	106
chr1	118374227	118374639	Project004-IPSHOCH-Exp5-ChIP-ES-2i-CTCF-IP-Blobel-Rep2-S1_S9_MACS2_rendition_1E-8_downsampled_try3_peak_1822	807	26.3514	80.732	77.4509	250
chr1	119251236	119251556	Project004-IPSHOCH-Exp5-ChIP-ES-2i-CTCF-IP-Blobel-Rep2-S1_S9_MACS2_rendition_1E-8_downsampled_try3_peak_1823	1019	36.4286	101.97	98.3816	188
chr1	119275749	119275948	Project004-IPSHOCH-Exp5-ChIP-ES-2i-CTCF-IP-Blobel-Rep2-S1_S9_MACS2_rendition_1E-8_downsampled_try3_peak_1824	248	8.8983	24.8937	22.3625	141
chr1	119309011	119309258	Project004-IPSHOCH-Exp5-ChIP-ES-2i-CTCF-IP-Blobel-Rep2-S1_S9_MACS2_rendition_1E-8_downsampled_try3_peak_1825	326	11.875	32.6367	29.9974	131
chr1	119393281	119393433	Project004-IPSHOCH-Exp5-ChIP-ES-2i-CTCF-IP-Blobel-Rep2-S1_S9_MACS2_rendition_1E-8_downsampled_try3_peak_1826	124	7.18735	12.4041	10.1004	59
chr1	119416155	119416436	Project004-IPSHOCH-Exp5-ChIP-ES-2i-CTCF-IP-Blobel-Rep2-S1_S9_MACS2_rendition_1E-8_downsampled_try3_peak_1827	507	18.6486	50.7125	47.8363	134
chr1	119909468	119909634	Project004-IPSHOCH-Exp5-ChIP-ES-2i-CTCF-IP-Blobel-Rep2-S1_S9_MACS2_rendition_1E-8_downsampled_try3_peak_1828	293	12.5676	29.3754	26.7781	94
chr1	120171759	120172062	Project004-IPSHOCH-Exp5-ChIP-ES-2i-CTCF-IP-Blobel-Rep2-S1_S9_MACS2_rendition_1E-8_downsampled_try3_peak_1829	740	21.25	74.0511	70.8668	175
chr1	120217225	120217746	Project004-IPSHOCH-Exp5-ChIP-ES-2i-CTCF-IP-Blobel-Rep2-S1_S9_MACS2_rendition_1E-8_downsampled_try3_peak_1830	1459	42.7789	145.912	141.648	251
chr1	120218008	120218463	Project004-IPSHOCH-Exp5-ChIP-ES-2i-CTCF-IP-Blobel-Rep2-S1_S9_MACS2_rendition_1E-8_downsampled_try3_peak_1831	743	15.5556	74.3582	71.1667	319
chr1	120264534	120264866	Project004-IPSHOCH-Exp5-ChIP-ES-2i-CTCF-IP-Blobel-Rep2-S1_S9_MACS2_rendition_1E-8_downsampled_try3_peak_1832	891	32.3497	89.1787	85.7783	151
chr1	120270808	120271065	Project004-IPSHOCH-Exp5-ChIP-ES-2i-CTCF-IP-Blobel-Rep2-S1_S9_MACS2_rendition_1E-8_downsampled_try3_peak_1833	183	9.4334	18.3567	15.9336	109
chr1	120275173	120275500	Project004-IPSHOCH-Exp5-ChIP-ES-2i-CTCF-IP-Blobel-Rep2-S1_S9_MACS2_rendition_1E-8_downsampled_try3_peak_1834	132	7.91925	13.209	10.8855	121
chr1	120362680	120362985	Project004-IPSHOCH-Exp5-ChIP-ES-2i-CTCF-IP-Blobel-Rep2-S1_S9_MACS2_rendition_1E-8_downsampled_try3_peak_1835	617	16.5254	61.792	58.7709	118
chr1	120373539	120373819	Project004-IPSHOCH-Exp5-ChIP-ES-2i-CTCF-IP-Blobel-Rep2-S1_S9_MACS2_rendition_1E-8_downsampled_try3_peak_1836	591	16.017	59.107	56.1212	148
chr1	120389490	120389683	Project004-IPSHOCH-Exp5-ChIP-ES-2i-CTCF-IP-Blobel-Rep2-S1_S9_MACS2_rendition_1E-8_downsampled_try3_peak_1837	311	9.42857	31.1522	28.5342	101
chr1	120394912	120395253	Project004-IPSHOCH-Exp5-ChIP-ES-2i-CTCF-IP-Blobel-Rep2-S1_S9_MACS2_rendition_1E-8_downsampled_try3_peak_1838	712	16.5	71.2845	68.1339	150
chr1	120402406	120402668	Project004-IPSHOCH-Exp5-ChIP-ES-2i-CTCF-IP-Blobel-Rep2-S1_S9_MACS2_rendition_1E-8_downsampled_try3_peak_1839	447	17.027	44.7837	41.9846	121
chr1	120425870	120426195	Project004-IPSHOCH-Exp5-ChIP-ES-2i-CTCF-IP-Blobel-Rep2-S1_S9_MACS2_rendition_1E-8_downsampled_try3_peak_1840	614	21.4865	61.4404	58.4249	174
chr1	120461171	120461491	Project004-IPSHOCH-Exp5-ChIP-ES-2i-CTCF-IP-Blobel-Rep2-S1_S9_MACS2_rendition_1E-8_downsampled_try3_peak_1841	778	27.9004	77.8364	74.5993	173
chr1	120524300	120524533	Project004-IPSHOCH-Exp5-ChIP-ES-2i-CTCF-IP-Blobel-Rep2-S1_S9_MACS2_rendition_1E-8_downsampled_try3_peak_1842	231	6.40777	23.1028	20.5958	117
chr1	120587299	120587526	Project004-IPSHOCH-Exp5-ChIP-ES-2i-CTCF-IP-Blobel-Rep2-S1_S9_MACS2_rendition_1E-8_downsampled_try3_peak_1843	244	11.8222	24.4771	21.9498	111
chr1	120656226	120656469	Project004-IPSHOCH-Exp5-ChIP-ES-2i-CTCF-IP-Blobel-Rep2-S1_S9_MACS2_rendition_1E-8_downsampled_try3_peak_1844	411	12.4576	41.1311	38.3776	110
chr1	120665447	120665769	Project004-IPSHOCH-Exp5-ChIP-ES-2i-CTCF-IP-Blobel-Rep2-S1_S9_MACS2_rendition_1E-8_downsampled_try3_peak_1845	924	29.1892	92.4393	88.9923	150
chr1	120668894	120669259	Project004-IPSHOCH-Exp5-ChIP-ES-2i-CTCF-IP-Blobel-Rep2-S1_S9_MACS2_rendition_1E-8_downsampled_try3_peak_1846	846	23.4375	84.6556	81.3202	194
chr1	120718756	120719204	Project004-IPSHOCH-Exp5-ChIP-ES-2i-CTCF-IP-Blobel-Rep2-S1_S9_MACS2_rendition_1E-8_downsampled_try3_peak_1847	831	23.125	83.1228	79.8094	276
chr1	120866751	120866924	Project004-IPSHOCH-Exp5-ChIP-ES-2i-CTCF-IP-Blobel-Rep2-S1_S9_MACS2_rendition_1E-8_downsampled_try3_peak_1848	204	10.7219	20.4908	18.0275	60
chr1	120918632	120918906	Project004-IPSHOCH-Exp5-ChIP-ES-2i-CTCF-IP-Blobel-Rep2-S1_S9_MACS2_rendition_1E-8_downsampled_try3_peak_1849	208	8.75	20.8176	18.3492	113
chr1	120950125	120950443	Project004-IPSHOCH-Exp5-ChIP-ES-2i-CTCF-IP-Blobel-Rep2-S1_S9_MACS2_rendition_1E-8_downsampled_try3_peak_1850	1187	29.3343	118.783	114.942	164
chr1	120971458	120971804	Project004-IPSHOCH-Exp5-ChIP-ES-2i-CTCF-IP-Blobel-Rep2-S1_S9_MACS2_rendition_1E-8_downsampled_try3_peak_1851	943	22.3729	94.3999	90.9254	194
chr1	120979083	120979618	Project004-IPSHOCH-Exp5-ChIP-ES-2i-CTCF-IP-Blobel-Rep2-S1_S9_MACS2_rendition_1E-8_downsampled_try3_peak_1852	779	23.785	77.964	74.7237	313
chr1	120980251	120980578	Project004-IPSHOCH-Exp5-ChIP-ES-2i-CTCF-IP-Blobel-Rep2-S1_S9_MACS2_rendition_1E-8_downsampled_try3_peak_1853	864	25.867	86.4597	83.0996	183
chr1	120984151	120984438	Project004-IPSHOCH-Exp5-ChIP-ES-2i-CTCF-IP-Blobel-Rep2-S1_S9_MACS2_rendition_1E-8_downsampled_try3_peak_1854	790	25.9459	79.0852	75.8275	132
chr1	120990319	120990651	Project004-IPSHOCH-Exp5-ChIP-ES-2i-CTCF-IP-Blobel-Rep2-S1_S9_MACS2_rendition_1E-8_downsampled_try3_peak_1855	939	26.2773	93.921	90.4581	136
chr1	120991520	120991687	Project004-IPSHOCH-Exp5-ChIP-ES-2i-CTCF-IP-Blobel-Rep2-S1_S9_MACS2_rendition_1E-8_downsampled_try3_peak_1856	186	8.9825	18.6158	16.1853	92
chr1	121016468	121016799	Project004-IPSHOCH-Exp5-ChIP-ES-2i-CTCF-IP-Blobel-Rep2-S1_S9_MACS2_rendition_1E-8_downsampled_try3_peak_1857	608	18.4375	60.8783	57.8679	157
chr1	121050299	121050626	Project004-IPSHOCH-Exp5-ChIP-ES-2i-CTCF-IP-Blobel-Rep2-S1_S9_MACS2_rendition_1E-8_downsampled_try3_peak_1858	442	14.6875	44.2539	41.4596	95
chr1	121056956	121057213	Project004-IPSHOCH-Exp5-ChIP-ES-2i-CTCF-IP-Blobel-Rep2-S1_S9_MACS2_rendition_1E-8_downsampled_try3_peak_1859	462	17.4324	46.2512	43.4318	137
chr1	121106079	121106332	Project004-IPSHOCH-Exp5-ChIP-ES-2i-CTCF-IP-Blobel-Rep2-S1_S9_MACS2_rendition_1E-8_downsampled_try3_peak_1860	293	12.5676	29.3754	26.7781	125
chr1	121152730	121153006	Project004-IPSHOCH-Exp5-ChIP-ES-2i-CTCF-IP-Blobel-Rep2-S1_S9_MACS2_rendition_1E-8_downsampled_try3_peak_1861	442	14.6875	44.2539	41.4596	138
chr1	121241887	121242379	Project004-IPSHOCH-Exp5-ChIP-ES-2i-CTCF-IP-Blobel-Rep2-S1_S9_MACS2_rendition_1E-8_downsampled_try3_peak_1862	1074	22.0714	107.453	103.788	265
chr1	121247411	121247599	Project004-IPSHOCH-Exp5-ChIP-ES-2i-CTCF-IP-Blobel-Rep2-S1_S9_MACS2_rendition_1E-8_downsampled_try3_peak_1863	209	10.0279	20.9156	18.4459	112
chr1	121251708	121251871	Project004-IPSHOCH-Exp5-ChIP-ES-2i-CTCF-IP-Blobel-Rep2-S1_S9_MACS2_rendition_1E-8_downsampled_try3_peak_1864	179	8.91892	17.9999	15.579	96
chr1	121319365	121319550	Project004-IPSHOCH-Exp5-ChIP-ES-2i-CTCF-IP-Blobel-Rep2-S1_S9_MACS2_rendition_1E-8_downsampled_try3_peak_1865	124	6.94142	12.4056	10.1014	78
chr1	121320164	121320539	Project004-IPSHOCH-Exp5-ChIP-ES-2i-CTCF-IP-Blobel-Rep2-S1_S9_MACS2_rendition_1E-8_downsampled_try3_peak_1866	821	16.6667	82.1506	78.8528	193
chr1	121340652	121340847	Project004-IPSHOCH-Exp5-ChIP-ES-2i-CTCF-IP-Blobel-Rep2-S1_S9_MACS2_rendition_1E-8_downsampled_try3_peak_1867	279	8.78571	27.9421	25.3683	108
chr1	121354797	121355145	Project004-IPSHOCH-Exp5-ChIP-ES-2i-CTCF-IP-Blobel-Rep2-S1_S9_MACS2_rendition_1E-8_downsampled_try3_peak_1868	777	25.7241	77.768	74.5318	192
chr1	121359959	121360327	Project004-IPSHOCH-Exp5-ChIP-ES-2i-CTCF-IP-Blobel-Rep2-S1_S9_MACS2_rendition_1E-8_downsampled_try3_peak_1869	741	24.7297	74.1858	70.9967	201
chr1	121378179	121378481	Project004-IPSHOCH-Exp5-ChIP-ES-2i-CTCF-IP-Blobel-Rep2-S1_S9_MACS2_rendition_1E-8_downsampled_try3_peak_1870	538	15	53.8199	50.8997	150
chr1	121379582	121379756	Project004-IPSHOCH-Exp5-ChIP-ES-2i-CTCF-IP-Blobel-Rep2-S1_S9_MACS2_rendition_1E-8_downsampled_try3_peak_1871	242	9.6875	24.2245	21.699	105
chr1	121381071	121381391	Project004-IPSHOCH-Exp5-ChIP-ES-2i-CTCF-IP-Blobel-Rep2-S1_S9_MACS2_rendition_1E-8_downsampled_try3_peak_1872	1057	31.634	105.777	102.135	171
chr1	121390974	121391233	Project004-IPSHOCH-Exp5-ChIP-ES-2i-CTCF-IP-Blobel-Rep2-S1_S9_MACS2_rendition_1E-8_downsampled_try3_peak_1873	550	20.6983	55.0626	52.1345	142
chr1	121437032	121437281	Project004-IPSHOCH-Exp5-ChIP-ES-2i-CTCF-IP-Blobel-Rep2-S1_S9_MACS2_rendition_1E-8_downsampled_try3_peak_1874	433	16.6216	43.3264	40.5461	111
chr1	121445202	121445709	Project004-IPSHOCH-Exp5-ChIP-ES-2i-CTCF-IP-Blobel-Rep2-S1_S9_MACS2_rendition_1E-8_downsampled_try3_peak_1875	1174	38.3039	117.423	113.601	239
chr1	121538994	121539239	Project004-IPSHOCH-Exp5-ChIP-ES-2i-CTCF-IP-Blobel-Rep2-S1_S9_MACS2_rendition_1E-8_downsampled_try3_peak_1876	507	18.6486	50.7125	47.8363	123
chr1	121550968	121551235	Project004-IPSHOCH-Exp5-ChIP-ES-2i-CTCF-IP-Blobel-Rep2-S1_S9_MACS2_rendition_1E-8_downsampled_try3_peak_1877	433	18.3682	43.3386	40.5583	138
chr1	121571631	121572000	Project004-IPSHOCH-Exp5-ChIP-ES-2i-CTCF-IP-Blobel-Rep2-S1_S9_MACS2_rendition_1E-8_downsampled_try3_peak_1878	822	29.9521	82.2654	78.9661	150
chr1	121582371	121582770	Project004-IPSHOCH-Exp5-ChIP-ES-2i-CTCF-IP-Blobel-Rep2-S1_S9_MACS2_rendition_1E-8_downsampled_try3_peak_1879	210	11.087	21.0994	18.6237	311
chr1	121668617	121668847	Project004-IPSHOCH-Exp5-ChIP-ES-2i-CTCF-IP-Blobel-Rep2-S1_S9_MACS2_rendition_1E-8_downsampled_try3_peak_1880	186	8.125	18.6213	16.1884	86
chr1	121703287	121703439	Project004-IPSHOCH-Exp5-ChIP-ES-2i-CTCF-IP-Blobel-Rep2-S1_S9_MACS2_rendition_1E-8_downsampled_try3_peak_1881	155	8.83037	15.5042	13.135	64
chr1	121715348	121715581	Project004-IPSHOCH-Exp5-ChIP-ES-2i-CTCF-IP-Blobel-Rep2-S1_S9_MACS2_rendition_1E-8_downsampled_try3_peak_1882	390	15.4054	39.0183	36.2879	117
chr1	121791540	121791982	Project004-IPSHOCH-Exp5-ChIP-ES-2i-CTCF-IP-Blobel-Rep2-S1_S9_MACS2_rendition_1E-8_downsampled_try3_peak_1883	1676	42.7524	167.614	163.03	240
chr1	121815899	121816208	Project004-IPSHOCH-Exp5-ChIP-ES-2i-CTCF-IP-Blobel-Rep2-S1_S9_MACS2_rendition_1E-8_downsampled_try3_peak_1884	552	17.1875	55.2085	52.2758	135
chr1	121826409	121826678	Project004-IPSHOCH-Exp5-ChIP-ES-2i-CTCF-IP-Blobel-Rep2-S1_S9_MACS2_rendition_1E-8_downsampled_try3_peak_1885	453	19.5342	45.3151	42.5059	143
chr1	121835294	121835637	Project004-IPSHOCH-Exp5-ChIP-ES-2i-CTCF-IP-Blobel-Rep2-S1_S9_MACS2_rendition_1E-8_downsampled_try3_peak_1886	402	13.75	40.2917	37.5523	197
chr1	121862544	121862727	Project004-IPSHOCH-Exp5-ChIP-ES-2i-CTCF-IP-Blobel-Rep2-S1_S9_MACS2_rendition_1E-8_downsampled_try3_peak_1887	279	8.78571	27.9421	25.3683	73
chr1	121882565	121882717	Project004-IPSHOCH-Exp5-ChIP-ES-2i-CTCF-IP-Blobel-Rep2-S1_S9_MACS2_rendition_1E-8_downsampled_try3_peak_1888	208	10.3318	20.8859	18.4162	44
chr1	121894295	121894534	Project004-IPSHOCH-Exp5-ChIP-ES-2i-CTCF-IP-Blobel-Rep2-S1_S9_MACS2_rendition_1E-8_downsampled_try3_peak_1889	315	12.7246	31.585	28.9576	126
chr1	121909707	121910070	Project004-IPSHOCH-Exp5-ChIP-ES-2i-CTCF-IP-Blobel-Rep2-S1_S9_MACS2_rendition_1E-8_downsampled_try3_peak_1890	974	27.6345	97.4599	93.9409	199
chr1	121912855	121913117	Project004-IPSHOCH-Exp5-ChIP-ES-2i-CTCF-IP-Blobel-Rep2-S1_S9_MACS2_rendition_1E-8_downsampled_try3_peak_1891	600	20.6988	60.0525	57.0545	135
chr1	121915596	121915863	Project004-IPSHOCH-Exp5-ChIP-ES-2i-CTCF-IP-Blobel-Rep2-S1_S9_MACS2_rendition_1E-8_downsampled_try3_peak_1892	282	13.7267	28.2431	25.6591	110
chr1	121929531	121929985	Project004-IPSHOCH-Exp5-ChIP-ES-2i-CTCF-IP-Blobel-Rep2-S1_S9_MACS2_rendition_1E-8_downsampled_try3_peak_1893	1636	33.5593	163.621	159.096	228
chr1	121956664	121956816	Project004-IPSHOCH-Exp5-ChIP-ES-2i-CTCF-IP-Blobel-Rep2-S1_S9_MACS2_rendition_1E-8_downsampled_try3_peak_1894	183	10.0311	18.3771	15.9485	75
chr1	121990107	121990478	Project004-IPSHOCH-Exp5-ChIP-ES-2i-CTCF-IP-Blobel-Rep2-S1_S9_MACS2_rendition_1E-8_downsampled_try3_peak_1895	1774	52.9634	177.495	172.782	188
chr1	121994975	121995281	Project004-IPSHOCH-Exp5-ChIP-ES-2i-CTCF-IP-Blobel-Rep2-S1_S9_MACS2_rendition_1E-8_downsampled_try3_peak_1896	623	18.75	62.3143	59.2839	154
chr1	122002403	122002570	Project004-IPSHOCH-Exp5-ChIP-ES-2i-CTCF-IP-Blobel-Rep2-S1_S9_MACS2_rendition_1E-8_downsampled_try3_peak_1897	191	9.32432	19.1965	16.7542	88
chr1	122043717	122043938	Project004-IPSHOCH-Exp5-ChIP-ES-2i-CTCF-IP-Blobel-Rep2-S1_S9_MACS2_rendition_1E-8_downsampled_try3_peak_1898	302	13.4763	30.2825	27.6726	111
chr1	122050846	122051105	Project004-IPSHOCH-Exp5-ChIP-ES-2i-CTCF-IP-Blobel-Rep2-S1_S9_MACS2_rendition_1E-8_downsampled_try3_peak_1899	525	14.7458	52.516	49.6135	124
chr1	122051979	122052284	Project004-IPSHOCH-Exp5-ChIP-ES-2i-CTCF-IP-Blobel-Rep2-S1_S9_MACS2_rendition_1E-8_downsampled_try3_peak_1900	874	24.3756	87.4148	84.0404	133
chr1	122054266	122054571	Project004-IPSHOCH-Exp5-ChIP-ES-2i-CTCF-IP-Blobel-Rep2-S1_S9_MACS2_rendition_1E-8_downsampled_try3_peak_1901	603	23.313	60.3506	57.3508	137
chr1	122068389	122068679	Project004-IPSHOCH-Exp5-ChIP-ES-2i-CTCF-IP-Blobel-Rep2-S1_S9_MACS2_rendition_1E-8_downsampled_try3_peak_1902	376	13.125	37.6986	34.9866	156
chr1	122086931	122087120	Project004-IPSHOCH-Exp5-ChIP-ES-2i-CTCF-IP-Blobel-Rep2-S1_S9_MACS2_rendition_1E-8_downsampled_try3_peak_1903	179	8.91892	17.9999	15.579	96
chr1	122093760	122094101	Project004-IPSHOCH-Exp5-ChIP-ES-2i-CTCF-IP-Blobel-Rep2-S1_S9_MACS2_rendition_1E-8_downsampled_try3_peak_1904	1044	32.027	104.44	100.817	196
chr1	122127959	122128217	Project004-IPSHOCH-Exp5-ChIP-ES-2i-CTCF-IP-Blobel-Rep2-S1_S9_MACS2_rendition_1E-8_downsampled_try3_peak_1905	473	13.7288	47.376	44.5418	142
chr1	122133755	122133972	Project004-IPSHOCH-Exp5-ChIP-ES-2i-CTCF-IP-Blobel-Rep2-S1_S9_MACS2_rendition_1E-8_downsampled_try3_peak_1906	403	16.6208	40.3811	37.6401	120
chr1	122140617	122140909	Project004-IPSHOCH-Exp5-ChIP-ES-2i-CTCF-IP-Blobel-Rep2-S1_S9_MACS2_rendition_1E-8_downsampled_try3_peak_1907	349	15.4583	34.9293	32.2576	151
chr1	122149380	122149654	Project004-IPSHOCH-Exp5-ChIP-ES-2i-CTCF-IP-Blobel-Rep2-S1_S9_MACS2_rendition_1E-8_downsampled_try3_peak_1908	373	16.0782	37.3373	34.6379	147
chr1	122174331	122174572	Project004-IPSHOCH-Exp5-ChIP-ES-2i-CTCF-IP-Blobel-Rep2-S1_S9_MACS2_rendition_1E-8_downsampled_try3_peak_1909	254	11.3514	25.4413	22.8977	149
chr1	122186503	122186744	Project004-IPSHOCH-Exp5-ChIP-ES-2i-CTCF-IP-Blobel-Rep2-S1_S9_MACS2_rendition_1E-8_downsampled_try3_peak_1910	280	12.9009	28.0612	25.4837	111
chr1	122193580	122193815	Project004-IPSHOCH-Exp5-ChIP-ES-2i-CTCF-IP-Blobel-Rep2-S1_S9_MACS2_rendition_1E-8_downsampled_try3_peak_1911	485	20.5901	48.5837	45.7327	112
chr1	122224272	122224639	Project004-IPSHOCH-Exp5-ChIP-ES-2i-CTCF-IP-Blobel-Rep2-S1_S9_MACS2_rendition_1E-8_downsampled_try3_peak_1912	743	15.5556	74.3582	71.1667	171
chr1	122234617	122234851	Project004-IPSHOCH-Exp5-ChIP-ES-2i-CTCF-IP-Blobel-Rep2-S1_S9_MACS2_rendition_1E-8_downsampled_try3_peak_1913	510	21.1742	51.0929	48.2097	121
chr1	122236821	122237143	Project004-IPSHOCH-Exp5-ChIP-ES-2i-CTCF-IP-Blobel-Rep2-S1_S9_MACS2_rendition_1E-8_downsampled_try3_peak_1914	288	13.0271	28.8934	26.3054	202
chr1	122239003	122239288	Project004-IPSHOCH-Exp5-ChIP-ES-2i-CTCF-IP-Blobel-Rep2-S1_S9_MACS2_rendition_1E-8_downsampled_try3_peak_1915	594	18.125	59.4496	56.4592	149
chr1	122264693	122265127	Project004-IPSHOCH-Exp5-ChIP-ES-2i-CTCF-IP-Blobel-Rep2-S1_S9_MACS2_rendition_1E-8_downsampled_try3_peak_1916	1004	34.9441	100.411	96.8463	177
chr1	122365486	122365821	Project004-IPSHOCH-Exp5-ChIP-ES-2i-CTCF-IP-Blobel-Rep2-S1_S9_MACS2_rendition_1E-8_downsampled_try3_peak_1917	1238	36.4865	123.832	119.908	191
chr1	122445951	122446180	Project004-IPSHOCH-Exp5-ChIP-ES-2i-CTCF-IP-Blobel-Rep2-S1_S9_MACS2_rendition_1E-8_downsampled_try3_peak_1918	583	20.6757	58.3323	55.3559	129
chr1	122446833	122447148	Project004-IPSHOCH-Exp5-ChIP-ES-2i-CTCF-IP-Blobel-Rep2-S1_S9_MACS2_rendition_1E-8_downsampled_try3_peak_1919	646	21.8704	64.6942	61.6336	185
chr1	122463316	122463489	Project004-IPSHOCH-Exp5-ChIP-ES-2i-CTCF-IP-Blobel-Rep2-S1_S9_MACS2_rendition_1E-8_downsampled_try3_peak_1920	157	8.97516	15.7436	13.3619	42
chr1	122483064	122483434	Project004-IPSHOCH-Exp5-ChIP-ES-2i-CTCF-IP-Blobel-Rep2-S1_S9_MACS2_rendition_1E-8_downsampled_try3_peak_1921	1274	37.2973	127.422	123.444	151
chr1	122491174	122491426	Project004-IPSHOCH-Exp5-ChIP-ES-2i-CTCF-IP-Blobel-Rep2-S1_S9_MACS2_rendition_1E-8_downsampled_try3_peak_1922	695	20.3125	69.5996	66.4715	121
chr1	122525503	122525706	Project004-IPSHOCH-Exp5-ChIP-ES-2i-CTCF-IP-Blobel-Rep2-S1_S9_MACS2_rendition_1E-8_downsampled_try3_peak_1923	242	9.6875	24.2245	21.699	123
chr1	122536516	122536702	Project004-IPSHOCH-Exp5-ChIP-ES-2i-CTCF-IP-Blobel-Rep2-S1_S9_MACS2_rendition_1E-8_downsampled_try3_peak_1924	210	11.087	21.0994	18.6237	75
chr1	122564385	122564671	Project004-IPSHOCH-Exp5-ChIP-ES-2i-CTCF-IP-Blobel-Rep2-S1_S9_MACS2_rendition_1E-8_downsampled_try3_peak_1925	630	21.8919	63.0066	59.971	145
chr1	122582533	122582756	Project004-IPSHOCH-Exp5-ChIP-ES-2i-CTCF-IP-Blobel-Rep2-S1_S9_MACS2_rendition_1E-8_downsampled_try3_peak_1926	420	18.4783	42.0928	39.3241	88
chr1	122594836	122595116	Project004-IPSHOCH-Exp5-ChIP-ES-2i-CTCF-IP-Blobel-Rep2-S1_S9_MACS2_rendition_1E-8_downsampled_try3_peak_1927	761	29.0373	76.1583	72.9404	138
chr1	122610523	122610754	Project004-IPSHOCH-Exp5-ChIP-ES-2i-CTCF-IP-Blobel-Rep2-S1_S9_MACS2_rendition_1E-8_downsampled_try3_peak_1928	154	7.1875	15.4506	13.0818	128
chr1	122691775	122692107	Project004-IPSHOCH-Exp5-ChIP-ES-2i-CTCF-IP-Blobel-Rep2-S1_S9_MACS2_rendition_1E-8_downsampled_try3_peak_1929	258	8.35714	25.8538	23.3069	208
chr1	122950366	122950656	Project004-IPSHOCH-Exp5-ChIP-ES-2i-CTCF-IP-Blobel-Rep2-S1_S9_MACS2_rendition_1E-8_downsampled_try3_peak_1930	569	23.2298	56.9428	53.9834	144
chr1	123076970	123077272	Project004-IPSHOCH-Exp5-ChIP-ES-2i-CTCF-IP-Blobel-Rep2-S1_S9_MACS2_rendition_1E-8_downsampled_try3_peak_1931	538	16.875	53.8102	50.8916	151
chr1	123085532	123085821	Project004-IPSHOCH-Exp5-ChIP-ES-2i-CTCF-IP-Blobel-Rep2-S1_S9_MACS2_rendition_1E-8_downsampled_try3_peak_1932	567	20.2703	56.7908	53.8352	167
chr1	123087559	123087724	Project004-IPSHOCH-Exp5-ChIP-ES-2i-CTCF-IP-Blobel-Rep2-S1_S9_MACS2_rendition_1E-8_downsampled_try3_peak_1933	132	7.91925	13.209	10.8855	87
chr1	123112467	123112749	Project004-IPSHOCH-Exp5-ChIP-ES-2i-CTCF-IP-Blobel-Rep2-S1_S9_MACS2_rendition_1E-8_downsampled_try3_peak_1934	758	25.1351	75.8121	72.599	143
chr1	123145672	123146022	Project004-IPSHOCH-Exp5-ChIP-ES-2i-CTCF-IP-Blobel-Rep2-S1_S9_MACS2_rendition_1E-8_downsampled_try3_peak_1935	567	20.2703	56.7908	53.8352	205
chr1	123286211	123286534	Project004-IPSHOCH-Exp5-ChIP-ES-2i-CTCF-IP-Blobel-Rep2-S1_S9_MACS2_rendition_1E-8_downsampled_try3_peak_1936	594	18.125	59.4496	56.4592	160
chr1	123296908	123297153	Project004-IPSHOCH-Exp5-ChIP-ES-2i-CTCF-IP-Blobel-Rep2-S1_S9_MACS2_rendition_1E-8_downsampled_try3_peak_1937	376	13.125	37.6986	34.9866	142
chr1	123315767	123316002	Project004-IPSHOCH-Exp5-ChIP-ES-2i-CTCF-IP-Blobel-Rep2-S1_S9_MACS2_rendition_1E-8_downsampled_try3_peak_1938	403	17.472	40.3891	37.6474	130
chr1	123337551	123338029	Project004-IPSHOCH-Exp5-ChIP-ES-2i-CTCF-IP-Blobel-Rep2-S1_S9_MACS2_rendition_1E-8_downsampled_try3_peak_1939	1196	34.7584	119.687	115.833	270
chr1	123346535	123346703	Project004-IPSHOCH-Exp5-ChIP-ES-2i-CTCF-IP-Blobel-Rep2-S1_S9_MACS2_rendition_1E-8_downsampled_try3_peak_1940	199	10.3679	19.9034	17.4479	88
chr1	123356723	123356912	Project004-IPSHOCH-Exp5-ChIP-ES-2i-CTCF-IP-Blobel-Rep2-S1_S9_MACS2_rendition_1E-8_downsampled_try3_peak_1941	134	6.5625	13.4274	11.0962	78
chr1	123386877	123387197	Project004-IPSHOCH-Exp5-ChIP-ES-2i-CTCF-IP-Blobel-Rep2-S1_S9_MACS2_rendition_1E-8_downsampled_try3_peak_1942	849	28.2341	84.9705	81.6315	136
chr1	123446070	123446369	Project004-IPSHOCH-Exp5-ChIP-ES-2i-CTCF-IP-Blobel-Rep2-S1_S9_MACS2_rendition_1E-8_downsampled_try3_peak_1943	486	13.9831	48.6494	45.7965	159
chr1	123464436	123464834	Project004-IPSHOCH-Exp5-ChIP-ES-2i-CTCF-IP-Blobel-Rep2-S1_S9_MACS2_rendition_1E-8_downsampled_try3_peak_1944	1230	30.9375	123.016	119.11	169
chr1	123481103	123481342	Project004-IPSHOCH-Exp5-ChIP-ES-2i-CTCF-IP-Blobel-Rep2-S1_S9_MACS2_rendition_1E-8_downsampled_try3_peak_1945	373	16.4736	37.3156	34.6168	105
chr1	123497595	123498089	Project004-IPSHOCH-Exp5-ChIP-ES-2i-CTCF-IP-Blobel-Rep2-S1_S9_MACS2_rendition_1E-8_downsampled_try3_peak_1946	1013	36.0496	101.318	97.7434	288
chr1	123501847	123502017	Project004-IPSHOCH-Exp5-ChIP-ES-2i-CTCF-IP-Blobel-Rep2-S1_S9_MACS2_rendition_1E-8_downsampled_try3_peak_1947	241	10.9459	24.1597	21.6374	74
chr1	123525424	123525716	Project004-IPSHOCH-Exp5-ChIP-ES-2i-CTCF-IP-Blobel-Rep2-S1_S9_MACS2_rendition_1E-8_downsampled_try3_peak_1948	455	15	45.5931	42.7806	171
chr1	123595624	123595782	Project004-IPSHOCH-Exp5-ChIP-ES-2i-CTCF-IP-Blobel-Rep2-S1_S9_MACS2_rendition_1E-8_downsampled_try3_peak_1949	224	11.6149	22.4912	19.9952	51
chr1	123604954	123605164	Project004-IPSHOCH-Exp5-ChIP-ES-2i-CTCF-IP-Blobel-Rep2-S1_S9_MACS2_rendition_1E-8_downsampled_try3_peak_1950	230	9.375	23.0745	20.5678	108
chr1	123695135	123695311	Project004-IPSHOCH-Exp5-ChIP-ES-2i-CTCF-IP-Blobel-Rep2-S1_S9_MACS2_rendition_1E-8_downsampled_try3_peak_1951	168	8.51351	16.8225	14.4247	116
chr1	123699946	123700237	Project004-IPSHOCH-Exp5-ChIP-ES-2i-CTCF-IP-Blobel-Rep2-S1_S9_MACS2_rendition_1E-8_downsampled_try3_peak_1952	630	21.8919	63.0066	59.971	145
chr1	123800646	123800926	Project004-IPSHOCH-Exp5-ChIP-ES-2i-CTCF-IP-Blobel-Rep2-S1_S9_MACS2_rendition_1E-8_downsampled_try3_peak_1953	373	16.8944	37.3519	34.6487	146
chr1	123904406	123904619	Project004-IPSHOCH-Exp5-ChIP-ES-2i-CTCF-IP-Blobel-Rep2-S1_S9_MACS2_rendition_1E-8_downsampled_try3_peak_1954	433	16.6216	43.3264	40.5461	109
chr1	124032666	124032833	Project004-IPSHOCH-Exp5-ChIP-ES-2i-CTCF-IP-Blobel-Rep2-S1_S9_MACS2_rendition_1E-8_downsampled_try3_peak_1955	170	9.50311	17.0487	14.6428	66
chr1	124066183	124066443	Project004-IPSHOCH-Exp5-ChIP-ES-2i-CTCF-IP-Blobel-Rep2-S1_S9_MACS2_rendition_1E-8_downsampled_try3_peak_1956	179	8.91892	17.9999	15.579	149
chr1	124248211	124248442	Project004-IPSHOCH-Exp5-ChIP-ES-2i-CTCF-IP-Blobel-Rep2-S1_S9_MACS2_rendition_1E-8_downsampled_try3_peak_1957	342	15.8385	34.2574	31.5934	114
chr1	124335978	124336272	Project004-IPSHOCH-Exp5-ChIP-ES-2i-CTCF-IP-Blobel-Rep2-S1_S9_MACS2_rendition_1E-8_downsampled_try3_peak_1958	710	20.625	71.0769	67.9279	161
chr1	124533558	124533725	Project004-IPSHOCH-Exp5-ChIP-ES-2i-CTCF-IP-Blobel-Rep2-S1_S9_MACS2_rendition_1E-8_downsampled_try3_peak_1959	228	10.5405	22.8938	20.3902	63
chr1	124886301	124886493	Project004-IPSHOCH-Exp5-ChIP-ES-2i-CTCF-IP-Blobel-Rep2-S1_S9_MACS2_rendition_1E-8_downsampled_try3_peak_1960	239	12.1429	23.9023	21.3845	74
chr1	124899931	124900200	Project004-IPSHOCH-Exp5-ChIP-ES-2i-CTCF-IP-Blobel-Rep2-S1_S9_MACS2_rendition_1E-8_downsampled_try3_peak_1961	502	21.118	50.2346	47.3624	118
chr1	125275110	125275271	Project004-IPSHOCH-Exp5-ChIP-ES-2i-CTCF-IP-Blobel-Rep2-S1_S9_MACS2_rendition_1E-8_downsampled_try3_peak_1962	224	11.6149	22.4912	19.9952	50
chr1	125310821	125311079	Project004-IPSHOCH-Exp5-ChIP-ES-2i-CTCF-IP-Blobel-Rep2-S1_S9_MACS2_rendition_1E-8_downsampled_try3_peak_1963	156	6.61017	15.6784	13.3037	149
chr1	125625941	125626093	Project004-IPSHOCH-Exp5-ChIP-ES-2i-CTCF-IP-Blobel-Rep2-S1_S9_MACS2_rendition_1E-8_downsampled_try3_peak_1964	170	9.50311	17.0487	14.6428	81
chr1	125871279	125871547	Project004-IPSHOCH-Exp5-ChIP-ES-2i-CTCF-IP-Blobel-Rep2-S1_S9_MACS2_rendition_1E-8_downsampled_try3_peak_1965	806	25.7759	80.6473	77.3711	114
chr1	125938206	125938475	Project004-IPSHOCH-Exp5-ChIP-ES-2i-CTCF-IP-Blobel-Rep2-S1_S9_MACS2_rendition_1E-8_downsampled_try3_peak_1966	404	15.8108	40.4434	37.6984	127
chr1	125999723	125999981	Project004-IPSHOCH-Exp5-ChIP-ES-2i-CTCF-IP-Blobel-Rep2-S1_S9_MACS2_rendition_1E-8_downsampled_try3_peak_1967	289	8.33333	28.9898	26.3989	124
chr1	126194991	126195252	Project004-IPSHOCH-Exp5-ChIP-ES-2i-CTCF-IP-Blobel-Rep2-S1_S9_MACS2_rendition_1E-8_downsampled_try3_peak_1968	774	25.5405	77.4452	74.2101	129
chr1	126346745	126347023	Project004-IPSHOCH-Exp5-ChIP-ES-2i-CTCF-IP-Blobel-Rep2-S1_S9_MACS2_rendition_1E-8_downsampled_try3_peak_1969	535	22.1739	53.5683	50.6563	140
chr1	126414263	126414415	Project004-IPSHOCH-Exp5-ChIP-ES-2i-CTCF-IP-Blobel-Rep2-S1_S9_MACS2_rendition_1E-8_downsampled_try3_peak_1970	200	10.4832	20.0947	17.6374	62
chr1	126453148	126453300	Project004-IPSHOCH-Exp5-ChIP-ES-2i-CTCF-IP-Blobel-Rep2-S1_S9_MACS2_rendition_1E-8_downsampled_try3_peak_1971	170	9.50311	17.0487	14.6428	95
chr1	126571062	126571333	Project004-IPSHOCH-Exp5-ChIP-ES-2i-CTCF-IP-Blobel-Rep2-S1_S9_MACS2_rendition_1E-8_downsampled_try3_peak_1972	507	18.6486	50.7125	47.8363	123
chr1	126614723	126615019	Project004-IPSHOCH-Exp5-ChIP-ES-2i-CTCF-IP-Blobel-Rep2-S1_S9_MACS2_rendition_1E-8_downsampled_try3_peak_1973	890	28.3784	89.0631	85.6641	148
chr1	127267298	127267768	Project004-IPSHOCH-Exp5-ChIP-ES-2i-CTCF-IP-Blobel-Rep2-S1_S9_MACS2_rendition_1E-8_downsampled_try3_peak_1974	815	22.8125	81.5958	78.3013	261
chr1	127279263	127279517	Project004-IPSHOCH-Exp5-ChIP-ES-2i-CTCF-IP-Blobel-Rep2-S1_S9_MACS2_rendition_1E-8_downsampled_try3_peak_1975	420	18.4783	42.0928	39.3241	149
chr1	127413881	127414123	Project004-IPSHOCH-Exp5-ChIP-ES-2i-CTCF-IP-Blobel-Rep2-S1_S9_MACS2_rendition_1E-8_downsampled_try3_peak_1976	464	17.9672	46.4092	43.5888	102
chr1	127415672	127415961	Project004-IPSHOCH-Exp5-ChIP-ES-2i-CTCF-IP-Blobel-Rep2-S1_S9_MACS2_rendition_1E-8_downsampled_try3_peak_1977	538	16.875	53.8102	50.8916	137
chr1	127442868	127443128	Project004-IPSHOCH-Exp5-ChIP-ES-2i-CTCF-IP-Blobel-Rep2-S1_S9_MACS2_rendition_1E-8_downsampled_try3_peak_1978	253	12.6708	25.3317	22.7939	150
chr1	127470835	127471221	Project004-IPSHOCH-Exp5-ChIP-ES-2i-CTCF-IP-Blobel-Rep2-S1_S9_MACS2_rendition_1E-8_downsampled_try3_peak_1979	661	22.7027	66.1629	63.0818	194
chr1	127478341	127478652	Project004-IPSHOCH-Exp5-ChIP-ES-2i-CTCF-IP-Blobel-Rep2-S1_S9_MACS2_rendition_1E-8_downsampled_try3_peak_1980	535	22.1739	53.5683	50.6563	167
chr1	127504068	127504354	Project004-IPSHOCH-Exp5-ChIP-ES-2i-CTCF-IP-Blobel-Rep2-S1_S9_MACS2_rendition_1E-8_downsampled_try3_peak_1981	1250	42.764	125.084	121.142	140
chr1	127543501	127543743	Project004-IPSHOCH-Exp5-ChIP-ES-2i-CTCF-IP-Blobel-Rep2-S1_S9_MACS2_rendition_1E-8_downsampled_try3_peak_1982	386	11.9491	38.6933	35.9754	135
chr1	127557562	127557758	Project004-IPSHOCH-Exp5-ChIP-ES-2i-CTCF-IP-Blobel-Rep2-S1_S9_MACS2_rendition_1E-8_downsampled_try3_peak_1983	327	15.3106	32.7313	30.0878	84
chr1	127565668	127565956	Project004-IPSHOCH-Exp5-ChIP-ES-2i-CTCF-IP-Blobel-Rep2-S1_S9_MACS2_rendition_1E-8_downsampled_try3_peak_1984	569	23.2298	56.9428	53.9834	115
chr1	127602013	127602380	Project004-IPSHOCH-Exp5-ChIP-ES-2i-CTCF-IP-Blobel-Rep2-S1_S9_MACS2_rendition_1E-8_downsampled_try3_peak_1985	376	13.125	37.6986	34.9866	143
chr1	127626234	127626599	Project004-IPSHOCH-Exp5-ChIP-ES-2i-CTCF-IP-Blobel-Rep2-S1_S9_MACS2_rendition_1E-8_downsampled_try3_peak_1986	1153	40.1242	115.353	111.564	138
chr1	127686402	127686686	Project004-IPSHOCH-Exp5-ChIP-ES-2i-CTCF-IP-Blobel-Rep2-S1_S9_MACS2_rendition_1E-8_downsampled_try3_peak_1987	583	14.3571	58.3241	55.3511	146
chr1	127807158	127807316	Project004-IPSHOCH-Exp5-ChIP-ES-2i-CTCF-IP-Blobel-Rep2-S1_S9_MACS2_rendition_1E-8_downsampled_try3_peak_1988	129	7.74665	12.9257	10.613	67
chr1	128184113	128184310	Project004-IPSHOCH-Exp5-ChIP-ES-2i-CTCF-IP-Blobel-Rep2-S1_S9_MACS2_rendition_1E-8_downsampled_try3_peak_1989	210	11.087	21.0994	18.6237	83
chr1	128304583	128304782	Project004-IPSHOCH-Exp5-ChIP-ES-2i-CTCF-IP-Blobel-Rep2-S1_S9_MACS2_rendition_1E-8_downsampled_try3_peak_1990	404	17.9503	40.4998	37.7504	117
chr1	128328300	128328460	Project004-IPSHOCH-Exp5-ChIP-ES-2i-CTCF-IP-Blobel-Rep2-S1_S9_MACS2_rendition_1E-8_downsampled_try3_peak_1991	239	12.1429	23.9023	21.3845	55
chr1	128328889	128329122	Project004-IPSHOCH-Exp5-ChIP-ES-2i-CTCF-IP-Blobel-Rep2-S1_S9_MACS2_rendition_1E-8_downsampled_try3_peak_1992	156	8.10811	15.6651	13.2917	123
chr1	128393306	128393709	Project004-IPSHOCH-Exp5-ChIP-ES-2i-CTCF-IP-Blobel-Rep2-S1_S9_MACS2_rendition_1E-8_downsampled_try3_peak_1993	769	28.4545	76.9568	73.7334	211
chr1	128465493	128465883	Project004-IPSHOCH-Exp5-ChIP-ES-2i-CTCF-IP-Blobel-Rep2-S1_S9_MACS2_rendition_1E-8_downsampled_try3_peak_1994	958	27.2891	95.8343	92.3424	167
chr1	128509531	128509810	Project004-IPSHOCH-Exp5-ChIP-ES-2i-CTCF-IP-Blobel-Rep2-S1_S9_MACS2_rendition_1E-8_downsampled_try3_peak_1995	665	25.4593	66.5471	63.4632	142
chr1	128623110	128623312	Project004-IPSHOCH-Exp5-ChIP-ES-2i-CTCF-IP-Blobel-Rep2-S1_S9_MACS2_rendition_1E-8_downsampled_try3_peak_1996	280	12.1622	28.0497	25.4722	91
chr1	128820182	128820392	Project004-IPSHOCH-Exp5-ChIP-ES-2i-CTCF-IP-Blobel-Rep2-S1_S9_MACS2_rendition_1E-8_downsampled_try3_peak_1997	293	12.5676	29.3754	26.7781	113
[truncated: 54,141 more rows]
