# Supplementary material for: YY1 and CTCF orchestrate a 3D chromatin looping switch during early neural lineage commitment
Source: HighWire-hosted journal article supplement (doi:10.1101/gr.215160.116), 2017-05-23
Supplement: Supplemental_Table_S6.xlsx [file Supplemental_Table_S6.xlsx]

## Sheet: ES-CTCF-IP-Blobel-Rep2-S1_S2_MA
Beagan et al. 2017
Table S6, Significant CTCF Peaks in ES cells in Serum Conditions
#chr	start	end	name	score	signalValue	pValue	qValue	peak
chr1	3002642	3002841	Project004-IPSHOCH-Exp5-ChIP-ES-CTCF-IP-Blobel-Rep2-S1_S2_MACS2_rendition_1E-8_downsampled_try3_peak_1	248	12.0435	24.8463	22.3158	126
chr1	3601385	3601548	Project004-IPSHOCH-Exp5-ChIP-ES-CTCF-IP-Blobel-Rep2-S1_S2_MACS2_rendition_1E-8_downsampled_try3_peak_2	165	9.18919	16.529	14.131	88
chr1	4132637	4132980	Project004-IPSHOCH-Exp5-ChIP-ES-CTCF-IP-Blobel-Rep2-S1_S2_MACS2_rendition_1E-8_downsampled_try3_peak_3	923	30.2393	92.3196	88.9479	162
chr1	4218321	4218633	Project004-IPSHOCH-Exp5-ChIP-ES-CTCF-IP-Blobel-Rep2-S1_S2_MACS2_rendition_1E-8_downsampled_try3_peak_4	280	12.1622	28.0497	25.4743	124
chr1	4287277	4287472	Project004-IPSHOCH-Exp5-ChIP-ES-CTCF-IP-Blobel-Rep2-S1_S2_MACS2_rendition_1E-8_downsampled_try3_peak_5	243	11.7724	24.3941	21.8729	117
chr1	4322604	4322896	Project004-IPSHOCH-Exp5-ChIP-ES-CTCF-IP-Blobel-Rep2-S1_S2_MACS2_rendition_1E-8_downsampled_try3_peak_6	606	23.994	60.6786	57.7043	139
chr1	4336265	4336667	Project004-IPSHOCH-Exp5-ChIP-ES-CTCF-IP-Blobel-Rep2-S1_S2_MACS2_rendition_1E-8_downsampled_try3_peak_7	1111	32.8905	111.107	107.472	179
chr1	4372942	4373230	Project004-IPSHOCH-Exp5-ChIP-ES-CTCF-IP-Blobel-Rep2-S1_S2_MACS2_rendition_1E-8_downsampled_try3_peak_8	344	10.0714	34.4499	31.7957	156
chr1	4406727	4407194	Project004-IPSHOCH-Exp5-ChIP-ES-CTCF-IP-Blobel-Rep2-S1_S2_MACS2_rendition_1E-8_downsampled_try3_peak_9	1002	26.5625	100.288	96.7991	260
chr1	4482005	4482434	Project004-IPSHOCH-Exp5-ChIP-ES-CTCF-IP-Blobel-Rep2-S1_S2_MACS2_rendition_1E-8_downsampled_try3_peak_10	454	16.1117	45.4281	42.6397	206
chr1	4506671	4507015	Project004-IPSHOCH-Exp5-ChIP-ES-CTCF-IP-Blobel-Rep2-S1_S2_MACS2_rendition_1E-8_downsampled_try3_peak_11	577	15.7627	57.7747	54.8369	162
chr1	4758427	4758868	Project004-IPSHOCH-Exp5-ChIP-ES-CTCF-IP-Blobel-Rep2-S1_S2_MACS2_rendition_1E-8_downsampled_try3_peak_12	1744	40.3125	174.472	169.879	213
chr1	4759884	4760322	Project004-IPSHOCH-Exp5-ChIP-ES-CTCF-IP-Blobel-Rep2-S1_S2_MACS2_rendition_1E-8_downsampled_try3_peak_13	1094	24.9153	109.434	105.817	261
chr1	4769479	4769734	Project004-IPSHOCH-Exp5-ChIP-ES-CTCF-IP-Blobel-Rep2-S1_S2_MACS2_rendition_1E-8_downsampled_try3_peak_14	124	6.98324	12.4747	10.1637	15
chr1	4770233	4770568	Project004-IPSHOCH-Exp5-ChIP-ES-CTCF-IP-Blobel-Rep2-S1_S2_MACS2_rendition_1E-8_downsampled_try3_peak_15	710	23.4932	71.0979	67.9916	154
chr1	4904493	4904758	Project004-IPSHOCH-Exp5-ChIP-ES-CTCF-IP-Blobel-Rep2-S1_S2_MACS2_rendition_1E-8_downsampled_try3_peak_16	191	9.32432	19.1965	16.75	119
chr1	5060347	5060675	Project004-IPSHOCH-Exp5-ChIP-ES-CTCF-IP-Blobel-Rep2-S1_S2_MACS2_rendition_1E-8_downsampled_try3_peak_17	466	17.2283	46.6612	43.8572	134
chr1	5089409	5089580	Project004-IPSHOCH-Exp5-ChIP-ES-CTCF-IP-Blobel-Rep2-S1_S2_MACS2_rendition_1E-8_downsampled_try3_peak_18	168	8.51351	16.8225	14.4184	74
chr1	5093286	5093574	Project004-IPSHOCH-Exp5-ChIP-ES-CTCF-IP-Blobel-Rep2-S1_S2_MACS2_rendition_1E-8_downsampled_try3_peak_19	433	16.6216	43.3264	40.5603	139
chr1	5128649	5128884	Project004-IPSHOCH-Exp5-ChIP-ES-CTCF-IP-Blobel-Rep2-S1_S2_MACS2_rendition_1E-8_downsampled_try3_peak_20	248	12.0435	24.8463	22.3158	109
chr1	5173610	5173948	Project004-IPSHOCH-Exp5-ChIP-ES-CTCF-IP-Blobel-Rep2-S1_S2_MACS2_rendition_1E-8_downsampled_try3_peak_21	999	35.2252	99.9038	96.4212	182
chr1	5894976	5895221	Project004-IPSHOCH-Exp5-ChIP-ES-CTCF-IP-Blobel-Rep2-S1_S2_MACS2_rendition_1E-8_downsampled_try3_peak_22	390	15.4054	39.0183	36.3047	138
chr1	5905426	5905712	Project004-IPSHOCH-Exp5-ChIP-ES-CTCF-IP-Blobel-Rep2-S1_S2_MACS2_rendition_1E-8_downsampled_try3_peak_23	652	19.375	65.2077	62.179	157
chr1	5907996	5908271	Project004-IPSHOCH-Exp5-ChIP-ES-CTCF-IP-Blobel-Rep2-S1_S2_MACS2_rendition_1E-8_downsampled_try3_peak_24	447	17.027	44.7837	42	140
chr1	6125211	6125520	Project004-IPSHOCH-Exp5-ChIP-ES-CTCF-IP-Blobel-Rep2-S1_S2_MACS2_rendition_1E-8_downsampled_try3_peak_25	770	21.875	77.0506	73.8727	139
chr1	6132255	6132488	Project004-IPSHOCH-Exp5-ChIP-ES-CTCF-IP-Blobel-Rep2-S1_S2_MACS2_rendition_1E-8_downsampled_try3_peak_26	204	10.7207	20.4889	18.022	125
chr1	6134035	6134414	Project004-IPSHOCH-Exp5-ChIP-ES-CTCF-IP-Blobel-Rep2-S1_S2_MACS2_rendition_1E-8_downsampled_try3_peak_27	640	25.015	64.0869	61.0712	156
chr1	6142558	6142940	Project004-IPSHOCH-Exp5-ChIP-ES-CTCF-IP-Blobel-Rep2-S1_S2_MACS2_rendition_1E-8_downsampled_try3_peak_28	741	24.7297	74.1858	71.0452	148
chr1	6180709	6180886	Project004-IPSHOCH-Exp5-ChIP-ES-CTCF-IP-Blobel-Rep2-S1_S2_MACS2_rendition_1E-8_downsampled_try3_peak_29	210	9.78882	21.053	18.5801	103
chr1	6262371	6262660	Project004-IPSHOCH-Exp5-ChIP-ES-CTCF-IP-Blobel-Rep2-S1_S2_MACS2_rendition_1E-8_downsampled_try3_peak_30	492	18.2432	49.2158	46.3778	150
chr1	6320773	6321028	Project004-IPSHOCH-Exp5-ChIP-ES-CTCF-IP-Blobel-Rep2-S1_S2_MACS2_rendition_1E-8_downsampled_try3_peak_31	394	17.3574	39.4954	36.7734	107
chr1	6372864	6373090	Project004-IPSHOCH-Exp5-ChIP-ES-CTCF-IP-Blobel-Rep2-S1_S2_MACS2_rendition_1E-8_downsampled_try3_peak_32	239	10.4733	23.9239	21.4098	93
chr1	6391664	6391932	Project004-IPSHOCH-Exp5-ChIP-ES-CTCF-IP-Blobel-Rep2-S1_S2_MACS2_rendition_1E-8_downsampled_try3_peak_33	276	13.007	27.6304	25.0623	131
chr1	6396447	6396818	Project004-IPSHOCH-Exp5-ChIP-ES-CTCF-IP-Blobel-Rep2-S1_S2_MACS2_rendition_1E-8_downsampled_try3_peak_34	681	20	68.1289	65.0626	138
chr1	6400230	6400455	Project004-IPSHOCH-Exp5-ChIP-ES-CTCF-IP-Blobel-Rep2-S1_S2_MACS2_rendition_1E-8_downsampled_try3_peak_35	433	16.6216	43.3264	40.5603	105
chr1	6407971	6408353	Project004-IPSHOCH-Exp5-ChIP-ES-CTCF-IP-Blobel-Rep2-S1_S2_MACS2_rendition_1E-8_downsampled_try3_peak_36	987	26.25	98.7009	95.2358	191
chr1	6473390	6473677	Project004-IPSHOCH-Exp5-ChIP-ES-CTCF-IP-Blobel-Rep2-S1_S2_MACS2_rendition_1E-8_downsampled_try3_peak_37	486	19.7514	48.6794	45.8506	144
chr1	6849122	6849496	Project004-IPSHOCH-Exp5-ChIP-ES-CTCF-IP-Blobel-Rep2-S1_S2_MACS2_rendition_1E-8_downsampled_try3_peak_38	675	26.036	67.5303	64.4731	159
chr1	6959488	6959715	Project004-IPSHOCH-Exp5-ChIP-ES-CTCF-IP-Blobel-Rep2-S1_S2_MACS2_rendition_1E-8_downsampled_try3_peak_39	168	8.51351	16.8225	14.4184	79
chr1	6969770	6969950	Project004-IPSHOCH-Exp5-ChIP-ES-CTCF-IP-Blobel-Rep2-S1_S2_MACS2_rendition_1E-8_downsampled_try3_peak_40	222	10.1804	22.2776	19.7851	57
chr1	6987780	6988050	Project004-IPSHOCH-Exp5-ChIP-ES-CTCF-IP-Blobel-Rep2-S1_S2_MACS2_rendition_1E-8_downsampled_try3_peak_41	424	18.2906	42.4845	39.7305	120
chr1	7000327	7000561	Project004-IPSHOCH-Exp5-ChIP-ES-CTCF-IP-Blobel-Rep2-S1_S2_MACS2_rendition_1E-8_downsampled_try3_peak_42	351	12.5	35.1463	32.4769	110
chr1	7089509	7089685	Project004-IPSHOCH-Exp5-ChIP-ES-CTCF-IP-Blobel-Rep2-S1_S2_MACS2_rendition_1E-8_downsampled_try3_peak_43	191	10.2102	19.1475	16.7048	49
chr1	7194753	7195185	Project004-IPSHOCH-Exp5-ChIP-ES-CTCF-IP-Blobel-Rep2-S1_S2_MACS2_rendition_1E-8_downsampled_try3_peak_44	594	18.125	59.4496	56.4908	281
chr1	7209024	7209331	Project004-IPSHOCH-Exp5-ChIP-ES-CTCF-IP-Blobel-Rep2-S1_S2_MACS2_rendition_1E-8_downsampled_try3_peak_45	265	10.3125	26.5652	24.012	160
chr1	7386936	7387770	Project004-IPSHOCH-Exp5-ChIP-ES-CTCF-IP-Blobel-Rep2-S1_S2_MACS2_rendition_1E-8_downsampled_try3_peak_46	982	18.8889	98.2427	94.7838	202
chr1	7388237	7388682	Project004-IPSHOCH-Exp5-ChIP-ES-CTCF-IP-Blobel-Rep2-S1_S2_MACS2_rendition_1E-8_downsampled_try3_peak_47	1149	39.3093	114.979	111.277	216
chr1	7533553	7533929	Project004-IPSHOCH-Exp5-ChIP-ES-CTCF-IP-Blobel-Rep2-S1_S2_MACS2_rendition_1E-8_downsampled_try3_peak_48	769	27.941	76.99	73.8167	203
chr1	7759759	7759971	Project004-IPSHOCH-Exp5-ChIP-ES-CTCF-IP-Blobel-Rep2-S1_S2_MACS2_rendition_1E-8_downsampled_try3_peak_49	277	10.625	27.7551	25.1846	112
chr1	8277656	8277969	Project004-IPSHOCH-Exp5-ChIP-ES-CTCF-IP-Blobel-Rep2-S1_S2_MACS2_rendition_1E-8_downsampled_try3_peak_50	333	14.934	33.3837	30.74	156
chr1	8668809	8669149	Project004-IPSHOCH-Exp5-ChIP-ES-CTCF-IP-Blobel-Rep2-S1_S2_MACS2_rendition_1E-8_downsampled_try3_peak_51	418	16.2162	41.8796	39.1309	196
chr1	8750404	8750656	Project004-IPSHOCH-Exp5-ChIP-ES-CTCF-IP-Blobel-Rep2-S1_S2_MACS2_rendition_1E-8_downsampled_try3_peak_52	458	19.3994	45.8181	43.0208	116
chr1	9091024	9091297	Project004-IPSHOCH-Exp5-ChIP-ES-CTCF-IP-Blobel-Rep2-S1_S2_MACS2_rendition_1E-8_downsampled_try3_peak_53	154	7.1875	15.4506	13.074	114
chr1	9398199	9398433	Project004-IPSHOCH-Exp5-ChIP-ES-CTCF-IP-Blobel-Rep2-S1_S2_MACS2_rendition_1E-8_downsampled_try3_peak_54	289	13.7838	28.9313	26.346	113
chr1	9459544	9459917	Project004-IPSHOCH-Exp5-ChIP-ES-CTCF-IP-Blobel-Rep2-S1_S2_MACS2_rendition_1E-8_downsampled_try3_peak_55	629	20.4082	62.9187	59.9202	155
chr1	9531318	9531733	Project004-IPSHOCH-Exp5-ChIP-ES-CTCF-IP-Blobel-Rep2-S1_S2_MACS2_rendition_1E-8_downsampled_try3_peak_56	1747	53.4329	174.753	170.156	203
chr1	9535290	9535522	Project004-IPSHOCH-Exp5-ChIP-ES-CTCF-IP-Blobel-Rep2-S1_S2_MACS2_rendition_1E-8_downsampled_try3_peak_57	293	9.91525	29.3234	26.7326	124
chr1	9535960	9536141	Project004-IPSHOCH-Exp5-ChIP-ES-CTCF-IP-Blobel-Rep2-S1_S2_MACS2_rendition_1E-8_downsampled_try3_peak_58	179	7.05963	17.9675	15.5454	90
chr1	9539137	9539354	Project004-IPSHOCH-Exp5-ChIP-ES-CTCF-IP-Blobel-Rep2-S1_S2_MACS2_rendition_1E-8_downsampled_try3_peak_59	219	9.66702	21.9403	19.45	125
chr1	9563258	9563664	Project004-IPSHOCH-Exp5-ChIP-ES-CTCF-IP-Blobel-Rep2-S1_S2_MACS2_rendition_1E-8_downsampled_try3_peak_60	1167	34.8649	116.709	112.989	244
chr1	9611565	9611785	Project004-IPSHOCH-Exp5-ChIP-ES-CTCF-IP-Blobel-Rep2-S1_S2_MACS2_rendition_1E-8_downsampled_try3_peak_61	318	12.5313	31.8955	29.2707	93
chr1	9685625	9685861	Project004-IPSHOCH-Exp5-ChIP-ES-CTCF-IP-Blobel-Rep2-S1_S2_MACS2_rendition_1E-8_downsampled_try3_peak_62	260	11.355	26.0468	23.4987	118
chr1	9686953	9687233	Project004-IPSHOCH-Exp5-ChIP-ES-CTCF-IP-Blobel-Rep2-S1_S2_MACS2_rendition_1E-8_downsampled_try3_peak_63	468	18.2378	46.8737	44.0676	142
chr1	9693176	9693522	Project004-IPSHOCH-Exp5-ChIP-ES-CTCF-IP-Blobel-Rep2-S1_S2_MACS2_rendition_1E-8_downsampled_try3_peak_64	857	29.8018	85.7694	82.4754	154
chr1	9719566	9719916	Project004-IPSHOCH-Exp5-ChIP-ES-CTCF-IP-Blobel-Rep2-S1_S2_MACS2_rendition_1E-8_downsampled_try3_peak_65	267	11.7568	26.7382	24.1807	119
chr1	9762859	9763215	Project004-IPSHOCH-Exp5-ChIP-ES-CTCF-IP-Blobel-Rep2-S1_S2_MACS2_rendition_1E-8_downsampled_try3_peak_66	1298	39.3111	129.878	125.959	180
chr1	9804968	9805136	Project004-IPSHOCH-Exp5-ChIP-ES-CTCF-IP-Blobel-Rep2-S1_S2_MACS2_rendition_1E-8_downsampled_try3_peak_67	178	9.6997	17.8272	15.4061	74
chr1	9942084	9942256	Project004-IPSHOCH-Exp5-ChIP-ES-CTCF-IP-Blobel-Rep2-S1_S2_MACS2_rendition_1E-8_downsampled_try3_peak_68	130	7.34384	13.0683	10.7421	86
chr1	9980193	9980359	Project004-IPSHOCH-Exp5-ChIP-ES-CTCF-IP-Blobel-Rep2-S1_S2_MACS2_rendition_1E-8_downsampled_try3_peak_69	200	10.4786	20.087	17.6326	61
chr1	9997375	9997730	Project004-IPSHOCH-Exp5-ChIP-ES-CTCF-IP-Blobel-Rep2-S1_S2_MACS2_rendition_1E-8_downsampled_try3_peak_70	584	19.8244	58.4923	55.5447	146
chr1	10029536	10029909	Project004-IPSHOCH-Exp5-ChIP-ES-CTCF-IP-Blobel-Rep2-S1_S2_MACS2_rendition_1E-8_downsampled_try3_peak_71	1068	31.6628	106.849	103.269	186
chr1	10079629	10080073	Project004-IPSHOCH-Exp5-ChIP-ES-CTCF-IP-Blobel-Rep2-S1_S2_MACS2_rendition_1E-8_downsampled_try3_peak_72	1456	41.3513	145.648	141.487	208
chr1	10104848	10105098	Project004-IPSHOCH-Exp5-ChIP-ES-CTCF-IP-Blobel-Rep2-S1_S2_MACS2_rendition_1E-8_downsampled_try3_peak_73	363	15.8975	36.3448	33.6664	109
chr1	10171962	10172130	Project004-IPSHOCH-Exp5-ChIP-ES-CTCF-IP-Blobel-Rep2-S1_S2_MACS2_rendition_1E-8_downsampled_try3_peak_74	151	7.83106	15.1991	12.8341	53
chr1	10187052	10187386	Project004-IPSHOCH-Exp5-ChIP-ES-CTCF-IP-Blobel-Rep2-S1_S2_MACS2_rendition_1E-8_downsampled_try3_peak_75	265	10.3125	26.5652	24.012	178
chr1	10387968	10388249	Project004-IPSHOCH-Exp5-ChIP-ES-CTCF-IP-Blobel-Rep2-S1_S2_MACS2_rendition_1E-8_downsampled_try3_peak_76	338	12.1875	33.886	31.2347	129
chr1	10478255	10478651	Project004-IPSHOCH-Exp5-ChIP-ES-CTCF-IP-Blobel-Rep2-S1_S2_MACS2_rendition_1E-8_downsampled_try3_peak_77	643	23.6866	64.3864	61.369	235
chr1	10608096	10608266	Project004-IPSHOCH-Exp5-ChIP-ES-CTCF-IP-Blobel-Rep2-S1_S2_MACS2_rendition_1E-8_downsampled_try3_peak_78	178	9.6997	17.8272	15.4061	79
chr1	10749673	10750070	Project004-IPSHOCH-Exp5-ChIP-ES-CTCF-IP-Blobel-Rep2-S1_S2_MACS2_rendition_1E-8_downsampled_try3_peak_79	677	23.1081	67.7527	64.6901	195
chr1	10825777	10826086	Project004-IPSHOCH-Exp5-ChIP-ES-CTCF-IP-Blobel-Rep2-S1_S2_MACS2_rendition_1E-8_downsampled_try3_peak_80	442	14.6875	44.2539	41.4744	159
chr1	10827350	10827544	Project004-IPSHOCH-Exp5-ChIP-ES-CTCF-IP-Blobel-Rep2-S1_S2_MACS2_rendition_1E-8_downsampled_try3_peak_81	178	9.6997	17.8272	15.4061	114
chr1	10994245	10994408	Project004-IPSHOCH-Exp5-ChIP-ES-CTCF-IP-Blobel-Rep2-S1_S2_MACS2_rendition_1E-8_downsampled_try3_peak_82	114	5.9375	11.4842	9.19838	81
chr1	11055303	11055573	Project004-IPSHOCH-Exp5-ChIP-ES-CTCF-IP-Blobel-Rep2-S1_S2_MACS2_rendition_1E-8_downsampled_try3_peak_83	422	17.3094	42.2796	39.5288	138
chr1	11087386	11087584	Project004-IPSHOCH-Exp5-ChIP-ES-CTCF-IP-Blobel-Rep2-S1_S2_MACS2_rendition_1E-8_downsampled_try3_peak_84	221	11.0801	22.13	19.6384	74
chr1	11130092	11130280	Project004-IPSHOCH-Exp5-ChIP-ES-CTCF-IP-Blobel-Rep2-S1_S2_MACS2_rendition_1E-8_downsampled_try3_peak_85	216	10.1351	21.6442	19.1647	65
chr1	11141641	11141941	Project004-IPSHOCH-Exp5-ChIP-ES-CTCF-IP-Blobel-Rep2-S1_S2_MACS2_rendition_1E-8_downsampled_try3_peak_86	600	22.172	60.0834	57.1171	152
chr1	11223955	11224296	Project004-IPSHOCH-Exp5-ChIP-ES-CTCF-IP-Blobel-Rep2-S1_S2_MACS2_rendition_1E-8_downsampled_try3_peak_87	416	14.0625	41.603	38.8581	198
chr1	11375929	11376256	Project004-IPSHOCH-Exp5-ChIP-ES-CTCF-IP-Blobel-Rep2-S1_S2_MACS2_rendition_1E-8_downsampled_try3_peak_88	619	21.7713	61.9387	58.9508	161
chr1	11404195	11404547	Project004-IPSHOCH-Exp5-ChIP-ES-CTCF-IP-Blobel-Rep2-S1_S2_MACS2_rendition_1E-8_downsampled_try3_peak_89	770	21.875	77.0506	73.8727	149
chr1	11456487	11456767	Project004-IPSHOCH-Exp5-ChIP-ES-CTCF-IP-Blobel-Rep2-S1_S2_MACS2_rendition_1E-8_downsampled_try3_peak_90	569	19.4504	56.9914	54.0627	118
chr1	11555453	11555807	Project004-IPSHOCH-Exp5-ChIP-ES-CTCF-IP-Blobel-Rep2-S1_S2_MACS2_rendition_1E-8_downsampled_try3_peak_91	1111	38.2883	111.175	107.534	171
chr1	11647840	11648118	Project004-IPSHOCH-Exp5-ChIP-ES-CTCF-IP-Blobel-Rep2-S1_S2_MACS2_rendition_1E-8_downsampled_try3_peak_92	969	32.3413	96.9398	93.5005	122
chr1	11863770	11863951	Project004-IPSHOCH-Exp5-ChIP-ES-CTCF-IP-Blobel-Rep2-S1_S2_MACS2_rendition_1E-8_downsampled_try3_peak_93	140	8.16817	14.0041	11.6555	135
chr1	12018268	12018474	Project004-IPSHOCH-Exp5-ChIP-ES-CTCF-IP-Blobel-Rep2-S1_S2_MACS2_rendition_1E-8_downsampled_try3_peak_94	169	9.1531	16.9255	14.5197	106
chr1	12689214	12689496	Project004-IPSHOCH-Exp5-ChIP-ES-CTCF-IP-Blobel-Rep2-S1_S2_MACS2_rendition_1E-8_downsampled_try3_peak_95	634	15.2143	63.4361	60.4296	130
chr1	12691755	12692033	Project004-IPSHOCH-Exp5-ChIP-ES-CTCF-IP-Blobel-Rep2-S1_S2_MACS2_rendition_1E-8_downsampled_try3_peak_96	687	24.1915	68.7554	65.6847	129
chr1	12808889	12809144	Project004-IPSHOCH-Exp5-ChIP-ES-CTCF-IP-Blobel-Rep2-S1_S2_MACS2_rendition_1E-8_downsampled_try3_peak_97	217	10.8306	21.7155	19.235	134
chr1	12826918	12827265	Project004-IPSHOCH-Exp5-ChIP-ES-CTCF-IP-Blobel-Rep2-S1_S2_MACS2_rendition_1E-8_downsampled_try3_peak_98	982	27.0443	98.2978	94.8381	162
chr1	12832816	12833089	Project004-IPSHOCH-Exp5-ChIP-ES-CTCF-IP-Blobel-Rep2-S1_S2_MACS2_rendition_1E-8_downsampled_try3_peak_99	515	20.0425	51.5225	48.6589	132
chr1	12854184	12854492	Project004-IPSHOCH-Exp5-ChIP-ES-CTCF-IP-Blobel-Rep2-S1_S2_MACS2_rendition_1E-8_downsampled_try3_peak_100	686	17.7966	68.6187	65.5494	135
chr1	12855458	12855780	Project004-IPSHOCH-Exp5-ChIP-ES-CTCF-IP-Blobel-Rep2-S1_S2_MACS2_rendition_1E-8_downsampled_try3_peak_101	264	12.6712	26.474	23.9227	178
chr1	12925856	12926233	Project004-IPSHOCH-Exp5-ChIP-ES-CTCF-IP-Blobel-Rep2-S1_S2_MACS2_rendition_1E-8_downsampled_try3_peak_102	645	22.2973	64.5809	61.5577	216
chr1	12980207	12980679	Project004-IPSHOCH-Exp5-ChIP-ES-CTCF-IP-Blobel-Rep2-S1_S2_MACS2_rendition_1E-8_downsampled_try3_peak_103	1579	34.4378	157.919	153.576	239
chr1	12982787	12982951	Project004-IPSHOCH-Exp5-ChIP-ES-CTCF-IP-Blobel-Rep2-S1_S2_MACS2_rendition_1E-8_downsampled_try3_peak_104	137	6.10169	13.796	11.4567	88
chr1	13040198	13040657	Project004-IPSHOCH-Exp5-ChIP-ES-CTCF-IP-Blobel-Rep2-S1_S2_MACS2_rendition_1E-8_downsampled_try3_peak_105	763	13.6893	76.3278	73.1578	194
chr1	13042078	13042532	Project004-IPSHOCH-Exp5-ChIP-ES-CTCF-IP-Blobel-Rep2-S1_S2_MACS2_rendition_1E-8_downsampled_try3_peak_106	1096	33.2432	109.667	106.044	196
chr1	13061641	13061807	Project004-IPSHOCH-Exp5-ChIP-ES-CTCF-IP-Blobel-Rep2-S1_S2_MACS2_rendition_1E-8_downsampled_try3_peak_107	156	6.61017	15.6784	13.2953	87
chr1	13069683	13070028	Project004-IPSHOCH-Exp5-ChIP-ES-CTCF-IP-Blobel-Rep2-S1_S2_MACS2_rendition_1E-8_downsampled_try3_peak_108	239	10.4733	23.9239	21.4098	144
chr1	13107837	13108619	Project004-IPSHOCH-Exp5-ChIP-ES-CTCF-IP-Blobel-Rep2-S1_S2_MACS2_rendition_1E-8_downsampled_try3_peak_109	429	14.375	42.9238	40.1617	144
chr1	13124370	13124872	Project004-IPSHOCH-Exp5-ChIP-ES-CTCF-IP-Blobel-Rep2-S1_S2_MACS2_rendition_1E-8_downsampled_try3_peak_110	1246	31.25	124.674	120.831	235
chr1	13128431	13128628	Project004-IPSHOCH-Exp5-ChIP-ES-CTCF-IP-Blobel-Rep2-S1_S2_MACS2_rendition_1E-8_downsampled_try3_peak_111	168	8.51351	16.8225	14.4184	90
chr1	13132989	13133329	Project004-IPSHOCH-Exp5-ChIP-ES-CTCF-IP-Blobel-Rep2-S1_S2_MACS2_rendition_1E-8_downsampled_try3_peak_112	861	18.8571	86.1865	82.8912	162
chr1	13141135	13141480	Project004-IPSHOCH-Exp5-ChIP-ES-CTCF-IP-Blobel-Rep2-S1_S2_MACS2_rendition_1E-8_downsampled_try3_peak_113	1115	28.75	111.537	107.885	185
chr1	13189261	13189445	Project004-IPSHOCH-Exp5-ChIP-ES-CTCF-IP-Blobel-Rep2-S1_S2_MACS2_rendition_1E-8_downsampled_try3_peak_114	228	10.5405	22.8938	20.394	93
chr1	13217307	13217681	Project004-IPSHOCH-Exp5-ChIP-ES-CTCF-IP-Blobel-Rep2-S1_S2_MACS2_rendition_1E-8_downsampled_try3_peak_115	623	18.75	62.3143	59.3228	213
chr1	13345754	13346120	Project004-IPSHOCH-Exp5-ChIP-ES-CTCF-IP-Blobel-Rep2-S1_S2_MACS2_rendition_1E-8_downsampled_try3_peak_116	153	8.20782	15.368	12.9935	309
chr1	13362932	13363279	Project004-IPSHOCH-Exp5-ChIP-ES-CTCF-IP-Blobel-Rep2-S1_S2_MACS2_rendition_1E-8_downsampled_try3_peak_117	444	17.7376	44.4961	41.7163	209
chr1	13366897	13367227	Project004-IPSHOCH-Exp5-ChIP-ES-CTCF-IP-Blobel-Rep2-S1_S2_MACS2_rendition_1E-8_downsampled_try3_peak_118	466	17.2283	46.6612	43.8572	151
chr1	13490611	13490998	Project004-IPSHOCH-Exp5-ChIP-ES-CTCF-IP-Blobel-Rep2-S1_S2_MACS2_rendition_1E-8_downsampled_try3_peak_119	741	24.7297	74.1858	71.0452	133
chr1	13521579	13521960	Project004-IPSHOCH-Exp5-ChIP-ES-CTCF-IP-Blobel-Rep2-S1_S2_MACS2_rendition_1E-8_downsampled_try3_peak_120	992	30.8108	99.2628	95.7882	209
chr1	13579882	13580267	Project004-IPSHOCH-Exp5-ChIP-ES-CTCF-IP-Blobel-Rep2-S1_S2_MACS2_rendition_1E-8_downsampled_try3_peak_121	1414	34.375	141.481	137.387	226
chr1	13615793	13616017	Project004-IPSHOCH-Exp5-ChIP-ES-CTCF-IP-Blobel-Rep2-S1_S2_MACS2_rendition_1E-8_downsampled_try3_peak_122	248	12.0435	24.8463	22.3158	105
chr1	13622365	13622543	Project004-IPSHOCH-Exp5-ChIP-ES-CTCF-IP-Blobel-Rep2-S1_S2_MACS2_rendition_1E-8_downsampled_try3_peak_123	170	6.42857	17.0335	14.6269	119
chr1	13649933	13650148	Project004-IPSHOCH-Exp5-ChIP-ES-CTCF-IP-Blobel-Rep2-S1_S2_MACS2_rendition_1E-8_downsampled_try3_peak_124	179	9.47122	17.9259	15.5045	122
chr1	13687477	13687784	Project004-IPSHOCH-Exp5-ChIP-ES-CTCF-IP-Blobel-Rep2-S1_S2_MACS2_rendition_1E-8_downsampled_try3_peak_125	280	12.1622	28.0497	25.4743	122
chr1	13696312	13696792	Project004-IPSHOCH-Exp5-ChIP-ES-CTCF-IP-Blobel-Rep2-S1_S2_MACS2_rendition_1E-8_downsampled_try3_peak_126	1245	41.8619	124.586	120.748	275
chr1	13774443	13774824	Project004-IPSHOCH-Exp5-ChIP-ES-CTCF-IP-Blobel-Rep2-S1_S2_MACS2_rendition_1E-8_downsampled_try3_peak_127	1034	27.1875	103.477	99.9463	229
chr1	13779317	13779647	Project004-IPSHOCH-Exp5-ChIP-ES-CTCF-IP-Blobel-Rep2-S1_S2_MACS2_rendition_1E-8_downsampled_try3_peak_128	1330	32.8125	133.026	129.055	143
chr1	13829804	13830042	Project004-IPSHOCH-Exp5-ChIP-ES-CTCF-IP-Blobel-Rep2-S1_S2_MACS2_rendition_1E-8_downsampled_try3_peak_129	523	21.4414	52.3213	49.4467	101
chr1	14127754	14128046	Project004-IPSHOCH-Exp5-ChIP-ES-CTCF-IP-Blobel-Rep2-S1_S2_MACS2_rendition_1E-8_downsampled_try3_peak_130	293	12.5676	29.3754	26.781	141
chr1	14167372	14167555	Project004-IPSHOCH-Exp5-ChIP-ES-CTCF-IP-Blobel-Rep2-S1_S2_MACS2_rendition_1E-8_downsampled_try3_peak_131	164	7.5	16.4902	14.1	65
chr1	14560814	14561154	Project004-IPSHOCH-Exp5-ChIP-ES-CTCF-IP-Blobel-Rep2-S1_S2_MACS2_rendition_1E-8_downsampled_try3_peak_132	537	19.4595	53.7338	50.8462	135
chr1	14626006	14626242	Project004-IPSHOCH-Exp5-ChIP-ES-CTCF-IP-Blobel-Rep2-S1_S2_MACS2_rendition_1E-8_downsampled_try3_peak_133	191	10.2102	19.1475	16.7048	151
chr1	14676268	14676542	Project004-IPSHOCH-Exp5-ChIP-ES-CTCF-IP-Blobel-Rep2-S1_S2_MACS2_rendition_1E-8_downsampled_try3_peak_134	334	14.5764	33.4436	30.7959	161
chr1	14696336	14696629	Project004-IPSHOCH-Exp5-ChIP-ES-CTCF-IP-Blobel-Rep2-S1_S2_MACS2_rendition_1E-8_downsampled_try3_peak_135	362	14.5946	36.202	33.5264	139
chr1	14719164	14719478	Project004-IPSHOCH-Exp5-ChIP-ES-CTCF-IP-Blobel-Rep2-S1_S2_MACS2_rendition_1E-8_downsampled_try3_peak_136	923	28.5834	92.3414	88.9689	161
chr1	14728465	14728674	Project004-IPSHOCH-Exp5-ChIP-ES-CTCF-IP-Blobel-Rep2-S1_S2_MACS2_rendition_1E-8_downsampled_try3_peak_137	144	6.875	14.4294	12.0758	127
chr1	14730218	14730471	Project004-IPSHOCH-Exp5-ChIP-ES-CTCF-IP-Blobel-Rep2-S1_S2_MACS2_rendition_1E-8_downsampled_try3_peak_138	492	18.2432	49.2158	46.3778	151
chr1	14852489	14852804	Project004-IPSHOCH-Exp5-ChIP-ES-CTCF-IP-Blobel-Rep2-S1_S2_MACS2_rendition_1E-8_downsampled_try3_peak_139	551	21.6784	55.1068	52.2047	171
chr1	14970443	14970674	Project004-IPSHOCH-Exp5-ChIP-ES-CTCF-IP-Blobel-Rep2-S1_S2_MACS2_rendition_1E-8_downsampled_try3_peak_140	490	20.4204	49.0482	46.2139	107
chr1	14997676	14998094	Project004-IPSHOCH-Exp5-ChIP-ES-CTCF-IP-Blobel-Rep2-S1_S2_MACS2_rendition_1E-8_downsampled_try3_peak_141	623	24.5045	62.3783	59.3817	237
chr1	15007828	15008090	Project004-IPSHOCH-Exp5-ChIP-ES-CTCF-IP-Blobel-Rep2-S1_S2_MACS2_rendition_1E-8_downsampled_try3_peak_142	426	18.3784	42.633	39.8736	118
chr1	15101569	15101821	Project004-IPSHOCH-Exp5-ChIP-ES-CTCF-IP-Blobel-Rep2-S1_S2_MACS2_rendition_1E-8_downsampled_try3_peak_143	433	16.6216	43.3264	40.5603	123
chr1	15317437	15317869	Project004-IPSHOCH-Exp5-ChIP-ES-CTCF-IP-Blobel-Rep2-S1_S2_MACS2_rendition_1E-8_downsampled_try3_peak_144	1218	40.9055	121.888	118.094	196
chr1	15612030	15612349	Project004-IPSHOCH-Exp5-ChIP-ES-CTCF-IP-Blobel-Rep2-S1_S2_MACS2_rendition_1E-8_downsampled_try3_peak_145	755	21.5625	75.5477	72.391	152
chr1	15634158	15634391	Project004-IPSHOCH-Exp5-ChIP-ES-CTCF-IP-Blobel-Rep2-S1_S2_MACS2_rendition_1E-8_downsampled_try3_peak_146	191	10.2102	19.1475	16.7048	112
chr1	15673763	15674091	Project004-IPSHOCH-Exp5-ChIP-ES-CTCF-IP-Blobel-Rep2-S1_S2_MACS2_rendition_1E-8_downsampled_try3_peak_147	727	18.5593	72.7893	69.6608	145
chr1	15782032	15782460	Project004-IPSHOCH-Exp5-ChIP-ES-CTCF-IP-Blobel-Rep2-S1_S2_MACS2_rendition_1E-8_downsampled_try3_peak_148	682	23.4144	68.2896	65.2226	147
chr1	15865220	15865383	Project004-IPSHOCH-Exp5-ChIP-ES-CTCF-IP-Blobel-Rep2-S1_S2_MACS2_rendition_1E-8_downsampled_try3_peak_149	165	9.18919	16.529	14.131	103
chr1	15892486	15892927	Project004-IPSHOCH-Exp5-ChIP-ES-CTCF-IP-Blobel-Rep2-S1_S2_MACS2_rendition_1E-8_downsampled_try3_peak_150	885	21.3559	88.5207	85.196	234
chr1	15983681	15983993	Project004-IPSHOCH-Exp5-ChIP-ES-CTCF-IP-Blobel-Rep2-S1_S2_MACS2_rendition_1E-8_downsampled_try3_peak_151	270	9.40678	27.0855	24.5258	155
chr1	15997032	15997319	Project004-IPSHOCH-Exp5-ChIP-ES-CTCF-IP-Blobel-Rep2-S1_S2_MACS2_rendition_1E-8_downsampled_try3_peak_152	502	20.2332	50.2712	47.4245	146
chr1	16052071	16052367	Project004-IPSHOCH-Exp5-ChIP-ES-CTCF-IP-Blobel-Rep2-S1_S2_MACS2_rendition_1E-8_downsampled_try3_peak_153	658	25.5255	65.8043	62.7688	138
chr1	16095639	16096043	Project004-IPSHOCH-Exp5-ChIP-ES-CTCF-IP-Blobel-Rep2-S1_S2_MACS2_rendition_1E-8_downsampled_try3_peak_154	442	14.6875	44.2539	41.4744	251
chr1	16105483	16105646	Project004-IPSHOCH-Exp5-ChIP-ES-CTCF-IP-Blobel-Rep2-S1_S2_MACS2_rendition_1E-8_downsampled_try3_peak_155	147	8.3827	14.7683	12.4065	78
chr1	16150247	16150511	Project004-IPSHOCH-Exp5-ChIP-ES-CTCF-IP-Blobel-Rep2-S1_S2_MACS2_rendition_1E-8_downsampled_try3_peak_156	423	16.0537	42.3342	39.5828	111
chr1	16295015	16295269	Project004-IPSHOCH-Exp5-ChIP-ES-CTCF-IP-Blobel-Rep2-S1_S2_MACS2_rendition_1E-8_downsampled_try3_peak_157	246	12.2523	24.6304	22.1021	95
chr1	16423502	16423907	Project004-IPSHOCH-Exp5-ChIP-ES-CTCF-IP-Blobel-Rep2-S1_S2_MACS2_rendition_1E-8_downsampled_try3_peak_158	801	28.739	80.1929	76.9742	154
chr1	16430307	16430624	Project004-IPSHOCH-Exp5-ChIP-ES-CTCF-IP-Blobel-Rep2-S1_S2_MACS2_rendition_1E-8_downsampled_try3_peak_159	695	20.3125	69.5996	66.5135	162
chr1	16481276	16481600	Project004-IPSHOCH-Exp5-ChIP-ES-CTCF-IP-Blobel-Rep2-S1_S2_MACS2_rendition_1E-8_downsampled_try3_peak_160	540	19.1861	54.0651	51.1676	189
chr1	16509782	16510022	Project004-IPSHOCH-Exp5-ChIP-ES-CTCF-IP-Blobel-Rep2-S1_S2_MACS2_rendition_1E-8_downsampled_try3_peak_161	319	14.4523	31.9236	29.298	144
chr1	16544066	16544315	Project004-IPSHOCH-Exp5-ChIP-ES-CTCF-IP-Blobel-Rep2-S1_S2_MACS2_rendition_1E-8_downsampled_try3_peak_162	218	11.2312	21.8505	19.3628	122
chr1	16567808	16568134	Project004-IPSHOCH-Exp5-ChIP-ES-CTCF-IP-Blobel-Rep2-S1_S2_MACS2_rendition_1E-8_downsampled_try3_peak_163	418	16.2162	41.8796	39.1309	182
chr1	16621906	16622194	Project004-IPSHOCH-Exp5-ChIP-ES-CTCF-IP-Blobel-Rep2-S1_S2_MACS2_rendition_1E-8_downsampled_try3_peak_164	455	18.7879	45.5274	42.738	107
chr1	16665223	16665386	Project004-IPSHOCH-Exp5-ChIP-ES-CTCF-IP-Blobel-Rep2-S1_S2_MACS2_rendition_1E-8_downsampled_try3_peak_165	123	6.89189	12.3237	10.0163	70
chr1	16736197	16736365	Project004-IPSHOCH-Exp5-ChIP-ES-CTCF-IP-Blobel-Rep2-S1_S2_MACS2_rendition_1E-8_downsampled_try3_peak_166	173	9.11023	17.3301	14.9216	87
chr1	16788382	16788809	Project004-IPSHOCH-Exp5-ChIP-ES-CTCF-IP-Blobel-Rep2-S1_S2_MACS2_rendition_1E-8_downsampled_try3_peak_167	884	26.9313	88.4033	85.0801	248
chr1	17103182	17103425	Project004-IPSHOCH-Exp5-ChIP-ES-CTCF-IP-Blobel-Rep2-S1_S2_MACS2_rendition_1E-8_downsampled_try3_peak_168	228	10.5405	22.8938	20.394	119
chr1	17113544	17113863	Project004-IPSHOCH-Exp5-ChIP-ES-CTCF-IP-Blobel-Rep2-S1_S2_MACS2_rendition_1E-8_downsampled_try3_peak_169	911	31.795	91.1018	87.7374	159
chr1	17135608	17135865	Project004-IPSHOCH-Exp5-ChIP-ES-CTCF-IP-Blobel-Rep2-S1_S2_MACS2_rendition_1E-8_downsampled_try3_peak_170	385	14.3215	38.5277	35.8214	132
chr1	17153631	17153969	Project004-IPSHOCH-Exp5-ChIP-ES-CTCF-IP-Blobel-Rep2-S1_S2_MACS2_rendition_1E-8_downsampled_try3_peak_171	1076	30.4332	107.665	104.075	158
chr1	17619747	17619988	Project004-IPSHOCH-Exp5-ChIP-ES-CTCF-IP-Blobel-Rep2-S1_S2_MACS2_rendition_1E-8_downsampled_try3_peak_172	408	17.3427	40.8826	38.1484	112
chr1	17697462	17697683	Project004-IPSHOCH-Exp5-ChIP-ES-CTCF-IP-Blobel-Rep2-S1_S2_MACS2_rendition_1E-8_downsampled_try3_peak_173	104	6.63664	10.4174	8.15171	109
chr1	17968279	17968497	Project004-IPSHOCH-Exp5-ChIP-ES-CTCF-IP-Blobel-Rep2-S1_S2_MACS2_rendition_1E-8_downsampled_try3_peak_174	218	11.2312	21.8505	19.3628	99
chr1	17970699	17971034	Project004-IPSHOCH-Exp5-ChIP-ES-CTCF-IP-Blobel-Rep2-S1_S2_MACS2_rendition_1E-8_downsampled_try3_peak_175	807	26.3514	80.732	77.5056	162
chr1	18002969	18003544	Project004-IPSHOCH-Exp5-ChIP-ES-CTCF-IP-Blobel-Rep2-S1_S2_MACS2_rendition_1E-8_downsampled_try3_peak_176	770	19.322	77.013	73.8385	248
chr1	18005765	18006092	Project004-IPSHOCH-Exp5-ChIP-ES-CTCF-IP-Blobel-Rep2-S1_S2_MACS2_rendition_1E-8_downsampled_try3_peak_177	246	12.2523	24.6304	22.1021	167
chr1	18096276	18097160	Project004-IPSHOCH-Exp5-ChIP-ES-CTCF-IP-Blobel-Rep2-S1_S2_MACS2_rendition_1E-8_downsampled_try3_peak_178	928	32.2767	92.8962	89.5083	725
chr1	18121808	18122083	Project004-IPSHOCH-Exp5-ChIP-ES-CTCF-IP-Blobel-Rep2-S1_S2_MACS2_rendition_1E-8_downsampled_try3_peak_179	467	16.8321	46.7257	43.9208	135
chr1	18278987	18279308	Project004-IPSHOCH-Exp5-ChIP-ES-CTCF-IP-Blobel-Rep2-S1_S2_MACS2_rendition_1E-8_downsampled_try3_peak_180	888	32.1622	88.8575	85.5268	126
chr1	18280163	18280369	Project004-IPSHOCH-Exp5-ChIP-ES-CTCF-IP-Blobel-Rep2-S1_S2_MACS2_rendition_1E-8_downsampled_try3_peak_181	125	7.28819	12.5684	10.2558	157
chr1	18350038	18350419	Project004-IPSHOCH-Exp5-ChIP-ES-CTCF-IP-Blobel-Rep2-S1_S2_MACS2_rendition_1E-8_downsampled_try3_peak_182	458	19.3994	45.8181	43.0208	177
chr1	18396472	18396678	Project004-IPSHOCH-Exp5-ChIP-ES-CTCF-IP-Blobel-Rep2-S1_S2_MACS2_rendition_1E-8_downsampled_try3_peak_183	165	9.18919	16.529	14.131	104
chr1	18402920	18403176	Project004-IPSHOCH-Exp5-ChIP-ES-CTCF-IP-Blobel-Rep2-S1_S2_MACS2_rendition_1E-8_downsampled_try3_peak_184	474	19.9099	47.4277	44.6113	95
chr1	18600713	18601059	Project004-IPSHOCH-Exp5-ChIP-ES-CTCF-IP-Blobel-Rep2-S1_S2_MACS2_rendition_1E-8_downsampled_try3_peak_185	289	13.7838	28.9313	26.346	218
chr1	18783758	18784108	Project004-IPSHOCH-Exp5-ChIP-ES-CTCF-IP-Blobel-Rep2-S1_S2_MACS2_rendition_1E-8_downsampled_try3_peak_186	924	29.1892	92.4393	89.0591	201
chr1	18966854	18967183	Project004-IPSHOCH-Exp5-ChIP-ES-CTCF-IP-Blobel-Rep2-S1_S2_MACS2_rendition_1E-8_downsampled_try3_peak_187	586	20.3607	58.6141	55.6656	122
chr1	19046383	19046792	Project004-IPSHOCH-Exp5-ChIP-ES-CTCF-IP-Blobel-Rep2-S1_S2_MACS2_rendition_1E-8_downsampled_try3_peak_188	1044	32.027	104.44	100.893	232
chr1	19139932	19140157	Project004-IPSHOCH-Exp5-ChIP-ES-CTCF-IP-Blobel-Rep2-S1_S2_MACS2_rendition_1E-8_downsampled_try3_peak_189	197	8.4375	19.7116	17.2597	104
chr1	19169108	19169454	Project004-IPSHOCH-Exp5-ChIP-ES-CTCF-IP-Blobel-Rep2-S1_S2_MACS2_rendition_1E-8_downsampled_try3_peak_190	852	31.1411	85.2291	81.9441	195
chr1	19182622	19182848	Project004-IPSHOCH-Exp5-ChIP-ES-CTCF-IP-Blobel-Rep2-S1_S2_MACS2_rendition_1E-8_downsampled_try3_peak_191	228	10.5405	22.8938	20.394	93
chr1	19195661	19196648	Project004-IPSHOCH-Exp5-ChIP-ES-CTCF-IP-Blobel-Rep2-S1_S2_MACS2_rendition_1E-8_downsampled_try3_peak_192	1448	35	144.891	140.744	193
chr1	19280271	19280493	Project004-IPSHOCH-Exp5-ChIP-ES-CTCF-IP-Blobel-Rep2-S1_S2_MACS2_rendition_1E-8_downsampled_try3_peak_193	289	10.9375	28.9576	26.3703	105
chr1	19407095	19407258	Project004-IPSHOCH-Exp5-ChIP-ES-CTCF-IP-Blobel-Rep2-S1_S2_MACS2_rendition_1E-8_downsampled_try3_peak_194	179	8.60306	17.9648	15.5427	103
chr1	19567296	19567509	Project004-IPSHOCH-Exp5-ChIP-ES-CTCF-IP-Blobel-Rep2-S1_S2_MACS2_rendition_1E-8_downsampled_try3_peak_195	147	6.35593	14.7288	12.3673	94
chr1	20296353	20296553	Project004-IPSHOCH-Exp5-ChIP-ES-CTCF-IP-Blobel-Rep2-S1_S2_MACS2_rendition_1E-8_downsampled_try3_peak_196	318	14.8048	31.8784	29.254	94
chr1	20301632	20301916	Project004-IPSHOCH-Exp5-ChIP-ES-CTCF-IP-Blobel-Rep2-S1_S2_MACS2_rendition_1E-8_downsampled_try3_peak_197	293	9.91525	29.3234	26.7326	160
chr1	20440253	20440494	Project004-IPSHOCH-Exp5-ChIP-ES-CTCF-IP-Blobel-Rep2-S1_S2_MACS2_rendition_1E-8_downsampled_try3_peak_198	379	16.8468	37.9453	35.2413	125
chr1	20503791	20504167	Project004-IPSHOCH-Exp5-ChIP-ES-CTCF-IP-Blobel-Rep2-S1_S2_MACS2_rendition_1E-8_downsampled_try3_peak_199	790	25.9459	79.0852	75.8808	205
chr1	20534651	20534917	Project004-IPSHOCH-Exp5-ChIP-ES-CTCF-IP-Blobel-Rep2-S1_S2_MACS2_rendition_1E-8_downsampled_try3_peak_200	281	9.66102	28.1988	25.6216	141
chr1	20544499	20545025	Project004-IPSHOCH-Exp5-ChIP-ES-CTCF-IP-Blobel-Rep2-S1_S2_MACS2_rendition_1E-8_downsampled_try3_peak_201	1164	29.6875	116.429	112.714	182
chr1	20602803	20603279	Project004-IPSHOCH-Exp5-ChIP-ES-CTCF-IP-Blobel-Rep2-S1_S2_MACS2_rendition_1E-8_downsampled_try3_peak_202	929	22.1186	92.9226	89.5334	161
chr1	20690099	20690464	Project004-IPSHOCH-Exp5-ChIP-ES-CTCF-IP-Blobel-Rep2-S1_S2_MACS2_rendition_1E-8_downsampled_try3_peak_203	790	25.9459	79.0852	75.8808	189
chr1	20723759	20723954	Project004-IPSHOCH-Exp5-ChIP-ES-CTCF-IP-Blobel-Rep2-S1_S2_MACS2_rendition_1E-8_downsampled_try3_peak_204	228	10.5405	22.8938	20.394	118
chr1	20728630	20728882	Project004-IPSHOCH-Exp5-ChIP-ES-CTCF-IP-Blobel-Rep2-S1_S2_MACS2_rendition_1E-8_downsampled_try3_peak_205	292	13.2098	29.2008	26.611	133
chr1	20741189	20741491	Project004-IPSHOCH-Exp5-ChIP-ES-CTCF-IP-Blobel-Rep2-S1_S2_MACS2_rendition_1E-8_downsampled_try3_peak_206	400	16.8574	40.0625	37.3378	142
chr1	20752345	20752640	Project004-IPSHOCH-Exp5-ChIP-ES-CTCF-IP-Blobel-Rep2-S1_S2_MACS2_rendition_1E-8_downsampled_try3_peak_207	399	12.2034	39.9077	37.1832	166
chr1	20791874	20792125	Project004-IPSHOCH-Exp5-ChIP-ES-CTCF-IP-Blobel-Rep2-S1_S2_MACS2_rendition_1E-8_downsampled_try3_peak_208	281	9.66102	28.1988	25.6216	108
chr1	20881052	20881346	Project004-IPSHOCH-Exp5-ChIP-ES-CTCF-IP-Blobel-Rep2-S1_S2_MACS2_rendition_1E-8_downsampled_try3_peak_209	788	27.9392	78.8247	75.6248	137
chr1	20915500	20915709	Project004-IPSHOCH-Exp5-ChIP-ES-CTCF-IP-Blobel-Rep2-S1_S2_MACS2_rendition_1E-8_downsampled_try3_peak_210	204	9.72973	20.4115	17.9517	68
chr1	20923545	20923899	Project004-IPSHOCH-Exp5-ChIP-ES-CTCF-IP-Blobel-Rep2-S1_S2_MACS2_rendition_1E-8_downsampled_try3_peak_211	640	25.015	64.0869	61.0712	158
chr1	20929101	20929478	Project004-IPSHOCH-Exp5-ChIP-ES-CTCF-IP-Blobel-Rep2-S1_S2_MACS2_rendition_1E-8_downsampled_try3_peak_212	447	17.027	44.7837	42	204
chr1	20930243	20930463	Project004-IPSHOCH-Exp5-ChIP-ES-CTCF-IP-Blobel-Rep2-S1_S2_MACS2_rendition_1E-8_downsampled_try3_peak_213	144	6.875	14.4294	12.0758	101
chr1	20933095	20933448	Project004-IPSHOCH-Exp5-ChIP-ES-CTCF-IP-Blobel-Rep2-S1_S2_MACS2_rendition_1E-8_downsampled_try3_peak_214	437	17.765	43.7935	41.0234	208
chr1	20964812	20965079	Project004-IPSHOCH-Exp5-ChIP-ES-CTCF-IP-Blobel-Rep2-S1_S2_MACS2_rendition_1E-8_downsampled_try3_peak_215	307	13.7402	30.727	28.1149	132
chr1	21070595	21070808	Project004-IPSHOCH-Exp5-ChIP-ES-CTCF-IP-Blobel-Rep2-S1_S2_MACS2_rendition_1E-8_downsampled_try3_peak_216	230	9.375	23.0745	20.5725	87
chr1	21091317	21091686	Project004-IPSHOCH-Exp5-ChIP-ES-CTCF-IP-Blobel-Rep2-S1_S2_MACS2_rendition_1E-8_downsampled_try3_peak_217	940	28.9749	94.0193	90.6219	188
chr1	21151904	21152289	Project004-IPSHOCH-Exp5-ChIP-ES-CTCF-IP-Blobel-Rep2-S1_S2_MACS2_rendition_1E-8_downsampled_try3_peak_218	1170	36.2872	117.099	113.367	192
chr1	21156258	21156685	Project004-IPSHOCH-Exp5-ChIP-ES-CTCF-IP-Blobel-Rep2-S1_S2_MACS2_rendition_1E-8_downsampled_try3_peak_219	1693	53.0257	169.369	164.85	193
chr1	21203584	21203991	Project004-IPSHOCH-Exp5-ChIP-ES-CTCF-IP-Blobel-Rep2-S1_S2_MACS2_rendition_1E-8_downsampled_try3_peak_220	1282	37.7916	128.297	124.403	218
chr1	21208437	21208922	Project004-IPSHOCH-Exp5-ChIP-ES-CTCF-IP-Blobel-Rep2-S1_S2_MACS2_rendition_1E-8_downsampled_try3_peak_221	1423	30.2542	142.393	138.282	228
chr1	21256851	21257204	Project004-IPSHOCH-Exp5-ChIP-ES-CTCF-IP-Blobel-Rep2-S1_S2_MACS2_rendition_1E-8_downsampled_try3_peak_222	280	12.1622	28.0497	25.4743	221
chr1	21261578	21261786	Project004-IPSHOCH-Exp5-ChIP-ES-CTCF-IP-Blobel-Rep2-S1_S2_MACS2_rendition_1E-8_downsampled_try3_peak_223	362	14.5946	36.202	33.5264	110
chr1	21266268	21266620	Project004-IPSHOCH-Exp5-ChIP-ES-CTCF-IP-Blobel-Rep2-S1_S2_MACS2_rendition_1E-8_downsampled_try3_peak_224	982	30.8084	98.259	94.7995	179
chr1	21334399	21334769	Project004-IPSHOCH-Exp5-ChIP-ES-CTCF-IP-Blobel-Rep2-S1_S2_MACS2_rendition_1E-8_downsampled_try3_peak_225	907	28.7838	90.7481	87.3883	196
chr1	21384314	21384527	Project004-IPSHOCH-Exp5-ChIP-ES-CTCF-IP-Blobel-Rep2-S1_S2_MACS2_rendition_1E-8_downsampled_try3_peak_226	216	10.1351	21.6442	19.1647	128
chr1	21401230	21401721	Project004-IPSHOCH-Exp5-ChIP-ES-CTCF-IP-Blobel-Rep2-S1_S2_MACS2_rendition_1E-8_downsampled_try3_peak_227	770	19.322	77.013	73.8385	258
chr1	21409517	21409859	Project004-IPSHOCH-Exp5-ChIP-ES-CTCF-IP-Blobel-Rep2-S1_S2_MACS2_rendition_1E-8_downsampled_try3_peak_228	315	12.7176	31.5727	28.9552	139
chr1	21451116	21451591	Project004-IPSHOCH-Exp5-ChIP-ES-CTCF-IP-Blobel-Rep2-S1_S2_MACS2_rendition_1E-8_downsampled_try3_peak_229	1313	32.5	131.347	127.404	230
chr1	21512237	21512459	Project004-IPSHOCH-Exp5-ChIP-ES-CTCF-IP-Blobel-Rep2-S1_S2_MACS2_rendition_1E-8_downsampled_try3_peak_230	292	13.2098	29.2008	26.611	83
chr1	21950781	21950973	Project004-IPSHOCH-Exp5-ChIP-ES-CTCF-IP-Blobel-Rep2-S1_S2_MACS2_rendition_1E-8_downsampled_try3_peak_231	191	10.2102	19.1475	16.7048	100
chr1	21951422	21951698	Project004-IPSHOCH-Exp5-ChIP-ES-CTCF-IP-Blobel-Rep2-S1_S2_MACS2_rendition_1E-8_downsampled_try3_peak_232	146	7.8048	14.6991	12.3384	161
chr1	21957310	21957502	Project004-IPSHOCH-Exp5-ChIP-ES-CTCF-IP-Blobel-Rep2-S1_S2_MACS2_rendition_1E-8_downsampled_try3_peak_233	260	12.7628	26.0473	23.4987	121
chr1	22095619	22095934	Project004-IPSHOCH-Exp5-ChIP-ES-CTCF-IP-Blobel-Rep2-S1_S2_MACS2_rendition_1E-8_downsampled_try3_peak_234	442	18.8889	44.2197	41.4423	145
chr1	22259034	22259480	Project004-IPSHOCH-Exp5-ChIP-ES-CTCF-IP-Blobel-Rep2-S1_S2_MACS2_rendition_1E-8_downsampled_try3_peak_235	1096	33.2432	109.667	106.044	196
chr1	22348424	22348602	Project004-IPSHOCH-Exp5-ChIP-ES-CTCF-IP-Blobel-Rep2-S1_S2_MACS2_rendition_1E-8_downsampled_try3_peak_236	156	8.67136	15.6771	13.2948	81
chr1	22367700	22368090	Project004-IPSHOCH-Exp5-ChIP-ES-CTCF-IP-Blobel-Rep2-S1_S2_MACS2_rendition_1E-8_downsampled_try3_peak_237	470	19.2697	47.0981	44.2886	250
chr1	22376490	22376794	Project004-IPSHOCH-Exp5-ChIP-ES-CTCF-IP-Blobel-Rep2-S1_S2_MACS2_rendition_1E-8_downsampled_try3_peak_238	469	15.3125	46.9413	44.133	157
chr1	22399056	22399292	Project004-IPSHOCH-Exp5-ChIP-ES-CTCF-IP-Blobel-Rep2-S1_S2_MACS2_rendition_1E-8_downsampled_try3_peak_239	168	8.51351	16.8225	14.4184	123
chr1	22494123	22494559	Project004-IPSHOCH-Exp5-ChIP-ES-CTCF-IP-Blobel-Rep2-S1_S2_MACS2_rendition_1E-8_downsampled_try3_peak_240	727	27.5676	72.7582	69.6309	243
chr1	22547370	22547687	Project004-IPSHOCH-Exp5-ChIP-ES-CTCF-IP-Blobel-Rep2-S1_S2_MACS2_rendition_1E-8_downsampled_try3_peak_241	204	10.7207	20.4889	18.022	85
chr1	22611251	22611572	Project004-IPSHOCH-Exp5-ChIP-ES-CTCF-IP-Blobel-Rep2-S1_S2_MACS2_rendition_1E-8_downsampled_try3_peak_242	556	22.4625	55.6352	52.719	96
chr1	23068868	23069145	Project004-IPSHOCH-Exp5-ChIP-ES-CTCF-IP-Blobel-Rep2-S1_S2_MACS2_rendition_1E-8_downsampled_try3_peak_243	591	16.017	59.107	56.1509	136
chr1	23175350	23175691	Project004-IPSHOCH-Exp5-ChIP-ES-CTCF-IP-Blobel-Rep2-S1_S2_MACS2_rendition_1E-8_downsampled_try3_peak_244	658	25.5255	65.8043	62.7688	182
chr1	23293626	23293988	Project004-IPSHOCH-Exp5-ChIP-ES-CTCF-IP-Blobel-Rep2-S1_S2_MACS2_rendition_1E-8_downsampled_try3_peak_245	725	24.3243	72.5667	69.4469	157
chr1	23331103	23331395	Project004-IPSHOCH-Exp5-ChIP-ES-CTCF-IP-Blobel-Rep2-S1_S2_MACS2_rendition_1E-8_downsampled_try3_peak_246	507	18.6486	50.7125	47.8566	142
chr1	23502181	23502556	Project004-IPSHOCH-Exp5-ChIP-ES-CTCF-IP-Blobel-Rep2-S1_S2_MACS2_rendition_1E-8_downsampled_try3_peak_247	260	12.7628	26.0473	23.4987	265
chr1	23616949	23617161	Project004-IPSHOCH-Exp5-ChIP-ES-CTCF-IP-Blobel-Rep2-S1_S2_MACS2_rendition_1E-8_downsampled_try3_peak_248	248	12.0435	24.8463	22.3158	119
chr1	23681861	23682179	Project004-IPSHOCH-Exp5-ChIP-ES-CTCF-IP-Blobel-Rep2-S1_S2_MACS2_rendition_1E-8_downsampled_try3_peak_249	191	10.2102	19.1475	16.7048	131
chr1	23691396	23691615	Project004-IPSHOCH-Exp5-ChIP-ES-CTCF-IP-Blobel-Rep2-S1_S2_MACS2_rendition_1E-8_downsampled_try3_peak_250	230	9.375	23.0745	20.5725	61
chr1	23712361	23712711	Project004-IPSHOCH-Exp5-ChIP-ES-CTCF-IP-Blobel-Rep2-S1_S2_MACS2_rendition_1E-8_downsampled_try3_peak_251	840	27.1622	84.0452	80.7743	207
chr1	23769556	23770021	Project004-IPSHOCH-Exp5-ChIP-ES-CTCF-IP-Blobel-Rep2-S1_S2_MACS2_rendition_1E-8_downsampled_try3_peak_252	1414	34.375	141.481	137.387	232
chr1	23799563	23800030	Project004-IPSHOCH-Exp5-ChIP-ES-CTCF-IP-Blobel-Rep2-S1_S2_MACS2_rendition_1E-8_downsampled_try3_peak_253	1230	30.9375	123.016	119.199	247
chr1	23833850	23834331	Project004-IPSHOCH-Exp5-ChIP-ES-CTCF-IP-Blobel-Rep2-S1_S2_MACS2_rendition_1E-8_downsampled_try3_peak_254	925	33.1832	92.5134	89.1277	269
chr1	23912946	23913260	Project004-IPSHOCH-Exp5-ChIP-ES-CTCF-IP-Blobel-Rep2-S1_S2_MACS2_rendition_1E-8_downsampled_try3_peak_255	474	19.9099	47.4277	44.6113	176
chr1	23966347	23966642	Project004-IPSHOCH-Exp5-ChIP-ES-CTCF-IP-Blobel-Rep2-S1_S2_MACS2_rendition_1E-8_downsampled_try3_peak_256	254	11.3514	25.4413	22.9023	150
chr1	24002358	24002571	Project004-IPSHOCH-Exp5-ChIP-ES-CTCF-IP-Blobel-Rep2-S1_S2_MACS2_rendition_1E-8_downsampled_try3_peak_257	246	12.2523	24.6304	22.1021	89
chr1	24008435	24008598	Project004-IPSHOCH-Exp5-ChIP-ES-CTCF-IP-Blobel-Rep2-S1_S2_MACS2_rendition_1E-8_downsampled_try3_peak_258	149	8.48269	14.9322	12.5691	60
chr1	24141745	24142092	Project004-IPSHOCH-Exp5-ChIP-ES-CTCF-IP-Blobel-Rep2-S1_S2_MACS2_rendition_1E-8_downsampled_try3_peak_259	871	28.9433	87.1594	83.8502	158
chr1	24143998	24144349	Project004-IPSHOCH-Exp5-ChIP-ES-CTCF-IP-Blobel-Rep2-S1_S2_MACS2_rendition_1E-8_downsampled_try3_peak_260	1695	48.3829	169.547	165.026	173
chr1	24178306	24178683	Project004-IPSHOCH-Exp5-ChIP-ES-CTCF-IP-Blobel-Rep2-S1_S2_MACS2_rendition_1E-8_downsampled_try3_peak_261	758	25.1351	75.8121	72.6496	200
chr1	24182065	24182228	Project004-IPSHOCH-Exp5-ChIP-ES-CTCF-IP-Blobel-Rep2-S1_S2_MACS2_rendition_1E-8_downsampled_try3_peak_262	154	7.1875	15.4506	13.074	76
chr1	24255951	24256335	Project004-IPSHOCH-Exp5-ChIP-ES-CTCF-IP-Blobel-Rep2-S1_S2_MACS2_rendition_1E-8_downsampled_try3_peak_263	916	30.9748	91.6367	88.2683	221
chr1	24263353	24263582	Project004-IPSHOCH-Exp5-ChIP-ES-CTCF-IP-Blobel-Rep2-S1_S2_MACS2_rendition_1E-8_downsampled_try3_peak_264	134	6.5625	13.4274	11.0925	144
chr1	24304313	24304510	Project004-IPSHOCH-Exp5-ChIP-ES-CTCF-IP-Blobel-Rep2-S1_S2_MACS2_rendition_1E-8_downsampled_try3_peak_265	202	10.6051	20.2969	17.8414	121
chr1	24307602	24307879	Project004-IPSHOCH-Exp5-ChIP-ES-CTCF-IP-Blobel-Rep2-S1_S2_MACS2_rendition_1E-8_downsampled_try3_peak_266	536	21.3194	53.6936	50.8095	123
chr1	24309431	24309934	Project004-IPSHOCH-Exp5-ChIP-ES-CTCF-IP-Blobel-Rep2-S1_S2_MACS2_rendition_1E-8_downsampled_try3_peak_267	1205	39.5028	120.537	116.759	276
chr1	24344435	24344724	Project004-IPSHOCH-Exp5-ChIP-ES-CTCF-IP-Blobel-Rep2-S1_S2_MACS2_rendition_1E-8_downsampled_try3_peak_268	523	21.4414	52.3213	49.4467	148
chr1	24374430	24374848	Project004-IPSHOCH-Exp5-ChIP-ES-CTCF-IP-Blobel-Rep2-S1_S2_MACS2_rendition_1E-8_downsampled_try3_peak_269	652	19.375	65.2077	62.179	154
chr1	24381779	24382052	Project004-IPSHOCH-Exp5-ChIP-ES-CTCF-IP-Blobel-Rep2-S1_S2_MACS2_rendition_1E-8_downsampled_try3_peak_270	351	12.5	35.1463	32.4769	145
chr1	24385369	24385642	Project004-IPSHOCH-Exp5-ChIP-ES-CTCF-IP-Blobel-Rep2-S1_S2_MACS2_rendition_1E-8_downsampled_try3_peak_271	321	13.8237	32.1694	29.5389	146
chr1	24640585	24640944	Project004-IPSHOCH-Exp5-ChIP-ES-CTCF-IP-Blobel-Rep2-S1_S2_MACS2_rendition_1E-8_downsampled_try3_peak_272	888	32.1622	88.8575	85.5268	197
chr1	24685185	24685655	Project004-IPSHOCH-Exp5-ChIP-ES-CTCF-IP-Blobel-Rep2-S1_S2_MACS2_rendition_1E-8_downsampled_try3_peak_273	1771	53.4734	177.187	172.558	239
chr1	24738344	24738537	Project004-IPSHOCH-Exp5-ChIP-ES-CTCF-IP-Blobel-Rep2-S1_S2_MACS2_rendition_1E-8_downsampled_try3_peak_274	185	9.56575	18.576	16.1463	125
chr1	24773732	24773971	Project004-IPSHOCH-Exp5-ChIP-ES-CTCF-IP-Blobel-Rep2-S1_S2_MACS2_rendition_1E-8_downsampled_try3_peak_275	189	6.85714	18.9049	16.471	142
chr1	24776462	24776839	Project004-IPSHOCH-Exp5-ChIP-ES-CTCF-IP-Blobel-Rep2-S1_S2_MACS2_rendition_1E-8_downsampled_try3_peak_276	265	10.3125	26.5652	24.012	198
chr1	24958163	24958504	Project004-IPSHOCH-Exp5-ChIP-ES-CTCF-IP-Blobel-Rep2-S1_S2_MACS2_rendition_1E-8_downsampled_try3_peak_277	834	30.6306	83.4254	80.1636	144
chr1	25528528	25528780	Project004-IPSHOCH-Exp5-ChIP-ES-CTCF-IP-Blobel-Rep2-S1_S2_MACS2_rendition_1E-8_downsampled_try3_peak_278	303	14.2943	30.3973	27.7914	120
chr1	25567184	25567623	Project004-IPSHOCH-Exp5-ChIP-ES-CTCF-IP-Blobel-Rep2-S1_S2_MACS2_rendition_1E-8_downsampled_try3_peak_279	755	21.5625	75.5477	72.391	161
chr1	25573373	25573553	Project004-IPSHOCH-Exp5-ChIP-ES-CTCF-IP-Blobel-Rep2-S1_S2_MACS2_rendition_1E-8_downsampled_try3_peak_280	87	5	8.73763	6.52764	65
chr1	25583932	25584118	Project004-IPSHOCH-Exp5-ChIP-ES-CTCF-IP-Blobel-Rep2-S1_S2_MACS2_rendition_1E-8_downsampled_try3_peak_281	168	8.51351	16.8225	14.4184	67
chr1	25673878	25674132	Project004-IPSHOCH-Exp5-ChIP-ES-CTCF-IP-Blobel-Rep2-S1_S2_MACS2_rendition_1E-8_downsampled_try3_peak_282	306	13.6654	30.6011	27.9927	106
chr1	25753638	25753983	Project004-IPSHOCH-Exp5-ChIP-ES-CTCF-IP-Blobel-Rep2-S1_S2_MACS2_rendition_1E-8_downsampled_try3_peak_283	442	18.8889	44.2197	41.4423	153
chr1	25883612	25883986	Project004-IPSHOCH-Exp5-ChIP-ES-CTCF-IP-Blobel-Rep2-S1_S2_MACS2_rendition_1E-8_downsampled_try3_peak_284	1007	30.5411	100.789	97.2952	203
chr1	25941961	25942262	Project004-IPSHOCH-Exp5-ChIP-ES-CTCF-IP-Blobel-Rep2-S1_S2_MACS2_rendition_1E-8_downsampled_try3_peak_285	526	19.3066	52.6589	49.7791	153
chr1	26104750	26104913	Project004-IPSHOCH-Exp5-ChIP-ES-CTCF-IP-Blobel-Rep2-S1_S2_MACS2_rendition_1E-8_downsampled_try3_peak_286	140	8.16817	14.0041	11.6555	123
chr1	26581448	26581625	Project004-IPSHOCH-Exp5-ChIP-ES-CTCF-IP-Blobel-Rep2-S1_S2_MACS2_rendition_1E-8_downsampled_try3_peak_287	156	6.61017	15.6784	13.2953	81
chr1	26885269	26885440	Project004-IPSHOCH-Exp5-ChIP-ES-CTCF-IP-Blobel-Rep2-S1_S2_MACS2_rendition_1E-8_downsampled_try3_peak_288	156	8.10811	15.6651	13.2839	96
chr1	26956799	26956976	Project004-IPSHOCH-Exp5-ChIP-ES-CTCF-IP-Blobel-Rep2-S1_S2_MACS2_rendition_1E-8_downsampled_try3_peak_289	152	8.67868	15.2542	12.8807	127
chr1	26959192	26959386	Project004-IPSHOCH-Exp5-ChIP-ES-CTCF-IP-Blobel-Rep2-S1_S2_MACS2_rendition_1E-8_downsampled_try3_peak_290	179	8.91892	17.9999	15.5739	111
chr1	27182866	27183029	Project004-IPSHOCH-Exp5-ChIP-ES-CTCF-IP-Blobel-Rep2-S1_S2_MACS2_rendition_1E-8_downsampled_try3_peak_291	152	8.67868	15.2542	12.8807	97
chr1	27957213	27957493	Project004-IPSHOCH-Exp5-ChIP-ES-CTCF-IP-Blobel-Rep2-S1_S2_MACS2_rendition_1E-8_downsampled_try3_peak_292	348	15.0319	34.8852	32.2197	119
chr1	28449007	28449196	Project004-IPSHOCH-Exp5-ChIP-ES-CTCF-IP-Blobel-Rep2-S1_S2_MACS2_rendition_1E-8_downsampled_try3_peak_293	191	10.2102	19.1475	16.7048	96
chr1	28488068	28488271	Project004-IPSHOCH-Exp5-ChIP-ES-CTCF-IP-Blobel-Rep2-S1_S2_MACS2_rendition_1E-8_downsampled_try3_peak_294	274	13.2733	27.4811	24.914	74
chr1	29216974	29217239	Project004-IPSHOCH-Exp5-ChIP-ES-CTCF-IP-Blobel-Rep2-S1_S2_MACS2_rendition_1E-8_downsampled_try3_peak_295	232	11.7417	23.2312	20.7218	134
chr1	29310881	29311044	Project004-IPSHOCH-Exp5-ChIP-ES-CTCF-IP-Blobel-Rep2-S1_S2_MACS2_rendition_1E-8_downsampled_try3_peak_296	152	8.67868	15.2542	12.8807	94
chr1	29623034	29623223	Project004-IPSHOCH-Exp5-ChIP-ES-CTCF-IP-Blobel-Rep2-S1_S2_MACS2_rendition_1E-8_downsampled_try3_peak_297	178	9.6997	17.8272	15.4061	119
chr1	30201964	30202187	Project004-IPSHOCH-Exp5-ChIP-ES-CTCF-IP-Blobel-Rep2-S1_S2_MACS2_rendition_1E-8_downsampled_try3_peak_298	228	10.5405	22.8938	20.394	100
chr1	30316427	30316807	Project004-IPSHOCH-Exp5-ChIP-ES-CTCF-IP-Blobel-Rep2-S1_S2_MACS2_rendition_1E-8_downsampled_try3_peak_299	619	24.2403	61.9283	58.9409	161
chr1	30560171	30560378	Project004-IPSHOCH-Exp5-ChIP-ES-CTCF-IP-Blobel-Rep2-S1_S2_MACS2_rendition_1E-8_downsampled_try3_peak_300	246	12.2523	24.6304	22.1021	110
chr1	30641736	30642092	Project004-IPSHOCH-Exp5-ChIP-ES-CTCF-IP-Blobel-Rep2-S1_S2_MACS2_rendition_1E-8_downsampled_try3_peak_301	1168	39.8198	116.889	113.16	157
chr1	30653030	30653324	Project004-IPSHOCH-Exp5-ChIP-ES-CTCF-IP-Blobel-Rep2-S1_S2_MACS2_rendition_1E-8_downsampled_try3_peak_302	333	15.3153	33.3743	30.7315	144
chr1	30753199	30753518	Project004-IPSHOCH-Exp5-ChIP-ES-CTCF-IP-Blobel-Rep2-S1_S2_MACS2_rendition_1E-8_downsampled_try3_peak_303	448	13.2203	44.8531	42.0682	175
chr1	30757266	30757594	Project004-IPSHOCH-Exp5-ChIP-ES-CTCF-IP-Blobel-Rep2-S1_S2_MACS2_rendition_1E-8_downsampled_try3_peak_304	658	25.5255	65.8043	62.7688	151
chr1	30797741	30798023	Project004-IPSHOCH-Exp5-ChIP-ES-CTCF-IP-Blobel-Rep2-S1_S2_MACS2_rendition_1E-8_downsampled_try3_peak_305	348	15.8258	34.8843	32.2196	129
chr1	30828705	30828981	Project004-IPSHOCH-Exp5-ChIP-ES-CTCF-IP-Blobel-Rep2-S1_S2_MACS2_rendition_1E-8_downsampled_try3_peak_306	333	15.3153	33.3743	30.7315	135
chr1	30835436	30835990	Project004-IPSHOCH-Exp5-ChIP-ES-CTCF-IP-Blobel-Rep2-S1_S2_MACS2_rendition_1E-8_downsampled_try3_peak_307	1532	47.6925	153.291	149.015	252
chr1	30837139	30837453	Project004-IPSHOCH-Exp5-ChIP-ES-CTCF-IP-Blobel-Rep2-S1_S2_MACS2_rendition_1E-8_downsampled_try3_peak_308	861	23.75	86.1941	82.8961	152
chr1	30977637	30977945	Project004-IPSHOCH-Exp5-ChIP-ES-CTCF-IP-Blobel-Rep2-S1_S2_MACS2_rendition_1E-8_downsampled_try3_peak_309	371	12.8396	37.1483	34.4596	161
chr1	30987763	30988049	Project004-IPSHOCH-Exp5-ChIP-ES-CTCF-IP-Blobel-Rep2-S1_S2_MACS2_rendition_1E-8_downsampled_try3_peak_310	404	15.8108	40.4434	37.7123	123
chr1	31005233	31005505	Project004-IPSHOCH-Exp5-ChIP-ES-CTCF-IP-Blobel-Rep2-S1_S2_MACS2_rendition_1E-8_downsampled_try3_peak_311	486	13.9831	48.6494	45.8216	126
chr1	31209991	31210162	Project004-IPSHOCH-Exp5-ChIP-ES-CTCF-IP-Blobel-Rep2-S1_S2_MACS2_rendition_1E-8_downsampled_try3_peak_312	151	8.63725	15.1861	12.8217	50
chr1	31210831	31211197	Project004-IPSHOCH-Exp5-ChIP-ES-CTCF-IP-Blobel-Rep2-S1_S2_MACS2_rendition_1E-8_downsampled_try3_peak_313	1022	33.7079	102.298	98.7817	189
chr1	31266996	31267326	Project004-IPSHOCH-Exp5-ChIP-ES-CTCF-IP-Blobel-Rep2-S1_S2_MACS2_rendition_1E-8_downsampled_try3_peak_314	873	27.973	87.3842	84.0695	161
chr1	31393999	31394283	Project004-IPSHOCH-Exp5-ChIP-ES-CTCF-IP-Blobel-Rep2-S1_S2_MACS2_rendition_1E-8_downsampled_try3_peak_315	348	15.8258	34.8843	32.2196	156
chr1	31892261	31892424	Project004-IPSHOCH-Exp5-ChIP-ES-CTCF-IP-Blobel-Rep2-S1_S2_MACS2_rendition_1E-8_downsampled_try3_peak_316	127	7.65766	12.7801	10.457	80
chr1	31948851	31949084	Project004-IPSHOCH-Exp5-ChIP-ES-CTCF-IP-Blobel-Rep2-S1_S2_MACS2_rendition_1E-8_downsampled_try3_peak_317	204	10.7207	20.4889	18.022	117
chr1	32052732	32053011	Project004-IPSHOCH-Exp5-ChIP-ES-CTCF-IP-Blobel-Rep2-S1_S2_MACS2_rendition_1E-8_downsampled_try3_peak_318	442	18.8889	44.2197	41.4423	134
chr1	32231449	32231612	Project004-IPSHOCH-Exp5-ChIP-ES-CTCF-IP-Blobel-Rep2-S1_S2_MACS2_rendition_1E-8_downsampled_try3_peak_319	178	9.6997	17.8272	15.4061	105
chr1	32757003	32757370	Project004-IPSHOCH-Exp5-ChIP-ES-CTCF-IP-Blobel-Rep2-S1_S2_MACS2_rendition_1E-8_downsampled_try3_peak_320	822	29.3863	82.2295	78.9857	152
chr1	33021862	33022188	Project004-IPSHOCH-Exp5-ChIP-ES-CTCF-IP-Blobel-Rep2-S1_S2_MACS2_rendition_1E-8_downsampled_try3_peak_321	890	28.3784	89.0631	85.7257	152
chr1	33079770	33080049	Project004-IPSHOCH-Exp5-ChIP-ES-CTCF-IP-Blobel-Rep2-S1_S2_MACS2_rendition_1E-8_downsampled_try3_peak_322	584	19.8244	58.4923	55.5447	147
chr1	33353096	33353287	Project004-IPSHOCH-Exp5-ChIP-ES-CTCF-IP-Blobel-Rep2-S1_S2_MACS2_rendition_1E-8_downsampled_try3_peak_323	134	6.5625	13.4274	11.0925	78
chr1	33593548	33593818	Project004-IPSHOCH-Exp5-ChIP-ES-CTCF-IP-Blobel-Rep2-S1_S2_MACS2_rendition_1E-8_downsampled_try3_peak_324	410	17.8679	41.0581	38.3178	120
chr1	33622579	33623024	Project004-IPSHOCH-Exp5-ChIP-ES-CTCF-IP-Blobel-Rep2-S1_S2_MACS2_rendition_1E-8_downsampled_try3_peak_325	1572	48.6559	157.232	152.894	222
chr1	33653921	33654212	Project004-IPSHOCH-Exp5-ChIP-ES-CTCF-IP-Blobel-Rep2-S1_S2_MACS2_rendition_1E-8_downsampled_try3_peak_326	442	18.8889	44.2197	41.4423	172
chr1	33720037	33720348	Project004-IPSHOCH-Exp5-ChIP-ES-CTCF-IP-Blobel-Rep2-S1_S2_MACS2_rendition_1E-8_downsampled_try3_peak_327	888	29.3753	88.8732	85.5416	177
chr1	33727232	33727468	Project004-IPSHOCH-Exp5-ChIP-ES-CTCF-IP-Blobel-Rep2-S1_S2_MACS2_rendition_1E-8_downsampled_try3_peak_328	338	12.1875	33.886	31.2347	127
chr1	33729377	33729685	Project004-IPSHOCH-Exp5-ChIP-ES-CTCF-IP-Blobel-Rep2-S1_S2_MACS2_rendition_1E-8_downsampled_try3_peak_329	725	24.3243	72.5667	69.4469	162
chr1	33741303	33741669	Project004-IPSHOCH-Exp5-ChIP-ES-CTCF-IP-Blobel-Rep2-S1_S2_MACS2_rendition_1E-8_downsampled_try3_peak_330	1284	42.8829	128.466	124.565	185
chr1	33796114	33796680	Project004-IPSHOCH-Exp5-ChIP-ES-CTCF-IP-Blobel-Rep2-S1_S2_MACS2_rendition_1E-8_downsampled_try3_peak_331	1540	43.5426	154.069	149.786	299
chr1	33799688	33800403	Project004-IPSHOCH-Exp5-ChIP-ES-CTCF-IP-Blobel-Rep2-S1_S2_MACS2_rendition_1E-8_downsampled_try3_peak_332	1381	42.829	138.176	134.134	179
chr1	33806027	33806256	Project004-IPSHOCH-Exp5-ChIP-ES-CTCF-IP-Blobel-Rep2-S1_S2_MACS2_rendition_1E-8_downsampled_try3_peak_333	175	7.8125	17.5473	15.1358	120
chr1	33866969	33867150	Project004-IPSHOCH-Exp5-ChIP-ES-CTCF-IP-Blobel-Rep2-S1_S2_MACS2_rendition_1E-8_downsampled_try3_peak_334	159	7.99801	15.9496	13.5649	111
chr1	33903653	33904015	Project004-IPSHOCH-Exp5-ChIP-ES-CTCF-IP-Blobel-Rep2-S1_S2_MACS2_rendition_1E-8_downsampled_try3_peak_335	351	12.5	35.1463	32.4769	223
chr1	33932561	33933065	Project004-IPSHOCH-Exp5-ChIP-ES-CTCF-IP-Blobel-Rep2-S1_S2_MACS2_rendition_1E-8_downsampled_try3_peak_336	1530	42.973	153.059	148.786	174
chr1	33940395	33940613	Project004-IPSHOCH-Exp5-ChIP-ES-CTCF-IP-Blobel-Rep2-S1_S2_MACS2_rendition_1E-8_downsampled_try3_peak_337	231	10.0251	23.1349	20.6321	117
chr1	33949625	33950200	Project004-IPSHOCH-Exp5-ChIP-ES-CTCF-IP-Blobel-Rep2-S1_S2_MACS2_rendition_1E-8_downsampled_try3_peak_338	1145	33.6735	114.588	110.903	178
chr1	33964311	33964677	Project004-IPSHOCH-Exp5-ChIP-ES-CTCF-IP-Blobel-Rep2-S1_S2_MACS2_rendition_1E-8_downsampled_try3_peak_339	838	23.4801	83.817	80.5526	206
chr1	34000820	34001216	Project004-IPSHOCH-Exp5-ChIP-ES-CTCF-IP-Blobel-Rep2-S1_S2_MACS2_rendition_1E-8_downsampled_try3_peak_340	738	26.1351	73.8984	70.7658	227
chr1	34004788	34005030	Project004-IPSHOCH-Exp5-ChIP-ES-CTCF-IP-Blobel-Rep2-S1_S2_MACS2_rendition_1E-8_downsampled_try3_peak_341	241	10.9459	24.1597	21.6411	90
chr1	34021512	34021781	Project004-IPSHOCH-Exp5-ChIP-ES-CTCF-IP-Blobel-Rep2-S1_S2_MACS2_rendition_1E-8_downsampled_try3_peak_342	566	17.5	56.6146	53.6917	126
chr1	34023167	34023656	Project004-IPSHOCH-Exp5-ChIP-ES-CTCF-IP-Blobel-Rep2-S1_S2_MACS2_rendition_1E-8_downsampled_try3_peak_343	908	24.6875	90.8436	87.4807	193
chr1	34062503	34062819	Project004-IPSHOCH-Exp5-ChIP-ES-CTCF-IP-Blobel-Rep2-S1_S2_MACS2_rendition_1E-8_downsampled_try3_peak_344	474	11.4815	47.4833	44.6668	179
chr1	34067882	34068175	Project004-IPSHOCH-Exp5-ChIP-ES-CTCF-IP-Blobel-Rep2-S1_S2_MACS2_rendition_1E-8_downsampled_try3_peak_345	507	18.6486	50.7125	47.8566	136
chr1	34107348	34107527	Project004-IPSHOCH-Exp5-ChIP-ES-CTCF-IP-Blobel-Rep2-S1_S2_MACS2_rendition_1E-8_downsampled_try3_peak_346	168	8.51351	16.8225	14.4184	87
chr1	34118014	34118238	Project004-IPSHOCH-Exp5-ChIP-ES-CTCF-IP-Blobel-Rep2-S1_S2_MACS2_rendition_1E-8_downsampled_try3_peak_347	466	18.5748	46.6818	43.8778	129
chr1	34125153	34125574	Project004-IPSHOCH-Exp5-ChIP-ES-CTCF-IP-Blobel-Rep2-S1_S2_MACS2_rendition_1E-8_downsampled_try3_peak_348	1079	24.661	107.91	104.317	205
chr1	34150517	34150839	Project004-IPSHOCH-Exp5-ChIP-ES-CTCF-IP-Blobel-Rep2-S1_S2_MACS2_rendition_1E-8_downsampled_try3_peak_349	848	29.8344	84.8762	81.5978	161
chr1	34153255	34153470	Project004-IPSHOCH-Exp5-ChIP-ES-CTCF-IP-Blobel-Rep2-S1_S2_MACS2_rendition_1E-8_downsampled_try3_peak_350	168	8.51351	16.8225	14.4184	99
chr1	34174601	34174917	Project004-IPSHOCH-Exp5-ChIP-ES-CTCF-IP-Blobel-Rep2-S1_S2_MACS2_rendition_1E-8_downsampled_try3_peak_351	173	9.11023	17.3301	14.9216	113
chr1	34221527	34221956	Project004-IPSHOCH-Exp5-ChIP-ES-CTCF-IP-Blobel-Rep2-S1_S2_MACS2_rendition_1E-8_downsampled_try3_peak_352	931	25.3839	93.1565	89.7664	155
chr1	34225396	34225625	Project004-IPSHOCH-Exp5-ChIP-ES-CTCF-IP-Blobel-Rep2-S1_S2_MACS2_rendition_1E-8_downsampled_try3_peak_353	165	8.89694	16.5039	14.1137	116
chr1	34231824	34232065	Project004-IPSHOCH-Exp5-ChIP-ES-CTCF-IP-Blobel-Rep2-S1_S2_MACS2_rendition_1E-8_downsampled_try3_peak_354	196	9.9133	19.6627	17.2129	119
chr1	34246806	34247242	Project004-IPSHOCH-Exp5-ChIP-ES-CTCF-IP-Blobel-Rep2-S1_S2_MACS2_rendition_1E-8_downsampled_try3_peak_355	1512	42.5676	151.2	146.955	173
chr1	34258377	34258713	Project004-IPSHOCH-Exp5-ChIP-ES-CTCF-IP-Blobel-Rep2-S1_S2_MACS2_rendition_1E-8_downsampled_try3_peak_356	437	17.765	43.7935	41.0234	150
chr1	34275095	34275665	Project004-IPSHOCH-Exp5-ChIP-ES-CTCF-IP-Blobel-Rep2-S1_S2_MACS2_rendition_1E-8_downsampled_try3_peak_357	1662	49.1953	166.268	161.795	277
chr1	34466801	34467099	Project004-IPSHOCH-Exp5-ChIP-ES-CTCF-IP-Blobel-Rep2-S1_S2_MACS2_rendition_1E-8_downsampled_try3_peak_358	600	23.1236	60.0284	57.0621	137
chr1	34498898	34499105	Project004-IPSHOCH-Exp5-ChIP-ES-CTCF-IP-Blobel-Rep2-S1_S2_MACS2_rendition_1E-8_downsampled_try3_peak_359	164	7.5	16.4902	14.1	108
chr1	34519750	34519996	Project004-IPSHOCH-Exp5-ChIP-ES-CTCF-IP-Blobel-Rep2-S1_S2_MACS2_rendition_1E-8_downsampled_try3_peak_360	563	21.9078	56.3092	53.3899	135
chr1	34542710	34543110	Project004-IPSHOCH-Exp5-ChIP-ES-CTCF-IP-Blobel-Rep2-S1_S2_MACS2_rendition_1E-8_downsampled_try3_peak_361	526	19.3066	52.6589	49.7791	187
chr1	34544331	34544586	Project004-IPSHOCH-Exp5-ChIP-ES-CTCF-IP-Blobel-Rep2-S1_S2_MACS2_rendition_1E-8_downsampled_try3_peak_362	253	10	25.3882	22.8526	116
chr1	34567930	34568403	Project004-IPSHOCH-Exp5-ChIP-ES-CTCF-IP-Blobel-Rep2-S1_S2_MACS2_rendition_1E-8_downsampled_try3_peak_363	1033	23.8983	103.365	99.8378	158
chr1	34598099	34598339	Project004-IPSHOCH-Exp5-ChIP-ES-CTCF-IP-Blobel-Rep2-S1_S2_MACS2_rendition_1E-8_downsampled_try3_peak_364	152	8.67868	15.2542	12.8807	122
chr1	34640944	34641228	Project004-IPSHOCH-Exp5-ChIP-ES-CTCF-IP-Blobel-Rep2-S1_S2_MACS2_rendition_1E-8_downsampled_try3_peak_365	267	11.7568	26.7382	24.1807	126
chr1	34659133	34659584	Project004-IPSHOCH-Exp5-ChIP-ES-CTCF-IP-Blobel-Rep2-S1_S2_MACS2_rendition_1E-8_downsampled_try3_peak_366	1567	43.7838	156.789	152.459	282
chr1	34699258	34699717	Project004-IPSHOCH-Exp5-ChIP-ES-CTCF-IP-Blobel-Rep2-S1_S2_MACS2_rendition_1E-8_downsampled_try3_peak_367	1418	27	141.857	137.759	219
chr1	34757570	34757949	Project004-IPSHOCH-Exp5-ChIP-ES-CTCF-IP-Blobel-Rep2-S1_S2_MACS2_rendition_1E-8_downsampled_try3_peak_368	700	18.0509	70.0029	66.9143	150
chr1	34795150	34795572	Project004-IPSHOCH-Exp5-ChIP-ES-CTCF-IP-Blobel-Rep2-S1_S2_MACS2_rendition_1E-8_downsampled_try3_peak_369	1581	50.5405	158.19	153.839	241
chr1	34832417	34832677	Project004-IPSHOCH-Exp5-ChIP-ES-CTCF-IP-Blobel-Rep2-S1_S2_MACS2_rendition_1E-8_downsampled_try3_peak_370	274	13.2733	27.4811	24.914	139
chr1	34833327	34833626	Project004-IPSHOCH-Exp5-ChIP-ES-CTCF-IP-Blobel-Rep2-S1_S2_MACS2_rendition_1E-8_downsampled_try3_peak_371	289	13.7838	28.9313	26.346	148
chr1	34848682	34848867	Project004-IPSHOCH-Exp5-ChIP-ES-CTCF-IP-Blobel-Rep2-S1_S2_MACS2_rendition_1E-8_downsampled_try3_peak_372	112	6.48649	11.2573	8.9767	92
chr1	34924025	34924560	Project004-IPSHOCH-Exp5-ChIP-ES-CTCF-IP-Blobel-Rep2-S1_S2_MACS2_rendition_1E-8_downsampled_try3_peak_373	1045	21.6429	104.559	101.012	167
chr1	34948419	34948728	Project004-IPSHOCH-Exp5-ChIP-ES-CTCF-IP-Blobel-Rep2-S1_S2_MACS2_rendition_1E-8_downsampled_try3_peak_374	538	15	53.8199	50.9289	152
chr1	34950674	34950893	Project004-IPSHOCH-Exp5-ChIP-ES-CTCF-IP-Blobel-Rep2-S1_S2_MACS2_rendition_1E-8_downsampled_try3_peak_375	219	9.0625	21.9387	19.4486	147
chr1	34953820	34954103	Project004-IPSHOCH-Exp5-ChIP-ES-CTCF-IP-Blobel-Rep2-S1_S2_MACS2_rendition_1E-8_downsampled_try3_peak_376	474	19.9099	47.4277	44.6113	131
chr1	35045161	35045335	Project004-IPSHOCH-Exp5-ChIP-ES-CTCF-IP-Blobel-Rep2-S1_S2_MACS2_rendition_1E-8_downsampled_try3_peak_377	165	9.18919	16.529	14.131	62
chr1	35089497	35089792	Project004-IPSHOCH-Exp5-ChIP-ES-CTCF-IP-Blobel-Rep2-S1_S2_MACS2_rendition_1E-8_downsampled_try3_peak_378	265	10.3125	26.5652	24.012	157
chr1	35323547	35323819	Project004-IPSHOCH-Exp5-ChIP-ES-CTCF-IP-Blobel-Rep2-S1_S2_MACS2_rendition_1E-8_downsampled_try3_peak_379	893	31.3132	89.3139	85.972	131
chr1	35442192	35442753	Project004-IPSHOCH-Exp5-ChIP-ES-CTCF-IP-Blobel-Rep2-S1_S2_MACS2_rendition_1E-8_downsampled_try3_peak_380	1483	35.625	148.316	144.115	229
chr1	35444985	35445463	Project004-IPSHOCH-Exp5-ChIP-ES-CTCF-IP-Blobel-Rep2-S1_S2_MACS2_rendition_1E-8_downsampled_try3_peak_381	712	16.5	71.2845	68.1776	218
chr1	35449358	35449630	Project004-IPSHOCH-Exp5-ChIP-ES-CTCF-IP-Blobel-Rep2-S1_S2_MACS2_rendition_1E-8_downsampled_try3_peak_382	303	14.2943	30.3973	27.7914	85
chr1	35504264	35504453	Project004-IPSHOCH-Exp5-ChIP-ES-CTCF-IP-Blobel-Rep2-S1_S2_MACS2_rendition_1E-8_downsampled_try3_peak_383	267	11.7568	26.7382	24.1807	113
chr1	35522003	35522249	Project004-IPSHOCH-Exp5-ChIP-ES-CTCF-IP-Blobel-Rep2-S1_S2_MACS2_rendition_1E-8_downsampled_try3_peak_384	474	19.9099	47.4277	44.6113	103
chr1	35535162	35535591	Project004-IPSHOCH-Exp5-ChIP-ES-CTCF-IP-Blobel-Rep2-S1_S2_MACS2_rendition_1E-8_downsampled_try3_peak_385	1044	32.027	104.44	100.893	148
chr1	35552317	35552486	Project004-IPSHOCH-Exp5-ChIP-ES-CTCF-IP-Blobel-Rep2-S1_S2_MACS2_rendition_1E-8_downsampled_try3_peak_386	127	7.65766	12.7801	10.457	84
chr1	35772807	35773298	Project004-IPSHOCH-Exp5-ChIP-ES-CTCF-IP-Blobel-Rep2-S1_S2_MACS2_rendition_1E-8_downsampled_try3_peak_387	924	29.1892	92.4393	89.0591	215
chr1	35783487	35783872	Project004-IPSHOCH-Exp5-ChIP-ES-CTCF-IP-Blobel-Rep2-S1_S2_MACS2_rendition_1E-8_downsampled_try3_peak_388	1419	40.5405	141.967	137.864	160
chr1	35822487	35822729	Project004-IPSHOCH-Exp5-ChIP-ES-CTCF-IP-Blobel-Rep2-S1_S2_MACS2_rendition_1E-8_downsampled_try3_peak_389	290	13.4888	29.0465	26.4576	123
chr1	35840360	35840574	Project004-IPSHOCH-Exp5-ChIP-ES-CTCF-IP-Blobel-Rep2-S1_S2_MACS2_rendition_1E-8_downsampled_try3_peak_390	274	13.2733	27.4811	24.914	126
chr1	35896258	35896768	Project004-IPSHOCH-Exp5-ChIP-ES-CTCF-IP-Blobel-Rep2-S1_S2_MACS2_rendition_1E-8_downsampled_try3_peak_391	1381	37.7787	138.109	134.067	250
chr1	35903418	35903749	Project004-IPSHOCH-Exp5-ChIP-ES-CTCF-IP-Blobel-Rep2-S1_S2_MACS2_rendition_1E-8_downsampled_try3_peak_392	946	32.7585	94.6971	91.284	175
chr1	36067040	36067343	Project004-IPSHOCH-Exp5-ChIP-ES-CTCF-IP-Blobel-Rep2-S1_S2_MACS2_rendition_1E-8_downsampled_try3_peak_393	416	14.0625	41.603	38.8581	162
chr1	36121651	36122119	Project004-IPSHOCH-Exp5-ChIP-ES-CTCF-IP-Blobel-Rep2-S1_S2_MACS2_rendition_1E-8_downsampled_try3_peak_394	1204	35.1775	120.437	116.662	255
chr1	36163811	36164109	Project004-IPSHOCH-Exp5-ChIP-ES-CTCF-IP-Blobel-Rep2-S1_S2_MACS2_rendition_1E-8_downsampled_try3_peak_395	134	6.5625	13.4274	11.0925	48
chr1	36191444	36191796	Project004-IPSHOCH-Exp5-ChIP-ES-CTCF-IP-Blobel-Rep2-S1_S2_MACS2_rendition_1E-8_downsampled_try3_peak_396	1762	53.609	176.237	171.625	193
chr1	36201928	36202378	Project004-IPSHOCH-Exp5-ChIP-ES-CTCF-IP-Blobel-Rep2-S1_S2_MACS2_rendition_1E-8_downsampled_try3_peak_397	506	20.9309	50.6795	47.8272	121
chr1	36206320	36206618	Project004-IPSHOCH-Exp5-ChIP-ES-CTCF-IP-Blobel-Rep2-S1_S2_MACS2_rendition_1E-8_downsampled_try3_peak_398	682	23.4144	68.2896	65.2226	151
chr1	36309584	36310182	Project004-IPSHOCH-Exp5-ChIP-ES-CTCF-IP-Blobel-Rep2-S1_S2_MACS2_rendition_1E-8_downsampled_try3_peak_399	1492	45.3425	149.239	145.03	301
chr1	36311495	36311849	Project004-IPSHOCH-Exp5-ChIP-ES-CTCF-IP-Blobel-Rep2-S1_S2_MACS2_rendition_1E-8_downsampled_try3_peak_400	988	23.1356	98.861	95.3927	161
chr1	36313064	36313436	Project004-IPSHOCH-Exp5-ChIP-ES-CTCF-IP-Blobel-Rep2-S1_S2_MACS2_rendition_1E-8_downsampled_try3_peak_401	525	14.7458	52.516	49.638	212
chr1	36334109	36334557	Project004-IPSHOCH-Exp5-ChIP-ES-CTCF-IP-Blobel-Rep2-S1_S2_MACS2_rendition_1E-8_downsampled_try3_peak_402	1814	49.054	181.414	176.724	183
chr1	36336052	36336576	Project004-IPSHOCH-Exp5-ChIP-ES-CTCF-IP-Blobel-Rep2-S1_S2_MACS2_rendition_1E-8_downsampled_try3_peak_403	1074	22.0714	107.453	103.865	170
chr1	36367441	36367731	Project004-IPSHOCH-Exp5-ChIP-ES-CTCF-IP-Blobel-Rep2-S1_S2_MACS2_rendition_1E-8_downsampled_try3_peak_404	214	9.7252	21.4906	19.015	148
chr1	36378628	36378935	Project004-IPSHOCH-Exp5-ChIP-ES-CTCF-IP-Blobel-Rep2-S1_S2_MACS2_rendition_1E-8_downsampled_try3_peak_405	522	19.0541	52.2186	49.3492	211
chr1	36380717	36381227	Project004-IPSHOCH-Exp5-ChIP-ES-CTCF-IP-Blobel-Rep2-S1_S2_MACS2_rendition_1E-8_downsampled_try3_peak_406	752	27.4593	75.2581	72.1061	363
chr1	36428539	36428776	Project004-IPSHOCH-Exp5-ChIP-ES-CTCF-IP-Blobel-Rep2-S1_S2_MACS2_rendition_1E-8_downsampled_try3_peak_407	259	11.6738	25.9912	23.4493	110
chr1	36501736	36501899	Project004-IPSHOCH-Exp5-ChIP-ES-CTCF-IP-Blobel-Rep2-S1_S2_MACS2_rendition_1E-8_downsampled_try3_peak_408	105	5.625	10.5451	8.2763	119
chr1	36511292	36511707	Project004-IPSHOCH-Exp5-ChIP-ES-CTCF-IP-Blobel-Rep2-S1_S2_MACS2_rendition_1E-8_downsampled_try3_peak_409	952	33.6324	95.2164	91.8005	145
chr1	36549360	36549575	Project004-IPSHOCH-Exp5-ChIP-ES-CTCF-IP-Blobel-Rep2-S1_S2_MACS2_rendition_1E-8_downsampled_try3_peak_410	293	9.91525	29.3234	26.7326	115
chr1	36553682	36553942	Project004-IPSHOCH-Exp5-ChIP-ES-CTCF-IP-Blobel-Rep2-S1_S2_MACS2_rendition_1E-8_downsampled_try3_peak_411	313	11.5625	31.3987	28.7817	131
chr1	36558134	36558601	Project004-IPSHOCH-Exp5-ChIP-ES-CTCF-IP-Blobel-Rep2-S1_S2_MACS2_rendition_1E-8_downsampled_try3_peak_412	1483	35.625	148.316	144.115	205
chr1	36568175	36568685	Project004-IPSHOCH-Exp5-ChIP-ES-CTCF-IP-Blobel-Rep2-S1_S2_MACS2_rendition_1E-8_downsampled_try3_peak_413	1050	30.6718	105.058	101.507	158
chr1	36570553	36571007	Project004-IPSHOCH-Exp5-ChIP-ES-CTCF-IP-Blobel-Rep2-S1_S2_MACS2_rendition_1E-8_downsampled_try3_peak_414	672	17.5424	67.2407	64.1902	200
chr1	36602697	36603060	Project004-IPSHOCH-Exp5-ChIP-ES-CTCF-IP-Blobel-Rep2-S1_S2_MACS2_rendition_1E-8_downsampled_try3_peak_415	460	18.6261	46.0073	43.2098	145
chr1	36603951	36604453	Project004-IPSHOCH-Exp5-ChIP-ES-CTCF-IP-Blobel-Rep2-S1_S2_MACS2_rendition_1E-8_downsampled_try3_peak_416	1860	43.8645	186.093	181.341	273
chr1	36608744	36608947	Project004-IPSHOCH-Exp5-ChIP-ES-CTCF-IP-Blobel-Rep2-S1_S2_MACS2_rendition_1E-8_downsampled_try3_peak_417	148	8.15481	14.8297	12.4678	150
chr1	36613848	36614367	Project004-IPSHOCH-Exp5-ChIP-ES-CTCF-IP-Blobel-Rep2-S1_S2_MACS2_rendition_1E-8_downsampled_try3_peak_418	2232	51.8449	223.238	218.042	254
chr1	36672862	36673155	Project004-IPSHOCH-Exp5-ChIP-ES-CTCF-IP-Blobel-Rep2-S1_S2_MACS2_rendition_1E-8_downsampled_try3_peak_419	645	22.2973	64.5809	61.5577	141
chr1	36691761	36692207	Project004-IPSHOCH-Exp5-ChIP-ES-CTCF-IP-Blobel-Rep2-S1_S2_MACS2_rendition_1E-8_downsampled_try3_peak_420	1132	22.9286	113.289	109.611	232
chr1	36721376	36721616	Project004-IPSHOCH-Exp5-ChIP-ES-CTCF-IP-Blobel-Rep2-S1_S2_MACS2_rendition_1E-8_downsampled_try3_peak_421	175	7.8125	17.5473	15.1358	104
chr1	36734900	36735165	Project004-IPSHOCH-Exp5-ChIP-ES-CTCF-IP-Blobel-Rep2-S1_S2_MACS2_rendition_1E-8_downsampled_try3_peak_422	142	7.77583	14.2065	11.8556	128
chr1	36740883	36741325	Project004-IPSHOCH-Exp5-ChIP-ES-CTCF-IP-Blobel-Rep2-S1_S2_MACS2_rendition_1E-8_downsampled_try3_peak_423	1296	28.2203	129.631	125.72	213
chr1	36766158	36766374	Project004-IPSHOCH-Exp5-ChIP-ES-CTCF-IP-Blobel-Rep2-S1_S2_MACS2_rendition_1E-8_downsampled_try3_peak_424	267	11.7568	26.7382	24.1807	84
chr1	36794082	36794548	Project004-IPSHOCH-Exp5-ChIP-ES-CTCF-IP-Blobel-Rep2-S1_S2_MACS2_rendition_1E-8_downsampled_try3_peak_425	1251	40.9378	125.126	121.28	269
chr1	36801431	36801849	Project004-IPSHOCH-Exp5-ChIP-ES-CTCF-IP-Blobel-Rep2-S1_S2_MACS2_rendition_1E-8_downsampled_try3_peak_426	1440	42.3299	144.002	139.869	207
chr1	36803301	36803707	Project004-IPSHOCH-Exp5-ChIP-ES-CTCF-IP-Blobel-Rep2-S1_S2_MACS2_rendition_1E-8_downsampled_try3_peak_427	1624	45	162.415	157.993	210
chr1	36841355	36841888	Project004-IPSHOCH-Exp5-ChIP-ES-CTCF-IP-Blobel-Rep2-S1_S2_MACS2_rendition_1E-8_downsampled_try3_peak_428	892	24.375	89.2882	85.9475	284
chr1	36843154	36843653	Project004-IPSHOCH-Exp5-ChIP-ES-CTCF-IP-Blobel-Rep2-S1_S2_MACS2_rendition_1E-8_downsampled_try3_peak_429	1009	29.0011	100.992	97.4933	273
chr1	36862417	36862581	Project004-IPSHOCH-Exp5-ChIP-ES-CTCF-IP-Blobel-Rep2-S1_S2_MACS2_rendition_1E-8_downsampled_try3_peak_430	147	6.35593	14.7288	12.3673	120
chr1	36878859	36879104	Project004-IPSHOCH-Exp5-ChIP-ES-CTCF-IP-Blobel-Rep2-S1_S2_MACS2_rendition_1E-8_downsampled_try3_peak_431	206	9.85869	20.63	18.1623	156
chr1	36881610	36881840	Project004-IPSHOCH-Exp5-ChIP-ES-CTCF-IP-Blobel-Rep2-S1_S2_MACS2_rendition_1E-8_downsampled_try3_peak_432	320	13.3784	32.0676	29.4379	91
chr1	36889996	36890213	Project004-IPSHOCH-Exp5-ChIP-ES-CTCF-IP-Blobel-Rep2-S1_S2_MACS2_rendition_1E-8_downsampled_try3_peak_433	264	11.2214	26.4179	23.8676	124
chr1	36904945	36905237	Project004-IPSHOCH-Exp5-ChIP-ES-CTCF-IP-Blobel-Rep2-S1_S2_MACS2_rendition_1E-8_downsampled_try3_peak_434	588	20.9497	58.8113	55.8621	134
chr1	36960983	36961226	Project004-IPSHOCH-Exp5-ChIP-ES-CTCF-IP-Blobel-Rep2-S1_S2_MACS2_rendition_1E-8_downsampled_try3_peak_435	285	11.7592	28.5972	26.0189	132
chr1	36986941	36987108	Project004-IPSHOCH-Exp5-ChIP-ES-CTCF-IP-Blobel-Rep2-S1_S2_MACS2_rendition_1E-8_downsampled_try3_peak_436	189	8.58359	18.9479	16.5138	91
chr1	36989920	36990258	Project004-IPSHOCH-Exp5-ChIP-ES-CTCF-IP-Blobel-Rep2-S1_S2_MACS2_rendition_1E-8_downsampled_try3_peak_437	290	12.0232	29.0632	26.4743	179
chr1	36994592	36994760	Project004-IPSHOCH-Exp5-ChIP-ES-CTCF-IP-Blobel-Rep2-S1_S2_MACS2_rendition_1E-8_downsampled_try3_peak_438	191	8.97711	19.1227	16.687	120
chr1	37167778	37168044	Project004-IPSHOCH-Exp5-ChIP-ES-CTCF-IP-Blobel-Rep2-S1_S2_MACS2_rendition_1E-8_downsampled_try3_peak_439	307	12.973	30.7148	28.1028	159
chr1	37189334	37189563	Project004-IPSHOCH-Exp5-ChIP-ES-CTCF-IP-Blobel-Rep2-S1_S2_MACS2_rendition_1E-8_downsampled_try3_peak_440	351	11.1864	35.1054	32.4384	142
chr1	37208835	37209032	Project004-IPSHOCH-Exp5-ChIP-ES-CTCF-IP-Blobel-Rep2-S1_S2_MACS2_rendition_1E-8_downsampled_try3_peak_441	330	15.1502	33.0963	30.46	112
chr1	37251438	37251762	Project004-IPSHOCH-Exp5-ChIP-ES-CTCF-IP-Blobel-Rep2-S1_S2_MACS2_rendition_1E-8_downsampled_try3_peak_442	924	29.1892	92.4393	89.0591	149
chr1	37268691	37268931	Project004-IPSHOCH-Exp5-ChIP-ES-CTCF-IP-Blobel-Rep2-S1_S2_MACS2_rendition_1E-8_downsampled_try3_peak_443	342	15.0687	34.2734	31.6198	130
chr1	37307537	37307931	Project004-IPSHOCH-Exp5-ChIP-ES-CTCF-IP-Blobel-Rep2-S1_S2_MACS2_rendition_1E-8_downsampled_try3_peak_444	1171	26.1864	117.119	113.386	173
chr1	37315373	37315625	Project004-IPSHOCH-Exp5-ChIP-ES-CTCF-IP-Blobel-Rep2-S1_S2_MACS2_rendition_1E-8_downsampled_try3_peak_445	510	18.403	51.0759	48.2162	128
chr1	37329352	37329704	Project004-IPSHOCH-Exp5-ChIP-ES-CTCF-IP-Blobel-Rep2-S1_S2_MACS2_rendition_1E-8_downsampled_try3_peak_446	1096	33.2432	109.667	106.044	154
chr1	37458498	37458920	Project004-IPSHOCH-Exp5-ChIP-ES-CTCF-IP-Blobel-Rep2-S1_S2_MACS2_rendition_1E-8_downsampled_try3_peak_447	916	30.9748	91.6367	88.2683	218
chr1	37476193	37476751	Project004-IPSHOCH-Exp5-ChIP-ES-CTCF-IP-Blobel-Rep2-S1_S2_MACS2_rendition_1E-8_downsampled_try3_peak_448	2160	47.5	216.018	210.902	276
chr1	37505198	37505608	Project004-IPSHOCH-Exp5-ChIP-ES-CTCF-IP-Blobel-Rep2-S1_S2_MACS2_rendition_1E-8_downsampled_try3_peak_449	1561	50.03	156.176	151.854	210
chr1	37523558	37523783	Project004-IPSHOCH-Exp5-ChIP-ES-CTCF-IP-Blobel-Rep2-S1_S2_MACS2_rendition_1E-8_downsampled_try3_peak_450	204	10.7207	20.4889	18.022	93
chr1	37528654	37528890	Project004-IPSHOCH-Exp5-ChIP-ES-CTCF-IP-Blobel-Rep2-S1_S2_MACS2_rendition_1E-8_downsampled_try3_peak_451	318	14.8048	31.8784	29.254	98
chr1	37535979	37536251	Project004-IPSHOCH-Exp5-ChIP-ES-CTCF-IP-Blobel-Rep2-S1_S2_MACS2_rendition_1E-8_downsampled_try3_peak_452	387	14.0771	38.7888	36.0812	118
chr1	37595614	37595892	Project004-IPSHOCH-Exp5-ChIP-ES-CTCF-IP-Blobel-Rep2-S1_S2_MACS2_rendition_1E-8_downsampled_try3_peak_453	326	11.875	32.6367	30.0024	139
chr1	37691506	37691865	Project004-IPSHOCH-Exp5-ChIP-ES-CTCF-IP-Blobel-Rep2-S1_S2_MACS2_rendition_1E-8_downsampled_try3_peak_454	1175	35.327	117.526	113.792	184
chr1	37693153	37693343	Project004-IPSHOCH-Exp5-ChIP-ES-CTCF-IP-Blobel-Rep2-S1_S2_MACS2_rendition_1E-8_downsampled_try3_peak_455	294	12.9597	29.4094	26.8145	106
chr1	37696067	37696442	Project004-IPSHOCH-Exp5-ChIP-ES-CTCF-IP-Blobel-Rep2-S1_S2_MACS2_rendition_1E-8_downsampled_try3_peak_456	914	17.963	91.4592	88.092	160
chr1	37698928	37699139	Project004-IPSHOCH-Exp5-ChIP-ES-CTCF-IP-Blobel-Rep2-S1_S2_MACS2_rendition_1E-8_downsampled_try3_peak_457	191	10.2102	19.1475	16.7048	106
chr1	37710859	37711199	Project004-IPSHOCH-Exp5-ChIP-ES-CTCF-IP-Blobel-Rep2-S1_S2_MACS2_rendition_1E-8_downsampled_try3_peak_458	661	22.7027	66.1629	63.12	192
chr1	37711463	37711726	Project004-IPSHOCH-Exp5-ChIP-ES-CTCF-IP-Blobel-Rep2-S1_S2_MACS2_rendition_1E-8_downsampled_try3_peak_459	545	21.825	54.552	51.6525	115
chr1	37732299	37732610	Project004-IPSHOCH-Exp5-ChIP-ES-CTCF-IP-Blobel-Rep2-S1_S2_MACS2_rendition_1E-8_downsampled_try3_peak_460	735	26.9776	73.5338	70.4025	162
chr1	37735238	37735688	Project004-IPSHOCH-Exp5-ChIP-ES-CTCF-IP-Blobel-Rep2-S1_S2_MACS2_rendition_1E-8_downsampled_try3_peak_461	1171	26.1864	117.119	113.386	214
chr1	37747534	37747854	Project004-IPSHOCH-Exp5-ChIP-ES-CTCF-IP-Blobel-Rep2-S1_S2_MACS2_rendition_1E-8_downsampled_try3_peak_462	511	18.8958	51.1432	48.2826	157
chr1	37762012	37762237	Project004-IPSHOCH-Exp5-ChIP-ES-CTCF-IP-Blobel-Rep2-S1_S2_MACS2_rendition_1E-8_downsampled_try3_peak_463	204	9.72973	20.4115	17.9517	108
chr1	37765204	37765467	Project004-IPSHOCH-Exp5-ChIP-ES-CTCF-IP-Blobel-Rep2-S1_S2_MACS2_rendition_1E-8_downsampled_try3_peak_464	407	16.8539	40.7769	38.044	132
chr1	37776622	37776911	Project004-IPSHOCH-Exp5-ChIP-ES-CTCF-IP-Blobel-Rep2-S1_S2_MACS2_rendition_1E-8_downsampled_try3_peak_465	338	12.1875	33.886	31.2347	145
chr1	37859219	37859461	Project004-IPSHOCH-Exp5-ChIP-ES-CTCF-IP-Blobel-Rep2-S1_S2_MACS2_rendition_1E-8_downsampled_try3_peak_466	378	16.7664	37.8095	35.1125	122
chr1	37923937	37924367	Project004-IPSHOCH-Exp5-ChIP-ES-CTCF-IP-Blobel-Rep2-S1_S2_MACS2_rendition_1E-8_downsampled_try3_peak_467	1233	27.2034	123.343	119.524	169
chr1	37938709	37938918	Project004-IPSHOCH-Exp5-ChIP-ES-CTCF-IP-Blobel-Rep2-S1_S2_MACS2_rendition_1E-8_downsampled_try3_peak_468	250	11.8433	25.0904	22.5581	130
chr1	37948343	37948541	Project004-IPSHOCH-Exp5-ChIP-ES-CTCF-IP-Blobel-Rep2-S1_S2_MACS2_rendition_1E-8_downsampled_try3_peak_469	179	8.60306	17.9648	15.5427	93
chr1	37960125	37960368	Project004-IPSHOCH-Exp5-ChIP-ES-CTCF-IP-Blobel-Rep2-S1_S2_MACS2_rendition_1E-8_downsampled_try3_peak_470	307	12.973	30.7148	28.1028	87
chr1	37988594	37989026	Project004-IPSHOCH-Exp5-ChIP-ES-CTCF-IP-Blobel-Rep2-S1_S2_MACS2_rendition_1E-8_downsampled_try3_peak_471	522	19.0541	52.2186	49.3492	225
chr1	38030456	38030646	Project004-IPSHOCH-Exp5-ChIP-ES-CTCF-IP-Blobel-Rep2-S1_S2_MACS2_rendition_1E-8_downsampled_try3_peak_472	156	8.67136	15.6771	13.2948	75
chr1	38042550	38043042	Project004-IPSHOCH-Exp5-ChIP-ES-CTCF-IP-Blobel-Rep2-S1_S2_MACS2_rendition_1E-8_downsampled_try3_peak_473	1621	38.125	162.167	157.758	264
chr1	38054687	38054998	Project004-IPSHOCH-Exp5-ChIP-ES-CTCF-IP-Blobel-Rep2-S1_S2_MACS2_rendition_1E-8_downsampled_try3_peak_474	799	24.3466	79.9183	76.7025	149
chr1	38186781	38187193	Project004-IPSHOCH-Exp5-ChIP-ES-CTCF-IP-Blobel-Rep2-S1_S2_MACS2_rendition_1E-8_downsampled_try3_peak_475	1202	26.6949	120.223	116.454	208
chr1	38242315	38242892	Project004-IPSHOCH-Exp5-ChIP-ES-CTCF-IP-Blobel-Rep2-S1_S2_MACS2_rendition_1E-8_downsampled_try3_peak_476	1806	49.2935	180.643	175.963	226
chr1	38259670	38259983	Project004-IPSHOCH-Exp5-ChIP-ES-CTCF-IP-Blobel-Rep2-S1_S2_MACS2_rendition_1E-8_downsampled_try3_peak_477	906	26.0941	90.6928	87.3375	161
chr1	38309567	38309947	Project004-IPSHOCH-Exp5-ChIP-ES-CTCF-IP-Blobel-Rep2-S1_S2_MACS2_rendition_1E-8_downsampled_try3_peak_478	987	26.25	98.7009	95.2358	177
chr1	38364180	38364394	Project004-IPSHOCH-Exp5-ChIP-ES-CTCF-IP-Blobel-Rep2-S1_S2_MACS2_rendition_1E-8_downsampled_try3_peak_479	196	7.62712	19.6337	17.1839	113
chr1	38449894	38450094	Project004-IPSHOCH-Exp5-ChIP-ES-CTCF-IP-Blobel-Rep2-S1_S2_MACS2_rendition_1E-8_downsampled_try3_peak_480	147	6.35593	14.7288	12.3673	49
chr1	38696605	38696863	Project004-IPSHOCH-Exp5-ChIP-ES-CTCF-IP-Blobel-Rep2-S1_S2_MACS2_rendition_1E-8_downsampled_try3_peak_481	289	10.9375	28.9576	26.3703	115
chr1	38711844	38712108	Project004-IPSHOCH-Exp5-ChIP-ES-CTCF-IP-Blobel-Rep2-S1_S2_MACS2_rendition_1E-8_downsampled_try3_peak_482	303	14.2943	30.3973	27.7914	149
chr1	38777117	38777472	Project004-IPSHOCH-Exp5-ChIP-ES-CTCF-IP-Blobel-Rep2-S1_S2_MACS2_rendition_1E-8_downsampled_try3_peak_483	906	32.6727	90.6821	87.3269	210
chr1	38824726	38825075	Project004-IPSHOCH-Exp5-ChIP-ES-CTCF-IP-Blobel-Rep2-S1_S2_MACS2_rendition_1E-8_downsampled_try3_peak_484	1441	46.967	144.187	140.047	173
chr1	38826676	38827169	Project004-IPSHOCH-Exp5-ChIP-ES-CTCF-IP-Blobel-Rep2-S1_S2_MACS2_rendition_1E-8_downsampled_try3_peak_485	1003	23.3898	100.358	96.8671	254
chr1	38835211	38835440	Project004-IPSHOCH-Exp5-ChIP-ES-CTCF-IP-Blobel-Rep2-S1_S2_MACS2_rendition_1E-8_downsampled_try3_peak_486	204	9.72973	20.4115	17.9517	107
chr1	38844328	38844721	Project004-IPSHOCH-Exp5-ChIP-ES-CTCF-IP-Blobel-Rep2-S1_S2_MACS2_rendition_1E-8_downsampled_try3_peak_487	1027	31.6216	102.709	99.1861	155
chr1	38845736	38846167	Project004-IPSHOCH-Exp5-ChIP-ES-CTCF-IP-Blobel-Rep2-S1_S2_MACS2_rendition_1E-8_downsampled_try3_peak_488	784	19.5763	78.4324	75.2379	239
chr1	38856253	38856561	Project004-IPSHOCH-Exp5-ChIP-ES-CTCF-IP-Blobel-Rep2-S1_S2_MACS2_rendition_1E-8_downsampled_try3_peak_489	1198	34.8482	119.847	116.081	146
chr1	38891778	38892121	Project004-IPSHOCH-Exp5-ChIP-ES-CTCF-IP-Blobel-Rep2-S1_S2_MACS2_rendition_1E-8_downsampled_try3_peak_490	710	25.5087	71.0224	67.9196	157
chr1	38912929	38913451	Project004-IPSHOCH-Exp5-ChIP-ES-CTCF-IP-Blobel-Rep2-S1_S2_MACS2_rendition_1E-8_downsampled_try3_peak_491	1530	42.973	153.059	148.786	292
chr1	38919030	38919426	Project004-IPSHOCH-Exp5-ChIP-ES-CTCF-IP-Blobel-Rep2-S1_S2_MACS2_rendition_1E-8_downsampled_try3_peak_492	1512	42.5676	151.2	146.955	210
chr1	38991592	38991881	Project004-IPSHOCH-Exp5-ChIP-ES-CTCF-IP-Blobel-Rep2-S1_S2_MACS2_rendition_1E-8_downsampled_try3_peak_493	823	26.7568	82.3854	79.1371	132
chr1	38993610	38994080	Project004-IPSHOCH-Exp5-ChIP-ES-CTCF-IP-Blobel-Rep2-S1_S2_MACS2_rendition_1E-8_downsampled_try3_peak_494	795	16.2963	79.5333	76.3259	229
chr1	39058034	39058337	Project004-IPSHOCH-Exp5-ChIP-ES-CTCF-IP-Blobel-Rep2-S1_S2_MACS2_rendition_1E-8_downsampled_try3_peak_495	1000	29.5496	100.003	96.5195	147
chr1	39067522	39067893	Project004-IPSHOCH-Exp5-ChIP-ES-CTCF-IP-Blobel-Rep2-S1_S2_MACS2_rendition_1E-8_downsampled_try3_peak_496	718	15.1852	71.8011	68.6915	191
chr1	39105590	39105786	Project004-IPSHOCH-Exp5-ChIP-ES-CTCF-IP-Blobel-Rep2-S1_S2_MACS2_rendition_1E-8_downsampled_try3_peak_497	276	13.007	27.6304	25.0623	77
chr1	39237425	39237654	Project004-IPSHOCH-Exp5-ChIP-ES-CTCF-IP-Blobel-Rep2-S1_S2_MACS2_rendition_1E-8_downsampled_try3_peak_498	204	9.72973	20.4115	17.9517	147
chr1	39263805	39264097	Project004-IPSHOCH-Exp5-ChIP-ES-CTCF-IP-Blobel-Rep2-S1_S2_MACS2_rendition_1E-8_downsampled_try3_peak_499	512	19.4396	51.2866	48.4242	146
chr1	39274394	39274794	Project004-IPSHOCH-Exp5-ChIP-ES-CTCF-IP-Blobel-Rep2-S1_S2_MACS2_rendition_1E-8_downsampled_try3_peak_500	907	28.7838	90.7481	87.3883	204
chr1	39284667	39284834	Project004-IPSHOCH-Exp5-ChIP-ES-CTCF-IP-Blobel-Rep2-S1_S2_MACS2_rendition_1E-8_downsampled_try3_peak_501	140	8.16817	14.0041	11.6555	49
chr1	39286926	39287202	Project004-IPSHOCH-Exp5-ChIP-ES-CTCF-IP-Blobel-Rep2-S1_S2_MACS2_rendition_1E-8_downsampled_try3_peak_502	333	15.3153	33.3743	30.7315	132
chr1	39310689	39310915	Project004-IPSHOCH-Exp5-ChIP-ES-CTCF-IP-Blobel-Rep2-S1_S2_MACS2_rendition_1E-8_downsampled_try3_peak_503	320	13.3784	32.0676	29.4379	98
chr1	39397486	39397896	Project004-IPSHOCH-Exp5-ChIP-ES-CTCF-IP-Blobel-Rep2-S1_S2_MACS2_rendition_1E-8_downsampled_try3_peak_504	669	24.6796	66.9527	63.9042	248
chr1	39401937	39402127	Project004-IPSHOCH-Exp5-ChIP-ES-CTCF-IP-Blobel-Rep2-S1_S2_MACS2_rendition_1E-8_downsampled_try3_peak_505	176	7.11864	17.6258	15.2133	81
chr1	39409612	39409959	Project004-IPSHOCH-Exp5-ChIP-ES-CTCF-IP-Blobel-Rep2-S1_S2_MACS2_rendition_1E-8_downsampled_try3_peak_506	716	26.945	71.6959	68.5867	137
chr1	39419057	39419300	Project004-IPSHOCH-Exp5-ChIP-ES-CTCF-IP-Blobel-Rep2-S1_S2_MACS2_rendition_1E-8_downsampled_try3_peak_507	189	6.85714	18.9049	16.471	139
chr1	39447706	39448070	Project004-IPSHOCH-Exp5-ChIP-ES-CTCF-IP-Blobel-Rep2-S1_S2_MACS2_rendition_1E-8_downsampled_try3_peak_508	289	13.7838	28.9313	26.346	187
chr1	39448986	39449439	Project004-IPSHOCH-Exp5-ChIP-ES-CTCF-IP-Blobel-Rep2-S1_S2_MACS2_rendition_1E-8_downsampled_try3_peak_509	1662	52.5826	166.289	161.811	240
chr1	39473238	39473529	Project004-IPSHOCH-Exp5-ChIP-ES-CTCF-IP-Blobel-Rep2-S1_S2_MACS2_rendition_1E-8_downsampled_try3_peak_510	224	10.9323	22.4309	19.9374	138
chr1	39473733	39474101	Project004-IPSHOCH-Exp5-ChIP-ES-CTCF-IP-Blobel-Rep2-S1_S2_MACS2_rendition_1E-8_downsampled_try3_peak_511	254	11.3514	25.4413	22.9023	140
chr1	39485955	39486231	Project004-IPSHOCH-Exp5-ChIP-ES-CTCF-IP-Blobel-Rep2-S1_S2_MACS2_rendition_1E-8_downsampled_try3_peak_512	589	22.4765	58.9267	55.9773	132
chr1	39493839	39494012	Project004-IPSHOCH-Exp5-ChIP-ES-CTCF-IP-Blobel-Rep2-S1_S2_MACS2_rendition_1E-8_downsampled_try3_peak_513	204	9.72973	20.4115	17.9517	85
chr1	39553979	39554158	Project004-IPSHOCH-Exp5-ChIP-ES-CTCF-IP-Blobel-Rep2-S1_S2_MACS2_rendition_1E-8_downsampled_try3_peak_514	202	9.93578	20.2248	17.7696	78
chr1	39554590	39555040	Project004-IPSHOCH-Exp5-ChIP-ES-CTCF-IP-Blobel-Rep2-S1_S2_MACS2_rendition_1E-8_downsampled_try3_peak_515	831	23.125	83.1228	79.8667	255
chr1	39561168	39561459	Project004-IPSHOCH-Exp5-ChIP-ES-CTCF-IP-Blobel-Rep2-S1_S2_MACS2_rendition_1E-8_downsampled_try3_peak_516	626	24.1619	62.6341	59.6373	139
chr1	39579403	39579778	Project004-IPSHOCH-Exp5-ChIP-ES-CTCF-IP-Blobel-Rep2-S1_S2_MACS2_rendition_1E-8_downsampled_try3_peak_517	815	24.7046	81.5037	78.2719	214
chr1	39584194	39584681	Project004-IPSHOCH-Exp5-ChIP-ES-CTCF-IP-Blobel-Rep2-S1_S2_MACS2_rendition_1E-8_downsampled_try3_peak_518	1744	40.3125	174.472	169.879	284
chr1	39587062	39587526	Project004-IPSHOCH-Exp5-ChIP-ES-CTCF-IP-Blobel-Rep2-S1_S2_MACS2_rendition_1E-8_downsampled_try3_peak_519	1392	42.8181	139.266	135.205	259
chr1	39671653	39672146	Project004-IPSHOCH-Exp5-ChIP-ES-CTCF-IP-Blobel-Rep2-S1_S2_MACS2_rendition_1E-8_downsampled_try3_peak_520	880	28.3437	88.037	84.7158	314
chr1	39698486	39698883	Project004-IPSHOCH-Exp5-ChIP-ES-CTCF-IP-Blobel-Rep2-S1_S2_MACS2_rendition_1E-8_downsampled_try3_peak_521	614	21.4865	61.4404	58.4569	188
chr1	39707597	39708039	Project004-IPSHOCH-Exp5-ChIP-ES-CTCF-IP-Blobel-Rep2-S1_S2_MACS2_rendition_1E-8_downsampled_try3_peak_522	783	23.9885	78.3392	75.146	264
chr1	39737424	39737741	Project004-IPSHOCH-Exp5-ChIP-ES-CTCF-IP-Blobel-Rep2-S1_S2_MACS2_rendition_1E-8_downsampled_try3_peak_523	608	14.7857	60.8676	57.8921	149
chr1	39742706	39743107	Project004-IPSHOCH-Exp5-ChIP-ES-CTCF-IP-Blobel-Rep2-S1_S2_MACS2_rendition_1E-8_downsampled_try3_peak_524	908	24.6875	90.8436	87.4807	180
chr1	39818292	39818561	Project004-IPSHOCH-Exp5-ChIP-ES-CTCF-IP-Blobel-Rep2-S1_S2_MACS2_rendition_1E-8_downsampled_try3_peak_525	507	18.6486	50.7125	47.8566	145
chr1	39968392	39968723	Project004-IPSHOCH-Exp5-ChIP-ES-CTCF-IP-Blobel-Rep2-S1_S2_MACS2_rendition_1E-8_downsampled_try3_peak_526	1310	36.2825	131.012	127.08	169
chr1	39993331	39993753	Project004-IPSHOCH-Exp5-ChIP-ES-CTCF-IP-Blobel-Rep2-S1_S2_MACS2_rendition_1E-8_downsampled_try3_peak_527	1656	38.75	165.665	161.202	259
chr1	40033836	40033999	Project004-IPSHOCH-Exp5-ChIP-ES-CTCF-IP-Blobel-Rep2-S1_S2_MACS2_rendition_1E-8_downsampled_try3_peak_528	156	8.10811	15.6651	13.2839	83
chr1	40057809	40058137	Project004-IPSHOCH-Exp5-ChIP-ES-CTCF-IP-Blobel-Rep2-S1_S2_MACS2_rendition_1E-8_downsampled_try3_peak_529	512	14.4915	51.2195	48.3578	143
chr1	40152398	40152820	Project004-IPSHOCH-Exp5-ChIP-ES-CTCF-IP-Blobel-Rep2-S1_S2_MACS2_rendition_1E-8_downsampled_try3_peak_530	1058	34.6189	105.899	102.333	231
chr1	40172127	40172488	Project004-IPSHOCH-Exp5-ChIP-ES-CTCF-IP-Blobel-Rep2-S1_S2_MACS2_rendition_1E-8_downsampled_try3_peak_531	617	16.5254	61.792	58.8049	165
chr1	40173244	40173578	Project004-IPSHOCH-Exp5-ChIP-ES-CTCF-IP-Blobel-Rep2-S1_S2_MACS2_rendition_1E-8_downsampled_try3_peak_532	834	18.4286	83.4307	80.1684	187
chr1	40347546	40347769	Project004-IPSHOCH-Exp5-ChIP-ES-CTCF-IP-Blobel-Rep2-S1_S2_MACS2_rendition_1E-8_downsampled_try3_peak_533	307	13.3917	30.7825	28.1698	85
chr1	40350798	40351069	Project004-IPSHOCH-Exp5-ChIP-ES-CTCF-IP-Blobel-Rep2-S1_S2_MACS2_rendition_1E-8_downsampled_try3_peak_534	293	12.5676	29.3754	26.781	130
chr1	40435614	40435979	Project004-IPSHOCH-Exp5-ChIP-ES-CTCF-IP-Blobel-Rep2-S1_S2_MACS2_rendition_1E-8_downsampled_try3_peak_535	1359	29.2373	135.982	131.973	180
chr1	40436838	40437289	Project004-IPSHOCH-Exp5-ChIP-ES-CTCF-IP-Blobel-Rep2-S1_S2_MACS2_rendition_1E-8_downsampled_try3_peak_536	798	29.6096	79.8396	76.6257	246
chr1	40601493	40601844	Project004-IPSHOCH-Exp5-ChIP-ES-CTCF-IP-Blobel-Rep2-S1_S2_MACS2_rendition_1E-8_downsampled_try3_peak_537	537	19.4595	53.7338	50.8462	199
chr1	40636617	40637011	Project004-IPSHOCH-Exp5-ChIP-ES-CTCF-IP-Blobel-Rep2-S1_S2_MACS2_rendition_1E-8_downsampled_try3_peak_538	1202	35.6757	120.261	116.487	200
chr1	40714832	40715248	Project004-IPSHOCH-Exp5-ChIP-ES-CTCF-IP-Blobel-Rep2-S1_S2_MACS2_rendition_1E-8_downsampled_try3_peak_539	566	17.5	56.6146	53.6917	212
chr1	40820976	40821193	Project004-IPSHOCH-Exp5-ChIP-ES-CTCF-IP-Blobel-Rep2-S1_S2_MACS2_rendition_1E-8_downsampled_try3_peak_540	253	11.6637	25.3774	22.8437	106
chr1	40825479	40825843	Project004-IPSHOCH-Exp5-ChIP-ES-CTCF-IP-Blobel-Rep2-S1_S2_MACS2_rendition_1E-8_downsampled_try3_peak_541	715	25.7895	71.5035	68.3952	202
chr1	40854122	40854624	Project004-IPSHOCH-Exp5-ChIP-ES-CTCF-IP-Blobel-Rep2-S1_S2_MACS2_rendition_1E-8_downsampled_try3_peak_542	1461	47.4775	146.174	142.005	254
chr1	40859629	40860002	Project004-IPSHOCH-Exp5-ChIP-ES-CTCF-IP-Blobel-Rep2-S1_S2_MACS2_rendition_1E-8_downsampled_try3_peak_543	576	11.3592	57.6339	54.6971	195
chr1	40901463	40901851	Project004-IPSHOCH-Exp5-ChIP-ES-CTCF-IP-Blobel-Rep2-S1_S2_MACS2_rendition_1E-8_downsampled_try3_peak_544	1168	39.8198	116.889	113.16	203
chr1	40935883	40936278	Project004-IPSHOCH-Exp5-ChIP-ES-CTCF-IP-Blobel-Rep2-S1_S2_MACS2_rendition_1E-8_downsampled_try3_peak_545	1207	40.8408	120.727	116.942	196
chr1	40941758	40942160	Project004-IPSHOCH-Exp5-ChIP-ES-CTCF-IP-Blobel-Rep2-S1_S2_MACS2_rendition_1E-8_downsampled_try3_peak_546	727	27.5676	72.7582	69.6309	234
chr1	40944447	40944785	Project004-IPSHOCH-Exp5-ChIP-ES-CTCF-IP-Blobel-Rep2-S1_S2_MACS2_rendition_1E-8_downsampled_try3_peak_547	630	21.8919	63.0066	60.0042	183
chr1	41058496	41058696	Project004-IPSHOCH-Exp5-ChIP-ES-CTCF-IP-Blobel-Rep2-S1_S2_MACS2_rendition_1E-8_downsampled_try3_peak_548	186	7.37288	18.6225	16.19	100
chr1	41115153	41115460	Project004-IPSHOCH-Exp5-ChIP-ES-CTCF-IP-Blobel-Rep2-S1_S2_MACS2_rendition_1E-8_downsampled_try3_peak_549	390	15.4054	39.0183	36.3047	148
chr1	41162351	41162605	Project004-IPSHOCH-Exp5-ChIP-ES-CTCF-IP-Blobel-Rep2-S1_S2_MACS2_rendition_1E-8_downsampled_try3_peak_550	333	15.3153	33.3743	30.7315	97
chr1	41209400	41209727	Project004-IPSHOCH-Exp5-ChIP-ES-CTCF-IP-Blobel-Rep2-S1_S2_MACS2_rendition_1E-8_downsampled_try3_peak_551	364	16.3363	36.4081	33.724	136
chr1	41321064	41321409	Project004-IPSHOCH-Exp5-ChIP-ES-CTCF-IP-Blobel-Rep2-S1_S2_MACS2_rendition_1E-8_downsampled_try3_peak_552	502	20.2332	50.2712	47.4245	229
chr1	41331489	41331652	Project004-IPSHOCH-Exp5-ChIP-ES-CTCF-IP-Blobel-Rep2-S1_S2_MACS2_rendition_1E-8_downsampled_try3_peak_553	152	8.67868	15.2542	12.8807	72
chr1	41443321	41443646	Project004-IPSHOCH-Exp5-ChIP-ES-CTCF-IP-Blobel-Rep2-S1_S2_MACS2_rendition_1E-8_downsampled_try3_peak_554	624	23.5448	62.4305	59.4338	147
chr1	41867228	41867482	Project004-IPSHOCH-Exp5-ChIP-ES-CTCF-IP-Blobel-Rep2-S1_S2_MACS2_rendition_1E-8_downsampled_try3_peak_555	376	13.125	37.6986	35.0025	111
chr1	41954715	41954905	Project004-IPSHOCH-Exp5-ChIP-ES-CTCF-IP-Blobel-Rep2-S1_S2_MACS2_rendition_1E-8_downsampled_try3_peak_556	274	13.2733	27.4811	24.914	70
chr1	42018000	42018180	Project004-IPSHOCH-Exp5-ChIP-ES-CTCF-IP-Blobel-Rep2-S1_S2_MACS2_rendition_1E-8_downsampled_try3_peak_557	204	10.7207	20.4889	18.022	95
chr1	42217738	42217934	Project004-IPSHOCH-Exp5-ChIP-ES-CTCF-IP-Blobel-Rep2-S1_S2_MACS2_rendition_1E-8_downsampled_try3_peak_558	235	10.5719	23.5184	21.0071	106
chr1	42295267	42295604	Project004-IPSHOCH-Exp5-ChIP-ES-CTCF-IP-Blobel-Rep2-S1_S2_MACS2_rendition_1E-8_downsampled_try3_peak_559	589	23.4835	58.9881	56.0337	192
chr1	42571318	42571622	Project004-IPSHOCH-Exp5-ChIP-ES-CTCF-IP-Blobel-Rep2-S1_S2_MACS2_rendition_1E-8_downsampled_try3_peak_560	710	27.0571	71.0074	67.9055	148
chr1	42741652	42741994	Project004-IPSHOCH-Exp5-ChIP-ES-CTCF-IP-Blobel-Rep2-S1_S2_MACS2_rendition_1E-8_downsampled_try3_peak_561	831	30.4844	83.1753	79.9191	152
chr1	42743162	42743354	Project004-IPSHOCH-Exp5-ChIP-ES-CTCF-IP-Blobel-Rep2-S1_S2_MACS2_rendition_1E-8_downsampled_try3_peak_562	140	7.43951	14.0878	11.7379	113
chr1	42748072	42748442	Project004-IPSHOCH-Exp5-ChIP-ES-CTCF-IP-Blobel-Rep2-S1_S2_MACS2_rendition_1E-8_downsampled_try3_peak_563	939	25.3125	93.9706	90.5741	175
chr1	42771494	42771755	Project004-IPSHOCH-Exp5-ChIP-ES-CTCF-IP-Blobel-Rep2-S1_S2_MACS2_rendition_1E-8_downsampled_try3_peak_564	451	17.2527	45.1758	42.39	109
chr1	42775511	42775720	Project004-IPSHOCH-Exp5-ChIP-ES-CTCF-IP-Blobel-Rep2-S1_S2_MACS2_rendition_1E-8_downsampled_try3_peak_565	393	16.861	39.3577	36.6415	97
chr1	42836693	42836920	Project004-IPSHOCH-Exp5-ChIP-ES-CTCF-IP-Blobel-Rep2-S1_S2_MACS2_rendition_1E-8_downsampled_try3_peak_566	333	14.934	33.3837	30.74	94
chr1	42879677	42879852	Project004-IPSHOCH-Exp5-ChIP-ES-CTCF-IP-Blobel-Rep2-S1_S2_MACS2_rendition_1E-8_downsampled_try3_peak_567	151	7.83106	15.1991	12.8341	50
chr1	42912963	42913151	Project004-IPSHOCH-Exp5-ChIP-ES-CTCF-IP-Blobel-Rep2-S1_S2_MACS2_rendition_1E-8_downsampled_try3_peak_568	176	7.11864	17.6258	15.2133	77
chr1	42913334	42913545	Project004-IPSHOCH-Exp5-ChIP-ES-CTCF-IP-Blobel-Rep2-S1_S2_MACS2_rendition_1E-8_downsampled_try3_peak_569	249	9.78254	24.9759	22.4445	97
chr1	42971896	42972182	Project004-IPSHOCH-Exp5-ChIP-ES-CTCF-IP-Blobel-Rep2-S1_S2_MACS2_rendition_1E-8_downsampled_try3_peak_570	510	16.25	51.0377	48.1789	131
chr1	43050688	43050942	Project004-IPSHOCH-Exp5-ChIP-ES-CTCF-IP-Blobel-Rep2-S1_S2_MACS2_rendition_1E-8_downsampled_try3_peak_571	179	8.91892	17.9999	15.5739	124
chr1	43108883	43109065	Project004-IPSHOCH-Exp5-ChIP-ES-CTCF-IP-Blobel-Rep2-S1_S2_MACS2_rendition_1E-8_downsampled_try3_peak_572	165	9.18919	16.529	14.131	120
chr1	43122783	43123159	Project004-IPSHOCH-Exp5-ChIP-ES-CTCF-IP-Blobel-Rep2-S1_S2_MACS2_rendition_1E-8_downsampled_try3_peak_573	924	29.1892	92.4393	89.0591	181
chr1	43167388	43167828	Project004-IPSHOCH-Exp5-ChIP-ES-CTCF-IP-Blobel-Rep2-S1_S2_MACS2_rendition_1E-8_downsampled_try3_peak_574	1416	33.9332	141.681	137.585	230
chr1	43169822	43170085	Project004-IPSHOCH-Exp5-ChIP-ES-CTCF-IP-Blobel-Rep2-S1_S2_MACS2_rendition_1E-8_downsampled_try3_peak_575	607	23.0739	60.782	57.8069	114
chr1	43195061	43195515	Project004-IPSHOCH-Exp5-ChIP-ES-CTCF-IP-Blobel-Rep2-S1_S2_MACS2_rendition_1E-8_downsampled_try3_peak_576	1131	29.0625	113.163	109.492	205
chr1	43196367	43196862	Project004-IPSHOCH-Exp5-ChIP-ES-CTCF-IP-Blobel-Rep2-S1_S2_MACS2_rendition_1E-8_downsampled_try3_peak_577	2119	63.8138	211.971	206.898	265
chr1	43321266	43321665	Project004-IPSHOCH-Exp5-ChIP-ES-CTCF-IP-Blobel-Rep2-S1_S2_MACS2_rendition_1E-8_downsampled_try3_peak_578	746	20.6449	74.6055	71.4564	173
chr1	43326516	43326878	Project004-IPSHOCH-Exp5-ChIP-ES-CTCF-IP-Blobel-Rep2-S1_S2_MACS2_rendition_1E-8_downsampled_try3_peak_579	700	18.0509	70.0029	66.9143	212
chr1	43337064	43337301	Project004-IPSHOCH-Exp5-ChIP-ES-CTCF-IP-Blobel-Rep2-S1_S2_MACS2_rendition_1E-8_downsampled_try3_peak_580	140	8.16817	14.0041	11.6555	107
chr1	43356302	43356641	Project004-IPSHOCH-Exp5-ChIP-ES-CTCF-IP-Blobel-Rep2-S1_S2_MACS2_rendition_1E-8_downsampled_try3_peak_581	623	24.5045	62.3783	59.3817	190
chr1	43502348	43502627	Project004-IPSHOCH-Exp5-ChIP-ES-CTCF-IP-Blobel-Rep2-S1_S2_MACS2_rendition_1E-8_downsampled_try3_peak_582	310	13.1449	31.0104	28.3969	148
chr1	43568180	43568385	Project004-IPSHOCH-Exp5-ChIP-ES-CTCF-IP-Blobel-Rep2-S1_S2_MACS2_rendition_1E-8_downsampled_try3_peak_583	179	8.91892	17.9999	15.5739	134
chr1	43692642	43692924	Project004-IPSHOCH-Exp5-ChIP-ES-CTCF-IP-Blobel-Rep2-S1_S2_MACS2_rendition_1E-8_downsampled_try3_peak_584	426	18.3784	42.633	39.8736	133
chr1	43789011	43789203	Project004-IPSHOCH-Exp5-ChIP-ES-CTCF-IP-Blobel-Rep2-S1_S2_MACS2_rendition_1E-8_downsampled_try3_peak_585	175	7.8125	17.5473	15.1358	71
chr1	43795080	43795617	Project004-IPSHOCH-Exp5-ChIP-ES-CTCF-IP-Blobel-Rep2-S1_S2_MACS2_rendition_1E-8_downsampled_try3_peak_586	645	17.0339	64.5035	61.4846	147
chr1	43816982	43817384	Project004-IPSHOCH-Exp5-ChIP-ES-CTCF-IP-Blobel-Rep2-S1_S2_MACS2_rendition_1E-8_downsampled_try3_peak_587	667	25.6008	66.7882	63.7399	147
chr1	43912110	43912302	Project004-IPSHOCH-Exp5-ChIP-ES-CTCF-IP-Blobel-Rep2-S1_S2_MACS2_rendition_1E-8_downsampled_try3_peak_588	165	9.18919	16.529	14.131	99
chr1	43955809	43956225	Project004-IPSHOCH-Exp5-ChIP-ES-CTCF-IP-Blobel-Rep2-S1_S2_MACS2_rendition_1E-8_downsampled_try3_peak_589	834	16.8518	83.4664	80.2039	190
chr1	43959628	43960052	Project004-IPSHOCH-Exp5-ChIP-ES-CTCF-IP-Blobel-Rep2-S1_S2_MACS2_rendition_1E-8_downsampled_try3_peak_590	598	21.0811	59.8822	56.9181	218
chr1	44006709	44006942	Project004-IPSHOCH-Exp5-ChIP-ES-CTCF-IP-Blobel-Rep2-S1_S2_MACS2_rendition_1E-8_downsampled_try3_peak_591	303	14.2943	30.3973	27.7914	143
chr1	44023595	44023996	Project004-IPSHOCH-Exp5-ChIP-ES-CTCF-IP-Blobel-Rep2-S1_S2_MACS2_rendition_1E-8_downsampled_try3_peak_592	401	11.1429	40.1258	37.4008	221
chr1	44098608	44099068	Project004-IPSHOCH-Exp5-ChIP-ES-CTCF-IP-Blobel-Rep2-S1_S2_MACS2_rendition_1E-8_downsampled_try3_peak_593	834	16.8518	83.4664	80.2039	206
chr1	44121481	44121891	Project004-IPSHOCH-Exp5-ChIP-ES-CTCF-IP-Blobel-Rep2-S1_S2_MACS2_rendition_1E-8_downsampled_try3_peak_594	1274	37.2973	127.422	123.541	175
chr1	44176664	44176926	Project004-IPSHOCH-Exp5-ChIP-ES-CTCF-IP-Blobel-Rep2-S1_S2_MACS2_rendition_1E-8_downsampled_try3_peak_595	469	15.3125	46.9413	44.133	145
chr1	44212093	44212470	Project004-IPSHOCH-Exp5-ChIP-ES-CTCF-IP-Blobel-Rep2-S1_S2_MACS2_rendition_1E-8_downsampled_try3_peak_596	426	18.3784	42.633	39.8736	238
chr1	44224911	44225126	Project004-IPSHOCH-Exp5-ChIP-ES-CTCF-IP-Blobel-Rep2-S1_S2_MACS2_rendition_1E-8_downsampled_try3_peak_597	240	11.2317	24.0641	21.5491	74
chr1	44230809	44231102	Project004-IPSHOCH-Exp5-ChIP-ES-CTCF-IP-Blobel-Rep2-S1_S2_MACS2_rendition_1E-8_downsampled_try3_peak_598	622	22.4635	62.2849	59.2958	145
chr1	44285880	44286207	Project004-IPSHOCH-Exp5-ChIP-ES-CTCF-IP-Blobel-Rep2-S1_S2_MACS2_rendition_1E-8_downsampled_try3_peak_599	1017	35.7357	101.767	98.2589	158
chr1	44294229	44294436	Project004-IPSHOCH-Exp5-ChIP-ES-CTCF-IP-Blobel-Rep2-S1_S2_MACS2_rendition_1E-8_downsampled_try3_peak_600	319	14.4523	31.9236	29.298	119
chr1	44494705	44494990	Project004-IPSHOCH-Exp5-ChIP-ES-CTCF-IP-Blobel-Rep2-S1_S2_MACS2_rendition_1E-8_downsampled_try3_peak_601	402	13.75	40.2917	37.5643	138
chr1	44608239	44608621	Project004-IPSHOCH-Exp5-ChIP-ES-CTCF-IP-Blobel-Rep2-S1_S2_MACS2_rendition_1E-8_downsampled_try3_peak_602	890	28.3784	89.0631	85.7257	207
chr1	44798191	44798399	Project004-IPSHOCH-Exp5-ChIP-ES-CTCF-IP-Blobel-Rep2-S1_S2_MACS2_rendition_1E-8_downsampled_try3_peak_603	198	7.07143	19.8608	17.4071	96
chr1	44802551	44802854	Project004-IPSHOCH-Exp5-ChIP-ES-CTCF-IP-Blobel-Rep2-S1_S2_MACS2_rendition_1E-8_downsampled_try3_peak_604	677	23.1081	67.7527	64.6901	146
chr1	45370829	45371053	Project004-IPSHOCH-Exp5-ChIP-ES-CTCF-IP-Blobel-Rep2-S1_S2_MACS2_rendition_1E-8_downsampled_try3_peak_605	462	17.4324	46.2512	43.4487	114
chr1	45488640	45489060	Project004-IPSHOCH-Exp5-ChIP-ES-CTCF-IP-Blobel-Rep2-S1_S2_MACS2_rendition_1E-8_downsampled_try3_peak_606	718	21.974	71.8981	68.7872	285
chr1	45684733	45685030	Project004-IPSHOCH-Exp5-ChIP-ES-CTCF-IP-Blobel-Rep2-S1_S2_MACS2_rendition_1E-8_downsampled_try3_peak_607	416	14.0625	41.603	38.8581	136
chr1	45729682	45729845	Project004-IPSHOCH-Exp5-ChIP-ES-CTCF-IP-Blobel-Rep2-S1_S2_MACS2_rendition_1E-8_downsampled_try3_peak_608	111	5.33898	11.106	8.83078	71
chr1	45822980	45823356	Project004-IPSHOCH-Exp5-ChIP-ES-CTCF-IP-Blobel-Rep2-S1_S2_MACS2_rendition_1E-8_downsampled_try3_peak_609	823	26.7568	82.3854	79.1371	225
chr1	45826973	45827297	Project004-IPSHOCH-Exp5-ChIP-ES-CTCF-IP-Blobel-Rep2-S1_S2_MACS2_rendition_1E-8_downsampled_try3_peak_610	602	23.7353	60.2382	57.271	149
chr1	45873715	45874122	Project004-IPSHOCH-Exp5-ChIP-ES-CTCF-IP-Blobel-Rep2-S1_S2_MACS2_rendition_1E-8_downsampled_try3_peak_611	1249	27.4576	124.909	121.064	202
chr1	45882020	45882357	Project004-IPSHOCH-Exp5-ChIP-ES-CTCF-IP-Blobel-Rep2-S1_S2_MACS2_rendition_1E-8_downsampled_try3_peak_612	741	18.8136	74.1914	71.0496	155
chr1	45919807	45920052	Project004-IPSHOCH-Exp5-ChIP-ES-CTCF-IP-Blobel-Rep2-S1_S2_MACS2_rendition_1E-8_downsampled_try3_peak_613	393	15.6096	39.3717	36.6551	94
chr1	46075305	46075594	Project004-IPSHOCH-Exp5-ChIP-ES-CTCF-IP-Blobel-Rep2-S1_S2_MACS2_rendition_1E-8_downsampled_try3_peak_614	539	21.952	53.9732	51.077	135
chr1	46079213	46079546	Project004-IPSHOCH-Exp5-ChIP-ES-CTCF-IP-Blobel-Rep2-S1_S2_MACS2_rendition_1E-8_downsampled_try3_peak_615	333	15.3153	33.3743	30.7315	170
chr1	46123325	46123510	Project004-IPSHOCH-Exp5-ChIP-ES-CTCF-IP-Blobel-Rep2-S1_S2_MACS2_rendition_1E-8_downsampled_try3_peak_616	178	9.6997	17.8272	15.4061	97
chr1	46123863	46124161	Project004-IPSHOCH-Exp5-ChIP-ES-CTCF-IP-Blobel-Rep2-S1_S2_MACS2_rendition_1E-8_downsampled_try3_peak_617	426	18.3784	42.633	39.8736	154
chr1	46473832	46474153	Project004-IPSHOCH-Exp5-ChIP-ES-CTCF-IP-Blobel-Rep2-S1_S2_MACS2_rendition_1E-8_downsampled_try3_peak_618	939	25.3125	93.9706	90.5741	167
chr1	46482534	46482862	Project004-IPSHOCH-Exp5-ChIP-ES-CTCF-IP-Blobel-Rep2-S1_S2_MACS2_rendition_1E-8_downsampled_try3_peak_619	186	8.125	18.6213	16.1896	66
chr1	46485266	46485539	Project004-IPSHOCH-Exp5-ChIP-ES-CTCF-IP-Blobel-Rep2-S1_S2_MACS2_rendition_1E-8_downsampled_try3_peak_620	260	12.7628	26.0473	23.4987	135
chr1	46637259	46637441	Project004-IPSHOCH-Exp5-ChIP-ES-CTCF-IP-Blobel-Rep2-S1_S2_MACS2_rendition_1E-8_downsampled_try3_peak_621	235	10.5719	23.5184	21.0071	127
chr1	46826196	46826550	Project004-IPSHOCH-Exp5-ChIP-ES-CTCF-IP-Blobel-Rep2-S1_S2_MACS2_rendition_1E-8_downsampled_try3_peak_622	677	23.1081	67.7527	64.6901	153
chr1	46906597	46906975	Project004-IPSHOCH-Exp5-ChIP-ES-CTCF-IP-Blobel-Rep2-S1_S2_MACS2_rendition_1E-8_downsampled_try3_peak_623	637	19.0625	63.7575	60.7478	166
chr1	46971151	46971670	Project004-IPSHOCH-Exp5-ChIP-ES-CTCF-IP-Blobel-Rep2-S1_S2_MACS2_rendition_1E-8_downsampled_try3_peak_624	1027	31.6216	102.709	99.1861	249
chr1	46996215	46996442	Project004-IPSHOCH-Exp5-ChIP-ES-CTCF-IP-Blobel-Rep2-S1_S2_MACS2_rendition_1E-8_downsampled_try3_peak_625	217	9.23463	21.7129	19.2324	106
chr1	47027289	47027761	Project004-IPSHOCH-Exp5-ChIP-ES-CTCF-IP-Blobel-Rep2-S1_S2_MACS2_rendition_1E-8_downsampled_try3_peak_626	1422	46.4565	142.205	138.095	273
chr1	47255853	47256034	Project004-IPSHOCH-Exp5-ChIP-ES-CTCF-IP-Blobel-Rep2-S1_S2_MACS2_rendition_1E-8_downsampled_try3_peak_627	145	7.7027	14.5288	12.1698	85
chr1	47334595	47334928	Project004-IPSHOCH-Exp5-ChIP-ES-CTCF-IP-Blobel-Rep2-S1_S2_MACS2_rendition_1E-8_downsampled_try3_peak_628	472	19.3813	47.2871	44.4769	193
chr1	47866427	47866694	Project004-IPSHOCH-Exp5-ChIP-ES-CTCF-IP-Blobel-Rep2-S1_S2_MACS2_rendition_1E-8_downsampled_try3_peak_629	539	21.952	53.9732	51.077	128
chr1	48765527	48765738	Project004-IPSHOCH-Exp5-ChIP-ES-CTCF-IP-Blobel-Rep2-S1_S2_MACS2_rendition_1E-8_downsampled_try3_peak_630	232	11.7417	23.2312	20.7218	133
chr1	49436348	49436531	Project004-IPSHOCH-Exp5-ChIP-ES-CTCF-IP-Blobel-Rep2-S1_S2_MACS2_rendition_1E-8_downsampled_try3_peak_631	165	9.18919	16.529	14.131	77
chr1	50888653	50888824	Project004-IPSHOCH-Exp5-ChIP-ES-CTCF-IP-Blobel-Rep2-S1_S2_MACS2_rendition_1E-8_downsampled_try3_peak_632	191	10.2102	19.1475	16.7048	58
chr1	50984057	50984302	Project004-IPSHOCH-Exp5-ChIP-ES-CTCF-IP-Blobel-Rep2-S1_S2_MACS2_rendition_1E-8_downsampled_try3_peak_633	157	7.07825	15.703	13.3198	128
chr1	51019114	51019491	Project004-IPSHOCH-Exp5-ChIP-ES-CTCF-IP-Blobel-Rep2-S1_S2_MACS2_rendition_1E-8_downsampled_try3_peak_634	645	22.2973	64.5809	61.5577	214
chr1	51390768	51391212	Project004-IPSHOCH-Exp5-ChIP-ES-CTCF-IP-Blobel-Rep2-S1_S2_MACS2_rendition_1E-8_downsampled_try3_peak_635	807	26.3514	80.732	77.5056	222
chr1	51394996	51395300	Project004-IPSHOCH-Exp5-ChIP-ES-CTCF-IP-Blobel-Rep2-S1_S2_MACS2_rendition_1E-8_downsampled_try3_peak_636	320	13.3784	32.0676	29.4379	149
chr1	51404462	51404771	Project004-IPSHOCH-Exp5-ChIP-ES-CTCF-IP-Blobel-Rep2-S1_S2_MACS2_rendition_1E-8_downsampled_try3_peak_637	437	17.765	43.7935	41.0234	152
chr1	51515874	51516200	Project004-IPSHOCH-Exp5-ChIP-ES-CTCF-IP-Blobel-Rep2-S1_S2_MACS2_rendition_1E-8_downsampled_try3_peak_638	1532	48.3238	153.242	148.968	142
chr1	51522192	51522482	Project004-IPSHOCH-Exp5-ChIP-ES-CTCF-IP-Blobel-Rep2-S1_S2_MACS2_rendition_1E-8_downsampled_try3_peak_639	446	18.2621	44.637	41.8569	155
chr1	51523248	51523624	Project004-IPSHOCH-Exp5-ChIP-ES-CTCF-IP-Blobel-Rep2-S1_S2_MACS2_rendition_1E-8_downsampled_try3_peak_640	447	17.027	44.7837	42	218
chr1	51653852	51654389	Project004-IPSHOCH-Exp5-ChIP-ES-CTCF-IP-Blobel-Rep2-S1_S2_MACS2_rendition_1E-8_downsampled_try3_peak_641	1330	32.8125	133.026	129.055	195
chr1	51657281	51657610	Project004-IPSHOCH-Exp5-ChIP-ES-CTCF-IP-Blobel-Rep2-S1_S2_MACS2_rendition_1E-8_downsampled_try3_peak_642	823	26.7568	82.3854	79.1371	167
chr1	51672391	51672893	Project004-IPSHOCH-Exp5-ChIP-ES-CTCF-IP-Blobel-Rep2-S1_S2_MACS2_rendition_1E-8_downsampled_try3_peak_643	1131	34.054	113.178	109.501	172
chr1	51695734	51696086	Project004-IPSHOCH-Exp5-ChIP-ES-CTCF-IP-Blobel-Rep2-S1_S2_MACS2_rendition_1E-8_downsampled_try3_peak_644	573	22.973	57.3068	54.371	151
chr1	51701281	51701677	Project004-IPSHOCH-Exp5-ChIP-ES-CTCF-IP-Blobel-Rep2-S1_S2_MACS2_rendition_1E-8_downsampled_try3_peak_645	892	24.375	89.2882	85.9475	204
chr1	51725824	51726065	Project004-IPSHOCH-Exp5-ChIP-ES-CTCF-IP-Blobel-Rep2-S1_S2_MACS2_rendition_1E-8_downsampled_try3_peak_646	307	12.973	30.7148	28.1028	122
chr1	51784037	51784271	Project004-IPSHOCH-Exp5-ChIP-ES-CTCF-IP-Blobel-Rep2-S1_S2_MACS2_rendition_1E-8_downsampled_try3_peak_647	234	11.5618	23.4793	20.9686	131
chr1	51972790	51972997	Project004-IPSHOCH-Exp5-ChIP-ES-CTCF-IP-Blobel-Rep2-S1_S2_MACS2_rendition_1E-8_downsampled_try3_peak_648	340	10.7112	34.075	31.4221	127
chr1	52001674	52002145	Project004-IPSHOCH-Exp5-ChIP-ES-CTCF-IP-Blobel-Rep2-S1_S2_MACS2_rendition_1E-8_downsampled_try3_peak_649	775	25.0594	77.5161	74.3325	231
chr1	52055413	52055781	Project004-IPSHOCH-Exp5-ChIP-ES-CTCF-IP-Blobel-Rep2-S1_S2_MACS2_rendition_1E-8_downsampled_try3_peak_650	707	26.9279	70.7869	67.6943	159
chr1	52060964	52061547	Project004-IPSHOCH-Exp5-ChIP-ES-CTCF-IP-Blobel-Rep2-S1_S2_MACS2_rendition_1E-8_downsampled_try3_peak_651	1026	33.8924	102.615	99.098	161
chr1	52143156	52143391	Project004-IPSHOCH-Exp5-ChIP-ES-CTCF-IP-Blobel-Rep2-S1_S2_MACS2_rendition_1E-8_downsampled_try3_peak_652	432	17.894	43.2704	40.5078	118
chr1	52155742	52156109	Project004-IPSHOCH-Exp5-ChIP-ES-CTCF-IP-Blobel-Rep2-S1_S2_MACS2_rendition_1E-8_downsampled_try3_peak_653	823	26.7568	82.3854	79.1371	152
chr1	52157360	52157719	Project004-IPSHOCH-Exp5-ChIP-ES-CTCF-IP-Blobel-Rep2-S1_S2_MACS2_rendition_1E-8_downsampled_try3_peak_654	770	21.875	77.0506	73.8727	192
chr1	52170605	52171063	Project004-IPSHOCH-Exp5-ChIP-ES-CTCF-IP-Blobel-Rep2-S1_S2_MACS2_rendition_1E-8_downsampled_try3_peak_655	1938	40.2233	193.897	189.046	188
chr1	52176034	52176256	Project004-IPSHOCH-Exp5-ChIP-ES-CTCF-IP-Blobel-Rep2-S1_S2_MACS2_rendition_1E-8_downsampled_try3_peak_656	258	12.3126	25.8749	23.3342	103
chr1	52188797	52189105	Project004-IPSHOCH-Exp5-ChIP-ES-CTCF-IP-Blobel-Rep2-S1_S2_MACS2_rendition_1E-8_downsampled_try3_peak_657	437	17.2796	43.7133	40.9445	134
chr1	52203393	52203787	Project004-IPSHOCH-Exp5-ChIP-ES-CTCF-IP-Blobel-Rep2-S1_S2_MACS2_rendition_1E-8_downsampled_try3_peak_658	566	17.5	56.6146	53.6917	208
chr1	52226850	52227277	Project004-IPSHOCH-Exp5-ChIP-ES-CTCF-IP-Blobel-Rep2-S1_S2_MACS2_rendition_1E-8_downsampled_try3_peak_659	1045	33.2633	104.572	101.023	221
chr1	52273636	52274018	Project004-IPSHOCH-Exp5-ChIP-ES-CTCF-IP-Blobel-Rep2-S1_S2_MACS2_rendition_1E-8_downsampled_try3_peak_660	604	16.2712	60.4462	57.4774	184
chr1	52324448	52324863	Project004-IPSHOCH-Exp5-ChIP-ES-CTCF-IP-Blobel-Rep2-S1_S2_MACS2_rendition_1E-8_downsampled_try3_peak_661	681	20	68.1289	65.0626	177
chr1	52358061	52358444	Project004-IPSHOCH-Exp5-ChIP-ES-CTCF-IP-Blobel-Rep2-S1_S2_MACS2_rendition_1E-8_downsampled_try3_peak_662	869	30.4805	86.9319	83.6302	222
chr1	52359488	52359860	Project004-IPSHOCH-Exp5-ChIP-ES-CTCF-IP-Blobel-Rep2-S1_S2_MACS2_rendition_1E-8_downsampled_try3_peak_663	890	28.3784	89.0631	85.7257	142
chr1	52363827	52364161	Project004-IPSHOCH-Exp5-ChIP-ES-CTCF-IP-Blobel-Rep2-S1_S2_MACS2_rendition_1E-8_downsampled_try3_peak_664	925	32.0919	92.5798	89.194	160
chr1	52449853	52450039	Project004-IPSHOCH-Exp5-ChIP-ES-CTCF-IP-Blobel-Rep2-S1_S2_MACS2_rendition_1E-8_downsampled_try3_peak_665	178	9.6997	17.8272	15.4061	98
chr1	52543124	52543364	Project004-IPSHOCH-Exp5-ChIP-ES-CTCF-IP-Blobel-Rep2-S1_S2_MACS2_rendition_1E-8_downsampled_try3_peak_666	339	13.7043	33.9698	31.3171	123
chr1	52546683	52546978	Project004-IPSHOCH-Exp5-ChIP-ES-CTCF-IP-Blobel-Rep2-S1_S2_MACS2_rendition_1E-8_downsampled_try3_peak_667	667	25.0506	66.7149	63.6669	155
chr1	52638830	52639192	Project004-IPSHOCH-Exp5-ChIP-ES-CTCF-IP-Blobel-Rep2-S1_S2_MACS2_rendition_1E-8_downsampled_try3_peak_668	151	7.5188	15.1251	12.761	61
chr1	52687295	52687713	Project004-IPSHOCH-Exp5-ChIP-ES-CTCF-IP-Blobel-Rep2-S1_S2_MACS2_rendition_1E-8_downsampled_try3_peak_669	1990	50.1222	199.056	194.14	178
chr1	52688446	52688829	Project004-IPSHOCH-Exp5-ChIP-ES-CTCF-IP-Blobel-Rep2-S1_S2_MACS2_rendition_1E-8_downsampled_try3_peak_670	390	15.4054	39.0183	36.3047	197
chr1	52705050	52705306	Project004-IPSHOCH-Exp5-ChIP-ES-CTCF-IP-Blobel-Rep2-S1_S2_MACS2_rendition_1E-8_downsampled_try3_peak_671	355	10.2857	35.5676	32.8967	132
chr1	52748335	52748621	Project004-IPSHOCH-Exp5-ChIP-ES-CTCF-IP-Blobel-Rep2-S1_S2_MACS2_rendition_1E-8_downsampled_try3_peak_672	165	9.18919	16.529	14.131	137
chr1	52775981	52776278	Project004-IPSHOCH-Exp5-ChIP-ES-CTCF-IP-Blobel-Rep2-S1_S2_MACS2_rendition_1E-8_downsampled_try3_peak_673	318	14.8048	31.8784	29.254	148
chr1	52805140	52805511	Project004-IPSHOCH-Exp5-ChIP-ES-CTCF-IP-Blobel-Rep2-S1_S2_MACS2_rendition_1E-8_downsampled_try3_peak_674	1282	37.7916	128.297	124.403	166
chr1	52910931	52911214	Project004-IPSHOCH-Exp5-ChIP-ES-CTCF-IP-Blobel-Rep2-S1_S2_MACS2_rendition_1E-8_downsampled_try3_peak_675	301	11.25	30.1722	27.5727	154
chr1	52992549	52992748	Project004-IPSHOCH-Exp5-ChIP-ES-CTCF-IP-Blobel-Rep2-S1_S2_MACS2_rendition_1E-8_downsampled_try3_peak_676	178	9.6997	17.8272	15.4061	54
chr1	53011980	53012378	Project004-IPSHOCH-Exp5-ChIP-ES-CTCF-IP-Blobel-Rep2-S1_S2_MACS2_rendition_1E-8_downsampled_try3_peak_677	1009	31.2162	100.983	97.4847	204
chr1	53021440	53021859	Project004-IPSHOCH-Exp5-ChIP-ES-CTCF-IP-Blobel-Rep2-S1_S2_MACS2_rendition_1E-8_downsampled_try3_peak_678	752	17.1429	75.2853	72.1328	207
chr1	53089461	53089765	Project004-IPSHOCH-Exp5-ChIP-ES-CTCF-IP-Blobel-Rep2-S1_S2_MACS2_rendition_1E-8_downsampled_try3_peak_679	454	16.1117	45.4281	42.6397	151
chr1	53109946	53110394	Project004-IPSHOCH-Exp5-ChIP-ES-CTCF-IP-Blobel-Rep2-S1_S2_MACS2_rendition_1E-8_downsampled_try3_peak_680	1167	38.5394	116.778	113.055	131
chr1	53150091	53150507	Project004-IPSHOCH-Exp5-ChIP-ES-CTCF-IP-Blobel-Rep2-S1_S2_MACS2_rendition_1E-8_downsampled_try3_peak_681	376	13.125	37.6986	35.0025	161
chr1	53329594	53329869	Project004-IPSHOCH-Exp5-ChIP-ES-CTCF-IP-Blobel-Rep2-S1_S2_MACS2_rendition_1E-8_downsampled_try3_peak_682	323	13.5557	32.3728	29.7413	132
chr1	53409555	53409828	Project004-IPSHOCH-Exp5-ChIP-ES-CTCF-IP-Blobel-Rep2-S1_S2_MACS2_rendition_1E-8_downsampled_try3_peak_683	371	16.3688	37.1388	34.4501	154
chr1	53679229	53679625	Project004-IPSHOCH-Exp5-ChIP-ES-CTCF-IP-Blobel-Rep2-S1_S2_MACS2_rendition_1E-8_downsampled_try3_peak_684	510	16.25	51.0377	48.1789	229
chr1	53761033	53761356	Project004-IPSHOCH-Exp5-ChIP-ES-CTCF-IP-Blobel-Rep2-S1_S2_MACS2_rendition_1E-8_downsampled_try3_peak_685	807	26.3514	80.732	77.5056	162
chr1	53763142	53763490	Project004-IPSHOCH-Exp5-ChIP-ES-CTCF-IP-Blobel-Rep2-S1_S2_MACS2_rendition_1E-8_downsampled_try3_peak_686	643	18.9537	64.3812	61.3646	193
chr1	53769275	53769575	Project004-IPSHOCH-Exp5-ChIP-ES-CTCF-IP-Blobel-Rep2-S1_S2_MACS2_rendition_1E-8_downsampled_try3_peak_687	286	13.6352	28.682	26.1029	142
chr1	53772307	53772684	Project004-IPSHOCH-Exp5-ChIP-ES-CTCF-IP-Blobel-Rep2-S1_S2_MACS2_rendition_1E-8_downsampled_try3_peak_688	1485	43.631	148.533	144.329	172
chr1	53947281	53947577	Project004-IPSHOCH-Exp5-ChIP-ES-CTCF-IP-Blobel-Rep2-S1_S2_MACS2_rendition_1E-8_downsampled_try3_peak_689	686	17.7966	68.6187	65.5494	154
chr1	53965952	53966352	Project004-IPSHOCH-Exp5-ChIP-ES-CTCF-IP-Blobel-Rep2-S1_S2_MACS2_rendition_1E-8_downsampled_try3_peak_690	816	30.1201	81.6288	78.3889	172
chr1	53984459	53984852	Project004-IPSHOCH-Exp5-ChIP-ES-CTCF-IP-Blobel-Rep2-S1_S2_MACS2_rendition_1E-8_downsampled_try3_peak_691	831	23.125	83.1228	79.8667	198
chr1	54095997	54096318	Project004-IPSHOCH-Exp5-ChIP-ES-CTCF-IP-Blobel-Rep2-S1_S2_MACS2_rendition_1E-8_downsampled_try3_peak_692	569	12.963	56.9198	53.992	128
chr1	54332333	54332759	Project004-IPSHOCH-Exp5-ChIP-ES-CTCF-IP-Blobel-Rep2-S1_S2_MACS2_rendition_1E-8_downsampled_try3_peak_693	469	15.3125	46.9413	44.133	250
chr1	54389857	54390178	Project004-IPSHOCH-Exp5-ChIP-ES-CTCF-IP-Blobel-Rep2-S1_S2_MACS2_rendition_1E-8_downsampled_try3_peak_694	534	21.1967	53.4851	50.6014	195
chr1	54419489	54419790	Project004-IPSHOCH-Exp5-ChIP-ES-CTCF-IP-Blobel-Rep2-S1_S2_MACS2_rendition_1E-8_downsampled_try3_peak_695	318	14.8048	31.8784	29.254	143
chr1	54430771	54430972	Project004-IPSHOCH-Exp5-ChIP-ES-CTCF-IP-Blobel-Rep2-S1_S2_MACS2_rendition_1E-8_downsampled_try3_peak_696	115	7.14715	11.5839	9.28731	105
chr1	54438061	54438856	Project004-IPSHOCH-Exp5-ChIP-ES-CTCF-IP-Blobel-Rep2-S1_S2_MACS2_rendition_1E-8_downsampled_try3_peak_697	1383	39.7297	138.304	134.251	262
chr1	54537357	54537589	Project004-IPSHOCH-Exp5-ChIP-ES-CTCF-IP-Blobel-Rep2-S1_S2_MACS2_rendition_1E-8_downsampled_try3_peak_698	219	9.0625	21.9387	19.4486	135
chr1	54570726	54571057	Project004-IPSHOCH-Exp5-ChIP-ES-CTCF-IP-Blobel-Rep2-S1_S2_MACS2_rendition_1E-8_downsampled_try3_peak_699	366	10.5	36.6942	34.0069	168
chr1	54597925	54598189	Project004-IPSHOCH-Exp5-ChIP-ES-CTCF-IP-Blobel-Rep2-S1_S2_MACS2_rendition_1E-8_downsampled_try3_peak_700	245	12.1938	24.5327	22.0107	185
chr1	54722721	54723219	Project004-IPSHOCH-Exp5-ChIP-ES-CTCF-IP-Blobel-Rep2-S1_S2_MACS2_rendition_1E-8_downsampled_try3_peak_701	1244	41.17	124.459	120.626	287
chr1	54733809	54734002	Project004-IPSHOCH-Exp5-ChIP-ES-CTCF-IP-Blobel-Rep2-S1_S2_MACS2_rendition_1E-8_downsampled_try3_peak_702	218	11.2312	21.8505	19.3628	98
chr1	54763383	54764006	Project004-IPSHOCH-Exp5-ChIP-ES-CTCF-IP-Blobel-Rep2-S1_S2_MACS2_rendition_1E-8_downsampled_try3_peak_703	790	25.9459	79.0852	75.8808	276
chr1	54793796	54794050	Project004-IPSHOCH-Exp5-ChIP-ES-CTCF-IP-Blobel-Rep2-S1_S2_MACS2_rendition_1E-8_downsampled_try3_peak_704	242	9.6875	24.2245	21.7039	115
chr1	54812685	54812887	Project004-IPSHOCH-Exp5-ChIP-ES-CTCF-IP-Blobel-Rep2-S1_S2_MACS2_rendition_1E-8_downsampled_try3_peak_705	246	12.2523	24.6304	22.1021	71
chr1	54889688	54889919	Project004-IPSHOCH-Exp5-ChIP-ES-CTCF-IP-Blobel-Rep2-S1_S2_MACS2_rendition_1E-8_downsampled_try3_peak_706	410	17.8679	41.0581	38.3178	85
chr1	54926815	54927040	Project004-IPSHOCH-Exp5-ChIP-ES-CTCF-IP-Blobel-Rep2-S1_S2_MACS2_rendition_1E-8_downsampled_try3_peak_707	175	7.8125	17.5473	15.1358	87
chr1	54991605	54991893	Project004-IPSHOCH-Exp5-ChIP-ES-CTCF-IP-Blobel-Rep2-S1_S2_MACS2_rendition_1E-8_downsampled_try3_peak_708	293	11.8153	29.3257	26.7347	137
chr1	55015422	55015737	Project004-IPSHOCH-Exp5-ChIP-ES-CTCF-IP-Blobel-Rep2-S1_S2_MACS2_rendition_1E-8_downsampled_try3_peak_709	616	23.6054	61.687	58.7018	136
chr1	55036112	55036431	Project004-IPSHOCH-Exp5-ChIP-ES-CTCF-IP-Blobel-Rep2-S1_S2_MACS2_rendition_1E-8_downsampled_try3_peak_710	486	19.7514	48.6794	45.8506	147
chr1	55040231	55040520	Project004-IPSHOCH-Exp5-ChIP-ES-CTCF-IP-Blobel-Rep2-S1_S2_MACS2_rendition_1E-8_downsampled_try3_peak_711	586	20.3607	58.6141	55.6656	135
chr1	55065194	55065516	Project004-IPSHOCH-Exp5-ChIP-ES-CTCF-IP-Blobel-Rep2-S1_S2_MACS2_rendition_1E-8_downsampled_try3_peak_712	230	9.375	23.0745	20.5725	113
chr1	55069424	55069774	Project004-IPSHOCH-Exp5-ChIP-ES-CTCF-IP-Blobel-Rep2-S1_S2_MACS2_rendition_1E-8_downsampled_try3_peak_713	348	13.0471	34.8262	32.1679	92
chr1	55082550	55082819	Project004-IPSHOCH-Exp5-ChIP-ES-CTCF-IP-Blobel-Rep2-S1_S2_MACS2_rendition_1E-8_downsampled_try3_peak_714	389	13.4375	38.9902	36.28	116
chr1	55099126	55099456	Project004-IPSHOCH-Exp5-ChIP-ES-CTCF-IP-Blobel-Rep2-S1_S2_MACS2_rendition_1E-8_downsampled_try3_peak_715	736	25.4874	73.6894	70.5571	146
chr1	55138941	55139264	Project004-IPSHOCH-Exp5-ChIP-ES-CTCF-IP-Blobel-Rep2-S1_S2_MACS2_rendition_1E-8_downsampled_try3_peak_716	375	14.5388	37.5037	34.8133	183
chr1	55192682	55193030	Project004-IPSHOCH-Exp5-ChIP-ES-CTCF-IP-Blobel-Rep2-S1_S2_MACS2_rendition_1E-8_downsampled_try3_peak_717	260	11.7322	26.0906	23.542	138
chr1	55218791	55219230	Project004-IPSHOCH-Exp5-ChIP-ES-CTCF-IP-Blobel-Rep2-S1_S2_MACS2_rendition_1E-8_downsampled_try3_peak_718	1434	35.9491	143.469	139.346	174
chr1	55237072	55237342	Project004-IPSHOCH-Exp5-ChIP-ES-CTCF-IP-Blobel-Rep2-S1_S2_MACS2_rendition_1E-8_downsampled_try3_peak_719	280	12.1622	28.0497	25.4743	118
chr1	55242655	55242903	Project004-IPSHOCH-Exp5-ChIP-ES-CTCF-IP-Blobel-Rep2-S1_S2_MACS2_rendition_1E-8_downsampled_try3_peak_720	253	10	25.3882	22.8526	117
chr1	55249592	55250110	Project004-IPSHOCH-Exp5-ChIP-ES-CTCF-IP-Blobel-Rep2-S1_S2_MACS2_rendition_1E-8_downsampled_try3_peak_721	1637	49.086	163.746	159.314	247
chr1	55296058	55296530	Project004-IPSHOCH-Exp5-ChIP-ES-CTCF-IP-Blobel-Rep2-S1_S2_MACS2_rendition_1E-8_downsampled_try3_peak_722	1061	34.1448	106.102	102.534	280
chr1	55322376	55322539	Project004-IPSHOCH-Exp5-ChIP-ES-CTCF-IP-Blobel-Rep2-S1_S2_MACS2_rendition_1E-8_downsampled_try3_peak_723	179	8.91892	17.9999	15.5739	83
chr1	55350594	55350841	Project004-IPSHOCH-Exp5-ChIP-ES-CTCF-IP-Blobel-Rep2-S1_S2_MACS2_rendition_1E-8_downsampled_try3_peak_724	254	11.3514	25.4413	22.9023	122
chr1	55352016	55352262	Project004-IPSHOCH-Exp5-ChIP-ES-CTCF-IP-Blobel-Rep2-S1_S2_MACS2_rendition_1E-8_downsampled_try3_peak_725	246	12.2523	24.6304	22.1021	107
chr1	55357958	55358220	Project004-IPSHOCH-Exp5-ChIP-ES-CTCF-IP-Blobel-Rep2-S1_S2_MACS2_rendition_1E-8_downsampled_try3_peak_726	364	12.8125	36.4172	33.7309	153
chr1	55419979	55420744	Project004-IPSHOCH-Exp5-ChIP-ES-CTCF-IP-Blobel-Rep2-S1_S2_MACS2_rendition_1E-8_downsampled_try3_peak_727	1493	42.1622	149.345	145.129	294
chr1	55439968	55440446	Project004-IPSHOCH-Exp5-ChIP-ES-CTCF-IP-Blobel-Rep2-S1_S2_MACS2_rendition_1E-8_downsampled_try3_peak_728	2098	63.3033	209.855	204.809	222
chr1	55461228	55461640	Project004-IPSHOCH-Exp5-ChIP-ES-CTCF-IP-Blobel-Rep2-S1_S2_MACS2_rendition_1E-8_downsampled_try3_peak_729	727	25.9642	72.7009	69.579	162
chr1	55486614	55486886	Project004-IPSHOCH-Exp5-ChIP-ES-CTCF-IP-Blobel-Rep2-S1_S2_MACS2_rendition_1E-8_downsampled_try3_peak_730	354	15.3666	35.4501	32.7797	184
chr1	55504509	55504825	Project004-IPSHOCH-Exp5-ChIP-ES-CTCF-IP-Blobel-Rep2-S1_S2_MACS2_rendition_1E-8_downsampled_try3_peak_731	426	18.3784	42.633	39.8736	201
chr1	55530755	55530985	Project004-IPSHOCH-Exp5-ChIP-ES-CTCF-IP-Blobel-Rep2-S1_S2_MACS2_rendition_1E-8_downsampled_try3_peak_732	365	14.788	36.5362	33.8494	102
chr1	55793248	55793579	Project004-IPSHOCH-Exp5-ChIP-ES-CTCF-IP-Blobel-Rep2-S1_S2_MACS2_rendition_1E-8_downsampled_try3_peak_733	851	26.1832	85.1416	81.8623	183
chr1	55812532	55812946	Project004-IPSHOCH-Exp5-ChIP-ES-CTCF-IP-Blobel-Rep2-S1_S2_MACS2_rendition_1E-8_downsampled_try3_peak_734	925	33.1832	92.5134	89.1277	268
chr1	55895022	55895426	Project004-IPSHOCH-Exp5-ChIP-ES-CTCF-IP-Blobel-Rep2-S1_S2_MACS2_rendition_1E-8_downsampled_try3_peak_735	1245	41.8619	124.586	120.748	200
chr1	55931036	55931957	Project004-IPSHOCH-Exp5-ChIP-ES-CTCF-IP-Blobel-Rep2-S1_S2_MACS2_rendition_1E-8_downsampled_try3_peak_736	914	21.8644	91.4503	88.0833	204
chr1	55943292	55943608	Project004-IPSHOCH-Exp5-ChIP-ES-CTCF-IP-Blobel-Rep2-S1_S2_MACS2_rendition_1E-8_downsampled_try3_peak_737	455	18.7879	45.5274	42.738	155
chr1	55947617	55947888	Project004-IPSHOCH-Exp5-ChIP-ES-CTCF-IP-Blobel-Rep2-S1_S2_MACS2_rendition_1E-8_downsampled_try3_peak_738	437	16.4452	43.7664	40.9971	148
chr1	56017135	56017546	Project004-IPSHOCH-Exp5-ChIP-ES-CTCF-IP-Blobel-Rep2-S1_S2_MACS2_rendition_1E-8_downsampled_try3_peak_739	980	34.7147	98.0466	94.5881	206
chr1	56252149	56252373	Project004-IPSHOCH-Exp5-ChIP-ES-CTCF-IP-Blobel-Rep2-S1_S2_MACS2_rendition_1E-8_downsampled_try3_peak_740	230	9.375	23.0745	20.5725	129
chr1	56810177	56810418	Project004-IPSHOCH-Exp5-ChIP-ES-CTCF-IP-Blobel-Rep2-S1_S2_MACS2_rendition_1E-8_downsampled_try3_peak_741	238	8.64407	23.8159	21.3024	136
chr1	57033938	57034330	Project004-IPSHOCH-Exp5-ChIP-ES-CTCF-IP-Blobel-Rep2-S1_S2_MACS2_rendition_1E-8_downsampled_try3_peak_742	766	17.3571	76.6298	73.4583	213
chr1	57048554	57048788	Project004-IPSHOCH-Exp5-ChIP-ES-CTCF-IP-Blobel-Rep2-S1_S2_MACS2_rendition_1E-8_downsampled_try3_peak_743	232	11.7417	23.2312	20.7218	138
chr1	57057253	57057535	Project004-IPSHOCH-Exp5-ChIP-ES-CTCF-IP-Blobel-Rep2-S1_S2_MACS2_rendition_1E-8_downsampled_try3_peak_744	210	9.78882	21.053	18.5801	172
chr1	57152486	57152650	Project004-IPSHOCH-Exp5-ChIP-ES-CTCF-IP-Blobel-Rep2-S1_S2_MACS2_rendition_1E-8_downsampled_try3_peak_745	152	8.67868	15.2542	12.8807	67
chr1	57262499	57262840	Project004-IPSHOCH-Exp5-ChIP-ES-CTCF-IP-Blobel-Rep2-S1_S2_MACS2_rendition_1E-8_downsampled_try3_peak_746	1189	36.7192	118.909	115.15	178
chr1	57326613	57326960	Project004-IPSHOCH-Exp5-ChIP-ES-CTCF-IP-Blobel-Rep2-S1_S2_MACS2_rendition_1E-8_downsampled_try3_peak_747	1111	37.0941	111.18	107.538	161
chr1	57395877	57396375	Project004-IPSHOCH-Exp5-ChIP-ES-CTCF-IP-Blobel-Rep2-S1_S2_MACS2_rendition_1E-8_downsampled_try3_peak_748	695	20.3125	69.5996	66.5135	335
chr1	57450794	57451249	Project004-IPSHOCH-Exp5-ChIP-ES-CTCF-IP-Blobel-Rep2-S1_S2_MACS2_rendition_1E-8_downsampled_try3_peak_749	1188	40.3303	118.805	115.048	274
chr1	57480565	57480849	Project004-IPSHOCH-Exp5-ChIP-ES-CTCF-IP-Blobel-Rep2-S1_S2_MACS2_rendition_1E-8_downsampled_try3_peak_750	293	12.5676	29.3754	26.781	149
chr1	57485757	57486120	Project004-IPSHOCH-Exp5-ChIP-ES-CTCF-IP-Blobel-Rep2-S1_S2_MACS2_rendition_1E-8_downsampled_try3_peak_751	861	18.8571	86.1865	82.8912	183
chr1	57745703	57745866	Project004-IPSHOCH-Exp5-ChIP-ES-CTCF-IP-Blobel-Rep2-S1_S2_MACS2_rendition_1E-8_downsampled_try3_peak_752	169	9.1531	16.9255	14.5197	63
chr1	58006124	58006377	Project004-IPSHOCH-Exp5-ChIP-ES-CTCF-IP-Blobel-Rep2-S1_S2_MACS2_rendition_1E-8_downsampled_try3_peak_753	297	11.0054	29.7047	27.1088	131
chr1	58026713	58027241	Project004-IPSHOCH-Exp5-ChIP-ES-CTCF-IP-Blobel-Rep2-S1_S2_MACS2_rendition_1E-8_downsampled_try3_peak_754	1230	30.9375	123.016	119.199	286
chr1	58068778	58068955	Project004-IPSHOCH-Exp5-ChIP-ES-CTCF-IP-Blobel-Rep2-S1_S2_MACS2_rendition_1E-8_downsampled_try3_peak_755	172	9.3689	17.2809	14.8736	92
chr1	58088032	58088406	Project004-IPSHOCH-Exp5-ChIP-ES-CTCF-IP-Blobel-Rep2-S1_S2_MACS2_rendition_1E-8_downsampled_try3_peak_756	1480	37.7678	148.047	143.855	192
chr1	58136645	58136865	Project004-IPSHOCH-Exp5-ChIP-ES-CTCF-IP-Blobel-Rep2-S1_S2_MACS2_rendition_1E-8_downsampled_try3_peak_757	365	14.788	36.5362	33.8494	91
chr1	58146393	58146599	Project004-IPSHOCH-Exp5-ChIP-ES-CTCF-IP-Blobel-Rep2-S1_S2_MACS2_rendition_1E-8_downsampled_try3_peak_758	218	11.2312	21.8505	19.3628	95
chr1	58169627	58170055	Project004-IPSHOCH-Exp5-ChIP-ES-CTCF-IP-Blobel-Rep2-S1_S2_MACS2_rendition_1E-8_downsampled_try3_peak_759	943	22.3729	94.3999	90.9892	202
chr1	58195860	58196203	Project004-IPSHOCH-Exp5-ChIP-ES-CTCF-IP-Blobel-Rep2-S1_S2_MACS2_rendition_1E-8_downsampled_try3_peak_760	643	24.655	64.3213	61.305	188
chr1	58197456	58197738	Project004-IPSHOCH-Exp5-ChIP-ES-CTCF-IP-Blobel-Rep2-S1_S2_MACS2_rendition_1E-8_downsampled_try3_peak_761	390	15.4054	39.0183	36.3047	145
chr1	58213593	58213931	Project004-IPSHOCH-Exp5-ChIP-ES-CTCF-IP-Blobel-Rep2-S1_S2_MACS2_rendition_1E-8_downsampled_try3_peak_762	632	21.5354	63.2375	60.2326	178
chr1	58292359	58292593	Project004-IPSHOCH-Exp5-ChIP-ES-CTCF-IP-Blobel-Rep2-S1_S2_MACS2_rendition_1E-8_downsampled_try3_peak_763	378	15.5517	37.8461	35.1474	121
chr1	58328061	58328340	Project004-IPSHOCH-Exp5-ChIP-ES-CTCF-IP-Blobel-Rep2-S1_S2_MACS2_rendition_1E-8_downsampled_try3_peak_764	652	19.375	65.2077	62.179	140
chr1	58353136	58353551	Project004-IPSHOCH-Exp5-ChIP-ES-CTCF-IP-Blobel-Rep2-S1_S2_MACS2_rendition_1E-8_downsampled_try3_peak_765	914	17.963	91.4592	88.092	228
chr1	58452279	58452550	Project004-IPSHOCH-Exp5-ChIP-ES-CTCF-IP-Blobel-Rep2-S1_S2_MACS2_rendition_1E-8_downsampled_try3_peak_766	230	9.375	23.0745	20.5725	140
chr1	58453122	58453391	Project004-IPSHOCH-Exp5-ChIP-ES-CTCF-IP-Blobel-Rep2-S1_S2_MACS2_rendition_1E-8_downsampled_try3_peak_767	369	14.6243	36.9515	34.2631	142
chr1	58472396	58472692	Project004-IPSHOCH-Exp5-ChIP-ES-CTCF-IP-Blobel-Rep2-S1_S2_MACS2_rendition_1E-8_downsampled_try3_peak_768	497	19.0076	49.752	46.9088	150
chr1	58505288	58505691	Project004-IPSHOCH-Exp5-ChIP-ES-CTCF-IP-Blobel-Rep2-S1_S2_MACS2_rendition_1E-8_downsampled_try3_peak_769	830	27.1114	83.0092	79.7565	179
chr1	58555677	58555949	Project004-IPSHOCH-Exp5-ChIP-ES-CTCF-IP-Blobel-Rep2-S1_S2_MACS2_rendition_1E-8_downsampled_try3_peak_770	442	14.6875	44.2539	41.4744	134
chr1	58557847	58558047	Project004-IPSHOCH-Exp5-ChIP-ES-CTCF-IP-Blobel-Rep2-S1_S2_MACS2_rendition_1E-8_downsampled_try3_peak_771	109	6.32404	10.9892	8.71534	56
chr1	58617328	58617684	Project004-IPSHOCH-Exp5-ChIP-ES-CTCF-IP-Blobel-Rep2-S1_S2_MACS2_rendition_1E-8_downsampled_try3_peak_772	189	9.77872	18.9285	16.4945	151
chr1	58619307	58619693	Project004-IPSHOCH-Exp5-ChIP-ES-CTCF-IP-Blobel-Rep2-S1_S2_MACS2_rendition_1E-8_downsampled_try3_peak_773	941	29.5946	94.1364	90.7333	203
chr1	58636051	58636391	Project004-IPSHOCH-Exp5-ChIP-ES-CTCF-IP-Blobel-Rep2-S1_S2_MACS2_rendition_1E-8_downsampled_try3_peak_774	775	25.0594	77.5161	74.3325	183
chr1	58641172	58641414	Project004-IPSHOCH-Exp5-ChIP-ES-CTCF-IP-Blobel-Rep2-S1_S2_MACS2_rendition_1E-8_downsampled_try3_peak_775	152	8.67868	15.2542	12.8807	124
chr1	58657928	58658105	Project004-IPSHOCH-Exp5-ChIP-ES-CTCF-IP-Blobel-Rep2-S1_S2_MACS2_rendition_1E-8_downsampled_try3_peak_776	145	7.7027	14.5288	12.1698	112
chr1	58675664	58676077	Project004-IPSHOCH-Exp5-ChIP-ES-CTCF-IP-Blobel-Rep2-S1_S2_MACS2_rendition_1E-8_downsampled_try3_peak_777	274	13.2733	27.4811	24.914	118
chr1	58734497	58734776	Project004-IPSHOCH-Exp5-ChIP-ES-CTCF-IP-Blobel-Rep2-S1_S2_MACS2_rendition_1E-8_downsampled_try3_peak_778	495	18.0114	49.595	46.756	156
chr1	58754530	58754806	Project004-IPSHOCH-Exp5-ChIP-ES-CTCF-IP-Blobel-Rep2-S1_S2_MACS2_rendition_1E-8_downsampled_try3_peak_779	477	10.0485	47.7242	44.9074	138
chr1	58767065	58767247	Project004-IPSHOCH-Exp5-ChIP-ES-CTCF-IP-Blobel-Rep2-S1_S2_MACS2_rendition_1E-8_downsampled_try3_peak_780	104	6.44737	10.452	8.18571	31
chr1	58803767	58804123	Project004-IPSHOCH-Exp5-ChIP-ES-CTCF-IP-Blobel-Rep2-S1_S2_MACS2_rendition_1E-8_downsampled_try3_peak_781	710	20.625	71.0769	67.9713	180
chr1	58818380	58818622	Project004-IPSHOCH-Exp5-ChIP-ES-CTCF-IP-Blobel-Rep2-S1_S2_MACS2_rendition_1E-8_downsampled_try3_peak_782	123	6.89189	12.3237	10.0163	83
chr1	58826899	58827160	Project004-IPSHOCH-Exp5-ChIP-ES-CTCF-IP-Blobel-Rep2-S1_S2_MACS2_rendition_1E-8_downsampled_try3_peak_783	462	17.4324	46.2512	43.4487	178
chr1	58859319	58859572	Project004-IPSHOCH-Exp5-ChIP-ES-CTCF-IP-Blobel-Rep2-S1_S2_MACS2_rendition_1E-8_downsampled_try3_peak_784	204	10.7207	20.4889	18.022	95
chr1	58954484	58954786	Project004-IPSHOCH-Exp5-ChIP-ES-CTCF-IP-Blobel-Rep2-S1_S2_MACS2_rendition_1E-8_downsampled_try3_peak_785	709	23.9189	70.9547	67.8579	155
chr1	59050698	59050930	Project004-IPSHOCH-Exp5-ChIP-ES-CTCF-IP-Blobel-Rep2-S1_S2_MACS2_rendition_1E-8_downsampled_try3_peak_786	348	14.1892	34.8116	32.1534	115
chr1	59066134	59066372	Project004-IPSHOCH-Exp5-ChIP-ES-CTCF-IP-Blobel-Rep2-S1_S2_MACS2_rendition_1E-8_downsampled_try3_peak_787	390	16.669	39.0337	36.32	124
chr1	59124920	59125152	Project004-IPSHOCH-Exp5-ChIP-ES-CTCF-IP-Blobel-Rep2-S1_S2_MACS2_rendition_1E-8_downsampled_try3_peak_788	414	14.7638	41.4833	38.7407	109
chr1	59127751	59128262	Project004-IPSHOCH-Exp5-ChIP-ES-CTCF-IP-Blobel-Rep2-S1_S2_MACS2_rendition_1E-8_downsampled_try3_peak_789	578	21.8646	57.8828	54.9441	141
chr1	59199630	59200084	Project004-IPSHOCH-Exp5-ChIP-ES-CTCF-IP-Blobel-Rep2-S1_S2_MACS2_rendition_1E-8_downsampled_try3_peak_790	1195	40.1581	119.555	115.793	234
chr1	59201334	59201735	Project004-IPSHOCH-Exp5-ChIP-ES-CTCF-IP-Blobel-Rep2-S1_S2_MACS2_rendition_1E-8_downsampled_try3_peak_791	1018	35.2177	101.874	98.3644	231
chr1	59207463	59207666	Project004-IPSHOCH-Exp5-ChIP-ES-CTCF-IP-Blobel-Rep2-S1_S2_MACS2_rendition_1E-8_downsampled_try3_peak_792	202	9.35115	20.2982	17.8423	70
chr1	59294806	59295128	Project004-IPSHOCH-Exp5-ChIP-ES-CTCF-IP-Blobel-Rep2-S1_S2_MACS2_rendition_1E-8_downsampled_try3_peak_793	1016	29.9237	101.683	98.1811	160
chr1	59300686	59300947	Project004-IPSHOCH-Exp5-ChIP-ES-CTCF-IP-Blobel-Rep2-S1_S2_MACS2_rendition_1E-8_downsampled_try3_peak_794	326	11.875	32.6367	30.0024	128
chr1	59304506	59304863	Project004-IPSHOCH-Exp5-ChIP-ES-CTCF-IP-Blobel-Rep2-S1_S2_MACS2_rendition_1E-8_downsampled_try3_peak_795	1184	35.2703	118.483	114.736	157
chr1	59343249	59343700	Project004-IPSHOCH-Exp5-ChIP-ES-CTCF-IP-Blobel-Rep2-S1_S2_MACS2_rendition_1E-8_downsampled_try3_peak_796	760	26.8752	76.0806	72.9163	253
chr1	59357829	59358078	Project004-IPSHOCH-Exp5-ChIP-ES-CTCF-IP-Blobel-Rep2-S1_S2_MACS2_rendition_1E-8_downsampled_try3_peak_797	254	11.3514	25.4413	22.9023	109
chr1	59373615	59373940	Project004-IPSHOCH-Exp5-ChIP-ES-CTCF-IP-Blobel-Rep2-S1_S2_MACS2_rendition_1E-8_downsampled_try3_peak_798	826	25.3557	82.6963	79.4467	169
chr1	59484057	59484288	Project004-IPSHOCH-Exp5-ChIP-ES-CTCF-IP-Blobel-Rep2-S1_S2_MACS2_rendition_1E-8_downsampled_try3_peak_799	391	16.3096	39.1353	36.4215	115
chr1	59497993	59498192	Project004-IPSHOCH-Exp5-ChIP-ES-CTCF-IP-Blobel-Rep2-S1_S2_MACS2_rendition_1E-8_downsampled_try3_peak_800	186	7.37288	18.6225	16.19	65
chr1	59510279	59510589	Project004-IPSHOCH-Exp5-ChIP-ES-CTCF-IP-Blobel-Rep2-S1_S2_MACS2_rendition_1E-8_downsampled_try3_peak_801	294	12.9597	29.4094	26.8145	152
chr1	59528562	59528805	Project004-IPSHOCH-Exp5-ChIP-ES-CTCF-IP-Blobel-Rep2-S1_S2_MACS2_rendition_1E-8_downsampled_try3_peak_802	226	10.0992	22.6994	20.2051	119
chr1	59540604	59540931	Project004-IPSHOCH-Exp5-ChIP-ES-CTCF-IP-Blobel-Rep2-S1_S2_MACS2_rendition_1E-8_downsampled_try3_peak_803	458	15.501	45.8033	43.0112	132
chr1	59574746	59575002	Project004-IPSHOCH-Exp5-ChIP-ES-CTCF-IP-Blobel-Rep2-S1_S2_MACS2_rendition_1E-8_downsampled_try3_peak_804	112	6.47705	11.2418	8.96616	107
chr1	59580198	59580607	Project004-IPSHOCH-Exp5-ChIP-ES-CTCF-IP-Blobel-Rep2-S1_S2_MACS2_rendition_1E-8_downsampled_try3_peak_805	861	23.75	86.1941	82.8961	221
chr1	59620373	59620544	Project004-IPSHOCH-Exp5-ChIP-ES-CTCF-IP-Blobel-Rep2-S1_S2_MACS2_rendition_1E-8_downsampled_try3_peak_806	179	8.60306	17.9648	15.5427	64
chr1	59627314	59627507	Project004-IPSHOCH-Exp5-ChIP-ES-CTCF-IP-Blobel-Rep2-S1_S2_MACS2_rendition_1E-8_downsampled_try3_peak_807	250	11.8433	25.0904	22.5581	107
chr1	59637865	59638041	Project004-IPSHOCH-Exp5-ChIP-ES-CTCF-IP-Blobel-Rep2-S1_S2_MACS2_rendition_1E-8_downsampled_try3_peak_808	195	8.95095	19.5989	17.1498	58
chr1	59641474	59641951	Project004-IPSHOCH-Exp5-ChIP-ES-CTCF-IP-Blobel-Rep2-S1_S2_MACS2_rendition_1E-8_downsampled_try3_peak_809	1774	49.52	177.461	172.831	214
chr1	59660854	59661177	Project004-IPSHOCH-Exp5-ChIP-ES-CTCF-IP-Blobel-Rep2-S1_S2_MACS2_rendition_1E-8_downsampled_try3_peak_810	437	17.2796	43.7133	40.9445	128
chr1	59665770	59666660	Project004-IPSHOCH-Exp5-ChIP-ES-CTCF-IP-Blobel-Rep2-S1_S2_MACS2_rendition_1E-8_downsampled_try3_peak_811	779	17.5714	77.9796	74.7934	701
chr1	59667818	59668157	Project004-IPSHOCH-Exp5-ChIP-ES-CTCF-IP-Blobel-Rep2-S1_S2_MACS2_rendition_1E-8_downsampled_try3_peak_812	433	16.6216	43.3264	40.5603	162
chr1	59670458	59671144	Project004-IPSHOCH-Exp5-ChIP-ES-CTCF-IP-Blobel-Rep2-S1_S2_MACS2_rendition_1E-8_downsampled_try3_peak_813	1995	44.6875	199.568	194.642	392
chr1	59680153	59680542	Project004-IPSHOCH-Exp5-ChIP-ES-CTCF-IP-Blobel-Rep2-S1_S2_MACS2_rendition_1E-8_downsampled_try3_peak_814	1079	24.661	107.91	104.317	217
chr1	59683958	59684239	Project004-IPSHOCH-Exp5-ChIP-ES-CTCF-IP-Blobel-Rep2-S1_S2_MACS2_rendition_1E-8_downsampled_try3_peak_815	237	11.0604	23.7752	21.2628	127
chr1	59687510	59687950	Project004-IPSHOCH-Exp5-ChIP-ES-CTCF-IP-Blobel-Rep2-S1_S2_MACS2_rendition_1E-8_downsampled_try3_peak_816	278	12.7543	27.8153	25.2439	290
chr1	59695267	59695573	Project004-IPSHOCH-Exp5-ChIP-ES-CTCF-IP-Blobel-Rep2-S1_S2_MACS2_rendition_1E-8_downsampled_try3_peak_817	254	11.3514	25.4413	22.9023	150
chr1	59713980	59714262	Project004-IPSHOCH-Exp5-ChIP-ES-CTCF-IP-Blobel-Rep2-S1_S2_MACS2_rendition_1E-8_downsampled_try3_peak_818	146	8.02444	14.6156	12.2556	124
chr1	59718200	59718388	Project004-IPSHOCH-Exp5-ChIP-ES-CTCF-IP-Blobel-Rep2-S1_S2_MACS2_rendition_1E-8_downsampled_try3_peak_819	166	6.86441	16.6443	14.2447	96
chr1	59736806	59737013	Project004-IPSHOCH-Exp5-ChIP-ES-CTCF-IP-Blobel-Rep2-S1_S2_MACS2_rendition_1E-8_downsampled_try3_peak_820	127	7.65766	12.7801	10.457	64
chr1	59746324	59746634	Project004-IPSHOCH-Exp5-ChIP-ES-CTCF-IP-Blobel-Rep2-S1_S2_MACS2_rendition_1E-8_downsampled_try3_peak_821	315	12.7176	31.5727	28.9552	157
chr1	59747374	59747742	Project004-IPSHOCH-Exp5-ChIP-ES-CTCF-IP-Blobel-Rep2-S1_S2_MACS2_rendition_1E-8_downsampled_try3_peak_822	376	15.051	37.6927	34.9986	129
chr1	59758627	59759082	Project004-IPSHOCH-Exp5-ChIP-ES-CTCF-IP-Blobel-Rep2-S1_S2_MACS2_rendition_1E-8_downsampled_try3_peak_823	429	14.375	42.9238	40.1617	160
chr1	59776651	59777394	Project004-IPSHOCH-Exp5-ChIP-ES-CTCF-IP-Blobel-Rep2-S1_S2_MACS2_rendition_1E-8_downsampled_try3_peak_824	1016	21.2143	101.683	98.1811	346
chr1	59806558	59806933	Project004-IPSHOCH-Exp5-ChIP-ES-CTCF-IP-Blobel-Rep2-S1_S2_MACS2_rendition_1E-8_downsampled_try3_peak_825	655	14.2593	65.5017	62.4726	149
chr1	59840974	59841148	Project004-IPSHOCH-Exp5-ChIP-ES-CTCF-IP-Blobel-Rep2-S1_S2_MACS2_rendition_1E-8_downsampled_try3_peak_826	168	8.51351	16.8225	14.4184	48
chr1	59841223	59841447	Project004-IPSHOCH-Exp5-ChIP-ES-CTCF-IP-Blobel-Rep2-S1_S2_MACS2_rendition_1E-8_downsampled_try3_peak_827	125	7.28819	12.5684	10.2558	82
chr1	59869555	59869889	Project004-IPSHOCH-Exp5-ChIP-ES-CTCF-IP-Blobel-Rep2-S1_S2_MACS2_rendition_1E-8_downsampled_try3_peak_828	169	9.1531	16.9255	14.5197	269
chr1	59919461	59919763	Project004-IPSHOCH-Exp5-ChIP-ES-CTCF-IP-Blobel-Rep2-S1_S2_MACS2_rendition_1E-8_downsampled_try3_peak_829	468	18.676	46.854	44.048	141
chr1	59940539	59941027	Project004-IPSHOCH-Exp5-ChIP-ES-CTCF-IP-Blobel-Rep2-S1_S2_MACS2_rendition_1E-8_downsampled_try3_peak_830	2290	67.8979	229.014	223.748	247
chr1	59949723	59949937	Project004-IPSHOCH-Exp5-ChIP-ES-CTCF-IP-Blobel-Rep2-S1_S2_MACS2_rendition_1E-8_downsampled_try3_peak_831	302	12.3435	30.2642	27.6643	105
chr1	60024222	60024441	Project004-IPSHOCH-Exp5-ChIP-ES-CTCF-IP-Blobel-Rep2-S1_S2_MACS2_rendition_1E-8_downsampled_try3_peak_832	272	10.987	27.2134	24.6534	100
chr1	60029976	60030202	Project004-IPSHOCH-Exp5-ChIP-ES-CTCF-IP-Blobel-Rep2-S1_S2_MACS2_rendition_1E-8_downsampled_try3_peak_833	207	9.30899	20.7615	18.2926	97
chr1	60052530	60052880	Project004-IPSHOCH-Exp5-ChIP-ES-CTCF-IP-Blobel-Rep2-S1_S2_MACS2_rendition_1E-8_downsampled_try3_peak_834	736	25.4874	73.6894	70.5571	190
chr1	60057345	60057666	Project004-IPSHOCH-Exp5-ChIP-ES-CTCF-IP-Blobel-Rep2-S1_S2_MACS2_rendition_1E-8_downsampled_try3_peak_835	430	14.8414	43.0835	40.3211	184
chr1	60062407	60062639	Project004-IPSHOCH-Exp5-ChIP-ES-CTCF-IP-Blobel-Rep2-S1_S2_MACS2_rendition_1E-8_downsampled_try3_peak_836	198	10.0213	19.842	17.3891	134
chr1	60065442	60065746	Project004-IPSHOCH-Exp5-ChIP-ES-CTCF-IP-Blobel-Rep2-S1_S2_MACS2_rendition_1E-8_downsampled_try3_peak_837	318	14.8048	31.8784	29.254	162
chr1	60111486	60111863	Project004-IPSHOCH-Exp5-ChIP-ES-CTCF-IP-Blobel-Rep2-S1_S2_MACS2_rendition_1E-8_downsampled_try3_peak_838	840	26.6256	84.042	80.7743	176
chr1	60161455	60161753	Project004-IPSHOCH-Exp5-ChIP-ES-CTCF-IP-Blobel-Rep2-S1_S2_MACS2_rendition_1E-8_downsampled_try3_peak_839	543	20.3036	54.3842	51.4851	148
chr1	60209673	60209869	Project004-IPSHOCH-Exp5-ChIP-ES-CTCF-IP-Blobel-Rep2-S1_S2_MACS2_rendition_1E-8_downsampled_try3_peak_840	221	11.0801	22.13	19.6384	76
chr1	60215408	60215571	Project004-IPSHOCH-Exp5-ChIP-ES-CTCF-IP-Blobel-Rep2-S1_S2_MACS2_rendition_1E-8_downsampled_try3_peak_841	142	7.77583	14.2065	11.8556	36
chr1	60224233	60224421	Project004-IPSHOCH-Exp5-ChIP-ES-CTCF-IP-Blobel-Rep2-S1_S2_MACS2_rendition_1E-8_downsampled_try3_peak_842	189	9.50379	18.9809	16.546	74
chr1	60253647	60254095	Project004-IPSHOCH-Exp5-ChIP-ES-CTCF-IP-Blobel-Rep2-S1_S2_MACS2_rendition_1E-8_downsampled_try3_peak_843	1079	24.661	107.91	104.317	215
chr1	60289575	60289857	Project004-IPSHOCH-Exp5-ChIP-ES-CTCF-IP-Blobel-Rep2-S1_S2_MACS2_rendition_1E-8_downsampled_try3_peak_844	204	10.7207	20.4889	18.022	123
chr1	60329374	60329617	Project004-IPSHOCH-Exp5-ChIP-ES-CTCF-IP-Blobel-Rep2-S1_S2_MACS2_rendition_1E-8_downsampled_try3_peak_845	251	10.8473	25.1635	22.6308	121
chr1	60397763	60397987	Project004-IPSHOCH-Exp5-ChIP-ES-CTCF-IP-Blobel-Rep2-S1_S2_MACS2_rendition_1E-8_downsampled_try3_peak_846	241	10.93	24.1325	21.6174	148
chr1	60439470	60439633	Project004-IPSHOCH-Exp5-ChIP-ES-CTCF-IP-Blobel-Rep2-S1_S2_MACS2_rendition_1E-8_downsampled_try3_peak_847	173	9.11023	17.3301	14.9216	74
chr1	60461805	60462075	Project004-IPSHOCH-Exp5-ChIP-ES-CTCF-IP-Blobel-Rep2-S1_S2_MACS2_rendition_1E-8_downsampled_try3_peak_848	537	19.4595	53.7338	50.8462	125
chr1	60468177	60468460	Project004-IPSHOCH-Exp5-ChIP-ES-CTCF-IP-Blobel-Rep2-S1_S2_MACS2_rendition_1E-8_downsampled_try3_peak_849	228	10.5405	22.8938	20.394	144
chr1	60480791	60481053	Project004-IPSHOCH-Exp5-ChIP-ES-CTCF-IP-Blobel-Rep2-S1_S2_MACS2_rendition_1E-8_downsampled_try3_peak_850	230	9.375	23.0745	20.5725	121
chr1	60485766	60486178	Project004-IPSHOCH-Exp5-ChIP-ES-CTCF-IP-Blobel-Rep2-S1_S2_MACS2_rendition_1E-8_downsampled_try3_peak_851	681	20	68.1289	65.0626	250
chr1	60498261	60498626	Project004-IPSHOCH-Exp5-ChIP-ES-CTCF-IP-Blobel-Rep2-S1_S2_MACS2_rendition_1E-8_downsampled_try3_peak_852	522	19.0541	52.2186	49.3492	162
chr1	60504001	60504304	Project004-IPSHOCH-Exp5-ChIP-ES-CTCF-IP-Blobel-Rep2-S1_S2_MACS2_rendition_1E-8_downsampled_try3_peak_853	511	19.3397	51.1148	48.2549	146
chr1	60505560	60505806	Project004-IPSHOCH-Exp5-ChIP-ES-CTCF-IP-Blobel-Rep2-S1_S2_MACS2_rendition_1E-8_downsampled_try3_peak_854	197	8.4375	19.7116	17.2597	105
chr1	60591786	60592091	Project004-IPSHOCH-Exp5-ChIP-ES-CTCF-IP-Blobel-Rep2-S1_S2_MACS2_rendition_1E-8_downsampled_try3_peak_855	567	20.2703	56.7908	53.8633	180
chr1	60615454	60615683	Project004-IPSHOCH-Exp5-ChIP-ES-CTCF-IP-Blobel-Rep2-S1_S2_MACS2_rendition_1E-8_downsampled_try3_peak_856	140	7.43951	14.0878	11.7379	70
chr1	60777087	60777378	Project004-IPSHOCH-Exp5-ChIP-ES-CTCF-IP-Blobel-Rep2-S1_S2_MACS2_rendition_1E-8_downsampled_try3_peak_857	390	16.669	39.0337	36.32	130
chr1	60835688	60835905	Project004-IPSHOCH-Exp5-ChIP-ES-CTCF-IP-Blobel-Rep2-S1_S2_MACS2_rendition_1E-8_downsampled_try3_peak_858	292	13.2098	29.2008	26.611	100
chr1	60879792	60880155	Project004-IPSHOCH-Exp5-ChIP-ES-CTCF-IP-Blobel-Rep2-S1_S2_MACS2_rendition_1E-8_downsampled_try3_peak_859	1077	35.0744	107.708	104.116	201
chr1	60914238	60914445	Project004-IPSHOCH-Exp5-ChIP-ES-CTCF-IP-Blobel-Rep2-S1_S2_MACS2_rendition_1E-8_downsampled_try3_peak_860	175	7.8125	17.5473	15.1358	110
chr1	60917474	60917827	Project004-IPSHOCH-Exp5-ChIP-ES-CTCF-IP-Blobel-Rep2-S1_S2_MACS2_rendition_1E-8_downsampled_try3_peak_861	988	23.1356	98.861	95.3927	196
chr1	60925251	60925799	Project004-IPSHOCH-Exp5-ChIP-ES-CTCF-IP-Blobel-Rep2-S1_S2_MACS2_rendition_1E-8_downsampled_try3_peak_862	1587	49.5113	158.704	154.339	213
chr1	61011762	61012083	Project004-IPSHOCH-Exp5-ChIP-ES-CTCF-IP-Blobel-Rep2-S1_S2_MACS2_rendition_1E-8_downsampled_try3_peak_863	811	24.0341	81.1845	77.9562	161
chr1	61015190	61015450	Project004-IPSHOCH-Exp5-ChIP-ES-CTCF-IP-Blobel-Rep2-S1_S2_MACS2_rendition_1E-8_downsampled_try3_peak_864	447	17.027	44.7837	42	126
chr1	61017969	61018301	Project004-IPSHOCH-Exp5-ChIP-ES-CTCF-IP-Blobel-Rep2-S1_S2_MACS2_rendition_1E-8_downsampled_try3_peak_865	798	19.8305	79.8573	76.6421	179
chr1	61018915	61019307	Project004-IPSHOCH-Exp5-ChIP-ES-CTCF-IP-Blobel-Rep2-S1_S2_MACS2_rendition_1E-8_downsampled_try3_peak_866	348	15.4157	34.8576	32.1984	207
chr1	61112008	61112323	Project004-IPSHOCH-Exp5-ChIP-ES-CTCF-IP-Blobel-Rep2-S1_S2_MACS2_rendition_1E-8_downsampled_try3_peak_867	852	31.1411	85.2291	81.9441	159
chr1	61158480	61158792	Project004-IPSHOCH-Exp5-ChIP-ES-CTCF-IP-Blobel-Rep2-S1_S2_MACS2_rendition_1E-8_downsampled_try3_peak_868	546	20.9535	54.684	51.7833	161
chr1	61182031	61182242	Project004-IPSHOCH-Exp5-ChIP-ES-CTCF-IP-Blobel-Rep2-S1_S2_MACS2_rendition_1E-8_downsampled_try3_peak_869	233	11.4956	23.3691	20.8594	125
chr1	61196045	61196362	Project004-IPSHOCH-Exp5-ChIP-ES-CTCF-IP-Blobel-Rep2-S1_S2_MACS2_rendition_1E-8_downsampled_try3_peak_870	906	32.6727	90.6821	87.3269	162
chr1	61237914	61238358	Project004-IPSHOCH-Exp5-ChIP-ES-CTCF-IP-Blobel-Rep2-S1_S2_MACS2_rendition_1E-8_downsampled_try3_peak_871	1292	37.7027	129.225	125.316	222
chr1	61354810	61355198	Project004-IPSHOCH-Exp5-ChIP-ES-CTCF-IP-Blobel-Rep2-S1_S2_MACS2_rendition_1E-8_downsampled_try3_peak_872	925	33.1832	92.5134	89.1277	221
chr1	61433925	61434259	Project004-IPSHOCH-Exp5-ChIP-ES-CTCF-IP-Blobel-Rep2-S1_S2_MACS2_rendition_1E-8_downsampled_try3_peak_873	1079	24.661	107.91	104.317	186
chr1	61571502	61571774	Project004-IPSHOCH-Exp5-ChIP-ES-CTCF-IP-Blobel-Rep2-S1_S2_MACS2_rendition_1E-8_downsampled_try3_peak_874	433	14.5958	43.3476	40.5815	128
chr1	61787591	61787819	Project004-IPSHOCH-Exp5-ChIP-ES-CTCF-IP-Blobel-Rep2-S1_S2_MACS2_rendition_1E-8_downsampled_try3_peak_875	260	12.7628	26.0473	23.4987	127
chr1	61817776	61818200	Project004-IPSHOCH-Exp5-ChIP-ES-CTCF-IP-Blobel-Rep2-S1_S2_MACS2_rendition_1E-8_downsampled_try3_peak_876	1265	42.3724	126.523	122.651	234
chr1	61823649	61823851	Project004-IPSHOCH-Exp5-ChIP-ES-CTCF-IP-Blobel-Rep2-S1_S2_MACS2_rendition_1E-8_downsampled_try3_peak_877	218	11.2312	21.8505	19.3628	71
chr1	61971582	61971824	Project004-IPSHOCH-Exp5-ChIP-ES-CTCF-IP-Blobel-Rep2-S1_S2_MACS2_rendition_1E-8_downsampled_try3_peak_878	506	20.9309	50.6795	47.8272	138
chr1	62013740	62014109	Project004-IPSHOCH-Exp5-ChIP-ES-CTCF-IP-Blobel-Rep2-S1_S2_MACS2_rendition_1E-8_downsampled_try3_peak_879	681	20	68.1289	65.0626	137
chr1	62424868	62425287	Project004-IPSHOCH-Exp5-ChIP-ES-CTCF-IP-Blobel-Rep2-S1_S2_MACS2_rendition_1E-8_downsampled_try3_peak_880	839	29.868	83.9903	80.7247	262
chr1	62743572	62743890	Project004-IPSHOCH-Exp5-ChIP-ES-CTCF-IP-Blobel-Rep2-S1_S2_MACS2_rendition_1E-8_downsampled_try3_peak_881	790	25.9459	79.0852	75.8808	172
chr1	62747608	62748153	Project004-IPSHOCH-Exp5-ChIP-ES-CTCF-IP-Blobel-Rep2-S1_S2_MACS2_rendition_1E-8_downsampled_try3_peak_882	1597	48.7768	159.739	155.367	211
chr1	62764533	62764823	Project004-IPSHOCH-Exp5-ChIP-ES-CTCF-IP-Blobel-Rep2-S1_S2_MACS2_rendition_1E-8_downsampled_try3_peak_883	530	20.498	53.0985	50.2166	134
chr1	62769096	62769503	Project004-IPSHOCH-Exp5-ChIP-ES-CTCF-IP-Blobel-Rep2-S1_S2_MACS2_rendition_1E-8_downsampled_try3_peak_884	1552	36.875	155.212	150.906	200
chr1	62784869	62785158	Project004-IPSHOCH-Exp5-ChIP-ES-CTCF-IP-Blobel-Rep2-S1_S2_MACS2_rendition_1E-8_downsampled_try3_peak_885	286	12.1381	28.6339	26.055	136
chr1	62789934	62790097	Project004-IPSHOCH-Exp5-ChIP-ES-CTCF-IP-Blobel-Rep2-S1_S2_MACS2_rendition_1E-8_downsampled_try3_peak_886	135	7.39402	13.5753	11.2386	22
chr1	62821484	62821853	Project004-IPSHOCH-Exp5-ChIP-ES-CTCF-IP-Blobel-Rep2-S1_S2_MACS2_rendition_1E-8_downsampled_try3_peak_887	277	11.9707	27.7204	25.1518	116
chr1	62829918	62830081	Project004-IPSHOCH-Exp5-ChIP-ES-CTCF-IP-Blobel-Rep2-S1_S2_MACS2_rendition_1E-8_downsampled_try3_peak_888	268	10.4709	26.8636	24.3057	76
chr1	62832802	62833250	Project004-IPSHOCH-Exp5-ChIP-ES-CTCF-IP-Blobel-Rep2-S1_S2_MACS2_rendition_1E-8_downsampled_try3_peak_889	1050	27.5	105.08	101.525	215
chr1	62842108	62842773	Project004-IPSHOCH-Exp5-ChIP-ES-CTCF-IP-Blobel-Rep2-S1_S2_MACS2_rendition_1E-8_downsampled_try3_peak_890	857	30.3497	85.758	82.4641	516
chr1	62866731	62867094	Project004-IPSHOCH-Exp5-ChIP-ES-CTCF-IP-Blobel-Rep2-S1_S2_MACS2_rendition_1E-8_downsampled_try3_peak_891	1238	36.4865	123.832	120.005	216
chr1	62976086	62976674	Project004-IPSHOCH-Exp5-ChIP-ES-CTCF-IP-Blobel-Rep2-S1_S2_MACS2_rendition_1E-8_downsampled_try3_peak_892	1132	22.9286	113.289	109.611	205
chr1	63010908	63011237	Project004-IPSHOCH-Exp5-ChIP-ES-CTCF-IP-Blobel-Rep2-S1_S2_MACS2_rendition_1E-8_downsampled_try3_peak_893	1249	39.6053	124.978	121.132	173
chr1	63013574	63013845	Project004-IPSHOCH-Exp5-ChIP-ES-CTCF-IP-Blobel-Rep2-S1_S2_MACS2_rendition_1E-8_downsampled_try3_peak_894	671	23.7595	67.1259	64.0766	120
chr1	63031029	63031371	Project004-IPSHOCH-Exp5-ChIP-ES-CTCF-IP-Blobel-Rep2-S1_S2_MACS2_rendition_1E-8_downsampled_try3_peak_895	957	29.3665	95.7031	92.2821	210
chr1	63032867	63033174	Project004-IPSHOCH-Exp5-ChIP-ES-CTCF-IP-Blobel-Rep2-S1_S2_MACS2_rendition_1E-8_downsampled_try3_peak_896	1031	21.4286	103.119	99.5943	165
chr1	63135211	63135633	Project004-IPSHOCH-Exp5-ChIP-ES-CTCF-IP-Blobel-Rep2-S1_S2_MACS2_rendition_1E-8_downsampled_try3_peak_897	1093	34.847	109.374	105.759	221
chr1	63137299	63137729	Project004-IPSHOCH-Exp5-ChIP-ES-CTCF-IP-Blobel-Rep2-S1_S2_MACS2_rendition_1E-8_downsampled_try3_peak_898	351	14.7639	35.1124	32.4454	234
chr1	63147531	63147774	Project004-IPSHOCH-Exp5-ChIP-ES-CTCF-IP-Blobel-Rep2-S1_S2_MACS2_rendition_1E-8_downsampled_try3_peak_899	391	15.9015	39.1555	36.4417	121
chr1	63157475	63157857	Project004-IPSHOCH-Exp5-ChIP-ES-CTCF-IP-Blobel-Rep2-S1_S2_MACS2_rendition_1E-8_downsampled_try3_peak_900	985	29.87	98.5874	95.1256	154
chr1	63161119	63161371	Project004-IPSHOCH-Exp5-ChIP-ES-CTCF-IP-Blobel-Rep2-S1_S2_MACS2_rendition_1E-8_downsampled_try3_peak_901	280	11.4572	28.0601	25.4838	104
chr1	63192812	63193015	Project004-IPSHOCH-Exp5-ChIP-ES-CTCF-IP-Blobel-Rep2-S1_S2_MACS2_rendition_1E-8_downsampled_try3_peak_902	197	9.35349	19.7705	17.3186	107
chr1	63227369	63228051	Project004-IPSHOCH-Exp5-ChIP-ES-CTCF-IP-Blobel-Rep2-S1_S2_MACS2_rendition_1E-8_downsampled_try3_peak_903	1410	22.5	141.018	136.932	464
chr1	63228820	63229565	Project004-IPSHOCH-Exp5-ChIP-ES-CTCF-IP-Blobel-Rep2-S1_S2_MACS2_rendition_1E-8_downsampled_try3_peak_904	933	28.0535	93.3404	89.9491	584
chr1	63238656	63238850	Project004-IPSHOCH-Exp5-ChIP-ES-CTCF-IP-Blobel-Rep2-S1_S2_MACS2_rendition_1E-8_downsampled_try3_peak_905	174	9.16011	17.4124	15.0038	75
chr1	63251023	63251230	Project004-IPSHOCH-Exp5-ChIP-ES-CTCF-IP-Blobel-Rep2-S1_S2_MACS2_rendition_1E-8_downsampled_try3_peak_906	170	6.42857	17.0335	14.6269	103
chr1	63259549	63259732	Project004-IPSHOCH-Exp5-ChIP-ES-CTCF-IP-Blobel-Rep2-S1_S2_MACS2_rendition_1E-8_downsampled_try3_peak_907	128	5.84746	12.8808	10.5568	65
chr1	63265882	63266314	Project004-IPSHOCH-Exp5-ChIP-ES-CTCF-IP-Blobel-Rep2-S1_S2_MACS2_rendition_1E-8_downsampled_try3_peak_908	971	25.9375	97.1189	93.6762	178
chr1	63288904	63289178	Project004-IPSHOCH-Exp5-ChIP-ES-CTCF-IP-Blobel-Rep2-S1_S2_MACS2_rendition_1E-8_downsampled_try3_peak_909	259	7.77778	25.9868	23.4451	127
chr1	63450185	63450521	Project004-IPSHOCH-Exp5-ChIP-ES-CTCF-IP-Blobel-Rep2-S1_S2_MACS2_rendition_1E-8_downsampled_try3_peak_910	1018	26.875	101.88	98.3672	153
chr1	63656233	63656556	Project004-IPSHOCH-Exp5-ChIP-ES-CTCF-IP-Blobel-Rep2-S1_S2_MACS2_rendition_1E-8_downsampled_try3_peak_911	552	19.8649	55.2579	52.3488	154
chr1	63704552	63704977	Project004-IPSHOCH-Exp5-ChIP-ES-CTCF-IP-Blobel-Rep2-S1_S2_MACS2_rendition_1E-8_downsampled_try3_peak_912	968	18.7037	96.8773	93.439	223
chr1	63706158	63706449	Project004-IPSHOCH-Exp5-ChIP-ES-CTCF-IP-Blobel-Rep2-S1_S2_MACS2_rendition_1E-8_downsampled_try3_peak_913	567	22.1601	56.7381	53.8142	148
chr1	63715370	63715711	Project004-IPSHOCH-Exp5-ChIP-ES-CTCF-IP-Blobel-Rep2-S1_S2_MACS2_rendition_1E-8_downsampled_try3_peak_914	404	15.8108	40.4434	37.7123	208
chr1	63809689	63810050	Project004-IPSHOCH-Exp5-ChIP-ES-CTCF-IP-Blobel-Rep2-S1_S2_MACS2_rendition_1E-8_downsampled_try3_peak_915	362	14.5946	36.202	33.5264	212
chr1	63901419	63901706	Project004-IPSHOCH-Exp5-ChIP-ES-CTCF-IP-Blobel-Rep2-S1_S2_MACS2_rendition_1E-8_downsampled_try3_peak_916	466	17.6635	46.6529	43.8495	133
chr1	63928490	63928699	Project004-IPSHOCH-Exp5-ChIP-ES-CTCF-IP-Blobel-Rep2-S1_S2_MACS2_rendition_1E-8_downsampled_try3_peak_917	303	14.2943	30.3973	27.7914	118
chr1	64000098	64000338	Project004-IPSHOCH-Exp5-ChIP-ES-CTCF-IP-Blobel-Rep2-S1_S2_MACS2_rendition_1E-8_downsampled_try3_peak_918	378	16.7664	37.8095	35.1125	148
chr1	64168332	64168573	Project004-IPSHOCH-Exp5-ChIP-ES-CTCF-IP-Blobel-Rep2-S1_S2_MACS2_rendition_1E-8_downsampled_try3_peak_919	137	7.78609	13.7925	11.454	84
chr1	64465188	64465560	Project004-IPSHOCH-Exp5-ChIP-ES-CTCF-IP-Blobel-Rep2-S1_S2_MACS2_rendition_1E-8_downsampled_try3_peak_920	569	18.5406	56.9717	54.0434	216
chr1	64492651	64492985	Project004-IPSHOCH-Exp5-ChIP-ES-CTCF-IP-Blobel-Rep2-S1_S2_MACS2_rendition_1E-8_downsampled_try3_peak_921	948	29.9869	94.8278	91.414	155
chr1	64494699	64495208	Project004-IPSHOCH-Exp5-ChIP-ES-CTCF-IP-Blobel-Rep2-S1_S2_MACS2_rendition_1E-8_downsampled_try3_peak_922	906	32.6727	90.6821	87.3269	154
chr1	64508165	64508573	Project004-IPSHOCH-Exp5-ChIP-ES-CTCF-IP-Blobel-Rep2-S1_S2_MACS2_rendition_1E-8_downsampled_try3_peak_923	857	27.5676	85.7116	82.4188	224
chr1	64590421	64590680	Project004-IPSHOCH-Exp5-ChIP-ES-CTCF-IP-Blobel-Rep2-S1_S2_MACS2_rendition_1E-8_downsampled_try3_peak_924	335	14.2557	33.5695	30.921	120
chr1	64663969	64664589	Project004-IPSHOCH-Exp5-ChIP-ES-CTCF-IP-Blobel-Rep2-S1_S2_MACS2_rendition_1E-8_downsampled_try3_peak_925	1666	27.5926	166.604	162.125	393
chr1	64702392	64702689	Project004-IPSHOCH-Exp5-ChIP-ES-CTCF-IP-Blobel-Rep2-S1_S2_MACS2_rendition_1E-8_downsampled_try3_peak_926	364	15.1197	36.4083	33.724	145
chr1	64751844	64752197	Project004-IPSHOCH-Exp5-ChIP-ES-CTCF-IP-Blobel-Rep2-S1_S2_MACS2_rendition_1E-8_downsampled_try3_peak_927	557	12.7778	55.7178	52.801	202
chr1	64756441	64756833	Project004-IPSHOCH-Exp5-ChIP-ES-CTCF-IP-Blobel-Rep2-S1_S2_MACS2_rendition_1E-8_downsampled_try3_peak_928	774	25.5405	77.4452	74.2623	231
chr1	64764143	64764501	Project004-IPSHOCH-Exp5-ChIP-ES-CTCF-IP-Blobel-Rep2-S1_S2_MACS2_rendition_1E-8_downsampled_try3_peak_929	955	25.625	95.5421	92.1223	169
chr1	64782451	64782800	Project004-IPSHOCH-Exp5-ChIP-ES-CTCF-IP-Blobel-Rep2-S1_S2_MACS2_rendition_1E-8_downsampled_try3_peak_930	455	15.7938	45.5991	42.8074	200
chr1	64784029	64784309	Project004-IPSHOCH-Exp5-ChIP-ES-CTCF-IP-Blobel-Rep2-S1_S2_MACS2_rendition_1E-8_downsampled_try3_peak_931	403	16.1652	40.3283	37.6008	139
chr1	64965426	64965861	Project004-IPSHOCH-Exp5-ChIP-ES-CTCF-IP-Blobel-Rep2-S1_S2_MACS2_rendition_1E-8_downsampled_try3_peak_932	837	29.1738	83.7444	80.4809	277
chr1	65032830	65033125	Project004-IPSHOCH-Exp5-ChIP-ES-CTCF-IP-Blobel-Rep2-S1_S2_MACS2_rendition_1E-8_downsampled_try3_peak_933	725	24.3243	72.5667	69.4469	132
chr1	65056672	65057329	Project004-IPSHOCH-Exp5-ChIP-ES-CTCF-IP-Blobel-Rep2-S1_S2_MACS2_rendition_1E-8_downsampled_try3_peak_934	1661	45.8108	166.184	161.714	248
chr1	65092893	65093316	Project004-IPSHOCH-Exp5-ChIP-ES-CTCF-IP-Blobel-Rep2-S1_S2_MACS2_rendition_1E-8_downsampled_try3_peak_935	700	18.0509	70.0029	66.9143	286
chr1	65122224	65122534	Project004-IPSHOCH-Exp5-ChIP-ES-CTCF-IP-Blobel-Rep2-S1_S2_MACS2_rendition_1E-8_downsampled_try3_peak_936	380	16.4741	38.0049	35.3004	151
chr1	65158592	65159047	Project004-IPSHOCH-Exp5-ChIP-ES-CTCF-IP-Blobel-Rep2-S1_S2_MACS2_rendition_1E-8_downsampled_try3_peak_937	1396	44.3203	139.638	135.573	189
chr1	65208910	65209073	Project004-IPSHOCH-Exp5-ChIP-ES-CTCF-IP-Blobel-Rep2-S1_S2_MACS2_rendition_1E-8_downsampled_try3_peak_938	153	8.20782	15.368	12.9935	112
chr1	65224786	65225148	Project004-IPSHOCH-Exp5-ChIP-ES-CTCF-IP-Blobel-Rep2-S1_S2_MACS2_rendition_1E-8_downsampled_try3_peak_939	1074	22.0714	107.453	103.865	190
chr1	65225744	65226127	Project004-IPSHOCH-Exp5-ChIP-ES-CTCF-IP-Blobel-Rep2-S1_S2_MACS2_rendition_1E-8_downsampled_try3_peak_940	834	16.8518	83.4664	80.2039	174
chr1	65226242	65226919	Project004-IPSHOCH-Exp5-ChIP-ES-CTCF-IP-Blobel-Rep2-S1_S2_MACS2_rendition_1E-8_downsampled_try3_peak_941	1194	37.648	119.461	115.7	367
chr1	65232182	65232484	Project004-IPSHOCH-Exp5-ChIP-ES-CTCF-IP-Blobel-Rep2-S1_S2_MACS2_rendition_1E-8_downsampled_try3_peak_942	429	14.375	42.9238	40.1617	153
chr1	65329369	65329738	Project004-IPSHOCH-Exp5-ChIP-ES-CTCF-IP-Blobel-Rep2-S1_S2_MACS2_rendition_1E-8_downsampled_try3_peak_943	908	24.6875	90.8436	87.4807	184
chr1	65356709	65357218	Project004-IPSHOCH-Exp5-ChIP-ES-CTCF-IP-Blobel-Rep2-S1_S2_MACS2_rendition_1E-8_downsampled_try3_peak_944	792	29.2904	79.294	76.0884	160
chr1	65358756	65359105	Project004-IPSHOCH-Exp5-ChIP-ES-CTCF-IP-Blobel-Rep2-S1_S2_MACS2_rendition_1E-8_downsampled_try3_peak_945	566	17.5	56.6146	53.6917	155
chr1	65359586	65359749	Project004-IPSHOCH-Exp5-ChIP-ES-CTCF-IP-Blobel-Rep2-S1_S2_MACS2_rendition_1E-8_downsampled_try3_peak_946	124	6.25	12.4453	10.1353	68
chr1	65434831	65435252	Project004-IPSHOCH-Exp5-ChIP-ES-CTCF-IP-Blobel-Rep2-S1_S2_MACS2_rendition_1E-8_downsampled_try3_peak_947	1310	36.2825	131.012	127.08	237
chr1	65701144	65701307	Project004-IPSHOCH-Exp5-ChIP-ES-CTCF-IP-Blobel-Rep2-S1_S2_MACS2_rendition_1E-8_downsampled_try3_peak_948	145	7.7027	14.5288	12.1698	78
chr1	66033246	66033505	Project004-IPSHOCH-Exp5-ChIP-ES-CTCF-IP-Blobel-Rep2-S1_S2_MACS2_rendition_1E-8_downsampled_try3_peak_949	191	10.2102	19.1475	16.7048	130
chr1	66146522	66146699	Project004-IPSHOCH-Exp5-ChIP-ES-CTCF-IP-Blobel-Rep2-S1_S2_MACS2_rendition_1E-8_downsampled_try3_peak_950	178	9.6997	17.8272	15.4061	64
chr1	66151176	66151432	Project004-IPSHOCH-Exp5-ChIP-ES-CTCF-IP-Blobel-Rep2-S1_S2_MACS2_rendition_1E-8_downsampled_try3_peak_951	523	21.4414	52.3213	49.4467	119
chr1	66454212	66454517	Project004-IPSHOCH-Exp5-ChIP-ES-CTCF-IP-Blobel-Rep2-S1_S2_MACS2_rendition_1E-8_downsampled_try3_peak_952	333	15.3153	33.3743	30.7315	157
chr1	66702385	66702690	Project004-IPSHOCH-Exp5-ChIP-ES-CTCF-IP-Blobel-Rep2-S1_S2_MACS2_rendition_1E-8_downsampled_try3_peak_953	402	13.75	40.2917	37.5643	145
chr1	66885058	66885472	Project004-IPSHOCH-Exp5-ChIP-ES-CTCF-IP-Blobel-Rep2-S1_S2_MACS2_rendition_1E-8_downsampled_try3_peak_954	975	30.4054	97.5482	94.0964	204
chr1	66894151	66894436	Project004-IPSHOCH-Exp5-ChIP-ES-CTCF-IP-Blobel-Rep2-S1_S2_MACS2_rendition_1E-8_downsampled_try3_peak_955	492	18.2432	49.2158	46.3778	140
chr1	66942300	66943021	Project004-IPSHOCH-Exp5-ChIP-ES-CTCF-IP-Blobel-Rep2-S1_S2_MACS2_rendition_1E-8_downsampled_try3_peak_956	433	16.6216	43.3264	40.5603	157
chr1	66987563	66987950	Project004-IPSHOCH-Exp5-ChIP-ES-CTCF-IP-Blobel-Rep2-S1_S2_MACS2_rendition_1E-8_downsampled_try3_peak_957	780	29.0991	78.0578	74.8656	158
chr1	67039354	67039654	Project004-IPSHOCH-Exp5-ChIP-ES-CTCF-IP-Blobel-Rep2-S1_S2_MACS2_rendition_1E-8_downsampled_try3_peak_958	775	25.0594	77.5161	74.3325	154
chr1	67060848	67061154	Project004-IPSHOCH-Exp5-ChIP-ES-CTCF-IP-Blobel-Rep2-S1_S2_MACS2_rendition_1E-8_downsampled_try3_peak_959	269	7.96296	26.9779	24.4196	119
chr1	67108070	67108387	Project004-IPSHOCH-Exp5-ChIP-ES-CTCF-IP-Blobel-Rep2-S1_S2_MACS2_rendition_1E-8_downsampled_try3_peak_960	784	19.5763	78.4324	75.2379	158
chr1	67190580	67190857	Project004-IPSHOCH-Exp5-ChIP-ES-CTCF-IP-Blobel-Rep2-S1_S2_MACS2_rendition_1E-8_downsampled_try3_peak_961	736	25.4874	73.6894	70.5571	127
chr1	67227748	67228169	Project004-IPSHOCH-Exp5-ChIP-ES-CTCF-IP-Blobel-Rep2-S1_S2_MACS2_rendition_1E-8_downsampled_try3_peak_962	1801	55.8881	180.16	175.492	182
chr1	67264914	67265109	Project004-IPSHOCH-Exp5-ChIP-ES-CTCF-IP-Blobel-Rep2-S1_S2_MACS2_rendition_1E-8_downsampled_try3_peak_963	235	10.5719	23.5184	21.0071	124
chr1	67524578	67525092	Project004-IPSHOCH-Exp5-ChIP-ES-CTCF-IP-Blobel-Rep2-S1_S2_MACS2_rendition_1E-8_downsampled_try3_peak_964	482	15.625	48.2983	45.4731	161
chr1	67568308	67568471	Project004-IPSHOCH-Exp5-ChIP-ES-CTCF-IP-Blobel-Rep2-S1_S2_MACS2_rendition_1E-8_downsampled_try3_peak_965	124	6.25	12.4453	10.1353	60
chr1	67686952	67687304	Project004-IPSHOCH-Exp5-ChIP-ES-CTCF-IP-Blobel-Rep2-S1_S2_MACS2_rendition_1E-8_downsampled_try3_peak_966	727	27.5676	72.7582	69.6309	160
chr1	68153109	68153463	Project004-IPSHOCH-Exp5-ChIP-ES-CTCF-IP-Blobel-Rep2-S1_S2_MACS2_rendition_1E-8_downsampled_try3_peak_967	774	25.5405	77.4452	74.2623	155
chr1	68799388	68799627	Project004-IPSHOCH-Exp5-ChIP-ES-CTCF-IP-Blobel-Rep2-S1_S2_MACS2_rendition_1E-8_downsampled_try3_peak_968	394	17.3574	39.4954	36.7734	109
chr1	69111756	69111948	Project004-IPSHOCH-Exp5-ChIP-ES-CTCF-IP-Blobel-Rep2-S1_S2_MACS2_rendition_1E-8_downsampled_try3_peak_969	140	8.16817	14.0041	11.6555	101
chr1	69185498	69185835	Project004-IPSHOCH-Exp5-ChIP-ES-CTCF-IP-Blobel-Rep2-S1_S2_MACS2_rendition_1E-8_downsampled_try3_peak_970	908	24.6875	90.8436	87.4807	164
chr1	69211827	69212124	Project004-IPSHOCH-Exp5-ChIP-ES-CTCF-IP-Blobel-Rep2-S1_S2_MACS2_rendition_1E-8_downsampled_try3_peak_971	253	10	25.3882	22.8526	137
chr1	69288299	69288665	Project004-IPSHOCH-Exp5-ChIP-ES-CTCF-IP-Blobel-Rep2-S1_S2_MACS2_rendition_1E-8_downsampled_try3_peak_972	1164	29.6875	116.429	112.714	166
chr1	69423457	69423838	Project004-IPSHOCH-Exp5-ChIP-ES-CTCF-IP-Blobel-Rep2-S1_S2_MACS2_rendition_1E-8_downsampled_try3_peak_973	436	12.9661	43.6039	40.8367	145
chr1	69535309	69535491	Project004-IPSHOCH-Exp5-ChIP-ES-CTCF-IP-Blobel-Rep2-S1_S2_MACS2_rendition_1E-8_downsampled_try3_peak_974	127	7.65766	12.7801	10.457	81
chr1	69735610	69735986	Project004-IPSHOCH-Exp5-ChIP-ES-CTCF-IP-Blobel-Rep2-S1_S2_MACS2_rendition_1E-8_downsampled_try3_peak_975	710	20.625	71.0769	67.9713	191
chr1	69804361	69804582	Project004-IPSHOCH-Exp5-ChIP-ES-CTCF-IP-Blobel-Rep2-S1_S2_MACS2_rendition_1E-8_downsampled_try3_peak_976	274	13.2733	27.4811	24.914	142
chr1	69822239	69822671	Project004-IPSHOCH-Exp5-ChIP-ES-CTCF-IP-Blobel-Rep2-S1_S2_MACS2_rendition_1E-8_downsampled_try3_peak_977	458	19.3994	45.8181	43.0208	97
chr1	69831608	69832061	Project004-IPSHOCH-Exp5-ChIP-ES-CTCF-IP-Blobel-Rep2-S1_S2_MACS2_rendition_1E-8_downsampled_try3_peak_978	1017	35.7357	101.767	98.2589	286
chr1	69836835	69837179	Project004-IPSHOCH-Exp5-ChIP-ES-CTCF-IP-Blobel-Rep2-S1_S2_MACS2_rendition_1E-8_downsampled_try3_peak_979	709	23.9189	70.9547	67.8579	175
chr1	70174647	70174957	Project004-IPSHOCH-Exp5-ChIP-ES-CTCF-IP-Blobel-Rep2-S1_S2_MACS2_rendition_1E-8_downsampled_try3_peak_980	301	11.25	30.1722	27.5727	175
chr1	70316721	70317040	Project004-IPSHOCH-Exp5-ChIP-ES-CTCF-IP-Blobel-Rep2-S1_S2_MACS2_rendition_1E-8_downsampled_try3_peak_981	758	25.1351	75.8121	72.6496	171
chr1	70833702	70834101	Project004-IPSHOCH-Exp5-ChIP-ES-CTCF-IP-Blobel-Rep2-S1_S2_MACS2_rendition_1E-8_downsampled_try3_peak_982	945	20.1429	94.5702	91.1584	197
chr1	71083511	71083935	Project004-IPSHOCH-Exp5-ChIP-ES-CTCF-IP-Blobel-Rep2-S1_S2_MACS2_rendition_1E-8_downsampled_try3_peak_983	681	20	68.1289	65.0626	214
chr1	71235169	71235571	Project004-IPSHOCH-Exp5-ChIP-ES-CTCF-IP-Blobel-Rep2-S1_S2_MACS2_rendition_1E-8_downsampled_try3_peak_984	439	18.3062	43.9678	41.1962	261
chr1	71336102	71336478	Project004-IPSHOCH-Exp5-ChIP-ES-CTCF-IP-Blobel-Rep2-S1_S2_MACS2_rendition_1E-8_downsampled_try3_peak_985	1052	36.5813	105.212	101.656	169
chr1	71517583	71517794	Project004-IPSHOCH-Exp5-ChIP-ES-CTCF-IP-Blobel-Rep2-S1_S2_MACS2_rendition_1E-8_downsampled_try3_peak_986	336	15.108	33.6762	31.0276	114
chr1	71552369	71552784	Project004-IPSHOCH-Exp5-ChIP-ES-CTCF-IP-Blobel-Rep2-S1_S2_MACS2_rendition_1E-8_downsampled_try3_peak_987	1389	45.1778	138.907	134.851	260
chr1	71578278	71578648	Project004-IPSHOCH-Exp5-ChIP-ES-CTCF-IP-Blobel-Rep2-S1_S2_MACS2_rendition_1E-8_downsampled_try3_peak_988	861	23.75	86.1941	82.8961	183
chr1	71656082	71656259	Project004-IPSHOCH-Exp5-ChIP-ES-CTCF-IP-Blobel-Rep2-S1_S2_MACS2_rendition_1E-8_downsampled_try3_peak_989	185	9.862	18.5711	16.1422	69
chr1	71722038	71722326	Project004-IPSHOCH-Exp5-ChIP-ES-CTCF-IP-Blobel-Rep2-S1_S2_MACS2_rendition_1E-8_downsampled_try3_peak_990	617	13.7037	61.7887	58.8026	151
chr1	71824919	71825243	Project004-IPSHOCH-Exp5-ChIP-ES-CTCF-IP-Blobel-Rep2-S1_S2_MACS2_rendition_1E-8_downsampled_try3_peak_991	496	19.8896	49.6883	46.8456	129
chr1	72030576	72030771	Project004-IPSHOCH-Exp5-ChIP-ES-CTCF-IP-Blobel-Rep2-S1_S2_MACS2_rendition_1E-8_downsampled_try3_peak_992	202	9.35115	20.2982	17.8423	72
chr1	72170275	72170603	Project004-IPSHOCH-Exp5-ChIP-ES-CTCF-IP-Blobel-Rep2-S1_S2_MACS2_rendition_1E-8_downsampled_try3_peak_993	939	25.3125	93.9706	90.5741	161
chr1	72188109	72188845	Project004-IPSHOCH-Exp5-ChIP-ES-CTCF-IP-Blobel-Rep2-S1_S2_MACS2_rendition_1E-8_downsampled_try3_peak_994	1636	33.5593	163.621	159.191	537
chr1	72212741	72213089	Project004-IPSHOCH-Exp5-ChIP-ES-CTCF-IP-Blobel-Rep2-S1_S2_MACS2_rendition_1E-8_downsampled_try3_peak_995	835	25.8092	83.52	80.2569	185
chr1	72213644	72213959	Project004-IPSHOCH-Exp5-ChIP-ES-CTCF-IP-Blobel-Rep2-S1_S2_MACS2_rendition_1E-8_downsampled_try3_peak_996	452	16.8368	45.2088	42.4219	135
chr1	72256460	72256660	Project004-IPSHOCH-Exp5-ChIP-ES-CTCF-IP-Blobel-Rep2-S1_S2_MACS2_rendition_1E-8_downsampled_try3_peak_997	175	7.8125	17.5473	15.1358	89
chr1	72258813	72259364	Project004-IPSHOCH-Exp5-ChIP-ES-CTCF-IP-Blobel-Rep2-S1_S2_MACS2_rendition_1E-8_downsampled_try3_peak_998	516	18.7541	51.6935	48.8298	122
chr1	72266612	72266936	Project004-IPSHOCH-Exp5-ChIP-ES-CTCF-IP-Blobel-Rep2-S1_S2_MACS2_rendition_1E-8_downsampled_try3_peak_999	580	17.8125	58.0283	55.0872	162
chr1	72271542	72271706	Project004-IPSHOCH-Exp5-ChIP-ES-CTCF-IP-Blobel-Rep2-S1_S2_MACS2_rendition_1E-8_downsampled_try3_peak_1000	185	9.26459	18.581	16.1512	67
chr1	72279216	72279527	Project004-IPSHOCH-Exp5-ChIP-ES-CTCF-IP-Blobel-Rep2-S1_S2_MACS2_rendition_1E-8_downsampled_try3_peak_1001	687	24.1915	68.7554	65.6847	139
chr1	72299004	72299196	Project004-IPSHOCH-Exp5-ChIP-ES-CTCF-IP-Blobel-Rep2-S1_S2_MACS2_rendition_1E-8_downsampled_try3_peak_1002	222	10.1804	22.2776	19.7851	95
chr1	72353067	72353747	Project004-IPSHOCH-Exp5-ChIP-ES-CTCF-IP-Blobel-Rep2-S1_S2_MACS2_rendition_1E-8_downsampled_try3_peak_1003	625	21.1396	62.5341	59.5373	545
chr1	72360086	72360645	Project004-IPSHOCH-Exp5-ChIP-ES-CTCF-IP-Blobel-Rep2-S1_S2_MACS2_rendition_1E-8_downsampled_try3_peak_1004	875	19.0714	87.5719	84.255	314
chr1	72427221	72427441	Project004-IPSHOCH-Exp5-ChIP-ES-CTCF-IP-Blobel-Rep2-S1_S2_MACS2_rendition_1E-8_downsampled_try3_peak_1005	165	8.63981	16.5515	14.1528	65
chr1	72621773	72622070	Project004-IPSHOCH-Exp5-ChIP-ES-CTCF-IP-Blobel-Rep2-S1_S2_MACS2_rendition_1E-8_downsampled_try3_peak_1006	351	12.5	35.1463	32.4769	129
chr1	72657048	72657347	Project004-IPSHOCH-Exp5-ChIP-ES-CTCF-IP-Blobel-Rep2-S1_S2_MACS2_rendition_1E-8_downsampled_try3_peak_1007	362	16.2583	36.2766	33.6007	182
chr1	72748453	72748742	Project004-IPSHOCH-Exp5-ChIP-ES-CTCF-IP-Blobel-Rep2-S1_S2_MACS2_rendition_1E-8_downsampled_try3_peak_1008	645	22.2973	64.5809	61.5577	137
chr1	72763481	72763917	Project004-IPSHOCH-Exp5-ChIP-ES-CTCF-IP-Blobel-Rep2-S1_S2_MACS2_rendition_1E-8_downsampled_try3_peak_1009	1089	22.2857	108.906	105.299	247
chr1	72765358	72765817	Project004-IPSHOCH-Exp5-ChIP-ES-CTCF-IP-Blobel-Rep2-S1_S2_MACS2_rendition_1E-8_downsampled_try3_peak_1010	1380	33.75	138.087	134.046	238
chr1	72901424	72901906	Project004-IPSHOCH-Exp5-ChIP-ES-CTCF-IP-Blobel-Rep2-S1_S2_MACS2_rendition_1E-8_downsampled_try3_peak_1011	1988	52.7027	198.82	193.907	283
chr1	72912388	72912837	Project004-IPSHOCH-Exp5-ChIP-ES-CTCF-IP-Blobel-Rep2-S1_S2_MACS2_rendition_1E-8_downsampled_try3_peak_1012	1790	51.8195	179.091	174.437	194
chr1	72924452	72924775	Project004-IPSHOCH-Exp5-ChIP-ES-CTCF-IP-Blobel-Rep2-S1_S2_MACS2_rendition_1E-8_downsampled_try3_peak_1013	835	25.8092	83.52	80.2569	145
chr1	72925875	72926238	Project004-IPSHOCH-Exp5-ChIP-ES-CTCF-IP-Blobel-Rep2-S1_S2_MACS2_rendition_1E-8_downsampled_try3_peak_1014	923	30.2393	92.3196	88.9479	160
chr1	73321166	73321403	Project004-IPSHOCH-Exp5-ChIP-ES-CTCF-IP-Blobel-Rep2-S1_S2_MACS2_rendition_1E-8_downsampled_try3_peak_1015	320	13.3784	32.0676	29.4379	87
chr1	73349902	73350091	Project004-IPSHOCH-Exp5-ChIP-ES-CTCF-IP-Blobel-Rep2-S1_S2_MACS2_rendition_1E-8_downsampled_try3_peak_1016	165	9.18919	16.529	14.131	105
chr1	73665173	73665405	Project004-IPSHOCH-Exp5-ChIP-ES-CTCF-IP-Blobel-Rep2-S1_S2_MACS2_rendition_1E-8_downsampled_try3_peak_1017	320	13.3784	32.0676	29.4379	127
chr1	73872911	73873247	Project004-IPSHOCH-Exp5-ChIP-ES-CTCF-IP-Blobel-Rep2-S1_S2_MACS2_rendition_1E-8_downsampled_try3_peak_1018	1072	24.8139	107.29	103.709	156
chr1	73909400	73909962	Project004-IPSHOCH-Exp5-ChIP-ES-CTCF-IP-Blobel-Rep2-S1_S2_MACS2_rendition_1E-8_downsampled_try3_peak_1019	791	25.4509	79.1377	75.9325	156
chr1	73948139	73948643	Project004-IPSHOCH-Exp5-ChIP-ES-CTCF-IP-Blobel-Rep2-S1_S2_MACS2_rendition_1E-8_downsampled_try3_peak_1020	1289	32.3645	128.967	125.064	184
chr1	73948933	73949320	Project004-IPSHOCH-Exp5-ChIP-ES-CTCF-IP-Blobel-Rep2-S1_S2_MACS2_rendition_1E-8_downsampled_try3_peak_1021	846	23.4375	84.6556	81.3789	149
chr1	73952320	73952534	Project004-IPSHOCH-Exp5-ChIP-ES-CTCF-IP-Blobel-Rep2-S1_S2_MACS2_rendition_1E-8_downsampled_try3_peak_1022	202	9.93578	20.2248	17.7696	82
chr1	73972853	73973171	Project004-IPSHOCH-Exp5-ChIP-ES-CTCF-IP-Blobel-Rep2-S1_S2_MACS2_rendition_1E-8_downsampled_try3_peak_1023	798	29.6096	79.8396	76.6257	158
chr1	74013162	74013348	Project004-IPSHOCH-Exp5-ChIP-ES-CTCF-IP-Blobel-Rep2-S1_S2_MACS2_rendition_1E-8_downsampled_try3_peak_1024	144	8.18961	14.4522	12.0973	67
chr1	74033279	74033599	Project004-IPSHOCH-Exp5-ChIP-ES-CTCF-IP-Blobel-Rep2-S1_S2_MACS2_rendition_1E-8_downsampled_try3_peak_1025	1127	38.6136	112.756	109.097	179
chr1	74042875	74043321	Project004-IPSHOCH-Exp5-ChIP-ES-CTCF-IP-Blobel-Rep2-S1_S2_MACS2_rendition_1E-8_downsampled_try3_peak_1026	1336	43.3928	133.655	129.68	163
chr1	74123870	74124279	Project004-IPSHOCH-Exp5-ChIP-ES-CTCF-IP-Blobel-Rep2-S1_S2_MACS2_rendition_1E-8_downsampled_try3_peak_1027	1092	37.7778	109.282	105.669	255
chr1	74129271	74129886	Project004-IPSHOCH-Exp5-ChIP-ES-CTCF-IP-Blobel-Rep2-S1_S2_MACS2_rendition_1E-8_downsampled_try3_peak_1028	1815	41.5625	181.578	176.885	361
chr1	74144888	74145204	Project004-IPSHOCH-Exp5-ChIP-ES-CTCF-IP-Blobel-Rep2-S1_S2_MACS2_rendition_1E-8_downsampled_try3_peak_1029	338	12.1875	33.886	31.2347	138
chr1	74171653	74172143	Project004-IPSHOCH-Exp5-ChIP-ES-CTCF-IP-Blobel-Rep2-S1_S2_MACS2_rendition_1E-8_downsampled_try3_peak_1030	1345	37.0306	134.551	130.562	232
chr1	74177861	74178124	Project004-IPSHOCH-Exp5-ChIP-ES-CTCF-IP-Blobel-Rep2-S1_S2_MACS2_rendition_1E-8_downsampled_try3_peak_1031	364	15.1197	36.4083	33.724	142
chr1	74178665	74178869	Project004-IPSHOCH-Exp5-ChIP-ES-CTCF-IP-Blobel-Rep2-S1_S2_MACS2_rendition_1E-8_downsampled_try3_peak_1032	241	10.9459	24.1597	21.6411	88
chr1	74185954	74186439	Project004-IPSHOCH-Exp5-ChIP-ES-CTCF-IP-Blobel-Rep2-S1_S2_MACS2_rendition_1E-8_downsampled_try3_peak_1033	1302	41.4388	130.296	126.374	264
chr1	74229609	74229886	Project004-IPSHOCH-Exp5-ChIP-ES-CTCF-IP-Blobel-Rep2-S1_S2_MACS2_rendition_1E-8_downsampled_try3_peak_1034	227	8.38983	22.7506	20.2555	134
chr1	74242546	74242934	Project004-IPSHOCH-Exp5-ChIP-ES-CTCF-IP-Blobel-Rep2-S1_S2_MACS2_rendition_1E-8_downsampled_try3_peak_1035	987	26.25	98.7009	95.2358	202
chr1	74250136	74250414	Project004-IPSHOCH-Exp5-ChIP-ES-CTCF-IP-Blobel-Rep2-S1_S2_MACS2_rendition_1E-8_downsampled_try3_peak_1036	256	10.1536	25.677	23.1374	152
chr1	74252262	74252835	Project004-IPSHOCH-Exp5-ChIP-ES-CTCF-IP-Blobel-Rep2-S1_S2_MACS2_rendition_1E-8_downsampled_try3_peak_1037	1330	36.8212	133.079	129.108	296
chr1	74315428	74315753	Project004-IPSHOCH-Exp5-ChIP-ES-CTCF-IP-Blobel-Rep2-S1_S2_MACS2_rendition_1E-8_downsampled_try3_peak_1038	477	17.8378	47.7286	44.9083	124
chr1	74333707	74334182	Project004-IPSHOCH-Exp5-ChIP-ES-CTCF-IP-Blobel-Rep2-S1_S2_MACS2_rendition_1E-8_downsampled_try3_peak_1039	1534	36.5625	153.483	149.203	234
chr1	74359737	74360256	Project004-IPSHOCH-Exp5-ChIP-ES-CTCF-IP-Blobel-Rep2-S1_S2_MACS2_rendition_1E-8_downsampled_try3_peak_1040	1189	36.7192	118.909	115.15	348
chr1	74373499	74373959	Project004-IPSHOCH-Exp5-ChIP-ES-CTCF-IP-Blobel-Rep2-S1_S2_MACS2_rendition_1E-8_downsampled_try3_peak_1041	644	22.7403	64.4872	61.4694	232
chr1	74408428	74408788	Project004-IPSHOCH-Exp5-ChIP-ES-CTCF-IP-Blobel-Rep2-S1_S2_MACS2_rendition_1E-8_downsampled_try3_peak_1042	962	16.0194	96.2021	92.7672	155
chr1	74424296	74424538	Project004-IPSHOCH-Exp5-ChIP-ES-CTCF-IP-Blobel-Rep2-S1_S2_MACS2_rendition_1E-8_downsampled_try3_peak_1043	160	8.60785	16.0281	13.6432	146
chr1	74433163	74433547	Project004-IPSHOCH-Exp5-ChIP-ES-CTCF-IP-Blobel-Rep2-S1_S2_MACS2_rendition_1E-8_downsampled_try3_peak_1044	628	19.4587	62.8412	59.8434	188
chr1	74437098	74437942	Project004-IPSHOCH-Exp5-ChIP-ES-CTCF-IP-Blobel-Rep2-S1_S2_MACS2_rendition_1E-8_downsampled_try3_peak_1045	1410	37.5574	141.008	136.923	223
chr1	74443949	74444299	Project004-IPSHOCH-Exp5-ChIP-ES-CTCF-IP-Blobel-Rep2-S1_S2_MACS2_rendition_1E-8_downsampled_try3_peak_1046	831	23.125	83.1228	79.8667	144
chr1	74444754	74445120	Project004-IPSHOCH-Exp5-ChIP-ES-CTCF-IP-Blobel-Rep2-S1_S2_MACS2_rendition_1E-8_downsampled_try3_peak_1047	1084	32.5646	108.462	104.858	213
chr1	74488440	74488719	Project004-IPSHOCH-Exp5-ChIP-ES-CTCF-IP-Blobel-Rep2-S1_S2_MACS2_rendition_1E-8_downsampled_try3_peak_1048	186	8.125	18.6213	16.1896	144
chr1	74488878	74489074	Project004-IPSHOCH-Exp5-ChIP-ES-CTCF-IP-Blobel-Rep2-S1_S2_MACS2_rendition_1E-8_downsampled_try3_peak_1049	168	8.51351	16.8225	14.4184	119
chr1	74499261	74499638	Project004-IPSHOCH-Exp5-ChIP-ES-CTCF-IP-Blobel-Rep2-S1_S2_MACS2_rendition_1E-8_downsampled_try3_peak_1050	484	12.6429	48.4151	45.5887	207
chr1	74502890	74503102	Project004-IPSHOCH-Exp5-ChIP-ES-CTCF-IP-Blobel-Rep2-S1_S2_MACS2_rendition_1E-8_downsampled_try3_peak_1051	212	10.5341	21.2227	18.7486	106
chr1	74506864	74507220	Project004-IPSHOCH-Exp5-ChIP-ES-CTCF-IP-Blobel-Rep2-S1_S2_MACS2_rendition_1E-8_downsampled_try3_peak_1052	740	21.25	74.0511	70.9146	138
chr1	74650444	74650906	Project004-IPSHOCH-Exp5-ChIP-ES-CTCF-IP-Blobel-Rep2-S1_S2_MACS2_rendition_1E-8_downsampled_try3_peak_1053	273	11.7466	27.3333	24.7724	156
chr1	74690371	74690819	Project004-IPSHOCH-Exp5-ChIP-ES-CTCF-IP-Blobel-Rep2-S1_S2_MACS2_rendition_1E-8_downsampled_try3_peak_1054	313	11.5625	31.3987	28.7817	282
chr1	74708214	74708472	Project004-IPSHOCH-Exp5-ChIP-ES-CTCF-IP-Blobel-Rep2-S1_S2_MACS2_rendition_1E-8_downsampled_try3_peak_1055	630	18.2855	63.0512	60.0481	102
chr1	74721163	74721387	Project004-IPSHOCH-Exp5-ChIP-ES-CTCF-IP-Blobel-Rep2-S1_S2_MACS2_rendition_1E-8_downsampled_try3_peak_1056	251	10.8473	25.1635	22.6308	151
chr1	74759671	74759913	Project004-IPSHOCH-Exp5-ChIP-ES-CTCF-IP-Blobel-Rep2-S1_S2_MACS2_rendition_1E-8_downsampled_try3_peak_1057	179	6.64286	17.9624	15.5407	120
chr1	74770223	74770962	Project004-IPSHOCH-Exp5-ChIP-ES-CTCF-IP-Blobel-Rep2-S1_S2_MACS2_rendition_1E-8_downsampled_try3_peak_1058	614	21.4865	61.4404	58.4569	243
chr1	74774224	74774450	Project004-IPSHOCH-Exp5-ChIP-ES-CTCF-IP-Blobel-Rep2-S1_S2_MACS2_rendition_1E-8_downsampled_try3_peak_1059	220	11.0166	22.0246	19.5341	102
chr1	74795294	74795950	Project004-IPSHOCH-Exp5-ChIP-ES-CTCF-IP-Blobel-Rep2-S1_S2_MACS2_rendition_1E-8_downsampled_try3_peak_1060	1423	30.2542	142.393	138.282	290
chr1	74803408	74803668	Project004-IPSHOCH-Exp5-ChIP-ES-CTCF-IP-Blobel-Rep2-S1_S2_MACS2_rendition_1E-8_downsampled_try3_peak_1061	178	9.6997	17.8272	15.4061	114
chr1	74806303	74806793	Project004-IPSHOCH-Exp5-ChIP-ES-CTCF-IP-Blobel-Rep2-S1_S2_MACS2_rendition_1E-8_downsampled_try3_peak_1062	1561	50.03	156.176	151.854	295
chr1	74809672	74810063	Project004-IPSHOCH-Exp5-ChIP-ES-CTCF-IP-Blobel-Rep2-S1_S2_MACS2_rendition_1E-8_downsampled_try3_peak_1063	1114	33.6487	111.42	107.771	160
chr1	74813685	74813943	Project004-IPSHOCH-Exp5-ChIP-ES-CTCF-IP-Blobel-Rep2-S1_S2_MACS2_rendition_1E-8_downsampled_try3_peak_1064	213	10.9125	21.3205	18.846	144
chr1	74822388	74822945	Project004-IPSHOCH-Exp5-ChIP-ES-CTCF-IP-Blobel-Rep2-S1_S2_MACS2_rendition_1E-8_downsampled_try3_peak_1065	583	14.3571	58.3241	55.382	225
chr1	74830745	74831496	Project004-IPSHOCH-Exp5-ChIP-ES-CTCF-IP-Blobel-Rep2-S1_S2_MACS2_rendition_1E-8_downsampled_try3_peak_1066	1693	47.5863	169.325	164.806	498
chr1	74834443	74834813	Project004-IPSHOCH-Exp5-ChIP-ES-CTCF-IP-Blobel-Rep2-S1_S2_MACS2_rendition_1E-8_downsampled_try3_peak_1067	1239	34.7863	123.986	120.158	153
chr1	74849561	74850031	Project004-IPSHOCH-Exp5-ChIP-ES-CTCF-IP-Blobel-Rep2-S1_S2_MACS2_rendition_1E-8_downsampled_try3_peak_1068	776	20.0039	77.6313	74.4472	193
chr1	74852868	74853204	Project004-IPSHOCH-Exp5-ChIP-ES-CTCF-IP-Blobel-Rep2-S1_S2_MACS2_rendition_1E-8_downsampled_try3_peak_1069	571	17.7688	57.135	54.205	131
chr1	74854563	74855285	Project004-IPSHOCH-Exp5-ChIP-ES-CTCF-IP-Blobel-Rep2-S1_S2_MACS2_rendition_1E-8_downsampled_try3_peak_1070	1680	48.1998	168.051	163.558	320
chr1	74855604	74855921	Project004-IPSHOCH-Exp5-ChIP-ES-CTCF-IP-Blobel-Rep2-S1_S2_MACS2_rendition_1E-8_downsampled_try3_peak_1071	752	23.2725	75.2003	72.0492	156
chr1	74860666	74860956	Project004-IPSHOCH-Exp5-ChIP-ES-CTCF-IP-Blobel-Rep2-S1_S2_MACS2_rendition_1E-8_downsampled_try3_peak_1072	310	13.1449	31.0104	28.3969	143
chr1	74861567	74861877	Project004-IPSHOCH-Exp5-ChIP-ES-CTCF-IP-Blobel-Rep2-S1_S2_MACS2_rendition_1E-8_downsampled_try3_peak_1073	307	12.973	30.7148	28.1028	126
chr1	74870259	74870543	Project004-IPSHOCH-Exp5-ChIP-ES-CTCF-IP-Blobel-Rep2-S1_S2_MACS2_rendition_1E-8_downsampled_try3_peak_1074	413	16.3413	41.3605	38.6182	124
chr1	74908435	74908726	Project004-IPSHOCH-Exp5-ChIP-ES-CTCF-IP-Blobel-Rep2-S1_S2_MACS2_rendition_1E-8_downsampled_try3_peak_1075	958	30	95.8394	92.4129	160
chr1	74927285	74927716	Project004-IPSHOCH-Exp5-ChIP-ES-CTCF-IP-Blobel-Rep2-S1_S2_MACS2_rendition_1E-8_downsampled_try3_peak_1076	1363	33.4375	136.396	132.376	252
chr1	74939863	74940570	Project004-IPSHOCH-Exp5-ChIP-ES-CTCF-IP-Blobel-Rep2-S1_S2_MACS2_rendition_1E-8_downsampled_try3_peak_1077	1611	49.6194	161.19	156.794	365
chr1	74941409	74941859	Project004-IPSHOCH-Exp5-ChIP-ES-CTCF-IP-Blobel-Rep2-S1_S2_MACS2_rendition_1E-8_downsampled_try3_peak_1078	1413	45.9556	141.343	137.253	265
chr1	74948170	74948647	Project004-IPSHOCH-Exp5-ChIP-ES-CTCF-IP-Blobel-Rep2-S1_S2_MACS2_rendition_1E-8_downsampled_try3_peak_1079	924	25	92.4044	89.0288	291
chr1	74962367	74962694	Project004-IPSHOCH-Exp5-ChIP-ES-CTCF-IP-Blobel-Rep2-S1_S2_MACS2_rendition_1E-8_downsampled_try3_peak_1080	462	17.4324	46.2512	43.4487	170
chr1	74971148	74971354	Project004-IPSHOCH-Exp5-ChIP-ES-CTCF-IP-Blobel-Rep2-S1_S2_MACS2_rendition_1E-8_downsampled_try3_peak_1081	246	12.2523	24.6304	22.1021	101
chr1	74973313	74973684	Project004-IPSHOCH-Exp5-ChIP-ES-CTCF-IP-Blobel-Rep2-S1_S2_MACS2_rendition_1E-8_downsampled_try3_peak_1082	857	27.5676	85.7116	82.4188	161
chr1	74995314	74995741	Project004-IPSHOCH-Exp5-ChIP-ES-CTCF-IP-Blobel-Rep2-S1_S2_MACS2_rendition_1E-8_downsampled_try3_peak_1083	1347	33.125	134.709	130.711	260
chr1	75000840	75001099	Project004-IPSHOCH-Exp5-ChIP-ES-CTCF-IP-Blobel-Rep2-S1_S2_MACS2_rendition_1E-8_downsampled_try3_peak_1084	351	14.3773	35.1361	32.4687	109
chr1	75011035	75011451	Project004-IPSHOCH-Exp5-ChIP-ES-CTCF-IP-Blobel-Rep2-S1_S2_MACS2_rendition_1E-8_downsampled_try3_peak_1085	1357	33.6337	135.712	131.708	192
chr1	75020264	75020485	Project004-IPSHOCH-Exp5-ChIP-ES-CTCF-IP-Blobel-Rep2-S1_S2_MACS2_rendition_1E-8_downsampled_try3_peak_1086	232	11.4302	23.2601	20.7506	96
chr1	75046954	75047491	Project004-IPSHOCH-Exp5-ChIP-ES-CTCF-IP-Blobel-Rep2-S1_S2_MACS2_rendition_1E-8_downsampled_try3_peak_1087	1431	34.6875	143.184	139.063	301
chr1	75063402	75064128	Project004-IPSHOCH-Exp5-ChIP-ES-CTCF-IP-Blobel-Rep2-S1_S2_MACS2_rendition_1E-8_downsampled_try3_peak_1088	1296	32.1875	129.672	125.757	234
chr1	75098680	75099067	Project004-IPSHOCH-Exp5-ChIP-ES-CTCF-IP-Blobel-Rep2-S1_S2_MACS2_rendition_1E-8_downsampled_try3_peak_1089	1017	31.63	101.713	98.2104	192
chr1	75118871	75119263	Project004-IPSHOCH-Exp5-ChIP-ES-CTCF-IP-Blobel-Rep2-S1_S2_MACS2_rendition_1E-8_downsampled_try3_peak_1090	320	13.3784	32.0676	29.4379	142
chr1	75121000	75121450	Project004-IPSHOCH-Exp5-ChIP-ES-CTCF-IP-Blobel-Rep2-S1_S2_MACS2_rendition_1E-8_downsampled_try3_peak_1091	1044	32.027	104.44	100.893	231
chr1	75139201	75139658	Project004-IPSHOCH-Exp5-ChIP-ES-CTCF-IP-Blobel-Rep2-S1_S2_MACS2_rendition_1E-8_downsampled_try3_peak_1092	870	21.1017	87.0636	83.7552	159
chr1	75153180	75153346	Project004-IPSHOCH-Exp5-ChIP-ES-CTCF-IP-Blobel-Rep2-S1_S2_MACS2_rendition_1E-8_downsampled_try3_peak_1093	112	6.48649	11.2573	8.9767	9
chr1	75157672	75157953	Project004-IPSHOCH-Exp5-ChIP-ES-CTCF-IP-Blobel-Rep2-S1_S2_MACS2_rendition_1E-8_downsampled_try3_peak_1094	204	10.6695	20.4039	17.9477	130
chr1	75160190	75160493	Project004-IPSHOCH-Exp5-ChIP-ES-CTCF-IP-Blobel-Rep2-S1_S2_MACS2_rendition_1E-8_downsampled_try3_peak_1095	534	21.1967	53.4851	50.6014	162
chr1	75178824	75179076	Project004-IPSHOCH-Exp5-ChIP-ES-CTCF-IP-Blobel-Rep2-S1_S2_MACS2_rendition_1E-8_downsampled_try3_peak_1096	186	7.37288	18.6225	16.19	143
chr1	75216256	75216486	Project004-IPSHOCH-Exp5-ChIP-ES-CTCF-IP-Blobel-Rep2-S1_S2_MACS2_rendition_1E-8_downsampled_try3_peak_1097	227	8.38983	22.7506	20.2555	94
chr1	75229046	75229508	Project004-IPSHOCH-Exp5-ChIP-ES-CTCF-IP-Blobel-Rep2-S1_S2_MACS2_rendition_1E-8_downsampled_try3_peak_1098	686	23.1433	68.6982	65.6283	226
chr1	75231271	75231587	Project004-IPSHOCH-Exp5-ChIP-ES-CTCF-IP-Blobel-Rep2-S1_S2_MACS2_rendition_1E-8_downsampled_try3_peak_1099	524	16.5625	52.4199	49.5431	155
chr1	75248195	75248612	Project004-IPSHOCH-Exp5-ChIP-ES-CTCF-IP-Blobel-Rep2-S1_S2_MACS2_rendition_1E-8_downsampled_try3_peak_1100	1692	38.8245	169.215	164.696	174
chr1	75249574	75249918	Project004-IPSHOCH-Exp5-ChIP-ES-CTCF-IP-Blobel-Rep2-S1_S2_MACS2_rendition_1E-8_downsampled_try3_peak_1101	743	26.4197	74.387	71.2433	177
chr1	75250758	75251259	Project004-IPSHOCH-Exp5-ChIP-ES-CTCF-IP-Blobel-Rep2-S1_S2_MACS2_rendition_1E-8_downsampled_try3_peak_1102	1197	30.3125	119.714	115.948	239
chr1	75287157	75287570	Project004-IPSHOCH-Exp5-ChIP-ES-CTCF-IP-Blobel-Rep2-S1_S2_MACS2_rendition_1E-8_downsampled_try3_peak_1103	1142	38.8855	114.252	110.568	241
chr1	75291436	75291722	Project004-IPSHOCH-Exp5-ChIP-ES-CTCF-IP-Blobel-Rep2-S1_S2_MACS2_rendition_1E-8_downsampled_try3_peak_1104	293	12.5676	29.3754	26.781	118
chr1	75313613	75313776	Project004-IPSHOCH-Exp5-ChIP-ES-CTCF-IP-Blobel-Rep2-S1_S2_MACS2_rendition_1E-8_downsampled_try3_peak_1105	156	6.61017	15.6784	13.2953	81
chr1	75314427	75314819	Project004-IPSHOCH-Exp5-ChIP-ES-CTCF-IP-Blobel-Rep2-S1_S2_MACS2_rendition_1E-8_downsampled_try3_peak_1106	895	26.4948	89.5228	86.1803	231
chr1	75319983	75320168	Project004-IPSHOCH-Exp5-ChIP-ES-CTCF-IP-Blobel-Rep2-S1_S2_MACS2_rendition_1E-8_downsampled_try3_peak_1107	179	8.91892	17.9999	15.5739	91
chr1	75324101	75324355	Project004-IPSHOCH-Exp5-ChIP-ES-CTCF-IP-Blobel-Rep2-S1_S2_MACS2_rendition_1E-8_downsampled_try3_peak_1108	437	16.8419	43.7088	40.9406	134
chr1	75339412	75339848	Project004-IPSHOCH-Exp5-ChIP-ES-CTCF-IP-Blobel-Rep2-S1_S2_MACS2_rendition_1E-8_downsampled_try3_peak_1109	1602	48.428	160.291	155.911	234
chr1	75360087	75360398	Project004-IPSHOCH-Exp5-ChIP-ES-CTCF-IP-Blobel-Rep2-S1_S2_MACS2_rendition_1E-8_downsampled_try3_peak_1110	290	13.4888	29.0465	26.4576	170
chr1	75367995	75368376	Project004-IPSHOCH-Exp5-ChIP-ES-CTCF-IP-Blobel-Rep2-S1_S2_MACS2_rendition_1E-8_downsampled_try3_peak_1111	1093	20.3704	109.314	105.702	181
chr1	75386902	75387107	Project004-IPSHOCH-Exp5-ChIP-ES-CTCF-IP-Blobel-Rep2-S1_S2_MACS2_rendition_1E-8_downsampled_try3_peak_1112	156	8.10811	15.6651	13.2839	95
chr1	75395284	75395677	Project004-IPSHOCH-Exp5-ChIP-ES-CTCF-IP-Blobel-Rep2-S1_S2_MACS2_rendition_1E-8_downsampled_try3_peak_1113	779	17.5714	77.9796	74.7934	173
chr1	75410331	75410743	Project004-IPSHOCH-Exp5-ChIP-ES-CTCF-IP-Blobel-Rep2-S1_S2_MACS2_rendition_1E-8_downsampled_try3_peak_1114	1879	49.3357	187.924	183.148	176
chr1	75422245	75422945	Project004-IPSHOCH-Exp5-ChIP-ES-CTCF-IP-Blobel-Rep2-S1_S2_MACS2_rendition_1E-8_downsampled_try3_peak_1115	1656	38.75	165.665	161.202	315
chr1	75431751	75432009	Project004-IPSHOCH-Exp5-ChIP-ES-CTCF-IP-Blobel-Rep2-S1_S2_MACS2_rendition_1E-8_downsampled_try3_peak_1116	345	15.2402	34.5622	31.9077	129
chr1	75442257	75442709	Project004-IPSHOCH-Exp5-ChIP-ES-CTCF-IP-Blobel-Rep2-S1_S2_MACS2_rendition_1E-8_downsampled_try3_peak_1117	1347	33.125	134.709	130.711	215
chr1	75453272	75453951	Project004-IPSHOCH-Exp5-ChIP-ES-CTCF-IP-Blobel-Rep2-S1_S2_MACS2_rendition_1E-8_downsampled_try3_peak_1118	1847	57.1772	184.753	180.02	196
chr1	75464119	75464618	Project004-IPSHOCH-Exp5-ChIP-ES-CTCF-IP-Blobel-Rep2-S1_S2_MACS2_rendition_1E-8_downsampled_try3_peak_1119	1269	36.4144	126.928	123.053	282
chr1	75473689	75474394	Project004-IPSHOCH-Exp5-ChIP-ES-CTCF-IP-Blobel-Rep2-S1_S2_MACS2_rendition_1E-8_downsampled_try3_peak_1120	2066	54.3243	206.643	201.634	317
chr1	75484606	75484806	Project004-IPSHOCH-Exp5-ChIP-ES-CTCF-IP-Blobel-Rep2-S1_S2_MACS2_rendition_1E-8_downsampled_try3_peak_1121	277	10.3224	27.7745	25.2039	121
chr1	75491655	75492155	Project004-IPSHOCH-Exp5-ChIP-ES-CTCF-IP-Blobel-Rep2-S1_S2_MACS2_rendition_1E-8_downsampled_try3_peak_1122	1363	33.4375	136.396	132.376	298
chr1	75496066	75496354	Project004-IPSHOCH-Exp5-ChIP-ES-CTCF-IP-Blobel-Rep2-S1_S2_MACS2_rendition_1E-8_downsampled_try3_peak_1123	584	18.8839	58.4307	55.4839	142
chr1	75543171	75543504	Project004-IPSHOCH-Exp5-ChIP-ES-CTCF-IP-Blobel-Rep2-S1_S2_MACS2_rendition_1E-8_downsampled_try3_peak_1124	661	21.6947	66.1157	63.0766	210
chr1	75556036	75556580	Project004-IPSHOCH-Exp5-ChIP-ES-CTCF-IP-Blobel-Rep2-S1_S2_MACS2_rendition_1E-8_downsampled_try3_peak_1125	2251	42.7119	225.152	219.931	241
chr1	75563238	75563519	Project004-IPSHOCH-Exp5-ChIP-ES-CTCF-IP-Blobel-Rep2-S1_S2_MACS2_rendition_1E-8_downsampled_try3_peak_1126	206	9.85869	20.63	18.1623	144
chr1	75594207	75594607	Project004-IPSHOCH-Exp5-ChIP-ES-CTCF-IP-Blobel-Rep2-S1_S2_MACS2_rendition_1E-8_downsampled_try3_peak_1127	892	24.375	89.2882	85.9475	213
chr1	75649108	75649427	Project004-IPSHOCH-Exp5-ChIP-ES-CTCF-IP-Blobel-Rep2-S1_S2_MACS2_rendition_1E-8_downsampled_try3_peak_1128	492	18.2432	49.2158	46.3778	158
chr1	75650160	75650559	Project004-IPSHOCH-Exp5-ChIP-ES-CTCF-IP-Blobel-Rep2-S1_S2_MACS2_rendition_1E-8_downsampled_try3_peak_1129	1825	49.7042	182.569	177.867	162
chr1	75678514	75678820	Project004-IPSHOCH-Exp5-ChIP-ES-CTCF-IP-Blobel-Rep2-S1_S2_MACS2_rendition_1E-8_downsampled_try3_peak_1130	583	22.6419	58.3787	55.432	145
chr1	75738271	75738542	Project004-IPSHOCH-Exp5-ChIP-ES-CTCF-IP-Blobel-Rep2-S1_S2_MACS2_rendition_1E-8_downsampled_try3_peak_1131	362	14.5946	36.202	33.5264	137
chr1	75808793	75808967	Project004-IPSHOCH-Exp5-ChIP-ES-CTCF-IP-Blobel-Rep2-S1_S2_MACS2_rendition_1E-8_downsampled_try3_peak_1132	168	8.51351	16.8225	14.4184	118
chr1	75812972	75813258	Project004-IPSHOCH-Exp5-ChIP-ES-CTCF-IP-Blobel-Rep2-S1_S2_MACS2_rendition_1E-8_downsampled_try3_peak_1133	140	8.16817	14.0041	11.6555	51
chr1	75815611	75815835	Project004-IPSHOCH-Exp5-ChIP-ES-CTCF-IP-Blobel-Rep2-S1_S2_MACS2_rendition_1E-8_downsampled_try3_peak_1134	218	11.2312	21.8505	19.3628	82
chr1	75922349	75922730	Project004-IPSHOCH-Exp5-ChIP-ES-CTCF-IP-Blobel-Rep2-S1_S2_MACS2_rendition_1E-8_downsampled_try3_peak_1135	1213	30.625	121.363	117.572	161
chr1	75952354	75952704	Project004-IPSHOCH-Exp5-ChIP-ES-CTCF-IP-Blobel-Rep2-S1_S2_MACS2_rendition_1E-8_downsampled_try3_peak_1136	119	6.91185	11.9548	9.65538	257
chr1	75993863	75994119	Project004-IPSHOCH-Exp5-ChIP-ES-CTCF-IP-Blobel-Rep2-S1_S2_MACS2_rendition_1E-8_downsampled_try3_peak_1137	442	18.8889	44.2197	41.4423	117
chr1	76842135	76842345	Project004-IPSHOCH-Exp5-ChIP-ES-CTCF-IP-Blobel-Rep2-S1_S2_MACS2_rendition_1E-8_downsampled_try3_peak_1138	260	12.7628	26.0473	23.4987	133
chr1	77078253	77078565	Project004-IPSHOCH-Exp5-ChIP-ES-CTCF-IP-Blobel-Rep2-S1_S2_MACS2_rendition_1E-8_downsampled_try3_peak_1139	394	17.3574	39.4954	36.7734	180
chr1	77493288	77493498	Project004-IPSHOCH-Exp5-ChIP-ES-CTCF-IP-Blobel-Rep2-S1_S2_MACS2_rendition_1E-8_downsampled_try3_peak_1140	175	7.8125	17.5473	15.1358	74
chr1	77512760	77513283	Project004-IPSHOCH-Exp5-ChIP-ES-CTCF-IP-Blobel-Rep2-S1_S2_MACS2_rendition_1E-8_downsampled_try3_peak_1141	1363	33.4375	136.396	132.376	253
chr1	77558386	77558710	Project004-IPSHOCH-Exp5-ChIP-ES-CTCF-IP-Blobel-Rep2-S1_S2_MACS2_rendition_1E-8_downsampled_try3_peak_1142	552	19.8649	55.2579	52.3488	174
chr1	77586047	77586420	Project004-IPSHOCH-Exp5-ChIP-ES-CTCF-IP-Blobel-Rep2-S1_S2_MACS2_rendition_1E-8_downsampled_try3_peak_1143	566	17.5	56.6146	53.6917	152
chr1	77688088	77688291	Project004-IPSHOCH-Exp5-ChIP-ES-CTCF-IP-Blobel-Rep2-S1_S2_MACS2_rendition_1E-8_downsampled_try3_peak_1144	204	9.72973	20.4115	17.9517	82
chr1	77801778	77802079	Project004-IPSHOCH-Exp5-ChIP-ES-CTCF-IP-Blobel-Rep2-S1_S2_MACS2_rendition_1E-8_downsampled_try3_peak_1145	216	10.1351	21.6442	19.1647	145
chr1	77892862	77893085	Project004-IPSHOCH-Exp5-ChIP-ES-CTCF-IP-Blobel-Rep2-S1_S2_MACS2_rendition_1E-8_downsampled_try3_peak_1146	280	12.1622	28.0497	25.4743	131
chr1	77927267	77927587	Project004-IPSHOCH-Exp5-ChIP-ES-CTCF-IP-Blobel-Rep2-S1_S2_MACS2_rendition_1E-8_downsampled_try3_peak_1147	784	19.5763	78.4324	75.2379	176
chr1	77939677	77940112	Project004-IPSHOCH-Exp5-ChIP-ES-CTCF-IP-Blobel-Rep2-S1_S2_MACS2_rendition_1E-8_downsampled_try3_peak_1148	1226	41.3513	122.654	118.842	192
chr1	77968880	77969494	Project004-IPSHOCH-Exp5-ChIP-ES-CTCF-IP-Blobel-Rep2-S1_S2_MACS2_rendition_1E-8_downsampled_try3_peak_1149	1186	26.4407	118.669	114.919	253
chr1	77975258	77975691	Project004-IPSHOCH-Exp5-ChIP-ES-CTCF-IP-Blobel-Rep2-S1_S2_MACS2_rendition_1E-8_downsampled_try3_peak_1150	1274	37.2973	127.422	123.541	184
chr1	78005354	78005695	Project004-IPSHOCH-Exp5-ChIP-ES-CTCF-IP-Blobel-Rep2-S1_S2_MACS2_rendition_1E-8_downsampled_try3_peak_1151	812	20.0847	81.2878	78.0573	160
chr1	78033328	78033552	Project004-IPSHOCH-Exp5-ChIP-ES-CTCF-IP-Blobel-Rep2-S1_S2_MACS2_rendition_1E-8_downsampled_try3_peak_1152	228	10.5405	22.8938	20.394	117
chr1	78227430	78227603	Project004-IPSHOCH-Exp5-ChIP-ES-CTCF-IP-Blobel-Rep2-S1_S2_MACS2_rendition_1E-8_downsampled_try3_peak_1153	144	6.875	14.4294	12.0758	75
chr1	78264144	78264408	Project004-IPSHOCH-Exp5-ChIP-ES-CTCF-IP-Blobel-Rep2-S1_S2_MACS2_rendition_1E-8_downsampled_try3_peak_1154	462	19.2309	46.2772	43.4747	120
chr1	78416152	78416554	Project004-IPSHOCH-Exp5-ChIP-ES-CTCF-IP-Blobel-Rep2-S1_S2_MACS2_rendition_1E-8_downsampled_try3_peak_1155	939	25.3125	93.9706	90.5741	197
chr1	78451231	78451663	Project004-IPSHOCH-Exp5-ChIP-ES-CTCF-IP-Blobel-Rep2-S1_S2_MACS2_rendition_1E-8_downsampled_try3_peak_1156	873	27.973	87.3842	84.0695	198
chr1	78521684	78522363	Project004-IPSHOCH-Exp5-ChIP-ES-CTCF-IP-Blobel-Rep2-S1_S2_MACS2_rendition_1E-8_downsampled_try3_peak_1157	2496	55.078	249.629	244.124	318
chr1	78527137	78527346	Project004-IPSHOCH-Exp5-ChIP-ES-CTCF-IP-Blobel-Rep2-S1_S2_MACS2_rendition_1E-8_downsampled_try3_peak_1158	243	10.3831	24.3447	21.8236	112
chr1	78533417	78533825	Project004-IPSHOCH-Exp5-ChIP-ES-CTCF-IP-Blobel-Rep2-S1_S2_MACS2_rendition_1E-8_downsampled_try3_peak_1159	1562	48.7355	156.225	151.903	143
chr1	78553932	78554273	Project004-IPSHOCH-Exp5-ChIP-ES-CTCF-IP-Blobel-Rep2-S1_S2_MACS2_rendition_1E-8_downsampled_try3_peak_1160	623	18.75	62.3143	59.3228	151
chr1	78683492	78683788	Project004-IPSHOCH-Exp5-ChIP-ES-CTCF-IP-Blobel-Rep2-S1_S2_MACS2_rendition_1E-8_downsampled_try3_peak_1161	211	6.85185	21.1886	18.7147	178
chr1	78703883	78704263	Project004-IPSHOCH-Exp5-ChIP-ES-CTCF-IP-Blobel-Rep2-S1_S2_MACS2_rendition_1E-8_downsampled_try3_peak_1162	679	25.2416	67.9119	64.8492	126
chr1	78721066	78721416	Project004-IPSHOCH-Exp5-ChIP-ES-CTCF-IP-Blobel-Rep2-S1_S2_MACS2_rendition_1E-8_downsampled_try3_peak_1163	889	19.2857	88.9621	85.6299	152
chr1	78843084	78843378	Project004-IPSHOCH-Exp5-ChIP-ES-CTCF-IP-Blobel-Rep2-S1_S2_MACS2_rendition_1E-8_downsampled_try3_peak_1164	633	24.0871	63.3544	60.3485	151
chr1	78966149	78966315	Project004-IPSHOCH-Exp5-ChIP-ES-CTCF-IP-Blobel-Rep2-S1_S2_MACS2_rendition_1E-8_downsampled_try3_peak_1165	165	9.18919	16.529	14.131	71
chr1	79436649	79436895	Project004-IPSHOCH-Exp5-ChIP-ES-CTCF-IP-Blobel-Rep2-S1_S2_MACS2_rendition_1E-8_downsampled_try3_peak_1166	175	7.8125	17.5473	15.1358	110
chr1	79611061	79611327	Project004-IPSHOCH-Exp5-ChIP-ES-CTCF-IP-Blobel-Rep2-S1_S2_MACS2_rendition_1E-8_downsampled_try3_peak_1167	293	12.5676	29.3754	26.781	117
chr1	79622863	79623044	Project004-IPSHOCH-Exp5-ChIP-ES-CTCF-IP-Blobel-Rep2-S1_S2_MACS2_rendition_1E-8_downsampled_try3_peak_1168	194	10.1166	19.4875	17.0388	124
chr1	79679603	79679939	Project004-IPSHOCH-Exp5-ChIP-ES-CTCF-IP-Blobel-Rep2-S1_S2_MACS2_rendition_1E-8_downsampled_try3_peak_1169	567	20.2703	56.7908	53.8633	154
chr1	79779098	79779379	Project004-IPSHOCH-Exp5-ChIP-ES-CTCF-IP-Blobel-Rep2-S1_S2_MACS2_rendition_1E-8_downsampled_try3_peak_1170	552	19.8649	55.2579	52.3488	128
chr1	79783115	79783422	Project004-IPSHOCH-Exp5-ChIP-ES-CTCF-IP-Blobel-Rep2-S1_S2_MACS2_rendition_1E-8_downsampled_try3_peak_1171	606	23.994	60.6786	57.7043	155
chr1	80176782	80177081	Project004-IPSHOCH-Exp5-ChIP-ES-CTCF-IP-Blobel-Rep2-S1_S2_MACS2_rendition_1E-8_downsampled_try3_peak_1172	511	17.5439	51.1215	48.2614	139
chr1	80177394	80177962	Project004-IPSHOCH-Exp5-ChIP-ES-CTCF-IP-Blobel-Rep2-S1_S2_MACS2_rendition_1E-8_downsampled_try3_peak_1173	1079	32.8378	107.919	104.321	365
chr1	80227274	80227457	Project004-IPSHOCH-Exp5-ChIP-ES-CTCF-IP-Blobel-Rep2-S1_S2_MACS2_rendition_1E-8_downsampled_try3_peak_1174	175	7.8125	17.5473	15.1358	95
chr1	80240775	80240938	Project004-IPSHOCH-Exp5-ChIP-ES-CTCF-IP-Blobel-Rep2-S1_S2_MACS2_rendition_1E-8_downsampled_try3_peak_1175	136	7.70176	13.6546	11.3175	88
chr1	80296242	80296405	Project004-IPSHOCH-Exp5-ChIP-ES-CTCF-IP-Blobel-Rep2-S1_S2_MACS2_rendition_1E-8_downsampled_try3_peak_1176	134	6.5625	13.4274	11.0925	58
chr1	80405115	80405488	Project004-IPSHOCH-Exp5-ChIP-ES-CTCF-IP-Blobel-Rep2-S1_S2_MACS2_rendition_1E-8_downsampled_try3_peak_1177	908	24.6875	90.8436	87.4807	192
chr1	80501394	80501699	Project004-IPSHOCH-Exp5-ChIP-ES-CTCF-IP-Blobel-Rep2-S1_S2_MACS2_rendition_1E-8_downsampled_try3_peak_1178	442	18.8889	44.2197	41.4423	134
chr1	80509200	80509440	Project004-IPSHOCH-Exp5-ChIP-ES-CTCF-IP-Blobel-Rep2-S1_S2_MACS2_rendition_1E-8_downsampled_try3_peak_1179	197	8.4375	19.7116	17.2597	142
chr1	80512462	80512810	Project004-IPSHOCH-Exp5-ChIP-ES-CTCF-IP-Blobel-Rep2-S1_S2_MACS2_rendition_1E-8_downsampled_try3_peak_1180	376	15	37.6044	34.9104	147
chr1	80518799	80519170	Project004-IPSHOCH-Exp5-ChIP-ES-CTCF-IP-Blobel-Rep2-S1_S2_MACS2_rendition_1E-8_downsampled_try3_peak_1181	538	16.875	53.8102	50.9203	151
chr1	80652462	80652772	Project004-IPSHOCH-Exp5-ChIP-ES-CTCF-IP-Blobel-Rep2-S1_S2_MACS2_rendition_1E-8_downsampled_try3_peak_1182	418	16.2162	41.8796	39.1309	159
chr1	80719274	80719527	Project004-IPSHOCH-Exp5-ChIP-ES-CTCF-IP-Blobel-Rep2-S1_S2_MACS2_rendition_1E-8_downsampled_try3_peak_1183	352	9.44444	35.2471	32.5774	133
chr1	80724120	80724322	Project004-IPSHOCH-Exp5-ChIP-ES-CTCF-IP-Blobel-Rep2-S1_S2_MACS2_rendition_1E-8_downsampled_try3_peak_1184	134	7.2973	13.4146	11.0819	94
chr1	80724823	80725061	Project004-IPSHOCH-Exp5-ChIP-ES-CTCF-IP-Blobel-Rep2-S1_S2_MACS2_rendition_1E-8_downsampled_try3_peak_1185	332	14.8485	33.24	30.6032	126
chr1	80827014	80827230	Project004-IPSHOCH-Exp5-ChIP-ES-CTCF-IP-Blobel-Rep2-S1_S2_MACS2_rendition_1E-8_downsampled_try3_peak_1186	250	11.8433	25.0904	22.5581	150
chr1	81283760	81284062	Project004-IPSHOCH-Exp5-ChIP-ES-CTCF-IP-Blobel-Rep2-S1_S2_MACS2_rendition_1E-8_downsampled_try3_peak_1187	780	29.0991	78.0578	74.8656	167
chr1	81297410	81297651	Project004-IPSHOCH-Exp5-ChIP-ES-CTCF-IP-Blobel-Rep2-S1_S2_MACS2_rendition_1E-8_downsampled_try3_peak_1188	280	12.1622	28.0497	25.4743	132
chr1	81298309	81298610	Project004-IPSHOCH-Exp5-ChIP-ES-CTCF-IP-Blobel-Rep2-S1_S2_MACS2_rendition_1E-8_downsampled_try3_peak_1189	630	21.8919	63.0066	60.0042	176
chr1	81299979	81300309	Project004-IPSHOCH-Exp5-ChIP-ES-CTCF-IP-Blobel-Rep2-S1_S2_MACS2_rendition_1E-8_downsampled_try3_peak_1190	178	9.6997	17.8272	15.4061	103
chr1	81304051	81304317	Project004-IPSHOCH-Exp5-ChIP-ES-CTCF-IP-Blobel-Rep2-S1_S2_MACS2_rendition_1E-8_downsampled_try3_peak_1191	426	18.3784	42.633	39.8736	141
chr1	81306699	81306992	Project004-IPSHOCH-Exp5-ChIP-ES-CTCF-IP-Blobel-Rep2-S1_S2_MACS2_rendition_1E-8_downsampled_try3_peak_1192	700	18.0509	70.0029	66.9143	159
chr1	81313056	81313550	Project004-IPSHOCH-Exp5-ChIP-ES-CTCF-IP-Blobel-Rep2-S1_S2_MACS2_rendition_1E-8_downsampled_try3_peak_1193	890	28.3784	89.0631	85.7257	293
chr1	81316420	81316667	Project004-IPSHOCH-Exp5-ChIP-ES-CTCF-IP-Blobel-Rep2-S1_S2_MACS2_rendition_1E-8_downsampled_try3_peak_1194	232	11.7417	23.2312	20.7218	120
chr1	81513156	81513530	Project004-IPSHOCH-Exp5-ChIP-ES-CTCF-IP-Blobel-Rep2-S1_S2_MACS2_rendition_1E-8_downsampled_try3_peak_1195	477	17.8378	47.7286	44.9083	138
chr1	81588304	81588534	Project004-IPSHOCH-Exp5-ChIP-ES-CTCF-IP-Blobel-Rep2-S1_S2_MACS2_rendition_1E-8_downsampled_try3_peak_1196	379	16.8468	37.9453	35.2413	119
chr1	82286800	82287024	Project004-IPSHOCH-Exp5-ChIP-ES-CTCF-IP-Blobel-Rep2-S1_S2_MACS2_rendition_1E-8_downsampled_try3_peak_1197	267	12.0957	26.7064	24.1524	97
chr1	82288262	82288428	Project004-IPSHOCH-Exp5-ChIP-ES-CTCF-IP-Blobel-Rep2-S1_S2_MACS2_rendition_1E-8_downsampled_try3_peak_1198	254	11.3514	25.4413	22.9023	51
chr1	82290614	82291125	Project004-IPSHOCH-Exp5-ChIP-ES-CTCF-IP-Blobel-Rep2-S1_S2_MACS2_rendition_1E-8_downsampled_try3_peak_1199	640	25.015	64.0869	61.0712	312
chr1	82378537	82378805	Project004-IPSHOCH-Exp5-ChIP-ES-CTCF-IP-Blobel-Rep2-S1_S2_MACS2_rendition_1E-8_downsampled_try3_peak_1200	523	21.4414	52.3213	49.4467	147
chr1	82429987	82430277	Project004-IPSHOCH-Exp5-ChIP-ES-CTCF-IP-Blobel-Rep2-S1_S2_MACS2_rendition_1E-8_downsampled_try3_peak_1201	710	20.625	71.0769	67.9713	137
chr1	82472823	82473246	Project004-IPSHOCH-Exp5-ChIP-ES-CTCF-IP-Blobel-Rep2-S1_S2_MACS2_rendition_1E-8_downsampled_try3_peak_1202	1114	33.6487	111.42	107.771	232
chr1	82478064	82478279	Project004-IPSHOCH-Exp5-ChIP-ES-CTCF-IP-Blobel-Rep2-S1_S2_MACS2_rendition_1E-8_downsampled_try3_peak_1203	232	11.7417	23.2312	20.7218	90
chr1	82550947	82551241	Project004-IPSHOCH-Exp5-ChIP-ES-CTCF-IP-Blobel-Rep2-S1_S2_MACS2_rendition_1E-8_downsampled_try3_peak_1204	658	25.5255	65.8043	62.7688	132
chr1	82568385	82568633	Project004-IPSHOCH-Exp5-ChIP-ES-CTCF-IP-Blobel-Rep2-S1_S2_MACS2_rendition_1E-8_downsampled_try3_peak_1205	462	17.4324	46.2512	43.4487	125
chr1	82638129	82638654	Project004-IPSHOCH-Exp5-ChIP-ES-CTCF-IP-Blobel-Rep2-S1_S2_MACS2_rendition_1E-8_downsampled_try3_peak_1206	1833	49.4595	183.334	178.618	320
chr1	82756114	82756501	Project004-IPSHOCH-Exp5-ChIP-ES-CTCF-IP-Blobel-Rep2-S1_S2_MACS2_rendition_1E-8_downsampled_try3_peak_1207	700	18.0509	70.0029	66.9143	171
chr1	82758912	82759216	Project004-IPSHOCH-Exp5-ChIP-ES-CTCF-IP-Blobel-Rep2-S1_S2_MACS2_rendition_1E-8_downsampled_try3_peak_1208	583	22.6419	58.3787	55.432	158
chr1	82769753	82769986	Project004-IPSHOCH-Exp5-ChIP-ES-CTCF-IP-Blobel-Rep2-S1_S2_MACS2_rendition_1E-8_downsampled_try3_peak_1209	264	11.2214	26.4179	23.8676	106
chr1	82783924	82784259	Project004-IPSHOCH-Exp5-ChIP-ES-CTCF-IP-Blobel-Rep2-S1_S2_MACS2_rendition_1E-8_downsampled_try3_peak_1210	472	12.4286	47.208	44.398	201
chr1	82785949	82786162	Project004-IPSHOCH-Exp5-ChIP-ES-CTCF-IP-Blobel-Rep2-S1_S2_MACS2_rendition_1E-8_downsampled_try3_peak_1211	376	15.8566	37.6604	34.9663	136
chr1	82800167	82800643	Project004-IPSHOCH-Exp5-ChIP-ES-CTCF-IP-Blobel-Rep2-S1_S2_MACS2_rendition_1E-8_downsampled_try3_peak_1212	1130	38.7988	113.074	109.407	219
chr1	82835745	82836198	Project004-IPSHOCH-Exp5-ChIP-ES-CTCF-IP-Blobel-Rep2-S1_S2_MACS2_rendition_1E-8_downsampled_try3_peak_1213	2598	58.3684	259.813	254.198	211
chr1	82956587	82956936	Project004-IPSHOCH-Exp5-ChIP-ES-CTCF-IP-Blobel-Rep2-S1_S2_MACS2_rendition_1E-8_downsampled_try3_peak_1214	506	20.9309	50.6795	47.8272	188
chr1	82984318	82984729	Project004-IPSHOCH-Exp5-ChIP-ES-CTCF-IP-Blobel-Rep2-S1_S2_MACS2_rendition_1E-8_downsampled_try3_peak_1215	992	30.8108	99.2628	95.7882	244
chr1	82996987	82997232	Project004-IPSHOCH-Exp5-ChIP-ES-CTCF-IP-Blobel-Rep2-S1_S2_MACS2_rendition_1E-8_downsampled_try3_peak_1216	376	15	37.6044	34.9104	104
chr1	83061191	83061776	Project004-IPSHOCH-Exp5-ChIP-ES-CTCF-IP-Blobel-Rep2-S1_S2_MACS2_rendition_1E-8_downsampled_try3_peak_1217	898	30.5193	89.8816	86.5371	392
chr1	83072692	83073061	Project004-IPSHOCH-Exp5-ChIP-ES-CTCF-IP-Blobel-Rep2-S1_S2_MACS2_rendition_1E-8_downsampled_try3_peak_1218	870	21.1017	87.0636	83.7552	211
chr1	83146887	83147128	Project004-IPSHOCH-Exp5-ChIP-ES-CTCF-IP-Blobel-Rep2-S1_S2_MACS2_rendition_1E-8_downsampled_try3_peak_1219	402	13.75	40.2917	37.5643	137
chr1	83178095	83178325	Project004-IPSHOCH-Exp5-ChIP-ES-CTCF-IP-Blobel-Rep2-S1_S2_MACS2_rendition_1E-8_downsampled_try3_peak_1220	228	10.5405	22.8938	20.394	112
chr1	83183740	83184129	Project004-IPSHOCH-Exp5-ChIP-ES-CTCF-IP-Blobel-Rep2-S1_S2_MACS2_rendition_1E-8_downsampled_try3_peak_1221	567	20.2703	56.7908	53.8633	192
chr1	83219699	83219898	Project004-IPSHOCH-Exp5-ChIP-ES-CTCF-IP-Blobel-Rep2-S1_S2_MACS2_rendition_1E-8_downsampled_try3_peak_1222	206	7.88136	20.6591	18.1907	110
chr1	83359756	83360020	Project004-IPSHOCH-Exp5-ChIP-ES-CTCF-IP-Blobel-Rep2-S1_S2_MACS2_rendition_1E-8_downsampled_try3_peak_1223	267	11.7568	26.7382	24.1807	162
chr1	83403820	83403990	Project004-IPSHOCH-Exp5-ChIP-ES-CTCF-IP-Blobel-Rep2-S1_S2_MACS2_rendition_1E-8_downsampled_try3_peak_1224	152	8.67868	15.2542	12.8807	72
chr1	83713675	83714008	Project004-IPSHOCH-Exp5-ChIP-ES-CTCF-IP-Blobel-Rep2-S1_S2_MACS2_rendition_1E-8_downsampled_try3_peak_1225	640	25.015	64.0869	61.0712	127
chr1	83723784	83724085	Project004-IPSHOCH-Exp5-ChIP-ES-CTCF-IP-Blobel-Rep2-S1_S2_MACS2_rendition_1E-8_downsampled_try3_peak_1226	606	23.994	60.6786	57.7043	146
chr1	83733078	83733321	Project004-IPSHOCH-Exp5-ChIP-ES-CTCF-IP-Blobel-Rep2-S1_S2_MACS2_rendition_1E-8_downsampled_try3_peak_1227	490	20.4204	49.0482	46.2139	122
chr1	83742589	83742950	Project004-IPSHOCH-Exp5-ChIP-ES-CTCF-IP-Blobel-Rep2-S1_S2_MACS2_rendition_1E-8_downsampled_try3_peak_1228	539	21.952	53.9732	51.077	225
chr1	83807803	83808218	Project004-IPSHOCH-Exp5-ChIP-ES-CTCF-IP-Blobel-Rep2-S1_S2_MACS2_rendition_1E-8_downsampled_try3_peak_1229	762	28.5886	76.2836	73.1138	131
chr1	84098594	84098982	Project004-IPSHOCH-Exp5-ChIP-ES-CTCF-IP-Blobel-Rep2-S1_S2_MACS2_rendition_1E-8_downsampled_try3_peak_1230	692	26.5465	69.2647	66.1871	216
chr1	84125174	84125413	Project004-IPSHOCH-Exp5-ChIP-ES-CTCF-IP-Blobel-Rep2-S1_S2_MACS2_rendition_1E-8_downsampled_try3_peak_1231	333	14.934	33.3837	30.74	141
chr1	84126981	84127155	Project004-IPSHOCH-Exp5-ChIP-ES-CTCF-IP-Blobel-Rep2-S1_S2_MACS2_rendition_1E-8_downsampled_try3_peak_1232	164	7.5	16.4902	14.1	118
chr1	84150467	84150900	Project004-IPSHOCH-Exp5-ChIP-ES-CTCF-IP-Blobel-Rep2-S1_S2_MACS2_rendition_1E-8_downsampled_try3_peak_1233	677	23.1081	67.7527	64.6901	248
chr1	84279673	84279884	Project004-IPSHOCH-Exp5-ChIP-ES-CTCF-IP-Blobel-Rep2-S1_S2_MACS2_rendition_1E-8_downsampled_try3_peak_1234	218	10.8919	21.8174	19.3363	142
chr1	84283361	84283736	Project004-IPSHOCH-Exp5-ChIP-ES-CTCF-IP-Blobel-Rep2-S1_S2_MACS2_rendition_1E-8_downsampled_try3_peak_1235	831	23.125	83.1228	79.8667	233
chr1	84380130	84380331	Project004-IPSHOCH-Exp5-ChIP-ES-CTCF-IP-Blobel-Rep2-S1_S2_MACS2_rendition_1E-8_downsampled_try3_peak_1236	230	11.6151	23.0201	20.52	114
chr1	84430238	84430498	Project004-IPSHOCH-Exp5-ChIP-ES-CTCF-IP-Blobel-Rep2-S1_S2_MACS2_rendition_1E-8_downsampled_try3_peak_1237	144	6.875	14.4294	12.0758	102
chr1	84466940	84467508	Project004-IPSHOCH-Exp5-ChIP-ES-CTCF-IP-Blobel-Rep2-S1_S2_MACS2_rendition_1E-8_downsampled_try3_peak_1238	1534	36.5625	153.483	149.203	181
chr1	84578405	84578845	Project004-IPSHOCH-Exp5-ChIP-ES-CTCF-IP-Blobel-Rep2-S1_S2_MACS2_rendition_1E-8_downsampled_try3_peak_1239	807	26.3514	80.732	77.5056	179
chr1	84692812	84693055	Project004-IPSHOCH-Exp5-ChIP-ES-CTCF-IP-Blobel-Rep2-S1_S2_MACS2_rendition_1E-8_downsampled_try3_peak_1240	216	10.1351	21.6442	19.1647	114
chr1	84693520	84694363	Project004-IPSHOCH-Exp5-ChIP-ES-CTCF-IP-Blobel-Rep2-S1_S2_MACS2_rendition_1E-8_downsampled_try3_peak_1241	1448	35	144.891	140.744	513
chr1	84730319	84730724	Project004-IPSHOCH-Exp5-ChIP-ES-CTCF-IP-Blobel-Rep2-S1_S2_MACS2_rendition_1E-8_downsampled_try3_peak_1242	566	17.5	56.6146	53.6917	247
chr1	84738050	84738306	Project004-IPSHOCH-Exp5-ChIP-ES-CTCF-IP-Blobel-Rep2-S1_S2_MACS2_rendition_1E-8_downsampled_try3_peak_1243	293	12.5676	29.3754	26.781	136
chr1	84813744	84813913	Project004-IPSHOCH-Exp5-ChIP-ES-CTCF-IP-Blobel-Rep2-S1_S2_MACS2_rendition_1E-8_downsampled_try3_peak_1244	134	7.84337	13.4728	11.1374	144
chr1	84838409	84838663	Project004-IPSHOCH-Exp5-ChIP-ES-CTCF-IP-Blobel-Rep2-S1_S2_MACS2_rendition_1E-8_downsampled_try3_peak_1245	306	12.9541	30.6823	28.0736	121
chr1	84863307	84863606	Project004-IPSHOCH-Exp5-ChIP-ES-CTCF-IP-Blobel-Rep2-S1_S2_MACS2_rendition_1E-8_downsampled_try3_peak_1246	454	16.1117	45.4281	42.6397	152
chr1	84866187	84866492	Project004-IPSHOCH-Exp5-ChIP-ES-CTCF-IP-Blobel-Rep2-S1_S2_MACS2_rendition_1E-8_downsampled_try3_peak_1247	439	14.1565	43.9415	41.1709	156
chr1	84876325	84876618	Project004-IPSHOCH-Exp5-ChIP-ES-CTCF-IP-Blobel-Rep2-S1_S2_MACS2_rendition_1E-8_downsampled_try3_peak_1248	280	12.1622	28.0497	25.4743	147
chr1	84877137	84877353	Project004-IPSHOCH-Exp5-ChIP-ES-CTCF-IP-Blobel-Rep2-S1_S2_MACS2_rendition_1E-8_downsampled_try3_peak_1249	267	12.0957	26.7064	24.1524	131
chr1	84877812	84878285	Project004-IPSHOCH-Exp5-ChIP-ES-CTCF-IP-Blobel-Rep2-S1_S2_MACS2_rendition_1E-8_downsampled_try3_peak_1250	914	17.963	91.4592	88.092	244
chr1	84880598	84880795	Project004-IPSHOCH-Exp5-ChIP-ES-CTCF-IP-Blobel-Rep2-S1_S2_MACS2_rendition_1E-8_downsampled_try3_peak_1251	173	8.84347	17.3755	14.9668	69
chr1	84881813	84882125	Project004-IPSHOCH-Exp5-ChIP-ES-CTCF-IP-Blobel-Rep2-S1_S2_MACS2_rendition_1E-8_downsampled_try3_peak_1252	811	24.0341	81.1845	77.9562	151
chr1	84882501	84882853	Project004-IPSHOCH-Exp5-ChIP-ES-CTCF-IP-Blobel-Rep2-S1_S2_MACS2_rendition_1E-8_downsampled_try3_peak_1253	1225	36.3807	122.574	118.769	207
chr1	84893268	84893509	Project004-IPSHOCH-Exp5-ChIP-ES-CTCF-IP-Blobel-Rep2-S1_S2_MACS2_rendition_1E-8_downsampled_try3_peak_1254	128	5.84746	12.8808	10.5568	154
chr1	84930041	84930455	Project004-IPSHOCH-Exp5-ChIP-ES-CTCF-IP-Blobel-Rep2-S1_S2_MACS2_rendition_1E-8_downsampled_try3_peak_1255	1994	51.685	199.449	194.526	200
chr1	84991438	84991639	Project004-IPSHOCH-Exp5-ChIP-ES-CTCF-IP-Blobel-Rep2-S1_S2_MACS2_rendition_1E-8_downsampled_try3_peak_1256	423	12.7119	42.3632	39.611	131
chr1	85065752	85065936	Project004-IPSHOCH-Exp5-ChIP-ES-CTCF-IP-Blobel-Rep2-S1_S2_MACS2_rendition_1E-8_downsampled_try3_peak_1257	161	6.21429	16.1187	13.7325	101
chr1	85111379	85111767	Project004-IPSHOCH-Exp5-ChIP-ES-CTCF-IP-Blobel-Rep2-S1_S2_MACS2_rendition_1E-8_downsampled_try3_peak_1258	885	13.44	88.5374	85.2127	163
chr1	85116846	85117090	Project004-IPSHOCH-Exp5-ChIP-ES-CTCF-IP-Blobel-Rep2-S1_S2_MACS2_rendition_1E-8_downsampled_try3_peak_1259	303	14.2943	30.3973	27.7914	105
chr1	85240149	85240458	Project004-IPSHOCH-Exp5-ChIP-ES-CTCF-IP-Blobel-Rep2-S1_S2_MACS2_rendition_1E-8_downsampled_try3_peak_1260	300	12.2341	30.071	27.474	223
chr1	85283758	85284058	Project004-IPSHOCH-Exp5-ChIP-ES-CTCF-IP-Blobel-Rep2-S1_S2_MACS2_rendition_1E-8_downsampled_try3_peak_1261	753	12.7632	75.3235	72.1709	142
chr1	85319829	85320127	Project004-IPSHOCH-Exp5-ChIP-ES-CTCF-IP-Blobel-Rep2-S1_S2_MACS2_rendition_1E-8_downsampled_try3_peak_1262	818	10.6509	81.8741	78.6338	146
chr1	85338839	85339111	Project004-IPSHOCH-Exp5-ChIP-ES-CTCF-IP-Blobel-Rep2-S1_S2_MACS2_rendition_1E-8_downsampled_try3_peak_1263	572	10.6579	57.2101	54.2799	141
chr1	87478108	87478411	Project004-IPSHOCH-Exp5-ChIP-ES-CTCF-IP-Blobel-Rep2-S1_S2_MACS2_rendition_1E-8_downsampled_try3_peak_1264	618	19.3578	61.8112	58.8241	160
chr1	87633109	87633416	Project004-IPSHOCH-Exp5-ChIP-ES-CTCF-IP-Blobel-Rep2-S1_S2_MACS2_rendition_1E-8_downsampled_try3_peak_1265	861	18.8571	86.1865	82.8912	155
chr1	87689741	87690101	Project004-IPSHOCH-Exp5-ChIP-ES-CTCF-IP-Blobel-Rep2-S1_S2_MACS2_rendition_1E-8_downsampled_try3_peak_1266	1190	28.4884	119.078	115.319	209
chr1	87738875	87739282	Project004-IPSHOCH-Exp5-ChIP-ES-CTCF-IP-Blobel-Rep2-S1_S2_MACS2_rendition_1E-8_downsampled_try3_peak_1267	583	20.6757	58.3323	55.3866	140
chr1	87749823	87750366	Project004-IPSHOCH-Exp5-ChIP-ES-CTCF-IP-Blobel-Rep2-S1_S2_MACS2_rendition_1E-8_downsampled_try3_peak_1268	2269	42.9661	226.913	221.672	261
chr1	87751111	87751278	Project004-IPSHOCH-Exp5-ChIP-ES-CTCF-IP-Blobel-Rep2-S1_S2_MACS2_rendition_1E-8_downsampled_try3_peak_1269	123	6.89189	12.3237	10.0163	88
chr1	87792092	87792432	Project004-IPSHOCH-Exp5-ChIP-ES-CTCF-IP-Blobel-Rep2-S1_S2_MACS2_rendition_1E-8_downsampled_try3_peak_1270	552	17.1875	55.2085	52.303	179
chr1	87796051	87796452	Project004-IPSHOCH-Exp5-ChIP-ES-CTCF-IP-Blobel-Rep2-S1_S2_MACS2_rendition_1E-8_downsampled_try3_peak_1271	474	19.9099	47.4277	44.6113	202
chr1	87831999	87832413	Project004-IPSHOCH-Exp5-ChIP-ES-CTCF-IP-Blobel-Rep2-S1_S2_MACS2_rendition_1E-8_downsampled_try3_peak_1272	1346	38.9189	134.659	130.664	190
chr1	87904442	87904866	Project004-IPSHOCH-Exp5-ChIP-ES-CTCF-IP-Blobel-Rep2-S1_S2_MACS2_rendition_1E-8_downsampled_try3_peak_1273	1483	35.625	148.316	144.115	160
chr1	87918245	87918493	Project004-IPSHOCH-Exp5-ChIP-ES-CTCF-IP-Blobel-Rep2-S1_S2_MACS2_rendition_1E-8_downsampled_try3_peak_1274	371	13.9635	37.1788	34.4898	118
chr1	87956034	87956412	Project004-IPSHOCH-Exp5-ChIP-ES-CTCF-IP-Blobel-Rep2-S1_S2_MACS2_rendition_1E-8_downsampled_try3_peak_1275	1857	46.1869	185.758	181.01	173
chr1	87959112	87959365	Project004-IPSHOCH-Exp5-ChIP-ES-CTCF-IP-Blobel-Rep2-S1_S2_MACS2_rendition_1E-8_downsampled_try3_peak_1276	466	17.6635	46.6529	43.8495	110
chr1	87960704	87961115	Project004-IPSHOCH-Exp5-ChIP-ES-CTCF-IP-Blobel-Rep2-S1_S2_MACS2_rendition_1E-8_downsampled_try3_peak_1277	1598	42.2672	159.8	155.428	202
chr1	87990375	87990621	Project004-IPSHOCH-Exp5-ChIP-ES-CTCF-IP-Blobel-Rep2-S1_S2_MACS2_rendition_1E-8_downsampled_try3_peak_1278	178	8.24025	17.8302	15.409	102
chr1	88040843	88041158	Project004-IPSHOCH-Exp5-ChIP-ES-CTCF-IP-Blobel-Rep2-S1_S2_MACS2_rendition_1E-8_downsampled_try3_peak_1279	477	17.8378	47.7286	44.9083	160
chr1	88049187	88049613	Project004-IPSHOCH-Exp5-ChIP-ES-CTCF-IP-Blobel-Rep2-S1_S2_MACS2_rendition_1E-8_downsampled_try3_peak_1280	710	25.0109	71.0618	67.9588	150
chr1	88071217	88071474	Project004-IPSHOCH-Exp5-ChIP-ES-CTCF-IP-Blobel-Rep2-S1_S2_MACS2_rendition_1E-8_downsampled_try3_peak_1281	163	8.79844	16.3418	13.9541	135
chr1	88075323	88075961	Project004-IPSHOCH-Exp5-ChIP-ES-CTCF-IP-Blobel-Rep2-S1_S2_MACS2_rendition_1E-8_downsampled_try3_peak_1282	3419	90.5675	341.93	335.306	281
chr1	88085588	88085936	Project004-IPSHOCH-Exp5-ChIP-ES-CTCF-IP-Blobel-Rep2-S1_S2_MACS2_rendition_1E-8_downsampled_try3_peak_1283	900	24.7493	90.021	86.6752	177
chr1	88110661	88111088	Project004-IPSHOCH-Exp5-ChIP-ES-CTCF-IP-Blobel-Rep2-S1_S2_MACS2_rendition_1E-8_downsampled_try3_peak_1284	1274	37.2973	127.422	123.541	217
chr1	88147321	88147637	Project004-IPSHOCH-Exp5-ChIP-ES-CTCF-IP-Blobel-Rep2-S1_S2_MACS2_rendition_1E-8_downsampled_try3_peak_1285	410	17.8679	41.0581	38.3178	121
chr1	88198390	88198637	Project004-IPSHOCH-Exp5-ChIP-ES-CTCF-IP-Blobel-Rep2-S1_S2_MACS2_rendition_1E-8_downsampled_try3_peak_1286	393	15.1994	39.3767	36.66	125
chr1	88206514	88206848	Project004-IPSHOCH-Exp5-ChIP-ES-CTCF-IP-Blobel-Rep2-S1_S2_MACS2_rendition_1E-8_downsampled_try3_peak_1287	256	8.75243	25.6744	23.1348	190
chr1	88207211	88207392	Project004-IPSHOCH-Exp5-ChIP-ES-CTCF-IP-Blobel-Rep2-S1_S2_MACS2_rendition_1E-8_downsampled_try3_peak_1288	224	9.61362	22.4001	19.9075	129
chr1	88210305	88210678	Project004-IPSHOCH-Exp5-ChIP-ES-CTCF-IP-Blobel-Rep2-S1_S2_MACS2_rendition_1E-8_downsampled_try3_peak_1289	820	18.2143	82.0602	78.8179	200
chr1	88235948	88236498	Project004-IPSHOCH-Exp5-ChIP-ES-CTCF-IP-Blobel-Rep2-S1_S2_MACS2_rendition_1E-8_downsampled_try3_peak_1290	1410	40.6671	141.076	136.989	225
chr1	88243683	88244001	Project004-IPSHOCH-Exp5-ChIP-ES-CTCF-IP-Blobel-Rep2-S1_S2_MACS2_rendition_1E-8_downsampled_try3_peak_1291	346	13.3043	34.6164	31.9618	160
chr1	88245505	88245683	Project004-IPSHOCH-Exp5-ChIP-ES-CTCF-IP-Blobel-Rep2-S1_S2_MACS2_rendition_1E-8_downsampled_try3_peak_1292	186	7.37288	18.6225	16.19	56
chr1	88260283	88260713	Project004-IPSHOCH-Exp5-ChIP-ES-CTCF-IP-Blobel-Rep2-S1_S2_MACS2_rendition_1E-8_downsampled_try3_peak_1293	1040	31.8264	104.085	100.546	195
chr1	88268549	88268853	Project004-IPSHOCH-Exp5-ChIP-ES-CTCF-IP-Blobel-Rep2-S1_S2_MACS2_rendition_1E-8_downsampled_try3_peak_1294	1030	25.0707	103.049	99.5242	147
chr1	88277568	88278022	Project004-IPSHOCH-Exp5-ChIP-ES-CTCF-IP-Blobel-Rep2-S1_S2_MACS2_rendition_1E-8_downsampled_try3_peak_1295	1851	42.1875	185.151	180.414	266
chr1	88285750	88286292	Project004-IPSHOCH-Exp5-ChIP-ES-CTCF-IP-Blobel-Rep2-S1_S2_MACS2_rendition_1E-8_downsampled_try3_peak_1296	1456	30.7627	145.621	141.465	303
chr1	88289540	88289808	Project004-IPSHOCH-Exp5-ChIP-ES-CTCF-IP-Blobel-Rep2-S1_S2_MACS2_rendition_1E-8_downsampled_try3_peak_1297	304	10.1695	30.4589	27.8523	140
chr1	88292487	88292913	Project004-IPSHOCH-Exp5-ChIP-ES-CTCF-IP-Blobel-Rep2-S1_S2_MACS2_rendition_1E-8_downsampled_try3_peak_1298	666	19.6875	66.6649	63.6183	178
chr1	88297878	88298151	Project004-IPSHOCH-Exp5-ChIP-ES-CTCF-IP-Blobel-Rep2-S1_S2_MACS2_rendition_1E-8_downsampled_try3_peak_1299	301	11.25	30.1722	27.5727	111
chr1	88301411	88301941	Project004-IPSHOCH-Exp5-ChIP-ES-CTCF-IP-Blobel-Rep2-S1_S2_MACS2_rendition_1E-8_downsampled_try3_peak_1300	1521	31.7797	152.118	147.865	196
chr1	88312259	88313282	Project004-IPSHOCH-Exp5-ChIP-ES-CTCF-IP-Blobel-Rep2-S1_S2_MACS2_rendition_1E-8_downsampled_try3_peak_1301	1280	31.875	128.002	124.114	763
chr1	88318568	88318871	Project004-IPSHOCH-Exp5-ChIP-ES-CTCF-IP-Blobel-Rep2-S1_S2_MACS2_rendition_1E-8_downsampled_try3_peak_1302	145	7.7027	14.5288	12.1698	141
chr1	88326495	88326977	Project004-IPSHOCH-Exp5-ChIP-ES-CTCF-IP-Blobel-Rep2-S1_S2_MACS2_rendition_1E-8_downsampled_try3_peak_1303	1558	28.9286	155.834	151.522	215
chr1	88335217	88335392	Project004-IPSHOCH-Exp5-ChIP-ES-CTCF-IP-Blobel-Rep2-S1_S2_MACS2_rendition_1E-8_downsampled_try3_peak_1304	168	8.22902	16.8253	14.4208	97
chr1	88336946	88337484	Project004-IPSHOCH-Exp5-ChIP-ES-CTCF-IP-Blobel-Rep2-S1_S2_MACS2_rendition_1E-8_downsampled_try3_peak_1305	1566	43.7201	156.676	152.351	307
chr1	88367870	88368300	Project004-IPSHOCH-Exp5-ChIP-ES-CTCF-IP-Blobel-Rep2-S1_S2_MACS2_rendition_1E-8_downsampled_try3_peak_1306	605	13.5185	60.5626	57.5934	280
chr1	88372012	88372243	Project004-IPSHOCH-Exp5-ChIP-ES-CTCF-IP-Blobel-Rep2-S1_S2_MACS2_rendition_1E-8_downsampled_try3_peak_1307	161	8.42235	16.1901	13.8035	96
chr1	88396475	88396997	Project004-IPSHOCH-Exp5-ChIP-ES-CTCF-IP-Blobel-Rep2-S1_S2_MACS2_rendition_1E-8_downsampled_try3_peak_1308	800	22.5	80.0747	76.8562	162
chr1	88397594	88398595	Project004-IPSHOCH-Exp5-ChIP-ES-CTCF-IP-Blobel-Rep2-S1_S2_MACS2_rendition_1E-8_downsampled_try3_peak_1309	1959	44.0625	195.945	191.067	761
chr1	88400706	88401096	Project004-IPSHOCH-Exp5-ChIP-ES-CTCF-IP-Blobel-Rep2-S1_S2_MACS2_rendition_1E-8_downsampled_try3_peak_1310	1063	31.3731	106.328	102.755	190
chr1	88405961	88406339	Project004-IPSHOCH-Exp5-ChIP-ES-CTCF-IP-Blobel-Rep2-S1_S2_MACS2_rendition_1E-8_downsampled_try3_peak_1311	1107	20.5556	110.716	107.085	173
chr1	88417040	88417315	Project004-IPSHOCH-Exp5-ChIP-ES-CTCF-IP-Blobel-Rep2-S1_S2_MACS2_rendition_1E-8_downsampled_try3_peak_1312	409	15.6621	40.9124	38.1777	121
chr1	88421805	88422295	Project004-IPSHOCH-Exp5-ChIP-ES-CTCF-IP-Blobel-Rep2-S1_S2_MACS2_rendition_1E-8_downsampled_try3_peak_1313	1312	28.4746	131.213	127.274	225
chr1	88424605	88425489	Project004-IPSHOCH-Exp5-ChIP-ES-CTCF-IP-Blobel-Rep2-S1_S2_MACS2_rendition_1E-8_downsampled_try3_peak_1314	1603	35.6105	160.393	156.011	339
chr1	88428897	88429370	Project004-IPSHOCH-Exp5-ChIP-ES-CTCF-IP-Blobel-Rep2-S1_S2_MACS2_rendition_1E-8_downsampled_try3_peak_1315	1312	28.4746	131.213	127.274	205
chr1	88430260	88430845	Project004-IPSHOCH-Exp5-ChIP-ES-CTCF-IP-Blobel-Rep2-S1_S2_MACS2_rendition_1E-8_downsampled_try3_peak_1316	857	27.5676	85.7116	82.4188	245
chr1	88433451	88433682	Project004-IPSHOCH-Exp5-ChIP-ES-CTCF-IP-Blobel-Rep2-S1_S2_MACS2_rendition_1E-8_downsampled_try3_peak_1317	344	15.5613	34.4387	31.7848	104
chr1	88435048	88435470	Project004-IPSHOCH-Exp5-ChIP-ES-CTCF-IP-Blobel-Rep2-S1_S2_MACS2_rendition_1E-8_downsampled_try3_peak_1318	1017	35.7357	101.767	98.2589	139
chr1	88436243	88436564	Project004-IPSHOCH-Exp5-ChIP-ES-CTCF-IP-Blobel-Rep2-S1_S2_MACS2_rendition_1E-8_downsampled_try3_peak_1319	234	11.5618	23.4793	20.9686	145
chr1	88495015	88495509	Project004-IPSHOCH-Exp5-ChIP-ES-CTCF-IP-Blobel-Rep2-S1_S2_MACS2_rendition_1E-8_downsampled_try3_peak_1320	766	28.2733	76.6476	73.476	228
chr1	88506148	88506361	Project004-IPSHOCH-Exp5-ChIP-ES-CTCF-IP-Blobel-Rep2-S1_S2_MACS2_rendition_1E-8_downsampled_try3_peak_1321	265	10.3125	26.5652	24.012	87
chr1	88508685	88509009	Project004-IPSHOCH-Exp5-ChIP-ES-CTCF-IP-Blobel-Rep2-S1_S2_MACS2_rendition_1E-8_downsampled_try3_peak_1322	755	23.939	75.5074	72.3534	179
chr1	88510851	88511272	Project004-IPSHOCH-Exp5-ChIP-ES-CTCF-IP-Blobel-Rep2-S1_S2_MACS2_rendition_1E-8_downsampled_try3_peak_1323	424	15.7099	42.4653	39.7114	181
chr1	88512241	88512451	Project004-IPSHOCH-Exp5-ChIP-ES-CTCF-IP-Blobel-Rep2-S1_S2_MACS2_rendition_1E-8_downsampled_try3_peak_1324	235	11.2651	23.5471	21.0358	131
chr1	88514991	88515424	Project004-IPSHOCH-Exp5-ChIP-ES-CTCF-IP-Blobel-Rep2-S1_S2_MACS2_rendition_1E-8_downsampled_try3_peak_1325	1282	37.7916	128.297	124.403	212
chr1	88517268	88517572	Project004-IPSHOCH-Exp5-ChIP-ES-CTCF-IP-Blobel-Rep2-S1_S2_MACS2_rendition_1E-8_downsampled_try3_peak_1326	219	9.0625	21.9387	19.4486	149
chr1	88546806	88547482	Project004-IPSHOCH-Exp5-ChIP-ES-CTCF-IP-Blobel-Rep2-S1_S2_MACS2_rendition_1E-8_downsampled_try3_peak_1327	1552	36.875	155.212	150.906	222
chr1	88549352	88549606	Project004-IPSHOCH-Exp5-ChIP-ES-CTCF-IP-Blobel-Rep2-S1_S2_MACS2_rendition_1E-8_downsampled_try3_peak_1328	227	10.7998	22.7672	20.2714	144
chr1	88566070	88566417	Project004-IPSHOCH-Exp5-ChIP-ES-CTCF-IP-Blobel-Rep2-S1_S2_MACS2_rendition_1E-8_downsampled_try3_peak_1329	820	18.2143	82.0602	78.8179	149
chr1	88593548	88593892	Project004-IPSHOCH-Exp5-ChIP-ES-CTCF-IP-Blobel-Rep2-S1_S2_MACS2_rendition_1E-8_downsampled_try3_peak_1330	799	28.5754	79.9133	76.6979	182
chr1	88595334	88595653	Project004-IPSHOCH-Exp5-ChIP-ES-CTCF-IP-Blobel-Rep2-S1_S2_MACS2_rendition_1E-8_downsampled_try3_peak_1331	715	25.7895	71.5035	68.3952	204
chr1	88596356	88596641	Project004-IPSHOCH-Exp5-ChIP-ES-CTCF-IP-Blobel-Rep2-S1_S2_MACS2_rendition_1E-8_downsampled_try3_peak_1332	630	20.9466	63.0431	60.0401	156
chr1	88746728	88746891	Project004-IPSHOCH-Exp5-ChIP-ES-CTCF-IP-Blobel-Rep2-S1_S2_MACS2_rendition_1E-8_downsampled_try3_peak_1333	144	8.18961	14.4522	12.0973	81
chr1	88811378	88811595	Project004-IPSHOCH-Exp5-ChIP-ES-CTCF-IP-Blobel-Rep2-S1_S2_MACS2_rendition_1E-8_downsampled_try3_peak_1334	208	8.75	20.8176	18.3458	103
chr1	88864941	88865162	Project004-IPSHOCH-Exp5-ChIP-ES-CTCF-IP-Blobel-Rep2-S1_S2_MACS2_rendition_1E-8_downsampled_try3_peak_1335	246	12.2523	24.6304	22.1021	95
chr1	88869283	88869549	Project004-IPSHOCH-Exp5-ChIP-ES-CTCF-IP-Blobel-Rep2-S1_S2_MACS2_rendition_1E-8_downsampled_try3_peak_1336	315	12.7176	31.5727	28.9552	125
chr1	88937713	88938046	Project004-IPSHOCH-Exp5-ChIP-ES-CTCF-IP-Blobel-Rep2-S1_S2_MACS2_rendition_1E-8_downsampled_try3_peak_1337	645	17.0339	64.5035	61.4846	171
chr1	88938636	88939038	Project004-IPSHOCH-Exp5-ChIP-ES-CTCF-IP-Blobel-Rep2-S1_S2_MACS2_rendition_1E-8_downsampled_try3_peak_1338	1313	32.5	131.347	127.404	215
chr1	88957570	88957843	Project004-IPSHOCH-Exp5-ChIP-ES-CTCF-IP-Blobel-Rep2-S1_S2_MACS2_rendition_1E-8_downsampled_try3_peak_1339	474	19.9099	47.4277	44.6113	137
chr1	88967294	88967751	Project004-IPSHOCH-Exp5-ChIP-ES-CTCF-IP-Blobel-Rep2-S1_S2_MACS2_rendition_1E-8_downsampled_try3_peak_1340	1328	38.5135	132.843	128.876	207
chr1	88983572	88983749	Project004-IPSHOCH-Exp5-ChIP-ES-CTCF-IP-Blobel-Rep2-S1_S2_MACS2_rendition_1E-8_downsampled_try3_peak_1341	187	9.97964	18.7656	16.3322	126
chr1	88995034	88995567	Project004-IPSHOCH-Exp5-ChIP-ES-CTCF-IP-Blobel-Rep2-S1_S2_MACS2_rendition_1E-8_downsampled_try3_peak_1342	1447	42.767	144.766	140.623	295
chr1	89008366	89008550	Project004-IPSHOCH-Exp5-ChIP-ES-CTCF-IP-Blobel-Rep2-S1_S2_MACS2_rendition_1E-8_downsampled_try3_peak_1343	267	11.7568	26.7382	24.1807	113
chr1	89070875	89071237	Project004-IPSHOCH-Exp5-ChIP-ES-CTCF-IP-Blobel-Rep2-S1_S2_MACS2_rendition_1E-8_downsampled_try3_peak_1344	1425	34.9029	142.523	138.411	161
chr1	89072388	89072668	Project004-IPSHOCH-Exp5-ChIP-ES-CTCF-IP-Blobel-Rep2-S1_S2_MACS2_rendition_1E-8_downsampled_try3_peak_1345	440	15.7537	44.0281	41.2563	121
chr1	89081015	89081752	Project004-IPSHOCH-Exp5-ChIP-ES-CTCF-IP-Blobel-Rep2-S1_S2_MACS2_rendition_1E-8_downsampled_try3_peak_1346	762	28.5886	76.2836	73.1138	535
chr1	89083528	89084123	Project004-IPSHOCH-Exp5-ChIP-ES-CTCF-IP-Blobel-Rep2-S1_S2_MACS2_rendition_1E-8_downsampled_try3_peak_1347	1871	50.2703	187.185	182.415	269
chr1	89088496	89088721	Project004-IPSHOCH-Exp5-ChIP-ES-CTCF-IP-Blobel-Rep2-S1_S2_MACS2_rendition_1E-8_downsampled_try3_peak_1348	263	12.5978	26.3514	23.8014	92
chr1	89102947	89103254	Project004-IPSHOCH-Exp5-ChIP-ES-CTCF-IP-Blobel-Rep2-S1_S2_MACS2_rendition_1E-8_downsampled_try3_peak_1349	270	9.40678	27.0855	24.5258	152
chr1	89105592	89105775	Project004-IPSHOCH-Exp5-ChIP-ES-CTCF-IP-Blobel-Rep2-S1_S2_MACS2_rendition_1E-8_downsampled_try3_peak_1350	209	10.0562	20.9634	18.4913	98
chr1	89114616	89115011	Project004-IPSHOCH-Exp5-ChIP-ES-CTCF-IP-Blobel-Rep2-S1_S2_MACS2_rendition_1E-8_downsampled_try3_peak_1351	973	29.758	97.3926	93.9471	158
chr1	89142639	89143152	Project004-IPSHOCH-Exp5-ChIP-ES-CTCF-IP-Blobel-Rep2-S1_S2_MACS2_rendition_1E-8_downsampled_try3_peak_1352	2046	53.9189	204.682	199.696	290
chr1	89178977	89179515	Project004-IPSHOCH-Exp5-ChIP-ES-CTCF-IP-Blobel-Rep2-S1_S2_MACS2_rendition_1E-8_downsampled_try3_peak_1353	867	26.5573	86.7694	83.468	234
chr1	89189475	89189787	Project004-IPSHOCH-Exp5-ChIP-ES-CTCF-IP-Blobel-Rep2-S1_S2_MACS2_rendition_1E-8_downsampled_try3_peak_1354	740	21.25	74.0511	70.9146	150
chr1	89223726	89223981	Project004-IPSHOCH-Exp5-ChIP-ES-CTCF-IP-Blobel-Rep2-S1_S2_MACS2_rendition_1E-8_downsampled_try3_peak_1355	216	8.13559	21.6982	19.2178	137
chr1	89240313	89240601	Project004-IPSHOCH-Exp5-ChIP-ES-CTCF-IP-Blobel-Rep2-S1_S2_MACS2_rendition_1E-8_downsampled_try3_peak_1356	114	5.9375	11.4842	9.19838	135
chr1	89261483	89261646	Project004-IPSHOCH-Exp5-ChIP-ES-CTCF-IP-Blobel-Rep2-S1_S2_MACS2_rendition_1E-8_downsampled_try3_peak_1357	145	7.7027	14.5288	12.1698	86
chr1	89276597	89276846	Project004-IPSHOCH-Exp5-ChIP-ES-CTCF-IP-Blobel-Rep2-S1_S2_MACS2_rendition_1E-8_downsampled_try3_peak_1358	499	16.4904	49.951	47.1063	123
chr1	89296116	89296302	Project004-IPSHOCH-Exp5-ChIP-ES-CTCF-IP-Blobel-Rep2-S1_S2_MACS2_rendition_1E-8_downsampled_try3_peak_1359	228	10.8558	22.8613	20.3651	94
chr1	89315185	89315646	Project004-IPSHOCH-Exp5-ChIP-ES-CTCF-IP-Blobel-Rep2-S1_S2_MACS2_rendition_1E-8_downsampled_try3_peak_1360	840	27.1622	84.0452	80.7743	278
chr1	89344047	89344457	Project004-IPSHOCH-Exp5-ChIP-ES-CTCF-IP-Blobel-Rep2-S1_S2_MACS2_rendition_1E-8_downsampled_try3_peak_1361	1551	39.1412	155.125	150.822	210
chr1	89400521	89400733	Project004-IPSHOCH-Exp5-ChIP-ES-CTCF-IP-Blobel-Rep2-S1_S2_MACS2_rendition_1E-8_downsampled_try3_peak_1362	159	8.82379	15.9275	13.5428	82
chr1	89404443	89404644	Project004-IPSHOCH-Exp5-ChIP-ES-CTCF-IP-Blobel-Rep2-S1_S2_MACS2_rendition_1E-8_downsampled_try3_peak_1363	214	10.9776	21.4286	18.954	106
chr1	89438204	89438502	Project004-IPSHOCH-Exp5-ChIP-ES-CTCF-IP-Blobel-Rep2-S1_S2_MACS2_rendition_1E-8_downsampled_try3_peak_1364	907	28.7838	90.7481	87.3883	153
chr1	89465002	89465313	Project004-IPSHOCH-Exp5-ChIP-ES-CTCF-IP-Blobel-Rep2-S1_S2_MACS2_rendition_1E-8_downsampled_try3_peak_1365	856	27.0172	85.6896	82.4011	145
chr1	89504916	89505509	Project004-IPSHOCH-Exp5-ChIP-ES-CTCF-IP-Blobel-Rep2-S1_S2_MACS2_rendition_1E-8_downsampled_try3_peak_1366	1518	46.8826	151.897	147.645	283
chr1	89560618	89561050	Project004-IPSHOCH-Exp5-ChIP-ES-CTCF-IP-Blobel-Rep2-S1_S2_MACS2_rendition_1E-8_downsampled_try3_peak_1367	1124	25.4237	112.495	108.837	178
chr1	89592946	89593332	Project004-IPSHOCH-Exp5-ChIP-ES-CTCF-IP-Blobel-Rep2-S1_S2_MACS2_rendition_1E-8_downsampled_try3_peak_1368	632	21.5354	63.2375	60.2326	205
chr1	89618062	89618356	Project004-IPSHOCH-Exp5-ChIP-ES-CTCF-IP-Blobel-Rep2-S1_S2_MACS2_rendition_1E-8_downsampled_try3_peak_1369	197	8.4375	19.7116	17.2597	134
chr1	89652354	89652632	Project004-IPSHOCH-Exp5-ChIP-ES-CTCF-IP-Blobel-Rep2-S1_S2_MACS2_rendition_1E-8_downsampled_try3_peak_1370	538	16.875	53.8102	50.9203	157
chr1	89662867	89663204	Project004-IPSHOCH-Exp5-ChIP-ES-CTCF-IP-Blobel-Rep2-S1_S2_MACS2_rendition_1E-8_downsampled_try3_peak_1371	564	15.5085	56.4493	53.529	179
chr1	89707098	89707301	Project004-IPSHOCH-Exp5-ChIP-ES-CTCF-IP-Blobel-Rep2-S1_S2_MACS2_rendition_1E-8_downsampled_try3_peak_1372	197	10.2944	19.7818	17.3298	118
chr1	89721885	89722197	Project004-IPSHOCH-Exp5-ChIP-ES-CTCF-IP-Blobel-Rep2-S1_S2_MACS2_rendition_1E-8_downsampled_try3_peak_1373	289	13.7838	28.9313	26.346	194
chr1	89819326	89819534	Project004-IPSHOCH-Exp5-ChIP-ES-CTCF-IP-Blobel-Rep2-S1_S2_MACS2_rendition_1E-8_downsampled_try3_peak_1374	214	9.7252	21.4906	19.015	96
chr1	89833106	89833440	Project004-IPSHOCH-Exp5-ChIP-ES-CTCF-IP-Blobel-Rep2-S1_S2_MACS2_rendition_1E-8_downsampled_try3_peak_1375	606	22.0315	60.6876	57.7126	146
chr1	89860219	89860479	Project004-IPSHOCH-Exp5-ChIP-ES-CTCF-IP-Blobel-Rep2-S1_S2_MACS2_rendition_1E-8_downsampled_try3_peak_1376	325	14.0412	32.5386	29.9069	145
chr1	89982229	89982497	Project004-IPSHOCH-Exp5-ChIP-ES-CTCF-IP-Blobel-Rep2-S1_S2_MACS2_rendition_1E-8_downsampled_try3_peak_1377	197	8.4375	19.7116	17.2597	138
chr1	90016998	90017598	Project004-IPSHOCH-Exp5-ChIP-ES-CTCF-IP-Blobel-Rep2-S1_S2_MACS2_rendition_1E-8_downsampled_try3_peak_1378	1003	23.3898	100.358	96.8671	324
chr1	90018035	90018428	Project004-IPSHOCH-Exp5-ChIP-ES-CTCF-IP-Blobel-Rep2-S1_S2_MACS2_rendition_1E-8_downsampled_try3_peak_1379	289	13.7838	28.9313	26.346	233
chr1	90040545	90041338	Project004-IPSHOCH-Exp5-ChIP-ES-CTCF-IP-Blobel-Rep2-S1_S2_MACS2_rendition_1E-8_downsampled_try3_peak_1380	1438	40.946	143.806	139.674	525
chr1	90041801	90042236	Project004-IPSHOCH-Exp5-ChIP-ES-CTCF-IP-Blobel-Rep2-S1_S2_MACS2_rendition_1E-8_downsampled_try3_peak_1381	374	11.6949	37.4879	34.7975	224
chr1	90046686	90046858	Project004-IPSHOCH-Exp5-ChIP-ES-CTCF-IP-Blobel-Rep2-S1_S2_MACS2_rendition_1E-8_downsampled_try3_peak_1382	216	10.1351	21.6442	19.1647	119
chr1	90113835	90114000	Project004-IPSHOCH-Exp5-ChIP-ES-CTCF-IP-Blobel-Rep2-S1_S2_MACS2_rendition_1E-8_downsampled_try3_peak_1383	156	6.61017	15.6784	13.2953	62
chr1	90174072	90174582	Project004-IPSHOCH-Exp5-ChIP-ES-CTCF-IP-Blobel-Rep2-S1_S2_MACS2_rendition_1E-8_downsampled_try3_peak_1384	1883	27.7174	188.309	183.531	204
chr1	90181407	90181898	Project004-IPSHOCH-Exp5-ChIP-ES-CTCF-IP-Blobel-Rep2-S1_S2_MACS2_rendition_1E-8_downsampled_try3_peak_1385	1859	38.1408	185.963	181.215	243
chr1	90184119	90184776	Project004-IPSHOCH-Exp5-ChIP-ES-CTCF-IP-Blobel-Rep2-S1_S2_MACS2_rendition_1E-8_downsampled_try3_peak_1386	1783	32.9119	178.369	173.725	225
chr1	90186425	90186970	Project004-IPSHOCH-Exp5-ChIP-ES-CTCF-IP-Blobel-Rep2-S1_S2_MACS2_rendition_1E-8_downsampled_try3_peak_1387	2007	39.1525	200.782	195.843	251
chr1	90198177	90198574	Project004-IPSHOCH-Exp5-ChIP-ES-CTCF-IP-Blobel-Rep2-S1_S2_MACS2_rendition_1E-8_downsampled_try3_peak_1388	909	25.6992	90.9018	87.5388	224
chr1	90215201	90215422	Project004-IPSHOCH-Exp5-ChIP-ES-CTCF-IP-Blobel-Rep2-S1_S2_MACS2_rendition_1E-8_downsampled_try3_peak_1389	588	20.9497	58.8113	55.8621	112
chr1	90253969	90254459	Project004-IPSHOCH-Exp5-ChIP-ES-CTCF-IP-Blobel-Rep2-S1_S2_MACS2_rendition_1E-8_downsampled_try3_peak_1390	1362	44.9249	136.287	132.272	238
chr1	90321170	90321610	Project004-IPSHOCH-Exp5-ChIP-ES-CTCF-IP-Blobel-Rep2-S1_S2_MACS2_rendition_1E-8_downsampled_try3_peak_1391	1330	32.8125	133.026	129.055	227
chr1	90330669	90331017	Project004-IPSHOCH-Exp5-ChIP-ES-CTCF-IP-Blobel-Rep2-S1_S2_MACS2_rendition_1E-8_downsampled_try3_peak_1392	873	27.973	87.3842	84.0695	158
chr1	90341992	90342383	Project004-IPSHOCH-Exp5-ChIP-ES-CTCF-IP-Blobel-Rep2-S1_S2_MACS2_rendition_1E-8_downsampled_try3_peak_1393	1019	34.6854	101.963	98.4489	216
chr1	90353202	90353660	Project004-IPSHOCH-Exp5-ChIP-ES-CTCF-IP-Blobel-Rep2-S1_S2_MACS2_rendition_1E-8_downsampled_try3_peak_1394	1530	42.973	153.059	148.786	234
chr1	90362363	90362627	Project004-IPSHOCH-Exp5-ChIP-ES-CTCF-IP-Blobel-Rep2-S1_S2_MACS2_rendition_1E-8_downsampled_try3_peak_1395	562	21.4091	56.2789	53.3597	110
chr1	90370576	90370822	Project004-IPSHOCH-Exp5-ChIP-ES-CTCF-IP-Blobel-Rep2-S1_S2_MACS2_rendition_1E-8_downsampled_try3_peak_1396	289	10.9375	28.9576	26.3703	115
chr1	90452622	90452787	Project004-IPSHOCH-Exp5-ChIP-ES-CTCF-IP-Blobel-Rep2-S1_S2_MACS2_rendition_1E-8_downsampled_try3_peak_1397	151	8.63725	15.1861	12.8217	58
chr1	90458936	90459321	Project004-IPSHOCH-Exp5-ChIP-ES-CTCF-IP-Blobel-Rep2-S1_S2_MACS2_rendition_1E-8_downsampled_try3_peak_1398	1162	23.3571	116.232	112.521	165
chr1	90601685	90602174	Project004-IPSHOCH-Exp5-ChIP-ES-CTCF-IP-Blobel-Rep2-S1_S2_MACS2_rendition_1E-8_downsampled_try3_peak_1399	447	17.027	44.7837	42	227
chr1	90602395	90602845	Project004-IPSHOCH-Exp5-ChIP-ES-CTCF-IP-Blobel-Rep2-S1_S2_MACS2_rendition_1E-8_downsampled_try3_peak_1400	1765	46.9864	176.523	171.9	217
chr1	90614388	90614657	Project004-IPSHOCH-Exp5-ChIP-ES-CTCF-IP-Blobel-Rep2-S1_S2_MACS2_rendition_1E-8_downsampled_try3_peak_1401	360	15.7165	36.0399	33.3678	134
chr1	90617468	90617820	Project004-IPSHOCH-Exp5-ChIP-ES-CTCF-IP-Blobel-Rep2-S1_S2_MACS2_rendition_1E-8_downsampled_try3_peak_1402	410	16.5869	41.0499	38.3149	191
chr1	90639038	90639349	Project004-IPSHOCH-Exp5-ChIP-ES-CTCF-IP-Blobel-Rep2-S1_S2_MACS2_rendition_1E-8_downsampled_try3_peak_1403	911	31.795	91.1018	87.7374	148
chr1	90641742	90642211	Project004-IPSHOCH-Exp5-ChIP-ES-CTCF-IP-Blobel-Rep2-S1_S2_MACS2_rendition_1E-8_downsampled_try3_peak_1404	945	20.1429	94.5702	91.1584	226
chr1	90646724	90647081	Project004-IPSHOCH-Exp5-ChIP-ES-CTCF-IP-Blobel-Rep2-S1_S2_MACS2_rendition_1E-8_downsampled_try3_peak_1405	710	20.625	71.0769	67.9713	192
chr1	90648855	90649146	Project004-IPSHOCH-Exp5-ChIP-ES-CTCF-IP-Blobel-Rep2-S1_S2_MACS2_rendition_1E-8_downsampled_try3_peak_1406	436	12.9661	43.6039	40.8367	173
chr1	90653203	90653532	Project004-IPSHOCH-Exp5-ChIP-ES-CTCF-IP-Blobel-Rep2-S1_S2_MACS2_rendition_1E-8_downsampled_try3_peak_1407	376	15	37.6044	34.9104	183
chr1	90673615	90673998	Project004-IPSHOCH-Exp5-ChIP-ES-CTCF-IP-Blobel-Rep2-S1_S2_MACS2_rendition_1E-8_downsampled_try3_peak_1408	551	15.2542	55.131	52.2279	175
chr1	90703599	90703900	Project004-IPSHOCH-Exp5-ChIP-ES-CTCF-IP-Blobel-Rep2-S1_S2_MACS2_rendition_1E-8_downsampled_try3_peak_1409	755	23.939	75.5074	72.3534	138
chr1	90712672	90712890	Project004-IPSHOCH-Exp5-ChIP-ES-CTCF-IP-Blobel-Rep2-S1_S2_MACS2_rendition_1E-8_downsampled_try3_peak_1410	210	9.78882	21.053	18.5801	125
chr1	90796999	90797201	Project004-IPSHOCH-Exp5-ChIP-ES-CTCF-IP-Blobel-Rep2-S1_S2_MACS2_rendition_1E-8_downsampled_try3_peak_1411	206	9.85869	20.63	18.1623	114
chr1	90823441	90823609	Project004-IPSHOCH-Exp5-ChIP-ES-CTCF-IP-Blobel-Rep2-S1_S2_MACS2_rendition_1E-8_downsampled_try3_peak_1412	137	6.10169	13.796	11.4567	108
chr1	90860467	90860687	Project004-IPSHOCH-Exp5-ChIP-ES-CTCF-IP-Blobel-Rep2-S1_S2_MACS2_rendition_1E-8_downsampled_try3_peak_1413	181	9.63484	18.1959	15.7686	97
chr1	90865094	90865318	Project004-IPSHOCH-Exp5-ChIP-ES-CTCF-IP-Blobel-Rep2-S1_S2_MACS2_rendition_1E-8_downsampled_try3_peak_1414	152	8.67868	15.2542	12.8807	118
chr1	90903307	90903550	Project004-IPSHOCH-Exp5-ChIP-ES-CTCF-IP-Blobel-Rep2-S1_S2_MACS2_rendition_1E-8_downsampled_try3_peak_1415	276	13.007	27.6304	25.0623	93
chr1	90954635	90954957	Project004-IPSHOCH-Exp5-ChIP-ES-CTCF-IP-Blobel-Rep2-S1_S2_MACS2_rendition_1E-8_downsampled_try3_peak_1416	619	21.7713	61.9387	58.9508	149
chr1	91023750	91024115	Project004-IPSHOCH-Exp5-ChIP-ES-CTCF-IP-Blobel-Rep2-S1_S2_MACS2_rendition_1E-8_downsampled_try3_peak_1417	467	16.8321	46.7257	43.9208	183
chr1	91071948	91072275	Project004-IPSHOCH-Exp5-ChIP-ES-CTCF-IP-Blobel-Rep2-S1_S2_MACS2_rendition_1E-8_downsampled_try3_peak_1418	1131	34.054	113.178	109.501	166
chr1	91088004	91088652	Project004-IPSHOCH-Exp5-ChIP-ES-CTCF-IP-Blobel-Rep2-S1_S2_MACS2_rendition_1E-8_downsampled_try3_peak_1419	1871	50.2703	187.185	182.415	265
chr1	91089362	91089807	Project004-IPSHOCH-Exp5-ChIP-ES-CTCF-IP-Blobel-Rep2-S1_S2_MACS2_rendition_1E-8_downsampled_try3_peak_1420	767	26.216	76.7808	73.6088	277
chr1	91092728	91093029	Project004-IPSHOCH-Exp5-ChIP-ES-CTCF-IP-Blobel-Rep2-S1_S2_MACS2_rendition_1E-8_downsampled_try3_peak_1421	846	25.4207	84.6932	81.4156	130
chr1	91103888	91104205	Project004-IPSHOCH-Exp5-ChIP-ES-CTCF-IP-Blobel-Rep2-S1_S2_MACS2_rendition_1E-8_downsampled_try3_peak_1422	333	15.3153	33.3743	30.7315	202
chr1	91131908	91132118	Project004-IPSHOCH-Exp5-ChIP-ES-CTCF-IP-Blobel-Rep2-S1_S2_MACS2_rendition_1E-8_downsampled_try3_peak_1423	191	9.32432	19.1965	16.75	110
chr1	91173108	91173432	Project004-IPSHOCH-Exp5-ChIP-ES-CTCF-IP-Blobel-Rep2-S1_S2_MACS2_rendition_1E-8_downsampled_try3_peak_1424	333	15.3153	33.3743	30.7315	180
chr1	91219623	91219993	Project004-IPSHOCH-Exp5-ChIP-ES-CTCF-IP-Blobel-Rep2-S1_S2_MACS2_rendition_1E-8_downsampled_try3_peak_1425	616	23.6054	61.687	58.7018	225
chr1	91239418	91239751	Project004-IPSHOCH-Exp5-ChIP-ES-CTCF-IP-Blobel-Rep2-S1_S2_MACS2_rendition_1E-8_downsampled_try3_peak_1426	870	31.6517	87.0398	83.7327	174
chr1	91241041	91241503	Project004-IPSHOCH-Exp5-ChIP-ES-CTCF-IP-Blobel-Rep2-S1_S2_MACS2_rendition_1E-8_downsampled_try3_peak_1427	1337	39.024	133.747	129.771	251
chr1	91251357	91251598	Project004-IPSHOCH-Exp5-ChIP-ES-CTCF-IP-Blobel-Rep2-S1_S2_MACS2_rendition_1E-8_downsampled_try3_peak_1428	224	10.9323	22.4309	19.9374	130
chr1	91261601	91261829	Project004-IPSHOCH-Exp5-ChIP-ES-CTCF-IP-Blobel-Rep2-S1_S2_MACS2_rendition_1E-8_downsampled_try3_peak_1429	164	7.5	16.4902	14.1	92
chr1	91420971	91421430	Project004-IPSHOCH-Exp5-ChIP-ES-CTCF-IP-Blobel-Rep2-S1_S2_MACS2_rendition_1E-8_downsampled_try3_peak_1430	1541	42.2877	154.116	149.831	195
chr1	91422450	91422822	Project004-IPSHOCH-Exp5-ChIP-ES-CTCF-IP-Blobel-Rep2-S1_S2_MACS2_rendition_1E-8_downsampled_try3_peak_1431	588	21.9613	58.882	55.9327	204
chr1	91476996	91477284	Project004-IPSHOCH-Exp5-ChIP-ES-CTCF-IP-Blobel-Rep2-S1_S2_MACS2_rendition_1E-8_downsampled_try3_peak_1432	216	8.13559	21.6982	19.2178	139
chr1	91477896	91478111	Project004-IPSHOCH-Exp5-ChIP-ES-CTCF-IP-Blobel-Rep2-S1_S2_MACS2_rendition_1E-8_downsampled_try3_peak_1433	355	11.373	35.5031	32.8327	89
chr1	91479983	91480297	Project004-IPSHOCH-Exp5-ChIP-ES-CTCF-IP-Blobel-Rep2-S1_S2_MACS2_rendition_1E-8_downsampled_try3_peak_1434	296	12.7341	29.6613	27.0657	155
chr1	91503156	91503639	Project004-IPSHOCH-Exp5-ChIP-ES-CTCF-IP-Blobel-Rep2-S1_S2_MACS2_rendition_1E-8_downsampled_try3_peak_1435	1245	41.8619	124.586	120.748	236
chr1	91524251	91524587	Project004-IPSHOCH-Exp5-ChIP-ES-CTCF-IP-Blobel-Rep2-S1_S2_MACS2_rendition_1E-8_downsampled_try3_peak_1436	775	28.2666	77.5458	74.3619	174
chr1	91528409	91528729	Project004-IPSHOCH-Exp5-ChIP-ES-CTCF-IP-Blobel-Rep2-S1_S2_MACS2_rendition_1E-8_downsampled_try3_peak_1437	1161	39.3905	116.153	112.443	139
chr1	91530605	91530999	Project004-IPSHOCH-Exp5-ChIP-ES-CTCF-IP-Blobel-Rep2-S1_S2_MACS2_rendition_1E-8_downsampled_try3_peak_1438	404	15.8108	40.4434	37.7123	235
chr1	91540394	91540694	Project004-IPSHOCH-Exp5-ChIP-ES-CTCF-IP-Blobel-Rep2-S1_S2_MACS2_rendition_1E-8_downsampled_try3_peak_1439	376	15	37.6044	34.9104	177
chr1	91543153	91543593	Project004-IPSHOCH-Exp5-ChIP-ES-CTCF-IP-Blobel-Rep2-S1_S2_MACS2_rendition_1E-8_downsampled_try3_peak_1440	1292	37.7027	129.225	125.316	211
chr1	91569670	91569833	Project004-IPSHOCH-Exp5-ChIP-ES-CTCF-IP-Blobel-Rep2-S1_S2_MACS2_rendition_1E-8_downsampled_try3_peak_1441	125	7.28819	12.5684	10.2558	107
chr1	91570317	91570577	Project004-IPSHOCH-Exp5-ChIP-ES-CTCF-IP-Blobel-Rep2-S1_S2_MACS2_rendition_1E-8_downsampled_try3_peak_1442	321	13.8237	32.1694	29.5389	133
chr1	91572903	91573330	Project004-IPSHOCH-Exp5-ChIP-ES-CTCF-IP-Blobel-Rep2-S1_S2_MACS2_rendition_1E-8_downsampled_try3_peak_1443	1358	38.3722	135.882	131.874	198
chr1	91627070	91627473	Project004-IPSHOCH-Exp5-ChIP-ES-CTCF-IP-Blobel-Rep2-S1_S2_MACS2_rendition_1E-8_downsampled_try3_peak_1444	539	21.952	53.9732	51.077	189
chr1	91649265	91649580	Project004-IPSHOCH-Exp5-ChIP-ES-CTCF-IP-Blobel-Rep2-S1_S2_MACS2_rendition_1E-8_downsampled_try3_peak_1445	623	18.75	62.3143	59.3228	155
chr1	91654034	91654550	Project004-IPSHOCH-Exp5-ChIP-ES-CTCF-IP-Blobel-Rep2-S1_S2_MACS2_rendition_1E-8_downsampled_try3_peak_1446	1364	39.3243	136.479	132.454	249
chr1	91666829	91667197	Project004-IPSHOCH-Exp5-ChIP-ES-CTCF-IP-Blobel-Rep2-S1_S2_MACS2_rendition_1E-8_downsampled_try3_peak_1447	658	20.6006	65.8404	62.8047	227
chr1	91717563	91717876	Project004-IPSHOCH-Exp5-ChIP-ES-CTCF-IP-Blobel-Rep2-S1_S2_MACS2_rendition_1E-8_downsampled_try3_peak_1448	537	19.4595	53.7338	50.8462	147
chr1	91738338	91738501	Project004-IPSHOCH-Exp5-ChIP-ES-CTCF-IP-Blobel-Rep2-S1_S2_MACS2_rendition_1E-8_downsampled_try3_peak_1449	140	8.16817	14.0041	11.6555	69
chr1	91740606	91741022	Project004-IPSHOCH-Exp5-ChIP-ES-CTCF-IP-Blobel-Rep2-S1_S2_MACS2_rendition_1E-8_downsampled_try3_peak_1450	823	26.7568	82.3854	79.1371	216
chr1	91755779	91756268	Project004-IPSHOCH-Exp5-ChIP-ES-CTCF-IP-Blobel-Rep2-S1_S2_MACS2_rendition_1E-8_downsampled_try3_peak_1451	1124	25.4237	112.495	108.837	205
chr1	91756902	91757209	Project004-IPSHOCH-Exp5-ChIP-ES-CTCF-IP-Blobel-Rep2-S1_S2_MACS2_rendition_1E-8_downsampled_try3_peak_1452	436	11.7857	43.6318	40.8641	183
chr1	91819535	91819710	Project004-IPSHOCH-Exp5-ChIP-ES-CTCF-IP-Blobel-Rep2-S1_S2_MACS2_rendition_1E-8_downsampled_try3_peak_1453	185	9.26459	18.581	16.1512	91
chr1	91835726	91836184	Project004-IPSHOCH-Exp5-ChIP-ES-CTCF-IP-Blobel-Rep2-S1_S2_MACS2_rendition_1E-8_downsampled_try3_peak_1454	1198	34.8482	119.847	116.081	270
chr1	91836994	91837366	Project004-IPSHOCH-Exp5-ChIP-ES-CTCF-IP-Blobel-Rep2-S1_S2_MACS2_rendition_1E-8_downsampled_try3_peak_1455	1246	31.25	124.674	120.831	183
chr1	91839775	91840384	Project004-IPSHOCH-Exp5-ChIP-ES-CTCF-IP-Blobel-Rep2-S1_S2_MACS2_rendition_1E-8_downsampled_try3_peak_1456	873	27.4087	87.3434	84.033	210
chr1	91840538	91840701	Project004-IPSHOCH-Exp5-ChIP-ES-CTCF-IP-Blobel-Rep2-S1_S2_MACS2_rendition_1E-8_downsampled_try3_peak_1457	108	6.26485	10.8912	8.61956	32
chr1	91909161	91910212	Project004-IPSHOCH-Exp5-ChIP-ES-CTCF-IP-Blobel-Rep2-S1_S2_MACS2_rendition_1E-8_downsampled_try3_peak_1458	1130	38.7988	113.074	109.407	467
chr1	91923538	91923899	Project004-IPSHOCH-Exp5-ChIP-ES-CTCF-IP-Blobel-Rep2-S1_S2_MACS2_rendition_1E-8_downsampled_try3_peak_1459	941	29.5946	94.1364	90.7333	154
chr1	91947995	91948390	Project004-IPSHOCH-Exp5-ChIP-ES-CTCF-IP-Blobel-Rep2-S1_S2_MACS2_rendition_1E-8_downsampled_try3_peak_1460	892	24.375	89.2882	85.9475	169
chr1	91957159	91957469	Project004-IPSHOCH-Exp5-ChIP-ES-CTCF-IP-Blobel-Rep2-S1_S2_MACS2_rendition_1E-8_downsampled_try3_peak_1461	594	10.921	59.4048	56.4483	173
chr1	92049718	92049981	Project004-IPSHOCH-Exp5-ChIP-ES-CTCF-IP-Blobel-Rep2-S1_S2_MACS2_rendition_1E-8_downsampled_try3_peak_1462	216	8.13559	21.6982	19.2178	141
chr1	92056105	92056349	Project004-IPSHOCH-Exp5-ChIP-ES-CTCF-IP-Blobel-Rep2-S1_S2_MACS2_rendition_1E-8_downsampled_try3_peak_1463	253	10	25.3882	22.8526	141
chr1	92056509	92056867	Project004-IPSHOCH-Exp5-ChIP-ES-CTCF-IP-Blobel-Rep2-S1_S2_MACS2_rendition_1E-8_downsampled_try3_peak_1464	695	23.1016	69.511	66.4275	148
chr1	92089870	92090084	Project004-IPSHOCH-Exp5-ChIP-ES-CTCF-IP-Blobel-Rep2-S1_S2_MACS2_rendition_1E-8_downsampled_try3_peak_1465	232	11.7417	23.2312	20.7218	118
chr1	92100340	92100699	Project004-IPSHOCH-Exp5-ChIP-ES-CTCF-IP-Blobel-Rep2-S1_S2_MACS2_rendition_1E-8_downsampled_try3_peak_1466	908	22.8667	90.8717	87.5088	200
chr1	92101921	92102175	Project004-IPSHOCH-Exp5-ChIP-ES-CTCF-IP-Blobel-Rep2-S1_S2_MACS2_rendition_1E-8_downsampled_try3_peak_1467	462	17.4071	46.207	43.408	129
chr1	92169119	92169372	Project004-IPSHOCH-Exp5-ChIP-ES-CTCF-IP-Blobel-Rep2-S1_S2_MACS2_rendition_1E-8_downsampled_try3_peak_1468	348	14.1892	34.8116	32.1534	136
chr1	92178371	92178576	Project004-IPSHOCH-Exp5-ChIP-ES-CTCF-IP-Blobel-Rep2-S1_S2_MACS2_rendition_1E-8_downsampled_try3_peak_1469	134	7.2973	13.4146	11.0819	78
chr1	92187870	92188101	Project004-IPSHOCH-Exp5-ChIP-ES-CTCF-IP-Blobel-Rep2-S1_S2_MACS2_rendition_1E-8_downsampled_try3_peak_1470	175	7.8125	17.5473	15.1358	105
chr1	92265959	92266206	Project004-IPSHOCH-Exp5-ChIP-ES-CTCF-IP-Blobel-Rep2-S1_S2_MACS2_rendition_1E-8_downsampled_try3_peak_1471	232	11.7417	23.2312	20.7218	96
chr1	92269379	92269634	Project004-IPSHOCH-Exp5-ChIP-ES-CTCF-IP-Blobel-Rep2-S1_S2_MACS2_rendition_1E-8_downsampled_try3_peak_1472	175	7.8125	17.5473	15.1358	124
chr1	92367100	92367303	Project004-IPSHOCH-Exp5-ChIP-ES-CTCF-IP-Blobel-Rep2-S1_S2_MACS2_rendition_1E-8_downsampled_try3_peak_1473	184	8.59291	18.4533	16.0246	74
chr1	92368432	92368721	Project004-IPSHOCH-Exp5-ChIP-ES-CTCF-IP-Blobel-Rep2-S1_S2_MACS2_rendition_1E-8_downsampled_try3_peak_1474	433	16.6216	43.3264	40.5603	129
chr1	92375520	92375725	Project004-IPSHOCH-Exp5-ChIP-ES-CTCF-IP-Blobel-Rep2-S1_S2_MACS2_rendition_1E-8_downsampled_try3_peak_1475	196	7.62712	19.6337	17.1839	92
chr1	92453694	92454135	Project004-IPSHOCH-Exp5-ChIP-ES-CTCF-IP-Blobel-Rep2-S1_S2_MACS2_rendition_1E-8_downsampled_try3_peak_1476	1044	32.027	104.44	100.893	240
chr1	92474085	92474301	Project004-IPSHOCH-Exp5-ChIP-ES-CTCF-IP-Blobel-Rep2-S1_S2_MACS2_rendition_1E-8_downsampled_try3_peak_1477	211	10.4768	21.1272	18.6534	146
chr1	92484921	92485334	Project004-IPSHOCH-Exp5-ChIP-ES-CTCF-IP-Blobel-Rep2-S1_S2_MACS2_rendition_1E-8_downsampled_try3_peak_1478	1167	34.8649	116.709	112.989	213
chr1	92487460	92487786	Project004-IPSHOCH-Exp5-ChIP-ES-CTCF-IP-Blobel-Rep2-S1_S2_MACS2_rendition_1E-8_downsampled_try3_peak_1479	695	20.3125	69.5996	66.5135	116
chr1	92489389	92489860	Project004-IPSHOCH-Exp5-ChIP-ES-CTCF-IP-Blobel-Rep2-S1_S2_MACS2_rendition_1E-8_downsampled_try3_peak_1480	1718	47.027	171.868	167.313	228
chr1	92547249	92547634	Project004-IPSHOCH-Exp5-ChIP-ES-CTCF-IP-Blobel-Rep2-S1_S2_MACS2_rendition_1E-8_downsampled_try3_peak_1481	1026	27.2877	102.69	99.1723	161
chr1	92690029	92690239	Project004-IPSHOCH-Exp5-ChIP-ES-CTCF-IP-Blobel-Rep2-S1_S2_MACS2_rendition_1E-8_downsampled_try3_peak_1482	246	12.2523	24.6304	22.1021	96
chr1	92726610	92726935	Project004-IPSHOCH-Exp5-ChIP-ES-CTCF-IP-Blobel-Rep2-S1_S2_MACS2_rendition_1E-8_downsampled_try3_peak_1483	293	12.5676	29.3754	26.781	140
chr1	92736892	92737231	Project004-IPSHOCH-Exp5-ChIP-ES-CTCF-IP-Blobel-Rep2-S1_S2_MACS2_rendition_1E-8_downsampled_try3_peak_1484	867	26.5573	86.7694	83.468	132
chr1	92746425	92746826	Project004-IPSHOCH-Exp5-ChIP-ES-CTCF-IP-Blobel-Rep2-S1_S2_MACS2_rendition_1E-8_downsampled_try3_peak_1485	506	20.9309	50.6795	47.8272	247
chr1	92768635	92768948	Project004-IPSHOCH-Exp5-ChIP-ES-CTCF-IP-Blobel-Rep2-S1_S2_MACS2_rendition_1E-8_downsampled_try3_peak_1486	518	20.7149	51.8732	49.0083	128
chr1	92802861	92803295	Project004-IPSHOCH-Exp5-ChIP-ES-CTCF-IP-Blobel-Rep2-S1_S2_MACS2_rendition_1E-8_downsampled_try3_peak_1487	1027	31.6216	102.709	99.1861	259
chr1	92806604	92806799	Project004-IPSHOCH-Exp5-ChIP-ES-CTCF-IP-Blobel-Rep2-S1_S2_MACS2_rendition_1E-8_downsampled_try3_peak_1488	262	12.5253	26.2302	23.6804	68
chr1	92825057	92825444	Project004-IPSHOCH-Exp5-ChIP-ES-CTCF-IP-Blobel-Rep2-S1_S2_MACS2_rendition_1E-8_downsampled_try3_peak_1489	1034	27.1875	103.477	99.9463	210
chr1	92852941	92853135	Project004-IPSHOCH-Exp5-ChIP-ES-CTCF-IP-Blobel-Rep2-S1_S2_MACS2_rendition_1E-8_downsampled_try3_peak_1490	127	7.65766	12.7801	10.457	70
chr1	92853281	92853705	Project004-IPSHOCH-Exp5-ChIP-ES-CTCF-IP-Blobel-Rep2-S1_S2_MACS2_rendition_1E-8_downsampled_try3_peak_1491	686	16.0714	68.6452	65.5754	214
chr1	92869806	92870192	Project004-IPSHOCH-Exp5-ChIP-ES-CTCF-IP-Blobel-Rep2-S1_S2_MACS2_rendition_1E-8_downsampled_try3_peak_1492	1582	40.8163	158.269	153.917	225
chr1	92917890	92918251	Project004-IPSHOCH-Exp5-ChIP-ES-CTCF-IP-Blobel-Rep2-S1_S2_MACS2_rendition_1E-8_downsampled_try3_peak_1493	710	27.0571	71.0074	67.9055	175
chr1	92934675	92934891	Project004-IPSHOCH-Exp5-ChIP-ES-CTCF-IP-Blobel-Rep2-S1_S2_MACS2_rendition_1E-8_downsampled_try3_peak_1494	242	12.0474	24.2884	21.7676	100
chr1	92995432	92995911	Project004-IPSHOCH-Exp5-ChIP-ES-CTCF-IP-Blobel-Rep2-S1_S2_MACS2_rendition_1E-8_downsampled_try3_peak_1495	1415	44.802	141.574	137.479	303
chr1	93004211	93004443	Project004-IPSHOCH-Exp5-ChIP-ES-CTCF-IP-Blobel-Rep2-S1_S2_MACS2_rendition_1E-8_downsampled_try3_peak_1496	392	15.9836	39.2959	36.5806	104
chr1	93025489	93025808	Project004-IPSHOCH-Exp5-ChIP-ES-CTCF-IP-Blobel-Rep2-S1_S2_MACS2_rendition_1E-8_downsampled_try3_peak_1497	442	18.8889	44.2197	41.4423	144
chr1	93075625	93075965	Project004-IPSHOCH-Exp5-ChIP-ES-CTCF-IP-Blobel-Rep2-S1_S2_MACS2_rendition_1E-8_downsampled_try3_peak_1498	643	19.7885	64.3117	61.2955	186
chr1	93107749	93108108	Project004-IPSHOCH-Exp5-ChIP-ES-CTCF-IP-Blobel-Rep2-S1_S2_MACS2_rendition_1E-8_downsampled_try3_peak_1499	767	23.6305	76.7665	73.5945	192
chr1	93135741	93136060	Project004-IPSHOCH-Exp5-ChIP-ES-CTCF-IP-Blobel-Rep2-S1_S2_MACS2_rendition_1E-8_downsampled_try3_peak_1500	682	25.9471	68.2425	65.1759	137
chr1	93148628	93148966	Project004-IPSHOCH-Exp5-ChIP-ES-CTCF-IP-Blobel-Rep2-S1_S2_MACS2_rendition_1E-8_downsampled_try3_peak_1501	554	21.4201	55.4792	52.5698	127
chr1	93243328	93243896	Project004-IPSHOCH-Exp5-ChIP-ES-CTCF-IP-Blobel-Rep2-S1_S2_MACS2_rendition_1E-8_downsampled_try3_peak_1502	1438	40.946	143.806	139.674	362
chr1	93262802	93263259	Project004-IPSHOCH-Exp5-ChIP-ES-CTCF-IP-Blobel-Rep2-S1_S2_MACS2_rendition_1E-8_downsampled_try3_peak_1503	1185	19.8913	118.537	114.79	150
chr1	93277084	93277474	Project004-IPSHOCH-Exp5-ChIP-ES-CTCF-IP-Blobel-Rep2-S1_S2_MACS2_rendition_1E-8_downsampled_try3_peak_1504	1212	38.6842	121.251	117.464	183
chr1	93286734	93286952	Project004-IPSHOCH-Exp5-ChIP-ES-CTCF-IP-Blobel-Rep2-S1_S2_MACS2_rendition_1E-8_downsampled_try3_peak_1505	158	8.21558	15.8451	13.4606	77
chr1	93325169	93325576	Project004-IPSHOCH-Exp5-ChIP-ES-CTCF-IP-Blobel-Rep2-S1_S2_MACS2_rendition_1E-8_downsampled_try3_peak_1506	1168	39.8198	116.889	113.16	212
chr1	93344227	93344423	Project004-IPSHOCH-Exp5-ChIP-ES-CTCF-IP-Blobel-Rep2-S1_S2_MACS2_rendition_1E-8_downsampled_try3_peak_1507	191	9.32432	19.1965	16.75	110
chr1	93355991	93356215	Project004-IPSHOCH-Exp5-ChIP-ES-CTCF-IP-Blobel-Rep2-S1_S2_MACS2_rendition_1E-8_downsampled_try3_peak_1508	266	10.0275	26.6081	24.0548	97
chr1	93375615	93375852	Project004-IPSHOCH-Exp5-ChIP-ES-CTCF-IP-Blobel-Rep2-S1_S2_MACS2_rendition_1E-8_downsampled_try3_peak_1509	179	8.91892	17.9999	15.5739	99
chr1	93379815	93380291	Project004-IPSHOCH-Exp5-ChIP-ES-CTCF-IP-Blobel-Rep2-S1_S2_MACS2_rendition_1E-8_downsampled_try3_peak_1510	710	20.625	71.0769	67.9713	280
chr1	93411567	93411804	Project004-IPSHOCH-Exp5-ChIP-ES-CTCF-IP-Blobel-Rep2-S1_S2_MACS2_rendition_1E-8_downsampled_try3_peak_1511	232	11.7417	23.2312	20.7218	113
chr1	93420332	93420707	Project004-IPSHOCH-Exp5-ChIP-ES-CTCF-IP-Blobel-Rep2-S1_S2_MACS2_rendition_1E-8_downsampled_try3_peak_1512	1274	37.2973	127.422	123.541	186
chr1	93430970	93431272	Project004-IPSHOCH-Exp5-ChIP-ES-CTCF-IP-Blobel-Rep2-S1_S2_MACS2_rendition_1E-8_downsampled_try3_peak_1513	499	14.2373	49.9306	47.086	146
chr1	93470827	93471118	Project004-IPSHOCH-Exp5-ChIP-ES-CTCF-IP-Blobel-Rep2-S1_S2_MACS2_rendition_1E-8_downsampled_try3_peak_1514	598	21.0811	59.8822	56.9181	140
chr1	93497302	93497649	Project004-IPSHOCH-Exp5-ChIP-ES-CTCF-IP-Blobel-Rep2-S1_S2_MACS2_rendition_1E-8_downsampled_try3_peak_1515	503	15.8966	50.3494	47.5024	172
chr1	93579168	93579371	Project004-IPSHOCH-Exp5-ChIP-ES-CTCF-IP-Blobel-Rep2-S1_S2_MACS2_rendition_1E-8_downsampled_try3_peak_1516	304	13.5914	30.4764	27.8697	104
chr1	93586170	93586423	Project004-IPSHOCH-Exp5-ChIP-ES-CTCF-IP-Blobel-Rep2-S1_S2_MACS2_rendition_1E-8_downsampled_try3_peak_1517	364	16.3363	36.4081	33.724	130
chr1	93651737	93652092	Project004-IPSHOCH-Exp5-ChIP-ES-CTCF-IP-Blobel-Rep2-S1_S2_MACS2_rendition_1E-8_downsampled_try3_peak_1518	727	18.5593	72.7893	69.6608	119
chr1	93704437	93704700	Project004-IPSHOCH-Exp5-ChIP-ES-CTCF-IP-Blobel-Rep2-S1_S2_MACS2_rendition_1E-8_downsampled_try3_peak_1519	309	12.017	30.9648	28.3518	95
chr1	93714391	93714583	Project004-IPSHOCH-Exp5-ChIP-ES-CTCF-IP-Blobel-Rep2-S1_S2_MACS2_rendition_1E-8_downsampled_try3_peak_1520	207	10.5983	20.7991	18.3293	98
chr1	93715873	93716241	Project004-IPSHOCH-Exp5-ChIP-ES-CTCF-IP-Blobel-Rep2-S1_S2_MACS2_rendition_1E-8_downsampled_try3_peak_1521	474	19.9099	47.4277	44.6113	119
chr1	93771261	93771733	Project004-IPSHOCH-Exp5-ChIP-ES-CTCF-IP-Blobel-Rep2-S1_S2_MACS2_rendition_1E-8_downsampled_try3_peak_1522	1079	32.8378	107.919	104.321	175
chr1	93793694	93794012	Project004-IPSHOCH-Exp5-ChIP-ES-CTCF-IP-Blobel-Rep2-S1_S2_MACS2_rendition_1E-8_downsampled_try3_peak_1523	490	20.4204	49.0482	46.2139	158
chr1	93810401	93810846	Project004-IPSHOCH-Exp5-ChIP-ES-CTCF-IP-Blobel-Rep2-S1_S2_MACS2_rendition_1E-8_downsampled_try3_peak_1524	1493	42.1622	149.345	145.129	171
chr1	93858863	93859195	Project004-IPSHOCH-Exp5-ChIP-ES-CTCF-IP-Blobel-Rep2-S1_S2_MACS2_rendition_1E-8_downsampled_try3_peak_1525	929	22.1186	92.9226	89.5334	151
chr1	93865620	93865992	Project004-IPSHOCH-Exp5-ChIP-ES-CTCF-IP-Blobel-Rep2-S1_S2_MACS2_rendition_1E-8_downsampled_try3_peak_1526	643	23.6866	64.3864	61.369	158
chr1	93914443	93914718	Project004-IPSHOCH-Exp5-ChIP-ES-CTCF-IP-Blobel-Rep2-S1_S2_MACS2_rendition_1E-8_downsampled_try3_peak_1527	208	8.75	20.8176	18.3458	118
chr1	94018839	94019160	Project004-IPSHOCH-Exp5-ChIP-ES-CTCF-IP-Blobel-Rep2-S1_S2_MACS2_rendition_1E-8_downsampled_try3_peak_1528	349	14.6877	34.9826	32.3166	158
chr1	94074985	94075226	Project004-IPSHOCH-Exp5-ChIP-ES-CTCF-IP-Blobel-Rep2-S1_S2_MACS2_rendition_1E-8_downsampled_try3_peak_1529	307	12.973	30.7148	28.1028	106
chr1	94172032	94172303	Project004-IPSHOCH-Exp5-ChIP-ES-CTCF-IP-Blobel-Rep2-S1_S2_MACS2_rendition_1E-8_downsampled_try3_peak_1530	280	12.1622	28.0497	25.4743	152
chr1	94256843	94257371	Project004-IPSHOCH-Exp5-ChIP-ES-CTCF-IP-Blobel-Rep2-S1_S2_MACS2_rendition_1E-8_downsampled_try3_peak_1531	1147	29.375	114.794	111.104	242
chr1	94350206	94350733	Project004-IPSHOCH-Exp5-ChIP-ES-CTCF-IP-Blobel-Rep2-S1_S2_MACS2_rendition_1E-8_downsampled_try3_peak_1532	1045	35.0435	104.594	101.045	328
chr1	94417878	94418265	Project004-IPSHOCH-Exp5-ChIP-ES-CTCF-IP-Blobel-Rep2-S1_S2_MACS2_rendition_1E-8_downsampled_try3_peak_1533	1245	41.8619	124.586	120.748	201
chr1	94507578	94507967	Project004-IPSHOCH-Exp5-ChIP-ES-CTCF-IP-Blobel-Rep2-S1_S2_MACS2_rendition_1E-8_downsampled_try3_peak_1534	943	22.3729	94.3999	90.9892	207
chr1	94511173	94511427	Project004-IPSHOCH-Exp5-ChIP-ES-CTCF-IP-Blobel-Rep2-S1_S2_MACS2_rendition_1E-8_downsampled_try3_peak_1535	376	13.125	37.6986	35.0025	126
chr1	94529534	94529892	Project004-IPSHOCH-Exp5-ChIP-ES-CTCF-IP-Blobel-Rep2-S1_S2_MACS2_rendition_1E-8_downsampled_try3_peak_1536	378	16.3792	37.845	35.1468	123
chr1	94544389	94544822	Project004-IPSHOCH-Exp5-ChIP-ES-CTCF-IP-Blobel-Rep2-S1_S2_MACS2_rendition_1E-8_downsampled_try3_peak_1537	1486	41.1131	148.602	144.397	145
chr1	94545294	94545788	Project004-IPSHOCH-Exp5-ChIP-ES-CTCF-IP-Blobel-Rep2-S1_S2_MACS2_rendition_1E-8_downsampled_try3_peak_1538	1504	44.063	150.422	146.19	249
chr1	94593445	94593877	Project004-IPSHOCH-Exp5-ChIP-ES-CTCF-IP-Blobel-Rep2-S1_S2_MACS2_rendition_1E-8_downsampled_try3_peak_1539	1002	26.5625	100.288	96.7991	162
chr1	94604547	94604828	Project004-IPSHOCH-Exp5-ChIP-ES-CTCF-IP-Blobel-Rep2-S1_S2_MACS2_rendition_1E-8_downsampled_try3_peak_1540	407	16.8539	40.7769	38.044	125
chr1	94730527	94730952	Project004-IPSHOCH-Exp5-ChIP-ES-CTCF-IP-Blobel-Rep2-S1_S2_MACS2_rendition_1E-8_downsampled_try3_peak_1541	1775	48.2432	177.584	172.948	246
chr1	94746133	94746413	Project004-IPSHOCH-Exp5-ChIP-ES-CTCF-IP-Blobel-Rep2-S1_S2_MACS2_rendition_1E-8_downsampled_try3_peak_1542	267	11.7568	26.7382	24.1807	113
chr1	94791595	94792051	Project004-IPSHOCH-Exp5-ChIP-ES-CTCF-IP-Blobel-Rep2-S1_S2_MACS2_rendition_1E-8_downsampled_try3_peak_1543	1217	26.9491	121.781	117.987	244
chr1	94803423	94803819	Project004-IPSHOCH-Exp5-ChIP-ES-CTCF-IP-Blobel-Rep2-S1_S2_MACS2_rendition_1E-8_downsampled_try3_peak_1544	688	19.0872	68.8553	65.7842	140
chr1	94805659	94805972	Project004-IPSHOCH-Exp5-ChIP-ES-CTCF-IP-Blobel-Rep2-S1_S2_MACS2_rendition_1E-8_downsampled_try3_peak_1545	742	24.2763	74.2931	71.1504	162
chr1	94807144	94807499	Project004-IPSHOCH-Exp5-ChIP-ES-CTCF-IP-Blobel-Rep2-S1_S2_MACS2_rendition_1E-8_downsampled_try3_peak_1546	966	21.7628	96.6666	93.2289	184
chr1	94846050	94846337	Project004-IPSHOCH-Exp5-ChIP-ES-CTCF-IP-Blobel-Rep2-S1_S2_MACS2_rendition_1E-8_downsampled_try3_peak_1547	727	27.5676	72.7582	69.6309	162
chr1	94853220	94853575	Project004-IPSHOCH-Exp5-ChIP-ES-CTCF-IP-Blobel-Rep2-S1_S2_MACS2_rendition_1E-8_downsampled_try3_peak_1548	658	17.2881	65.8689	62.8321	143
chr1	94881637	94881817	Project004-IPSHOCH-Exp5-ChIP-ES-CTCF-IP-Blobel-Rep2-S1_S2_MACS2_rendition_1E-8_downsampled_try3_peak_1549	173	9.11023	17.3301	14.9216	96
chr1	94907210	94907668	Project004-IPSHOCH-Exp5-ChIP-ES-CTCF-IP-Blobel-Rep2-S1_S2_MACS2_rendition_1E-8_downsampled_try3_peak_1550	798	29.6096	79.8396	76.6257	226
chr1	94910934	94911500	Project004-IPSHOCH-Exp5-ChIP-ES-CTCF-IP-Blobel-Rep2-S1_S2_MACS2_rendition_1E-8_downsampled_try3_peak_1551	899	21.6102	89.9829	86.6372	288
chr1	94977497	94977910	Project004-IPSHOCH-Exp5-ChIP-ES-CTCF-IP-Blobel-Rep2-S1_S2_MACS2_rendition_1E-8_downsampled_try3_peak_1552	870	21.1017	87.0636	83.7552	219
chr1	94988334	94988580	Project004-IPSHOCH-Exp5-ChIP-ES-CTCF-IP-Blobel-Rep2-S1_S2_MACS2_rendition_1E-8_downsampled_try3_peak_1553	474	19.9099	47.4277	44.6113	119
chr1	95025297	95025648	Project004-IPSHOCH-Exp5-ChIP-ES-CTCF-IP-Blobel-Rep2-S1_S2_MACS2_rendition_1E-8_downsampled_try3_peak_1554	1009	31.2162	100.983	97.4847	160
chr1	95049643	95049809	Project004-IPSHOCH-Exp5-ChIP-ES-CTCF-IP-Blobel-Rep2-S1_S2_MACS2_rendition_1E-8_downsampled_try3_peak_1555	152	8.67868	15.2542	12.8807	90
chr1	95070952	95071386	Project004-IPSHOCH-Exp5-ChIP-ES-CTCF-IP-Blobel-Rep2-S1_S2_MACS2_rendition_1E-8_downsampled_try3_peak_1556	1522	41.8962	152.274	148.012	201
chr1	95120527	95120949	Project004-IPSHOCH-Exp5-ChIP-ES-CTCF-IP-Blobel-Rep2-S1_S2_MACS2_rendition_1E-8_downsampled_try3_peak_1557	2105	55.1351	210.575	205.514	233
chr1	95133187	95133443	Project004-IPSHOCH-Exp5-ChIP-ES-CTCF-IP-Blobel-Rep2-S1_S2_MACS2_rendition_1E-8_downsampled_try3_peak_1558	406	10.3704	40.6946	37.9631	132
chr1	95134884	95135103	Project004-IPSHOCH-Exp5-ChIP-ES-CTCF-IP-Blobel-Rep2-S1_S2_MACS2_rendition_1E-8_downsampled_try3_peak_1559	244	11.091	24.407	21.8855	131
chr1	95211480	95211697	Project004-IPSHOCH-Exp5-ChIP-ES-CTCF-IP-Blobel-Rep2-S1_S2_MACS2_rendition_1E-8_downsampled_try3_peak_1560	318	14.8048	31.8784	29.254	116
chr1	95275696	95276072	Project004-IPSHOCH-Exp5-ChIP-ES-CTCF-IP-Blobel-Rep2-S1_S2_MACS2_rendition_1E-8_downsampled_try3_peak_1561	357	15.9674	35.7863	33.1148	235
chr1	95296633	95296885	Project004-IPSHOCH-Exp5-ChIP-ES-CTCF-IP-Blobel-Rep2-S1_S2_MACS2_rendition_1E-8_downsampled_try3_peak_1562	453	18.2205	45.3184	42.5303	112
chr1	95346733	95346964	Project004-IPSHOCH-Exp5-ChIP-ES-CTCF-IP-Blobel-Rep2-S1_S2_MACS2_rendition_1E-8_downsampled_try3_peak_1563	397	16.6707	39.7469	37.0236	96
chr1	95403692	95404109	Project004-IPSHOCH-Exp5-ChIP-ES-CTCF-IP-Blobel-Rep2-S1_S2_MACS2_rendition_1E-8_downsampled_try3_peak_1564	398	14.6796	39.8874	37.1638	121
chr1	95439893	95440142	Project004-IPSHOCH-Exp5-ChIP-ES-CTCF-IP-Blobel-Rep2-S1_S2_MACS2_rendition_1E-8_downsampled_try3_peak_1565	235	11.6288	23.5908	21.0793	142
chr1	95490574	95490871	Project004-IPSHOCH-Exp5-ChIP-ES-CTCF-IP-Blobel-Rep2-S1_S2_MACS2_rendition_1E-8_downsampled_try3_peak_1566	577	15.7627	57.7747	54.8369	135
chr1	95499611	95499792	Project004-IPSHOCH-Exp5-ChIP-ES-CTCF-IP-Blobel-Rep2-S1_S2_MACS2_rendition_1E-8_downsampled_try3_peak_1567	230	11.3015	23.0459	20.5458	104
chr1	95545372	95545601	Project004-IPSHOCH-Exp5-ChIP-ES-CTCF-IP-Blobel-Rep2-S1_S2_MACS2_rendition_1E-8_downsampled_try3_peak_1568	367	14.4875	36.7125	34.0247	107
chr1	95557929	95558141	Project004-IPSHOCH-Exp5-ChIP-ES-CTCF-IP-Blobel-Rep2-S1_S2_MACS2_rendition_1E-8_downsampled_try3_peak_1569	310	13.1449	31.0104	28.3969	88
chr1	95564473	95564643	Project004-IPSHOCH-Exp5-ChIP-ES-CTCF-IP-Blobel-Rep2-S1_S2_MACS2_rendition_1E-8_downsampled_try3_peak_1570	161	8.42235	16.1901	13.8035	116
chr1	95565294	95565584	Project004-IPSHOCH-Exp5-ChIP-ES-CTCF-IP-Blobel-Rep2-S1_S2_MACS2_rendition_1E-8_downsampled_try3_peak_1571	617	16.5254	61.792	58.8049	137
chr1	95622851	95623073	Project004-IPSHOCH-Exp5-ChIP-ES-CTCF-IP-Blobel-Rep2-S1_S2_MACS2_rendition_1E-8_downsampled_try3_peak_1572	277	10.625	27.7551	25.1846	98
chr1	95623601	95624064	Project004-IPSHOCH-Exp5-ChIP-ES-CTCF-IP-Blobel-Rep2-S1_S2_MACS2_rendition_1E-8_downsampled_try3_peak_1573	1592	48.5022	159.265	154.897	161
chr1	95639422	95639842	Project004-IPSHOCH-Exp5-ChIP-ES-CTCF-IP-Blobel-Rep2-S1_S2_MACS2_rendition_1E-8_downsampled_try3_peak_1574	661	22.7027	66.1629	63.12	260
chr1	95698451	95698634	Project004-IPSHOCH-Exp5-ChIP-ES-CTCF-IP-Blobel-Rep2-S1_S2_MACS2_rendition_1E-8_downsampled_try3_peak_1575	134	6.5625	13.4274	11.0925	62
chr1	95700129	95700630	Project004-IPSHOCH-Exp5-ChIP-ES-CTCF-IP-Blobel-Rep2-S1_S2_MACS2_rendition_1E-8_downsampled_try3_peak_1576	2110	43.8721	211.018	205.955	291
chr1	95707492	95707668	Project004-IPSHOCH-Exp5-ChIP-ES-CTCF-IP-Blobel-Rep2-S1_S2_MACS2_rendition_1E-8_downsampled_try3_peak_1577	151	7.83106	15.1991	12.8341	71
chr1	95723990	95724505	Project004-IPSHOCH-Exp5-ChIP-ES-CTCF-IP-Blobel-Rep2-S1_S2_MACS2_rendition_1E-8_downsampled_try3_peak_1578	496	15.9375	49.6638	46.8215	387
chr1	95787589	95787936	Project004-IPSHOCH-Exp5-ChIP-ES-CTCF-IP-Blobel-Rep2-S1_S2_MACS2_rendition_1E-8_downsampled_try3_peak_1579	241	10.9459	24.1597	21.6411	108
chr1	95793962	95794309	Project004-IPSHOCH-Exp5-ChIP-ES-CTCF-IP-Blobel-Rep2-S1_S2_MACS2_rendition_1E-8_downsampled_try3_peak_1580	643	19.7885	64.3117	61.2955	161
chr1	95797012	95797186	Project004-IPSHOCH-Exp5-ChIP-ES-CTCF-IP-Blobel-Rep2-S1_S2_MACS2_rendition_1E-8_downsampled_try3_peak_1581	241	10.9459	24.1597	21.6411	78
chr1	95821741	95821978	Project004-IPSHOCH-Exp5-ChIP-ES-CTCF-IP-Blobel-Rep2-S1_S2_MACS2_rendition_1E-8_downsampled_try3_peak_1582	214	10.3678	21.4872	19.0119	129
chr1	95859522	95859711	Project004-IPSHOCH-Exp5-ChIP-ES-CTCF-IP-Blobel-Rep2-S1_S2_MACS2_rendition_1E-8_downsampled_try3_peak_1583	165	9.18919	16.529	14.131	70
chr1	95863068	95863411	Project004-IPSHOCH-Exp5-ChIP-ES-CTCF-IP-Blobel-Rep2-S1_S2_MACS2_rendition_1E-8_downsampled_try3_peak_1584	758	25.1351	75.8121	72.6496	162
chr1	95866101	95866352	Project004-IPSHOCH-Exp5-ChIP-ES-CTCF-IP-Blobel-Rep2-S1_S2_MACS2_rendition_1E-8_downsampled_try3_peak_1585	364	16.3363	36.4081	33.724	112
chr1	95890347	95890563	Project004-IPSHOCH-Exp5-ChIP-ES-CTCF-IP-Blobel-Rep2-S1_S2_MACS2_rendition_1E-8_downsampled_try3_peak_1586	152	8.67868	15.2542	12.8807	54
chr1	95908291	95908550	Project004-IPSHOCH-Exp5-ChIP-ES-CTCF-IP-Blobel-Rep2-S1_S2_MACS2_rendition_1E-8_downsampled_try3_peak_1587	379	16.8468	37.9453	35.2413	156
chr1	95931447	95931878	Project004-IPSHOCH-Exp5-ChIP-ES-CTCF-IP-Blobel-Rep2-S1_S2_MACS2_rendition_1E-8_downsampled_try3_peak_1588	1319	38.6132	131.926	127.978	204
chr1	95975637	95976073	Project004-IPSHOCH-Exp5-ChIP-ES-CTCF-IP-Blobel-Rep2-S1_S2_MACS2_rendition_1E-8_downsampled_try3_peak_1589	1786	35.8475	178.645	173.993	238
chr1	96036018	96036359	Project004-IPSHOCH-Exp5-ChIP-ES-CTCF-IP-Blobel-Rep2-S1_S2_MACS2_rendition_1E-8_downsampled_try3_peak_1590	604	16.2712	60.4462	57.4774	186
chr1	97293801	97294028	Project004-IPSHOCH-Exp5-ChIP-ES-CTCF-IP-Blobel-Rep2-S1_S2_MACS2_rendition_1E-8_downsampled_try3_peak_1591	321	13.8237	32.1694	29.5389	84
chr1	97560932	97561192	Project004-IPSHOCH-Exp5-ChIP-ES-CTCF-IP-Blobel-Rep2-S1_S2_MACS2_rendition_1E-8_downsampled_try3_peak_1592	156	8.67136	15.6771	13.2948	135
chr1	97658784	97659160	Project004-IPSHOCH-Exp5-ChIP-ES-CTCF-IP-Blobel-Rep2-S1_S2_MACS2_rendition_1E-8_downsampled_try3_peak_1593	798	19.8305	79.8573	76.6421	231
chr1	98664889	98665107	Project004-IPSHOCH-Exp5-ChIP-ES-CTCF-IP-Blobel-Rep2-S1_S2_MACS2_rendition_1E-8_downsampled_try3_peak_1594	240	11.2317	24.0641	21.5491	143
chr1	98685876	98686172	Project004-IPSHOCH-Exp5-ChIP-ES-CTCF-IP-Blobel-Rep2-S1_S2_MACS2_rendition_1E-8_downsampled_try3_peak_1595	426	18.3784	42.633	39.8736	141
chr1	98698280	98698589	Project004-IPSHOCH-Exp5-ChIP-ES-CTCF-IP-Blobel-Rep2-S1_S2_MACS2_rendition_1E-8_downsampled_try3_peak_1596	472	12.4286	47.208	44.398	161
chr1	98743217	98743632	Project004-IPSHOCH-Exp5-ChIP-ES-CTCF-IP-Blobel-Rep2-S1_S2_MACS2_rendition_1E-8_downsampled_try3_peak_1597	812	20.0847	81.2878	78.0573	248
chr1	98915575	98915911	Project004-IPSHOCH-Exp5-ChIP-ES-CTCF-IP-Blobel-Rep2-S1_S2_MACS2_rendition_1E-8_downsampled_try3_peak_1598	939	25.3125	93.9706	90.5741	192
chr1	98935172	98935461	Project004-IPSHOCH-Exp5-ChIP-ES-CTCF-IP-Blobel-Rep2-S1_S2_MACS2_rendition_1E-8_downsampled_try3_peak_1599	362	11.4407	36.2919	33.6152	140
chr1	99143409	99143647	Project004-IPSHOCH-Exp5-ChIP-ES-CTCF-IP-Blobel-Rep2-S1_S2_MACS2_rendition_1E-8_downsampled_try3_peak_1600	260	12.7628	26.0473	23.4987	113
chr1	99543722	99543923	Project004-IPSHOCH-Exp5-ChIP-ES-CTCF-IP-Blobel-Rep2-S1_S2_MACS2_rendition_1E-8_downsampled_try3_peak_1601	334	14.5764	33.4436	30.7959	92
chr1	99585325	99585759	Project004-IPSHOCH-Exp5-ChIP-ES-CTCF-IP-Blobel-Rep2-S1_S2_MACS2_rendition_1E-8_downsampled_try3_peak_1602	834	30.6306	83.4254	80.1636	237
chr1	99623335	99623662	Project004-IPSHOCH-Exp5-ChIP-ES-CTCF-IP-Blobel-Rep2-S1_S2_MACS2_rendition_1E-8_downsampled_try3_peak_1603	523	21.4414	52.3213	49.4467	149
chr1	99666932	99667182	Project004-IPSHOCH-Exp5-ChIP-ES-CTCF-IP-Blobel-Rep2-S1_S2_MACS2_rendition_1E-8_downsampled_try3_peak_1604	215	8.86543	21.5678	19.0919	132
chr1	99681598	99681821	Project004-IPSHOCH-Exp5-ChIP-ES-CTCF-IP-Blobel-Rep2-S1_S2_MACS2_rendition_1E-8_downsampled_try3_peak_1605	280	12.1622	28.0497	25.4743	112
chr1	99690752	99690963	Project004-IPSHOCH-Exp5-ChIP-ES-CTCF-IP-Blobel-Rep2-S1_S2_MACS2_rendition_1E-8_downsampled_try3_peak_1606	238	8.64407	23.8159	21.3024	107
chr1	99699198	99699435	Project004-IPSHOCH-Exp5-ChIP-ES-CTCF-IP-Blobel-Rep2-S1_S2_MACS2_rendition_1E-8_downsampled_try3_peak_1607	334	13.7838	33.4333	30.7863	128
chr1	99706126	99706368	Project004-IPSHOCH-Exp5-ChIP-ES-CTCF-IP-Blobel-Rep2-S1_S2_MACS2_rendition_1E-8_downsampled_try3_peak_1608	318	14.8048	31.8784	29.254	125
chr1	99773630	99774056	Project004-IPSHOCH-Exp5-ChIP-ES-CTCF-IP-Blobel-Rep2-S1_S2_MACS2_rendition_1E-8_downsampled_try3_peak_1609	590	21.5995	59.0987	56.1436	177
chr1	99950214	99950377	Project004-IPSHOCH-Exp5-ChIP-ES-CTCF-IP-Blobel-Rep2-S1_S2_MACS2_rendition_1E-8_downsampled_try3_peak_1610	127	7.65766	12.7801	10.457	22
chr1	99968641	99969040	Project004-IPSHOCH-Exp5-ChIP-ES-CTCF-IP-Blobel-Rep2-S1_S2_MACS2_rendition_1E-8_downsampled_try3_peak_1611	770	21.875	77.0506	73.8727	209
chr1	100041514	100041766	Project004-IPSHOCH-Exp5-ChIP-ES-CTCF-IP-Blobel-Rep2-S1_S2_MACS2_rendition_1E-8_downsampled_try3_peak_1612	304	10.1695	30.4589	27.8523	101
chr1	100075677	100076076	Project004-IPSHOCH-Exp5-ChIP-ES-CTCF-IP-Blobel-Rep2-S1_S2_MACS2_rendition_1E-8_downsampled_try3_peak_1613	907	28.7838	90.7481	87.3883	153
chr1	100246931	100247349	Project004-IPSHOCH-Exp5-ChIP-ES-CTCF-IP-Blobel-Rep2-S1_S2_MACS2_rendition_1E-8_downsampled_try3_peak_1614	307	12.973	30.7148	28.1028	193
chr1	100288737	100288937	Project004-IPSHOCH-Exp5-ChIP-ES-CTCF-IP-Blobel-Rep2-S1_S2_MACS2_rendition_1E-8_downsampled_try3_peak_1615	178	9.6997	17.8272	15.4061	104
chr1	100336836	100337067	Project004-IPSHOCH-Exp5-ChIP-ES-CTCF-IP-Blobel-Rep2-S1_S2_MACS2_rendition_1E-8_downsampled_try3_peak_1616	303	14.2943	30.3973	27.7914	82
chr1	100420211	100420374	Project004-IPSHOCH-Exp5-ChIP-ES-CTCF-IP-Blobel-Rep2-S1_S2_MACS2_rendition_1E-8_downsampled_try3_peak_1617	144	6.875	14.4294	12.0758	115
chr1	100645527	100645785	Project004-IPSHOCH-Exp5-ChIP-ES-CTCF-IP-Blobel-Rep2-S1_S2_MACS2_rendition_1E-8_downsampled_try3_peak_1618	518	20.7149	51.8732	49.0083	147
chr1	101670764	101671012	Project004-IPSHOCH-Exp5-ChIP-ES-CTCF-IP-Blobel-Rep2-S1_S2_MACS2_rendition_1E-8_downsampled_try3_peak_1619	410	17.8679	41.0581	38.3178	141
chr1	102128619	102128810	Project004-IPSHOCH-Exp5-ChIP-ES-CTCF-IP-Blobel-Rep2-S1_S2_MACS2_rendition_1E-8_downsampled_try3_peak_1620	194	10.1166	19.4875	17.0388	99
chr1	102453524	102453854	Project004-IPSHOCH-Exp5-ChIP-ES-CTCF-IP-Blobel-Rep2-S1_S2_MACS2_rendition_1E-8_downsampled_try3_peak_1621	1135	32.542	113.588	109.908	159
chr1	102783982	102784230	Project004-IPSHOCH-Exp5-ChIP-ES-CTCF-IP-Blobel-Rep2-S1_S2_MACS2_rendition_1E-8_downsampled_try3_peak_1622	280	12.1622	28.0497	25.4743	138
chr1	103335472	103335687	Project004-IPSHOCH-Exp5-ChIP-ES-CTCF-IP-Blobel-Rep2-S1_S2_MACS2_rendition_1E-8_downsampled_try3_peak_1623	348	15.8258	34.8843	32.2196	95
chr1	103525645	103525918	Project004-IPSHOCH-Exp5-ChIP-ES-CTCF-IP-Blobel-Rep2-S1_S2_MACS2_rendition_1E-8_downsampled_try3_peak_1624	270	9.40678	27.0855	24.5258	142
chr1	104275183	104275533	Project004-IPSHOCH-Exp5-ChIP-ES-CTCF-IP-Blobel-Rep2-S1_S2_MACS2_rendition_1E-8_downsampled_try3_peak_1625	429	14.375	42.9238	40.1617	182
chr1	105036823	105036992	Project004-IPSHOCH-Exp5-ChIP-ES-CTCF-IP-Blobel-Rep2-S1_S2_MACS2_rendition_1E-8_downsampled_try3_peak_1626	152	8.67868	15.2542	12.8807	63
chr1	105235276	105235441	Project004-IPSHOCH-Exp5-ChIP-ES-CTCF-IP-Blobel-Rep2-S1_S2_MACS2_rendition_1E-8_downsampled_try3_peak_1627	185	9.56575	18.576	16.1463	107
chr1	105659416	105659690	Project004-IPSHOCH-Exp5-ChIP-ES-CTCF-IP-Blobel-Rep2-S1_S2_MACS2_rendition_1E-8_downsampled_try3_peak_1628	477	17.8378	47.7286	44.9083	140
chr1	105681383	105681679	Project004-IPSHOCH-Exp5-ChIP-ES-CTCF-IP-Blobel-Rep2-S1_S2_MACS2_rendition_1E-8_downsampled_try3_peak_1629	394	17.3574	39.4954	36.7734	129
chr1	105695935	105696252	Project004-IPSHOCH-Exp5-ChIP-ES-CTCF-IP-Blobel-Rep2-S1_S2_MACS2_rendition_1E-8_downsampled_try3_peak_1630	556	22.4625	55.6352	52.719	146
chr1	105883452	105883807	Project004-IPSHOCH-Exp5-ChIP-ES-CTCF-IP-Blobel-Rep2-S1_S2_MACS2_rendition_1E-8_downsampled_try3_peak_1631	338	12.1875	33.886	31.2347	176
chr1	106506004	106506378	Project004-IPSHOCH-Exp5-ChIP-ES-CTCF-IP-Blobel-Rep2-S1_S2_MACS2_rendition_1E-8_downsampled_try3_peak_1632	608	18.4375	60.8783	57.9004	188
chr1	106841384	106841667	Project004-IPSHOCH-Exp5-ChIP-ES-CTCF-IP-Blobel-Rep2-S1_S2_MACS2_rendition_1E-8_downsampled_try3_peak_1633	758	25.1351	75.8121	72.6496	162
chr1	106875743	106875968	Project004-IPSHOCH-Exp5-ChIP-ES-CTCF-IP-Blobel-Rep2-S1_S2_MACS2_rendition_1E-8_downsampled_try3_peak_1634	274	13.2733	27.4811	24.914	125
chr1	106882751	106883145	Project004-IPSHOCH-Exp5-ChIP-ES-CTCF-IP-Blobel-Rep2-S1_S2_MACS2_rendition_1E-8_downsampled_try3_peak_1635	1050	27.5	105.08	101.525	218
chr1	106989071	106989431	Project004-IPSHOCH-Exp5-ChIP-ES-CTCF-IP-Blobel-Rep2-S1_S2_MACS2_rendition_1E-8_downsampled_try3_peak_1636	677	23.1081	67.7527	64.6901	215
chr1	107259296	107259675	Project004-IPSHOCH-Exp5-ChIP-ES-CTCF-IP-Blobel-Rep2-S1_S2_MACS2_rendition_1E-8_downsampled_try3_peak_1637	857	27.5676	85.7116	82.4188	178
chr1	107460461	107460777	Project004-IPSHOCH-Exp5-ChIP-ES-CTCF-IP-Blobel-Rep2-S1_S2_MACS2_rendition_1E-8_downsampled_try3_peak_1638	453	18.2205	45.3184	42.5303	128
chr1	107527147	107527451	Project004-IPSHOCH-Exp5-ChIP-ES-CTCF-IP-Blobel-Rep2-S1_S2_MACS2_rendition_1E-8_downsampled_try3_peak_1639	652	19.375	65.2077	62.179	155
chr1	107556682	107556954	Project004-IPSHOCH-Exp5-ChIP-ES-CTCF-IP-Blobel-Rep2-S1_S2_MACS2_rendition_1E-8_downsampled_try3_peak_1640	410	15.3359	41.0653	38.3246	159
chr1	107577194	107577561	Project004-IPSHOCH-Exp5-ChIP-ES-CTCF-IP-Blobel-Rep2-S1_S2_MACS2_rendition_1E-8_downsampled_try3_peak_1641	537	19.4595	53.7338	50.8462	171
chr1	107607730	107608317	Project004-IPSHOCH-Exp5-ChIP-ES-CTCF-IP-Blobel-Rep2-S1_S2_MACS2_rendition_1E-8_downsampled_try3_peak_1642	658	17.2881	65.8689	62.8321	275
chr1	107631903	107632161	Project004-IPSHOCH-Exp5-ChIP-ES-CTCF-IP-Blobel-Rep2-S1_S2_MACS2_rendition_1E-8_downsampled_try3_peak_1643	152	6	15.2185	12.8533	117
chr1	107676998	107677336	Project004-IPSHOCH-Exp5-ChIP-ES-CTCF-IP-Blobel-Rep2-S1_S2_MACS2_rendition_1E-8_downsampled_try3_peak_1644	775	25.0594	77.5161	74.3325	190
chr1	107777664	107777871	Project004-IPSHOCH-Exp5-ChIP-ES-CTCF-IP-Blobel-Rep2-S1_S2_MACS2_rendition_1E-8_downsampled_try3_peak_1645	240	11.2317	24.0641	21.5491	92
chr1	107782275	107782502	Project004-IPSHOCH-Exp5-ChIP-ES-CTCF-IP-Blobel-Rep2-S1_S2_MACS2_rendition_1E-8_downsampled_try3_peak_1646	228	10.5405	22.8938	20.394	118
chr1	107787672	107788019	Project004-IPSHOCH-Exp5-ChIP-ES-CTCF-IP-Blobel-Rep2-S1_S2_MACS2_rendition_1E-8_downsampled_try3_peak_1647	1092	37.7778	109.282	105.669	148
chr1	107801286	107801715	Project004-IPSHOCH-Exp5-ChIP-ES-CTCF-IP-Blobel-Rep2-S1_S2_MACS2_rendition_1E-8_downsampled_try3_peak_1648	992	31.9673	99.2857	95.8102	187
chr1	107933491	107933949	Project004-IPSHOCH-Exp5-ChIP-ES-CTCF-IP-Blobel-Rep2-S1_S2_MACS2_rendition_1E-8_downsampled_try3_peak_1649	1167	34.8649	116.709	112.989	244
chr1	107967807	107968198	Project004-IPSHOCH-Exp5-ChIP-ES-CTCF-IP-Blobel-Rep2-S1_S2_MACS2_rendition_1E-8_downsampled_try3_peak_1650	1363	33.4375	136.396	132.376	197
chr1	108048398	108048660	Project004-IPSHOCH-Exp5-ChIP-ES-CTCF-IP-Blobel-Rep2-S1_S2_MACS2_rendition_1E-8_downsampled_try3_peak_1651	230	9.375	23.0745	20.5725	103
chr1	108048875	108049072	Project004-IPSHOCH-Exp5-ChIP-ES-CTCF-IP-Blobel-Rep2-S1_S2_MACS2_rendition_1E-8_downsampled_try3_peak_1652	134	7.2973	13.4146	11.0819	102
chr1	108067688	108068084	Project004-IPSHOCH-Exp5-ChIP-ES-CTCF-IP-Blobel-Rep2-S1_S2_MACS2_rendition_1E-8_downsampled_try3_peak_1653	569	18.976	56.9552	54.0272	226
chr1	108243431	108243637	Project004-IPSHOCH-Exp5-ChIP-ES-CTCF-IP-Blobel-Rep2-S1_S2_MACS2_rendition_1E-8_downsampled_try3_peak_1654	358	13.6054	35.8407	33.169	99
chr1	108286377	108286696	Project004-IPSHOCH-Exp5-ChIP-ES-CTCF-IP-Blobel-Rep2-S1_S2_MACS2_rendition_1E-8_downsampled_try3_peak_1655	763	25.4683	76.3973	73.2267	162
chr1	108292118	108292580	Project004-IPSHOCH-Exp5-ChIP-ES-CTCF-IP-Blobel-Rep2-S1_S2_MACS2_rendition_1E-8_downsampled_try3_peak_1656	1377	43.8385	137.706	133.669	163
chr1	108321655	108322443	Project004-IPSHOCH-Exp5-ChIP-ES-CTCF-IP-Blobel-Rep2-S1_S2_MACS2_rendition_1E-8_downsampled_try3_peak_1657	1298	40.5405	129.834	125.917	259
chr1	108408147	108408564	Project004-IPSHOCH-Exp5-ChIP-ES-CTCF-IP-Blobel-Rep2-S1_S2_MACS2_rendition_1E-8_downsampled_try3_peak_1658	1263	31.5625	126.336	122.473	199
chr1	108439378	108439659	Project004-IPSHOCH-Exp5-ChIP-ES-CTCF-IP-Blobel-Rep2-S1_S2_MACS2_rendition_1E-8_downsampled_try3_peak_1659	552	19.8649	55.2579	52.3488	153
chr1	108441469	108441755	Project004-IPSHOCH-Exp5-ChIP-ES-CTCF-IP-Blobel-Rep2-S1_S2_MACS2_rendition_1E-8_downsampled_try3_peak_1660	476	19.6084	47.6718	44.8551	162
chr1	108525420	108525655	Project004-IPSHOCH-Exp5-ChIP-ES-CTCF-IP-Blobel-Rep2-S1_S2_MACS2_rendition_1E-8_downsampled_try3_peak_1661	216	10.1351	21.6442	19.1647	147
chr1	108608984	108609217	Project004-IPSHOCH-Exp5-ChIP-ES-CTCF-IP-Blobel-Rep2-S1_S2_MACS2_rendition_1E-8_downsampled_try3_peak_1662	254	11.3514	25.4413	22.9023	113
chr1	108613871	108614168	Project004-IPSHOCH-Exp5-ChIP-ES-CTCF-IP-Blobel-Rep2-S1_S2_MACS2_rendition_1E-8_downsampled_try3_peak_1663	927	27.2109	92.7718	89.3854	152
chr1	108632193	108632548	Project004-IPSHOCH-Exp5-ChIP-ES-CTCF-IP-Blobel-Rep2-S1_S2_MACS2_rendition_1E-8_downsampled_try3_peak_1664	949	28.4275	94.9977	91.5832	191
chr1	108634637	108634990	Project004-IPSHOCH-Exp5-ChIP-ES-CTCF-IP-Blobel-Rep2-S1_S2_MACS2_rendition_1E-8_downsampled_try3_peak_1665	823	26.7568	82.3854	79.1371	196
chr1	108696593	108696807	Project004-IPSHOCH-Exp5-ChIP-ES-CTCF-IP-Blobel-Rep2-S1_S2_MACS2_rendition_1E-8_downsampled_try3_peak_1666	301	14.1402	30.1384	27.5409	87
chr1	108715021	108715257	Project004-IPSHOCH-Exp5-ChIP-ES-CTCF-IP-Blobel-Rep2-S1_S2_MACS2_rendition_1E-8_downsampled_try3_peak_1667	313	11.5625	31.3987	28.7817	114
chr1	108780449	108780781	Project004-IPSHOCH-Exp5-ChIP-ES-CTCF-IP-Blobel-Rep2-S1_S2_MACS2_rendition_1E-8_downsampled_try3_peak_1668	692	26.5465	69.2647	66.1871	161
chr1	108797993	108798510	Project004-IPSHOCH-Exp5-ChIP-ES-CTCF-IP-Blobel-Rep2-S1_S2_MACS2_rendition_1E-8_downsampled_try3_peak_1669	1055	36.7568	105.512	101.95	235
chr1	108857585	108857982	Project004-IPSHOCH-Exp5-ChIP-ES-CTCF-IP-Blobel-Rep2-S1_S2_MACS2_rendition_1E-8_downsampled_try3_peak_1670	539	21.952	53.9732	51.077	209
chr1	108911095	108911470	Project004-IPSHOCH-Exp5-ChIP-ES-CTCF-IP-Blobel-Rep2-S1_S2_MACS2_rendition_1E-8_downsampled_try3_peak_1671	1092	37.7778	109.282	105.669	168
chr1	109024084	109024401	Project004-IPSHOCH-Exp5-ChIP-ES-CTCF-IP-Blobel-Rep2-S1_S2_MACS2_rendition_1E-8_downsampled_try3_peak_1672	840	27.1622	84.0452	80.7743	149
chr1	109139784	109140207	Project004-IPSHOCH-Exp5-ChIP-ES-CTCF-IP-Blobel-Rep2-S1_S2_MACS2_rendition_1E-8_downsampled_try3_peak_1673	710	20.625	71.0769	67.9713	192
chr1	109249660	109249973	Project004-IPSHOCH-Exp5-ChIP-ES-CTCF-IP-Blobel-Rep2-S1_S2_MACS2_rendition_1E-8_downsampled_try3_peak_1674	608	18.4375	60.8783	57.9004	185
chr1	109378113	109378445	Project004-IPSHOCH-Exp5-ChIP-ES-CTCF-IP-Blobel-Rep2-S1_S2_MACS2_rendition_1E-8_downsampled_try3_peak_1675	1292	37.7027	129.225	125.316	174
chr1	109450789	109450963	Project004-IPSHOCH-Exp5-ChIP-ES-CTCF-IP-Blobel-Rep2-S1_S2_MACS2_rendition_1E-8_downsampled_try3_peak_1676	232	11.7417	23.2312	20.7218	88
chr1	109458805	109458988	Project004-IPSHOCH-Exp5-ChIP-ES-CTCF-IP-Blobel-Rep2-S1_S2_MACS2_rendition_1E-8_downsampled_try3_peak_1677	165	9.18919	16.529	14.131	106
chr1	109462306	109462477	Project004-IPSHOCH-Exp5-ChIP-ES-CTCF-IP-Blobel-Rep2-S1_S2_MACS2_rendition_1E-8_downsampled_try3_peak_1678	204	10.7207	20.4889	18.022	69
chr1	109495075	109495444	Project004-IPSHOCH-Exp5-ChIP-ES-CTCF-IP-Blobel-Rep2-S1_S2_MACS2_rendition_1E-8_downsampled_try3_peak_1679	486	19.7514	48.6794	45.8506	153
chr1	109532573	109532771	Project004-IPSHOCH-Exp5-ChIP-ES-CTCF-IP-Blobel-Rep2-S1_S2_MACS2_rendition_1E-8_downsampled_try3_peak_1680	348	15.4157	34.8576	32.1984	94
chr1	109856605	109856929	Project004-IPSHOCH-Exp5-ChIP-ES-CTCF-IP-Blobel-Rep2-S1_S2_MACS2_rendition_1E-8_downsampled_try3_peak_1681	277	10.625	27.7551	25.1846	179
chr1	110667172	110667471	Project004-IPSHOCH-Exp5-ChIP-ES-CTCF-IP-Blobel-Rep2-S1_S2_MACS2_rendition_1E-8_downsampled_try3_peak_1682	259	9.15254	25.9837	23.442	146
chr1	110721514	110721719	Project004-IPSHOCH-Exp5-ChIP-ES-CTCF-IP-Blobel-Rep2-S1_S2_MACS2_rendition_1E-8_downsampled_try3_peak_1683	191	10.2102	19.1475	16.7048	77
chr1	110723827	110724178	Project004-IPSHOCH-Exp5-ChIP-ES-CTCF-IP-Blobel-Rep2-S1_S2_MACS2_rendition_1E-8_downsampled_try3_peak_1684	447	17.027	44.7837	42	203
chr1	110769078	110769329	Project004-IPSHOCH-Exp5-ChIP-ES-CTCF-IP-Blobel-Rep2-S1_S2_MACS2_rendition_1E-8_downsampled_try3_peak_1685	232	11.7417	23.2312	20.7218	138
chr1	111731186	111731517	Project004-IPSHOCH-Exp5-ChIP-ES-CTCF-IP-Blobel-Rep2-S1_S2_MACS2_rendition_1E-8_downsampled_try3_peak_1686	798	29.6096	79.8396	76.6257	155
chr1	111882100	111882454	Project004-IPSHOCH-Exp5-ChIP-ES-CTCF-IP-Blobel-Rep2-S1_S2_MACS2_rendition_1E-8_downsampled_try3_peak_1687	798	29.6096	79.8396	76.6257	161
chr1	113138981	113139285	Project004-IPSHOCH-Exp5-ChIP-ES-CTCF-IP-Blobel-Rep2-S1_S2_MACS2_rendition_1E-8_downsampled_try3_peak_1688	259	9.15254	25.9837	23.442	136
chr1	113530721	113531016	Project004-IPSHOCH-Exp5-ChIP-ES-CTCF-IP-Blobel-Rep2-S1_S2_MACS2_rendition_1E-8_downsampled_try3_peak_1689	589	23.4835	58.9881	56.0337	161
chr1	113556714	113557250	Project004-IPSHOCH-Exp5-ChIP-ES-CTCF-IP-Blobel-Rep2-S1_S2_MACS2_rendition_1E-8_downsampled_try3_peak_1690	1265	42.3724	126.523	122.651	319
chr1	113739342	113739675	Project004-IPSHOCH-Exp5-ChIP-ES-CTCF-IP-Blobel-Rep2-S1_S2_MACS2_rendition_1E-8_downsampled_try3_peak_1691	710	20.625	71.0769	67.9713	158
chr1	113760539	113760959	Project004-IPSHOCH-Exp5-ChIP-ES-CTCF-IP-Blobel-Rep2-S1_S2_MACS2_rendition_1E-8_downsampled_try3_peak_1692	958	30	95.8394	92.4129	173
chr1	114275147	114275664	Project004-IPSHOCH-Exp5-ChIP-ES-CTCF-IP-Blobel-Rep2-S1_S2_MACS2_rendition_1E-8_downsampled_try3_peak_1693	1402	45.946	140.227	136.146	323
chr1	114276481	114276994	Project004-IPSHOCH-Exp5-ChIP-ES-CTCF-IP-Blobel-Rep2-S1_S2_MACS2_rendition_1E-8_downsampled_try3_peak_1694	584	19.8244	58.4923	55.5447	218
chr1	114285358	114285868	Project004-IPSHOCH-Exp5-ChIP-ES-CTCF-IP-Blobel-Rep2-S1_S2_MACS2_rendition_1E-8_downsampled_try3_peak_1695	827	20.339	82.7237	79.4729	185
chr1	114348271	114348578	Project004-IPSHOCH-Exp5-ChIP-ES-CTCF-IP-Blobel-Rep2-S1_S2_MACS2_rendition_1E-8_downsampled_try3_peak_1696	442	14.6875	44.2539	41.4744	149
chr1	114349031	114349290	Project004-IPSHOCH-Exp5-ChIP-ES-CTCF-IP-Blobel-Rep2-S1_S2_MACS2_rendition_1E-8_downsampled_try3_peak_1697	265	10.3125	26.5652	24.012	121
chr1	114350142	114350344	Project004-IPSHOCH-Exp5-ChIP-ES-CTCF-IP-Blobel-Rep2-S1_S2_MACS2_rendition_1E-8_downsampled_try3_peak_1698	216	10.1351	21.6442	19.1647	85
chr1	114352636	114352965	Project004-IPSHOCH-Exp5-ChIP-ES-CTCF-IP-Blobel-Rep2-S1_S2_MACS2_rendition_1E-8_downsampled_try3_peak_1699	948	29.9869	94.8278	91.414	170
chr1	114600621	114600883	Project004-IPSHOCH-Exp5-ChIP-ES-CTCF-IP-Blobel-Rep2-S1_S2_MACS2_rendition_1E-8_downsampled_try3_peak_1700	239	10.4733	23.9239	21.4098	78
chr1	114771320	114771565	Project004-IPSHOCH-Exp5-ChIP-ES-CTCF-IP-Blobel-Rep2-S1_S2_MACS2_rendition_1E-8_downsampled_try3_peak_1701	270	11.9126	27.0048	24.4459	122
chr1	115143918	115144296	Project004-IPSHOCH-Exp5-ChIP-ES-CTCF-IP-Blobel-Rep2-S1_S2_MACS2_rendition_1E-8_downsampled_try3_peak_1702	727	27.5676	72.7582	69.6309	217
chr1	115734517	115734690	Project004-IPSHOCH-Exp5-ChIP-ES-CTCF-IP-Blobel-Rep2-S1_S2_MACS2_rendition_1E-8_downsampled_try3_peak_1703	152	8.67868	15.2542	12.8807	87
chr1	116858500	116858857	Project004-IPSHOCH-Exp5-ChIP-ES-CTCF-IP-Blobel-Rep2-S1_S2_MACS2_rendition_1E-8_downsampled_try3_peak_1704	524	16.5625	52.4199	49.5431	143
chr1	117498039	117498202	Project004-IPSHOCH-Exp5-ChIP-ES-CTCF-IP-Blobel-Rep2-S1_S2_MACS2_rendition_1E-8_downsampled_try3_peak_1705	112	6.48649	11.2573	8.9767	117
chr1	117583151	117583364	Project004-IPSHOCH-Exp5-ChIP-ES-CTCF-IP-Blobel-Rep2-S1_S2_MACS2_rendition_1E-8_downsampled_try3_peak_1706	176	7.11864	17.6258	15.2133	93
chr1	118209864	118210265	Project004-IPSHOCH-Exp5-ChIP-ES-CTCF-IP-Blobel-Rep2-S1_S2_MACS2_rendition_1E-8_downsampled_try3_peak_1707	1207	40.8408	120.727	116.942	165
chr1	118291409	118291590	Project004-IPSHOCH-Exp5-ChIP-ES-CTCF-IP-Blobel-Rep2-S1_S2_MACS2_rendition_1E-8_downsampled_try3_peak_1708	179	8.91892	17.9999	15.5739	118
chr1	118314235	118314398	Project004-IPSHOCH-Exp5-ChIP-ES-CTCF-IP-Blobel-Rep2-S1_S2_MACS2_rendition_1E-8_downsampled_try3_peak_1709	127	7.65766	12.7801	10.457	73
chr1	118374279	118374654	Project004-IPSHOCH-Exp5-ChIP-ES-CTCF-IP-Blobel-Rep2-S1_S2_MACS2_rendition_1E-8_downsampled_try3_peak_1710	785	22.1875	78.5596	75.3623	198
chr1	119251193	119251585	Project004-IPSHOCH-Exp5-ChIP-ES-CTCF-IP-Blobel-Rep2-S1_S2_MACS2_rendition_1E-8_downsampled_try3_peak_1711	908	24.6875	90.8436	87.4807	209
chr1	119275717	119275989	Project004-IPSHOCH-Exp5-ChIP-ES-CTCF-IP-Blobel-Rep2-S1_S2_MACS2_rendition_1E-8_downsampled_try3_peak_1712	364	16.3363	36.4081	33.724	150
chr1	119309004	119309321	Project004-IPSHOCH-Exp5-ChIP-ES-CTCF-IP-Blobel-Rep2-S1_S2_MACS2_rendition_1E-8_downsampled_try3_peak_1713	437	16.8419	43.7088	40.9406	148
chr1	119393244	119393419	Project004-IPSHOCH-Exp5-ChIP-ES-CTCF-IP-Blobel-Rep2-S1_S2_MACS2_rendition_1E-8_downsampled_try3_peak_1714	140	8.16817	14.0041	11.6555	94
chr1	119399927	119400154	Project004-IPSHOCH-Exp5-ChIP-ES-CTCF-IP-Blobel-Rep2-S1_S2_MACS2_rendition_1E-8_downsampled_try3_peak_1715	335	14.2557	33.5695	30.921	109
chr1	119416144	119416541	Project004-IPSHOCH-Exp5-ChIP-ES-CTCF-IP-Blobel-Rep2-S1_S2_MACS2_rendition_1E-8_downsampled_try3_peak_1716	755	19.0678	75.5994	72.4413	180
chr1	119909460	119909642	Project004-IPSHOCH-Exp5-ChIP-ES-CTCF-IP-Blobel-Rep2-S1_S2_MACS2_rendition_1E-8_downsampled_try3_peak_1717	232	11.7417	23.2312	20.7218	79
chr1	120171750	120172079	Project004-IPSHOCH-Exp5-ChIP-ES-CTCF-IP-Blobel-Rep2-S1_S2_MACS2_rendition_1E-8_downsampled_try3_peak_1718	820	27.6474	82.0571	78.8153	172
chr1	120217299	120217804	Project004-IPSHOCH-Exp5-ChIP-ES-CTCF-IP-Blobel-Rep2-S1_S2_MACS2_rendition_1E-8_downsampled_try3_peak_1719	1147	29.375	114.794	111.104	187
chr1	120218103	120218631	Project004-IPSHOCH-Exp5-ChIP-ES-CTCF-IP-Blobel-Rep2-S1_S2_MACS2_rendition_1E-8_downsampled_try3_peak_1720	1351	42.3745	135.186	131.185	252
chr1	120264547	120264815	Project004-IPSHOCH-Exp5-ChIP-ES-CTCF-IP-Blobel-Rep2-S1_S2_MACS2_rendition_1E-8_downsampled_try3_peak_1721	374	13.7338	37.4572	34.7677	114
chr1	120332769	120333068	Project004-IPSHOCH-Exp5-ChIP-ES-CTCF-IP-Blobel-Rep2-S1_S2_MACS2_rendition_1E-8_downsampled_try3_peak_1722	204	10.6695	20.4039	17.9477	104
chr1	120355507	120355705	Project004-IPSHOCH-Exp5-ChIP-ES-CTCF-IP-Blobel-Rep2-S1_S2_MACS2_rendition_1E-8_downsampled_try3_peak_1723	181	5.86957	18.161	15.7347	104
chr1	120362547	120362987	Project004-IPSHOCH-Exp5-ChIP-ES-CTCF-IP-Blobel-Rep2-S1_S2_MACS2_rendition_1E-8_downsampled_try3_peak_1724	770	21.875	77.0506	73.8727	268
chr1	120373446	120373907	Project004-IPSHOCH-Exp5-ChIP-ES-CTCF-IP-Blobel-Rep2-S1_S2_MACS2_rendition_1E-8_downsampled_try3_peak_1725	598	21.0811	59.8822	56.9181	239
chr1	120389466	120389734	Project004-IPSHOCH-Exp5-ChIP-ES-CTCF-IP-Blobel-Rep2-S1_S2_MACS2_rendition_1E-8_downsampled_try3_peak_1726	524	16.5625	52.4199	49.5431	127
chr1	120394912	120395272	Project004-IPSHOCH-Exp5-ChIP-ES-CTCF-IP-Blobel-Rep2-S1_S2_MACS2_rendition_1E-8_downsampled_try3_peak_1727	941	29.5946	94.1364	90.7333	184
chr1	120402411	120402667	Project004-IPSHOCH-Exp5-ChIP-ES-CTCF-IP-Blobel-Rep2-S1_S2_MACS2_rendition_1E-8_downsampled_try3_peak_1728	395	15.2706	39.5014	36.7789	108
chr1	120425846	120426175	Project004-IPSHOCH-Exp5-ChIP-ES-CTCF-IP-Blobel-Rep2-S1_S2_MACS2_rendition_1E-8_downsampled_try3_peak_1729	482	18.5756	48.2271	45.4045	191
chr1	120461177	120461571	Project004-IPSHOCH-Exp5-ChIP-ES-CTCF-IP-Blobel-Rep2-S1_S2_MACS2_rendition_1E-8_downsampled_try3_peak_1730	819	25.4351	81.9046	78.6638	141
chr1	120524334	120524518	Project004-IPSHOCH-Exp5-ChIP-ES-CTCF-IP-Blobel-Rep2-S1_S2_MACS2_rendition_1E-8_downsampled_try3_peak_1731	156	5.38043	15.6542	13.2769	52
chr1	120656195	120656527	Project004-IPSHOCH-Exp5-ChIP-ES-CTCF-IP-Blobel-Rep2-S1_S2_MACS2_rendition_1E-8_downsampled_try3_peak_1732	712	16.5	71.2845	68.1776	169
chr1	120660648	120660871	Project004-IPSHOCH-Exp5-ChIP-ES-CTCF-IP-Blobel-Rep2-S1_S2_MACS2_rendition_1E-8_downsampled_try3_peak_1733	218	11.2312	21.8505	19.3628	125
chr1	120665345	120665795	Project004-IPSHOCH-Exp5-ChIP-ES-CTCF-IP-Blobel-Rep2-S1_S2_MACS2_rendition_1E-8_downsampled_try3_peak_1734	1073	37.2673	107.394	103.807	247
chr1	120668924	120669296	Project004-IPSHOCH-Exp5-ChIP-ES-CTCF-IP-Blobel-Rep2-S1_S2_MACS2_rendition_1E-8_downsampled_try3_peak_1735	1330	32.8125	133.026	129.055	163
chr1	120718711	120719198	Project004-IPSHOCH-Exp5-ChIP-ES-CTCF-IP-Blobel-Rep2-S1_S2_MACS2_rendition_1E-8_downsampled_try3_peak_1736	857	27.5676	85.7116	82.4188	325
chr1	120866740	120866922	Project004-IPSHOCH-Exp5-ChIP-ES-CTCF-IP-Blobel-Rep2-S1_S2_MACS2_rendition_1E-8_downsampled_try3_peak_1737	277	10.625	27.7551	25.1846	81
chr1	120918607	120918869	Project004-IPSHOCH-Exp5-ChIP-ES-CTCF-IP-Blobel-Rep2-S1_S2_MACS2_rendition_1E-8_downsampled_try3_peak_1738	289	13.7838	28.9313	26.346	131
chr1	120928799	120929050	Project004-IPSHOCH-Exp5-ChIP-ES-CTCF-IP-Blobel-Rep2-S1_S2_MACS2_rendition_1E-8_downsampled_try3_peak_1739	273	12.4825	27.3584	24.7976	128
chr1	120950118	120950513	Project004-IPSHOCH-Exp5-ChIP-ES-CTCF-IP-Blobel-Rep2-S1_S2_MACS2_rendition_1E-8_downsampled_try3_peak_1740	1486	36.9385	148.681	144.476	191
chr1	120971438	120971964	Project004-IPSHOCH-Exp5-ChIP-ES-CTCF-IP-Blobel-Rep2-S1_S2_MACS2_rendition_1E-8_downsampled_try3_peak_1741	1048	24.1525	104.875	101.324	239
chr1	120979214	120979648	Project004-IPSHOCH-Exp5-ChIP-ES-CTCF-IP-Blobel-Rep2-S1_S2_MACS2_rendition_1E-8_downsampled_try3_peak_1742	834	21.4892	83.4283	80.1665	159
chr1	120980152	120980648	Project004-IPSHOCH-Exp5-ChIP-ES-CTCF-IP-Blobel-Rep2-S1_S2_MACS2_rendition_1E-8_downsampled_try3_peak_1743	1333	36.9873	133.381	129.41	283
chr1	120984029	120984464	Project004-IPSHOCH-Exp5-ChIP-ES-CTCF-IP-Blobel-Rep2-S1_S2_MACS2_rendition_1E-8_downsampled_try3_peak_1744	1515	38.4545	151.578	147.33	250
chr1	120990239	120990711	Project004-IPSHOCH-Exp5-ChIP-ES-CTCF-IP-Blobel-Rep2-S1_S2_MACS2_rendition_1E-8_downsampled_try3_peak_1745	1050	27.5	105.08	101.525	213
chr1	120991494	120991759	Project004-IPSHOCH-Exp5-ChIP-ES-CTCF-IP-Blobel-Rep2-S1_S2_MACS2_rendition_1E-8_downsampled_try3_peak_1746	342	15.4684	34.2824	31.6288	126
chr1	121016485	121016974	Project004-IPSHOCH-Exp5-ChIP-ES-CTCF-IP-Blobel-Rep2-S1_S2_MACS2_rendition_1E-8_downsampled_try3_peak_1747	760	26.8752	76.0806	72.9163	182
chr1	121050268	121050587	Project004-IPSHOCH-Exp5-ChIP-ES-CTCF-IP-Blobel-Rep2-S1_S2_MACS2_rendition_1E-8_downsampled_try3_peak_1748	258	8.35714	25.8538	23.3131	158
chr1	121056980	121057213	Project004-IPSHOCH-Exp5-ChIP-ES-CTCF-IP-Blobel-Rep2-S1_S2_MACS2_rendition_1E-8_downsampled_try3_peak_1749	339	13.7043	33.9698	31.3171	157
chr1	121152741	121153048	Project004-IPSHOCH-Exp5-ChIP-ES-CTCF-IP-Blobel-Rep2-S1_S2_MACS2_rendition_1E-8_downsampled_try3_peak_1750	567	20.2703	56.7908	53.8633	151
chr1	121241960	121242409	Project004-IPSHOCH-Exp5-ChIP-ES-CTCF-IP-Blobel-Rep2-S1_S2_MACS2_rendition_1E-8_downsampled_try3_peak_1751	1131	34.054	113.178	109.501	207
chr1	121319253	121319512	Project004-IPSHOCH-Exp5-ChIP-ES-CTCF-IP-Blobel-Rep2-S1_S2_MACS2_rendition_1E-8_downsampled_try3_peak_1752	134	6.5625	13.4274	11.0925	128
chr1	121320109	121320590	Project004-IPSHOCH-Exp5-ChIP-ES-CTCF-IP-Blobel-Rep2-S1_S2_MACS2_rendition_1E-8_downsampled_try3_peak_1753	1662	49.1953	166.268	161.795	230
chr1	121340600	121340844	Project004-IPSHOCH-Exp5-ChIP-ES-CTCF-IP-Blobel-Rep2-S1_S2_MACS2_rendition_1E-8_downsampled_try3_peak_1754	374	13.7338	37.4572	34.7677	118
chr1	121354836	121355243	Project004-IPSHOCH-Exp5-ChIP-ES-CTCF-IP-Blobel-Rep2-S1_S2_MACS2_rendition_1E-8_downsampled_try3_peak_1755	570	14.1429	57.0619	54.1328	161
chr1	121360019	121360375	Project004-IPSHOCH-Exp5-ChIP-ES-CTCF-IP-Blobel-Rep2-S1_S2_MACS2_rendition_1E-8_downsampled_try3_peak_1756	774	25.5405	77.4452	74.2623	154
chr1	121378172	121378562	Project004-IPSHOCH-Exp5-ChIP-ES-CTCF-IP-Blobel-Rep2-S1_S2_MACS2_rendition_1E-8_downsampled_try3_peak_1757	538	15	53.8199	50.9289	144
chr1	121379582	121379823	Project004-IPSHOCH-Exp5-ChIP-ES-CTCF-IP-Blobel-Rep2-S1_S2_MACS2_rendition_1E-8_downsampled_try3_peak_1758	294	12.9597	29.4094	26.8145	103
chr1	121381015	121381479	Project004-IPSHOCH-Exp5-ChIP-ES-CTCF-IP-Blobel-Rep2-S1_S2_MACS2_rendition_1E-8_downsampled_try3_peak_1759	1095	35.5299	109.522	105.904	187
chr1	121390935	121391219	Project004-IPSHOCH-Exp5-ChIP-ES-CTCF-IP-Blobel-Rep2-S1_S2_MACS2_rendition_1E-8_downsampled_try3_peak_1760	595	21.3694	59.5418	56.582	144
chr1	121445288	121445675	Project004-IPSHOCH-Exp5-ChIP-ES-CTCF-IP-Blobel-Rep2-S1_S2_MACS2_rendition_1E-8_downsampled_try3_peak_1761	856	20.8475	85.6117	82.324	138
chr1	121539036	121539220	Project004-IPSHOCH-Exp5-ChIP-ES-CTCF-IP-Blobel-Rep2-S1_S2_MACS2_rendition_1E-8_downsampled_try3_peak_1762	179	8.91892	17.9999	15.5739	89
chr1	121551022	121551284	Project004-IPSHOCH-Exp5-ChIP-ES-CTCF-IP-Blobel-Rep2-S1_S2_MACS2_rendition_1E-8_downsampled_try3_peak_1763	367	14.4875	36.7125	34.0247	108
chr1	121571459	121571965	Project004-IPSHOCH-Exp5-ChIP-ES-CTCF-IP-Blobel-Rep2-S1_S2_MACS2_rendition_1E-8_downsampled_try3_peak_1764	1335	40.1751	133.572	129.599	315
chr1	121582299	121582861	Project004-IPSHOCH-Exp5-ChIP-ES-CTCF-IP-Blobel-Rep2-S1_S2_MACS2_rendition_1E-8_downsampled_try3_peak_1765	248	11.7157	24.8768	22.3463	341
chr1	121668468	121668750	Project004-IPSHOCH-Exp5-ChIP-ES-CTCF-IP-Blobel-Rep2-S1_S2_MACS2_rendition_1E-8_downsampled_try3_peak_1766	204	9.72973	20.4115	17.9517	156
chr1	121669024	121669241	Project004-IPSHOCH-Exp5-ChIP-ES-CTCF-IP-Blobel-Rep2-S1_S2_MACS2_rendition_1E-8_downsampled_try3_peak_1767	175	7.8125	17.5473	15.1358	63
chr1	121703198	121703385	Project004-IPSHOCH-Exp5-ChIP-ES-CTCF-IP-Blobel-Rep2-S1_S2_MACS2_rendition_1E-8_downsampled_try3_peak_1768	146	7.8048	14.6991	12.3384	114
chr1	121715239	121715594	Project004-IPSHOCH-Exp5-ChIP-ES-CTCF-IP-Blobel-Rep2-S1_S2_MACS2_rendition_1E-8_downsampled_try3_peak_1769	364	12.8125	36.4172	33.7309	243
chr1	121754546	121754727	Project004-IPSHOCH-Exp5-ChIP-ES-CTCF-IP-Blobel-Rep2-S1_S2_MACS2_rendition_1E-8_downsampled_try3_peak_1770	186	8.125	18.6213	16.1896	87
chr1	121791488	121792047	Project004-IPSHOCH-Exp5-ChIP-ES-CTCF-IP-Blobel-Rep2-S1_S2_MACS2_rendition_1E-8_downsampled_try3_peak_1771	1973	38.6441	197.344	192.447	276
chr1	121815858	121816270	Project004-IPSHOCH-Exp5-ChIP-ES-CTCF-IP-Blobel-Rep2-S1_S2_MACS2_rendition_1E-8_downsampled_try3_peak_1772	614	21.4865	61.4404	58.4569	192
chr1	121826394	121826680	Project004-IPSHOCH-Exp5-ChIP-ES-CTCF-IP-Blobel-Rep2-S1_S2_MACS2_rendition_1E-8_downsampled_try3_peak_1773	454	19.1902	45.4637	42.6751	135
chr1	121835303	121835663	Project004-IPSHOCH-Exp5-ChIP-ES-CTCF-IP-Blobel-Rep2-S1_S2_MACS2_rendition_1E-8_downsampled_try3_peak_1774	462	17.4324	46.2512	43.4487	224
chr1	121862536	121862760	Project004-IPSHOCH-Exp5-ChIP-ES-CTCF-IP-Blobel-Rep2-S1_S2_MACS2_rendition_1E-8_downsampled_try3_peak_1775	244	11.091	24.407	21.8855	109
chr1	121894325	121894518	Project004-IPSHOCH-Exp5-ChIP-ES-CTCF-IP-Blobel-Rep2-S1_S2_MACS2_rendition_1E-8_downsampled_try3_peak_1776	254	11.3514	25.4413	22.9023	98
chr1	121909686	121910139	Project004-IPSHOCH-Exp5-ChIP-ES-CTCF-IP-Blobel-Rep2-S1_S2_MACS2_rendition_1E-8_downsampled_try3_peak_1777	1724	54.1141	172.407	167.844	194
chr1	121912813	121913097	Project004-IPSHOCH-Exp5-ChIP-ES-CTCF-IP-Blobel-Rep2-S1_S2_MACS2_rendition_1E-8_downsampled_try3_peak_1778	510	18.403	51.0759	48.2162	136
chr1	121929482	121929953	Project004-IPSHOCH-Exp5-ChIP-ES-CTCF-IP-Blobel-Rep2-S1_S2_MACS2_rendition_1E-8_downsampled_try3_peak_1779	1887	42.8125	188.737	183.954	272
chr1	121990014	121990470	Project004-IPSHOCH-Exp5-ChIP-ES-CTCF-IP-Blobel-Rep2-S1_S2_MACS2_rendition_1E-8_downsampled_try3_peak_1780	2075	61.2763	207.597	202.579	276
chr1	121990585	121990755	Project004-IPSHOCH-Exp5-ChIP-ES-CTCF-IP-Blobel-Rep2-S1_S2_MACS2_rendition_1E-8_downsampled_try3_peak_1781	239	11.8344	23.9333	21.4191	83
chr1	121994838	121995326	Project004-IPSHOCH-Exp5-ChIP-ES-CTCF-IP-Blobel-Rep2-S1_S2_MACS2_rendition_1E-8_downsampled_try3_peak_1782	1152	35.8552	115.293	111.588	279
chr1	122043724	122043945	Project004-IPSHOCH-Exp5-ChIP-ES-CTCF-IP-Blobel-Rep2-S1_S2_MACS2_rendition_1E-8_downsampled_try3_peak_1783	216	10.1351	21.6442	19.1647	95
chr1	122050837	122051196	Project004-IPSHOCH-Exp5-ChIP-ES-CTCF-IP-Blobel-Rep2-S1_S2_MACS2_rendition_1E-8_downsampled_try3_peak_1784	700	18.0509	70.0029	66.9143	153
chr1	122051924	122052308	Project004-IPSHOCH-Exp5-ChIP-ES-CTCF-IP-Blobel-Rep2-S1_S2_MACS2_rendition_1E-8_downsampled_try3_peak_1785	1131	34.054	113.178	109.501	205
chr1	122054197	122054580	Project004-IPSHOCH-Exp5-ChIP-ES-CTCF-IP-Blobel-Rep2-S1_S2_MACS2_rendition_1E-8_downsampled_try3_peak_1786	658	25.5255	65.8043	62.7688	228
chr1	122068413	122068759	Project004-IPSHOCH-Exp5-ChIP-ES-CTCF-IP-Blobel-Rep2-S1_S2_MACS2_rendition_1E-8_downsampled_try3_peak_1787	376	13.125	37.6986	35.0025	128
chr1	122093685	122094167	Project004-IPSHOCH-Exp5-ChIP-ES-CTCF-IP-Blobel-Rep2-S1_S2_MACS2_rendition_1E-8_downsampled_try3_peak_1788	1474	41.7568	147.494	143.305	239
chr1	122127891	122128230	Project004-IPSHOCH-Exp5-ChIP-ES-CTCF-IP-Blobel-Rep2-S1_S2_MACS2_rendition_1E-8_downsampled_try3_peak_1789	652	19.375	65.2077	62.179	188
chr1	122149405	122149698	Project004-IPSHOCH-Exp5-ChIP-ES-CTCF-IP-Blobel-Rep2-S1_S2_MACS2_rendition_1E-8_downsampled_try3_peak_1790	794	27.7862	79.4893	76.2821	142
chr1	122186512	122186723	Project004-IPSHOCH-Exp5-ChIP-ES-CTCF-IP-Blobel-Rep2-S1_S2_MACS2_rendition_1E-8_downsampled_try3_peak_1791	164	7.5	16.4902	14.1	123
chr1	122193568	122193953	Project004-IPSHOCH-Exp5-ChIP-ES-CTCF-IP-Blobel-Rep2-S1_S2_MACS2_rendition_1E-8_downsampled_try3_peak_1792	473	13.7288	47.376	44.5648	134
chr1	122224220	122224628	Project004-IPSHOCH-Exp5-ChIP-ES-CTCF-IP-Blobel-Rep2-S1_S2_MACS2_rendition_1E-8_downsampled_try3_peak_1793	1079	24.661	107.91	104.317	236
chr1	122234588	122234924	Project004-IPSHOCH-Exp5-ChIP-ES-CTCF-IP-Blobel-Rep2-S1_S2_MACS2_rendition_1E-8_downsampled_try3_peak_1794	404	15.8108	40.4434	37.7123	149
chr1	122236976	122237139	Project004-IPSHOCH-Exp5-ChIP-ES-CTCF-IP-Blobel-Rep2-S1_S2_MACS2_rendition_1E-8_downsampled_try3_peak_1795	166	6.86441	16.6443	14.2447	54
chr1	122238996	122239353	Project004-IPSHOCH-Exp5-ChIP-ES-CTCF-IP-Blobel-Rep2-S1_S2_MACS2_rendition_1E-8_downsampled_try3_peak_1796	289	10.9375	28.9576	26.3703	120
chr1	122264691	122265082	Project004-IPSHOCH-Exp5-ChIP-ES-CTCF-IP-Blobel-Rep2-S1_S2_MACS2_rendition_1E-8_downsampled_try3_peak_1797	742	24.2763	74.2931	71.1504	194
chr1	122365493	122365836	Project004-IPSHOCH-Exp5-ChIP-ES-CTCF-IP-Blobel-Rep2-S1_S2_MACS2_rendition_1E-8_downsampled_try3_peak_1798	1245	41.8619	124.586	120.748	181
chr1	122445925	122446182	Project004-IPSHOCH-Exp5-ChIP-ES-CTCF-IP-Blobel-Rep2-S1_S2_MACS2_rendition_1E-8_downsampled_try3_peak_1799	645	17.0339	64.5035	61.4846	132
chr1	122446861	122447152	Project004-IPSHOCH-Exp5-ChIP-ES-CTCF-IP-Blobel-Rep2-S1_S2_MACS2_rendition_1E-8_downsampled_try3_peak_1800	845	30.216	84.5852	81.3124	156
chr1	122463303	122463467	Project004-IPSHOCH-Exp5-ChIP-ES-CTCF-IP-Blobel-Rep2-S1_S2_MACS2_rendition_1E-8_downsampled_try3_peak_1801	168	8.51351	16.8225	14.4184	111
chr1	122483042	122483414	Project004-IPSHOCH-Exp5-ChIP-ES-CTCF-IP-Blobel-Rep2-S1_S2_MACS2_rendition_1E-8_downsampled_try3_peak_1802	1474	46.2472	147.413	143.229	175
chr1	122491136	122491452	Project004-IPSHOCH-Exp5-ChIP-ES-CTCF-IP-Blobel-Rep2-S1_S2_MACS2_rendition_1E-8_downsampled_try3_peak_1803	681	20	68.1289	65.0626	157
chr1	122525549	122525741	Project004-IPSHOCH-Exp5-ChIP-ES-CTCF-IP-Blobel-Rep2-S1_S2_MACS2_rendition_1E-8_downsampled_try3_peak_1804	241	10.9459	24.1597	21.6411	85
chr1	122536511	122536684	Project004-IPSHOCH-Exp5-ChIP-ES-CTCF-IP-Blobel-Rep2-S1_S2_MACS2_rendition_1E-8_downsampled_try3_peak_1805	164	7.5	16.4902	14.1	124
chr1	122564367	122564707	Project004-IPSHOCH-Exp5-ChIP-ES-CTCF-IP-Blobel-Rep2-S1_S2_MACS2_rendition_1E-8_downsampled_try3_peak_1806	423	16.0537	42.3342	39.5828	194
chr1	122582478	122582788	Project004-IPSHOCH-Exp5-ChIP-ES-CTCF-IP-Blobel-Rep2-S1_S2_MACS2_rendition_1E-8_downsampled_try3_peak_1807	376	15	37.6044	34.9104	116
chr1	122594816	122595113	Project004-IPSHOCH-Exp5-ChIP-ES-CTCF-IP-Blobel-Rep2-S1_S2_MACS2_rendition_1E-8_downsampled_try3_peak_1808	474	19.9099	47.4277	44.6113	144
chr1	122610583	122610748	Project004-IPSHOCH-Exp5-ChIP-ES-CTCF-IP-Blobel-Rep2-S1_S2_MACS2_rendition_1E-8_downsampled_try3_peak_1809	168	8.51351	16.8225	14.4184	41
chr1	122950343	122950643	Project004-IPSHOCH-Exp5-ChIP-ES-CTCF-IP-Blobel-Rep2-S1_S2_MACS2_rendition_1E-8_downsampled_try3_peak_1810	351	11.1864	35.1054	32.4384	167
chr1	122968465	122968628	Project004-IPSHOCH-Exp5-ChIP-ES-CTCF-IP-Blobel-Rep2-S1_S2_MACS2_rendition_1E-8_downsampled_try3_peak_1811	127	7.65766	12.7801	10.457	72
chr1	123076965	123077244	Project004-IPSHOCH-Exp5-ChIP-ES-CTCF-IP-Blobel-Rep2-S1_S2_MACS2_rendition_1E-8_downsampled_try3_peak_1812	686	17.7966	68.6187	65.5494	153
chr1	123085478	123085902	Project004-IPSHOCH-Exp5-ChIP-ES-CTCF-IP-Blobel-Rep2-S1_S2_MACS2_rendition_1E-8_downsampled_try3_peak_1813	1310	38.1081	131.031	127.094	216
chr1	123112412	123112772	Project004-IPSHOCH-Exp5-ChIP-ES-CTCF-IP-Blobel-Rep2-S1_S2_MACS2_rendition_1E-8_downsampled_try3_peak_1814	999	35.2252	99.9038	96.4212	200
chr1	123145677	123146012	Project004-IPSHOCH-Exp5-ChIP-ES-CTCF-IP-Blobel-Rep2-S1_S2_MACS2_rendition_1E-8_downsampled_try3_peak_1815	458	19.3994	45.8181	43.0208	183
chr1	123286167	123286514	Project004-IPSHOCH-Exp5-ChIP-ES-CTCF-IP-Blobel-Rep2-S1_S2_MACS2_rendition_1E-8_downsampled_try3_peak_1816	923	32.5446	92.3844	89.0118	205
chr1	123296866	123297172	Project004-IPSHOCH-Exp5-ChIP-ES-CTCF-IP-Blobel-Rep2-S1_S2_MACS2_rendition_1E-8_downsampled_try3_peak_1817	470	19.2697	47.0981	44.2886	197
chr1	123315730	123316044	Project004-IPSHOCH-Exp5-ChIP-ES-CTCF-IP-Blobel-Rep2-S1_S2_MACS2_rendition_1E-8_downsampled_try3_peak_1818	289	13.7838	28.9313	26.346	140
chr1	123337609	123338020	Project004-IPSHOCH-Exp5-ChIP-ES-CTCF-IP-Blobel-Rep2-S1_S2_MACS2_rendition_1E-8_downsampled_try3_peak_1819	1161	32.2234	116.12	112.41	201
chr1	123386867	123387185	Project004-IPSHOCH-Exp5-ChIP-ES-CTCF-IP-Blobel-Rep2-S1_S2_MACS2_rendition_1E-8_downsampled_try3_peak_1820	640	25.015	64.0869	61.0712	191
chr1	123446071	123446432	Project004-IPSHOCH-Exp5-ChIP-ES-CTCF-IP-Blobel-Rep2-S1_S2_MACS2_rendition_1E-8_downsampled_try3_peak_1821	961	34.2042	96.1957	92.7608	207
chr1	123464408	123464852	Project004-IPSHOCH-Exp5-ChIP-ES-CTCF-IP-Blobel-Rep2-S1_S2_MACS2_rendition_1E-8_downsampled_try3_peak_1822	1163	21.2963	116.363	112.651	205
chr1	123481040	123481338	Project004-IPSHOCH-Exp5-ChIP-ES-CTCF-IP-Blobel-Rep2-S1_S2_MACS2_rendition_1E-8_downsampled_try3_peak_1823	289	13.7838	28.9313	26.346	145
chr1	123493656	123493819	Project004-IPSHOCH-Exp5-ChIP-ES-CTCF-IP-Blobel-Rep2-S1_S2_MACS2_rendition_1E-8_downsampled_try3_peak_1824	142	7.77583	14.2065	11.8556	74
chr1	123497673	123498027	Project004-IPSHOCH-Exp5-ChIP-ES-CTCF-IP-Blobel-Rep2-S1_S2_MACS2_rendition_1E-8_downsampled_try3_peak_1825	1092	37.7778	109.282	105.669	194
chr1	123525440	123525744	Project004-IPSHOCH-Exp5-ChIP-ES-CTCF-IP-Blobel-Rep2-S1_S2_MACS2_rendition_1E-8_downsampled_try3_peak_1826	402	13.75	40.2917	37.5643	148
chr1	123604992	123605211	Project004-IPSHOCH-Exp5-ChIP-ES-CTCF-IP-Blobel-Rep2-S1_S2_MACS2_rendition_1E-8_downsampled_try3_peak_1827	318	14.8048	31.8784	29.254	108
chr1	123695144	123695307	Project004-IPSHOCH-Exp5-ChIP-ES-CTCF-IP-Blobel-Rep2-S1_S2_MACS2_rendition_1E-8_downsampled_try3_peak_1828	168	8.51351	16.8225	14.4184	99
chr1	123699950	123700269	Project004-IPSHOCH-Exp5-ChIP-ES-CTCF-IP-Blobel-Rep2-S1_S2_MACS2_rendition_1E-8_downsampled_try3_peak_1829	470	19.2697	47.0981	44.2886	178
chr1	123800662	123800918	Project004-IPSHOCH-Exp5-ChIP-ES-CTCF-IP-Blobel-Rep2-S1_S2_MACS2_rendition_1E-8_downsampled_try3_peak_1830	320	13.3784	32.0676	29.4379	124
chr1	123904391	123904655	Project004-IPSHOCH-Exp5-ChIP-ES-CTCF-IP-Blobel-Rep2-S1_S2_MACS2_rendition_1E-8_downsampled_try3_peak_1831	458	19.3994	45.8181	43.0208	127
chr1	123951798	123952033	Project004-IPSHOCH-Exp5-ChIP-ES-CTCF-IP-Blobel-Rep2-S1_S2_MACS2_rendition_1E-8_downsampled_try3_peak_1832	307	12.973	30.7148	28.1028	124
chr1	124032699	124032941	Project004-IPSHOCH-Exp5-ChIP-ES-CTCF-IP-Blobel-Rep2-S1_S2_MACS2_rendition_1E-8_downsampled_try3_peak_1833	191	9.32432	19.1965	16.75	76
chr1	124066180	124066391	Project004-IPSHOCH-Exp5-ChIP-ES-CTCF-IP-Blobel-Rep2-S1_S2_MACS2_rendition_1E-8_downsampled_try3_peak_1834	289	13.7838	28.9313	26.346	125
chr1	124248175	124248487	Project004-IPSHOCH-Exp5-ChIP-ES-CTCF-IP-Blobel-Rep2-S1_S2_MACS2_rendition_1E-8_downsampled_try3_peak_1835	267	11.7568	26.7382	24.1807	127
chr1	124335946	124336352	Project004-IPSHOCH-Exp5-ChIP-ES-CTCF-IP-Blobel-Rep2-S1_S2_MACS2_rendition_1E-8_downsampled_try3_peak_1836	852	31.1411	85.2291	81.9441	189
chr1	124886275	124886525	Project004-IPSHOCH-Exp5-ChIP-ES-CTCF-IP-Blobel-Rep2-S1_S2_MACS2_rendition_1E-8_downsampled_try3_peak_1837	232	11.7417	23.2312	20.7218	103
chr1	124900012	124900197	Project004-IPSHOCH-Exp5-ChIP-ES-CTCF-IP-Blobel-Rep2-S1_S2_MACS2_rendition_1E-8_downsampled_try3_peak_1838	207	10.5983	20.7991	18.3293	91
chr1	125244412	125244607	Project004-IPSHOCH-Exp5-ChIP-ES-CTCF-IP-Blobel-Rep2-S1_S2_MACS2_rendition_1E-8_downsampled_try3_peak_1839	168	8.51351	16.8225	14.4184	118
chr1	125310818	125311120	Project004-IPSHOCH-Exp5-ChIP-ES-CTCF-IP-Blobel-Rep2-S1_S2_MACS2_rendition_1E-8_downsampled_try3_peak_1840	364	16.3363	36.4081	33.724	154
chr1	125871207	125871611	Project004-IPSHOCH-Exp5-ChIP-ES-CTCF-IP-Blobel-Rep2-S1_S2_MACS2_rendition_1E-8_downsampled_try3_peak_1841	1149	39.3093	114.979	111.277	190
chr1	125938139	125938691	Project004-IPSHOCH-Exp5-ChIP-ES-CTCF-IP-Blobel-Rep2-S1_S2_MACS2_rendition_1E-8_downsampled_try3_peak_1842	677	23.1081	67.7527	64.6901	214
chr1	125999701	126000094	Project004-IPSHOCH-Exp5-ChIP-ES-CTCF-IP-Blobel-Rep2-S1_S2_MACS2_rendition_1E-8_downsampled_try3_peak_1843	540	19.1861	54.0651	51.1676	127
chr1	126194980	126195254	Project004-IPSHOCH-Exp5-ChIP-ES-CTCF-IP-Blobel-Rep2-S1_S2_MACS2_rendition_1E-8_downsampled_try3_peak_1844	313	11.5625	31.3987	28.7817	137
chr1	126346769	126347037	Project004-IPSHOCH-Exp5-ChIP-ES-CTCF-IP-Blobel-Rep2-S1_S2_MACS2_rendition_1E-8_downsampled_try3_peak_1845	727	27.5676	72.7582	69.6309	127
chr1	126452996	126453277	Project004-IPSHOCH-Exp5-ChIP-ES-CTCF-IP-Blobel-Rep2-S1_S2_MACS2_rendition_1E-8_downsampled_try3_peak_1846	204	10.7207	20.4889	18.022	203
chr1	126570947	126571337	Project004-IPSHOCH-Exp5-ChIP-ES-CTCF-IP-Blobel-Rep2-S1_S2_MACS2_rendition_1E-8_downsampled_try3_peak_1847	870	31.6517	87.0398	83.7327	242
chr1	126614695	126615042	Project004-IPSHOCH-Exp5-ChIP-ES-CTCF-IP-Blobel-Rep2-S1_S2_MACS2_rendition_1E-8_downsampled_try3_peak_1848	1362	44.9249	136.287	132.272	191
chr1	127267377	127267734	Project004-IPSHOCH-Exp5-ChIP-ES-CTCF-IP-Blobel-Rep2-S1_S2_MACS2_rendition_1E-8_downsampled_try3_peak_1849	1115	28.75	111.537	107.885	168
chr1	127279262	127279542	Project004-IPSHOCH-Exp5-ChIP-ES-CTCF-IP-Blobel-Rep2-S1_S2_MACS2_rendition_1E-8_downsampled_try3_peak_1850	289	13.7838	28.9313	26.346	131
chr1	127413916	127414232	Project004-IPSHOCH-Exp5-ChIP-ES-CTCF-IP-Blobel-Rep2-S1_S2_MACS2_rendition_1E-8_downsampled_try3_peak_1851	552	19.8649	55.2579	52.3488	139
chr1	127415696	127416066	Project004-IPSHOCH-Exp5-ChIP-ES-CTCF-IP-Blobel-Rep2-S1_S2_MACS2_rendition_1E-8_downsampled_try3_peak_1852	675	26.036	67.5303	64.4731	127
chr1	127470892	127471206	Project004-IPSHOCH-Exp5-ChIP-ES-CTCF-IP-Blobel-Rep2-S1_S2_MACS2_rendition_1E-8_downsampled_try3_peak_1853	948	29.9869	94.8278	91.414	148
chr1	127478348	127478629	Project004-IPSHOCH-Exp5-ChIP-ES-CTCF-IP-Blobel-Rep2-S1_S2_MACS2_rendition_1E-8_downsampled_try3_peak_1854	426	18.3784	42.633	39.8736	119
chr1	127504041	127504414	Project004-IPSHOCH-Exp5-ChIP-ES-CTCF-IP-Blobel-Rep2-S1_S2_MACS2_rendition_1E-8_downsampled_try3_peak_1855	1034	27.1875	103.477	99.9463	162
chr1	127543517	127543750	Project004-IPSHOCH-Exp5-ChIP-ES-CTCF-IP-Blobel-Rep2-S1_S2_MACS2_rendition_1E-8_downsampled_try3_peak_1856	354	15.7792	35.4693	32.7988	100
chr1	127565664	127565970	Project004-IPSHOCH-Exp5-ChIP-ES-CTCF-IP-Blobel-Rep2-S1_S2_MACS2_rendition_1E-8_downsampled_try3_peak_1857	506	20.9309	50.6795	47.8272	153
chr1	127602078	127602351	Project004-IPSHOCH-Exp5-ChIP-ES-CTCF-IP-Blobel-Rep2-S1_S2_MACS2_rendition_1E-8_downsampled_try3_peak_1858	407	16.4156	40.7572	38.025	151
chr1	127626240	127626551	Project004-IPSHOCH-Exp5-ChIP-ES-CTCF-IP-Blobel-Rep2-S1_S2_MACS2_rendition_1E-8_downsampled_try3_peak_1859	658	17.2881	65.8689	62.8321	153
chr1	127686360	127686731	Project004-IPSHOCH-Exp5-ChIP-ES-CTCF-IP-Blobel-Rep2-S1_S2_MACS2_rendition_1E-8_downsampled_try3_peak_1860	1317	40.9961	131.711	127.766	177
chr1	127807149	127807417	Project004-IPSHOCH-Exp5-ChIP-ES-CTCF-IP-Blobel-Rep2-S1_S2_MACS2_rendition_1E-8_downsampled_try3_peak_1861	474	19.9099	47.4277	44.6113	123
chr1	128184090	128184278	Project004-IPSHOCH-Exp5-ChIP-ES-CTCF-IP-Blobel-Rep2-S1_S2_MACS2_rendition_1E-8_downsampled_try3_peak_1862	218	11.2312	21.8505	19.3628	72
chr1	128298170	128298450	Project004-IPSHOCH-Exp5-ChIP-ES-CTCF-IP-Blobel-Rep2-S1_S2_MACS2_rendition_1E-8_downsampled_try3_peak_1863	246	12.2523	24.6304	22.1021	139
chr1	128304412	128304797	Project004-IPSHOCH-Exp5-ChIP-ES-CTCF-IP-Blobel-Rep2-S1_S2_MACS2_rendition_1E-8_downsampled_try3_peak_1864	566	17.5	56.6146	53.6917	232
chr1	128328291	128328605	Project004-IPSHOCH-Exp5-ChIP-ES-CTCF-IP-Blobel-Rep2-S1_S2_MACS2_rendition_1E-8_downsampled_try3_peak_1865	469	15.3125	46.9413	44.133	144
chr1	128328955	128329190	Project004-IPSHOCH-Exp5-ChIP-ES-CTCF-IP-Blobel-Rep2-S1_S2_MACS2_rendition_1E-8_downsampled_try3_peak_1866	262	12.5253	26.2302	23.6804	109
chr1	128393267	128393720	Project004-IPSHOCH-Exp5-ChIP-ES-CTCF-IP-Blobel-Rep2-S1_S2_MACS2_rendition_1E-8_downsampled_try3_peak_1867	645	22.2973	64.5809	61.5577	221
chr1	128465393	128465827	Project004-IPSHOCH-Exp5-ChIP-ES-CTCF-IP-Blobel-Rep2-S1_S2_MACS2_rendition_1E-8_downsampled_try3_peak_1868	604	16.2712	60.4462	57.4774	262
chr1	128509510	128509815	Project004-IPSHOCH-Exp5-ChIP-ES-CTCF-IP-Blobel-Rep2-S1_S2_MACS2_rendition_1E-8_downsampled_try3_peak_1869	637	19.0625	63.7575	60.7478	162
chr1	128622950	128623363	Project004-IPSHOCH-Exp5-ChIP-ES-CTCF-IP-Blobel-Rep2-S1_S2_MACS2_rendition_1E-8_downsampled_try3_peak_1870	816	30.1201	81.6288	78.3889	257
chr1	128826319	128826594	Project004-IPSHOCH-Exp5-ChIP-ES-CTCF-IP-Blobel-Rep2-S1_S2_MACS2_rendition_1E-8_downsampled_try3_peak_1871	709	23.9189	70.9547	67.8579	116
chr1	128828287	128828719	Project004-IPSHOCH-Exp5-ChIP-ES-CTCF-IP-Blobel-Rep2-S1_S2_MACS2_rendition_1E-8_downsampled_try3_peak_1872	1642	52.0721	164.258	159.814	224
chr1	128844549	128844743	Project004-IPSHOCH-Exp5-ChIP-ES-CTCF-IP-Blobel-Rep2-S1_S2_MACS2_rendition_1E-8_downsampled_try3_peak_1873	232	11.7417	23.2312	20.7218	82
chr1	128849902	128850080	Project004-IPSHOCH-Exp5-ChIP-ES-CTCF-IP-Blobel-Rep2-S1_S2_MACS2_rendition_1E-8_downsampled_try3_peak_1874	178	9.6997	17.8272	15.4061	83
chr1	128863022	128863258	Project004-IPSHOCH-Exp5-ChIP-ES-CTCF-IP-Blobel-Rep2-S1_S2_MACS2_rendition_1E-8_downsampled_try3_peak_1875	589	23.4835	58.9881	56.0337	118
chr1	128889802	128890255	Project004-IPSHOCH-Exp5-ChIP-ES-CTCF-IP-Blobel-Rep2-S1_S2_MACS2_rendition_1E-8_downsampled_try3_peak_1876	961	34.2042	96.1957	92.7608	244
chr1	128908463	128908783	Project004-IPSHOCH-Exp5-ChIP-ES-CTCF-IP-Blobel-Rep2-S1_S2_MACS2_rendition_1E-8_downsampled_try3_peak_1877	591	16.017	59.107	56.1509	165
chr1	128997658	128997821	Project004-IPSHOCH-Exp5-ChIP-ES-CTCF-IP-Blobel-Rep2-S1_S2_MACS2_rendition_1E-8_downsampled_try3_peak_1878	127	7.65766	12.7801	10.457	103
chr1	129010996	129011239	Project004-IPSHOCH-Exp5-ChIP-ES-CTCF-IP-Blobel-Rep2-S1_S2_MACS2_rendition_1E-8_downsampled_try3_peak_1879	204	10.7207	20.4889	18.022	121
chr1	129101767	129102047	Project004-IPSHOCH-Exp5-ChIP-ES-CTCF-IP-Blobel-Rep2-S1_S2_MACS2_rendition_1E-8_downsampled_try3_peak_1880	512	19.4396	51.2866	48.4242	140
chr1	129135350	129135678	Project004-IPSHOCH-Exp5-ChIP-ES-CTCF-IP-Blobel-Rep2-S1_S2_MACS2_rendition_1E-8_downsampled_try3_peak_1881	510	16.25	51.0377	48.1789	175
chr1	129176869	129177154	Project004-IPSHOCH-Exp5-ChIP-ES-CTCF-IP-Blobel-Rep2-S1_S2_MACS2_rendition_1E-8_downsampled_try3_peak_1882	318	14.8048	31.8784	29.254	156
chr1	129226965	129227144	Project004-IPSHOCH-Exp5-ChIP-ES-CTCF-IP-Blobel-Rep2-S1_S2_MACS2_rendition_1E-8_downsampled_try3_peak_1883	204	10.7207	20.4889	18.022	67
chr1	129306130	129306517	Project004-IPSHOCH-Exp5-ChIP-ES-CTCF-IP-Blobel-Rep2-S1_S2_MACS2_rendition_1E-8_downsampled_try3_peak_1884	652	19.375	65.2077	62.179	229
chr1	129355642	129355932	Project004-IPSHOCH-Exp5-ChIP-ES-CTCF-IP-Blobel-Rep2-S1_S2_MACS2_rendition_1E-8_downsampled_try3_peak_1885	800	22.5	80.0747	76.8562	143
chr1	129380913	129381766	Project004-IPSHOCH-Exp5-ChIP-ES-CTCF-IP-Blobel-Rep2-S1_S2_MACS2_rendition_1E-8_downsampled_try3_peak_1886	1184	35.2703	118.483	114.736	664
chr1	129383734	129384179	Project004-IPSHOCH-Exp5-ChIP-ES-CTCF-IP-Blobel-Rep2-S1_S2_MACS2_rendition_1E-8_downsampled_try3_peak_1887	955	25.625	95.5421	92.1223	219
chr1	129393327	129393632	Project004-IPSHOCH-Exp5-ChIP-ES-CTCF-IP-Blobel-Rep2-S1_S2_MACS2_rendition_1E-8_downsampled_try3_peak_1888	1328	38.5135	132.843	128.876	174
chr1	129396807	129397183	Project004-IPSHOCH-Exp5-ChIP-ES-CTCF-IP-Blobel-Rep2-S1_S2_MACS2_rendition_1E-8_downsampled_try3_peak_1889	1330	32.8125	133.026	129.055	151
chr1	129576400	129576764	Project004-IPSHOCH-Exp5-ChIP-ES-CTCF-IP-Blobel-Rep2-S1_S2_MACS2_rendition_1E-8_downsampled_try3_peak_1890	1149	34.4595	114.941	111.245	176
chr1	129593135	129593458	Project004-IPSHOCH-Exp5-ChIP-ES-CTCF-IP-Blobel-Rep2-S1_S2_MACS2_rendition_1E-8_downsampled_try3_peak_1891	725	24.3243	72.5667	69.4469	161
chr1	129598851	129599050	Project004-IPSHOCH-Exp5-ChIP-ES-CTCF-IP-Blobel-Rep2-S1_S2_MACS2_rendition_1E-8_downsampled_try3_peak_1892	267	12.0957	26.7064	24.1524	110
chr1	129662160	129662404	Project004-IPSHOCH-Exp5-ChIP-ES-CTCF-IP-Blobel-Rep2-S1_S2_MACS2_rendition_1E-8_downsampled_try3_peak_1893	396	14.9619	39.6757	36.9525	133
chr1	129723876	129724292	Project004-IPSHOCH-Exp5-ChIP-ES-CTCF-IP-Blobel-Rep2-S1_S2_MACS2_rendition_1E-8_downsampled_try3_peak_1894	1016	29.9237	101.683	98.1811	185
chr1	129810961	129811159	Project004-IPSHOCH-Exp5-ChIP-ES-CTCF-IP-Blobel-Rep2-S1_S2_MACS2_rendition_1E-8_downsampled_try3_peak_1895	162	8.75001	16.2621	13.8752	83
chr1	129877303	129877473	Project004-IPSHOCH-Exp5-ChIP-ES-CTCF-IP-Blobel-Rep2-S1_S2_MACS2_rendition_1E-8_downsampled_try3_peak_1896	152	8.42868	15.279	12.9054	78
chr1	129944546	129944782	Project004-IPSHOCH-Exp5-ChIP-ES-CTCF-IP-Blobel-Rep2-S1_S2_MACS2_rendition_1E-8_downsampled_try3_peak_1897	242	9.6875	24.2245	21.7039	128
chr1	130063811	130063981	Project004-IPSHOCH-Exp5-ChIP-ES-CTCF-IP-Blobel-Rep2-S1_S2_MACS2_rendition_1E-8_downsampled_try3_peak_1898	135	7.10688	13.5254	11.1895	52
chr1	130119919	130120236	Project004-IPSHOCH-Exp5-ChIP-ES-CTCF-IP-Blobel-Rep2-S1_S2_MACS2_rendition_1E-8_downsampled_try3_peak_1899	402	13.75	40.2917	37.5643	154
chr1	130125745	130125974	Project004-IPSHOCH-Exp5-ChIP-ES-CTCF-IP-Blobel-Rep2-S1_S2_MACS2_rendition_1E-8_downsampled_try3_peak_1900	226	10.7443	22.6739	20.1801	145
chr1	130178392	130178715	Project004-IPSHOCH-Exp5-ChIP-ES-CTCF-IP-Blobel-Rep2-S1_S2_MACS2_rendition_1E-8_downsampled_try3_peak_1901	422	17.7224	42.2469	39.4973	145
chr1	130179539	130179856	Project004-IPSHOCH-Exp5-ChIP-ES-CTCF-IP-Blobel-Rep2-S1_S2_MACS2_rendition_1E-8_downsampled_try3_peak_1902	390	15.4054	39.0183	36.3047	155
chr1	130205710	130205881	Project004-IPSHOCH-Exp5-ChIP-ES-CTCF-IP-Blobel-Rep2-S1_S2_MACS2_rendition_1E-8_downsampled_try3_peak_1903	196	7.62712	19.6337	17.1839	91
chr1	130221543	130221707	Project004-IPSHOCH-Exp5-ChIP-ES-CTCF-IP-Blobel-Rep2-S1_S2_MACS2_rendition_1E-8_downsampled_try3_peak_1904	87	5	8.73763	6.52764	1
chr1	130244302	130244489	Project004-IPSHOCH-Exp5-ChIP-ES-CTCF-IP-Blobel-Rep2-S1_S2_MACS2_rendition_1E-8_downsampled_try3_peak_1905	214	10.9776	21.4286	18.954	77
chr1	130265328	130265628	Project004-IPSHOCH-Exp5-ChIP-ES-CTCF-IP-Blobel-Rep2-S1_S2_MACS2_rendition_1E-8_downsampled_try3_peak_1906	524	16.5625	52.4199	49.5431	153
chr1	130268817	130269043	Project004-IPSHOCH-Exp5-ChIP-ES-CTCF-IP-Blobel-Rep2-S1_S2_MACS2_rendition_1E-8_downsampled_try3_peak_1907	175	7.8125	17.5473	15.1358	100
chr1	130293033	130293248	Project004-IPSHOCH-Exp5-ChIP-ES-CTCF-IP-Blobel-Rep2-S1_S2_MACS2_rendition_1E-8_downsampled_try3_peak_1908	174	9.16011	17.4124	15.0038	53
chr1	130463589	130463765	Project004-IPSHOCH-Exp5-ChIP-ES-CTCF-IP-Blobel-Rep2-S1_S2_MACS2_rendition_1E-8_downsampled_try3_peak_1909	140	8.16817	14.0041	11.6555	38
chr1	130489032	130489402	Project004-IPSHOCH-Exp5-ChIP-ES-CTCF-IP-Blobel-Rep2-S1_S2_MACS2_rendition_1E-8_downsampled_try3_peak_1910	831	29.9028	83.1123	79.8591	197
chr1	130717211	130717383	Project004-IPSHOCH-Exp5-ChIP-ES-CTCF-IP-Blobel-Rep2-S1_S2_MACS2_rendition_1E-8_downsampled_try3_peak_1911	202	9.93578	20.2248	17.7696	74
chr1	130718276	130718545	Project004-IPSHOCH-Exp5-ChIP-ES-CTCF-IP-Blobel-Rep2-S1_S2_MACS2_rendition_1E-8_downsampled_try3_peak_1912	348	14.1892	34.8116	32.1534	126
chr1	130720818	130721205	Project004-IPSHOCH-Exp5-ChIP-ES-CTCF-IP-Blobel-Rep2-S1_S2_MACS2_rendition_1E-8_downsampled_try3_peak_1913	630	13.8889	63.0207	60.0181	167
chr1	130729161	130729499	Project004-IPSHOCH-Exp5-ChIP-ES-CTCF-IP-Blobel-Rep2-S1_S2_MACS2_rendition_1E-8_downsampled_try3_peak_1914	1036	36.2463	103.637	100.1	186
chr1	130771832	130772222	Project004-IPSHOCH-Exp5-ChIP-ES-CTCF-IP-Blobel-Rep2-S1_S2_MACS2_rendition_1E-8_downsampled_try3_peak_1915	1036	36.2463	103.637	100.1	192
chr1	130840311	130840554	Project004-IPSHOCH-Exp5-ChIP-ES-CTCF-IP-Blobel-Rep2-S1_S2_MACS2_rendition_1E-8_downsampled_try3_peak_1916	173	9.11023	17.3301	14.9216	118
chr1	130974901	130975227	Project004-IPSHOCH-Exp5-ChIP-ES-CTCF-IP-Blobel-Rep2-S1_S2_MACS2_rendition_1E-8_downsampled_try3_peak_1917	692	26.5465	69.2647	66.1871	157
chr1	131023552	131023743	Project004-IPSHOCH-Exp5-ChIP-ES-CTCF-IP-Blobel-Rep2-S1_S2_MACS2_rendition_1E-8_downsampled_try3_peak_1918	246	12.2523	24.6304	22.1021	72
chr1	131140943	131141359	Project004-IPSHOCH-Exp5-ChIP-ES-CTCF-IP-Blobel-Rep2-S1_S2_MACS2_rendition_1E-8_downsampled_try3_peak_1919	893	31.3132	89.3139	85.972	148
chr1	131247954	131248117	Project004-IPSHOCH-Exp5-ChIP-ES-CTCF-IP-Blobel-Rep2-S1_S2_MACS2_rendition_1E-8_downsampled_try3_peak_1920	149	8.19921	14.9025	12.5395	83
chr1	131387767	131388012	Project004-IPSHOCH-Exp5-ChIP-ES-CTCF-IP-Blobel-Rep2-S1_S2_MACS2_rendition_1E-8_downsampled_try3_peak_1921	191	10.2102	19.1475	16.7048	91
chr1	131398404	131398567	Project004-IPSHOCH-Exp5-ChIP-ES-CTCF-IP-Blobel-Rep2-S1_S2_MACS2_rendition_1E-8_downsampled_try3_peak_1922	134	7.2973	13.4146	11.0819	87
chr1	131723512	131723876	Project004-IPSHOCH-Exp5-ChIP-ES-CTCF-IP-Blobel-Rep2-S1_S2_MACS2_rendition_1E-8_downsampled_try3_peak_1923	362	14.5946	36.202	33.5264	218
chr1	131740037	131740376	Project004-IPSHOCH-Exp5-ChIP-ES-CTCF-IP-Blobel-Rep2-S1_S2_MACS2_rendition_1E-8_downsampled_try3_peak_1924	933	31.4303	93.3982	90.0057	156
chr1	131816047	131816248	Project004-IPSHOCH-Exp5-ChIP-ES-CTCF-IP-Blobel-Rep2-S1_S2_MACS2_rendition_1E-8_downsampled_try3_peak_1925	191	9.32432	19.1965	16.75	114
chr1	132063748	132064195	Project004-IPSHOCH-Exp5-ChIP-ES-CTCF-IP-Blobel-Rep2-S1_S2_MACS2_rendition_1E-8_downsampled_try3_peak_1926	677	23.1081	67.7527	64.6901	311
chr1	132089287	132089610	Project004-IPSHOCH-Exp5-ChIP-ES-CTCF-IP-Blobel-Rep2-S1_S2_MACS2_rendition_1E-8_downsampled_try3_peak_1927	442	18.8889	44.2197	41.4423	162
chr1	132171140	132171339	Project004-IPSHOCH-Exp5-ChIP-ES-CTCF-IP-Blobel-Rep2-S1_S2_MACS2_rendition_1E-8_downsampled_try3_peak_1928	222	10.1804	22.2776	19.7851	84
chr1	132238999	132239345	Project004-IPSHOCH-Exp5-ChIP-ES-CTCF-IP-Blobel-Rep2-S1_S2_MACS2_rendition_1E-8_downsampled_try3_peak_1929	506	20.9309	50.6795	47.8272	122
chr1	132246904	132247233	Project004-IPSHOCH-Exp5-ChIP-ES-CTCF-IP-Blobel-Rep2-S1_S2_MACS2_rendition_1E-8_downsampled_try3_peak_1930	1061	32.4324	106.177	102.605	159
chr1	132268759	132269065	Project004-IPSHOCH-Exp5-ChIP-ES-CTCF-IP-Blobel-Rep2-S1_S2_MACS2_rendition_1E-8_downsampled_try3_peak_1931	880	28.3437	88.037	84.7158	153
chr1	132358929	132359309	Project004-IPSHOCH-Exp5-ChIP-ES-CTCF-IP-Blobel-Rep2-S1_S2_MACS2_rendition_1E-8_downsampled_try3_peak_1932	834	16.8518	83.4664	80.2039	200
chr1	132444473	132444797	Project004-IPSHOCH-Exp5-ChIP-ES-CTCF-IP-Blobel-Rep2-S1_S2_MACS2_rendition_1E-8_downsampled_try3_peak_1933	688	25.286	68.8659	65.7947	173
chr1	132472582	132472837	Project004-IPSHOCH-Exp5-ChIP-ES-CTCF-IP-Blobel-Rep2-S1_S2_MACS2_rendition_1E-8_downsampled_try3_peak_1934	573	22.973	57.3068	54.371	145
chr1	132530496	132530994	Project004-IPSHOCH-Exp5-ChIP-ES-CTCF-IP-Blobel-Rep2-S1_S2_MACS2_rendition_1E-8_downsampled_try3_peak_1935	1605	44.5946	160.536	156.143	278
chr1	132588453	132588786	Project004-IPSHOCH-Exp5-ChIP-ES-CTCF-IP-Blobel-Rep2-S1_S2_MACS2_rendition_1E-8_downsampled_try3_peak_1936	600	23.1236	60.0284	57.0621	154
chr1	132673278	132673562	Project004-IPSHOCH-Exp5-ChIP-ES-CTCF-IP-Blobel-Rep2-S1_S2_MACS2_rendition_1E-8_downsampled_try3_peak_1937	378	15.9429	37.8066	35.1097	162
chr1	132680756	132681040	Project004-IPSHOCH-Exp5-ChIP-ES-CTCF-IP-Blobel-Rep2-S1_S2_MACS2_rendition_1E-8_downsampled_try3_peak_1938	448	12	44.8162	42.0322	135
chr1	132683660	132683925	Project004-IPSHOCH-Exp5-ChIP-ES-CTCF-IP-Blobel-Rep2-S1_S2_MACS2_rendition_1E-8_downsampled_try3_peak_1939	326	11.875	32.6367	30.0024	144
chr1	132693463	132693948	Project004-IPSHOCH-Exp5-ChIP-ES-CTCF-IP-Blobel-Rep2-S1_S2_MACS2_rendition_1E-8_downsampled_try3_peak_1940	614	23.4702	61.457	58.4734	297
chr1	132734964	132735164	Project004-IPSHOCH-Exp5-ChIP-ES-CTCF-IP-Blobel-Rep2-S1_S2_MACS2_rendition_1E-8_downsampled_try3_peak_1941	181	9.63484	18.1959	15.7686	79
chr1	132771502	132772082	Project004-IPSHOCH-Exp5-ChIP-ES-CTCF-IP-Blobel-Rep2-S1_S2_MACS2_rendition_1E-8_downsampled_try3_peak_1942	961	34.2042	96.1957	92.7608	375
chr1	132773449	132773923	Project004-IPSHOCH-Exp5-ChIP-ES-CTCF-IP-Blobel-Rep2-S1_S2_MACS2_rendition_1E-8_downsampled_try3_peak_1943	943	33.6937	94.3513	90.9421	243
chr1	132805082	132805263	Project004-IPSHOCH-Exp5-ChIP-ES-CTCF-IP-Blobel-Rep2-S1_S2_MACS2_rendition_1E-8_downsampled_try3_peak_1944	140	8.16817	14.0041	11.6555	67
chr1	132823172	132823362	Project004-IPSHOCH-Exp5-ChIP-ES-CTCF-IP-Blobel-Rep2-S1_S2_MACS2_rendition_1E-8_downsampled_try3_peak_1945	218	11.2312	21.8505	19.3628	94
chr1	132875978	132876413	Project004-IPSHOCH-Exp5-ChIP-ES-CTCF-IP-Blobel-Rep2-S1_S2_MACS2_rendition_1E-8_downsampled_try3_peak_1946	386	11.9491	38.6933	35.9859	254
chr1	132949849	132950213	Project004-IPSHOCH-Exp5-ChIP-ES-CTCF-IP-Blobel-Rep2-S1_S2_MACS2_rendition_1E-8_downsampled_try3_peak_1947	1313	32.5	131.347	127.404	173
chr1	132956738	132957173	Project004-IPSHOCH-Exp5-ChIP-ES-CTCF-IP-Blobel-Rep2-S1_S2_MACS2_rendition_1E-8_downsampled_try3_peak_1948	573	22.973	57.3068	54.371	249
chr1	133012483	133012844	Project004-IPSHOCH-Exp5-ChIP-ES-CTCF-IP-Blobel-Rep2-S1_S2_MACS2_rendition_1E-8_downsampled_try3_peak_1949	1304	43.3934	130.414	126.486	214
chr1	133015698	133015922	Project004-IPSHOCH-Exp5-ChIP-ES-CTCF-IP-Blobel-Rep2-S1_S2_MACS2_rendition_1E-8_downsampled_try3_peak_1950	156	6.61017	15.6784	13.2953	93
chr1	133018601	133018905	Project004-IPSHOCH-Exp5-ChIP-ES-CTCF-IP-Blobel-Rep2-S1_S2_MACS2_rendition_1E-8_downsampled_try3_peak_1951	784	19.5763	78.4324	75.2379	150
chr1	133051985	133052438	Project004-IPSHOCH-Exp5-ChIP-ES-CTCF-IP-Blobel-Rep2-S1_S2_MACS2_rendition_1E-8_downsampled_try3_peak_1952	1475	38.6681	147.507	143.317	247
chr1	133058632	133058813	Project004-IPSHOCH-Exp5-ChIP-ES-CTCF-IP-Blobel-Rep2-S1_S2_MACS2_rendition_1E-8_downsampled_try3_peak_1953	170	6.42857	17.0335	14.6269	119
chr1	133078194	133078583	Project004-IPSHOCH-Exp5-ChIP-ES-CTCF-IP-Blobel-Rep2-S1_S2_MACS2_rendition_1E-8_downsampled_try3_peak_1954	1177	23.5714	117.709	113.974	207
chr1	133096648	133096837	Project004-IPSHOCH-Exp5-ChIP-ES-CTCF-IP-Blobel-Rep2-S1_S2_MACS2_rendition_1E-8_downsampled_try3_peak_1955	259	10.6436	25.989	23.4472	75
chr1	133104103	133104476	Project004-IPSHOCH-Exp5-ChIP-ES-CTCF-IP-Blobel-Rep2-S1_S2_MACS2_rendition_1E-8_downsampled_try3_peak_1956	1493	46.729	149.368	145.15	152
chr1	133142363	133142821	Project004-IPSHOCH-Exp5-ChIP-ES-CTCF-IP-Blobel-Rep2-S1_S2_MACS2_rendition_1E-8_downsampled_try3_peak_1957	815	22.8125	81.5958	78.3612	282
chr1	133143040	133143302	Project004-IPSHOCH-Exp5-ChIP-ES-CTCF-IP-Blobel-Rep2-S1_S2_MACS2_rendition_1E-8_downsampled_try3_peak_1958	567	20.2703	56.7908	53.8633	121
chr1	133156943	133157360	Project004-IPSHOCH-Exp5-ChIP-ES-CTCF-IP-Blobel-Rep2-S1_S2_MACS2_rendition_1E-8_downsampled_try3_peak_1959	1447	41.4887	144.767	140.624	199
chr1	133166779	133167187	Project004-IPSHOCH-Exp5-ChIP-ES-CTCF-IP-Blobel-Rep2-S1_S2_MACS2_rendition_1E-8_downsampled_try3_peak_1960	1264	34.3716	126.423	122.559	234
chr1	133171391	133171600	Project004-IPSHOCH-Exp5-ChIP-ES-CTCF-IP-Blobel-Rep2-S1_S2_MACS2_rendition_1E-8_downsampled_try3_peak_1961	243	11.7724	24.3941	21.8729	126
chr1	133187245	133187596	Project004-IPSHOCH-Exp5-ChIP-ES-CTCF-IP-Blobel-Rep2-S1_S2_MACS2_rendition_1E-8_downsampled_try3_peak_1962	1104	33.6839	110.445	106.815	141
chr1	133225757	133226035	Project004-IPSHOCH-Exp5-ChIP-ES-CTCF-IP-Blobel-Rep2-S1_S2_MACS2_rendition_1E-8_downsampled_try3_peak_1963	472	18.4291	47.2014	44.3918	131
chr1	133444944	133445243	Project004-IPSHOCH-Exp5-ChIP-ES-CTCF-IP-Blobel-Rep2-S1_S2_MACS2_rendition_1E-8_downsampled_try3_peak_1964	339	10.9322	33.9286	31.2765	162
chr1	133445706	133445871	Project004-IPSHOCH-Exp5-ChIP-ES-CTCF-IP-Blobel-Rep2-S1_S2_MACS2_rendition_1E-8_downsampled_try3_peak_1965	114	5.9375	11.4842	9.19838	54
chr1	133451774	133452069	Project004-IPSHOCH-Exp5-ChIP-ES-CTCF-IP-Blobel-Rep2-S1_S2_MACS2_rendition_1E-8_downsampled_try3_peak_1966	873	27.973	87.3842	84.0695	132
chr1	133462764	133463009	Project004-IPSHOCH-Exp5-ChIP-ES-CTCF-IP-Blobel-Rep2-S1_S2_MACS2_rendition_1E-8_downsampled_try3_peak_1967	508	20.1352	50.8888	48.0323	137
chr1	133496921	133497251	Project004-IPSHOCH-Exp5-ChIP-ES-CTCF-IP-Blobel-Rep2-S1_S2_MACS2_rendition_1E-8_downsampled_try3_peak_1968	785	22.1875	78.5596	75.3623	182
chr1	133509967	133510298	Project004-IPSHOCH-Exp5-ChIP-ES-CTCF-IP-Blobel-Rep2-S1_S2_MACS2_rendition_1E-8_downsampled_try3_peak_1969	882	23.845	88.2408	84.9183	139
chr1	133515215	133515490	Project004-IPSHOCH-Exp5-ChIP-ES-CTCF-IP-Blobel-Rep2-S1_S2_MACS2_rendition_1E-8_downsampled_try3_peak_1970	274	13.2733	27.4811	24.914	156
chr1	133554583	133555060	Project004-IPSHOCH-Exp5-ChIP-ES-CTCF-IP-Blobel-Rep2-S1_S2_MACS2_rendition_1E-8_downsampled_try3_peak_1971	1561	35.6862	156.137	151.821	295
chr1	133598015	133598315	Project004-IPSHOCH-Exp5-ChIP-ES-CTCF-IP-Blobel-Rep2-S1_S2_MACS2_rendition_1E-8_downsampled_try3_peak_1972	684	25.5323	68.4076	65.3397	152
chr1	133604944	133605328	Project004-IPSHOCH-Exp5-ChIP-ES-CTCF-IP-Blobel-Rep2-S1_S2_MACS2_rendition_1E-8_downsampled_try3_peak_1973	1374	44.9456	137.413	133.381	177
chr1	133608914	133609381	Project004-IPSHOCH-Exp5-ChIP-ES-CTCF-IP-Blobel-Rep2-S1_S2_MACS2_rendition_1E-8_downsampled_try3_peak_1974	951	31.8858	95.1659	91.7501	258
chr1	133611490	133611881	Project004-IPSHOCH-Exp5-ChIP-ES-CTCF-IP-Blobel-Rep2-S1_S2_MACS2_rendition_1E-8_downsampled_try3_peak_1975	490	20.4204	49.0482	46.2139	231
chr1	133612407	133612613	Project004-IPSHOCH-Exp5-ChIP-ES-CTCF-IP-Blobel-Rep2-S1_S2_MACS2_rendition_1E-8_downsampled_try3_peak_1976	165	9.18919	16.529	14.131	108
chr1	133660330	133660501	Project004-IPSHOCH-Exp5-ChIP-ES-CTCF-IP-Blobel-Rep2-S1_S2_MACS2_rendition_1E-8_downsampled_try3_peak_1977	189	8.58359	18.9479	16.5138	97
chr1	133662092	133662555	Project004-IPSHOCH-Exp5-ChIP-ES-CTCF-IP-Blobel-Rep2-S1_S2_MACS2_rendition_1E-8_downsampled_try3_peak_1978	1431	34.6875	143.184	139.063	268
chr1	133710798	133711091	Project004-IPSHOCH-Exp5-ChIP-ES-CTCF-IP-Blobel-Rep2-S1_S2_MACS2_rendition_1E-8_downsampled_try3_peak_1979	442	14.6875	44.2539	41.4744	143
chr1	133742932	133743273	Project004-IPSHOCH-Exp5-ChIP-ES-CTCF-IP-Blobel-Rep2-S1_S2_MACS2_rendition_1E-8_downsampled_try3_peak_1980	908	24.6875	90.8436	87.4807	143
chr1	133763580	133764061	Project004-IPSHOCH-Exp5-ChIP-ES-CTCF-IP-Blobel-Rep2-S1_S2_MACS2_rendition_1E-8_downsampled_try3_peak_1981	1344	27.6766	134.453	130.465	264
chr1	133772225	133772489	Project004-IPSHOCH-Exp5-ChIP-ES-CTCF-IP-Blobel-Rep2-S1_S2_MACS2_rendition_1E-8_downsampled_try3_peak_1982	270	9.40678	27.0855	24.5258	136
chr1	133775324	133775507	Project004-IPSHOCH-Exp5-ChIP-ES-CTCF-IP-Blobel-Rep2-S1_S2_MACS2_rendition_1E-8_downsampled_try3_peak_1983	149	8.19921	14.9025	12.5395	75
chr1	133779387	133779821	Project004-IPSHOCH-Exp5-ChIP-ES-CTCF-IP-Blobel-Rep2-S1_S2_MACS2_rendition_1E-8_downsampled_try3_peak_1984	1489	41.3064	148.949	144.74	171
chr1	133780459	133780703	Project004-IPSHOCH-Exp5-ChIP-ES-CTCF-IP-Blobel-Rep2-S1_S2_MACS2_rendition_1E-8_downsampled_try3_peak_1985	186	7.37288	18.6225	16.19	108
chr1	133801995	133802424	Project004-IPSHOCH-Exp5-ChIP-ES-CTCF-IP-Blobel-Rep2-S1_S2_MACS2_rendition_1E-8_downsampled_try3_peak_1986	429	14.375	42.9238	40.1617	225
chr1	133805973	133806149	Project004-IPSHOCH-Exp5-ChIP-ES-CTCF-IP-Blobel-Rep2-S1_S2_MACS2_rendition_1E-8_downsampled_try3_peak_1987	187	9.04807	18.7276	16.2944	123
chr1	133834150	133834766	Project004-IPSHOCH-Exp5-ChIP-ES-CTCF-IP-Blobel-Rep2-S1_S2_MACS2_rendition_1E-8_downsampled_try3_peak_1988	917	19.7143	91.7567	88.3871	303
chr1	133845568	133845796	Project004-IPSHOCH-Exp5-ChIP-ES-CTCF-IP-Blobel-Rep2-S1_S2_MACS2_rendition_1E-8_downsampled_try3_peak_1989	139	8.12917	13.9401	11.6003	77
chr1	133878110	133878618	Project004-IPSHOCH-Exp5-ChIP-ES-CTCF-IP-Blobel-Rep2-S1_S2_MACS2_rendition_1E-8_downsampled_try3_peak_1990	1765	55.1351	176.507	171.885	317
chr1	133879380	133879841	Project004-IPSHOCH-Exp5-ChIP-ES-CTCF-IP-Blobel-Rep2-S1_S2_MACS2_rendition_1E-8_downsampled_try3_peak_1991	1914	48.626	191.462	186.639	253
chr1	133891623	133891964	Project004-IPSHOCH-Exp5-ChIP-ES-CTCF-IP-Blobel-Rep2-S1_S2_MACS2_rendition_1E-8_downsampled_try3_peak_1992	957	31.652	95.7509	92.3298	200
chr1	133897075	133897450	Project004-IPSHOCH-Exp5-ChIP-ES-CTCF-IP-Blobel-Rep2-S1_S2_MACS2_rendition_1E-8_downsampled_try3_peak_1993	910	30.6411	91.0622	87.699	187
chr1	133911468	133911745	Project004-IPSHOCH-Exp5-ChIP-ES-CTCF-IP-Blobel-Rep2-S1_S2_MACS2_rendition_1E-8_downsampled_try3_peak_1994	407	16.4156	40.7572	38.025	92
chr1	133927254	133927524	Project004-IPSHOCH-Exp5-ChIP-ES-CTCF-IP-Blobel-Rep2-S1_S2_MACS2_rendition_1E-8_downsampled_try3_peak_1995	326	11.875	32.6367	30.0024	78
chr1	133942078	133942257	Project004-IPSHOCH-Exp5-ChIP-ES-CTCF-IP-Blobel-Rep2-S1_S2_MACS2_rendition_1E-8_downsampled_try3_peak_1996	123	6.89189	12.3237	10.0163	95
chr1	133942926	133943339	Project004-IPSHOCH-Exp5-ChIP-ES-CTCF-IP-Blobel-Rep2-S1_S2_MACS2_rendition_1E-8_downsampled_try3_peak_1997	1149	34.4595	114.941	111.245	242
[truncated: 48,188 more rows]
