# Supplementary material for: YY1 and CTCF orchestrate a 3D chromatin looping switch during early neural lineage commitment
Source: HighWire-hosted journal article supplement (doi:10.1101/gr.215160.116), 2017-05-23
Supplement: Supplemental_Table_S7.xlsx [file Supplemental_Table_S7.xlsx]

## Sheet: NPC-CTCF-IP-Blobel-Rep2-S1_S8_p
Beagan et al. 2017
Table S7, Significant CTCF Peaks in NPCs
#chr	start	end	name	score	signalValue	pValue	qValue	peak
chr1	4322662	4322893	Project004-IPSHOCH-Exp5-ChIP-NPC-CTCF-IP-Blobel-Rep2-S1_S8_peakcall_MACS2_rendition_1E-8_downsampled_try3_peak_1	144	6.875	14.4294	11.6384	113
chr1	4336371	4336522	Project004-IPSHOCH-Exp5-ChIP-NPC-CTCF-IP-Blobel-Rep2-S1_S8_peakcall_MACS2_rendition_1E-8_downsampled_try3_peak_2	179	8.91892	17.9999	15.1172	105
chr1	4373031	4373165	Project004-IPSHOCH-Exp5-ChIP-NPC-CTCF-IP-Blobel-Rep2-S1_S8_peakcall_MACS2_rendition_1E-8_downsampled_try3_peak_3	179	8.91892	17.9999	15.1172	35
chr1	4506748	4506933	Project004-IPSHOCH-Exp5-ChIP-NPC-CTCF-IP-Blobel-Rep2-S1_S8_peakcall_MACS2_rendition_1E-8_downsampled_try3_peak_4	402	18.2139	40.2689	36.92	64
chr1	4758436	4758774	Project004-IPSHOCH-Exp5-ChIP-NPC-CTCF-IP-Blobel-Rep2-S1_S8_peakcall_MACS2_rendition_1E-8_downsampled_try3_peak_5	790	25.9459	79.0852	74.763	201
chr1	4760014	4760233	Project004-IPSHOCH-Exp5-ChIP-NPC-CTCF-IP-Blobel-Rep2-S1_S8_peakcall_MACS2_rendition_1E-8_downsampled_try3_peak_6	339	10.9322	33.9286	30.7076	116
chr1	4770295	4770481	Project004-IPSHOCH-Exp5-ChIP-NPC-CTCF-IP-Blobel-Rep2-S1_S8_peakcall_MACS2_rendition_1E-8_downsampled_try3_peak_7	204	9.72973	20.4115	17.4743	87
chr1	5008053	5008197	Project004-IPSHOCH-Exp5-ChIP-NPC-CTCF-IP-Blobel-Rep2-S1_S8_peakcall_MACS2_rendition_1E-8_downsampled_try3_peak_8	267	11.7568	26.7382	23.6677	111
chr1	5060402	5060614	Project004-IPSHOCH-Exp5-ChIP-NPC-CTCF-IP-Blobel-Rep2-S1_S8_peakcall_MACS2_rendition_1E-8_downsampled_try3_peak_9	289	10.9375	28.9576	25.8462	99
chr1	5093330	5093487	Project004-IPSHOCH-Exp5-ChIP-NPC-CTCF-IP-Blobel-Rep2-S1_S8_peakcall_MACS2_rendition_1E-8_downsampled_try3_peak_10	241	10.9459	24.1597	21.1477	89
chr1	5895010	5895179	Project004-IPSHOCH-Exp5-ChIP-NPC-CTCF-IP-Blobel-Rep2-S1_S8_peakcall_MACS2_rendition_1E-8_downsampled_try3_peak_11	199	10.9615	19.9467	17.0228	65
chr1	6125257	6125442	Project004-IPSHOCH-Exp5-ChIP-NPC-CTCF-IP-Blobel-Rep2-S1_S8_peakcall_MACS2_rendition_1E-8_downsampled_try3_peak_12	452	20.3072	45.2387	41.7737	95
chr1	6262447	6262599	Project004-IPSHOCH-Exp5-ChIP-NPC-CTCF-IP-Blobel-Rep2-S1_S8_peakcall_MACS2_rendition_1E-8_downsampled_try3_peak_13	246	12.5694	24.6208	21.5948	77
chr1	6391700	6391895	Project004-IPSHOCH-Exp5-ChIP-NPC-CTCF-IP-Blobel-Rep2-S1_S8_peakcall_MACS2_rendition_1E-8_downsampled_try3_peak_14	273	13.8461	27.331	24.2518	93
chr1	6396456	6396702	Project004-IPSHOCH-Exp5-ChIP-NPC-CTCF-IP-Blobel-Rep2-S1_S8_peakcall_MACS2_rendition_1E-8_downsampled_try3_peak_15	270	9.40678	27.0855	24.0124	146
chr1	6400257	6400440	Project004-IPSHOCH-Exp5-ChIP-NPC-CTCF-IP-Blobel-Rep2-S1_S8_peakcall_MACS2_rendition_1E-8_downsampled_try3_peak_16	305	15.0853	30.5622	27.4146	92
chr1	6473396	6473729	Project004-IPSHOCH-Exp5-ChIP-NPC-CTCF-IP-Blobel-Rep2-S1_S8_peakcall_MACS2_rendition_1E-8_downsampled_try3_peak_17	321	15.6655	32.1345	28.9516	144
chr1	6849173	6849457	Project004-IPSHOCH-Exp5-ChIP-NPC-CTCF-IP-Blobel-Rep2-S1_S8_peakcall_MACS2_rendition_1E-8_downsampled_try3_peak_18	619	24.7108	61.9014	58.0414	119
chr1	7000356	7000508	Project004-IPSHOCH-Exp5-ChIP-NPC-CTCF-IP-Blobel-Rep2-S1_S8_peakcall_MACS2_rendition_1E-8_downsampled_try3_peak_19	213	11.5385	21.3832	18.4295	84
chr1	7194963	7195125	Project004-IPSHOCH-Exp5-ChIP-NPC-CTCF-IP-Blobel-Rep2-S1_S8_peakcall_MACS2_rendition_1E-8_downsampled_try3_peak_20	248	8.8983	24.8937	21.8632	69
chr1	7209091	7209289	Project004-IPSHOCH-Exp5-ChIP-NPC-CTCF-IP-Blobel-Rep2-S1_S8_peakcall_MACS2_rendition_1E-8_downsampled_try3_peak_21	229	12.1843	22.9595	19.9656	95
chr1	7387028	7387315	Project004-IPSHOCH-Exp5-ChIP-NPC-CTCF-IP-Blobel-Rep2-S1_S8_peakcall_MACS2_rendition_1E-8_downsampled_try3_peak_22	849	33.0717	84.9275	80.4532	111
chr1	7387421	7387629	Project004-IPSHOCH-Exp5-ChIP-NPC-CTCF-IP-Blobel-Rep2-S1_S8_peakcall_MACS2_rendition_1E-8_downsampled_try3_peak_23	384	15.9095	38.4558	35.1472	105
chr1	7388278	7388572	Project004-IPSHOCH-Exp5-ChIP-NPC-CTCF-IP-Blobel-Rep2-S1_S8_peakcall_MACS2_rendition_1E-8_downsampled_try3_peak_24	468	20.4217	46.8323	43.3369	177
chr1	7533670	7533851	Project004-IPSHOCH-Exp5-ChIP-NPC-CTCF-IP-Blobel-Rep2-S1_S8_peakcall_MACS2_rendition_1E-8_downsampled_try3_peak_25	243	12.6923	24.3186	21.2979	83
chr1	8668913	8669057	Project004-IPSHOCH-Exp5-ChIP-NPC-CTCF-IP-Blobel-Rep2-S1_S8_peakcall_MACS2_rendition_1E-8_downsampled_try3_peak_26	185	10.3846	18.5323	15.6407	77
chr1	9091033	9091181	Project004-IPSHOCH-Exp5-ChIP-NPC-CTCF-IP-Blobel-Rep2-S1_S8_peakcall_MACS2_rendition_1E-8_downsampled_try3_peak_27	186	10.4437	18.6335	15.7332	61
chr1	9531340	9531640	Project004-IPSHOCH-Exp5-ChIP-NPC-CTCF-IP-Blobel-Rep2-S1_S8_peakcall_MACS2_rendition_1E-8_downsampled_try3_peak_28	857	27.5676	85.7116	81.2193	181
chr1	9539166	9539359	Project004-IPSHOCH-Exp5-ChIP-NPC-CTCF-IP-Blobel-Rep2-S1_S8_peakcall_MACS2_rendition_1E-8_downsampled_try3_peak_29	364	14.7348	36.4443	33.1742	77
chr1	9563375	9563580	Project004-IPSHOCH-Exp5-ChIP-NPC-CTCF-IP-Blobel-Rep2-S1_S8_peakcall_MACS2_rendition_1E-8_downsampled_try3_peak_30	640	25.4782	64.0411	60.13	107
chr1	9611580	9611746	Project004-IPSHOCH-Exp5-ChIP-NPC-CTCF-IP-Blobel-Rep2-S1_S8_peakcall_MACS2_rendition_1E-8_downsampled_try3_peak_31	368	13.403	36.8468	33.5705	88
chr1	9685675	9685802	Project004-IPSHOCH-Exp5-ChIP-NPC-CTCF-IP-Blobel-Rep2-S1_S8_peakcall_MACS2_rendition_1E-8_downsampled_try3_peak_32	144	8.65385	14.4351	11.6391	49
chr1	9686979	9687255	Project004-IPSHOCH-Exp5-ChIP-NPC-CTCF-IP-Blobel-Rep2-S1_S8_peakcall_MACS2_rendition_1E-8_downsampled_try3_peak_33	545	23.2071	54.5798	50.9044	94
chr1	9693246	9693415	Project004-IPSHOCH-Exp5-ChIP-NPC-CTCF-IP-Blobel-Rep2-S1_S8_peakcall_MACS2_rendition_1E-8_downsampled_try3_peak_34	274	13.9249	27.4672	24.3835	83
chr1	9762932	9763164	Project004-IPSHOCH-Exp5-ChIP-NPC-CTCF-IP-Blobel-Rep2-S1_S8_peakcall_MACS2_rendition_1E-8_downsampled_try3_peak_35	580	17.8125	58.0283	54.2689	100
chr1	9997366	9997608	Project004-IPSHOCH-Exp5-ChIP-NPC-CTCF-IP-Blobel-Rep2-S1_S8_peakcall_MACS2_rendition_1E-8_downsampled_try3_peak_36	754	28.1096	75.4656	71.2507	120
chr1	10029627	10029834	Project004-IPSHOCH-Exp5-ChIP-NPC-CTCF-IP-Blobel-Rep2-S1_S8_peakcall_MACS2_rendition_1E-8_downsampled_try3_peak_37	632	24.0108	63.2244	59.3291	98
chr1	10079712	10079925	Project004-IPSHOCH-Exp5-ChIP-NPC-CTCF-IP-Blobel-Rep2-S1_S8_peakcall_MACS2_rendition_1E-8_downsampled_try3_peak_38	386	11.9491	38.6933	35.377	108
chr1	10478373	10478596	Project004-IPSHOCH-Exp5-ChIP-NPC-CTCF-IP-Blobel-Rep2-S1_S8_peakcall_MACS2_rendition_1E-8_downsampled_try3_peak_39	243	12.6923	24.3186	21.2979	115
chr1	10749739	10749914	Project004-IPSHOCH-Exp5-ChIP-NPC-CTCF-IP-Blobel-Rep2-S1_S8_peakcall_MACS2_rendition_1E-8_downsampled_try3_peak_40	385	17.9864	38.5762	35.2632	108
chr1	10825834	10826050	Project004-IPSHOCH-Exp5-ChIP-NPC-CTCF-IP-Blobel-Rep2-S1_S8_peakcall_MACS2_rendition_1E-8_downsampled_try3_peak_41	435	19.727	43.5538	40.1273	118
chr1	11130137	11130260	Project004-IPSHOCH-Exp5-ChIP-NPC-CTCF-IP-Blobel-Rep2-S1_S8_peakcall_MACS2_rendition_1E-8_downsampled_try3_peak_42	196	10.5152	19.6547	16.7388	44
chr1	11224053	11224247	Project004-IPSHOCH-Exp5-ChIP-NPC-CTCF-IP-Blobel-Rep2-S1_S8_peakcall_MACS2_rendition_1E-8_downsampled_try3_peak_43	290	14.5051	29.0062	25.8892	79
chr1	11404234	11404432	Project004-IPSHOCH-Exp5-ChIP-NPC-CTCF-IP-Blobel-Rep2-S1_S8_peakcall_MACS2_rendition_1E-8_downsampled_try3_peak_44	402	18.5665	40.2222	36.8751	91
chr1	11456545	11456712	Project004-IPSHOCH-Exp5-ChIP-NPC-CTCF-IP-Blobel-Rep2-S1_S8_peakcall_MACS2_rendition_1E-8_downsampled_try3_peak_45	273	13.8461	27.331	24.2518	71
chr1	11555531	11555705	Project004-IPSHOCH-Exp5-ChIP-NPC-CTCF-IP-Blobel-Rep2-S1_S8_peakcall_MACS2_rendition_1E-8_downsampled_try3_peak_46	266	13.1441	26.6869	23.6222	75
chr1	11647850	11648070	Project004-IPSHOCH-Exp5-ChIP-NPC-CTCF-IP-Blobel-Rep2-S1_S8_peakcall_MACS2_rendition_1E-8_downsampled_try3_peak_47	299	14.0548	29.9952	26.8632	102
chr1	12018323	12018449	Project004-IPSHOCH-Exp5-ChIP-NPC-CTCF-IP-Blobel-Rep2-S1_S8_peakcall_MACS2_rendition_1E-8_downsampled_try3_peak_48	158	9.28328	15.8647	13.0259	58
chr1	12826964	12827225	Project004-IPSHOCH-Exp5-ChIP-NPC-CTCF-IP-Blobel-Rep2-S1_S8_peakcall_MACS2_rendition_1E-8_downsampled_try3_peak_49	648	24.491	64.8978	60.9594	92
chr1	12854217	12854408	Project004-IPSHOCH-Exp5-ChIP-NPC-CTCF-IP-Blobel-Rep2-S1_S8_peakcall_MACS2_rendition_1E-8_downsampled_try3_peak_50	522	19.0541	52.2186	48.5899	99
chr1	13040304	13040513	Project004-IPSHOCH-Exp5-ChIP-NPC-CTCF-IP-Blobel-Rep2-S1_S8_peakcall_MACS2_rendition_1E-8_downsampled_try3_peak_51	537	19.4595	53.7338	50.0722	100
chr1	13042157	13042327	Project004-IPSHOCH-Exp5-ChIP-NPC-CTCF-IP-Blobel-Rep2-S1_S8_peakcall_MACS2_rendition_1E-8_downsampled_try3_peak_52	311	14.7213	31.1164	27.9578	74
chr1	13124474	13124808	Project004-IPSHOCH-Exp5-ChIP-NPC-CTCF-IP-Blobel-Rep2-S1_S8_peakcall_MACS2_rendition_1E-8_downsampled_try3_peak_53	376	15	37.6044	34.309	112
chr1	13141229	13141415	Project004-IPSHOCH-Exp5-ChIP-NPC-CTCF-IP-Blobel-Rep2-S1_S8_peakcall_MACS2_rendition_1E-8_downsampled_try3_peak_54	230	9.375	23.0745	20.0771	79
chr1	13363071	13363194	Project004-IPSHOCH-Exp5-ChIP-NPC-CTCF-IP-Blobel-Rep2-S1_S8_peakcall_MACS2_rendition_1E-8_downsampled_try3_peak_55	151	8.61126	15.1433	12.329	105
chr1	13490662	13490837	Project004-IPSHOCH-Exp5-ChIP-NPC-CTCF-IP-Blobel-Rep2-S1_S8_peakcall_MACS2_rendition_1E-8_downsampled_try3_peak_56	290	14.5051	29.0062	25.8892	81
chr1	13521687	13521886	Project004-IPSHOCH-Exp5-ChIP-NPC-CTCF-IP-Blobel-Rep2-S1_S8_peakcall_MACS2_rendition_1E-8_downsampled_try3_peak_57	474	18.5611	47.4271	43.9155	95
chr1	13579937	13580215	Project004-IPSHOCH-Exp5-ChIP-NPC-CTCF-IP-Blobel-Rep2-S1_S8_peakcall_MACS2_rendition_1E-8_downsampled_try3_peak_58	790	25.9459	79.0852	74.763	178
chr1	13649941	13650072	Project004-IPSHOCH-Exp5-ChIP-NPC-CTCF-IP-Blobel-Rep2-S1_S8_peakcall_MACS2_rendition_1E-8_downsampled_try3_peak_59	119	5.59322	11.9839	9.24856	100
chr1	13696496	13696734	Project004-IPSHOCH-Exp5-ChIP-NPC-CTCF-IP-Blobel-Rep2-S1_S8_peakcall_MACS2_rendition_1E-8_downsampled_try3_peak_60	402	13.75	40.2917	36.9391	97
chr1	13774575	13774828	Project004-IPSHOCH-Exp5-ChIP-NPC-CTCF-IP-Blobel-Rep2-S1_S8_peakcall_MACS2_rendition_1E-8_downsampled_try3_peak_61	495	17.1184	49.5617	46.0053	117
chr1	13779325	13779609	Project004-IPSHOCH-Exp5-ChIP-NPC-CTCF-IP-Blobel-Rep2-S1_S8_peakcall_MACS2_rendition_1E-8_downsampled_try3_peak_62	509	12.037	50.9729	47.3804	157
chr1	14719185	14719416	Project004-IPSHOCH-Exp5-ChIP-NPC-CTCF-IP-Blobel-Rep2-S1_S8_peakcall_MACS2_rendition_1E-8_downsampled_try3_peak_63	467	20.7692	46.7295	43.238	106
chr1	14730225	14730411	Project004-IPSHOCH-Exp5-ChIP-NPC-CTCF-IP-Blobel-Rep2-S1_S8_peakcall_MACS2_rendition_1E-8_downsampled_try3_peak_64	404	15.8108	40.4434	37.0817	83
chr1	14997783	14997996	Project004-IPSHOCH-Exp5-ChIP-NPC-CTCF-IP-Blobel-Rep2-S1_S8_peakcall_MACS2_rendition_1E-8_downsampled_try3_peak_65	501	21.9231	50.1473	46.5747	103
chr1	15612071	15612305	Project004-IPSHOCH-Exp5-ChIP-NPC-CTCF-IP-Blobel-Rep2-S1_S8_peakcall_MACS2_rendition_1E-8_downsampled_try3_peak_66	451	19.4532	45.1774	41.7168	114
chr1	15673805	15673964	Project004-IPSHOCH-Exp5-ChIP-NPC-CTCF-IP-Blobel-Rep2-S1_S8_peakcall_MACS2_rendition_1E-8_downsampled_try3_peak_67	369	17.4061	36.944	33.6632	75
chr1	15782065	15782310	Project004-IPSHOCH-Exp5-ChIP-NPC-CTCF-IP-Blobel-Rep2-S1_S8_peakcall_MACS2_rendition_1E-8_downsampled_try3_peak_68	321	15.6655	32.1345	28.9516	173
chr1	15865280	15865419	Project004-IPSHOCH-Exp5-ChIP-NPC-CTCF-IP-Blobel-Rep2-S1_S8_peakcall_MACS2_rendition_1E-8_downsampled_try3_peak_69	243	12.6923	24.3186	21.2979	54
chr1	15892644	15892820	Project004-IPSHOCH-Exp5-ChIP-NPC-CTCF-IP-Blobel-Rep2-S1_S8_peakcall_MACS2_rendition_1E-8_downsampled_try3_peak_70	243	12.6923	24.3186	21.2979	70
chr1	16095697	16095979	Project004-IPSHOCH-Exp5-ChIP-NPC-CTCF-IP-Blobel-Rep2-S1_S8_peakcall_MACS2_rendition_1E-8_downsampled_try3_peak_71	156	6.61017	15.6784	12.8526	197
chr1	16295092	16295248	Project004-IPSHOCH-Exp5-ChIP-NPC-CTCF-IP-Blobel-Rep2-S1_S8_peakcall_MACS2_rendition_1E-8_downsampled_try3_peak_72	214	11.6041	21.496	18.5379	72
chr1	16423549	16423773	Project004-IPSHOCH-Exp5-ChIP-NPC-CTCF-IP-Blobel-Rep2-S1_S8_peakcall_MACS2_rendition_1E-8_downsampled_try3_peak_73	609	25.529	60.9157	57.0767	138
chr1	16430388	16430548	Project004-IPSHOCH-Exp5-ChIP-NPC-CTCF-IP-Blobel-Rep2-S1_S8_peakcall_MACS2_rendition_1E-8_downsampled_try3_peak_74	289	10.9375	28.9576	25.8462	54
chr1	16509791	16509932	Project004-IPSHOCH-Exp5-ChIP-NPC-CTCF-IP-Blobel-Rep2-S1_S8_peakcall_MACS2_rendition_1E-8_downsampled_try3_peak_75	244	11.4902	24.4986	21.4727	80
chr1	16736187	16736424	Project004-IPSHOCH-Exp5-ChIP-NPC-CTCF-IP-Blobel-Rep2-S1_S8_peakcall_MACS2_rendition_1E-8_downsampled_try3_peak_76	468	20.4217	46.8323	43.3369	114
chr1	16788406	16788730	Project004-IPSHOCH-Exp5-ChIP-NPC-CTCF-IP-Blobel-Rep2-S1_S8_peakcall_MACS2_rendition_1E-8_downsampled_try3_peak_77	411	12.4576	41.1311	37.7632	166
chr1	17113594	17113840	Project004-IPSHOCH-Exp5-ChIP-NPC-CTCF-IP-Blobel-Rep2-S1_S8_peakcall_MACS2_rendition_1E-8_downsampled_try3_peak_78	326	11.875	32.6367	29.4451	118
chr1	17153683	17153918	Project004-IPSHOCH-Exp5-ChIP-NPC-CTCF-IP-Blobel-Rep2-S1_S8_peakcall_MACS2_rendition_1E-8_downsampled_try3_peak_79	518	22.0775	51.8776	48.2644	114
chr1	17970803	17970978	Project004-IPSHOCH-Exp5-ChIP-NPC-CTCF-IP-Blobel-Rep2-S1_S8_peakcall_MACS2_rendition_1E-8_downsampled_try3_peak_80	293	12.5676	29.3754	26.2484	70
chr1	18003018	18003362	Project004-IPSHOCH-Exp5-ChIP-NPC-CTCF-IP-Blobel-Rep2-S1_S8_peakcall_MACS2_rendition_1E-8_downsampled_try3_peak_81	273	13.8461	27.331	24.2518	72
chr1	18096351	18096573	Project004-IPSHOCH-Exp5-ChIP-NPC-CTCF-IP-Blobel-Rep2-S1_S8_peakcall_MACS2_rendition_1E-8_downsampled_try3_peak_82	501	21.5255	50.1847	46.6087	108
chr1	18096916	18097105	Project004-IPSHOCH-Exp5-ChIP-NPC-CTCF-IP-Blobel-Rep2-S1_S8_peakcall_MACS2_rendition_1E-8_downsampled_try3_peak_83	200	10.1261	20.016	17.0908	91
chr1	18121934	18122061	Project004-IPSHOCH-Exp5-ChIP-NPC-CTCF-IP-Blobel-Rep2-S1_S8_peakcall_MACS2_rendition_1E-8_downsampled_try3_peak_84	199	10.9615	19.9467	17.0228	34
chr1	18279076	18279255	Project004-IPSHOCH-Exp5-ChIP-NPC-CTCF-IP-Blobel-Rep2-S1_S8_peakcall_MACS2_rendition_1E-8_downsampled_try3_peak_85	229	12.1843	22.9595	19.9656	77
chr1	18350139	18350301	Project004-IPSHOCH-Exp5-ChIP-NPC-CTCF-IP-Blobel-Rep2-S1_S8_peakcall_MACS2_rendition_1E-8_downsampled_try3_peak_86	277	13.7984	27.7932	24.7029	83
chr1	18966902	18967063	Project004-IPSHOCH-Exp5-ChIP-NPC-CTCF-IP-Blobel-Rep2-S1_S8_peakcall_MACS2_rendition_1E-8_downsampled_try3_peak_87	197	8.4375	19.7116	16.7929	87
chr1	19169233	19169371	Project004-IPSHOCH-Exp5-ChIP-NPC-CTCF-IP-Blobel-Rep2-S1_S8_peakcall_MACS2_rendition_1E-8_downsampled_try3_peak_88	219	9.0625	21.9387	18.9685	60
chr1	19195699	19195965	Project004-IPSHOCH-Exp5-ChIP-NPC-CTCF-IP-Blobel-Rep2-S1_S8_peakcall_MACS2_rendition_1E-8_downsampled_try3_peak_89	671	26.2881	67.1067	63.1135	152
chr1	19196399	19196565	Project004-IPSHOCH-Exp5-ChIP-NPC-CTCF-IP-Blobel-Rep2-S1_S8_peakcall_MACS2_rendition_1E-8_downsampled_try3_peak_90	266	12.4275	26.6606	23.5974	64
chr1	19963559	19963726	Project004-IPSHOCH-Exp5-ChIP-NPC-CTCF-IP-Blobel-Rep2-S1_S8_peakcall_MACS2_rendition_1E-8_downsampled_try3_peak_91	244	12.7645	24.4431	21.4178	105
chr1	20296356	20296488	Project004-IPSHOCH-Exp5-ChIP-NPC-CTCF-IP-Blobel-Rep2-S1_S8_peakcall_MACS2_rendition_1E-8_downsampled_try3_peak_92	199	10.9615	19.9467	17.0228	76
chr1	20301644	20301850	Project004-IPSHOCH-Exp5-ChIP-NPC-CTCF-IP-Blobel-Rep2-S1_S8_peakcall_MACS2_rendition_1E-8_downsampled_try3_peak_93	348	14.1892	34.8116	31.5773	108
chr1	20440311	20440512	Project004-IPSHOCH-Exp5-ChIP-NPC-CTCF-IP-Blobel-Rep2-S1_S8_peakcall_MACS2_rendition_1E-8_downsampled_try3_peak_94	386	17.662	38.6596	35.3447	84
chr1	20503865	20504113	Project004-IPSHOCH-Exp5-ChIP-NPC-CTCF-IP-Blobel-Rep2-S1_S8_peakcall_MACS2_rendition_1E-8_downsampled_try3_peak_95	376	13.125	37.6986	34.3994	139
chr1	20544588	20544810	Project004-IPSHOCH-Exp5-ChIP-NPC-CTCF-IP-Blobel-Rep2-S1_S8_peakcall_MACS2_rendition_1E-8_downsampled_try3_peak_96	609	25.529	60.9157	57.0767	87
chr1	20602882	20603170	Project004-IPSHOCH-Exp5-ChIP-NPC-CTCF-IP-Blobel-Rep2-S1_S8_peakcall_MACS2_rendition_1E-8_downsampled_try3_peak_97	289	10.9375	28.9576	25.8462	110
chr1	20690181	20690377	Project004-IPSHOCH-Exp5-ChIP-NPC-CTCF-IP-Blobel-Rep2-S1_S8_peakcall_MACS2_rendition_1E-8_downsampled_try3_peak_98	370	17.1101	37.0635	33.7803	104
chr1	20728725	20728856	Project004-IPSHOCH-Exp5-ChIP-NPC-CTCF-IP-Blobel-Rep2-S1_S8_peakcall_MACS2_rendition_1E-8_downsampled_try3_peak_99	181	9.6043	18.1455	15.2609	54
chr1	20791901	20792090	Project004-IPSHOCH-Exp5-ChIP-NPC-CTCF-IP-Blobel-Rep2-S1_S8_peakcall_MACS2_rendition_1E-8_downsampled_try3_peak_100	385	17.9864	38.5762	35.2632	94
chr1	20881101	20881270	Project004-IPSHOCH-Exp5-ChIP-NPC-CTCF-IP-Blobel-Rep2-S1_S8_peakcall_MACS2_rendition_1E-8_downsampled_try3_peak_101	370	17.1101	37.0635	33.7803	99
chr1	20923616	20923790	Project004-IPSHOCH-Exp5-ChIP-NPC-CTCF-IP-Blobel-Rep2-S1_S8_peakcall_MACS2_rendition_1E-8_downsampled_try3_peak_102	319	15.5769	31.9808	28.8083	78
chr1	20929197	20929407	Project004-IPSHOCH-Exp5-ChIP-NPC-CTCF-IP-Blobel-Rep2-S1_S8_peakcall_MACS2_rendition_1E-8_downsampled_try3_peak_103	606	25.3846	60.6627	56.8336	122
chr1	21091390	21091626	Project004-IPSHOCH-Exp5-ChIP-NPC-CTCF-IP-Blobel-Rep2-S1_S8_peakcall_MACS2_rendition_1E-8_downsampled_try3_peak_104	384	15.9095	38.4558	35.1472	117
chr1	21152009	21152228	Project004-IPSHOCH-Exp5-ChIP-NPC-CTCF-IP-Blobel-Rep2-S1_S8_peakcall_MACS2_rendition_1E-8_downsampled_try3_peak_105	486	21.4676	48.6447	45.1017	105
chr1	21156315	21156554	Project004-IPSHOCH-Exp5-ChIP-NPC-CTCF-IP-Blobel-Rep2-S1_S8_peakcall_MACS2_rendition_1E-8_downsampled_try3_peak_106	510	16.25	51.0377	47.4406	117
chr1	21203667	21203911	Project004-IPSHOCH-Exp5-ChIP-NPC-CTCF-IP-Blobel-Rep2-S1_S8_peakcall_MACS2_rendition_1E-8_downsampled_try3_peak_107	305	15.0853	30.5622	27.4146	133
chr1	21208537	21208784	Project004-IPSHOCH-Exp5-ChIP-NPC-CTCF-IP-Blobel-Rep2-S1_S8_peakcall_MACS2_rendition_1E-8_downsampled_try3_peak_108	552	17.1875	55.2085	51.5189	105
chr1	21261646	21261769	Project004-IPSHOCH-Exp5-ChIP-NPC-CTCF-IP-Blobel-Rep2-S1_S8_peakcall_MACS2_rendition_1E-8_downsampled_try3_peak_109	171	9.80769	17.1414	14.2785	84
chr1	21266384	21266560	Project004-IPSHOCH-Exp5-ChIP-NPC-CTCF-IP-Blobel-Rep2-S1_S8_peakcall_MACS2_rendition_1E-8_downsampled_try3_peak_110	383	17.8846	38.3991	35.0913	61
chr1	21334460	21334679	Project004-IPSHOCH-Exp5-ChIP-NPC-CTCF-IP-Blobel-Rep2-S1_S8_peakcall_MACS2_rendition_1E-8_downsampled_try3_peak_111	367	17.3077	36.7727	33.4966	132
chr1	21401339	21401640	Project004-IPSHOCH-Exp5-ChIP-NPC-CTCF-IP-Blobel-Rep2-S1_S8_peakcall_MACS2_rendition_1E-8_downsampled_try3_peak_112	583	20.6757	58.3323	54.5591	131
chr1	21451221	21451469	Project004-IPSHOCH-Exp5-ChIP-NPC-CTCF-IP-Blobel-Rep2-S1_S8_peakcall_MACS2_rendition_1E-8_downsampled_try3_peak_113	601	24.1851	60.1844	56.367	138
chr1	21950835	21950959	Project004-IPSHOCH-Exp5-ChIP-NPC-CTCF-IP-Blobel-Rep2-S1_S8_peakcall_MACS2_rendition_1E-8_downsampled_try3_peak_114	194	10.6458	19.4088	16.4967	66
chr1	21951383	21951736	Project004-IPSHOCH-Exp5-ChIP-NPC-CTCF-IP-Blobel-Rep2-S1_S8_peakcall_MACS2_rendition_1E-8_downsampled_try3_peak_115	307	12.973	30.7148	27.5609	116
chr1	21957300	21957515	Project004-IPSHOCH-Exp5-ChIP-NPC-CTCF-IP-Blobel-Rep2-S1_S8_peakcall_MACS2_rendition_1E-8_downsampled_try3_peak_116	418	16.2162	41.8796	38.4905	117
chr1	22095723	22095863	Project004-IPSHOCH-Exp5-ChIP-NPC-CTCF-IP-Blobel-Rep2-S1_S8_peakcall_MACS2_rendition_1E-8_downsampled_try3_peak_117	200	11.0239	20.0537	17.1237	56
chr1	22259091	22259436	Project004-IPSHOCH-Exp5-ChIP-NPC-CTCF-IP-Blobel-Rep2-S1_S8_peakcall_MACS2_rendition_1E-8_downsampled_try3_peak_118	594	18.125	59.4496	55.6513	163
chr1	22376560	22376774	Project004-IPSHOCH-Exp5-ChIP-NPC-CTCF-IP-Blobel-Rep2-S1_S8_peakcall_MACS2_rendition_1E-8_downsampled_try3_peak_119	416	19.0385	41.6928	38.3138	92
chr1	22494260	22494461	Project004-IPSHOCH-Exp5-ChIP-NPC-CTCF-IP-Blobel-Rep2-S1_S8_peakcall_MACS2_rendition_1E-8_downsampled_try3_peak_120	447	17.027	44.7837	41.3346	88
chr1	22611253	22611451	Project004-IPSHOCH-Exp5-ChIP-NPC-CTCF-IP-Blobel-Rep2-S1_S8_peakcall_MACS2_rendition_1E-8_downsampled_try3_peak_121	254	13.0854	25.4995	22.4567	86
chr1	22633881	22634019	Project004-IPSHOCH-Exp5-ChIP-NPC-CTCF-IP-Blobel-Rep2-S1_S8_peakcall_MACS2_rendition_1E-8_downsampled_try3_peak_122	145	8.70307	14.5188	11.7163	95
chr1	23068886	23069139	Project004-IPSHOCH-Exp5-ChIP-NPC-CTCF-IP-Blobel-Rep2-S1_S8_peakcall_MACS2_rendition_1E-8_downsampled_try3_peak_123	602	25.1621	60.2739	56.4558	136
chr1	23175473	23175630	Project004-IPSHOCH-Exp5-ChIP-NPC-CTCF-IP-Blobel-Rep2-S1_S8_peakcall_MACS2_rendition_1E-8_downsampled_try3_peak_124	177	9.93487	17.7699	14.8931	84
chr1	23293659	23293945	Project004-IPSHOCH-Exp5-ChIP-NPC-CTCF-IP-Blobel-Rep2-S1_S8_peakcall_MACS2_rendition_1E-8_downsampled_try3_peak_125	149	5.55556	14.9649	12.1547	97
chr1	23331207	23331341	Project004-IPSHOCH-Exp5-ChIP-NPC-CTCF-IP-Blobel-Rep2-S1_S8_peakcall_MACS2_rendition_1E-8_downsampled_try3_peak_126	228	10.5405	22.8938	19.9053	66
chr1	23712425	23712709	Project004-IPSHOCH-Exp5-ChIP-NPC-CTCF-IP-Blobel-Rep2-S1_S8_peakcall_MACS2_rendition_1E-8_downsampled_try3_peak_127	827	32.3077	82.7078	78.2943	126
chr1	23769663	23769966	Project004-IPSHOCH-Exp5-ChIP-NPC-CTCF-IP-Blobel-Rep2-S1_S8_peakcall_MACS2_rendition_1E-8_downsampled_try3_peak_128	580	17.8125	58.0283	54.2689	126
chr1	23799611	23799955	Project004-IPSHOCH-Exp5-ChIP-NPC-CTCF-IP-Blobel-Rep2-S1_S8_peakcall_MACS2_rendition_1E-8_downsampled_try3_peak_129	637	19.0625	63.7575	59.8504	177
chr1	23833970	23834225	Project004-IPSHOCH-Exp5-ChIP-NPC-CTCF-IP-Blobel-Rep2-S1_S8_peakcall_MACS2_rendition_1E-8_downsampled_try3_peak_130	699	28.43	69.9786	65.9033	129
chr1	23913039	23913263	Project004-IPSHOCH-Exp5-ChIP-NPC-CTCF-IP-Blobel-Rep2-S1_S8_peakcall_MACS2_rendition_1E-8_downsampled_try3_peak_131	210	11.041	21.0226	18.0755	77
chr1	23927189	23927314	Project004-IPSHOCH-Exp5-ChIP-NPC-CTCF-IP-Blobel-Rep2-S1_S8_peakcall_MACS2_rendition_1E-8_downsampled_try3_peak_132	156	8.64387	15.632	12.8126	84
chr1	24041017	24041174	Project004-IPSHOCH-Exp5-ChIP-NPC-CTCF-IP-Blobel-Rep2-S1_S8_peakcall_MACS2_rendition_1E-8_downsampled_try3_peak_133	162	9.03524	16.2752	13.4335	115
chr1	24141809	24142002	Project004-IPSHOCH-Exp5-ChIP-NPC-CTCF-IP-Blobel-Rep2-S1_S8_peakcall_MACS2_rendition_1E-8_downsampled_try3_peak_134	320	13.3784	32.0676	28.8888	96
chr1	24144077	24144262	Project004-IPSHOCH-Exp5-ChIP-NPC-CTCF-IP-Blobel-Rep2-S1_S8_peakcall_MACS2_rendition_1E-8_downsampled_try3_peak_135	584	18.0106	58.4126	54.6383	81
chr1	24178392	24178619	Project004-IPSHOCH-Exp5-ChIP-NPC-CTCF-IP-Blobel-Rep2-S1_S8_peakcall_MACS2_rendition_1E-8_downsampled_try3_peak_136	270	9.40678	27.0855	24.0124	79
chr1	24255972	24256294	Project004-IPSHOCH-Exp5-ChIP-NPC-CTCF-IP-Blobel-Rep2-S1_S8_peakcall_MACS2_rendition_1E-8_downsampled_try3_peak_137	861	31.1214	86.1327	81.6325	173
chr1	24307674	24307838	Project004-IPSHOCH-Exp5-ChIP-NPC-CTCF-IP-Blobel-Rep2-S1_S8_peakcall_MACS2_rendition_1E-8_downsampled_try3_peak_138	169	9.46372	16.9833	14.126	65
chr1	24309568	24309839	Project004-IPSHOCH-Exp5-ChIP-NPC-CTCF-IP-Blobel-Rep2-S1_S8_peakcall_MACS2_rendition_1E-8_downsampled_try3_peak_139	705	28.3013	70.5782	66.4969	130
chr1	24374405	24374687	Project004-IPSHOCH-Exp5-ChIP-NPC-CTCF-IP-Blobel-Rep2-S1_S8_peakcall_MACS2_rendition_1E-8_downsampled_try3_peak_140	587	24.2852	58.7535	54.9728	171
chr1	24385395	24385623	Project004-IPSHOCH-Exp5-ChIP-NPC-CTCF-IP-Blobel-Rep2-S1_S8_peakcall_MACS2_rendition_1E-8_downsampled_try3_peak_141	792	31.3311	79.2612	74.9332	106
chr1	24640653	24640903	Project004-IPSHOCH-Exp5-ChIP-NPC-CTCF-IP-Blobel-Rep2-S1_S8_peakcall_MACS2_rendition_1E-8_downsampled_try3_peak_142	402	13.75	40.2917	36.9391	133
chr1	24685331	24685520	Project004-IPSHOCH-Exp5-ChIP-NPC-CTCF-IP-Blobel-Rep2-S1_S8_peakcall_MACS2_rendition_1E-8_downsampled_try3_peak_143	376	13.125	37.6986	34.3994	89
chr1	24776572	24776794	Project004-IPSHOCH-Exp5-ChIP-NPC-CTCF-IP-Blobel-Rep2-S1_S8_peakcall_MACS2_rendition_1E-8_downsampled_try3_peak_144	359	16.0626	35.9467	32.6906	110
chr1	24958197	24958421	Project004-IPSHOCH-Exp5-ChIP-NPC-CTCF-IP-Blobel-Rep2-S1_S8_peakcall_MACS2_rendition_1E-8_downsampled_try3_peak_145	789	31.1538	78.9497	74.6396	104
chr1	25528592	25528715	Project004-IPSHOCH-Exp5-ChIP-NPC-CTCF-IP-Blobel-Rep2-S1_S8_peakcall_MACS2_rendition_1E-8_downsampled_try3_peak_146	145	8.70307	14.5188	11.7163	65
chr1	25567224	25567477	Project004-IPSHOCH-Exp5-ChIP-NPC-CTCF-IP-Blobel-Rep2-S1_S8_peakcall_MACS2_rendition_1E-8_downsampled_try3_peak_147	522	19.0541	52.2186	48.5899	131
chr1	25583891	25584090	Project004-IPSHOCH-Exp5-ChIP-NPC-CTCF-IP-Blobel-Rep2-S1_S8_peakcall_MACS2_rendition_1E-8_downsampled_try3_peak_148	102	6.08108	10.217	7.54059	100
chr1	25883646	25883925	Project004-IPSHOCH-Exp5-ChIP-NPC-CTCF-IP-Blobel-Rep2-S1_S8_peakcall_MACS2_rendition_1E-8_downsampled_try3_peak_149	403	16.1496	40.3015	36.9484	160
chr1	25885872	25886052	Project004-IPSHOCH-Exp5-ChIP-NPC-CTCF-IP-Blobel-Rep2-S1_S8_peakcall_MACS2_rendition_1E-8_downsampled_try3_peak_150	285	13.5529	28.5441	25.4408	100
chr1	25942017	25942221	Project004-IPSHOCH-Exp5-ChIP-NPC-CTCF-IP-Blobel-Rep2-S1_S8_peakcall_MACS2_rendition_1E-8_downsampled_try3_peak_151	199	10.9615	19.9467	17.0228	120
chr1	26104776	26104899	Project004-IPSHOCH-Exp5-ChIP-NPC-CTCF-IP-Blobel-Rep2-S1_S8_peakcall_MACS2_rendition_1E-8_downsampled_try3_peak_152	156	8.10811	15.6651	12.8402	56
chr1	26885247	26885370	Project004-IPSHOCH-Exp5-ChIP-NPC-CTCF-IP-Blobel-Rep2-S1_S8_peakcall_MACS2_rendition_1E-8_downsampled_try3_peak_153	156	8.10811	15.6651	12.8402	44
chr1	30201937	30202129	Project004-IPSHOCH-Exp5-ChIP-NPC-CTCF-IP-Blobel-Rep2-S1_S8_peakcall_MACS2_rendition_1E-8_downsampled_try3_peak_154	305	15.0853	30.5622	27.4146	117
chr1	30641779	30642026	Project004-IPSHOCH-Exp5-ChIP-NPC-CTCF-IP-Blobel-Rep2-S1_S8_peakcall_MACS2_rendition_1E-8_downsampled_try3_peak_155	447	17.027	44.7837	41.3346	119
chr1	30757351	30757478	Project004-IPSHOCH-Exp5-ChIP-NPC-CTCF-IP-Blobel-Rep2-S1_S8_peakcall_MACS2_rendition_1E-8_downsampled_try3_peak_156	186	10.4437	18.6335	15.7332	77
chr1	30835453	30835916	Project004-IPSHOCH-Exp5-ChIP-NPC-CTCF-IP-Blobel-Rep2-S1_S8_peakcall_MACS2_rendition_1E-8_downsampled_try3_peak_157	566	17.5	56.6146	52.8939	236
chr1	30837233	30837391	Project004-IPSHOCH-Exp5-ChIP-NPC-CTCF-IP-Blobel-Rep2-S1_S8_peakcall_MACS2_rendition_1E-8_downsampled_try3_peak_158	185	10.3846	18.5323	15.6407	71
chr1	30977653	30977935	Project004-IPSHOCH-Exp5-ChIP-NPC-CTCF-IP-Blobel-Rep2-S1_S8_peakcall_MACS2_rendition_1E-8_downsampled_try3_peak_159	425	17.4906	42.5868	39.185	141
chr1	31210904	31211098	Project004-IPSHOCH-Exp5-ChIP-NPC-CTCF-IP-Blobel-Rep2-S1_S8_peakcall_MACS2_rendition_1E-8_downsampled_try3_peak_160	588	24.8077	58.8844	55.0979	113
chr1	31266974	31267331	Project004-IPSHOCH-Exp5-ChIP-NPC-CTCF-IP-Blobel-Rep2-S1_S8_peakcall_MACS2_rendition_1E-8_downsampled_try3_peak_161	390	15.4054	39.0183	35.6872	174
chr1	33021923	33022106	Project004-IPSHOCH-Exp5-ChIP-NPC-CTCF-IP-Blobel-Rep2-S1_S8_peakcall_MACS2_rendition_1E-8_downsampled_try3_peak_162	273	13.8461	27.331	24.2518	82
chr1	33079822	33079953	Project004-IPSHOCH-Exp5-ChIP-NPC-CTCF-IP-Blobel-Rep2-S1_S8_peakcall_MACS2_rendition_1E-8_downsampled_try3_peak_163	228	10.5405	22.8938	19.9053	67
chr1	33622722	33622845	Project004-IPSHOCH-Exp5-ChIP-NPC-CTCF-IP-Blobel-Rep2-S1_S8_peakcall_MACS2_rendition_1E-8_downsampled_try3_peak_164	144	6.875	14.4294	11.6384	38
chr1	33704167	33704307	Project004-IPSHOCH-Exp5-ChIP-NPC-CTCF-IP-Blobel-Rep2-S1_S8_peakcall_MACS2_rendition_1E-8_downsampled_try3_peak_165	259	13.3447	25.9459	22.8918	84
chr1	33720070	33720319	Project004-IPSHOCH-Exp5-ChIP-NPC-CTCF-IP-Blobel-Rep2-S1_S8_peakcall_MACS2_rendition_1E-8_downsampled_try3_peak_166	469	19.2086	46.9946	43.4876	109
chr1	33727329	33727472	Project004-IPSHOCH-Exp5-ChIP-NPC-CTCF-IP-Blobel-Rep2-S1_S8_peakcall_MACS2_rendition_1E-8_downsampled_try3_peak_167	134	7.2973	13.4146	10.6397	31
chr1	33729398	33729632	Project004-IPSHOCH-Exp5-ChIP-NPC-CTCF-IP-Blobel-Rep2-S1_S8_peakcall_MACS2_rendition_1E-8_downsampled_try3_peak_168	620	25.734	62.053	58.1919	113
chr1	33741409	33741606	Project004-IPSHOCH-Exp5-ChIP-NPC-CTCF-IP-Blobel-Rep2-S1_S8_peakcall_MACS2_rendition_1E-8_downsampled_try3_peak_169	277	10.625	27.7551	24.6665	111
chr1	33796274	33796557	Project004-IPSHOCH-Exp5-ChIP-NPC-CTCF-IP-Blobel-Rep2-S1_S8_peakcall_MACS2_rendition_1E-8_downsampled_try3_peak_170	729	28.7007	72.9612	68.811	116
chr1	33799778	33799974	Project004-IPSHOCH-Exp5-ChIP-NPC-CTCF-IP-Blobel-Rep2-S1_S8_peakcall_MACS2_rendition_1E-8_downsampled_try3_peak_171	385	17.9864	38.5762	35.2632	100
chr1	33949701	33949900	Project004-IPSHOCH-Exp5-ChIP-NPC-CTCF-IP-Blobel-Rep2-S1_S8_peakcall_MACS2_rendition_1E-8_downsampled_try3_peak_172	331	14.0246	33.1758	29.9794	68
chr1	33964408	33964582	Project004-IPSHOCH-Exp5-ChIP-NPC-CTCF-IP-Blobel-Rep2-S1_S8_peakcall_MACS2_rendition_1E-8_downsampled_try3_peak_173	253	10	25.3882	22.3512	67
chr1	34021480	34021754	Project004-IPSHOCH-Exp5-ChIP-NPC-CTCF-IP-Blobel-Rep2-S1_S8_peakcall_MACS2_rendition_1E-8_downsampled_try3_peak_174	395	16.57	39.5764	36.2422	186
chr1	34023264	34023494	Project004-IPSHOCH-Exp5-ChIP-NPC-CTCF-IP-Blobel-Rep2-S1_S8_peakcall_MACS2_rendition_1E-8_downsampled_try3_peak_175	367	17.3077	36.7727	33.4966	118
chr1	34062540	34062777	Project004-IPSHOCH-Exp5-ChIP-NPC-CTCF-IP-Blobel-Rep2-S1_S8_peakcall_MACS2_rendition_1E-8_downsampled_try3_peak_176	582	22.0933	58.2734	54.511	118
chr1	34067913	34068120	Project004-IPSHOCH-Exp5-ChIP-NPC-CTCF-IP-Blobel-Rep2-S1_S8_peakcall_MACS2_rendition_1E-8_downsampled_try3_peak_177	241	10.9459	24.1597	21.1477	97
chr1	34118099	34118226	Project004-IPSHOCH-Exp5-ChIP-NPC-CTCF-IP-Blobel-Rep2-S1_S8_peakcall_MACS2_rendition_1E-8_downsampled_try3_peak_178	183	10.2936	18.3769	15.4902	61
chr1	34154577	34154704	Project004-IPSHOCH-Exp5-ChIP-NPC-CTCF-IP-Blobel-Rep2-S1_S8_peakcall_MACS2_rendition_1E-8_downsampled_try3_peak_179	214	11.6041	21.496	18.5379	63
chr1	34221591	34221850	Project004-IPSHOCH-Exp5-ChIP-NPC-CTCF-IP-Blobel-Rep2-S1_S8_peakcall_MACS2_rendition_1E-8_downsampled_try3_peak_180	456	18.4111	45.6423	42.1688	122
chr1	34246857	34247086	Project004-IPSHOCH-Exp5-ChIP-NPC-CTCF-IP-Blobel-Rep2-S1_S8_peakcall_MACS2_rendition_1E-8_downsampled_try3_peak_181	418	19.1468	41.8815	38.4905	114
chr1	34258408	34258569	Project004-IPSHOCH-Exp5-ChIP-NPC-CTCF-IP-Blobel-Rep2-S1_S8_peakcall_MACS2_rendition_1E-8_downsampled_try3_peak_182	383	17.8846	38.3991	35.0913	99
chr1	34275257	34275453	Project004-IPSHOCH-Exp5-ChIP-NPC-CTCF-IP-Blobel-Rep2-S1_S8_peakcall_MACS2_rendition_1E-8_downsampled_try3_peak_183	326	15.2471	32.624	29.4358	115
chr1	34466851	34467006	Project004-IPSHOCH-Exp5-ChIP-NPC-CTCF-IP-Blobel-Rep2-S1_S8_peakcall_MACS2_rendition_1E-8_downsampled_try3_peak_184	252	11.9672	25.2977	22.2638	76
chr1	34519815	34519959	Project004-IPSHOCH-Exp5-ChIP-NPC-CTCF-IP-Blobel-Rep2-S1_S8_peakcall_MACS2_rendition_1E-8_downsampled_try3_peak_185	244	12.7645	24.4431	21.4178	47
chr1	34568014	34568191	Project004-IPSHOCH-Exp5-ChIP-NPC-CTCF-IP-Blobel-Rep2-S1_S8_peakcall_MACS2_rendition_1E-8_downsampled_try3_peak_186	228	12.1154	22.8408	19.8579	77
chr1	34640949	34641136	Project004-IPSHOCH-Exp5-ChIP-NPC-CTCF-IP-Blobel-Rep2-S1_S8_peakcall_MACS2_rendition_1E-8_downsampled_try3_peak_187	161	6.21429	16.1187	13.2792	92
chr1	34659190	34659518	Project004-IPSHOCH-Exp5-ChIP-NPC-CTCF-IP-Blobel-Rep2-S1_S8_peakcall_MACS2_rendition_1E-8_downsampled_try3_peak_188	939	25.3125	93.9706	89.2778	210
chr1	34699381	34699598	Project004-IPSHOCH-Exp5-ChIP-NPC-CTCF-IP-Blobel-Rep2-S1_S8_peakcall_MACS2_rendition_1E-8_downsampled_try3_peak_189	710	20.625	71.0769	66.9791	108
chr1	34720938	34721147	Project004-IPSHOCH-Exp5-ChIP-NPC-CTCF-IP-Blobel-Rep2-S1_S8_peakcall_MACS2_rendition_1E-8_downsampled_try3_peak_190	349	15.8477	34.9212	31.6868	96
chr1	34757621	34757859	Project004-IPSHOCH-Exp5-ChIP-NPC-CTCF-IP-Blobel-Rep2-S1_S8_peakcall_MACS2_rendition_1E-8_downsampled_try3_peak_191	581	23.9279	58.1384	54.3786	111
chr1	34782922	34783097	Project004-IPSHOCH-Exp5-ChIP-NPC-CTCF-IP-Blobel-Rep2-S1_S8_peakcall_MACS2_rendition_1E-8_downsampled_try3_peak_192	259	13.3447	25.9459	22.8918	74
chr1	34795306	34795538	Project004-IPSHOCH-Exp5-ChIP-NPC-CTCF-IP-Blobel-Rep2-S1_S8_peakcall_MACS2_rendition_1E-8_downsampled_try3_peak_193	400	18.4615	40.0393	36.6973	109
chr1	34924098	34924416	Project004-IPSHOCH-Exp5-ChIP-NPC-CTCF-IP-Blobel-Rep2-S1_S8_peakcall_MACS2_rendition_1E-8_downsampled_try3_peak_194	524	16.5625	52.4199	48.7864	111
chr1	34948532	34948699	Project004-IPSHOCH-Exp5-ChIP-NPC-CTCF-IP-Blobel-Rep2-S1_S8_peakcall_MACS2_rendition_1E-8_downsampled_try3_peak_195	320	13.3784	32.0676	28.8888	54
chr1	34953887	34954049	Project004-IPSHOCH-Exp5-ChIP-NPC-CTCF-IP-Blobel-Rep2-S1_S8_peakcall_MACS2_rendition_1E-8_downsampled_try3_peak_196	351	16.7308	35.1605	31.9158	94
chr1	35442258	35442534	Project004-IPSHOCH-Exp5-ChIP-NPC-CTCF-IP-Blobel-Rep2-S1_S8_peakcall_MACS2_rendition_1E-8_downsampled_try3_peak_197	573	24.3686	57.3574	53.6053	165
chr1	35445109	35445304	Project004-IPSHOCH-Exp5-ChIP-NPC-CTCF-IP-Blobel-Rep2-S1_S8_peakcall_MACS2_rendition_1E-8_downsampled_try3_peak_198	288	14.4231	28.8642	25.7559	122
chr1	35535205	35535408	Project004-IPSHOCH-Exp5-ChIP-NPC-CTCF-IP-Blobel-Rep2-S1_S8_peakcall_MACS2_rendition_1E-8_downsampled_try3_peak_199	307	12.973	30.7148	27.5609	85
chr1	35783577	35783736	Project004-IPSHOCH-Exp5-ChIP-NPC-CTCF-IP-Blobel-Rep2-S1_S8_peakcall_MACS2_rendition_1E-8_downsampled_try3_peak_200	321	15.6655	32.1345	28.9516	73
chr1	35896428	35896625	Project004-IPSHOCH-Exp5-ChIP-NPC-CTCF-IP-Blobel-Rep2-S1_S8_peakcall_MACS2_rendition_1E-8_downsampled_try3_peak_201	383	17.8846	38.3991	35.0913	89
chr1	35936264	35936397	Project004-IPSHOCH-Exp5-ChIP-NPC-CTCF-IP-Blobel-Rep2-S1_S8_peakcall_MACS2_rendition_1E-8_downsampled_try3_peak_202	92	5.67568	9.20436	6.56412	39
chr1	36121792	36122011	Project004-IPSHOCH-Exp5-ChIP-NPC-CTCF-IP-Blobel-Rep2-S1_S8_peakcall_MACS2_rendition_1E-8_downsampled_try3_peak_203	552	19.8649	55.2579	51.5604	121
chr1	36191463	36191764	Project004-IPSHOCH-Exp5-ChIP-NPC-CTCF-IP-Blobel-Rep2-S1_S8_peakcall_MACS2_rendition_1E-8_downsampled_try3_peak_204	538	16.875	53.8102	50.1444	206
chr1	36201999	36202194	Project004-IPSHOCH-Exp5-ChIP-NPC-CTCF-IP-Blobel-Rep2-S1_S8_peakcall_MACS2_rendition_1E-8_downsampled_try3_peak_205	288	14.4231	28.8642	25.7559	74
chr1	36206398	36206521	Project004-IPSHOCH-Exp5-ChIP-NPC-CTCF-IP-Blobel-Rep2-S1_S8_peakcall_MACS2_rendition_1E-8_downsampled_try3_peak_206	131	8.07692	13.123	10.3635	69
chr1	36309632	36310022	Project004-IPSHOCH-Exp5-ChIP-NPC-CTCF-IP-Blobel-Rep2-S1_S8_peakcall_MACS2_rendition_1E-8_downsampled_try3_peak_207	890	28.3784	89.0631	84.4835	242
chr1	36311584	36311749	Project004-IPSHOCH-Exp5-ChIP-NPC-CTCF-IP-Blobel-Rep2-S1_S8_peakcall_MACS2_rendition_1E-8_downsampled_try3_peak_208	334	13.7838	33.4333	30.2288	69
chr1	36334204	36334442	Project004-IPSHOCH-Exp5-ChIP-NPC-CTCF-IP-Blobel-Rep2-S1_S8_peakcall_MACS2_rendition_1E-8_downsampled_try3_peak_209	442	14.6875	44.2539	40.8143	124
chr1	36336105	36336405	Project004-IPSHOCH-Exp5-ChIP-NPC-CTCF-IP-Blobel-Rep2-S1_S8_peakcall_MACS2_rendition_1E-8_downsampled_try3_peak_210	630	21.8919	63.0066	59.1167	160
chr1	36380964	36381166	Project004-IPSHOCH-Exp5-ChIP-NPC-CTCF-IP-Blobel-Rep2-S1_S8_peakcall_MACS2_rendition_1E-8_downsampled_try3_peak_211	369	17.4061	36.944	33.6632	104
chr1	36549341	36549573	Project004-IPSHOCH-Exp5-ChIP-NPC-CTCF-IP-Blobel-Rep2-S1_S8_peakcall_MACS2_rendition_1E-8_downsampled_try3_peak_212	404	15.8108	40.4434	37.0817	145
chr1	36553677	36553912	Project004-IPSHOCH-Exp5-ChIP-NPC-CTCF-IP-Blobel-Rep2-S1_S8_peakcall_MACS2_rendition_1E-8_downsampled_try3_peak_213	216	10.1351	21.6442	18.6794	126
chr1	36558228	36558438	Project004-IPSHOCH-Exp5-ChIP-NPC-CTCF-IP-Blobel-Rep2-S1_S8_peakcall_MACS2_rendition_1E-8_downsampled_try3_peak_214	762	25.3766	76.2364	71.9974	111
chr1	36568236	36568425	Project004-IPSHOCH-Exp5-ChIP-NPC-CTCF-IP-Blobel-Rep2-S1_S8_peakcall_MACS2_rendition_1E-8_downsampled_try3_peak_215	311	14.7213	31.1164	27.9578	91
chr1	36570622	36570845	Project004-IPSHOCH-Exp5-ChIP-NPC-CTCF-IP-Blobel-Rep2-S1_S8_peakcall_MACS2_rendition_1E-8_downsampled_try3_peak_216	273	13.529	27.3361	24.2568	100
chr1	36603993	36604377	Project004-IPSHOCH-Exp5-ChIP-NPC-CTCF-IP-Blobel-Rep2-S1_S8_peakcall_MACS2_rendition_1E-8_downsampled_try3_peak_217	741	18.8136	74.1914	69.9998	223
chr1	36614012	36614253	Project004-IPSHOCH-Exp5-ChIP-NPC-CTCF-IP-Blobel-Rep2-S1_S8_peakcall_MACS2_rendition_1E-8_downsampled_try3_peak_218	617	16.5254	61.792	57.9352	90
chr1	36691865	36692120	Project004-IPSHOCH-Exp5-ChIP-NPC-CTCF-IP-Blobel-Rep2-S1_S8_peakcall_MACS2_rendition_1E-8_downsampled_try3_peak_219	339	10.9322	33.9286	30.7076	152
chr1	36721415	36721549	Project004-IPSHOCH-Exp5-ChIP-NPC-CTCF-IP-Blobel-Rep2-S1_S8_peakcall_MACS2_rendition_1E-8_downsampled_try3_peak_220	177	9.93487	17.7699	14.8931	52
chr1	36740997	36741312	Project004-IPSHOCH-Exp5-ChIP-NPC-CTCF-IP-Blobel-Rep2-S1_S8_peakcall_MACS2_rendition_1E-8_downsampled_try3_peak_221	1238	35.9201	123.895	118.573	131
chr1	36766184	36766313	Project004-IPSHOCH-Exp5-ChIP-NPC-CTCF-IP-Blobel-Rep2-S1_S8_peakcall_MACS2_rendition_1E-8_downsampled_try3_peak_222	156	8.10811	15.6651	12.8402	52
chr1	36794209	36794480	Project004-IPSHOCH-Exp5-ChIP-NPC-CTCF-IP-Blobel-Rep2-S1_S8_peakcall_MACS2_rendition_1E-8_downsampled_try3_peak_223	677	23.1081	67.7527	63.7449	141
chr1	36801509	36801756	Project004-IPSHOCH-Exp5-ChIP-NPC-CTCF-IP-Blobel-Rep2-S1_S8_peakcall_MACS2_rendition_1E-8_downsampled_try3_peak_224	385	17.9864	38.5762	35.2632	144
chr1	36803390	36803596	Project004-IPSHOCH-Exp5-ChIP-NPC-CTCF-IP-Blobel-Rep2-S1_S8_peakcall_MACS2_rendition_1E-8_downsampled_try3_peak_225	216	10.1351	21.6442	18.6794	117
chr1	36841546	36841795	Project004-IPSHOCH-Exp5-ChIP-NPC-CTCF-IP-Blobel-Rep2-S1_S8_peakcall_MACS2_rendition_1E-8_downsampled_try3_peak_226	538	16.875	53.8102	50.1444	137
chr1	36961047	36961173	Project004-IPSHOCH-Exp5-ChIP-NPC-CTCF-IP-Blobel-Rep2-S1_S8_peakcall_MACS2_rendition_1E-8_downsampled_try3_peak_227	171	9.80769	17.1414	14.2785	51
chr1	37251468	37251661	Project004-IPSHOCH-Exp5-ChIP-NPC-CTCF-IP-Blobel-Rep2-S1_S8_peakcall_MACS2_rendition_1E-8_downsampled_try3_peak_228	469	20.8874	46.9358	43.434	112
chr1	37307611	37307847	Project004-IPSHOCH-Exp5-ChIP-NPC-CTCF-IP-Blobel-Rep2-S1_S8_peakcall_MACS2_rendition_1E-8_downsampled_try3_peak_229	326	11.875	32.6367	29.4451	114
chr1	37329367	37329643	Project004-IPSHOCH-Exp5-ChIP-NPC-CTCF-IP-Blobel-Rep2-S1_S8_peakcall_MACS2_rendition_1E-8_downsampled_try3_peak_230	770	30.5769	77.0825	72.8198	131
chr1	37458616	37458815	Project004-IPSHOCH-Exp5-ChIP-NPC-CTCF-IP-Blobel-Rep2-S1_S8_peakcall_MACS2_rendition_1E-8_downsampled_try3_peak_231	438	18.2482	43.8697	40.4361	65
chr1	37476333	37476633	Project004-IPSHOCH-Exp5-ChIP-NPC-CTCF-IP-Blobel-Rep2-S1_S8_peakcall_MACS2_rendition_1E-8_downsampled_try3_peak_232	1053	33.1492	105.393	100.435	137
chr1	37505309	37505508	Project004-IPSHOCH-Exp5-ChIP-NPC-CTCF-IP-Blobel-Rep2-S1_S8_peakcall_MACS2_rendition_1E-8_downsampled_try3_peak_233	377	16.3273	37.7574	34.4571	100
chr1	37528710	37528855	Project004-IPSHOCH-Exp5-ChIP-NPC-CTCF-IP-Blobel-Rep2-S1_S8_peakcall_MACS2_rendition_1E-8_downsampled_try3_peak_234	200	11.0239	20.0537	17.1237	76
chr1	37691583	37691797	Project004-IPSHOCH-Exp5-ChIP-NPC-CTCF-IP-Blobel-Rep2-S1_S8_peakcall_MACS2_rendition_1E-8_downsampled_try3_peak_235	473	13.7288	47.376	43.8651	99
chr1	37696109	37696321	Project004-IPSHOCH-Exp5-ChIP-NPC-CTCF-IP-Blobel-Rep2-S1_S8_peakcall_MACS2_rendition_1E-8_downsampled_try3_peak_236	462	17.4324	46.2512	42.766	107
chr1	37735283	37735517	Project004-IPSHOCH-Exp5-ChIP-NPC-CTCF-IP-Blobel-Rep2-S1_S8_peakcall_MACS2_rendition_1E-8_downsampled_try3_peak_237	675	27.0449	67.5666	63.5678	134
chr1	37747585	37747763	Project004-IPSHOCH-Exp5-ChIP-NPC-CTCF-IP-Blobel-Rep2-S1_S8_peakcall_MACS2_rendition_1E-8_downsampled_try3_peak_238	226	11.0467	22.6215	19.6448	108
chr1	37765206	37765356	Project004-IPSHOCH-Exp5-ChIP-NPC-CTCF-IP-Blobel-Rep2-S1_S8_peakcall_MACS2_rendition_1E-8_downsampled_try3_peak_239	132	8.12287	13.2009	10.4334	110
chr1	37776692	37776885	Project004-IPSHOCH-Exp5-ChIP-NPC-CTCF-IP-Blobel-Rep2-S1_S8_peakcall_MACS2_rendition_1E-8_downsampled_try3_peak_240	567	20.2703	56.7908	53.0543	114
chr1	37859245	37859407	Project004-IPSHOCH-Exp5-ChIP-NPC-CTCF-IP-Blobel-Rep2-S1_S8_peakcall_MACS2_rendition_1E-8_downsampled_try3_peak_241	354	16.5581	35.4812	32.2299	80
chr1	37924016	37924208	Project004-IPSHOCH-Exp5-ChIP-NPC-CTCF-IP-Blobel-Rep2-S1_S8_peakcall_MACS2_rendition_1E-8_downsampled_try3_peak_242	507	18.6486	50.7125	47.1216	82
chr1	37948350	37948508	Project004-IPSHOCH-Exp5-ChIP-NPC-CTCF-IP-Blobel-Rep2-S1_S8_peakcall_MACS2_rendition_1E-8_downsampled_try3_peak_243	199	10.9615	19.9467	17.0228	102
chr1	37960121	37960292	Project004-IPSHOCH-Exp5-ChIP-NPC-CTCF-IP-Blobel-Rep2-S1_S8_peakcall_MACS2_rendition_1E-8_downsampled_try3_peak_244	168	8.51351	16.8225	13.9686	73
chr1	38042720	38042886	Project004-IPSHOCH-Exp5-ChIP-NPC-CTCF-IP-Blobel-Rep2-S1_S8_peakcall_MACS2_rendition_1E-8_downsampled_try3_peak_245	241	10.9459	24.1597	21.1477	95
chr1	38054753	38054932	Project004-IPSHOCH-Exp5-ChIP-NPC-CTCF-IP-Blobel-Rep2-S1_S8_peakcall_MACS2_rendition_1E-8_downsampled_try3_peak_246	404	15.8108	40.4434	37.0817	85
chr1	38186856	38187083	Project004-IPSHOCH-Exp5-ChIP-NPC-CTCF-IP-Blobel-Rep2-S1_S8_peakcall_MACS2_rendition_1E-8_downsampled_try3_peak_247	664	24.3947	66.4657	62.486	119
chr1	38242419	38242644	Project004-IPSHOCH-Exp5-ChIP-NPC-CTCF-IP-Blobel-Rep2-S1_S8_peakcall_MACS2_rendition_1E-8_downsampled_try3_peak_248	412	11.3571	41.2865	37.9172	111
chr1	38259691	38259947	Project004-IPSHOCH-Exp5-ChIP-NPC-CTCF-IP-Blobel-Rep2-S1_S8_peakcall_MACS2_rendition_1E-8_downsampled_try3_peak_249	571	24.2308	57.116	53.3693	141
chr1	38309659	38309835	Project004-IPSHOCH-Exp5-ChIP-NPC-CTCF-IP-Blobel-Rep2-S1_S8_peakcall_MACS2_rendition_1E-8_downsampled_try3_peak_250	274	13.9249	27.4672	24.3835	94
chr1	38447813	38447936	Project004-IPSHOCH-Exp5-ChIP-NPC-CTCF-IP-Blobel-Rep2-S1_S8_peakcall_MACS2_rendition_1E-8_downsampled_try3_peak_251	157	9.23077	15.7752	12.9422	86
chr1	38449871	38450076	Project004-IPSHOCH-Exp5-ChIP-NPC-CTCF-IP-Blobel-Rep2-S1_S8_peakcall_MACS2_rendition_1E-8_downsampled_try3_peak_252	520	22.628	52.0971	48.4764	95
chr1	38824824	38825015	Project004-IPSHOCH-Exp5-ChIP-NPC-CTCF-IP-Blobel-Rep2-S1_S8_peakcall_MACS2_rendition_1E-8_downsampled_try3_peak_253	377	16.3273	37.7574	34.4571	84
chr1	38826817	38827039	Project004-IPSHOCH-Exp5-ChIP-NPC-CTCF-IP-Blobel-Rep2-S1_S8_peakcall_MACS2_rendition_1E-8_downsampled_try3_peak_254	351	16.7308	35.1605	31.9158	107
chr1	38844433	38844575	Project004-IPSHOCH-Exp5-ChIP-NPC-CTCF-IP-Blobel-Rep2-S1_S8_peakcall_MACS2_rendition_1E-8_downsampled_try3_peak_255	191	9.32432	19.1965	16.2856	68
chr1	38845925	38846063	Project004-IPSHOCH-Exp5-ChIP-NPC-CTCF-IP-Blobel-Rep2-S1_S8_peakcall_MACS2_rendition_1E-8_downsampled_try3_peak_256	216	10.1351	21.6442	18.6794	81
chr1	38856291	38856510	Project004-IPSHOCH-Exp5-ChIP-NPC-CTCF-IP-Blobel-Rep2-S1_S8_peakcall_MACS2_rendition_1E-8_downsampled_try3_peak_257	518	22.5	51.8733	48.2623	104
chr1	38891773	38892029	Project004-IPSHOCH-Exp5-ChIP-NPC-CTCF-IP-Blobel-Rep2-S1_S8_peakcall_MACS2_rendition_1E-8_downsampled_try3_peak_258	362	14.5946	36.202	32.9388	159
chr1	38913116	38913448	Project004-IPSHOCH-Exp5-ChIP-NPC-CTCF-IP-Blobel-Rep2-S1_S8_peakcall_MACS2_rendition_1E-8_downsampled_try3_peak_259	736	29.5904	73.6665	69.4953	117
chr1	38919182	38919332	Project004-IPSHOCH-Exp5-ChIP-NPC-CTCF-IP-Blobel-Rep2-S1_S8_peakcall_MACS2_rendition_1E-8_downsampled_try3_peak_260	219	9.0625	21.9387	18.9685	75
chr1	38991651	38991790	Project004-IPSHOCH-Exp5-ChIP-NPC-CTCF-IP-Blobel-Rep2-S1_S8_peakcall_MACS2_rendition_1E-8_downsampled_try3_peak_261	219	11.5907	21.9462	18.9742	82
chr1	38993706	38993992	Project004-IPSHOCH-Exp5-ChIP-NPC-CTCF-IP-Blobel-Rep2-S1_S8_peakcall_MACS2_rendition_1E-8_downsampled_try3_peak_262	390	15.4054	39.0183	35.6872	111
chr1	39058051	39058264	Project004-IPSHOCH-Exp5-ChIP-NPC-CTCF-IP-Blobel-Rep2-S1_S8_peakcall_MACS2_rendition_1E-8_downsampled_try3_peak_263	421	18.0705	42.1121	38.7158	95
chr1	39067633	39067830	Project004-IPSHOCH-Exp5-ChIP-NPC-CTCF-IP-Blobel-Rep2-S1_S8_peakcall_MACS2_rendition_1E-8_downsampled_try3_peak_264	697	24.7481	69.7158	65.6513	81
chr1	39397575	39397819	Project004-IPSHOCH-Exp5-ChIP-NPC-CTCF-IP-Blobel-Rep2-S1_S8_peakcall_MACS2_rendition_1E-8_downsampled_try3_peak_265	538	23.2082	53.8399	50.1672	118
chr1	39449144	39449336	Project004-IPSHOCH-Exp5-ChIP-NPC-CTCF-IP-Blobel-Rep2-S1_S8_peakcall_MACS2_rendition_1E-8_downsampled_try3_peak_266	447	17.027	44.7837	41.3346	96
chr1	39561218	39561445	Project004-IPSHOCH-Exp5-ChIP-NPC-CTCF-IP-Blobel-Rep2-S1_S8_peakcall_MACS2_rendition_1E-8_downsampled_try3_peak_267	452	20.3072	45.2387	41.7737	105
chr1	39579481	39579731	Project004-IPSHOCH-Exp5-ChIP-NPC-CTCF-IP-Blobel-Rep2-S1_S8_peakcall_MACS2_rendition_1E-8_downsampled_try3_peak_268	390	15.4054	39.0183	35.6872	135
chr1	39584377	39584591	Project004-IPSHOCH-Exp5-ChIP-NPC-CTCF-IP-Blobel-Rep2-S1_S8_peakcall_MACS2_rendition_1E-8_downsampled_try3_peak_269	637	19.0625	63.7575	59.8504	95
chr1	39587114	39587428	Project004-IPSHOCH-Exp5-ChIP-NPC-CTCF-IP-Blobel-Rep2-S1_S8_peakcall_MACS2_rendition_1E-8_downsampled_try3_peak_270	331	9.07407	33.1259	29.93	208
chr1	39671827	39672066	Project004-IPSHOCH-Exp5-ChIP-NPC-CTCF-IP-Blobel-Rep2-S1_S8_peakcall_MACS2_rendition_1E-8_downsampled_try3_peak_271	873	30.7338	87.3654	82.8371	113
chr1	39707659	39708059	Project004-IPSHOCH-Exp5-ChIP-NPC-CTCF-IP-Blobel-Rep2-S1_S8_peakcall_MACS2_rendition_1E-8_downsampled_try3_peak_272	999	34.0953	99.9516	95.113	176
chr1	39742744	39743033	Project004-IPSHOCH-Exp5-ChIP-NPC-CTCF-IP-Blobel-Rep2-S1_S8_peakcall_MACS2_rendition_1E-8_downsampled_try3_peak_273	772	28.6116	77.225	72.9592	137
chr1	39818316	39818526	Project004-IPSHOCH-Exp5-ChIP-NPC-CTCF-IP-Blobel-Rep2-S1_S8_peakcall_MACS2_rendition_1E-8_downsampled_try3_peak_274	387	17.3502	38.7969	35.4789	90
chr1	39968448	39968625	Project004-IPSHOCH-Exp5-ChIP-NPC-CTCF-IP-Blobel-Rep2-S1_S8_peakcall_MACS2_rendition_1E-8_downsampled_try3_peak_275	225	6.68478	22.571	19.5949	121
chr1	39993476	39993703	Project004-IPSHOCH-Exp5-ChIP-NPC-CTCF-IP-Blobel-Rep2-S1_S8_peakcall_MACS2_rendition_1E-8_downsampled_try3_peak_276	473	13.7288	47.376	43.8651	114
chr1	40057888	40058042	Project004-IPSHOCH-Exp5-ChIP-NPC-CTCF-IP-Blobel-Rep2-S1_S8_peakcall_MACS2_rendition_1E-8_downsampled_try3_peak_277	239	11.5069	23.9511	20.9451	68
chr1	40152542	40152752	Project004-IPSHOCH-Exp5-ChIP-NPC-CTCF-IP-Blobel-Rep2-S1_S8_peakcall_MACS2_rendition_1E-8_downsampled_try3_peak_278	166	6.86441	16.6443	13.7961	94
chr1	40172207	40172405	Project004-IPSHOCH-Exp5-ChIP-NPC-CTCF-IP-Blobel-Rep2-S1_S8_peakcall_MACS2_rendition_1E-8_downsampled_try3_peak_279	452	19.0744	45.2675	41.801	99
chr1	40173357	40173532	Project004-IPSHOCH-Exp5-ChIP-NPC-CTCF-IP-Blobel-Rep2-S1_S8_peakcall_MACS2_rendition_1E-8_downsampled_try3_peak_280	550	21.1728	55.058	51.377	75
chr1	40350904	40351027	Project004-IPSHOCH-Exp5-ChIP-NPC-CTCF-IP-Blobel-Rep2-S1_S8_peakcall_MACS2_rendition_1E-8_downsampled_try3_peak_281	123	6.89189	12.3237	9.58027	51
chr1	40435692	40435911	Project004-IPSHOCH-Exp5-ChIP-NPC-CTCF-IP-Blobel-Rep2-S1_S8_peakcall_MACS2_rendition_1E-8_downsampled_try3_peak_282	564	15.5085	56.4493	52.7335	99
chr1	40436984	40437203	Project004-IPSHOCH-Exp5-ChIP-NPC-CTCF-IP-Blobel-Rep2-S1_S8_peakcall_MACS2_rendition_1E-8_downsampled_try3_peak_283	452	20.3072	45.2387	41.7737	111
chr1	40601599	40601781	Project004-IPSHOCH-Exp5-ChIP-NPC-CTCF-IP-Blobel-Rep2-S1_S8_peakcall_MACS2_rendition_1E-8_downsampled_try3_peak_284	228	7.71429	22.804	19.8254	99
chr1	40636656	40636911	Project004-IPSHOCH-Exp5-ChIP-NPC-CTCF-IP-Blobel-Rep2-S1_S8_peakcall_MACS2_rendition_1E-8_downsampled_try3_peak_285	248	8.8983	24.8937	21.8632	139
chr1	40676054	40676228	Project004-IPSHOCH-Exp5-ChIP-NPC-CTCF-IP-Blobel-Rep2-S1_S8_peakcall_MACS2_rendition_1E-8_downsampled_try3_peak_286	228	12.1154	22.8408	19.8579	80
chr1	40714944	40715067	Project004-IPSHOCH-Exp5-ChIP-NPC-CTCF-IP-Blobel-Rep2-S1_S8_peakcall_MACS2_rendition_1E-8_downsampled_try3_peak_287	144	8.65385	14.4351	11.6391	82
chr1	40825581	40825757	Project004-IPSHOCH-Exp5-ChIP-NPC-CTCF-IP-Blobel-Rep2-S1_S8_peakcall_MACS2_rendition_1E-8_downsampled_try3_peak_288	185	10.3846	18.5323	15.6407	88
chr1	40854251	40854485	Project004-IPSHOCH-Exp5-ChIP-NPC-CTCF-IP-Blobel-Rep2-S1_S8_peakcall_MACS2_rendition_1E-8_downsampled_try3_peak_289	313	11.5625	31.3987	28.2354	114
chr1	40859715	40860027	Project004-IPSHOCH-Exp5-ChIP-NPC-CTCF-IP-Blobel-Rep2-S1_S8_peakcall_MACS2_rendition_1E-8_downsampled_try3_peak_290	552	17.1875	55.2085	51.5189	86
chr1	40901568	40901779	Project004-IPSHOCH-Exp5-ChIP-NPC-CTCF-IP-Blobel-Rep2-S1_S8_peakcall_MACS2_rendition_1E-8_downsampled_try3_peak_291	355	10.2857	35.5676	32.3147	115
chr1	40935984	40936198	Project004-IPSHOCH-Exp5-ChIP-NPC-CTCF-IP-Blobel-Rep2-S1_S8_peakcall_MACS2_rendition_1E-8_downsampled_try3_peak_292	517	20.6492	51.7617	48.1561	101
chr1	40944507	40944707	Project004-IPSHOCH-Exp5-ChIP-NPC-CTCF-IP-Blobel-Rep2-S1_S8_peakcall_MACS2_rendition_1E-8_downsampled_try3_peak_293	219	9.0625	21.9387	18.9685	100
chr1	41058489	41058701	Project004-IPSHOCH-Exp5-ChIP-NPC-CTCF-IP-Blobel-Rep2-S1_S8_peakcall_MACS2_rendition_1E-8_downsampled_try3_peak_294	630	21.8919	63.0066	59.1167	125
chr1	41209480	41209685	Project004-IPSHOCH-Exp5-ChIP-NPC-CTCF-IP-Blobel-Rep2-S1_S8_peakcall_MACS2_rendition_1E-8_downsampled_try3_peak_295	522	19.0541	52.2186	48.5899	110
chr1	41321169	41321351	Project004-IPSHOCH-Exp5-ChIP-NPC-CTCF-IP-Blobel-Rep2-S1_S8_peakcall_MACS2_rendition_1E-8_downsampled_try3_peak_296	312	15.1282	31.2079	28.0487	89
chr1	41327910	41328135	Project004-IPSHOCH-Exp5-ChIP-NPC-CTCF-IP-Blobel-Rep2-S1_S8_peakcall_MACS2_rendition_1E-8_downsampled_try3_peak_297	241	10.9459	24.1597	21.1477	106
chr1	41331502	41331688	Project004-IPSHOCH-Exp5-ChIP-NPC-CTCF-IP-Blobel-Rep2-S1_S8_peakcall_MACS2_rendition_1E-8_downsampled_try3_peak_298	402	18.2139	40.2689	36.92	104
chr1	41867260	41867450	Project004-IPSHOCH-Exp5-ChIP-NPC-CTCF-IP-Blobel-Rep2-S1_S8_peakcall_MACS2_rendition_1E-8_downsampled_try3_peak_299	517	21.5563	51.7433	48.1389	102
chr1	41954699	41954936	Project004-IPSHOCH-Exp5-ChIP-NPC-CTCF-IP-Blobel-Rep2-S1_S8_peakcall_MACS2_rendition_1E-8_downsampled_try3_peak_300	484	21.3462	48.4326	44.9012	102
chr1	42295350	42295527	Project004-IPSHOCH-Exp5-ChIP-NPC-CTCF-IP-Blobel-Rep2-S1_S8_peakcall_MACS2_rendition_1E-8_downsampled_try3_peak_301	293	12.5676	29.3754	26.2484	94
chr1	42741688	42741955	Project004-IPSHOCH-Exp5-ChIP-NPC-CTCF-IP-Blobel-Rep2-S1_S8_peakcall_MACS2_rendition_1E-8_downsampled_try3_peak_302	522	21.8674	52.2742	48.6454	120
chr1	42748151	42748394	Project004-IPSHOCH-Exp5-ChIP-NPC-CTCF-IP-Blobel-Rep2-S1_S8_peakcall_MACS2_rendition_1E-8_downsampled_try3_peak_303	510	21.155	51.0602	47.4631	66
chr1	42771494	42771700	Project004-IPSHOCH-Exp5-ChIP-NPC-CTCF-IP-Blobel-Rep2-S1_S8_peakcall_MACS2_rendition_1E-8_downsampled_try3_peak_304	455	19.2487	45.5627	42.094	93
chr1	42775513	42775665	Project004-IPSHOCH-Exp5-ChIP-NPC-CTCF-IP-Blobel-Rep2-S1_S8_peakcall_MACS2_rendition_1E-8_downsampled_try3_peak_305	186	10.1826	18.6299	15.7332	67
chr1	42836743	42836949	Project004-IPSHOCH-Exp5-ChIP-NPC-CTCF-IP-Blobel-Rep2-S1_S8_peakcall_MACS2_rendition_1E-8_downsampled_try3_peak_306	468	19.979	46.8023	43.3089	113
chr1	42971988	42972141	Project004-IPSHOCH-Exp5-ChIP-NPC-CTCF-IP-Blobel-Rep2-S1_S8_peakcall_MACS2_rendition_1E-8_downsampled_try3_peak_307	338	12.1875	33.886	30.6682	75
chr1	43122850	43123067	Project004-IPSHOCH-Exp5-ChIP-NPC-CTCF-IP-Blobel-Rep2-S1_S8_peakcall_MACS2_rendition_1E-8_downsampled_try3_peak_308	482	15.625	48.2983	44.7729	114
chr1	43167509	43167709	Project004-IPSHOCH-Exp5-ChIP-NPC-CTCF-IP-Blobel-Rep2-S1_S8_peakcall_MACS2_rendition_1E-8_downsampled_try3_peak_309	327	10.678	32.7618	29.5681	88
chr1	43169845	43169984	Project004-IPSHOCH-Exp5-ChIP-NPC-CTCF-IP-Blobel-Rep2-S1_S8_peakcall_MACS2_rendition_1E-8_downsampled_try3_peak_310	265	10.3125	26.5652	23.5028	79
chr1	43196524	43196706	Project004-IPSHOCH-Exp5-ChIP-NPC-CTCF-IP-Blobel-Rep2-S1_S8_peakcall_MACS2_rendition_1E-8_downsampled_try3_peak_311	239	6.5534	23.989	20.9829	116
chr1	43200230	43200372	Project004-IPSHOCH-Exp5-ChIP-NPC-CTCF-IP-Blobel-Rep2-S1_S8_peakcall_MACS2_rendition_1E-8_downsampled_try3_peak_312	207	10.5647	20.7434	17.8012	63
chr1	43321320	43321537	Project004-IPSHOCH-Exp5-ChIP-NPC-CTCF-IP-Blobel-Rep2-S1_S8_peakcall_MACS2_rendition_1E-8_downsampled_try3_peak_313	538	16.875	53.8102	50.1444	96
chr1	43326652	43326803	Project004-IPSHOCH-Exp5-ChIP-NPC-CTCF-IP-Blobel-Rep2-S1_S8_peakcall_MACS2_rendition_1E-8_downsampled_try3_peak_314	204	9.72973	20.4115	17.4743	96
chr1	43356390	43356579	Project004-IPSHOCH-Exp5-ChIP-NPC-CTCF-IP-Blobel-Rep2-S1_S8_peakcall_MACS2_rendition_1E-8_downsampled_try3_peak_315	645	26.6894	64.5131	60.5886	86
chr1	43692675	43692817	Project004-IPSHOCH-Exp5-ChIP-NPC-CTCF-IP-Blobel-Rep2-S1_S8_peakcall_MACS2_rendition_1E-8_downsampled_try3_peak_316	200	11.0239	20.0537	17.1237	72
chr1	43795121	43795335	Project004-IPSHOCH-Exp5-ChIP-NPC-CTCF-IP-Blobel-Rep2-S1_S8_peakcall_MACS2_rendition_1E-8_downsampled_try3_peak_317	455	15	45.5931	42.1206	105
chr1	43817062	43817231	Project004-IPSHOCH-Exp5-ChIP-NPC-CTCF-IP-Blobel-Rep2-S1_S8_peakcall_MACS2_rendition_1E-8_downsampled_try3_peak_318	289	10.9375	28.9576	25.8462	103
chr1	43819604	43819748	Project004-IPSHOCH-Exp5-ChIP-NPC-CTCF-IP-Blobel-Rep2-S1_S8_peakcall_MACS2_rendition_1E-8_downsampled_try3_peak_319	177	9.93487	17.7699	14.8931	50
chr1	43955864	43956110	Project004-IPSHOCH-Exp5-ChIP-NPC-CTCF-IP-Blobel-Rep2-S1_S8_peakcall_MACS2_rendition_1E-8_downsampled_try3_peak_320	552	19.8649	55.2579	51.5604	134
chr1	43959710	43959911	Project004-IPSHOCH-Exp5-ChIP-NPC-CTCF-IP-Blobel-Rep2-S1_S8_peakcall_MACS2_rendition_1E-8_downsampled_try3_peak_321	534	22.082	53.4115	49.7681	117
chr1	44098736	44099012	Project004-IPSHOCH-Exp5-ChIP-NPC-CTCF-IP-Blobel-Rep2-S1_S8_peakcall_MACS2_rendition_1E-8_downsampled_try3_peak_322	433	16.6216	43.3264	39.9111	109
chr1	44121541	44121779	Project004-IPSHOCH-Exp5-ChIP-NPC-CTCF-IP-Blobel-Rep2-S1_S8_peakcall_MACS2_rendition_1E-8_downsampled_try3_peak_323	486	13.9831	48.6494	45.1049	116
chr1	44176733	44176882	Project004-IPSHOCH-Exp5-ChIP-NPC-CTCF-IP-Blobel-Rep2-S1_S8_peakcall_MACS2_rendition_1E-8_downsampled_try3_peak_324	228	10.5405	22.8938	19.9053	61
chr1	44285960	44286171	Project004-IPSHOCH-Exp5-ChIP-NPC-CTCF-IP-Blobel-Rep2-S1_S8_peakcall_MACS2_rendition_1E-8_downsampled_try3_peak_325	450	20.1923	45.0382	41.5819	101
chr1	44494805	44494928	Project004-IPSHOCH-Exp5-ChIP-NPC-CTCF-IP-Blobel-Rep2-S1_S8_peakcall_MACS2_rendition_1E-8_downsampled_try3_peak_326	132	8.12287	13.2009	10.4334	27
chr1	44608325	44608559	Project004-IPSHOCH-Exp5-ChIP-NPC-CTCF-IP-Blobel-Rep2-S1_S8_peakcall_MACS2_rendition_1E-8_downsampled_try3_peak_327	517	20.6492	51.7617	48.1561	127
chr1	44798216	44798391	Project004-IPSHOCH-Exp5-ChIP-NPC-CTCF-IP-Blobel-Rep2-S1_S8_peakcall_MACS2_rendition_1E-8_downsampled_try3_peak_328	102	5.08475	10.248	7.56918	109
chr1	44802553	44802890	Project004-IPSHOCH-Exp5-ChIP-NPC-CTCF-IP-Blobel-Rep2-S1_S8_peakcall_MACS2_rendition_1E-8_downsampled_try3_peak_329	591	24.9488	59.1316	55.3381	144
chr1	45370925	45371050	Project004-IPSHOCH-Exp5-ChIP-NPC-CTCF-IP-Blobel-Rep2-S1_S8_peakcall_MACS2_rendition_1E-8_downsampled_try3_peak_330	134	5.57143	13.464	10.6862	48
chr1	45488809	45489030	Project004-IPSHOCH-Exp5-ChIP-NPC-CTCF-IP-Blobel-Rep2-S1_S8_peakcall_MACS2_rendition_1E-8_downsampled_try3_peak_331	452	20.3072	45.2387	41.7737	106
chr1	45558357	45558482	Project004-IPSHOCH-Exp5-ChIP-NPC-CTCF-IP-Blobel-Rep2-S1_S8_peakcall_MACS2_rendition_1E-8_downsampled_try3_peak_332	168	8.51351	16.8225	13.9686	45
chr1	45684817	45685015	Project004-IPSHOCH-Exp5-ChIP-NPC-CTCF-IP-Blobel-Rep2-S1_S8_peakcall_MACS2_rendition_1E-8_downsampled_try3_peak_333	484	20.0783	48.468	44.9332	82
chr1	45823004	45823356	Project004-IPSHOCH-Exp5-ChIP-NPC-CTCF-IP-Blobel-Rep2-S1_S8_peakcall_MACS2_rendition_1E-8_downsampled_try3_peak_334	567	20.2703	56.7908	53.0543	199
chr1	45873739	45874142	Project004-IPSHOCH-Exp5-ChIP-NPC-CTCF-IP-Blobel-Rep2-S1_S8_peakcall_MACS2_rendition_1E-8_downsampled_try3_peak_335	1078	39.8077	107.841	102.834	161
chr1	45882080	45882342	Project004-IPSHOCH-Exp5-ChIP-NPC-CTCF-IP-Blobel-Rep2-S1_S8_peakcall_MACS2_rendition_1E-8_downsampled_try3_peak_336	645	26.6894	64.5131	60.5886	77
chr1	46079266	46079421	Project004-IPSHOCH-Exp5-ChIP-NPC-CTCF-IP-Blobel-Rep2-S1_S8_peakcall_MACS2_rendition_1E-8_downsampled_try3_peak_337	244	12.7645	24.4431	21.4178	93
chr1	46473891	46474083	Project004-IPSHOCH-Exp5-ChIP-NPC-CTCF-IP-Blobel-Rep2-S1_S8_peakcall_MACS2_rendition_1E-8_downsampled_try3_peak_338	452	20.3072	45.2387	41.7737	101
chr1	46637303	46637445	Project004-IPSHOCH-Exp5-ChIP-NPC-CTCF-IP-Blobel-Rep2-S1_S8_peakcall_MACS2_rendition_1E-8_downsampled_try3_peak_339	210	11.041	21.0226	18.0755	97
chr1	46906664	46906890	Project004-IPSHOCH-Exp5-ChIP-NPC-CTCF-IP-Blobel-Rep2-S1_S8_peakcall_MACS2_rendition_1E-8_downsampled_try3_peak_340	487	20.7011	48.7729	45.2269	116
chr1	46971220	46971528	Project004-IPSHOCH-Exp5-ChIP-NPC-CTCF-IP-Blobel-Rep2-S1_S8_peakcall_MACS2_rendition_1E-8_downsampled_try3_peak_341	132	8.12287	13.2009	10.4334	23
chr1	46996289	46996430	Project004-IPSHOCH-Exp5-ChIP-NPC-CTCF-IP-Blobel-Rep2-S1_S8_peakcall_MACS2_rendition_1E-8_downsampled_try3_peak_342	132	8.12287	13.2009	10.4334	73
chr1	47027474	47027669	Project004-IPSHOCH-Exp5-ChIP-NPC-CTCF-IP-Blobel-Rep2-S1_S8_peakcall_MACS2_rendition_1E-8_downsampled_try3_peak_343	300	9.21428	30.0722	26.9395	98
chr1	47334699	47334845	Project004-IPSHOCH-Exp5-ChIP-NPC-CTCF-IP-Blobel-Rep2-S1_S8_peakcall_MACS2_rendition_1E-8_downsampled_try3_peak_344	134	7.2973	13.4146	10.6397	82
chr1	47866463	47866641	Project004-IPSHOCH-Exp5-ChIP-NPC-CTCF-IP-Blobel-Rep2-S1_S8_peakcall_MACS2_rendition_1E-8_downsampled_try3_peak_345	468	19.5764	46.8622	43.3653	94
chr1	50983861	50984170	Project004-IPSHOCH-Exp5-ChIP-NPC-CTCF-IP-Blobel-Rep2-S1_S8_peakcall_MACS2_rendition_1E-8_downsampled_try3_peak_346	275	12.9658	27.5615	24.4764	220
chr1	51019220	51019412	Project004-IPSHOCH-Exp5-ChIP-NPC-CTCF-IP-Blobel-Rep2-S1_S8_peakcall_MACS2_rendition_1E-8_downsampled_try3_peak_347	651	22.1047	65.1093	61.1671	95
chr1	51390906	51391094	Project004-IPSHOCH-Exp5-ChIP-NPC-CTCF-IP-Blobel-Rep2-S1_S8_peakcall_MACS2_rendition_1E-8_downsampled_try3_peak_348	338	12.1875	33.886	30.6682	92
chr1	51515900	51516117	Project004-IPSHOCH-Exp5-ChIP-NPC-CTCF-IP-Blobel-Rep2-S1_S8_peakcall_MACS2_rendition_1E-8_downsampled_try3_peak_349	733	29.4231	73.3726	69.2094	114
chr1	51522295	51522418	Project004-IPSHOCH-Exp5-ChIP-NPC-CTCF-IP-Blobel-Rep2-S1_S8_peakcall_MACS2_rendition_1E-8_downsampled_try3_peak_350	145	8.70307	14.5188	11.7163	52
chr1	51523336	51523530	Project004-IPSHOCH-Exp5-ChIP-NPC-CTCF-IP-Blobel-Rep2-S1_S8_peakcall_MACS2_rendition_1E-8_downsampled_try3_peak_351	208	8.75	20.8176	17.8726	105
chr1	51653925	51654139	Project004-IPSHOCH-Exp5-ChIP-NPC-CTCF-IP-Blobel-Rep2-S1_S8_peakcall_MACS2_rendition_1E-8_downsampled_try3_peak_352	731	26.2358	73.1666	69.0113	102
chr1	51657236	51657541	Project004-IPSHOCH-Exp5-ChIP-NPC-CTCF-IP-Blobel-Rep2-S1_S8_peakcall_MACS2_rendition_1E-8_downsampled_try3_peak_353	364	12.8125	36.4172	33.1474	215
chr1	51672468	51672633	Project004-IPSHOCH-Exp5-ChIP-NPC-CTCF-IP-Blobel-Rep2-S1_S8_peakcall_MACS2_rendition_1E-8_downsampled_try3_peak_354	227	8.38983	22.7506	19.7726	86
chr1	51701360	51701590	Project004-IPSHOCH-Exp5-ChIP-NPC-CTCF-IP-Blobel-Rep2-S1_S8_peakcall_MACS2_rendition_1E-8_downsampled_try3_peak_355	474	18.5611	47.4271	43.9155	108
chr1	51725817	51725989	Project004-IPSHOCH-Exp5-ChIP-NPC-CTCF-IP-Blobel-Rep2-S1_S8_peakcall_MACS2_rendition_1E-8_downsampled_try3_peak_356	308	13.8083	30.8417	27.6853	91
chr1	51972837	51972982	Project004-IPSHOCH-Exp5-ChIP-NPC-CTCF-IP-Blobel-Rep2-S1_S8_peakcall_MACS2_rendition_1E-8_downsampled_try3_peak_357	256	11.4604	25.6276	22.5842	75
chr1	52001835	52001990	Project004-IPSHOCH-Exp5-ChIP-NPC-CTCF-IP-Blobel-Rep2-S1_S8_peakcall_MACS2_rendition_1E-8_downsampled_try3_peak_358	175	7.8125	17.5473	14.6752	83
chr1	52055498	52055766	Project004-IPSHOCH-Exp5-ChIP-NPC-CTCF-IP-Blobel-Rep2-S1_S8_peakcall_MACS2_rendition_1E-8_downsampled_try3_peak_359	625	26.0022	62.5221	58.6462	114
chr1	52060996	52061237	Project004-IPSHOCH-Exp5-ChIP-NPC-CTCF-IP-Blobel-Rep2-S1_S8_peakcall_MACS2_rendition_1E-8_downsampled_try3_peak_360	598	21.0811	59.8822	56.0741	121
chr1	52143209	52143370	Project004-IPSHOCH-Exp5-ChIP-NPC-CTCF-IP-Blobel-Rep2-S1_S8_peakcall_MACS2_rendition_1E-8_downsampled_try3_peak_361	293	12.5676	29.3754	26.2484	93
chr1	52155804	52156046	Project004-IPSHOCH-Exp5-ChIP-NPC-CTCF-IP-Blobel-Rep2-S1_S8_peakcall_MACS2_rendition_1E-8_downsampled_try3_peak_362	531	18.6766	53.1614	49.5239	117
chr1	52170668	52170935	Project004-IPSHOCH-Exp5-ChIP-NPC-CTCF-IP-Blobel-Rep2-S1_S8_peakcall_MACS2_rendition_1E-8_downsampled_try3_peak_363	686	16.0714	68.6452	64.6103	136
chr1	52203456	52203726	Project004-IPSHOCH-Exp5-ChIP-NPC-CTCF-IP-Blobel-Rep2-S1_S8_peakcall_MACS2_rendition_1E-8_downsampled_try3_peak_364	518	22.5	51.8733	48.2623	148
chr1	52324524	52324679	Project004-IPSHOCH-Exp5-ChIP-NPC-CTCF-IP-Blobel-Rep2-S1_S8_peakcall_MACS2_rendition_1E-8_downsampled_try3_peak_365	123	6.89189	12.3237	9.58027	36
chr1	52356539	52356716	Project004-IPSHOCH-Exp5-ChIP-NPC-CTCF-IP-Blobel-Rep2-S1_S8_peakcall_MACS2_rendition_1E-8_downsampled_try3_peak_366	390	17.0666	39.0042	35.6799	79
chr1	52359502	52359718	Project004-IPSHOCH-Exp5-ChIP-NPC-CTCF-IP-Blobel-Rep2-S1_S8_peakcall_MACS2_rendition_1E-8_downsampled_try3_peak_367	663	25.3701	66.3952	62.4185	109
chr1	52363896	52364057	Project004-IPSHOCH-Exp5-ChIP-NPC-CTCF-IP-Blobel-Rep2-S1_S8_peakcall_MACS2_rendition_1E-8_downsampled_try3_peak_368	218	10.6063	21.8866	18.9191	77
chr1	52687389	52687577	Project004-IPSHOCH-Exp5-ChIP-NPC-CTCF-IP-Blobel-Rep2-S1_S8_peakcall_MACS2_rendition_1E-8_downsampled_try3_peak_369	574	17.5115	57.4405	53.6878	75
chr1	52705077	52705257	Project004-IPSHOCH-Exp5-ChIP-NPC-CTCF-IP-Blobel-Rep2-S1_S8_peakcall_MACS2_rendition_1E-8_downsampled_try3_peak_370	250	11.4747	25.0581	22.0265	90
chr1	52805198	52805479	Project004-IPSHOCH-Exp5-ChIP-NPC-CTCF-IP-Blobel-Rep2-S1_S8_peakcall_MACS2_rendition_1E-8_downsampled_try3_peak_371	573	24.3686	57.3574	53.6053	109
chr1	52873864	52874013	Project004-IPSHOCH-Exp5-ChIP-NPC-CTCF-IP-Blobel-Rep2-S1_S8_peakcall_MACS2_rendition_1E-8_downsampled_try3_peak_372	151	8.0748	15.1477	12.3331	83
chr1	52911013	52911151	Project004-IPSHOCH-Exp5-ChIP-NPC-CTCF-IP-Blobel-Rep2-S1_S8_peakcall_MACS2_rendition_1E-8_downsampled_try3_peak_373	254	11.3514	25.4413	22.3988	69
chr1	53012080	53012302	Project004-IPSHOCH-Exp5-ChIP-NPC-CTCF-IP-Blobel-Rep2-S1_S8_peakcall_MACS2_rendition_1E-8_downsampled_try3_peak_374	254	11.3514	25.4413	22.3988	100
chr1	53089507	53089701	Project004-IPSHOCH-Exp5-ChIP-NPC-CTCF-IP-Blobel-Rep2-S1_S8_peakcall_MACS2_rendition_1E-8_downsampled_try3_peak_375	319	15.5769	31.9808	28.8083	100
chr1	53110015	53110224	Project004-IPSHOCH-Exp5-ChIP-NPC-CTCF-IP-Blobel-Rep2-S1_S8_peakcall_MACS2_rendition_1E-8_downsampled_try3_peak_376	433	16.6216	43.3264	39.9111	102
chr1	53329612	53329790	Project004-IPSHOCH-Exp5-ChIP-NPC-CTCF-IP-Blobel-Rep2-S1_S8_peakcall_MACS2_rendition_1E-8_downsampled_try3_peak_377	166	6.86441	16.6443	13.7961	95
chr1	53409660	53409836	Project004-IPSHOCH-Exp5-ChIP-NPC-CTCF-IP-Blobel-Rep2-S1_S8_peakcall_MACS2_rendition_1E-8_downsampled_try3_peak_378	307	12.973	30.7148	27.5609	73
chr1	53772374	53772599	Project004-IPSHOCH-Exp5-ChIP-NPC-CTCF-IP-Blobel-Rep2-S1_S8_peakcall_MACS2_rendition_1E-8_downsampled_try3_peak_379	583	20.6757	58.3323	54.5591	103
chr1	53947298	53947479	Project004-IPSHOCH-Exp5-ChIP-NPC-CTCF-IP-Blobel-Rep2-S1_S8_peakcall_MACS2_rendition_1E-8_downsampled_try3_peak_380	355	15.0256	35.5573	32.3049	91
chr1	53965990	53966232	Project004-IPSHOCH-Exp5-ChIP-NPC-CTCF-IP-Blobel-Rep2-S1_S8_peakcall_MACS2_rendition_1E-8_downsampled_try3_peak_381	480	18.0092	48.0269	44.5059	137
chr1	53984527	53984747	Project004-IPSHOCH-Exp5-ChIP-NPC-CTCF-IP-Blobel-Rep2-S1_S8_peakcall_MACS2_rendition_1E-8_downsampled_try3_peak_382	435	19.727	43.5538	40.1273	102
chr1	54096038	54096266	Project004-IPSHOCH-Exp5-ChIP-NPC-CTCF-IP-Blobel-Rep2-S1_S8_peakcall_MACS2_rendition_1E-8_downsampled_try3_peak_383	270	9.40678	27.0855	24.0124	76
chr1	54389947	54390147	Project004-IPSHOCH-Exp5-ChIP-NPC-CTCF-IP-Blobel-Rep2-S1_S8_peakcall_MACS2_rendition_1E-8_downsampled_try3_peak_384	320	13.3784	32.0676	28.8888	111
chr1	54438231	54438644	Project004-IPSHOCH-Exp5-ChIP-NPC-CTCF-IP-Blobel-Rep2-S1_S8_peakcall_MACS2_rendition_1E-8_downsampled_try3_peak_385	467	20.8018	46.7863	43.2947	65
chr1	54722895	54723132	Project004-IPSHOCH-Exp5-ChIP-NPC-CTCF-IP-Blobel-Rep2-S1_S8_peakcall_MACS2_rendition_1E-8_downsampled_try3_peak_386	941	35.7692	94.1626	89.4551	120
chr1	54763584	54763721	Project004-IPSHOCH-Exp5-ChIP-NPC-CTCF-IP-Blobel-Rep2-S1_S8_peakcall_MACS2_rendition_1E-8_downsampled_try3_peak_387	292	14.3504	29.2993	26.1796	84
chr1	54889686	54889867	Project004-IPSHOCH-Exp5-ChIP-NPC-CTCF-IP-Blobel-Rep2-S1_S8_peakcall_MACS2_rendition_1E-8_downsampled_try3_peak_388	244	12.7645	24.4431	21.4178	98
chr1	54983217	54983386	Project004-IPSHOCH-Exp5-ChIP-NPC-CTCF-IP-Blobel-Rep2-S1_S8_peakcall_MACS2_rendition_1E-8_downsampled_try3_peak_389	179	6.64286	17.9624	15.0849	69
chr1	55015533	55015656	Project004-IPSHOCH-Exp5-ChIP-NPC-CTCF-IP-Blobel-Rep2-S1_S8_peakcall_MACS2_rendition_1E-8_downsampled_try3_peak_390	145	8.70307	14.5188	11.7163	61
chr1	55036186	55036325	Project004-IPSHOCH-Exp5-ChIP-NPC-CTCF-IP-Blobel-Rep2-S1_S8_peakcall_MACS2_rendition_1E-8_downsampled_try3_peak_391	186	7.37288	18.6225	15.7272	81
chr1	55069479	55069631	Project004-IPSHOCH-Exp5-ChIP-NPC-CTCF-IP-Blobel-Rep2-S1_S8_peakcall_MACS2_rendition_1E-8_downsampled_try3_peak_392	222	11.7664	22.2442	19.2708	76
chr1	55237115	55237283	Project004-IPSHOCH-Exp5-ChIP-NPC-CTCF-IP-Blobel-Rep2-S1_S8_peakcall_MACS2_rendition_1E-8_downsampled_try3_peak_393	200	11.0239	20.0537	17.1237	83
chr1	55242699	55242822	Project004-IPSHOCH-Exp5-ChIP-NPC-CTCF-IP-Blobel-Rep2-S1_S8_peakcall_MACS2_rendition_1E-8_downsampled_try3_peak_394	132	8.12287	13.2009	10.4334	21
chr1	55249749	55249926	Project004-IPSHOCH-Exp5-ChIP-NPC-CTCF-IP-Blobel-Rep2-S1_S8_peakcall_MACS2_rendition_1E-8_downsampled_try3_peak_395	280	12.1622	28.0497	24.9519	75
chr1	55296209	55296397	Project004-IPSHOCH-Exp5-ChIP-NPC-CTCF-IP-Blobel-Rep2-S1_S8_peakcall_MACS2_rendition_1E-8_downsampled_try3_peak_396	589	20.5258	58.9058	55.1186	109
chr1	55358006	55358199	Project004-IPSHOCH-Exp5-ChIP-NPC-CTCF-IP-Blobel-Rep2-S1_S8_peakcall_MACS2_rendition_1E-8_downsampled_try3_peak_397	376	15	37.6044	34.309	113
chr1	55420135	55420376	Project004-IPSHOCH-Exp5-ChIP-NPC-CTCF-IP-Blobel-Rep2-S1_S8_peakcall_MACS2_rendition_1E-8_downsampled_try3_peak_398	447	17.027	44.7837	41.3346	105
chr1	55440056	55440312	Project004-IPSHOCH-Exp5-ChIP-NPC-CTCF-IP-Blobel-Rep2-S1_S8_peakcall_MACS2_rendition_1E-8_downsampled_try3_peak_399	814	27.8416	81.4529	77.0711	111
chr1	55461288	55461494	Project004-IPSHOCH-Exp5-ChIP-NPC-CTCF-IP-Blobel-Rep2-S1_S8_peakcall_MACS2_rendition_1E-8_downsampled_try3_peak_400	374	11.6949	37.4879	34.1992	97
chr1	55486665	55486836	Project004-IPSHOCH-Exp5-ChIP-NPC-CTCF-IP-Blobel-Rep2-S1_S8_peakcall_MACS2_rendition_1E-8_downsampled_try3_peak_401	191	10.4868	19.1402	16.2346	66
chr1	55793321	55793528	Project004-IPSHOCH-Exp5-ChIP-NPC-CTCF-IP-Blobel-Rep2-S1_S8_peakcall_MACS2_rendition_1E-8_downsampled_try3_peak_402	650	25.0979	65.0755	61.134	108
chr1	55812716	55812881	Project004-IPSHOCH-Exp5-ChIP-NPC-CTCF-IP-Blobel-Rep2-S1_S8_peakcall_MACS2_rendition_1E-8_downsampled_try3_peak_403	161	6.21429	16.1187	13.2792	76
chr1	55895080	55895341	Project004-IPSHOCH-Exp5-ChIP-NPC-CTCF-IP-Blobel-Rep2-S1_S8_peakcall_MACS2_rendition_1E-8_downsampled_try3_peak_404	218	7.5	21.8106	18.844	188
chr1	55931101	55931334	Project004-IPSHOCH-Exp5-ChIP-NPC-CTCF-IP-Blobel-Rep2-S1_S8_peakcall_MACS2_rendition_1E-8_downsampled_try3_peak_405	507	18.6486	50.7125	47.1216	110
chr1	55931686	55931849	Project004-IPSHOCH-Exp5-ChIP-NPC-CTCF-IP-Blobel-Rep2-S1_S8_peakcall_MACS2_rendition_1E-8_downsampled_try3_peak_406	224	11.5668	22.4106	19.4356	86
chr1	55943312	55943541	Project004-IPSHOCH-Exp5-ChIP-NPC-CTCF-IP-Blobel-Rep2-S1_S8_peakcall_MACS2_rendition_1E-8_downsampled_try3_peak_407	730	25.632	73.0328	68.8804	110
chr1	55947625	55947838	Project004-IPSHOCH-Exp5-ChIP-NPC-CTCF-IP-Blobel-Rep2-S1_S8_peakcall_MACS2_rendition_1E-8_downsampled_try3_peak_408	196	7.62712	19.6337	16.7192	121
chr1	56017206	56017506	Project004-IPSHOCH-Exp5-ChIP-NPC-CTCF-IP-Blobel-Rep2-S1_S8_peakcall_MACS2_rendition_1E-8_downsampled_try3_peak_409	718	29.0102	71.8183	67.6939	120
chr1	57034051	57034251	Project004-IPSHOCH-Exp5-ChIP-NPC-CTCF-IP-Blobel-Rep2-S1_S8_peakcall_MACS2_rendition_1E-8_downsampled_try3_peak_410	418	18.7659	41.8913	38.4983	92
chr1	57048563	57048765	Project004-IPSHOCH-Exp5-ChIP-NPC-CTCF-IP-Blobel-Rep2-S1_S8_peakcall_MACS2_rendition_1E-8_downsampled_try3_peak_411	311	14.7213	31.1164	27.9578	100
chr1	57262527	57262786	Project004-IPSHOCH-Exp5-ChIP-NPC-CTCF-IP-Blobel-Rep2-S1_S8_peakcall_MACS2_rendition_1E-8_downsampled_try3_peak_412	770	30.5769	77.0825	72.8198	159
chr1	57326615	57326893	Project004-IPSHOCH-Exp5-ChIP-NPC-CTCF-IP-Blobel-Rep2-S1_S8_peakcall_MACS2_rendition_1E-8_downsampled_try3_peak_413	435	19.3178	43.5262	40.104	169
chr1	57396061	57396274	Project004-IPSHOCH-Exp5-ChIP-NPC-CTCF-IP-Blobel-Rep2-S1_S8_peakcall_MACS2_rendition_1E-8_downsampled_try3_peak_414	362	14.5946	36.202	32.9388	116
chr1	57450975	57451194	Project004-IPSHOCH-Exp5-ChIP-NPC-CTCF-IP-Blobel-Rep2-S1_S8_peakcall_MACS2_rendition_1E-8_downsampled_try3_peak_415	584	23.6593	58.4766	54.7001	103
chr1	57480604	57480745	Project004-IPSHOCH-Exp5-ChIP-NPC-CTCF-IP-Blobel-Rep2-S1_S8_peakcall_MACS2_rendition_1E-8_downsampled_try3_peak_416	293	12.5676	29.3754	26.2484	75
chr1	57485812	57486070	Project004-IPSHOCH-Exp5-ChIP-NPC-CTCF-IP-Blobel-Rep2-S1_S8_peakcall_MACS2_rendition_1E-8_downsampled_try3_peak_417	740	21.25	74.0511	69.8726	136
chr1	57830913	57831045	Project004-IPSHOCH-Exp5-ChIP-NPC-CTCF-IP-Blobel-Rep2-S1_S8_peakcall_MACS2_rendition_1E-8_downsampled_try3_peak_418	134	7.2973	13.4146	10.6397	47
chr1	57831862	57832170	Project004-IPSHOCH-Exp5-ChIP-NPC-CTCF-IP-Blobel-Rep2-S1_S8_peakcall_MACS2_rendition_1E-8_downsampled_try3_peak_419	267	11.7568	26.7382	23.6677	250
chr1	58006181	58006345	Project004-IPSHOCH-Exp5-ChIP-NPC-CTCF-IP-Blobel-Rep2-S1_S8_peakcall_MACS2_rendition_1E-8_downsampled_try3_peak_420	219	9.0625	21.9387	18.9685	74
chr1	58026871	58027169	Project004-IPSHOCH-Exp5-ChIP-NPC-CTCF-IP-Blobel-Rep2-S1_S8_peakcall_MACS2_rendition_1E-8_downsampled_try3_peak_421	604	16.2712	60.4462	56.6261	105
chr1	58088103	58088312	Project004-IPSHOCH-Exp5-ChIP-NPC-CTCF-IP-Blobel-Rep2-S1_S8_peakcall_MACS2_rendition_1E-8_downsampled_try3_peak_422	338	15.6247	33.8959	30.6781	111
chr1	58136694	58136837	Project004-IPSHOCH-Exp5-ChIP-NPC-CTCF-IP-Blobel-Rep2-S1_S8_peakcall_MACS2_rendition_1E-8_downsampled_try3_peak_423	199	10.9615	19.9467	17.0228	52
chr1	58169727	58169920	Project004-IPSHOCH-Exp5-ChIP-NPC-CTCF-IP-Blobel-Rep2-S1_S8_peakcall_MACS2_rendition_1E-8_downsampled_try3_peak_424	462	16.5819	46.2774	42.792	105
chr1	58213596	58213894	Project004-IPSHOCH-Exp5-ChIP-NPC-CTCF-IP-Blobel-Rep2-S1_S8_peakcall_MACS2_rendition_1E-8_downsampled_try3_peak_425	622	25.3891	62.2509	58.3858	179
chr1	58328080	58328277	Project004-IPSHOCH-Exp5-ChIP-NPC-CTCF-IP-Blobel-Rep2-S1_S8_peakcall_MACS2_rendition_1E-8_downsampled_try3_peak_426	606	25.3846	60.6627	56.8336	100
chr1	58353259	58353534	Project004-IPSHOCH-Exp5-ChIP-NPC-CTCF-IP-Blobel-Rep2-S1_S8_peakcall_MACS2_rendition_1E-8_downsampled_try3_peak_427	510	16.25	51.0377	47.4406	90
chr1	58619395	58619579	Project004-IPSHOCH-Exp5-ChIP-NPC-CTCF-IP-Blobel-Rep2-S1_S8_peakcall_MACS2_rendition_1E-8_downsampled_try3_peak_428	238	12.0925	23.8179	20.8126	119
chr1	58734520	58734807	Project004-IPSHOCH-Exp5-ChIP-NPC-CTCF-IP-Blobel-Rep2-S1_S8_peakcall_MACS2_rendition_1E-8_downsampled_try3_peak_429	451	19.8697	45.1733	41.7145	116
chr1	58754571	58754780	Project004-IPSHOCH-Exp5-ChIP-NPC-CTCF-IP-Blobel-Rep2-S1_S8_peakcall_MACS2_rendition_1E-8_downsampled_try3_peak_430	429	14.375	42.9238	39.517	93
chr1	58803845	58804038	Project004-IPSHOCH-Exp5-ChIP-NPC-CTCF-IP-Blobel-Rep2-S1_S8_peakcall_MACS2_rendition_1E-8_downsampled_try3_peak_431	553	23.6538	55.3579	51.6521	72
chr1	58826980	58827149	Project004-IPSHOCH-Exp5-ChIP-NPC-CTCF-IP-Blobel-Rep2-S1_S8_peakcall_MACS2_rendition_1E-8_downsampled_try3_peak_432	418	19.1468	41.8815	38.4905	88
chr1	58954545	58954732	Project004-IPSHOCH-Exp5-ChIP-NPC-CTCF-IP-Blobel-Rep2-S1_S8_peakcall_MACS2_rendition_1E-8_downsampled_try3_peak_433	383	17.8846	38.3991	35.0913	82
chr1	59050750	59050886	Project004-IPSHOCH-Exp5-ChIP-NPC-CTCF-IP-Blobel-Rep2-S1_S8_peakcall_MACS2_rendition_1E-8_downsampled_try3_peak_434	145	7.7027	14.5288	11.7208	37
chr1	59066221	59066358	Project004-IPSHOCH-Exp5-ChIP-NPC-CTCF-IP-Blobel-Rep2-S1_S8_peakcall_MACS2_rendition_1E-8_downsampled_try3_peak_435	102	6.08108	10.217	7.54059	53
chr1	59124903	59125106	Project004-IPSHOCH-Exp5-ChIP-NPC-CTCF-IP-Blobel-Rep2-S1_S8_peakcall_MACS2_rendition_1E-8_downsampled_try3_peak_436	354	16.5581	35.4812	32.2299	109
chr1	59199745	59199978	Project004-IPSHOCH-Exp5-ChIP-NPC-CTCF-IP-Blobel-Rep2-S1_S8_peakcall_MACS2_rendition_1E-8_downsampled_try3_peak_437	436	18.5724	43.684	40.2518	92
chr1	59294875	59295075	Project004-IPSHOCH-Exp5-ChIP-NPC-CTCF-IP-Blobel-Rep2-S1_S8_peakcall_MACS2_rendition_1E-8_downsampled_try3_peak_438	514	17.2759	51.418	47.8182	109
chr1	59304566	59304814	Project004-IPSHOCH-Exp5-ChIP-NPC-CTCF-IP-Blobel-Rep2-S1_S8_peakcall_MACS2_rendition_1E-8_downsampled_try3_peak_439	356	16.2986	35.6829	32.4285	102
chr1	59373645	59373870	Project004-IPSHOCH-Exp5-ChIP-NPC-CTCF-IP-Blobel-Rep2-S1_S8_peakcall_MACS2_rendition_1E-8_downsampled_try3_peak_440	688	26.8139	68.8592	64.821	110
chr1	59540663	59540865	Project004-IPSHOCH-Exp5-ChIP-NPC-CTCF-IP-Blobel-Rep2-S1_S8_peakcall_MACS2_rendition_1E-8_downsampled_try3_peak_441	454	18.7284	45.4266	41.9586	91
chr1	59641563	59641789	Project004-IPSHOCH-Exp5-ChIP-NPC-CTCF-IP-Blobel-Rep2-S1_S8_peakcall_MACS2_rendition_1E-8_downsampled_try3_peak_442	510	16.25	51.0377	47.4406	114
chr1	59660952	59661075	Project004-IPSHOCH-Exp5-ChIP-NPC-CTCF-IP-Blobel-Rep2-S1_S8_peakcall_MACS2_rendition_1E-8_downsampled_try3_peak_443	158	9.28328	15.8647	13.0259	69
chr1	59670771	59670982	Project004-IPSHOCH-Exp5-ChIP-NPC-CTCF-IP-Blobel-Rep2-S1_S8_peakcall_MACS2_rendition_1E-8_downsampled_try3_peak_444	267	11.7568	26.7382	23.6677	100
chr1	59680269	59680488	Project004-IPSHOCH-Exp5-ChIP-NPC-CTCF-IP-Blobel-Rep2-S1_S8_peakcall_MACS2_rendition_1E-8_downsampled_try3_peak_445	435	15.0784	43.5272	40.105	111
chr1	59758705	59758853	Project004-IPSHOCH-Exp5-ChIP-NPC-CTCF-IP-Blobel-Rep2-S1_S8_peakcall_MACS2_rendition_1E-8_downsampled_try3_peak_446	228	10.5405	22.8938	19.9053	65
chr1	59776875	59777097	Project004-IPSHOCH-Exp5-ChIP-NPC-CTCF-IP-Blobel-Rep2-S1_S8_peakcall_MACS2_rendition_1E-8_downsampled_try3_peak_447	518	20.2522	51.8798	48.2655	101
chr1	59930920	59931104	Project004-IPSHOCH-Exp5-ChIP-NPC-CTCF-IP-Blobel-Rep2-S1_S8_peakcall_MACS2_rendition_1E-8_downsampled_try3_peak_448	95	6.30915	9.57853	6.91725	136
chr1	59940682	59940921	Project004-IPSHOCH-Exp5-ChIP-NPC-CTCF-IP-Blobel-Rep2-S1_S8_peakcall_MACS2_rendition_1E-8_downsampled_try3_peak_449	730	24.0783	73.0356	68.8826	111
chr1	60024196	60024419	Project004-IPSHOCH-Exp5-ChIP-NPC-CTCF-IP-Blobel-Rep2-S1_S8_peakcall_MACS2_rendition_1E-8_downsampled_try3_peak_450	200	11.0239	20.0537	17.1237	100
chr1	60052636	60052793	Project004-IPSHOCH-Exp5-ChIP-NPC-CTCF-IP-Blobel-Rep2-S1_S8_peakcall_MACS2_rendition_1E-8_downsampled_try3_peak_451	198	10.9218	19.8786	16.9593	75
chr1	60215436	60215559	Project004-IPSHOCH-Exp5-ChIP-NPC-CTCF-IP-Blobel-Rep2-S1_S8_peakcall_MACS2_rendition_1E-8_downsampled_try3_peak_452	114	5.9375	11.4842	8.76699	58
chr1	60253796	60253974	Project004-IPSHOCH-Exp5-ChIP-NPC-CTCF-IP-Blobel-Rep2-S1_S8_peakcall_MACS2_rendition_1E-8_downsampled_try3_peak_453	156	8.10811	15.6651	12.8402	54
chr1	60917583	60917795	Project004-IPSHOCH-Exp5-ChIP-NPC-CTCF-IP-Blobel-Rep2-S1_S8_peakcall_MACS2_rendition_1E-8_downsampled_try3_peak_454	709	23.9189	70.9547	66.8607	99
chr1	60925342	60925574	Project004-IPSHOCH-Exp5-ChIP-NPC-CTCF-IP-Blobel-Rep2-S1_S8_peakcall_MACS2_rendition_1E-8_downsampled_try3_peak_455	211	6.85185	21.1886	18.2411	132
chr1	61011814	61011998	Project004-IPSHOCH-Exp5-ChIP-NPC-CTCF-IP-Blobel-Rep2-S1_S8_peakcall_MACS2_rendition_1E-8_downsampled_try3_peak_456	627	26.1092	62.7096	58.8287	100
chr1	61018045	61018245	Project004-IPSHOCH-Exp5-ChIP-NPC-CTCF-IP-Blobel-Rep2-S1_S8_peakcall_MACS2_rendition_1E-8_downsampled_try3_peak_457	197	8.4375	19.7116	16.7929	109
chr1	61112036	61112422	Project004-IPSHOCH-Exp5-ChIP-NPC-CTCF-IP-Blobel-Rep2-S1_S8_peakcall_MACS2_rendition_1E-8_downsampled_try3_peak_458	566	22.0899	56.6187	52.8964	163
chr1	61196128	61196271	Project004-IPSHOCH-Exp5-ChIP-NPC-CTCF-IP-Blobel-Rep2-S1_S8_peakcall_MACS2_rendition_1E-8_downsampled_try3_peak_459	175	7.8125	17.5473	14.6752	91
chr1	61237986	61238260	Project004-IPSHOCH-Exp5-ChIP-NPC-CTCF-IP-Blobel-Rep2-S1_S8_peakcall_MACS2_rendition_1E-8_downsampled_try3_peak_460	1131	39.4322	113.141	108.027	139
chr1	61354900	61355130	Project004-IPSHOCH-Exp5-ChIP-NPC-CTCF-IP-Blobel-Rep2-S1_S8_peakcall_MACS2_rendition_1E-8_downsampled_try3_peak_461	389	13.4375	38.9902	35.6672	118
chr1	61434002	61434238	Project004-IPSHOCH-Exp5-ChIP-NPC-CTCF-IP-Blobel-Rep2-S1_S8_peakcall_MACS2_rendition_1E-8_downsampled_try3_peak_462	800	22.5	80.0747	75.7327	97
chr1	61817891	61818152	Project004-IPSHOCH-Exp5-ChIP-NPC-CTCF-IP-Blobel-Rep2-S1_S8_peakcall_MACS2_rendition_1E-8_downsampled_try3_peak_463	492	18.6995	49.2219	45.6664	116
chr1	61971633	61971840	Project004-IPSHOCH-Exp5-ChIP-NPC-CTCF-IP-Blobel-Rep2-S1_S8_peakcall_MACS2_rendition_1E-8_downsampled_try3_peak_464	442	14.6875	44.2539	40.8143	84
chr1	62013819	62013942	Project004-IPSHOCH-Exp5-ChIP-NPC-CTCF-IP-Blobel-Rep2-S1_S8_peakcall_MACS2_rendition_1E-8_downsampled_try3_peak_465	178	9.98458	17.8535	14.9766	62
chr1	62743631	62743835	Project004-IPSHOCH-Exp5-ChIP-NPC-CTCF-IP-Blobel-Rep2-S1_S8_peakcall_MACS2_rendition_1E-8_downsampled_try3_peak_466	607	24.5341	60.7814	56.9517	89
chr1	62747677	62748037	Project004-IPSHOCH-Exp5-ChIP-NPC-CTCF-IP-Blobel-Rep2-S1_S8_peakcall_MACS2_rendition_1E-8_downsampled_try3_peak_467	633	22.1022	63.3749	59.4762	123
chr1	62754279	62754457	Project004-IPSHOCH-Exp5-ChIP-NPC-CTCF-IP-Blobel-Rep2-S1_S8_peakcall_MACS2_rendition_1E-8_downsampled_try3_peak_468	299	13.2579	29.914	26.7835	85
chr1	62764633	62764759	Project004-IPSHOCH-Exp5-ChIP-NPC-CTCF-IP-Blobel-Rep2-S1_S8_peakcall_MACS2_rendition_1E-8_downsampled_try3_peak_469	186	10.4437	18.6335	15.7332	62
chr1	62769196	62769336	Project004-IPSHOCH-Exp5-ChIP-NPC-CTCF-IP-Blobel-Rep2-S1_S8_peakcall_MACS2_rendition_1E-8_downsampled_try3_peak_470	240	12.5165	24.0166	21.0104	82
chr1	62829944	62830067	Project004-IPSHOCH-Exp5-ChIP-NPC-CTCF-IP-Blobel-Rep2-S1_S8_peakcall_MACS2_rendition_1E-8_downsampled_try3_peak_471	156	8.10811	15.6651	12.8402	38
chr1	62832894	62833141	Project004-IPSHOCH-Exp5-ChIP-NPC-CTCF-IP-Blobel-Rep2-S1_S8_peakcall_MACS2_rendition_1E-8_downsampled_try3_peak_472	552	17.1875	55.2085	51.5189	110
chr1	62842148	62842313	Project004-IPSHOCH-Exp5-ChIP-NPC-CTCF-IP-Blobel-Rep2-S1_S8_peakcall_MACS2_rendition_1E-8_downsampled_try3_peak_473	158	9.28328	15.8647	13.0259	65
chr1	62866860	62867015	Project004-IPSHOCH-Exp5-ChIP-NPC-CTCF-IP-Blobel-Rep2-S1_S8_peakcall_MACS2_rendition_1E-8_downsampled_try3_peak_474	206	7.88136	20.6591	17.718	75
chr1	62976191	62976413	Project004-IPSHOCH-Exp5-ChIP-NPC-CTCF-IP-Blobel-Rep2-S1_S8_peakcall_MACS2_rendition_1E-8_downsampled_try3_peak_475	376	15	37.6044	34.309	89
chr1	63010963	63011242	Project004-IPSHOCH-Exp5-ChIP-NPC-CTCF-IP-Blobel-Rep2-S1_S8_peakcall_MACS2_rendition_1E-8_downsampled_try3_peak_476	1131	39.4322	113.141	108.027	116
chr1	63013598	63013758	Project004-IPSHOCH-Exp5-ChIP-NPC-CTCF-IP-Blobel-Rep2-S1_S8_peakcall_MACS2_rendition_1E-8_downsampled_try3_peak_477	326	15.2471	32.624	29.4358	64
chr1	63031153	63031326	Project004-IPSHOCH-Exp5-ChIP-NPC-CTCF-IP-Blobel-Rep2-S1_S8_peakcall_MACS2_rendition_1E-8_downsampled_try3_peak_478	158	9.28328	15.8647	13.0259	61
chr1	63032915	63033122	Project004-IPSHOCH-Exp5-ChIP-NPC-CTCF-IP-Blobel-Rep2-S1_S8_peakcall_MACS2_rendition_1E-8_downsampled_try3_peak_479	808	31.7308	80.8249	76.4573	104
chr1	63135375	63135504	Project004-IPSHOCH-Exp5-ChIP-NPC-CTCF-IP-Blobel-Rep2-S1_S8_peakcall_MACS2_rendition_1E-8_downsampled_try3_peak_480	132	8.12287	13.2009	10.4334	42
chr1	63161170	63161354	Project004-IPSHOCH-Exp5-ChIP-NPC-CTCF-IP-Blobel-Rep2-S1_S8_peakcall_MACS2_rendition_1E-8_downsampled_try3_peak_481	199	10.9615	19.9467	17.0228	89
chr1	63227646	63227979	Project004-IPSHOCH-Exp5-ChIP-NPC-CTCF-IP-Blobel-Rep2-S1_S8_peakcall_MACS2_rendition_1E-8_downsampled_try3_peak_482	631	16.7797	63.1445	59.2529	177
chr1	63229290	63229537	Project004-IPSHOCH-Exp5-ChIP-NPC-CTCF-IP-Blobel-Rep2-S1_S8_peakcall_MACS2_rendition_1E-8_downsampled_try3_peak_483	281	9.66102	28.1988	25.0979	126
chr1	63450290	63450471	Project004-IPSHOCH-Exp5-ChIP-NPC-CTCF-IP-Blobel-Rep2-S1_S8_peakcall_MACS2_rendition_1E-8_downsampled_try3_peak_484	367	17.3077	36.7727	33.4966	72
chr1	63704673	63704888	Project004-IPSHOCH-Exp5-ChIP-NPC-CTCF-IP-Blobel-Rep2-S1_S8_peakcall_MACS2_rendition_1E-8_downsampled_try3_peak_485	386	11.9491	38.6933	35.377	109
chr1	63706225	63706430	Project004-IPSHOCH-Exp5-ChIP-NPC-CTCF-IP-Blobel-Rep2-S1_S8_peakcall_MACS2_rendition_1E-8_downsampled_try3_peak_486	341	14.5837	34.1267	30.9049	109
chr1	63715425	63715677	Project004-IPSHOCH-Exp5-ChIP-NPC-CTCF-IP-Blobel-Rep2-S1_S8_peakcall_MACS2_rendition_1E-8_downsampled_try3_peak_487	452	20.3072	45.2387	41.7737	151
chr1	63809783	63809990	Project004-IPSHOCH-Exp5-ChIP-NPC-CTCF-IP-Blobel-Rep2-S1_S8_peakcall_MACS2_rendition_1E-8_downsampled_try3_peak_488	376	13.125	37.6986	34.3994	89
chr1	64349438	64349565	Project004-IPSHOCH-Exp5-ChIP-NPC-CTCF-IP-Blobel-Rep2-S1_S8_peakcall_MACS2_rendition_1E-8_downsampled_try3_peak_489	168	8.51351	16.8225	13.9686	90
chr1	64492664	64492920	Project004-IPSHOCH-Exp5-ChIP-NPC-CTCF-IP-Blobel-Rep2-S1_S8_peakcall_MACS2_rendition_1E-8_downsampled_try3_peak_490	652	19.375	65.2077	61.2614	137
chr1	64494748	64494983	Project004-IPSHOCH-Exp5-ChIP-NPC-CTCF-IP-Blobel-Rep2-S1_S8_peakcall_MACS2_rendition_1E-8_downsampled_try3_peak_491	241	10.9459	24.1597	21.1477	135
chr1	64664205	64664467	Project004-IPSHOCH-Exp5-ChIP-NPC-CTCF-IP-Blobel-Rep2-S1_S8_peakcall_MACS2_rendition_1E-8_downsampled_try3_peak_492	987	26.25	98.7009	93.8866	129
chr1	64751894	64752125	Project004-IPSHOCH-Exp5-ChIP-NPC-CTCF-IP-Blobel-Rep2-S1_S8_peakcall_MACS2_rendition_1E-8_downsampled_try3_peak_493	404	15.8108	40.4434	37.0817	116
chr1	64756578	64756743	Project004-IPSHOCH-Exp5-ChIP-NPC-CTCF-IP-Blobel-Rep2-S1_S8_peakcall_MACS2_rendition_1E-8_downsampled_try3_peak_494	304	10.1695	30.4589	27.3154	80
chr1	64764183	64764403	Project004-IPSHOCH-Exp5-ChIP-NPC-CTCF-IP-Blobel-Rep2-S1_S8_peakcall_MACS2_rendition_1E-8_downsampled_try3_peak_495	800	30.7554	80.0042	75.6651	105
chr1	64782474	64782665	Project004-IPSHOCH-Exp5-ChIP-NPC-CTCF-IP-Blobel-Rep2-S1_S8_peakcall_MACS2_rendition_1E-8_downsampled_try3_peak_496	94	4.83051	9.41087	6.76044	4
chr1	64784059	64784234	Project004-IPSHOCH-Exp5-ChIP-NPC-CTCF-IP-Blobel-Rep2-S1_S8_peakcall_MACS2_rendition_1E-8_downsampled_try3_peak_497	176	7.11864	17.6258	14.751	74
chr1	64965583	64965792	Project004-IPSHOCH-Exp5-ChIP-NPC-CTCF-IP-Blobel-Rep2-S1_S8_peakcall_MACS2_rendition_1E-8_downsampled_try3_peak_498	313	11.5625	31.3987	28.2354	98
chr1	65032882	65033057	Project004-IPSHOCH-Exp5-ChIP-NPC-CTCF-IP-Blobel-Rep2-S1_S8_peakcall_MACS2_rendition_1E-8_downsampled_try3_peak_499	252	11.9672	25.2977	22.2638	92
chr1	65056795	65057032	Project004-IPSHOCH-Exp5-ChIP-NPC-CTCF-IP-Blobel-Rep2-S1_S8_peakcall_MACS2_rendition_1E-8_downsampled_try3_peak_500	1059	34.0286	105.9	100.929	118
chr1	65093050	65093280	Project004-IPSHOCH-Exp5-ChIP-NPC-CTCF-IP-Blobel-Rep2-S1_S8_peakcall_MACS2_rendition_1E-8_downsampled_try3_peak_501	678	27.6923	67.8714	63.8571	119
chr1	65122269	65122413	Project004-IPSHOCH-Exp5-ChIP-NPC-CTCF-IP-Blobel-Rep2-S1_S8_peakcall_MACS2_rendition_1E-8_downsampled_try3_peak_502	199	10.9615	19.9467	17.0228	71
chr1	65158655	65158919	Project004-IPSHOCH-Exp5-ChIP-NPC-CTCF-IP-Blobel-Rep2-S1_S8_peakcall_MACS2_rendition_1E-8_downsampled_try3_peak_503	925	35.3925	92.5878	87.914	137
chr1	65224862	65225090	Project004-IPSHOCH-Exp5-ChIP-NPC-CTCF-IP-Blobel-Rep2-S1_S8_peakcall_MACS2_rendition_1E-8_downsampled_try3_peak_504	440	16.5785	44.0003	40.5661	109
chr1	65225791	65226010	Project004-IPSHOCH-Exp5-ChIP-NPC-CTCF-IP-Blobel-Rep2-S1_S8_peakcall_MACS2_rendition_1E-8_downsampled_try3_peak_505	461	13.4746	46.1105	42.6332	113
chr1	65226517	65226717	Project004-IPSHOCH-Exp5-ChIP-NPC-CTCF-IP-Blobel-Rep2-S1_S8_peakcall_MACS2_rendition_1E-8_downsampled_try3_peak_506	238	8.64407	23.8159	20.8121	104
chr1	65329446	65329684	Project004-IPSHOCH-Exp5-ChIP-NPC-CTCF-IP-Blobel-Rep2-S1_S8_peakcall_MACS2_rendition_1E-8_downsampled_try3_peak_507	230	9.375	23.0745	20.0771	120
chr1	65358776	65358992	Project004-IPSHOCH-Exp5-ChIP-NPC-CTCF-IP-Blobel-Rep2-S1_S8_peakcall_MACS2_rendition_1E-8_downsampled_try3_peak_508	348	14.1892	34.8116	31.5773	106
chr1	65359577	65359724	Project004-IPSHOCH-Exp5-ChIP-NPC-CTCF-IP-Blobel-Rep2-S1_S8_peakcall_MACS2_rendition_1E-8_downsampled_try3_peak_509	197	10.5654	19.7383	16.8196	66
chr1	65435005	65435137	Project004-IPSHOCH-Exp5-ChIP-NPC-CTCF-IP-Blobel-Rep2-S1_S8_peakcall_MACS2_rendition_1E-8_downsampled_try3_peak_510	175	7.8125	17.5473	14.6752	47
chr1	65701161	65701302	Project004-IPSHOCH-Exp5-ChIP-NPC-CTCF-IP-Blobel-Rep2-S1_S8_peakcall_MACS2_rendition_1E-8_downsampled_try3_peak_511	191	9.32432	19.1965	16.2856	69
chr1	66146509	66146678	Project004-IPSHOCH-Exp5-ChIP-NPC-CTCF-IP-Blobel-Rep2-S1_S8_peakcall_MACS2_rendition_1E-8_downsampled_try3_peak_512	254	11.3514	25.4413	22.3988	90
chr1	66151210	66151408	Project004-IPSHOCH-Exp5-ChIP-NPC-CTCF-IP-Blobel-Rep2-S1_S8_peakcall_MACS2_rendition_1E-8_downsampled_try3_peak_513	503	22.0478	50.3653	46.7833	104
chr1	66702421	66702622	Project004-IPSHOCH-Exp5-ChIP-NPC-CTCF-IP-Blobel-Rep2-S1_S8_peakcall_MACS2_rendition_1E-8_downsampled_try3_peak_514	267	11.7568	26.7382	23.6677	93
chr1	66725331	66725534	Project004-IPSHOCH-Exp5-ChIP-NPC-CTCF-IP-Blobel-Rep2-S1_S8_peakcall_MACS2_rendition_1E-8_downsampled_try3_peak_515	277	13.7984	27.7932	24.7029	107
chr1	66885124	66885397	Project004-IPSHOCH-Exp5-ChIP-NPC-CTCF-IP-Blobel-Rep2-S1_S8_peakcall_MACS2_rendition_1E-8_downsampled_try3_peak_516	485	20.9736	48.5029	44.9659	117
chr1	66942363	66942549	Project004-IPSHOCH-Exp5-ChIP-NPC-CTCF-IP-Blobel-Rep2-S1_S8_peakcall_MACS2_rendition_1E-8_downsampled_try3_peak_517	326	11.875	32.6367	29.4451	118
chr1	66942785	66942936	Project004-IPSHOCH-Exp5-ChIP-NPC-CTCF-IP-Blobel-Rep2-S1_S8_peakcall_MACS2_rendition_1E-8_downsampled_try3_peak_518	210	11.041	21.0226	18.0755	67
chr1	66987665	66987834	Project004-IPSHOCH-Exp5-ChIP-NPC-CTCF-IP-Blobel-Rep2-S1_S8_peakcall_MACS2_rendition_1E-8_downsampled_try3_peak_519	242	9.6875	24.2245	21.2098	71
chr1	67039394	67039591	Project004-IPSHOCH-Exp5-ChIP-NPC-CTCF-IP-Blobel-Rep2-S1_S8_peakcall_MACS2_rendition_1E-8_downsampled_try3_peak_520	442	14.6875	44.2539	40.8143	103
chr1	67060899	67061046	Project004-IPSHOCH-Exp5-ChIP-NPC-CTCF-IP-Blobel-Rep2-S1_S8_peakcall_MACS2_rendition_1E-8_downsampled_try3_peak_521	186	10.4437	18.6335	15.7332	72
chr1	67108120	67108305	Project004-IPSHOCH-Exp5-ChIP-NPC-CTCF-IP-Blobel-Rep2-S1_S8_peakcall_MACS2_rendition_1E-8_downsampled_try3_peak_522	279	8.78571	27.9421	24.8513	75
chr1	67190588	67190793	Project004-IPSHOCH-Exp5-ChIP-NPC-CTCF-IP-Blobel-Rep2-S1_S8_peakcall_MACS2_rendition_1E-8_downsampled_try3_peak_523	280	12.1622	28.0497	24.9519	112
chr1	67227828	67228091	Project004-IPSHOCH-Exp5-ChIP-NPC-CTCF-IP-Blobel-Rep2-S1_S8_peakcall_MACS2_rendition_1E-8_downsampled_try3_peak_524	890	28.3784	89.0631	84.4835	109
chr1	67264972	67265155	Project004-IPSHOCH-Exp5-ChIP-NPC-CTCF-IP-Blobel-Rep2-S1_S8_peakcall_MACS2_rendition_1E-8_downsampled_try3_peak_525	380	16.1097	38.0889	34.7863	83
chr1	67687011	67687244	Project004-IPSHOCH-Exp5-ChIP-NPC-CTCF-IP-Blobel-Rep2-S1_S8_peakcall_MACS2_rendition_1E-8_downsampled_try3_peak_526	385	17.9864	38.5762	35.2632	94
chr1	68153134	68153350	Project004-IPSHOCH-Exp5-ChIP-NPC-CTCF-IP-Blobel-Rep2-S1_S8_peakcall_MACS2_rendition_1E-8_downsampled_try3_peak_527	353	16.8259	35.3259	32.0766	113
chr1	68197254	68197414	Project004-IPSHOCH-Exp5-ChIP-NPC-CTCF-IP-Blobel-Rep2-S1_S8_peakcall_MACS2_rendition_1E-8_downsampled_try3_peak_528	214	11.6041	21.496	18.5379	74
chr1	69185561	69185803	Project004-IPSHOCH-Exp5-ChIP-NPC-CTCF-IP-Blobel-Rep2-S1_S8_peakcall_MACS2_rendition_1E-8_downsampled_try3_peak_529	455	15	45.5931	42.1206	78
chr1	69211869	69212131	Project004-IPSHOCH-Exp5-ChIP-NPC-CTCF-IP-Blobel-Rep2-S1_S8_peakcall_MACS2_rendition_1E-8_downsampled_try3_peak_530	168	8.51351	16.8225	13.9686	68
chr1	69288361	69288582	Project004-IPSHOCH-Exp5-ChIP-NPC-CTCF-IP-Blobel-Rep2-S1_S8_peakcall_MACS2_rendition_1E-8_downsampled_try3_peak_531	1073	37.8549	107.398	102.398	120
chr1	69378078	69378231	Project004-IPSHOCH-Exp5-ChIP-NPC-CTCF-IP-Blobel-Rep2-S1_S8_peakcall_MACS2_rendition_1E-8_downsampled_try3_peak_532	123	6.89189	12.3237	9.58027	57
chr1	69735694	69735906	Project004-IPSHOCH-Exp5-ChIP-NPC-CTCF-IP-Blobel-Rep2-S1_S8_peakcall_MACS2_rendition_1E-8_downsampled_try3_peak_533	695	28.1668	69.5169	65.4647	95
chr1	69831763	69832011	Project004-IPSHOCH-Exp5-ChIP-NPC-CTCF-IP-Blobel-Rep2-S1_S8_peakcall_MACS2_rendition_1E-8_downsampled_try3_peak_534	536	20.3288	53.6158	49.9624	125
chr1	69836899	69837088	Project004-IPSHOCH-Exp5-ChIP-NPC-CTCF-IP-Blobel-Rep2-S1_S8_peakcall_MACS2_rendition_1E-8_downsampled_try3_peak_535	447	17.027	44.7837	41.3346	86
chr1	70174719	70174889	Project004-IPSHOCH-Exp5-ChIP-NPC-CTCF-IP-Blobel-Rep2-S1_S8_peakcall_MACS2_rendition_1E-8_downsampled_try3_peak_536	134	5.57143	13.464	10.6862	85
chr1	70316804	70316991	Project004-IPSHOCH-Exp5-ChIP-NPC-CTCF-IP-Blobel-Rep2-S1_S8_peakcall_MACS2_rendition_1E-8_downsampled_try3_peak_537	402	18.5665	40.2222	36.8751	115
chr1	71083661	71083800	Project004-IPSHOCH-Exp5-ChIP-NPC-CTCF-IP-Blobel-Rep2-S1_S8_peakcall_MACS2_rendition_1E-8_downsampled_try3_peak_538	134	6.5625	13.4274	10.65	73
chr1	71316823	71317002	Project004-IPSHOCH-Exp5-ChIP-NPC-CTCF-IP-Blobel-Rep2-S1_S8_peakcall_MACS2_rendition_1E-8_downsampled_try3_peak_539	201	10.8232	20.1698	17.2395	66
chr1	71336192	71336397	Project004-IPSHOCH-Exp5-ChIP-NPC-CTCF-IP-Blobel-Rep2-S1_S8_peakcall_MACS2_rendition_1E-8_downsampled_try3_peak_540	344	15.5607	34.4377	31.2121	91
chr1	71552521	71552698	Project004-IPSHOCH-Exp5-ChIP-NPC-CTCF-IP-Blobel-Rep2-S1_S8_peakcall_MACS2_rendition_1E-8_downsampled_try3_peak_541	507	18.6486	50.7125	47.1216	91
chr1	71578399	71578559	Project004-IPSHOCH-Exp5-ChIP-NPC-CTCF-IP-Blobel-Rep2-S1_S8_peakcall_MACS2_rendition_1E-8_downsampled_try3_peak_542	206	7.88136	20.6591	17.718	70
chr1	72170276	72170526	Project004-IPSHOCH-Exp5-ChIP-NPC-CTCF-IP-Blobel-Rep2-S1_S8_peakcall_MACS2_rendition_1E-8_downsampled_try3_peak_543	374	11.6949	37.4879	34.1992	167
chr1	72188535	72188753	Project004-IPSHOCH-Exp5-ChIP-NPC-CTCF-IP-Blobel-Rep2-S1_S8_peakcall_MACS2_rendition_1E-8_downsampled_try3_peak_544	955	25.625	95.5421	90.8072	112
chr1	72258853	72258977	Project004-IPSHOCH-Exp5-ChIP-NPC-CTCF-IP-Blobel-Rep2-S1_S8_peakcall_MACS2_rendition_1E-8_downsampled_try3_peak_545	187	9.66584	18.7417	15.8404	60
chr1	72266684	72266850	Project004-IPSHOCH-Exp5-ChIP-NPC-CTCF-IP-Blobel-Rep2-S1_S8_peakcall_MACS2_rendition_1E-8_downsampled_try3_peak_546	241	10.9459	24.1597	21.1477	71
chr1	72279252	72279422	Project004-IPSHOCH-Exp5-ChIP-NPC-CTCF-IP-Blobel-Rep2-S1_S8_peakcall_MACS2_rendition_1E-8_downsampled_try3_peak_547	266	13.1441	26.6869	23.6222	76
chr1	72353277	72353724	Project004-IPSHOCH-Exp5-ChIP-NPC-CTCF-IP-Blobel-Rep2-S1_S8_peakcall_MACS2_rendition_1E-8_downsampled_try3_peak_548	329	15.0587	32.9425	29.747	375
chr1	72360297	72360519	Project004-IPSHOCH-Exp5-ChIP-NPC-CTCF-IP-Blobel-Rep2-S1_S8_peakcall_MACS2_rendition_1E-8_downsampled_try3_peak_549	433	16.6216	43.3264	39.9111	104
chr1	72427222	72427370	Project004-IPSHOCH-Exp5-ChIP-NPC-CTCF-IP-Blobel-Rep2-S1_S8_peakcall_MACS2_rendition_1E-8_downsampled_try3_peak_550	179	8.91892	17.9999	15.1172	83
chr1	72621828	72622012	Project004-IPSHOCH-Exp5-ChIP-NPC-CTCF-IP-Blobel-Rep2-S1_S8_peakcall_MACS2_rendition_1E-8_downsampled_try3_peak_551	144	6.875	14.4294	11.6384	89
chr1	72657144	72657280	Project004-IPSHOCH-Exp5-ChIP-NPC-CTCF-IP-Blobel-Rep2-S1_S8_peakcall_MACS2_rendition_1E-8_downsampled_try3_peak_552	145	8.70307	14.5188	11.7163	55
chr1	72763627	72763837	Project004-IPSHOCH-Exp5-ChIP-NPC-CTCF-IP-Blobel-Rep2-S1_S8_peakcall_MACS2_rendition_1E-8_downsampled_try3_peak_553	429	10.7407	42.9282	39.5213	105
chr1	72765481	72765820	Project004-IPSHOCH-Exp5-ChIP-NPC-CTCF-IP-Blobel-Rep2-S1_S8_peakcall_MACS2_rendition_1E-8_downsampled_try3_peak_554	963	33.1349	96.3238	91.5628	120
chr1	72901561	72901811	Project004-IPSHOCH-Exp5-ChIP-NPC-CTCF-IP-Blobel-Rep2-S1_S8_peakcall_MACS2_rendition_1E-8_downsampled_try3_peak_555	755	19.0678	75.5994	71.3742	128
chr1	72912379	72912701	Project004-IPSHOCH-Exp5-ChIP-NPC-CTCF-IP-Blobel-Rep2-S1_S8_peakcall_MACS2_rendition_1E-8_downsampled_try3_peak_556	952	35.324	95.2458	90.5152	181
chr1	72924490	72924706	Project004-IPSHOCH-Exp5-ChIP-NPC-CTCF-IP-Blobel-Rep2-S1_S8_peakcall_MACS2_rendition_1E-8_downsampled_try3_peak_557	472	20.2673	47.2935	43.7846	100
chr1	73321214	73321343	Project004-IPSHOCH-Exp5-ChIP-NPC-CTCF-IP-Blobel-Rep2-S1_S8_peakcall_MACS2_rendition_1E-8_downsampled_try3_peak_558	207	10.5647	20.7434	17.8012	73
chr1	73665225	73665416	Project004-IPSHOCH-Exp5-ChIP-NPC-CTCF-IP-Blobel-Rep2-S1_S8_peakcall_MACS2_rendition_1E-8_downsampled_try3_peak_559	498	21.3133	49.8201	46.2586	115
chr1	73762309	73762432	Project004-IPSHOCH-Exp5-ChIP-NPC-CTCF-IP-Blobel-Rep2-S1_S8_peakcall_MACS2_rendition_1E-8_downsampled_try3_peak_560	156	8.10811	15.6651	12.8402	68
chr1	73872980	73873214	Project004-IPSHOCH-Exp5-ChIP-NPC-CTCF-IP-Blobel-Rep2-S1_S8_peakcall_MACS2_rendition_1E-8_downsampled_try3_peak_561	436	12.9661	43.6039	40.174	108
chr1	73909460	73909769	Project004-IPSHOCH-Exp5-ChIP-NPC-CTCF-IP-Blobel-Rep2-S1_S8_peakcall_MACS2_rendition_1E-8_downsampled_try3_peak_562	1056	29.3691	105.682	100.719	105
chr1	73948147	73948450	Project004-IPSHOCH-Exp5-ChIP-NPC-CTCF-IP-Blobel-Rep2-S1_S8_peakcall_MACS2_rendition_1E-8_downsampled_try3_peak_563	507	18.6486	50.7125	47.1216	168
chr1	73948970	73949205	Project004-IPSHOCH-Exp5-ChIP-NPC-CTCF-IP-Blobel-Rep2-S1_S8_peakcall_MACS2_rendition_1E-8_downsampled_try3_peak_564	307	12.973	30.7148	27.5609	116
chr1	73972914	73973114	Project004-IPSHOCH-Exp5-ChIP-NPC-CTCF-IP-Blobel-Rep2-S1_S8_peakcall_MACS2_rendition_1E-8_downsampled_try3_peak_565	320	13.3784	32.0676	28.8888	103
chr1	74033345	74033567	Project004-IPSHOCH-Exp5-ChIP-NPC-CTCF-IP-Blobel-Rep2-S1_S8_peakcall_MACS2_rendition_1E-8_downsampled_try3_peak_566	645	26.6894	64.5131	60.5886	126
chr1	74042961	74043155	Project004-IPSHOCH-Exp5-ChIP-NPC-CTCF-IP-Blobel-Rep2-S1_S8_peakcall_MACS2_rendition_1E-8_downsampled_try3_peak_567	410	17.0303	41.0758	37.7095	97
chr1	74124005	74124223	Project004-IPSHOCH-Exp5-ChIP-NPC-CTCF-IP-Blobel-Rep2-S1_S8_peakcall_MACS2_rendition_1E-8_downsampled_try3_peak_568	588	24.8077	58.8844	55.0979	110
chr1	74129543	74129715	Project004-IPSHOCH-Exp5-ChIP-NPC-CTCF-IP-Blobel-Rep2-S1_S8_peakcall_MACS2_rendition_1E-8_downsampled_try3_peak_569	416	14.0625	41.603	38.2286	71
chr1	74144981	74145120	Project004-IPSHOCH-Exp5-ChIP-NPC-CTCF-IP-Blobel-Rep2-S1_S8_peakcall_MACS2_rendition_1E-8_downsampled_try3_peak_570	176	7.11864	17.6258	14.751	84
chr1	74171764	74171978	Project004-IPSHOCH-Exp5-ChIP-NPC-CTCF-IP-Blobel-Rep2-S1_S8_peakcall_MACS2_rendition_1E-8_downsampled_try3_peak_571	436	11.7857	43.6318	40.2013	109
chr1	74178670	74178834	Project004-IPSHOCH-Exp5-ChIP-NPC-CTCF-IP-Blobel-Rep2-S1_S8_peakcall_MACS2_rendition_1E-8_downsampled_try3_peak_572	304	15	30.4143	27.2723	88
chr1	74186143	74186273	Project004-IPSHOCH-Exp5-ChIP-NPC-CTCF-IP-Blobel-Rep2-S1_S8_peakcall_MACS2_rendition_1E-8_downsampled_try3_peak_573	150	8.53328	15.0152	12.2038	83
chr1	74242646	74242850	Project004-IPSHOCH-Exp5-ChIP-NPC-CTCF-IP-Blobel-Rep2-S1_S8_peakcall_MACS2_rendition_1E-8_downsampled_try3_peak_574	204	9.72973	20.4115	17.4743	99
chr1	74252472	74252713	Project004-IPSHOCH-Exp5-ChIP-NPC-CTCF-IP-Blobel-Rep2-S1_S8_peakcall_MACS2_rendition_1E-8_downsampled_try3_peak_575	677	23.1081	67.7527	63.7449	94
chr1	74333772	74334052	Project004-IPSHOCH-Exp5-ChIP-NPC-CTCF-IP-Blobel-Rep2-S1_S8_peakcall_MACS2_rendition_1E-8_downsampled_try3_peak_576	774	25.5405	77.4452	73.1643	158
chr1	74359887	74360185	Project004-IPSHOCH-Exp5-ChIP-NPC-CTCF-IP-Blobel-Rep2-S1_S8_peakcall_MACS2_rendition_1E-8_downsampled_try3_peak_577	737	27.6077	73.7139	69.5398	190
chr1	74408418	74408745	Project004-IPSHOCH-Exp5-ChIP-NPC-CTCF-IP-Blobel-Rep2-S1_S8_peakcall_MACS2_rendition_1E-8_downsampled_try3_peak_578	868	32.0715	86.8233	82.3067	159
chr1	74433234	74433463	Project004-IPSHOCH-Exp5-ChIP-NPC-CTCF-IP-Blobel-Rep2-S1_S8_peakcall_MACS2_rendition_1E-8_downsampled_try3_peak_579	254	11.3514	25.4413	22.3988	80
chr1	74437252	74437410	Project004-IPSHOCH-Exp5-ChIP-NPC-CTCF-IP-Blobel-Rep2-S1_S8_peakcall_MACS2_rendition_1E-8_downsampled_try3_peak_580	128	5.84746	12.8808	10.1276	83
chr1	74444034	74444193	Project004-IPSHOCH-Exp5-ChIP-NPC-CTCF-IP-Blobel-Rep2-S1_S8_peakcall_MACS2_rendition_1E-8_downsampled_try3_peak_581	248	8.14286	24.8259	21.7984	73
chr1	74444853	74444987	Project004-IPSHOCH-Exp5-ChIP-NPC-CTCF-IP-Blobel-Rep2-S1_S8_peakcall_MACS2_rendition_1E-8_downsampled_try3_peak_582	128	5.84746	12.8808	10.1276	118
chr1	74499409	74499577	Project004-IPSHOCH-Exp5-ChIP-NPC-CTCF-IP-Blobel-Rep2-S1_S8_peakcall_MACS2_rendition_1E-8_downsampled_try3_peak_583	313	11.5625	31.3987	28.2354	102
chr1	74506859	74507136	Project004-IPSHOCH-Exp5-ChIP-NPC-CTCF-IP-Blobel-Rep2-S1_S8_peakcall_MACS2_rendition_1E-8_downsampled_try3_peak_584	503	22.0478	50.3653	46.7833	170
chr1	74690590	74690748	Project004-IPSHOCH-Exp5-ChIP-NPC-CTCF-IP-Blobel-Rep2-S1_S8_peakcall_MACS2_rendition_1E-8_downsampled_try3_peak_585	171	9.80769	17.1414	14.2785	50
chr1	74708231	74708369	Project004-IPSHOCH-Exp5-ChIP-NPC-CTCF-IP-Blobel-Rep2-S1_S8_peakcall_MACS2_rendition_1E-8_downsampled_try3_peak_586	296	14.1956	29.6239	26.4943	73
chr1	74759757	74759880	Project004-IPSHOCH-Exp5-ChIP-NPC-CTCF-IP-Blobel-Rep2-S1_S8_peakcall_MACS2_rendition_1E-8_downsampled_try3_peak_587	125	7.72712	12.5366	9.78792	54
chr1	74795488	74795660	Project004-IPSHOCH-Exp5-ChIP-NPC-CTCF-IP-Blobel-Rep2-S1_S8_peakcall_MACS2_rendition_1E-8_downsampled_try3_peak_588	280	12.1622	28.0497	24.9519	76
chr1	74806515	74806730	Project004-IPSHOCH-Exp5-ChIP-NPC-CTCF-IP-Blobel-Rep2-S1_S8_peakcall_MACS2_rendition_1E-8_downsampled_try3_peak_589	462	17.4324	46.2512	42.766	109
chr1	74809716	74809969	Project004-IPSHOCH-Exp5-ChIP-NPC-CTCF-IP-Blobel-Rep2-S1_S8_peakcall_MACS2_rendition_1E-8_downsampled_try3_peak_590	830	32.4915	83.031	78.6068	117
chr1	74822539	74822674	Project004-IPSHOCH-Exp5-ChIP-NPC-CTCF-IP-Blobel-Rep2-S1_S8_peakcall_MACS2_rendition_1E-8_downsampled_try3_peak_591	147	6.35593	14.7288	11.9194	49
chr1	74831143	74831352	Project004-IPSHOCH-Exp5-ChIP-NPC-CTCF-IP-Blobel-Rep2-S1_S8_peakcall_MACS2_rendition_1E-8_downsampled_try3_peak_592	307	12.973	30.7148	27.5609	88
chr1	74834465	74834718	Project004-IPSHOCH-Exp5-ChIP-NPC-CTCF-IP-Blobel-Rep2-S1_S8_peakcall_MACS2_rendition_1E-8_downsampled_try3_peak_593	268	8.57143	26.8926	23.8212	131
chr1	74849640	74849871	Project004-IPSHOCH-Exp5-ChIP-NPC-CTCF-IP-Blobel-Rep2-S1_S8_peakcall_MACS2_rendition_1E-8_downsampled_try3_peak_594	241	10.9459	24.1597	21.1477	104
chr1	74852932	74853225	Project004-IPSHOCH-Exp5-ChIP-NPC-CTCF-IP-Blobel-Rep2-S1_S8_peakcall_MACS2_rendition_1E-8_downsampled_try3_peak_595	214	11.6041	21.496	18.5379	100
chr1	74854705	74855003	Project004-IPSHOCH-Exp5-ChIP-NPC-CTCF-IP-Blobel-Rep2-S1_S8_peakcall_MACS2_rendition_1E-8_downsampled_try3_peak_596	484	12.6429	48.4151	44.8886	171
chr1	74927422	74927685	Project004-IPSHOCH-Exp5-ChIP-NPC-CTCF-IP-Blobel-Rep2-S1_S8_peakcall_MACS2_rendition_1E-8_downsampled_try3_peak_597	521	12.2222	52.1494	48.5286	122
chr1	74940111	74940325	Project004-IPSHOCH-Exp5-ChIP-NPC-CTCF-IP-Blobel-Rep2-S1_S8_peakcall_MACS2_rendition_1E-8_downsampled_try3_peak_598	451	11.1111	45.1914	41.7307	108
chr1	74941599	74941802	Project004-IPSHOCH-Exp5-ChIP-NPC-CTCF-IP-Blobel-Rep2-S1_S8_peakcall_MACS2_rendition_1E-8_downsampled_try3_peak_599	517	20.6492	51.7617	48.1561	97
chr1	74948324	74948556	Project004-IPSHOCH-Exp5-ChIP-NPC-CTCF-IP-Blobel-Rep2-S1_S8_peakcall_MACS2_rendition_1E-8_downsampled_try3_peak_600	341	15.7729	34.1464	30.9231	111
chr1	74973357	74973590	Project004-IPSHOCH-Exp5-ChIP-NPC-CTCF-IP-Blobel-Rep2-S1_S8_peakcall_MACS2_rendition_1E-8_downsampled_try3_peak_601	645	26.6894	64.5131	60.5886	100
chr1	74995454	74995660	Project004-IPSHOCH-Exp5-ChIP-NPC-CTCF-IP-Blobel-Rep2-S1_S8_peakcall_MACS2_rendition_1E-8_downsampled_try3_peak_602	411	12.4576	41.1311	37.7632	111
chr1	75011137	75011362	Project004-IPSHOCH-Exp5-ChIP-NPC-CTCF-IP-Blobel-Rep2-S1_S8_peakcall_MACS2_rendition_1E-8_downsampled_try3_peak_603	552	19.8649	55.2579	51.5604	83
chr1	75047155	75047375	Project004-IPSHOCH-Exp5-ChIP-NPC-CTCF-IP-Blobel-Rep2-S1_S8_peakcall_MACS2_rendition_1E-8_downsampled_try3_peak_604	450	20.1923	45.0382	41.5819	118
chr1	75063517	75063770	Project004-IPSHOCH-Exp5-ChIP-NPC-CTCF-IP-Blobel-Rep2-S1_S8_peakcall_MACS2_rendition_1E-8_downsampled_try3_peak_605	580	17.8125	58.0283	54.2689	132
chr1	75098764	75098974	Project004-IPSHOCH-Exp5-ChIP-NPC-CTCF-IP-Blobel-Rep2-S1_S8_peakcall_MACS2_rendition_1E-8_downsampled_try3_peak_606	392	16.8075	39.2675	35.9351	117
chr1	75121122	75121334	Project004-IPSHOCH-Exp5-ChIP-NPC-CTCF-IP-Blobel-Rep2-S1_S8_peakcall_MACS2_rendition_1E-8_downsampled_try3_peak_607	619	21.3152	61.9916	58.1307	107
chr1	75139263	75139481	Project004-IPSHOCH-Exp5-ChIP-NPC-CTCF-IP-Blobel-Rep2-S1_S8_peakcall_MACS2_rendition_1E-8_downsampled_try3_peak_608	600	21.6745	60.0706	56.2557	117
chr1	75231271	75231557	Project004-IPSHOCH-Exp5-ChIP-NPC-CTCF-IP-Blobel-Rep2-S1_S8_peakcall_MACS2_rendition_1E-8_downsampled_try3_peak_609	447	17.027	44.7837	41.3346	129
chr1	75248268	75248499	Project004-IPSHOCH-Exp5-ChIP-NPC-CTCF-IP-Blobel-Rep2-S1_S8_peakcall_MACS2_rendition_1E-8_downsampled_try3_peak_610	536	23.0769	53.6102	49.9576	114
chr1	75250868	75251135	Project004-IPSHOCH-Exp5-ChIP-NPC-CTCF-IP-Blobel-Rep2-S1_S8_peakcall_MACS2_rendition_1E-8_downsampled_try3_peak_611	1098	40.3846	109.821	104.768	151
chr1	75287295	75287508	Project004-IPSHOCH-Exp5-ChIP-NPC-CTCF-IP-Blobel-Rep2-S1_S8_peakcall_MACS2_rendition_1E-8_downsampled_try3_peak_612	518	22.5	51.8733	48.2623	94
chr1	75314539	75314860	Project004-IPSHOCH-Exp5-ChIP-NPC-CTCF-IP-Blobel-Rep2-S1_S8_peakcall_MACS2_rendition_1E-8_downsampled_try3_peak_613	443	15.5483	44.398	40.9574	98
chr1	75339490	75339762	Project004-IPSHOCH-Exp5-ChIP-NPC-CTCF-IP-Blobel-Rep2-S1_S8_peakcall_MACS2_rendition_1E-8_downsampled_try3_peak_614	808	31.7308	80.8249	76.4573	118
chr1	75368112	75368255	Project004-IPSHOCH-Exp5-ChIP-NPC-CTCF-IP-Blobel-Rep2-S1_S8_peakcall_MACS2_rendition_1E-8_downsampled_try3_peak_615	241	10.9459	24.1597	21.1477	68
chr1	75395342	75395554	Project004-IPSHOCH-Exp5-ChIP-NPC-CTCF-IP-Blobel-Rep2-S1_S8_peakcall_MACS2_rendition_1E-8_downsampled_try3_peak_616	326	11.875	32.6367	29.4451	117
chr1	75410469	75410604	Project004-IPSHOCH-Exp5-ChIP-NPC-CTCF-IP-Blobel-Rep2-S1_S8_peakcall_MACS2_rendition_1E-8_downsampled_try3_peak_617	171	9.80769	17.1414	14.2785	45
chr1	75422460	75422669	Project004-IPSHOCH-Exp5-ChIP-NPC-CTCF-IP-Blobel-Rep2-S1_S8_peakcall_MACS2_rendition_1E-8_downsampled_try3_peak_618	537	19.4595	53.7338	50.0722	98
chr1	75442355	75442612	Project004-IPSHOCH-Exp5-ChIP-NPC-CTCF-IP-Blobel-Rep2-S1_S8_peakcall_MACS2_rendition_1E-8_downsampled_try3_peak_619	980	36.9231	98.0377	93.2367	137
chr1	75453411	75453557	Project004-IPSHOCH-Exp5-ChIP-NPC-CTCF-IP-Blobel-Rep2-S1_S8_peakcall_MACS2_rendition_1E-8_downsampled_try3_peak_620	200	11.0239	20.0537	17.1237	84
chr1	75453733	75453867	Project004-IPSHOCH-Exp5-ChIP-NPC-CTCF-IP-Blobel-Rep2-S1_S8_peakcall_MACS2_rendition_1E-8_downsampled_try3_peak_621	200	11.0239	20.0537	17.1237	102
chr1	75464260	75464510	Project004-IPSHOCH-Exp5-ChIP-NPC-CTCF-IP-Blobel-Rep2-S1_S8_peakcall_MACS2_rendition_1E-8_downsampled_try3_peak_622	831	23.125	83.1228	78.6957	118
chr1	75473790	75474338	Project004-IPSHOCH-Exp5-ChIP-NPC-CTCF-IP-Blobel-Rep2-S1_S8_peakcall_MACS2_rendition_1E-8_downsampled_try3_peak_623	811	31.9113	81.1422	76.7675	127
chr1	75491862	75492065	Project004-IPSHOCH-Exp5-ChIP-NPC-CTCF-IP-Blobel-Rep2-S1_S8_peakcall_MACS2_rendition_1E-8_downsampled_try3_peak_624	552	23.1814	55.2951	51.5951	95
chr1	75543334	75543506	Project004-IPSHOCH-Exp5-ChIP-NPC-CTCF-IP-Blobel-Rep2-S1_S8_peakcall_MACS2_rendition_1E-8_downsampled_try3_peak_625	132	8.12287	13.2009	10.4334	108
chr1	75556151	75556441	Project004-IPSHOCH-Exp5-ChIP-NPC-CTCF-IP-Blobel-Rep2-S1_S8_peakcall_MACS2_rendition_1E-8_downsampled_try3_peak_626	821	16.6667	82.1506	77.7576	133
chr1	75594259	75594540	Project004-IPSHOCH-Exp5-ChIP-NPC-CTCF-IP-Blobel-Rep2-S1_S8_peakcall_MACS2_rendition_1E-8_downsampled_try3_peak_627	887	34.2321	88.743	84.1726	163
chr1	75649150	75649343	Project004-IPSHOCH-Exp5-ChIP-NPC-CTCF-IP-Blobel-Rep2-S1_S8_peakcall_MACS2_rendition_1E-8_downsampled_try3_peak_628	314	13.026	31.458	28.2943	116
chr1	75650154	75650492	Project004-IPSHOCH-Exp5-ChIP-NPC-CTCF-IP-Blobel-Rep2-S1_S8_peakcall_MACS2_rendition_1E-8_downsampled_try3_peak_629	815	31.1503	81.5792	77.197	141
chr1	75922375	75922610	Project004-IPSHOCH-Exp5-ChIP-NPC-CTCF-IP-Blobel-Rep2-S1_S8_peakcall_MACS2_rendition_1E-8_downsampled_try3_peak_630	711	28.1488	71.1545	67.053	108
chr1	77510184	77510309	Project004-IPSHOCH-Exp5-ChIP-NPC-CTCF-IP-Blobel-Rep2-S1_S8_peakcall_MACS2_rendition_1E-8_downsampled_try3_peak_631	204	9.72973	20.4115	17.4743	31
chr1	77512944	77513141	Project004-IPSHOCH-Exp5-ChIP-NPC-CTCF-IP-Blobel-Rep2-S1_S8_peakcall_MACS2_rendition_1E-8_downsampled_try3_peak_632	697	24.7481	69.7158	65.6513	84
chr1	77558496	77558619	Project004-IPSHOCH-Exp5-ChIP-NPC-CTCF-IP-Blobel-Rep2-S1_S8_peakcall_MACS2_rendition_1E-8_downsampled_try3_peak_633	157	9.23077	15.7752	12.9422	84
chr1	77586123	77586310	Project004-IPSHOCH-Exp5-ChIP-NPC-CTCF-IP-Blobel-Rep2-S1_S8_peakcall_MACS2_rendition_1E-8_downsampled_try3_peak_634	196	7.62712	19.6337	16.7192	77
chr1	77892911	77893192	Project004-IPSHOCH-Exp5-ChIP-NPC-CTCF-IP-Blobel-Rep2-S1_S8_peakcall_MACS2_rendition_1E-8_downsampled_try3_peak_635	385	17.9864	38.5762	35.2632	115
chr1	77939676	77939989	Project004-IPSHOCH-Exp5-ChIP-NPC-CTCF-IP-Blobel-Rep2-S1_S8_peakcall_MACS2_rendition_1E-8_downsampled_try3_peak_636	706	27.3396	70.6202	66.5361	196
chr1	77969011	77969215	Project004-IPSHOCH-Exp5-ChIP-NPC-CTCF-IP-Blobel-Rep2-S1_S8_peakcall_MACS2_rendition_1E-8_downsampled_try3_peak_637	450	20.1923	45.0382	41.5819	93
chr1	77975363	77975557	Project004-IPSHOCH-Exp5-ChIP-NPC-CTCF-IP-Blobel-Rep2-S1_S8_peakcall_MACS2_rendition_1E-8_downsampled_try3_peak_638	411	12.4576	41.1311	37.7632	86
chr1	78005433	78005629	Project004-IPSHOCH-Exp5-ChIP-NPC-CTCF-IP-Blobel-Rep2-S1_S8_peakcall_MACS2_rendition_1E-8_downsampled_try3_peak_639	288	14.4231	28.8642	25.7559	96
chr1	78212303	78212454	Project004-IPSHOCH-Exp5-ChIP-NPC-CTCF-IP-Blobel-Rep2-S1_S8_peakcall_MACS2_rendition_1E-8_downsampled_try3_peak_640	164	9.38293	16.423	13.5789	66
chr1	78416255	78416510	Project004-IPSHOCH-Exp5-ChIP-NPC-CTCF-IP-Blobel-Rep2-S1_S8_peakcall_MACS2_rendition_1E-8_downsampled_try3_peak_641	566	17.5	56.6146	52.8939	115
chr1	78451346	78451625	Project004-IPSHOCH-Exp5-ChIP-NPC-CTCF-IP-Blobel-Rep2-S1_S8_peakcall_MACS2_rendition_1E-8_downsampled_try3_peak_642	404	15.8108	40.4434	37.0817	90
chr1	78521810	78522143	Project004-IPSHOCH-Exp5-ChIP-NPC-CTCF-IP-Blobel-Rep2-S1_S8_peakcall_MACS2_rendition_1E-8_downsampled_try3_peak_643	1363	33.4375	136.396	130.874	166
chr1	78533460	78533655	Project004-IPSHOCH-Exp5-ChIP-NPC-CTCF-IP-Blobel-Rep2-S1_S8_peakcall_MACS2_rendition_1E-8_downsampled_try3_peak_644	499	14.2373	49.9306	46.3671	103
chr1	78721068	78721326	Project004-IPSHOCH-Exp5-ChIP-NPC-CTCF-IP-Blobel-Rep2-S1_S8_peakcall_MACS2_rendition_1E-8_downsampled_try3_peak_645	583	20.6757	58.3323	54.5591	155
chr1	78722533	78722724	Project004-IPSHOCH-Exp5-ChIP-NPC-CTCF-IP-Blobel-Rep2-S1_S8_peakcall_MACS2_rendition_1E-8_downsampled_try3_peak_646	211	6.85185	21.1886	18.2411	76
chr1	79636839	79637059	Project004-IPSHOCH-Exp5-ChIP-NPC-CTCF-IP-Blobel-Rep2-S1_S8_peakcall_MACS2_rendition_1E-8_downsampled_try3_peak_647	482	15.625	48.2983	44.7729	99
chr1	79679644	79679862	Project004-IPSHOCH-Exp5-ChIP-NPC-CTCF-IP-Blobel-Rep2-S1_S8_peakcall_MACS2_rendition_1E-8_downsampled_try3_peak_648	242	12.6463	24.2394	21.2245	65
chr1	79779168	79779305	Project004-IPSHOCH-Exp5-ChIP-NPC-CTCF-IP-Blobel-Rep2-S1_S8_peakcall_MACS2_rendition_1E-8_downsampled_try3_peak_649	151	8.831	15.1008	12.2865	70
chr1	79783152	79783322	Project004-IPSHOCH-Exp5-ChIP-NPC-CTCF-IP-Blobel-Rep2-S1_S8_peakcall_MACS2_rendition_1E-8_downsampled_try3_peak_650	213	11.4966	21.3114	18.3622	83
chr1	79995752	79995948	Project004-IPSHOCH-Exp5-ChIP-NPC-CTCF-IP-Blobel-Rep2-S1_S8_peakcall_MACS2_rendition_1E-8_downsampled_try3_peak_651	339	16.0062	33.9132	30.6935	89
chr1	80102973	80103188	Project004-IPSHOCH-Exp5-ChIP-NPC-CTCF-IP-Blobel-Rep2-S1_S8_peakcall_MACS2_rendition_1E-8_downsampled_try3_peak_652	394	17.3016	39.4011	36.068	104
chr1	80174674	80174855	Project004-IPSHOCH-Exp5-ChIP-NPC-CTCF-IP-Blobel-Rep2-S1_S8_peakcall_MACS2_rendition_1E-8_downsampled_try3_peak_653	451	19.4532	45.1774	41.7168	93
chr1	80176857	80177034	Project004-IPSHOCH-Exp5-ChIP-NPC-CTCF-IP-Blobel-Rep2-S1_S8_peakcall_MACS2_rendition_1E-8_downsampled_try3_peak_654	241	10.9459	24.1597	21.1477	93
chr1	80177663	80177880	Project004-IPSHOCH-Exp5-ChIP-NPC-CTCF-IP-Blobel-Rep2-S1_S8_peakcall_MACS2_rendition_1E-8_downsampled_try3_peak_655	389	13.4375	38.9902	35.6672	107
chr1	80240788	80240911	Project004-IPSHOCH-Exp5-ChIP-NPC-CTCF-IP-Blobel-Rep2-S1_S8_peakcall_MACS2_rendition_1E-8_downsampled_try3_peak_656	156	8.93796	15.682	12.8542	74
chr1	80405164	80405396	Project004-IPSHOCH-Exp5-ChIP-NPC-CTCF-IP-Blobel-Rep2-S1_S8_peakcall_MACS2_rendition_1E-8_downsampled_try3_peak_657	388	15.7246	38.8526	35.534	112
chr1	80501430	80501587	Project004-IPSHOCH-Exp5-ChIP-NPC-CTCF-IP-Blobel-Rep2-S1_S8_peakcall_MACS2_rendition_1E-8_downsampled_try3_peak_658	267	13.5156	26.763	23.6925	66
chr1	80509275	80509411	Project004-IPSHOCH-Exp5-ChIP-NPC-CTCF-IP-Blobel-Rep2-S1_S8_peakcall_MACS2_rendition_1E-8_downsampled_try3_peak_659	199	10.9615	19.9467	17.0228	42
chr1	80512550	80512820	Project004-IPSHOCH-Exp5-ChIP-NPC-CTCF-IP-Blobel-Rep2-S1_S8_peakcall_MACS2_rendition_1E-8_downsampled_try3_peak_660	329	15.0587	32.9425	29.747	80
chr1	80724829	80725044	Project004-IPSHOCH-Exp5-ChIP-NPC-CTCF-IP-Blobel-Rep2-S1_S8_peakcall_MACS2_rendition_1E-8_downsampled_try3_peak_661	243	12.6923	24.3186	21.2979	99
chr1	80827037	80827259	Project004-IPSHOCH-Exp5-ChIP-NPC-CTCF-IP-Blobel-Rep2-S1_S8_peakcall_MACS2_rendition_1E-8_downsampled_try3_peak_662	536	23.0769	53.6102	49.9576	107
chr1	81283832	81284053	Project004-IPSHOCH-Exp5-ChIP-NPC-CTCF-IP-Blobel-Rep2-S1_S8_peakcall_MACS2_rendition_1E-8_downsampled_try3_peak_663	469	19.2086	46.9946	43.4876	100
chr1	81297428	81297636	Project004-IPSHOCH-Exp5-ChIP-NPC-CTCF-IP-Blobel-Rep2-S1_S8_peakcall_MACS2_rendition_1E-8_downsampled_try3_peak_664	451	19.8697	45.1733	41.7145	103
chr1	81298375	81298570	Project004-IPSHOCH-Exp5-ChIP-NPC-CTCF-IP-Blobel-Rep2-S1_S8_peakcall_MACS2_rendition_1E-8_downsampled_try3_peak_665	533	21.5842	53.3484	49.7083	106
chr1	81306796	81306950	Project004-IPSHOCH-Exp5-ChIP-NPC-CTCF-IP-Blobel-Rep2-S1_S8_peakcall_MACS2_rendition_1E-8_downsampled_try3_peak_666	383	17.8846	38.3991	35.0913	61
chr1	81313233	81313437	Project004-IPSHOCH-Exp5-ChIP-NPC-CTCF-IP-Blobel-Rep2-S1_S8_peakcall_MACS2_rendition_1E-8_downsampled_try3_peak_667	718	29.0102	71.8183	67.6939	96
chr1	81513178	81513393	Project004-IPSHOCH-Exp5-ChIP-NPC-CTCF-IP-Blobel-Rep2-S1_S8_peakcall_MACS2_rendition_1E-8_downsampled_try3_peak_668	168	8.51351	16.8225	13.9686	142
chr1	82288244	82288417	Project004-IPSHOCH-Exp5-ChIP-NPC-CTCF-IP-Blobel-Rep2-S1_S8_peakcall_MACS2_rendition_1E-8_downsampled_try3_peak_669	431	19.1274	43.1997	39.7921	70
chr1	82290793	82290990	Project004-IPSHOCH-Exp5-ChIP-NPC-CTCF-IP-Blobel-Rep2-S1_S8_peakcall_MACS2_rendition_1E-8_downsampled_try3_peak_670	492	18.2432	49.2158	45.6608	98
chr1	82430023	82430239	Project004-IPSHOCH-Exp5-ChIP-NPC-CTCF-IP-Blobel-Rep2-S1_S8_peakcall_MACS2_rendition_1E-8_downsampled_try3_peak_671	569	20.8245	56.9262	53.1887	103
chr1	82472916	82473165	Project004-IPSHOCH-Exp5-ChIP-NPC-CTCF-IP-Blobel-Rep2-S1_S8_peakcall_MACS2_rendition_1E-8_downsampled_try3_peak_672	577	15.7627	57.7747	54.02	129
chr1	82550964	82551190	Project004-IPSHOCH-Exp5-ChIP-NPC-CTCF-IP-Blobel-Rep2-S1_S8_peakcall_MACS2_rendition_1E-8_downsampled_try3_peak_673	359	16.0626	35.9467	32.6906	103
chr1	82568463	82568647	Project004-IPSHOCH-Exp5-ChIP-NPC-CTCF-IP-Blobel-Rep2-S1_S8_peakcall_MACS2_rendition_1E-8_downsampled_try3_peak_674	199	10.9615	19.9467	17.0228	67
chr1	82638303	82638574	Project004-IPSHOCH-Exp5-ChIP-NPC-CTCF-IP-Blobel-Rep2-S1_S8_peakcall_MACS2_rendition_1E-8_downsampled_try3_peak_675	496	15.9375	49.6638	46.1027	161
chr1	82756227	82756390	Project004-IPSHOCH-Exp5-ChIP-NPC-CTCF-IP-Blobel-Rep2-S1_S8_peakcall_MACS2_rendition_1E-8_downsampled_try3_peak_676	213	11.5385	21.3832	18.4295	89
chr1	82783983	82784200	Project004-IPSHOCH-Exp5-ChIP-NPC-CTCF-IP-Blobel-Rep2-S1_S8_peakcall_MACS2_rendition_1E-8_downsampled_try3_peak_677	447	17.027	44.7837	41.3346	114
chr1	82800301	82800457	Project004-IPSHOCH-Exp5-ChIP-NPC-CTCF-IP-Blobel-Rep2-S1_S8_peakcall_MACS2_rendition_1E-8_downsampled_try3_peak_678	134	5.57143	13.464	10.6862	74
chr1	82835846	82836081	Project004-IPSHOCH-Exp5-ChIP-NPC-CTCF-IP-Blobel-Rep2-S1_S8_peakcall_MACS2_rendition_1E-8_downsampled_try3_peak_679	955	25.625	95.5421	90.8072	122
chr1	82984461	82984670	Project004-IPSHOCH-Exp5-ChIP-NPC-CTCF-IP-Blobel-Rep2-S1_S8_peakcall_MACS2_rendition_1E-8_downsampled_try3_peak_680	660	27.1154	66.0553	62.0933	94
chr1	83061480	83061680	Project004-IPSHOCH-Exp5-ChIP-NPC-CTCF-IP-Blobel-Rep2-S1_S8_peakcall_MACS2_rendition_1E-8_downsampled_try3_peak_681	301	11.25	30.1722	27.036	80
chr1	83072765	83073024	Project004-IPSHOCH-Exp5-ChIP-NPC-CTCF-IP-Blobel-Rep2-S1_S8_peakcall_MACS2_rendition_1E-8_downsampled_try3_peak_682	630	21.8919	63.0066	59.1167	121
chr1	83178085	83178279	Project004-IPSHOCH-Exp5-ChIP-NPC-CTCF-IP-Blobel-Rep2-S1_S8_peakcall_MACS2_rendition_1E-8_downsampled_try3_peak_683	241	10.9459	24.1597	21.1477	86
chr1	83183847	83184026	Project004-IPSHOCH-Exp5-ChIP-NPC-CTCF-IP-Blobel-Rep2-S1_S8_peakcall_MACS2_rendition_1E-8_downsampled_try3_peak_684	319	15.5769	31.9808	28.8083	76
chr1	83219748	83219881	Project004-IPSHOCH-Exp5-ChIP-NPC-CTCF-IP-Blobel-Rep2-S1_S8_peakcall_MACS2_rendition_1E-8_downsampled_try3_peak_685	145	8.70307	14.5188	11.7163	33
chr1	83713732	83713899	Project004-IPSHOCH-Exp5-ChIP-NPC-CTCF-IP-Blobel-Rep2-S1_S8_peakcall_MACS2_rendition_1E-8_downsampled_try3_peak_686	385	17.9864	38.5762	35.2632	89
chr1	83723810	83723952	Project004-IPSHOCH-Exp5-ChIP-NPC-CTCF-IP-Blobel-Rep2-S1_S8_peakcall_MACS2_rendition_1E-8_downsampled_try3_peak_687	216	10.1351	21.6442	18.6794	80
chr1	83733117	83733279	Project004-IPSHOCH-Exp5-ChIP-NPC-CTCF-IP-Blobel-Rep2-S1_S8_peakcall_MACS2_rendition_1E-8_downsampled_try3_peak_688	273	13.8461	27.331	24.2518	70
chr1	83742700	83742939	Project004-IPSHOCH-Exp5-ChIP-NPC-CTCF-IP-Blobel-Rep2-S1_S8_peakcall_MACS2_rendition_1E-8_downsampled_try3_peak_689	202	6.66667	20.2624	17.3306	79
chr1	83807849	83808027	Project004-IPSHOCH-Exp5-ChIP-NPC-CTCF-IP-Blobel-Rep2-S1_S8_peakcall_MACS2_rendition_1E-8_downsampled_try3_peak_690	383	17.8846	38.3991	35.0913	86
chr1	84125192	84125378	Project004-IPSHOCH-Exp5-ChIP-NPC-CTCF-IP-Blobel-Rep2-S1_S8_peakcall_MACS2_rendition_1E-8_downsampled_try3_peak_691	335	16.1538	33.5631	30.3543	100
chr1	84150641	84150784	Project004-IPSHOCH-Exp5-ChIP-NPC-CTCF-IP-Blobel-Rep2-S1_S8_peakcall_MACS2_rendition_1E-8_downsampled_try3_peak_692	154	7.1875	15.4506	12.6326	107
chr1	84279712	84279945	Project004-IPSHOCH-Exp5-ChIP-NPC-CTCF-IP-Blobel-Rep2-S1_S8_peakcall_MACS2_rendition_1E-8_downsampled_try3_peak_693	277	10.625	27.7551	24.6665	117
chr1	84283507	84283746	Project004-IPSHOCH-Exp5-ChIP-NPC-CTCF-IP-Blobel-Rep2-S1_S8_peakcall_MACS2_rendition_1E-8_downsampled_try3_peak_694	351	12.5	35.1463	31.9064	104
chr1	84430296	84430463	Project004-IPSHOCH-Exp5-ChIP-NPC-CTCF-IP-Blobel-Rep2-S1_S8_peakcall_MACS2_rendition_1E-8_downsampled_try3_peak_695	259	13.3447	25.9459	22.8918	102
chr1	84467074	84467223	Project004-IPSHOCH-Exp5-ChIP-NPC-CTCF-IP-Blobel-Rep2-S1_S8_peakcall_MACS2_rendition_1E-8_downsampled_try3_peak_696	191	9.32432	19.1965	16.2856	44
chr1	84578428	84578658	Project004-IPSHOCH-Exp5-ChIP-NPC-CTCF-IP-Blobel-Rep2-S1_S8_peakcall_MACS2_rendition_1E-8_downsampled_try3_peak_697	303	14.9456	30.3203	27.1838	145
chr1	84692776	84692983	Project004-IPSHOCH-Exp5-ChIP-NPC-CTCF-IP-Blobel-Rep2-S1_S8_peakcall_MACS2_rendition_1E-8_downsampled_try3_peak_698	404	15.8108	40.4434	37.0817	106
chr1	84693661	84694165	Project004-IPSHOCH-Exp5-ChIP-NPC-CTCF-IP-Blobel-Rep2-S1_S8_peakcall_MACS2_rendition_1E-8_downsampled_try3_peak_699	399	16.3514	39.9231	36.5856	377
chr1	84730494	84730686	Project004-IPSHOCH-Exp5-ChIP-NPC-CTCF-IP-Blobel-Rep2-S1_S8_peakcall_MACS2_rendition_1E-8_downsampled_try3_peak_700	485	20.9736	48.5029	44.9659	92
chr1	84881872	84882025	Project004-IPSHOCH-Exp5-ChIP-NPC-CTCF-IP-Blobel-Rep2-S1_S8_peakcall_MACS2_rendition_1E-8_downsampled_try3_peak_701	214	11.6041	21.496	18.5379	65
chr1	84930128	84930395	Project004-IPSHOCH-Exp5-ChIP-NPC-CTCF-IP-Blobel-Rep2-S1_S8_peakcall_MACS2_rendition_1E-8_downsampled_try3_peak_702	469	15.3125	46.9413	43.4356	111
chr1	85111435	85111574	Project004-IPSHOCH-Exp5-ChIP-NPC-CTCF-IP-Blobel-Rep2-S1_S8_peakcall_MACS2_rendition_1E-8_downsampled_try3_peak_703	388	15.7246	38.8526	35.534	65
chr1	85319867	85320063	Project004-IPSHOCH-Exp5-ChIP-NPC-CTCF-IP-Blobel-Rep2-S1_S8_peakcall_MACS2_rendition_1E-8_downsampled_try3_peak_704	552	17.1875	55.2085	51.5189	110
chr1	87633126	87633396	Project004-IPSHOCH-Exp5-ChIP-NPC-CTCF-IP-Blobel-Rep2-S1_S8_peakcall_MACS2_rendition_1E-8_downsampled_try3_peak_705	845	32.8846	84.5985	80.136	127
chr1	87689838	87690077	Project004-IPSHOCH-Exp5-ChIP-NPC-CTCF-IP-Blobel-Rep2-S1_S8_peakcall_MACS2_rendition_1E-8_downsampled_try3_peak_706	725	20.9375	72.5608	68.4224	99
chr1	87749894	87750253	Project004-IPSHOCH-Exp5-ChIP-NPC-CTCF-IP-Blobel-Rep2-S1_S8_peakcall_MACS2_rendition_1E-8_downsampled_try3_peak_707	1931	54.3574	193.164	186.623	185
chr1	87792175	87792381	Project004-IPSHOCH-Exp5-ChIP-NPC-CTCF-IP-Blobel-Rep2-S1_S8_peakcall_MACS2_rendition_1E-8_downsampled_try3_peak_708	219	9.0625	21.9387	18.9685	113
chr1	87832104	87832337	Project004-IPSHOCH-Exp5-ChIP-NPC-CTCF-IP-Blobel-Rep2-S1_S8_peakcall_MACS2_rendition_1E-8_downsampled_try3_peak_709	462	17.4324	46.2512	42.766	96
chr1	87904494	87904799	Project004-IPSHOCH-Exp5-ChIP-NPC-CTCF-IP-Blobel-Rep2-S1_S8_peakcall_MACS2_rendition_1E-8_downsampled_try3_peak_710	790	25.9459	79.0852	74.763	108
chr1	87956062	87956349	Project004-IPSHOCH-Exp5-ChIP-NPC-CTCF-IP-Blobel-Rep2-S1_S8_peakcall_MACS2_rendition_1E-8_downsampled_try3_peak_711	865	32.4696	86.5823	82.0699	164
chr1	87960765	87961007	Project004-IPSHOCH-Exp5-ChIP-NPC-CTCF-IP-Blobel-Rep2-S1_S8_peakcall_MACS2_rendition_1E-8_downsampled_try3_peak_712	671	25.8338	67.1854	63.1921	137
chr1	88075414	88075834	Project004-IPSHOCH-Exp5-ChIP-NPC-CTCF-IP-Blobel-Rep2-S1_S8_peakcall_MACS2_rendition_1E-8_downsampled_try3_peak_713	2045	63.0915	204.589	197.753	188
chr1	88110803	88111020	Project004-IPSHOCH-Exp5-ChIP-NPC-CTCF-IP-Blobel-Rep2-S1_S8_peakcall_MACS2_rendition_1E-8_downsampled_try3_peak_714	759	28.9169	75.952	71.7142	94
chr1	88210465	88210612	Project004-IPSHOCH-Exp5-ChIP-NPC-CTCF-IP-Blobel-Rep2-S1_S8_peakcall_MACS2_rendition_1E-8_downsampled_try3_peak_715	288	14.4231	28.8642	25.7559	61
chr1	88236074	88236338	Project004-IPSHOCH-Exp5-ChIP-NPC-CTCF-IP-Blobel-Rep2-S1_S8_peakcall_MACS2_rendition_1E-8_downsampled_try3_peak_716	922	35.1923	92.2354	87.5823	122
chr1	88245479	88245636	Project004-IPSHOCH-Exp5-ChIP-NPC-CTCF-IP-Blobel-Rep2-S1_S8_peakcall_MACS2_rendition_1E-8_downsampled_try3_peak_717	145	8.70307	14.5188	11.7163	87
chr1	88260397	88260522	Project004-IPSHOCH-Exp5-ChIP-NPC-CTCF-IP-Blobel-Rep2-S1_S8_peakcall_MACS2_rendition_1E-8_downsampled_try3_peak_718	158	9.28328	15.8647	13.0259	32
chr1	88268625	88268805	Project004-IPSHOCH-Exp5-ChIP-NPC-CTCF-IP-Blobel-Rep2-S1_S8_peakcall_MACS2_rendition_1E-8_downsampled_try3_peak_719	452	19.0744	45.2675	41.801	94
chr1	88285925	88286214	Project004-IPSHOCH-Exp5-ChIP-NPC-CTCF-IP-Blobel-Rep2-S1_S8_peakcall_MACS2_rendition_1E-8_downsampled_try3_peak_720	864	33.4615	86.4967	81.9846	121
chr1	88301512	88301710	Project004-IPSHOCH-Exp5-ChIP-NPC-CTCF-IP-Blobel-Rep2-S1_S8_peakcall_MACS2_rendition_1E-8_downsampled_try3_peak_721	171	9.80769	17.1414	14.2785	122
chr1	88312585	88312757	Project004-IPSHOCH-Exp5-ChIP-NPC-CTCF-IP-Blobel-Rep2-S1_S8_peakcall_MACS2_rendition_1E-8_downsampled_try3_peak_722	186	10.4437	18.6335	15.7332	83
chr1	88312895	88313191	Project004-IPSHOCH-Exp5-ChIP-NPC-CTCF-IP-Blobel-Rep2-S1_S8_peakcall_MACS2_rendition_1E-8_downsampled_try3_peak_723	890	28.3784	89.0631	84.4835	110
chr1	88326567	88326904	Project004-IPSHOCH-Exp5-ChIP-NPC-CTCF-IP-Blobel-Rep2-S1_S8_peakcall_MACS2_rendition_1E-8_downsampled_try3_peak_724	525	14.7458	52.516	48.8807	158
chr1	88335184	88335367	Project004-IPSHOCH-Exp5-ChIP-NPC-CTCF-IP-Blobel-Rep2-S1_S8_peakcall_MACS2_rendition_1E-8_downsampled_try3_peak_725	237	11.7284	23.7566	20.7548	95
chr1	88337146	88337339	Project004-IPSHOCH-Exp5-ChIP-NPC-CTCF-IP-Blobel-Rep2-S1_S8_peakcall_MACS2_rendition_1E-8_downsampled_try3_peak_726	333	9.85714	33.3413	30.1428	102
chr1	88396583	88396791	Project004-IPSHOCH-Exp5-ChIP-NPC-CTCF-IP-Blobel-Rep2-S1_S8_peakcall_MACS2_rendition_1E-8_downsampled_try3_peak_727	433	16.6216	43.3264	39.9111	106
chr1	88397670	88397840	Project004-IPSHOCH-Exp5-ChIP-NPC-CTCF-IP-Blobel-Rep2-S1_S8_peakcall_MACS2_rendition_1E-8_downsampled_try3_peak_728	279	8.78571	27.9421	24.8513	86
chr1	88398240	88398528	Project004-IPSHOCH-Exp5-ChIP-NPC-CTCF-IP-Blobel-Rep2-S1_S8_peakcall_MACS2_rendition_1E-8_downsampled_try3_peak_729	608	18.4375	60.8783	57.0443	104
chr1	88400769	88401001	Project004-IPSHOCH-Exp5-ChIP-NPC-CTCF-IP-Blobel-Rep2-S1_S8_peakcall_MACS2_rendition_1E-8_downsampled_try3_peak_730	351	12.5	35.1463	31.9064	121
chr1	88406000	88406217	Project004-IPSHOCH-Exp5-ChIP-NPC-CTCF-IP-Blobel-Rep2-S1_S8_peakcall_MACS2_rendition_1E-8_downsampled_try3_peak_731	524	16.5625	52.4199	48.7864	134
chr1	88421953	88422159	Project004-IPSHOCH-Exp5-ChIP-NPC-CTCF-IP-Blobel-Rep2-S1_S8_peakcall_MACS2_rendition_1E-8_downsampled_try3_peak_732	551	15.2542	55.131	51.4465	87
chr1	88424669	88425120	Project004-IPSHOCH-Exp5-ChIP-NPC-CTCF-IP-Blobel-Rep2-S1_S8_peakcall_MACS2_rendition_1E-8_downsampled_try3_peak_733	857	27.5676	85.7116	81.2193	284
chr1	88429001	88429249	Project004-IPSHOCH-Exp5-ChIP-NPC-CTCF-IP-Blobel-Rep2-S1_S8_peakcall_MACS2_rendition_1E-8_downsampled_try3_peak_734	861	25.6776	86.1106	81.6131	127
chr1	88495169	88495373	Project004-IPSHOCH-Exp5-ChIP-NPC-CTCF-IP-Blobel-Rep2-S1_S8_peakcall_MACS2_rendition_1E-8_downsampled_try3_peak_735	481	21.1591	48.1067	44.5856	111
chr1	88510953	88511086	Project004-IPSHOCH-Exp5-ChIP-NPC-CTCF-IP-Blobel-Rep2-S1_S8_peakcall_MACS2_rendition_1E-8_downsampled_try3_peak_736	241	10.9459	24.1597	21.1477	54
chr1	88515101	88515340	Project004-IPSHOCH-Exp5-ChIP-NPC-CTCF-IP-Blobel-Rep2-S1_S8_peakcall_MACS2_rendition_1E-8_downsampled_try3_peak_737	447	17.027	44.7837	41.3346	114
chr1	88546876	88547160	Project004-IPSHOCH-Exp5-ChIP-NPC-CTCF-IP-Blobel-Rep2-S1_S8_peakcall_MACS2_rendition_1E-8_downsampled_try3_peak_738	538	16.875	53.8102	50.1444	139
chr1	88566112	88566301	Project004-IPSHOCH-Exp5-ChIP-NPC-CTCF-IP-Blobel-Rep2-S1_S8_peakcall_MACS2_rendition_1E-8_downsampled_try3_peak_739	402	13.75	40.2917	36.9391	102
chr1	88567063	88567196	Project004-IPSHOCH-Exp5-ChIP-NPC-CTCF-IP-Blobel-Rep2-S1_S8_peakcall_MACS2_rendition_1E-8_downsampled_try3_peak_740	214	11.6041	21.496	18.5379	77
chr1	88595438	88595602	Project004-IPSHOCH-Exp5-ChIP-NPC-CTCF-IP-Blobel-Rep2-S1_S8_peakcall_MACS2_rendition_1E-8_downsampled_try3_peak_741	157	9.23077	15.7752	12.9422	69
chr1	88759654	88759777	Project004-IPSHOCH-Exp5-ChIP-NPC-CTCF-IP-Blobel-Rep2-S1_S8_peakcall_MACS2_rendition_1E-8_downsampled_try3_peak_742	145	8.70307	14.5188	11.7163	70
chr1	88864976	88865099	Project004-IPSHOCH-Exp5-ChIP-NPC-CTCF-IP-Blobel-Rep2-S1_S8_peakcall_MACS2_rendition_1E-8_downsampled_try3_peak_743	168	9.12409	16.8777	14.0228	53
chr1	88937721	88937986	Project004-IPSHOCH-Exp5-ChIP-NPC-CTCF-IP-Blobel-Rep2-S1_S8_peakcall_MACS2_rendition_1E-8_downsampled_try3_peak_744	537	19.4595	53.7338	50.0722	159
chr1	88938717	88939056	Project004-IPSHOCH-Exp5-ChIP-NPC-CTCF-IP-Blobel-Rep2-S1_S8_peakcall_MACS2_rendition_1E-8_downsampled_try3_peak_745	1204	42.4992	120.482	115.217	117
chr1	88967446	88967592	Project004-IPSHOCH-Exp5-ChIP-NPC-CTCF-IP-Blobel-Rep2-S1_S8_peakcall_MACS2_rendition_1E-8_downsampled_try3_peak_746	299	14.0548	29.9952	26.8632	55
chr1	88995200	88995455	Project004-IPSHOCH-Exp5-ChIP-NPC-CTCF-IP-Blobel-Rep2-S1_S8_peakcall_MACS2_rendition_1E-8_downsampled_try3_peak_747	566	22.0899	56.6187	52.8964	141
chr1	89008379	89008543	Project004-IPSHOCH-Exp5-ChIP-NPC-CTCF-IP-Blobel-Rep2-S1_S8_peakcall_MACS2_rendition_1E-8_downsampled_try3_peak_748	385	17.9864	38.5762	35.2632	81
chr1	89070914	89071155	Project004-IPSHOCH-Exp5-ChIP-NPC-CTCF-IP-Blobel-Rep2-S1_S8_peakcall_MACS2_rendition_1E-8_downsampled_try3_peak_749	693	23.5135	69.35	65.3014	144
chr1	89072325	89072644	Project004-IPSHOCH-Exp5-ChIP-NPC-CTCF-IP-Blobel-Rep2-S1_S8_peakcall_MACS2_rendition_1E-8_downsampled_try3_peak_750	501	21.5255	50.1847	46.6087	169
chr1	89081524	89081702	Project004-IPSHOCH-Exp5-ChIP-NPC-CTCF-IP-Blobel-Rep2-S1_S8_peakcall_MACS2_rendition_1E-8_downsampled_try3_peak_751	337	16.2457	33.7226	30.5085	88
chr1	89083646	89083920	Project004-IPSHOCH-Exp5-ChIP-NPC-CTCF-IP-Blobel-Rep2-S1_S8_peakcall_MACS2_rendition_1E-8_downsampled_try3_peak_752	886	30.3784	88.6736	84.1099	135
chr1	89114713	89114846	Project004-IPSHOCH-Exp5-ChIP-NPC-CTCF-IP-Blobel-Rep2-S1_S8_peakcall_MACS2_rendition_1E-8_downsampled_try3_peak_753	241	10.9459	24.1597	21.1477	60
chr1	89142776	89143092	Project004-IPSHOCH-Exp5-ChIP-NPC-CTCF-IP-Blobel-Rep2-S1_S8_peakcall_MACS2_rendition_1E-8_downsampled_try3_peak_754	823	26.7568	82.3854	77.9828	169
chr1	89189534	89189741	Project004-IPSHOCH-Exp5-ChIP-NPC-CTCF-IP-Blobel-Rep2-S1_S8_peakcall_MACS2_rendition_1E-8_downsampled_try3_peak_755	566	17.5	56.6146	52.8939	111
chr1	89223737	89223919	Project004-IPSHOCH-Exp5-ChIP-NPC-CTCF-IP-Blobel-Rep2-S1_S8_peakcall_MACS2_rendition_1E-8_downsampled_try3_peak_756	154	7.1875	15.4506	12.6326	83
chr1	89276611	89276753	Project004-IPSHOCH-Exp5-ChIP-NPC-CTCF-IP-Blobel-Rep2-S1_S8_peakcall_MACS2_rendition_1E-8_downsampled_try3_peak_757	169	9.46372	16.9833	14.126	86
chr1	89315373	89315547	Project004-IPSHOCH-Exp5-ChIP-NPC-CTCF-IP-Blobel-Rep2-S1_S8_peakcall_MACS2_rendition_1E-8_downsampled_try3_peak_758	190	10.4349	19.0527	16.1489	83
chr1	89344081	89344349	Project004-IPSHOCH-Exp5-ChIP-NPC-CTCF-IP-Blobel-Rep2-S1_S8_peakcall_MACS2_rendition_1E-8_downsampled_try3_peak_759	747	29.2527	74.7761	70.5764	169
chr1	89438249	89438461	Project004-IPSHOCH-Exp5-ChIP-NPC-CTCF-IP-Blobel-Rep2-S1_S8_peakcall_MACS2_rendition_1E-8_downsampled_try3_peak_760	435	19.3178	43.5262	40.104	109
chr1	89465017	89465226	Project004-IPSHOCH-Exp5-ChIP-NPC-CTCF-IP-Blobel-Rep2-S1_S8_peakcall_MACS2_rendition_1E-8_downsampled_try3_peak_761	199	10.9615	19.9467	17.0228	108
chr1	89505088	89505331	Project004-IPSHOCH-Exp5-ChIP-NPC-CTCF-IP-Blobel-Rep2-S1_S8_peakcall_MACS2_rendition_1E-8_downsampled_try3_peak_762	536	23.0769	53.6102	49.9576	113
chr1	89560712	89560862	Project004-IPSHOCH-Exp5-ChIP-NPC-CTCF-IP-Blobel-Rep2-S1_S8_peakcall_MACS2_rendition_1E-8_downsampled_try3_peak_763	171	9.80769	17.1414	14.2785	95
chr1	89618063	89618324	Project004-IPSHOCH-Exp5-ChIP-NPC-CTCF-IP-Blobel-Rep2-S1_S8_peakcall_MACS2_rendition_1E-8_downsampled_try3_peak_764	484	20.5047	48.4384	44.9052	121
chr1	89652386	89652532	Project004-IPSHOCH-Exp5-ChIP-NPC-CTCF-IP-Blobel-Rep2-S1_S8_peakcall_MACS2_rendition_1E-8_downsampled_try3_peak_765	208	8.75	20.8176	17.8726	85
chr1	89662930	89663115	Project004-IPSHOCH-Exp5-ChIP-NPC-CTCF-IP-Blobel-Rep2-S1_S8_peakcall_MACS2_rendition_1E-8_downsampled_try3_peak_766	319	15.5769	31.9808	28.8083	88
chr1	89819271	89819538	Project004-IPSHOCH-Exp5-ChIP-NPC-CTCF-IP-Blobel-Rep2-S1_S8_peakcall_MACS2_rendition_1E-8_downsampled_try3_peak_767	270	9.40678	27.0855	24.0124	174
chr1	89833213	89833370	Project004-IPSHOCH-Exp5-ChIP-NPC-CTCF-IP-Blobel-Rep2-S1_S8_peakcall_MACS2_rendition_1E-8_downsampled_try3_peak_768	191	9.32432	19.1965	16.2856	89
chr1	90017178	90017437	Project004-IPSHOCH-Exp5-ChIP-NPC-CTCF-IP-Blobel-Rep2-S1_S8_peakcall_MACS2_rendition_1E-8_downsampled_try3_peak_769	800	22.5	80.0747	75.7327	146
chr1	90018082	90018363	Project004-IPSHOCH-Exp5-ChIP-NPC-CTCF-IP-Blobel-Rep2-S1_S8_peakcall_MACS2_rendition_1E-8_downsampled_try3_peak_770	214	11.6041	21.496	18.5379	212
chr1	90040669	90041184	Project004-IPSHOCH-Exp5-ChIP-NPC-CTCF-IP-Blobel-Rep2-S1_S8_peakcall_MACS2_rendition_1E-8_downsampled_try3_peak_771	907	28.7838	90.7481	86.1224	377
chr1	90041835	90042121	Project004-IPSHOCH-Exp5-ChIP-NPC-CTCF-IP-Blobel-Rep2-S1_S8_peakcall_MACS2_rendition_1E-8_downsampled_try3_peak_772	301	11.25	30.1722	27.036	189
chr1	90174099	90174415	Project004-IPSHOCH-Exp5-ChIP-NPC-CTCF-IP-Blobel-Rep2-S1_S8_peakcall_MACS2_rendition_1E-8_downsampled_try3_peak_773	911	13.0147	91.1536	86.5201	167
chr1	90181551	90181765	Project004-IPSHOCH-Exp5-ChIP-NPC-CTCF-IP-Blobel-Rep2-S1_S8_peakcall_MACS2_rendition_1E-8_downsampled_try3_peak_774	505	18.101	50.5419	46.959	106
chr1	90184176	90184568	Project004-IPSHOCH-Exp5-ChIP-NPC-CTCF-IP-Blobel-Rep2-S1_S8_peakcall_MACS2_rendition_1E-8_downsampled_try3_peak_775	686	17.7966	68.6187	64.5844	200
chr1	90186558	90186749	Project004-IPSHOCH-Exp5-ChIP-NPC-CTCF-IP-Blobel-Rep2-S1_S8_peakcall_MACS2_rendition_1E-8_downsampled_try3_peak_776	310	8.7037	31.0396	27.8827	113
chr1	90215206	90215399	Project004-IPSHOCH-Exp5-ChIP-NPC-CTCF-IP-Blobel-Rep2-S1_S8_peakcall_MACS2_rendition_1E-8_downsampled_try3_peak_777	385	17.9864	38.5762	35.2632	84
chr1	90254115	90254291	Project004-IPSHOCH-Exp5-ChIP-NPC-CTCF-IP-Blobel-Rep2-S1_S8_peakcall_MACS2_rendition_1E-8_downsampled_try3_peak_778	614	21.4865	61.4404	57.5919	88
chr1	90321246	90321537	Project004-IPSHOCH-Exp5-ChIP-NPC-CTCF-IP-Blobel-Rep2-S1_S8_peakcall_MACS2_rendition_1E-8_downsampled_try3_peak_779	593	13.3333	59.3423	55.5482	137
chr1	90330754	90330877	Project004-IPSHOCH-Exp5-ChIP-NPC-CTCF-IP-Blobel-Rep2-S1_S8_peakcall_MACS2_rendition_1E-8_downsampled_try3_peak_780	179	8.91892	17.9999	15.1172	71
chr1	90342085	90342254	Project004-IPSHOCH-Exp5-ChIP-NPC-CTCF-IP-Blobel-Rep2-S1_S8_peakcall_MACS2_rendition_1E-8_downsampled_try3_peak_781	243	12.6923	24.3186	21.2979	76
chr1	90353285	90353565	Project004-IPSHOCH-Exp5-ChIP-NPC-CTCF-IP-Blobel-Rep2-S1_S8_peakcall_MACS2_rendition_1E-8_downsampled_try3_peak_782	614	21.4865	61.4404	57.5919	166
chr1	90362362	90362532	Project004-IPSHOCH-Exp5-ChIP-NPC-CTCF-IP-Blobel-Rep2-S1_S8_peakcall_MACS2_rendition_1E-8_downsampled_try3_peak_783	267	11.7568	26.7382	23.6677	89
chr1	90458997	90459202	Project004-IPSHOCH-Exp5-ChIP-NPC-CTCF-IP-Blobel-Rep2-S1_S8_peakcall_MACS2_rendition_1E-8_downsampled_try3_peak_784	374	11.6949	37.4879	34.1992	103
chr1	90601836	90602093	Project004-IPSHOCH-Exp5-ChIP-NPC-CTCF-IP-Blobel-Rep2-S1_S8_peakcall_MACS2_rendition_1E-8_downsampled_try3_peak_785	354	16.5581	35.4812	32.2299	85
chr1	90602406	90602709	Project004-IPSHOCH-Exp5-ChIP-NPC-CTCF-IP-Blobel-Rep2-S1_S8_peakcall_MACS2_rendition_1E-8_downsampled_try3_peak_786	604	16.2712	60.4462	56.6261	205
chr1	90639109	90639313	Project004-IPSHOCH-Exp5-ChIP-NPC-CTCF-IP-Blobel-Rep2-S1_S8_peakcall_MACS2_rendition_1E-8_downsampled_try3_peak_787	305	15.0853	30.5622	27.4146	82
chr1	90641798	90642078	Project004-IPSHOCH-Exp5-ChIP-NPC-CTCF-IP-Blobel-Rep2-S1_S8_peakcall_MACS2_rendition_1E-8_downsampled_try3_peak_788	538	15	53.8199	50.1519	167
chr1	90648904	90649127	Project004-IPSHOCH-Exp5-ChIP-NPC-CTCF-IP-Blobel-Rep2-S1_S8_peakcall_MACS2_rendition_1E-8_downsampled_try3_peak_789	319	15.5769	31.9808	28.8083	111
chr1	90653291	90653457	Project004-IPSHOCH-Exp5-ChIP-NPC-CTCF-IP-Blobel-Rep2-S1_S8_peakcall_MACS2_rendition_1E-8_downsampled_try3_peak_790	242	9.6875	24.2245	21.2098	70
chr1	91088166	91088427	Project004-IPSHOCH-Exp5-ChIP-NPC-CTCF-IP-Blobel-Rep2-S1_S8_peakcall_MACS2_rendition_1E-8_downsampled_try3_peak_791	268	8.57143	26.8926	23.8212	73
chr1	91092767	91092955	Project004-IPSHOCH-Exp5-ChIP-NPC-CTCF-IP-Blobel-Rep2-S1_S8_peakcall_MACS2_rendition_1E-8_downsampled_try3_peak_792	517	21.5563	51.7433	48.1389	97
chr1	91103960	91104160	Project004-IPSHOCH-Exp5-ChIP-NPC-CTCF-IP-Blobel-Rep2-S1_S8_peakcall_MACS2_rendition_1E-8_downsampled_try3_peak_793	196	7.62712	19.6337	16.7192	107
chr1	91131851	91132197	Project004-IPSHOCH-Exp5-ChIP-NPC-CTCF-IP-Blobel-Rep2-S1_S8_peakcall_MACS2_rendition_1E-8_downsampled_try3_peak_794	599	23.592	59.9943	56.1804	164
chr1	91219760	91219930	Project004-IPSHOCH-Exp5-ChIP-NPC-CTCF-IP-Blobel-Rep2-S1_S8_peakcall_MACS2_rendition_1E-8_downsampled_try3_peak_795	126	5.35714	12.6107	9.86015	75
chr1	91239505	91239668	Project004-IPSHOCH-Exp5-ChIP-NPC-CTCF-IP-Blobel-Rep2-S1_S8_peakcall_MACS2_rendition_1E-8_downsampled_try3_peak_796	259	13.3447	25.9459	22.8918	84
chr1	91421069	91421386	Project004-IPSHOCH-Exp5-ChIP-NPC-CTCF-IP-Blobel-Rep2-S1_S8_peakcall_MACS2_rendition_1E-8_downsampled_try3_peak_797	308	7.23684	30.8408	27.6851	99
chr1	91422534	91422770	Project004-IPSHOCH-Exp5-ChIP-NPC-CTCF-IP-Blobel-Rep2-S1_S8_peakcall_MACS2_rendition_1E-8_downsampled_try3_peak_798	376	15	37.6044	34.309	95
chr1	91477945	91478114	Project004-IPSHOCH-Exp5-ChIP-NPC-CTCF-IP-Blobel-Rep2-S1_S8_peakcall_MACS2_rendition_1E-8_downsampled_try3_peak_799	407	17.2877	40.7898	37.4246	73
chr1	91503172	91503450	Project004-IPSHOCH-Exp5-ChIP-NPC-CTCF-IP-Blobel-Rep2-S1_S8_peakcall_MACS2_rendition_1E-8_downsampled_try3_peak_800	665	24.9712	66.5796	62.5976	161
chr1	91524365	91524518	Project004-IPSHOCH-Exp5-ChIP-NPC-CTCF-IP-Blobel-Rep2-S1_S8_peakcall_MACS2_rendition_1E-8_downsampled_try3_peak_801	248	12.6946	24.8328	21.8036	101
chr1	91528441	91528635	Project004-IPSHOCH-Exp5-ChIP-NPC-CTCF-IP-Blobel-Rep2-S1_S8_peakcall_MACS2_rendition_1E-8_downsampled_try3_peak_802	402	13.75	40.2917	36.9391	105
chr1	91540398	91540590	Project004-IPSHOCH-Exp5-ChIP-NPC-CTCF-IP-Blobel-Rep2-S1_S8_peakcall_MACS2_rendition_1E-8_downsampled_try3_peak_803	435	19.727	43.5538	40.1273	98
chr1	91543235	91543570	Project004-IPSHOCH-Exp5-ChIP-NPC-CTCF-IP-Blobel-Rep2-S1_S8_peakcall_MACS2_rendition_1E-8_downsampled_try3_peak_804	865	33.514	86.5889	82.0756	148
chr1	91564115	91564249	Project004-IPSHOCH-Exp5-ChIP-NPC-CTCF-IP-Blobel-Rep2-S1_S8_peakcall_MACS2_rendition_1E-8_downsampled_try3_peak_805	172	9.86348	17.2368	14.3688	59
chr1	91573044	91573197	Project004-IPSHOCH-Exp5-ChIP-NPC-CTCF-IP-Blobel-Rep2-S1_S8_peakcall_MACS2_rendition_1E-8_downsampled_try3_peak_806	274	13.9249	27.4672	24.3835	78
chr1	91654274	91654403	Project004-IPSHOCH-Exp5-ChIP-NPC-CTCF-IP-Blobel-Rep2-S1_S8_peakcall_MACS2_rendition_1E-8_downsampled_try3_peak_807	213	11.5385	21.3832	18.4295	49
chr1	91755920	91756091	Project004-IPSHOCH-Exp5-ChIP-NPC-CTCF-IP-Blobel-Rep2-S1_S8_peakcall_MACS2_rendition_1E-8_downsampled_try3_peak_808	164	7.5	16.4902	13.6432	67
chr1	91839887	91840101	Project004-IPSHOCH-Exp5-ChIP-NPC-CTCF-IP-Blobel-Rep2-S1_S8_peakcall_MACS2_rendition_1E-8_downsampled_try3_peak_809	429	10.7407	42.9282	39.5213	95
chr1	91923595	91923811	Project004-IPSHOCH-Exp5-ChIP-NPC-CTCF-IP-Blobel-Rep2-S1_S8_peakcall_MACS2_rendition_1E-8_downsampled_try3_peak_810	484	21.3462	48.4326	44.9012	108
chr1	91948056	91948240	Project004-IPSHOCH-Exp5-ChIP-NPC-CTCF-IP-Blobel-Rep2-S1_S8_peakcall_MACS2_rendition_1E-8_downsampled_try3_peak_811	435	19.727	43.5538	40.1273	91
chr1	91957213	91957434	Project004-IPSHOCH-Exp5-ChIP-NPC-CTCF-IP-Blobel-Rep2-S1_S8_peakcall_MACS2_rendition_1E-8_downsampled_try3_peak_812	553	20.3995	55.3671	51.6606	103
chr1	92100415	92100603	Project004-IPSHOCH-Exp5-ChIP-NPC-CTCF-IP-Blobel-Rep2-S1_S8_peakcall_MACS2_rendition_1E-8_downsampled_try3_peak_813	418	18.7659	41.8913	38.4983	75
chr1	92101903	92102138	Project004-IPSHOCH-Exp5-ChIP-NPC-CTCF-IP-Blobel-Rep2-S1_S8_peakcall_MACS2_rendition_1E-8_downsampled_try3_peak_814	374	11.6949	37.4879	34.1992	127
chr1	92142225	92142413	Project004-IPSHOCH-Exp5-ChIP-NPC-CTCF-IP-Blobel-Rep2-S1_S8_peakcall_MACS2_rendition_1E-8_downsampled_try3_peak_815	329	15.0587	32.9425	29.747	82
chr1	92187914	92188091	Project004-IPSHOCH-Exp5-ChIP-NPC-CTCF-IP-Blobel-Rep2-S1_S8_peakcall_MACS2_rendition_1E-8_downsampled_try3_peak_816	200	10.1261	20.016	17.0908	111
chr1	92485026	92485263	Project004-IPSHOCH-Exp5-ChIP-NPC-CTCF-IP-Blobel-Rep2-S1_S8_peakcall_MACS2_rendition_1E-8_downsampled_try3_peak_817	636	25.2366	63.6277	59.725	118
chr1	92487518	92487674	Project004-IPSHOCH-Exp5-ChIP-NPC-CTCF-IP-Blobel-Rep2-S1_S8_peakcall_MACS2_rendition_1E-8_downsampled_try3_peak_818	354	16.5581	35.4812	32.2299	92
chr1	92489510	92489740	Project004-IPSHOCH-Exp5-ChIP-NPC-CTCF-IP-Blobel-Rep2-S1_S8_peakcall_MACS2_rendition_1E-8_downsampled_try3_peak_819	914	34.2201	91.459	86.8206	102
chr1	92547294	92547622	Project004-IPSHOCH-Exp5-ChIP-NPC-CTCF-IP-Blobel-Rep2-S1_S8_peakcall_MACS2_rendition_1E-8_downsampled_try3_peak_820	914	34.2201	91.459	86.8206	118
chr1	92736857	92737174	Project004-IPSHOCH-Exp5-ChIP-NPC-CTCF-IP-Blobel-Rep2-S1_S8_peakcall_MACS2_rendition_1E-8_downsampled_try3_peak_821	534	22.082	53.4115	49.7681	195
chr1	92746607	92746756	Project004-IPSHOCH-Exp5-ChIP-NPC-CTCF-IP-Blobel-Rep2-S1_S8_peakcall_MACS2_rendition_1E-8_downsampled_try3_peak_822	275	12.9658	27.5615	24.4764	58
chr1	92802940	92803227	Project004-IPSHOCH-Exp5-ChIP-NPC-CTCF-IP-Blobel-Rep2-S1_S8_peakcall_MACS2_rendition_1E-8_downsampled_try3_peak_823	645	22.2973	64.5809	60.6477	171
chr1	92825167	92825360	Project004-IPSHOCH-Exp5-ChIP-NPC-CTCF-IP-Blobel-Rep2-S1_S8_peakcall_MACS2_rendition_1E-8_downsampled_try3_peak_824	442	14.6875	44.2539	40.8143	98
chr1	92852937	92853084	Project004-IPSHOCH-Exp5-ChIP-NPC-CTCF-IP-Blobel-Rep2-S1_S8_peakcall_MACS2_rendition_1E-8_downsampled_try3_peak_825	205	11.0388	20.5326	17.5936	104
chr1	92853370	92853572	Project004-IPSHOCH-Exp5-ChIP-NPC-CTCF-IP-Blobel-Rep2-S1_S8_peakcall_MACS2_rendition_1E-8_downsampled_try3_peak_826	507	18.6486	50.7125	47.1216	104
chr1	92869885	92870130	Project004-IPSHOCH-Exp5-ChIP-NPC-CTCF-IP-Blobel-Rep2-S1_S8_peakcall_MACS2_rendition_1E-8_downsampled_try3_peak_827	1079	32.8378	107.919	102.903	118
chr1	92934717	92934865	Project004-IPSHOCH-Exp5-ChIP-NPC-CTCF-IP-Blobel-Rep2-S1_S8_peakcall_MACS2_rendition_1E-8_downsampled_try3_peak_828	228	10.5405	22.8938	19.9053	67
chr1	92995603	92995840	Project004-IPSHOCH-Exp5-ChIP-NPC-CTCF-IP-Blobel-Rep2-S1_S8_peakcall_MACS2_rendition_1E-8_downsampled_try3_peak_829	567	23.1335	56.7785	53.0501	119
chr1	93075580	93075896	Project004-IPSHOCH-Exp5-ChIP-NPC-CTCF-IP-Blobel-Rep2-S1_S8_peakcall_MACS2_rendition_1E-8_downsampled_try3_peak_830	619	19.4344	61.9556	58.0954	208
chr1	93107833	93108038	Project004-IPSHOCH-Exp5-ChIP-NPC-CTCF-IP-Blobel-Rep2-S1_S8_peakcall_MACS2_rendition_1E-8_downsampled_try3_peak_831	476	16.0836	47.6516	44.1395	100
chr1	93135791	93135994	Project004-IPSHOCH-Exp5-ChIP-NPC-CTCF-IP-Blobel-Rep2-S1_S8_peakcall_MACS2_rendition_1E-8_downsampled_try3_peak_832	300	9.21428	30.0722	26.9395	104
chr1	93148672	93148814	Project004-IPSHOCH-Exp5-ChIP-NPC-CTCF-IP-Blobel-Rep2-S1_S8_peakcall_MACS2_rendition_1E-8_downsampled_try3_peak_833	228	10.5405	22.8938	19.9053	62
chr1	93243563	93243824	Project004-IPSHOCH-Exp5-ChIP-NPC-CTCF-IP-Blobel-Rep2-S1_S8_peakcall_MACS2_rendition_1E-8_downsampled_try3_peak_834	715	28.8462	71.5302	67.4151	104
chr1	93262838	93263080	Project004-IPSHOCH-Exp5-ChIP-NPC-CTCF-IP-Blobel-Rep2-S1_S8_peakcall_MACS2_rendition_1E-8_downsampled_try3_peak_835	693	23.5135	69.35	65.3014	111
chr1	93277073	93277376	Project004-IPSHOCH-Exp5-ChIP-NPC-CTCF-IP-Blobel-Rep2-S1_S8_peakcall_MACS2_rendition_1E-8_downsampled_try3_peak_836	737	27.6077	73.7139	69.5398	186
chr1	93325242	93325528	Project004-IPSHOCH-Exp5-ChIP-NPC-CTCF-IP-Blobel-Rep2-S1_S8_peakcall_MACS2_rendition_1E-8_downsampled_try3_peak_837	752	30	75.2234	71.0118	146
chr1	93356010	93356147	Project004-IPSHOCH-Exp5-ChIP-NPC-CTCF-IP-Blobel-Rep2-S1_S8_peakcall_MACS2_rendition_1E-8_downsampled_try3_peak_838	128	5.84746	12.8808	10.1276	80
chr1	93379992	93380183	Project004-IPSHOCH-Exp5-ChIP-NPC-CTCF-IP-Blobel-Rep2-S1_S8_peakcall_MACS2_rendition_1E-8_downsampled_try3_peak_839	586	19.0035	58.653	54.8755	96
chr1	93420402	93420625	Project004-IPSHOCH-Exp5-ChIP-NPC-CTCF-IP-Blobel-Rep2-S1_S8_peakcall_MACS2_rendition_1E-8_downsampled_try3_peak_840	390	15.4054	39.0183	35.6872	103
chr1	93470881	93471069	Project004-IPSHOCH-Exp5-ChIP-NPC-CTCF-IP-Blobel-Rep2-S1_S8_peakcall_MACS2_rendition_1E-8_downsampled_try3_peak_841	311	14.7213	31.1164	27.9578	86
chr1	93497337	93497605	Project004-IPSHOCH-Exp5-ChIP-NPC-CTCF-IP-Blobel-Rep2-S1_S8_peakcall_MACS2_rendition_1E-8_downsampled_try3_peak_842	344	10.0714	34.4499	31.2238	145
chr1	93586241	93586409	Project004-IPSHOCH-Exp5-ChIP-NPC-CTCF-IP-Blobel-Rep2-S1_S8_peakcall_MACS2_rendition_1E-8_downsampled_try3_peak_843	213	11.5385	21.3832	18.4295	94
chr1	93651759	93651966	Project004-IPSHOCH-Exp5-ChIP-NPC-CTCF-IP-Blobel-Rep2-S1_S8_peakcall_MACS2_rendition_1E-8_downsampled_try3_peak_844	584	23.6593	58.4766	54.7001	90
chr1	93771317	93771533	Project004-IPSHOCH-Exp5-ChIP-NPC-CTCF-IP-Blobel-Rep2-S1_S8_peakcall_MACS2_rendition_1E-8_downsampled_try3_peak_845	675	27.0449	67.5666	63.5678	99
chr1	93793771	93793894	Project004-IPSHOCH-Exp5-ChIP-NPC-CTCF-IP-Blobel-Rep2-S1_S8_peakcall_MACS2_rendition_1E-8_downsampled_try3_peak_846	172	9.86348	17.2368	14.3688	84
chr1	93810519	93810724	Project004-IPSHOCH-Exp5-ChIP-NPC-CTCF-IP-Blobel-Rep2-S1_S8_peakcall_MACS2_rendition_1E-8_downsampled_try3_peak_847	337	16.2457	33.7226	30.5085	95
chr1	93858917	93859155	Project004-IPSHOCH-Exp5-ChIP-NPC-CTCF-IP-Blobel-Rep2-S1_S8_peakcall_MACS2_rendition_1E-8_downsampled_try3_peak_848	616	24.094	61.6792	57.8238	118
chr1	93865690	93865895	Project004-IPSHOCH-Exp5-ChIP-NPC-CTCF-IP-Blobel-Rep2-S1_S8_peakcall_MACS2_rendition_1E-8_downsampled_try3_peak_849	254	11.3514	25.4413	22.3988	91
chr1	93875153	93875338	Project004-IPSHOCH-Exp5-ChIP-NPC-CTCF-IP-Blobel-Rep2-S1_S8_peakcall_MACS2_rendition_1E-8_downsampled_try3_peak_850	285	13.5529	28.5441	25.4408	103
chr1	94074981	94075198	Project004-IPSHOCH-Exp5-ChIP-NPC-CTCF-IP-Blobel-Rep2-S1_S8_peakcall_MACS2_rendition_1E-8_downsampled_try3_peak_851	477	17.8378	47.7286	44.2084	112
chr1	94256958	94257184	Project004-IPSHOCH-Exp5-ChIP-NPC-CTCF-IP-Blobel-Rep2-S1_S8_peakcall_MACS2_rendition_1E-8_downsampled_try3_peak_852	538	23.2082	53.8399	50.1672	121
chr1	94350406	94350666	Project004-IPSHOCH-Exp5-ChIP-NPC-CTCF-IP-Blobel-Rep2-S1_S8_peakcall_MACS2_rendition_1E-8_downsampled_try3_peak_853	301	11.25	30.1722	27.036	156
chr1	94417940	94418200	Project004-IPSHOCH-Exp5-ChIP-NPC-CTCF-IP-Blobel-Rep2-S1_S8_peakcall_MACS2_rendition_1E-8_downsampled_try3_peak_854	538	23.2082	53.8399	50.1672	121
chr1	94507656	94507959	Project004-IPSHOCH-Exp5-ChIP-NPC-CTCF-IP-Blobel-Rep2-S1_S8_peakcall_MACS2_rendition_1E-8_downsampled_try3_peak_855	520	22.628	52.0971	48.4764	143
chr1	94511238	94511395	Project004-IPSHOCH-Exp5-ChIP-NPC-CTCF-IP-Blobel-Rep2-S1_S8_peakcall_MACS2_rendition_1E-8_downsampled_try3_peak_856	164	7.5	16.4902	13.6432	43
chr1	94544437	94544679	Project004-IPSHOCH-Exp5-ChIP-NPC-CTCF-IP-Blobel-Rep2-S1_S8_peakcall_MACS2_rendition_1E-8_downsampled_try3_peak_857	652	19.375	65.2077	61.2614	120
chr1	94545412	94545665	Project004-IPSHOCH-Exp5-ChIP-NPC-CTCF-IP-Blobel-Rep2-S1_S8_peakcall_MACS2_rendition_1E-8_downsampled_try3_peak_858	290	9	29.0021	25.8891	119
chr1	94593469	94593740	Project004-IPSHOCH-Exp5-ChIP-NPC-CTCF-IP-Blobel-Rep2-S1_S8_peakcall_MACS2_rendition_1E-8_downsampled_try3_peak_859	304	10.1695	30.4589	27.3154	117
chr1	94730664	94730937	Project004-IPSHOCH-Exp5-ChIP-NPC-CTCF-IP-Blobel-Rep2-S1_S8_peakcall_MACS2_rendition_1E-8_downsampled_try3_peak_860	608	18.4375	60.8783	57.0443	103
chr1	94791721	94791978	Project004-IPSHOCH-Exp5-ChIP-NPC-CTCF-IP-Blobel-Rep2-S1_S8_peakcall_MACS2_rendition_1E-8_downsampled_try3_peak_861	666	19.6875	66.6649	62.679	135
chr1	94803448	94803666	Project004-IPSHOCH-Exp5-ChIP-NPC-CTCF-IP-Blobel-Rep2-S1_S8_peakcall_MACS2_rendition_1E-8_downsampled_try3_peak_862	293	12.5676	29.3754	26.2484	117
chr1	94807214	94807408	Project004-IPSHOCH-Exp5-ChIP-NPC-CTCF-IP-Blobel-Rep2-S1_S8_peakcall_MACS2_rendition_1E-8_downsampled_try3_peak_863	751	28.9401	75.1087	70.9052	106
chr1	94853310	94853466	Project004-IPSHOCH-Exp5-ChIP-NPC-CTCF-IP-Blobel-Rep2-S1_S8_peakcall_MACS2_rendition_1E-8_downsampled_try3_peak_864	395	16.57	39.5764	36.2422	69
chr1	94907352	94907538	Project004-IPSHOCH-Exp5-ChIP-NPC-CTCF-IP-Blobel-Rep2-S1_S8_peakcall_MACS2_rendition_1E-8_downsampled_try3_peak_865	416	19.0385	41.6928	38.3138	91
chr1	94911131	94911354	Project004-IPSHOCH-Exp5-ChIP-NPC-CTCF-IP-Blobel-Rep2-S1_S8_peakcall_MACS2_rendition_1E-8_downsampled_try3_peak_866	492	18.2432	49.2158	45.6608	103
chr1	94977644	94977818	Project004-IPSHOCH-Exp5-ChIP-NPC-CTCF-IP-Blobel-Rep2-S1_S8_peakcall_MACS2_rendition_1E-8_downsampled_try3_peak_867	293	12.5676	29.3754	26.2484	74
chr1	95025367	95025608	Project004-IPSHOCH-Exp5-ChIP-NPC-CTCF-IP-Blobel-Rep2-S1_S8_peakcall_MACS2_rendition_1E-8_downsampled_try3_peak_868	614	21.4865	61.4404	57.5919	111
chr1	95071028	95071344	Project004-IPSHOCH-Exp5-ChIP-NPC-CTCF-IP-Blobel-Rep2-S1_S8_peakcall_MACS2_rendition_1E-8_downsampled_try3_peak_869	922	35.1923	92.2354	87.5823	127
chr1	95120646	95120847	Project004-IPSHOCH-Exp5-ChIP-NPC-CTCF-IP-Blobel-Rep2-S1_S8_peakcall_MACS2_rendition_1E-8_downsampled_try3_peak_870	308	14.9023	30.8217	27.6659	112
chr1	95375036	95375229	Project004-IPSHOCH-Exp5-ChIP-NPC-CTCF-IP-Blobel-Rep2-S1_S8_peakcall_MACS2_rendition_1E-8_downsampled_try3_peak_871	227	8.38983	22.7506	19.7726	86
chr1	95403715	95403899	Project004-IPSHOCH-Exp5-ChIP-NPC-CTCF-IP-Blobel-Rep2-S1_S8_peakcall_MACS2_rendition_1E-8_downsampled_try3_peak_872	445	19.9126	44.5521	41.1109	91
chr1	95565309	95565547	Project004-IPSHOCH-Exp5-ChIP-NPC-CTCF-IP-Blobel-Rep2-S1_S8_peakcall_MACS2_rendition_1E-8_downsampled_try3_peak_873	619	24.7108	61.9014	58.0414	144
chr1	95583138	95583291	Project004-IPSHOCH-Exp5-ChIP-NPC-CTCF-IP-Blobel-Rep2-S1_S8_peakcall_MACS2_rendition_1E-8_downsampled_try3_peak_874	242	12.047	24.2877	21.2713	60
chr1	95623649	95623858	Project004-IPSHOCH-Exp5-ChIP-NPC-CTCF-IP-Blobel-Rep2-S1_S8_peakcall_MACS2_rendition_1E-8_downsampled_try3_peak_875	677	23.1081	67.7527	63.7449	101
chr1	95700289	95700540	Project004-IPSHOCH-Exp5-ChIP-NPC-CTCF-IP-Blobel-Rep2-S1_S8_peakcall_MACS2_rendition_1E-8_downsampled_try3_peak_876	933	33.1292	93.3847	88.6978	122
chr1	95794066	95794201	Project004-IPSHOCH-Exp5-ChIP-NPC-CTCF-IP-Blobel-Rep2-S1_S8_peakcall_MACS2_rendition_1E-8_downsampled_try3_peak_877	157	9.23077	15.7752	12.9422	66
chr1	95863187	95863310	Project004-IPSHOCH-Exp5-ChIP-NPC-CTCF-IP-Blobel-Rep2-S1_S8_peakcall_MACS2_rendition_1E-8_downsampled_try3_peak_878	144	8.65385	14.4351	11.6391	56
chr1	95908331	95908467	Project004-IPSHOCH-Exp5-ChIP-NPC-CTCF-IP-Blobel-Rep2-S1_S8_peakcall_MACS2_rendition_1E-8_downsampled_try3_peak_879	213	11.5385	21.3832	18.4295	81
chr1	95931528	95931783	Project004-IPSHOCH-Exp5-ChIP-NPC-CTCF-IP-Blobel-Rep2-S1_S8_peakcall_MACS2_rendition_1E-8_downsampled_try3_peak_880	764	23.9517	76.4418	72.1991	114
chr1	95975685	95976050	Project004-IPSHOCH-Exp5-ChIP-NPC-CTCF-IP-Blobel-Rep2-S1_S8_peakcall_MACS2_rendition_1E-8_downsampled_try3_peak_881	1346	38.9189	134.659	129.162	206
chr1	96036113	96036280	Project004-IPSHOCH-Exp5-ChIP-NPC-CTCF-IP-Blobel-Rep2-S1_S8_peakcall_MACS2_rendition_1E-8_downsampled_try3_peak_882	321	15.6655	32.1345	28.9516	57
chr1	97658925	97659117	Project004-IPSHOCH-Exp5-ChIP-NPC-CTCF-IP-Blobel-Rep2-S1_S8_peakcall_MACS2_rendition_1E-8_downsampled_try3_peak_883	400	18.4615	40.0393	36.6973	95
chr1	98698329	98698514	Project004-IPSHOCH-Exp5-ChIP-NPC-CTCF-IP-Blobel-Rep2-S1_S8_peakcall_MACS2_rendition_1E-8_downsampled_try3_peak_884	199	10.9615	19.9467	17.0228	65
chr1	98743367	98743585	Project004-IPSHOCH-Exp5-ChIP-NPC-CTCF-IP-Blobel-Rep2-S1_S8_peakcall_MACS2_rendition_1E-8_downsampled_try3_peak_885	334	13.7838	33.4333	30.2288	98
chr1	98915657	98915870	Project004-IPSHOCH-Exp5-ChIP-NPC-CTCF-IP-Blobel-Rep2-S1_S8_peakcall_MACS2_rendition_1E-8_downsampled_try3_peak_886	533	21.5842	53.3484	49.7083	96
chr1	98935246	98935378	Project004-IPSHOCH-Exp5-ChIP-NPC-CTCF-IP-Blobel-Rep2-S1_S8_peakcall_MACS2_rendition_1E-8_downsampled_try3_peak_887	164	7.5	16.4902	13.6432	89
chr1	99585434	99585683	Project004-IPSHOCH-Exp5-ChIP-NPC-CTCF-IP-Blobel-Rep2-S1_S8_peakcall_MACS2_rendition_1E-8_downsampled_try3_peak_888	248	8.8983	24.8937	21.8632	99
chr1	99699233	99699383	Project004-IPSHOCH-Exp5-ChIP-NPC-CTCF-IP-Blobel-Rep2-S1_S8_peakcall_MACS2_rendition_1E-8_downsampled_try3_peak_889	179	8.91892	17.9999	15.1172	104
chr1	99873512	99873768	Project004-IPSHOCH-Exp5-ChIP-NPC-CTCF-IP-Blobel-Rep2-S1_S8_peakcall_MACS2_rendition_1E-8_downsampled_try3_peak_890	336	16.1792	33.607	30.3981	94
chr1	99968796	99968946	Project004-IPSHOCH-Exp5-ChIP-NPC-CTCF-IP-Blobel-Rep2-S1_S8_peakcall_MACS2_rendition_1E-8_downsampled_try3_peak_891	123	6.89189	12.3237	9.58027	48
chr1	100075706	100076031	Project004-IPSHOCH-Exp5-ChIP-NPC-CTCF-IP-Blobel-Rep2-S1_S8_peakcall_MACS2_rendition_1E-8_downsampled_try3_peak_892	587	24.2852	58.7535	54.9728	125
chr1	100246949	100247178	Project004-IPSHOCH-Exp5-ChIP-NPC-CTCF-IP-Blobel-Rep2-S1_S8_peakcall_MACS2_rendition_1E-8_downsampled_try3_peak_893	123	6.89189	12.3237	9.58027	117
chr1	105695988	105696137	Project004-IPSHOCH-Exp5-ChIP-NPC-CTCF-IP-Blobel-Rep2-S1_S8_peakcall_MACS2_rendition_1E-8_downsampled_try3_peak_894	191	9.32432	19.1965	16.2856	96
chr1	105883562	105883695	Project004-IPSHOCH-Exp5-ChIP-NPC-CTCF-IP-Blobel-Rep2-S1_S8_peakcall_MACS2_rendition_1E-8_downsampled_try3_peak_895	229	12.1843	22.9595	19.9656	70
chr1	106506112	106506269	Project004-IPSHOCH-Exp5-ChIP-NPC-CTCF-IP-Blobel-Rep2-S1_S8_peakcall_MACS2_rendition_1E-8_downsampled_try3_peak_896	214	11.6041	21.496	18.5379	85
chr1	106841409	106841735	Project004-IPSHOCH-Exp5-ChIP-NPC-CTCF-IP-Blobel-Rep2-S1_S8_peakcall_MACS2_rendition_1E-8_downsampled_try3_peak_897	451	19.4532	45.1774	41.7168	106
chr1	106882807	106883110	Project004-IPSHOCH-Exp5-ChIP-NPC-CTCF-IP-Blobel-Rep2-S1_S8_peakcall_MACS2_rendition_1E-8_downsampled_try3_peak_898	733	29.4231	73.3726	69.2094	170
chr1	106989206	106989341	Project004-IPSHOCH-Exp5-ChIP-NPC-CTCF-IP-Blobel-Rep2-S1_S8_peakcall_MACS2_rendition_1E-8_downsampled_try3_peak_899	206	7.88136	20.6591	17.718	69
chr1	107527116	107527411	Project004-IPSHOCH-Exp5-ChIP-NPC-CTCF-IP-Blobel-Rep2-S1_S8_peakcall_MACS2_rendition_1E-8_downsampled_try3_peak_900	447	17.027	44.7837	41.3346	193
chr1	107556696	107556884	Project004-IPSHOCH-Exp5-ChIP-NPC-CTCF-IP-Blobel-Rep2-S1_S8_peakcall_MACS2_rendition_1E-8_downsampled_try3_peak_901	481	21.1591	48.1067	44.5856	117
chr1	107577295	107577475	Project004-IPSHOCH-Exp5-ChIP-NPC-CTCF-IP-Blobel-Rep2-S1_S8_peakcall_MACS2_rendition_1E-8_downsampled_try3_peak_902	386	17.662	38.6596	35.3447	86
chr1	107607911	107608119	Project004-IPSHOCH-Exp5-ChIP-NPC-CTCF-IP-Blobel-Rep2-S1_S8_peakcall_MACS2_rendition_1E-8_downsampled_try3_peak_903	197	8.4375	19.7116	16.7929	98
chr1	107777702	107777838	Project004-IPSHOCH-Exp5-ChIP-NPC-CTCF-IP-Blobel-Rep2-S1_S8_peakcall_MACS2_rendition_1E-8_downsampled_try3_peak_904	157	9.23077	15.7752	12.9422	48
chr1	107787717	107787908	Project004-IPSHOCH-Exp5-ChIP-NPC-CTCF-IP-Blobel-Rep2-S1_S8_peakcall_MACS2_rendition_1E-8_downsampled_try3_peak_905	584	23.6593	58.4766	54.7001	87
chr1	107933653	107933852	Project004-IPSHOCH-Exp5-ChIP-NPC-CTCF-IP-Blobel-Rep2-S1_S8_peakcall_MACS2_rendition_1E-8_downsampled_try3_peak_906	460	12.2143	46.0084	42.5327	84
chr1	107967858	107968180	Project004-IPSHOCH-Exp5-ChIP-NPC-CTCF-IP-Blobel-Rep2-S1_S8_peakcall_MACS2_rendition_1E-8_downsampled_try3_peak_907	594	18.125	59.4496	55.6513	148
chr1	108067779	108068008	Project004-IPSHOCH-Exp5-ChIP-NPC-CTCF-IP-Blobel-Rep2-S1_S8_peakcall_MACS2_rendition_1E-8_downsampled_try3_peak_908	473	13.7288	47.376	43.8651	110
chr1	108243479	108243620	Project004-IPSHOCH-Exp5-ChIP-NPC-CTCF-IP-Blobel-Rep2-S1_S8_peakcall_MACS2_rendition_1E-8_downsampled_try3_peak_909	294	14.4222	29.4217	26.2946	39
chr1	108286388	108286643	Project004-IPSHOCH-Exp5-ChIP-NPC-CTCF-IP-Blobel-Rep2-S1_S8_peakcall_MACS2_rendition_1E-8_downsampled_try3_peak_910	553	23.6538	55.3579	51.6521	147
chr1	108292157	108292412	Project004-IPSHOCH-Exp5-ChIP-NPC-CTCF-IP-Blobel-Rep2-S1_S8_peakcall_MACS2_rendition_1E-8_downsampled_try3_peak_911	733	29.4231	73.3726	69.2094	136
chr1	108321762	108322333	Project004-IPSHOCH-Exp5-ChIP-NPC-CTCF-IP-Blobel-Rep2-S1_S8_peakcall_MACS2_rendition_1E-8_downsampled_try3_peak_912	492	18.2432	49.2158	45.6608	159
chr1	108408218	108408478	Project004-IPSHOCH-Exp5-ChIP-NPC-CTCF-IP-Blobel-Rep2-S1_S8_peakcall_MACS2_rendition_1E-8_downsampled_try3_peak_913	849	31.5457	84.993	80.5157	110
chr1	108439387	108439608	Project004-IPSHOCH-Exp5-ChIP-NPC-CTCF-IP-Blobel-Rep2-S1_S8_peakcall_MACS2_rendition_1E-8_downsampled_try3_peak_914	351	16.7308	35.1605	31.9158	123
chr1	108441517	108441673	Project004-IPSHOCH-Exp5-ChIP-NPC-CTCF-IP-Blobel-Rep2-S1_S8_peakcall_MACS2_rendition_1E-8_downsampled_try3_peak_915	337	14.7289	33.7009	30.4908	75
chr1	108525416	108525550	Project004-IPSHOCH-Exp5-ChIP-NPC-CTCF-IP-Blobel-Rep2-S1_S8_peakcall_MACS2_rendition_1E-8_downsampled_try3_peak_916	179	8.91892	17.9999	15.1172	67
chr1	108609025	108609148	Project004-IPSHOCH-Exp5-ChIP-NPC-CTCF-IP-Blobel-Rep2-S1_S8_peakcall_MACS2_rendition_1E-8_downsampled_try3_peak_917	154	7.1875	15.4506	12.6326	64
chr1	108613896	108614134	Project004-IPSHOCH-Exp5-ChIP-NPC-CTCF-IP-Blobel-Rep2-S1_S8_peakcall_MACS2_rendition_1E-8_downsampled_try3_peak_918	517	22.4184	51.7309	48.1287	98
chr1	108632267	108632497	Project004-IPSHOCH-Exp5-ChIP-NPC-CTCF-IP-Blobel-Rep2-S1_S8_peakcall_MACS2_rendition_1E-8_downsampled_try3_peak_919	429	14.375	42.9238	39.517	121
chr1	108634737	108634906	Project004-IPSHOCH-Exp5-ChIP-NPC-CTCF-IP-Blobel-Rep2-S1_S8_peakcall_MACS2_rendition_1E-8_downsampled_try3_peak_920	248	12.6946	24.8328	21.8036	101
chr1	108696636	108696766	Project004-IPSHOCH-Exp5-ChIP-NPC-CTCF-IP-Blobel-Rep2-S1_S8_peakcall_MACS2_rendition_1E-8_downsampled_try3_peak_921	244	12.7645	24.4431	21.4178	59
chr1	108715055	108715230	Project004-IPSHOCH-Exp5-ChIP-NPC-CTCF-IP-Blobel-Rep2-S1_S8_peakcall_MACS2_rendition_1E-8_downsampled_try3_peak_922	301	11.25	30.1722	27.036	93
chr1	108780447	108780732	Project004-IPSHOCH-Exp5-ChIP-NPC-CTCF-IP-Blobel-Rep2-S1_S8_peakcall_MACS2_rendition_1E-8_downsampled_try3_peak_923	141	5.37037	14.1288	11.3441	165
chr1	108798092	108798361	Project004-IPSHOCH-Exp5-ChIP-NPC-CTCF-IP-Blobel-Rep2-S1_S8_peakcall_MACS2_rendition_1E-8_downsampled_try3_peak_924	566	21.6331	56.6611	52.9359	155
chr1	108911186	108911357	Project004-IPSHOCH-Exp5-ChIP-NPC-CTCF-IP-Blobel-Rep2-S1_S8_peakcall_MACS2_rendition_1E-8_downsampled_try3_peak_925	402	18.2139	40.2689	36.92	83
chr1	109024092	109024297	Project004-IPSHOCH-Exp5-ChIP-NPC-CTCF-IP-Blobel-Rep2-S1_S8_peakcall_MACS2_rendition_1E-8_downsampled_try3_peak_926	553	23.6538	55.3579	51.6521	105
chr1	109139871	109140132	Project004-IPSHOCH-Exp5-ChIP-NPC-CTCF-IP-Blobel-Rep2-S1_S8_peakcall_MACS2_rendition_1E-8_downsampled_try3_peak_927	606	25.3846	60.6627	56.8336	104
chr1	109249766	109249893	Project004-IPSHOCH-Exp5-ChIP-NPC-CTCF-IP-Blobel-Rep2-S1_S8_peakcall_MACS2_rendition_1E-8_downsampled_try3_peak_928	185	10.3846	18.5323	15.6407	69
chr1	109378169	109378380	Project004-IPSHOCH-Exp5-ChIP-NPC-CTCF-IP-Blobel-Rep2-S1_S8_peakcall_MACS2_rendition_1E-8_downsampled_try3_peak_929	524	16.5625	52.4199	48.7864	117
chr1	109462333	109462492	Project004-IPSHOCH-Exp5-ChIP-NPC-CTCF-IP-Blobel-Rep2-S1_S8_peakcall_MACS2_rendition_1E-8_downsampled_try3_peak_930	274	13.9249	27.4672	24.3835	69
chr1	109495169	109495400	Project004-IPSHOCH-Exp5-ChIP-NPC-CTCF-IP-Blobel-Rep2-S1_S8_peakcall_MACS2_rendition_1E-8_downsampled_try3_peak_931	520	22.628	52.0971	48.4764	87
chr1	109532597	109532799	Project004-IPSHOCH-Exp5-ChIP-NPC-CTCF-IP-Blobel-Rep2-S1_S8_peakcall_MACS2_rendition_1E-8_downsampled_try3_peak_932	273	13.8461	27.331	24.2518	99
chr1	110723966	110724089	Project004-IPSHOCH-Exp5-ChIP-NPC-CTCF-IP-Blobel-Rep2-S1_S8_peakcall_MACS2_rendition_1E-8_downsampled_try3_peak_933	186	10.4437	18.6335	15.7332	72
chr1	113139026	113139189	Project004-IPSHOCH-Exp5-ChIP-NPC-CTCF-IP-Blobel-Rep2-S1_S8_peakcall_MACS2_rendition_1E-8_downsampled_try3_peak_934	321	15.6655	32.1345	28.9516	94
chr1	113530778	113530999	Project004-IPSHOCH-Exp5-ChIP-NPC-CTCF-IP-Blobel-Rep2-S1_S8_peakcall_MACS2_rendition_1E-8_downsampled_try3_peak_935	348	14.1892	34.8116	31.5773	114
chr1	113556951	113557170	Project004-IPSHOCH-Exp5-ChIP-NPC-CTCF-IP-Blobel-Rep2-S1_S8_peakcall_MACS2_rendition_1E-8_downsampled_try3_peak_936	281	9.66102	28.1988	25.0979	99
chr1	113739452	113739599	Project004-IPSHOCH-Exp5-ChIP-NPC-CTCF-IP-Blobel-Rep2-S1_S8_peakcall_MACS2_rendition_1E-8_downsampled_try3_peak_937	186	10.4437	18.6335	15.7332	79
chr1	113760589	113760793	Project004-IPSHOCH-Exp5-ChIP-NPC-CTCF-IP-Blobel-Rep2-S1_S8_peakcall_MACS2_rendition_1E-8_downsampled_try3_peak_938	483	17.7627	48.3745	44.8486	100
chr1	114275350	114275590	Project004-IPSHOCH-Exp5-ChIP-NPC-CTCF-IP-Blobel-Rep2-S1_S8_peakcall_MACS2_rendition_1E-8_downsampled_try3_peak_939	522	19.0541	52.2186	48.5899	103
chr1	114276599	114276793	Project004-IPSHOCH-Exp5-ChIP-NPC-CTCF-IP-Blobel-Rep2-S1_S8_peakcall_MACS2_rendition_1E-8_downsampled_try3_peak_940	436	18.5724	43.684	40.2518	105
chr1	114285407	114285751	Project004-IPSHOCH-Exp5-ChIP-NPC-CTCF-IP-Blobel-Rep2-S1_S8_peakcall_MACS2_rendition_1E-8_downsampled_try3_peak_941	773	30.7508	77.3881	73.1165	150
chr1	114348338	114348507	Project004-IPSHOCH-Exp5-ChIP-NPC-CTCF-IP-Blobel-Rep2-S1_S8_peakcall_MACS2_rendition_1E-8_downsampled_try3_peak_942	348	14.1892	34.8116	31.5773	97
chr1	114349060	114349251	Project004-IPSHOCH-Exp5-ChIP-NPC-CTCF-IP-Blobel-Rep2-S1_S8_peakcall_MACS2_rendition_1E-8_downsampled_try3_peak_943	196	10.5152	19.6547	16.7388	105
chr1	114352688	114352926	Project004-IPSHOCH-Exp5-ChIP-NPC-CTCF-IP-Blobel-Rep2-S1_S8_peakcall_MACS2_rendition_1E-8_downsampled_try3_peak_944	550	22.6078	55.09	51.407	125
chr1	115144054	115144177	Project004-IPSHOCH-Exp5-ChIP-NPC-CTCF-IP-Blobel-Rep2-S1_S8_peakcall_MACS2_rendition_1E-8_downsampled_try3_peak_945	210	11.041	21.0226	18.0755	72
chr1	118209927	118210091	Project004-IPSHOCH-Exp5-ChIP-NPC-CTCF-IP-Blobel-Rep2-S1_S8_peakcall_MACS2_rendition_1E-8_downsampled_try3_peak_946	265	10.3125	26.5652	23.5028	84
chr1	118374392	118374559	Project004-IPSHOCH-Exp5-ChIP-NPC-CTCF-IP-Blobel-Rep2-S1_S8_peakcall_MACS2_rendition_1E-8_downsampled_try3_peak_947	254	11.3514	25.4413	22.3988	97
chr1	119416167	119416381	Project004-IPSHOCH-Exp5-ChIP-NPC-CTCF-IP-Blobel-Rep2-S1_S8_peakcall_MACS2_rendition_1E-8_downsampled_try3_peak_948	321	15.6655	32.1345	28.9516	102
chr1	120171821	120172027	Project004-IPSHOCH-Exp5-ChIP-NPC-CTCF-IP-Blobel-Rep2-S1_S8_peakcall_MACS2_rendition_1E-8_downsampled_try3_peak_949	305	15.0853	30.5622	27.4146	113
chr1	120217399	120217582	Project004-IPSHOCH-Exp5-ChIP-NPC-CTCF-IP-Blobel-Rep2-S1_S8_peakcall_MACS2_rendition_1E-8_downsampled_try3_peak_950	390	17.0666	39.0042	35.6799	90
chr1	120218208	120218450	Project004-IPSHOCH-Exp5-ChIP-NPC-CTCF-IP-Blobel-Rep2-S1_S8_peakcall_MACS2_rendition_1E-8_downsampled_try3_peak_951	988	34.6351	98.8927	94.0735	122
chr1	120232544	120232679	Project004-IPSHOCH-Exp5-ChIP-NPC-CTCF-IP-Blobel-Rep2-S1_S8_peakcall_MACS2_rendition_1E-8_downsampled_try3_peak_952	229	12.1843	22.9595	19.9656	65
chr1	120264637	120264760	Project004-IPSHOCH-Exp5-ChIP-NPC-CTCF-IP-Blobel-Rep2-S1_S8_peakcall_MACS2_rendition_1E-8_downsampled_try3_peak_953	105	5.625	10.5451	7.86164	55
chr1	120355525	120355718	Project004-IPSHOCH-Exp5-ChIP-NPC-CTCF-IP-Blobel-Rep2-S1_S8_peakcall_MACS2_rendition_1E-8_downsampled_try3_peak_954	248	12.6946	24.8328	21.8036	73
chr1	120362763	120362886	Project004-IPSHOCH-Exp5-ChIP-NPC-CTCF-IP-Blobel-Rep2-S1_S8_peakcall_MACS2_rendition_1E-8_downsampled_try3_peak_955	157	9.23077	15.7752	12.9422	62
chr1	120373571	120373768	Project004-IPSHOCH-Exp5-ChIP-NPC-CTCF-IP-Blobel-Rep2-S1_S8_peakcall_MACS2_rendition_1E-8_downsampled_try3_peak_956	341	15.7729	34.1464	30.9231	95
chr1	120394983	120395204	Project004-IPSHOCH-Exp5-ChIP-NPC-CTCF-IP-Blobel-Rep2-S1_S8_peakcall_MACS2_rendition_1E-8_downsampled_try3_peak_957	619	24.7108	61.9014	58.0414	102
chr1	120656242	120656459	Project004-IPSHOCH-Exp5-ChIP-NPC-CTCF-IP-Blobel-Rep2-S1_S8_peakcall_MACS2_rendition_1E-8_downsampled_try3_peak_958	447	17.027	44.7837	41.3346	112
chr1	120665452	120665691	Project004-IPSHOCH-Exp5-ChIP-NPC-CTCF-IP-Blobel-Rep2-S1_S8_peakcall_MACS2_rendition_1E-8_downsampled_try3_peak_959	467	20.7692	46.7295	43.238	122
chr1	120668985	120669195	Project004-IPSHOCH-Exp5-ChIP-NPC-CTCF-IP-Blobel-Rep2-S1_S8_peakcall_MACS2_rendition_1E-8_downsampled_try3_peak_960	362	14.5946	36.202	32.9388	87
chr1	120718895	120719111	Project004-IPSHOCH-Exp5-ChIP-NPC-CTCF-IP-Blobel-Rep2-S1_S8_peakcall_MACS2_rendition_1E-8_downsampled_try3_peak_961	118	7.5	11.8406	9.11495	129
chr1	120950175	120950421	Project004-IPSHOCH-Exp5-ChIP-NPC-CTCF-IP-Blobel-Rep2-S1_S8_peakcall_MACS2_rendition_1E-8_downsampled_try3_peak_962	538	15	53.8199	50.1519	124
chr1	120979186	120979567	Project004-IPSHOCH-Exp5-ChIP-NPC-CTCF-IP-Blobel-Rep2-S1_S8_peakcall_MACS2_rendition_1E-8_downsampled_try3_peak_963	156	8.10811	15.6651	12.8402	147
chr1	120980293	120980548	Project004-IPSHOCH-Exp5-ChIP-NPC-CTCF-IP-Blobel-Rep2-S1_S8_peakcall_MACS2_rendition_1E-8_downsampled_try3_peak_964	389	13.4375	38.9902	35.6672	153
chr1	120984184	120984396	Project004-IPSHOCH-Exp5-ChIP-NPC-CTCF-IP-Blobel-Rep2-S1_S8_peakcall_MACS2_rendition_1E-8_downsampled_try3_peak_965	534	22.082	53.4115	49.7681	107
chr1	120990364	120990647	Project004-IPSHOCH-Exp5-ChIP-NPC-CTCF-IP-Blobel-Rep2-S1_S8_peakcall_MACS2_rendition_1E-8_downsampled_try3_peak_966	564	15.5085	56.4493	52.7335	106
chr1	121016619	121016779	Project004-IPSHOCH-Exp5-ChIP-NPC-CTCF-IP-Blobel-Rep2-S1_S8_peakcall_MACS2_rendition_1E-8_downsampled_try3_peak_967	171	9.80769	17.1414	14.2785	93
chr1	121152751	121153018	Project004-IPSHOCH-Exp5-ChIP-NPC-CTCF-IP-Blobel-Rep2-S1_S8_peakcall_MACS2_rendition_1E-8_downsampled_try3_peak_968	295	12.6883	29.5827	26.4546	97
chr1	121242047	121242237	Project004-IPSHOCH-Exp5-ChIP-NPC-CTCF-IP-Blobel-Rep2-S1_S8_peakcall_MACS2_rendition_1E-8_downsampled_try3_peak_969	241	10.9459	24.1597	21.1477	98
chr1	121319339	121319495	Project004-IPSHOCH-Exp5-ChIP-NPC-CTCF-IP-Blobel-Rep2-S1_S8_peakcall_MACS2_rendition_1E-8_downsampled_try3_peak_970	208	8.75	20.8176	17.8726	92
chr1	121320230	121320458	Project004-IPSHOCH-Exp5-ChIP-NPC-CTCF-IP-Blobel-Rep2-S1_S8_peakcall_MACS2_rendition_1E-8_downsampled_try3_peak_971	900	34.4899	90.0949	85.4969	107
chr1	121354826	121355172	Project004-IPSHOCH-Exp5-ChIP-NPC-CTCF-IP-Blobel-Rep2-S1_S8_peakcall_MACS2_rendition_1E-8_downsampled_try3_peak_972	627	26.1092	62.7096	58.8287	169
chr1	121360077	121360255	Project004-IPSHOCH-Exp5-ChIP-NPC-CTCF-IP-Blobel-Rep2-S1_S8_peakcall_MACS2_rendition_1E-8_downsampled_try3_peak_973	390	15.4054	39.0183	35.6872	68
chr1	121378269	121378427	Project004-IPSHOCH-Exp5-ChIP-NPC-CTCF-IP-Blobel-Rep2-S1_S8_peakcall_MACS2_rendition_1E-8_downsampled_try3_peak_974	145	7.7027	14.5288	11.7208	68
chr1	121381128	121381330	Project004-IPSHOCH-Exp5-ChIP-NPC-CTCF-IP-Blobel-Rep2-S1_S8_peakcall_MACS2_rendition_1E-8_downsampled_try3_peak_975	338	12.1875	33.886	30.6682	116
chr1	121445349	121445536	Project004-IPSHOCH-Exp5-ChIP-NPC-CTCF-IP-Blobel-Rep2-S1_S8_peakcall_MACS2_rendition_1E-8_downsampled_try3_peak_976	537	19.4595	53.7338	50.0722	89
chr1	121539019	121539242	Project004-IPSHOCH-Exp5-ChIP-NPC-CTCF-IP-Blobel-Rep2-S1_S8_peakcall_MACS2_rendition_1E-8_downsampled_try3_peak_977	460	20.377	46.0479	42.5721	114
chr1	121571651	121571891	Project004-IPSHOCH-Exp5-ChIP-NPC-CTCF-IP-Blobel-Rep2-S1_S8_peakcall_MACS2_rendition_1E-8_downsampled_try3_peak_978	555	23.7884	55.5934	51.8816	139
chr1	121715366	121715539	Project004-IPSHOCH-Exp5-ChIP-NPC-CTCF-IP-Blobel-Rep2-S1_S8_peakcall_MACS2_rendition_1E-8_downsampled_try3_peak_979	280	12.1622	28.0497	24.9519	91
chr1	121791683	121791904	Project004-IPSHOCH-Exp5-ChIP-NPC-CTCF-IP-Blobel-Rep2-S1_S8_peakcall_MACS2_rendition_1E-8_downsampled_try3_peak_980	447	17.027	44.7837	41.3346	106
chr1	121826460	121826616	Project004-IPSHOCH-Exp5-ChIP-NPC-CTCF-IP-Blobel-Rep2-S1_S8_peakcall_MACS2_rendition_1E-8_downsampled_try3_peak_981	348	14.1892	34.8116	31.5773	74
chr1	121894326	121894505	Project004-IPSHOCH-Exp5-ChIP-NPC-CTCF-IP-Blobel-Rep2-S1_S8_peakcall_MACS2_rendition_1E-8_downsampled_try3_peak_982	216	10.1351	21.6442	18.6794	90
chr1	121909791	121909988	Project004-IPSHOCH-Exp5-ChIP-NPC-CTCF-IP-Blobel-Rep2-S1_S8_peakcall_MACS2_rendition_1E-8_downsampled_try3_peak_983	549	22.0861	54.9955	51.3157	119
chr1	121912922	121913079	Project004-IPSHOCH-Exp5-ChIP-NPC-CTCF-IP-Blobel-Rep2-S1_S8_peakcall_MACS2_rendition_1E-8_downsampled_try3_peak_984	267	11.7568	26.7382	23.6677	44
chr1	121929667	121929883	Project004-IPSHOCH-Exp5-ChIP-NPC-CTCF-IP-Blobel-Rep2-S1_S8_peakcall_MACS2_rendition_1E-8_downsampled_try3_peak_985	630	21.8919	63.0066	59.1167	89
chr1	121990077	121990424	Project004-IPSHOCH-Exp5-ChIP-NPC-CTCF-IP-Blobel-Rep2-S1_S8_peakcall_MACS2_rendition_1E-8_downsampled_try3_peak_986	755	21.5625	75.5477	71.3238	220
chr1	121995020	121995253	Project004-IPSHOCH-Exp5-ChIP-NPC-CTCF-IP-Blobel-Rep2-S1_S8_peakcall_MACS2_rendition_1E-8_downsampled_try3_peak_987	351	16.7308	35.1605	31.9158	82
chr1	122043715	122043875	Project004-IPSHOCH-Exp5-ChIP-NPC-CTCF-IP-Blobel-Rep2-S1_S8_peakcall_MACS2_rendition_1E-8_downsampled_try3_peak_988	171	9.80769	17.1414	14.2785	82
chr1	122050876	122051088	Project004-IPSHOCH-Exp5-ChIP-NPC-CTCF-IP-Blobel-Rep2-S1_S8_peakcall_MACS2_rendition_1E-8_downsampled_try3_peak_989	535	22.6294	53.5811	49.9338	108
chr1	122052006	122052204	Project004-IPSHOCH-Exp5-ChIP-NPC-CTCF-IP-Blobel-Rep2-S1_S8_peakcall_MACS2_rendition_1E-8_downsampled_try3_peak_990	441	17.9508	44.1091	40.6737	107
chr1	122068456	122068652	Project004-IPSHOCH-Exp5-ChIP-NPC-CTCF-IP-Blobel-Rep2-S1_S8_peakcall_MACS2_rendition_1E-8_downsampled_try3_peak_991	467	20.7692	46.7295	43.238	84
chr1	122093691	122094088	Project004-IPSHOCH-Exp5-ChIP-NPC-CTCF-IP-Blobel-Rep2-S1_S8_peakcall_MACS2_rendition_1E-8_downsampled_try3_peak_992	566	17.5	56.6146	52.8939	246
chr1	122127900	122128210	Project004-IPSHOCH-Exp5-ChIP-NPC-CTCF-IP-Blobel-Rep2-S1_S8_peakcall_MACS2_rendition_1E-8_downsampled_try3_peak_993	339	16.0062	33.9132	30.6935	202
chr1	122224295	122224560	Project004-IPSHOCH-Exp5-ChIP-NPC-CTCF-IP-Blobel-Rep2-S1_S8_peakcall_MACS2_rendition_1E-8_downsampled_try3_peak_994	320	13.3784	32.0676	28.8888	155
chr1	122234666	122234797	Project004-IPSHOCH-Exp5-ChIP-NPC-CTCF-IP-Blobel-Rep2-S1_S8_peakcall_MACS2_rendition_1E-8_downsampled_try3_peak_995	164	9.38293	16.423	13.5789	57
chr1	122236985	122237119	Project004-IPSHOCH-Exp5-ChIP-NPC-CTCF-IP-Blobel-Rep2-S1_S8_peakcall_MACS2_rendition_1E-8_downsampled_try3_peak_996	219	11.5907	21.9462	18.9742	99
chr1	122239059	122239209	Project004-IPSHOCH-Exp5-ChIP-NPC-CTCF-IP-Blobel-Rep2-S1_S8_peakcall_MACS2_rendition_1E-8_downsampled_try3_peak_997	267	11.7568	26.7382	23.6677	102
chr1	122365584	122365764	Project004-IPSHOCH-Exp5-ChIP-NPC-CTCF-IP-Blobel-Rep2-S1_S8_peakcall_MACS2_rendition_1E-8_downsampled_try3_peak_998	335	16.1538	33.5631	30.3543	65
chr1	122445978	122446176	Project004-IPSHOCH-Exp5-ChIP-NPC-CTCF-IP-Blobel-Rep2-S1_S8_peakcall_MACS2_rendition_1E-8_downsampled_try3_peak_999	492	18.2432	49.2158	45.6608	95
chr1	122446896	122447114	Project004-IPSHOCH-Exp5-ChIP-NPC-CTCF-IP-Blobel-Rep2-S1_S8_peakcall_MACS2_rendition_1E-8_downsampled_try3_peak_1000	553	23.6538	55.3579	51.6521	119
chr1	122483137	122483353	Project004-IPSHOCH-Exp5-ChIP-NPC-CTCF-IP-Blobel-Rep2-S1_S8_peakcall_MACS2_rendition_1E-8_downsampled_try3_peak_1001	598	21.0811	59.8822	56.0741	115
chr1	122491198	122491400	Project004-IPSHOCH-Exp5-ChIP-NPC-CTCF-IP-Blobel-Rep2-S1_S8_peakcall_MACS2_rendition_1E-8_downsampled_try3_peak_1002	290	14.5051	29.0062	25.8892	114
chr1	122564520	122564663	Project004-IPSHOCH-Exp5-ChIP-NPC-CTCF-IP-Blobel-Rep2-S1_S8_peakcall_MACS2_rendition_1E-8_downsampled_try3_peak_1003	258	13.2692	25.8156	22.7667	50
chr1	122950420	122950597	Project004-IPSHOCH-Exp5-ChIP-NPC-CTCF-IP-Blobel-Rep2-S1_S8_peakcall_MACS2_rendition_1E-8_downsampled_try3_peak_1004	307	12.973	30.7148	27.5609	88
chr1	123076969	123077209	Project004-IPSHOCH-Exp5-ChIP-NPC-CTCF-IP-Blobel-Rep2-S1_S8_peakcall_MACS2_rendition_1E-8_downsampled_try3_peak_1005	715	28.8462	71.5302	67.4151	121
chr1	123085589	123085730	Project004-IPSHOCH-Exp5-ChIP-NPC-CTCF-IP-Blobel-Rep2-S1_S8_peakcall_MACS2_rendition_1E-8_downsampled_try3_peak_1006	229	12.1843	22.9595	19.9656	92
chr1	123112544	123112725	Project004-IPSHOCH-Exp5-ChIP-NPC-CTCF-IP-Blobel-Rep2-S1_S8_peakcall_MACS2_rendition_1E-8_downsampled_try3_peak_1007	402	18.5665	40.2222	36.8751	84
chr1	123145749	123145947	Project004-IPSHOCH-Exp5-ChIP-NPC-CTCF-IP-Blobel-Rep2-S1_S8_peakcall_MACS2_rendition_1E-8_downsampled_try3_peak_1008	214	11.6041	21.496	18.5379	113
chr1	123296943	123297146	Project004-IPSHOCH-Exp5-ChIP-NPC-CTCF-IP-Blobel-Rep2-S1_S8_peakcall_MACS2_rendition_1E-8_downsampled_try3_peak_1009	280	12.1622	28.0497	24.9519	102
chr1	123337721	123337944	Project004-IPSHOCH-Exp5-ChIP-NPC-CTCF-IP-Blobel-Rep2-S1_S8_peakcall_MACS2_rendition_1E-8_downsampled_try3_peak_1010	627	26.1092	62.7096	58.8287	108
chr1	123386923	123387159	Project004-IPSHOCH-Exp5-ChIP-NPC-CTCF-IP-Blobel-Rep2-S1_S8_peakcall_MACS2_rendition_1E-8_downsampled_try3_peak_1011	450	20.1923	45.0382	41.5819	114
chr1	123464494	123464743	Project004-IPSHOCH-Exp5-ChIP-NPC-CTCF-IP-Blobel-Rep2-S1_S8_peakcall_MACS2_rendition_1E-8_downsampled_try3_peak_1012	594	18.125	59.4496	55.6513	122
chr1	123497788	123497960	Project004-IPSHOCH-Exp5-ChIP-NPC-CTCF-IP-Blobel-Rep2-S1_S8_peakcall_MACS2_rendition_1E-8_downsampled_try3_peak_1013	293	12.5676	29.3754	26.2484	91
chr1	124336041	124336207	Project004-IPSHOCH-Exp5-ChIP-NPC-CTCF-IP-Blobel-Rep2-S1_S8_peakcall_MACS2_rendition_1E-8_downsampled_try3_peak_1014	290	14.5051	29.0062	25.8892	69
chr1	125871173	125871557	Project004-IPSHOCH-Exp5-ChIP-NPC-CTCF-IP-Blobel-Rep2-S1_S8_peakcall_MACS2_rendition_1E-8_downsampled_try3_peak_1015	645	26.6894	64.5131	60.5886	211
chr1	125938246	125938442	Project004-IPSHOCH-Exp5-ChIP-NPC-CTCF-IP-Blobel-Rep2-S1_S8_peakcall_MACS2_rendition_1E-8_downsampled_try3_peak_1016	273	13.8461	27.331	24.2518	86
chr1	125999736	125999868	Project004-IPSHOCH-Exp5-ChIP-NPC-CTCF-IP-Blobel-Rep2-S1_S8_peakcall_MACS2_rendition_1E-8_downsampled_try3_peak_1017	132	8.12287	13.2009	10.4334	45
chr1	126346806	126346991	Project004-IPSHOCH-Exp5-ChIP-NPC-CTCF-IP-Blobel-Rep2-S1_S8_peakcall_MACS2_rendition_1E-8_downsampled_try3_peak_1018	229	12.1843	22.9595	19.9656	90
chr1	126414231	126414422	Project004-IPSHOCH-Exp5-ChIP-NPC-CTCF-IP-Blobel-Rep2-S1_S8_peakcall_MACS2_rendition_1E-8_downsampled_try3_peak_1019	326	15.2471	32.624	29.4358	105
chr1	126571122	126571296	Project004-IPSHOCH-Exp5-ChIP-NPC-CTCF-IP-Blobel-Rep2-S1_S8_peakcall_MACS2_rendition_1E-8_downsampled_try3_peak_1020	204	9.72973	20.4115	17.4743	71
chr1	126614831	126614995	Project004-IPSHOCH-Exp5-ChIP-NPC-CTCF-IP-Blobel-Rep2-S1_S8_peakcall_MACS2_rendition_1E-8_downsampled_try3_peak_1021	518	22.5	51.8733	48.2623	64
chr1	127267327	127267786	Project004-IPSHOCH-Exp5-ChIP-NPC-CTCF-IP-Blobel-Rep2-S1_S8_peakcall_MACS2_rendition_1E-8_downsampled_try3_peak_1022	755	30.1706	75.5232	71.3028	219
chr1	127415750	127415906	Project004-IPSHOCH-Exp5-ChIP-NPC-CTCF-IP-Blobel-Rep2-S1_S8_peakcall_MACS2_rendition_1E-8_downsampled_try3_peak_1023	216	10.1351	21.6442	18.6794	74
chr1	127470915	127471111	Project004-IPSHOCH-Exp5-ChIP-NPC-CTCF-IP-Blobel-Rep2-S1_S8_peakcall_MACS2_rendition_1E-8_downsampled_try3_peak_1024	175	7.8125	17.5473	14.6752	135
chr1	127504088	127504324	Project004-IPSHOCH-Exp5-ChIP-NPC-CTCF-IP-Blobel-Rep2-S1_S8_peakcall_MACS2_rendition_1E-8_downsampled_try3_peak_1025	642	26.5385	64.2484	60.3308	84
chr1	127626322	127626500	Project004-IPSHOCH-Exp5-ChIP-NPC-CTCF-IP-Blobel-Rep2-S1_S8_peakcall_MACS2_rendition_1E-8_downsampled_try3_peak_1026	134	7.2973	13.4146	10.6397	74
chr1	127686423	127686697	Project004-IPSHOCH-Exp5-ChIP-NPC-CTCF-IP-Blobel-Rep2-S1_S8_peakcall_MACS2_rendition_1E-8_downsampled_try3_peak_1027	693	23.5135	69.35	65.3014	111
chr1	127807150	127807368	Project004-IPSHOCH-Exp5-ChIP-NPC-CTCF-IP-Blobel-Rep2-S1_S8_peakcall_MACS2_rendition_1E-8_downsampled_try3_peak_1028	307	12.973	30.7148	27.5609	109
chr1	128328352	128328569	Project004-IPSHOCH-Exp5-ChIP-NPC-CTCF-IP-Blobel-Rep2-S1_S8_peakcall_MACS2_rendition_1E-8_downsampled_try3_peak_1029	198	7.07143	19.8608	16.9415	57
chr1	128328982	128329113	Project004-IPSHOCH-Exp5-ChIP-NPC-CTCF-IP-Blobel-Rep2-S1_S8_peakcall_MACS2_rendition_1E-8_downsampled_try3_peak_1030	200	11.0239	20.0537	17.1237	59
chr1	128381344	128381467	Project004-IPSHOCH-Exp5-ChIP-NPC-CTCF-IP-Blobel-Rep2-S1_S8_peakcall_MACS2_rendition_1E-8_downsampled_try3_peak_1031	132	8.12287	13.2009	10.4334	65
chr1	128826352	128826493	Project004-IPSHOCH-Exp5-ChIP-NPC-CTCF-IP-Blobel-Rep2-S1_S8_peakcall_MACS2_rendition_1E-8_downsampled_try3_peak_1032	224	10.6247	22.4726	19.4968	47
chr1	128828372	128828650	Project004-IPSHOCH-Exp5-ChIP-NPC-CTCF-IP-Blobel-Rep2-S1_S8_peakcall_MACS2_rendition_1E-8_downsampled_try3_peak_1033	741	28.3912	74.1667	69.9856	139
chr1	128863026	128863258	Project004-IPSHOCH-Exp5-ChIP-NPC-CTCF-IP-Blobel-Rep2-S1_S8_peakcall_MACS2_rendition_1E-8_downsampled_try3_peak_1034	290	14.5051	29.0062	25.8892	129
chr1	128889931	128890187	Project004-IPSHOCH-Exp5-ChIP-NPC-CTCF-IP-Blobel-Rep2-S1_S8_peakcall_MACS2_rendition_1E-8_downsampled_try3_peak_1035	582	22.5701	58.2566	54.4953	162
chr1	128908484	128908734	Project004-IPSHOCH-Exp5-ChIP-NPC-CTCF-IP-Blobel-Rep2-S1_S8_peakcall_MACS2_rendition_1E-8_downsampled_try3_peak_1036	552	19.8649	55.2579	51.5604	145
chr1	128914339	128914536	Project004-IPSHOCH-Exp5-ChIP-NPC-CTCF-IP-Blobel-Rep2-S1_S8_peakcall_MACS2_rendition_1E-8_downsampled_try3_peak_1037	353	16.8259	35.3259	32.0766	81
chr1	129099902	129100062	Project004-IPSHOCH-Exp5-ChIP-NPC-CTCF-IP-Blobel-Rep2-S1_S8_peakcall_MACS2_rendition_1E-8_downsampled_try3_peak_1038	187	9.34977	18.7236	15.8229	60
chr1	129135431	129135585	Project004-IPSHOCH-Exp5-ChIP-NPC-CTCF-IP-Blobel-Rep2-S1_S8_peakcall_MACS2_rendition_1E-8_downsampled_try3_peak_1039	259	13.3447	25.9459	22.8918	73
chr1	129306307	129306473	Project004-IPSHOCH-Exp5-ChIP-NPC-CTCF-IP-Blobel-Rep2-S1_S8_peakcall_MACS2_rendition_1E-8_downsampled_try3_peak_1040	228	10.5405	22.8938	19.9053	72
chr1	129355693	129355870	Project004-IPSHOCH-Exp5-ChIP-NPC-CTCF-IP-Blobel-Rep2-S1_S8_peakcall_MACS2_rendition_1E-8_downsampled_try3_peak_1041	364	12.8125	36.4172	33.1474	83
chr1	129381498	129381669	Project004-IPSHOCH-Exp5-ChIP-NPC-CTCF-IP-Blobel-Rep2-S1_S8_peakcall_MACS2_rendition_1E-8_downsampled_try3_peak_1042	156	8.10811	15.6651	12.8402	69
chr1	129383847	129384034	Project004-IPSHOCH-Exp5-ChIP-NPC-CTCF-IP-Blobel-Rep2-S1_S8_peakcall_MACS2_rendition_1E-8_downsampled_try3_peak_1043	321	15.6655	32.1345	28.9516	98
chr1	129393449	129393592	Project004-IPSHOCH-Exp5-ChIP-NPC-CTCF-IP-Blobel-Rep2-S1_S8_peakcall_MACS2_rendition_1E-8_downsampled_try3_peak_1044	214	11.6041	21.496	18.5379	101
chr1	129396856	129397111	Project004-IPSHOCH-Exp5-ChIP-NPC-CTCF-IP-Blobel-Rep2-S1_S8_peakcall_MACS2_rendition_1E-8_downsampled_try3_peak_1045	729	28.7007	72.9612	68.811	136
chr1	129576510	129576672	Project004-IPSHOCH-Exp5-ChIP-NPC-CTCF-IP-Blobel-Rep2-S1_S8_peakcall_MACS2_rendition_1E-8_downsampled_try3_peak_1046	313	11.5625	31.3987	28.2354	93
chr1	129593231	129593393	Project004-IPSHOCH-Exp5-ChIP-NPC-CTCF-IP-Blobel-Rep2-S1_S8_peakcall_MACS2_rendition_1E-8_downsampled_try3_peak_1047	258	13.2692	25.8156	22.7667	85
chr1	129723961	129724182	Project004-IPSHOCH-Exp5-ChIP-NPC-CTCF-IP-Blobel-Rep2-S1_S8_peakcall_MACS2_rendition_1E-8_downsampled_try3_peak_1048	724	28.8674	72.4013	68.2703	100
chr1	130037736	130037943	Project004-IPSHOCH-Exp5-ChIP-NPC-CTCF-IP-Blobel-Rep2-S1_S8_peakcall_MACS2_rendition_1E-8_downsampled_try3_peak_1049	322	15.0332	32.2631	29.0796	98
chr1	130205746	130205930	Project004-IPSHOCH-Exp5-ChIP-NPC-CTCF-IP-Blobel-Rep2-S1_S8_peakcall_MACS2_rendition_1E-8_downsampled_try3_peak_1050	258	13.2692	25.8156	22.7667	88
chr1	130265320	130265632	Project004-IPSHOCH-Exp5-ChIP-NPC-CTCF-IP-Blobel-Rep2-S1_S8_peakcall_MACS2_rendition_1E-8_downsampled_try3_peak_1051	452	19.0744	45.2675	41.801	132
chr1	130268844	130268979	Project004-IPSHOCH-Exp5-ChIP-NPC-CTCF-IP-Blobel-Rep2-S1_S8_peakcall_MACS2_rendition_1E-8_downsampled_try3_peak_1052	296	14.1956	29.6239	26.4943	47
chr1	130489118	130489295	Project004-IPSHOCH-Exp5-ChIP-NPC-CTCF-IP-Blobel-Rep2-S1_S8_peakcall_MACS2_rendition_1E-8_downsampled_try3_peak_1053	362	15.8471	36.2599	32.9955	100
chr1	130720800	130721183	Project004-IPSHOCH-Exp5-ChIP-NPC-CTCF-IP-Blobel-Rep2-S1_S8_peakcall_MACS2_rendition_1E-8_downsampled_try3_peak_1054	660	27.1154	66.0553	62.0933	204
chr1	130729258	130729476	Project004-IPSHOCH-Exp5-ChIP-NPC-CTCF-IP-Blobel-Rep2-S1_S8_peakcall_MACS2_rendition_1E-8_downsampled_try3_peak_1055	808	31.7308	80.8249	76.4573	103
chr1	130771890	130772117	Project004-IPSHOCH-Exp5-ChIP-NPC-CTCF-IP-Blobel-Rep2-S1_S8_peakcall_MACS2_rendition_1E-8_downsampled_try3_peak_1056	758	25.1351	75.8121	71.5773	117
chr1	130974946	130975112	Project004-IPSHOCH-Exp5-ChIP-NPC-CTCF-IP-Blobel-Rep2-S1_S8_peakcall_MACS2_rendition_1E-8_downsampled_try3_peak_1057	200	11.0239	20.0537	17.1237	61
chr1	131141021	131141180	Project004-IPSHOCH-Exp5-ChIP-NPC-CTCF-IP-Blobel-Rep2-S1_S8_peakcall_MACS2_rendition_1E-8_downsampled_try3_peak_1058	214	11.6041	21.496	18.5379	44
chr1	131740081	131740297	Project004-IPSHOCH-Exp5-ChIP-NPC-CTCF-IP-Blobel-Rep2-S1_S8_peakcall_MACS2_rendition_1E-8_downsampled_try3_peak_1059	321	15.6655	32.1345	28.9516	119
chr1	131816041	131816205	Project004-IPSHOCH-Exp5-ChIP-NPC-CTCF-IP-Blobel-Rep2-S1_S8_peakcall_MACS2_rendition_1E-8_downsampled_try3_peak_1060	305	15.0853	30.5622	27.4146	102
chr1	132063897	132064114	Project004-IPSHOCH-Exp5-ChIP-NPC-CTCF-IP-Blobel-Rep2-S1_S8_peakcall_MACS2_rendition_1E-8_downsampled_try3_peak_1061	293	12.5676	29.3754	26.2484	112
chr1	132089362	132089496	Project004-IPSHOCH-Exp5-ChIP-NPC-CTCF-IP-Blobel-Rep2-S1_S8_peakcall_MACS2_rendition_1E-8_downsampled_try3_peak_1062	214	11.6041	21.496	18.5379	70
chr1	132171201	132171327	Project004-IPSHOCH-Exp5-ChIP-NPC-CTCF-IP-Blobel-Rep2-S1_S8_peakcall_MACS2_rendition_1E-8_downsampled_try3_peak_1063	186	10.4437	18.6335	15.7332	61
chr1	132246951	132247242	Project004-IPSHOCH-Exp5-ChIP-NPC-CTCF-IP-Blobel-Rep2-S1_S8_peakcall_MACS2_rendition_1E-8_downsampled_try3_peak_1064	484	20.5047	48.4384	44.9052	113
chr1	132268803	132269023	Project004-IPSHOCH-Exp5-ChIP-NPC-CTCF-IP-Blobel-Rep2-S1_S8_peakcall_MACS2_rendition_1E-8_downsampled_try3_peak_1065	376	15	37.6044	34.309	112
chr1	132359045	132359324	Project004-IPSHOCH-Exp5-ChIP-NPC-CTCF-IP-Blobel-Rep2-S1_S8_peakcall_MACS2_rendition_1E-8_downsampled_try3_peak_1066	477	17.8378	47.7286	44.2084	96
chr1	132444633	132444777	Project004-IPSHOCH-Exp5-ChIP-NPC-CTCF-IP-Blobel-Rep2-S1_S8_peakcall_MACS2_rendition_1E-8_downsampled_try3_peak_1067	289	13.446	28.9749	25.8625	47
chr1	132472602	132472812	Project004-IPSHOCH-Exp5-ChIP-NPC-CTCF-IP-Blobel-Rep2-S1_S8_peakcall_MACS2_rendition_1E-8_downsampled_try3_peak_1068	520	22.628	52.0971	48.4764	101
chr1	132530656	132530917	Project004-IPSHOCH-Exp5-ChIP-NPC-CTCF-IP-Blobel-Rep2-S1_S8_peakcall_MACS2_rendition_1E-8_downsampled_try3_peak_1069	922	35.1923	92.2354	87.5823	111
chr1	132588555	132588791	Project004-IPSHOCH-Exp5-ChIP-NPC-CTCF-IP-Blobel-Rep2-S1_S8_peakcall_MACS2_rendition_1E-8_downsampled_try3_peak_1070	485	20.9736	48.5029	44.9659	96
chr1	132673354	132673498	Project004-IPSHOCH-Exp5-ChIP-NPC-CTCF-IP-Blobel-Rep2-S1_S8_peakcall_MACS2_rendition_1E-8_downsampled_try3_peak_1071	200	11.0239	20.0537	17.1237	83
chr1	132680826	132680998	Project004-IPSHOCH-Exp5-ChIP-NPC-CTCF-IP-Blobel-Rep2-S1_S8_peakcall_MACS2_rendition_1E-8_downsampled_try3_peak_1072	367	17.3077	36.7727	33.4966	79
chr1	132693637	132693800	Project004-IPSHOCH-Exp5-ChIP-NPC-CTCF-IP-Blobel-Rep2-S1_S8_peakcall_MACS2_rendition_1E-8_downsampled_try3_peak_1073	280	12.1622	28.0497	24.9519	72
chr1	132771759	132772023	Project004-IPSHOCH-Exp5-ChIP-NPC-CTCF-IP-Blobel-Rep2-S1_S8_peakcall_MACS2_rendition_1E-8_downsampled_try3_peak_1074	770	30.5769	77.0825	72.8198	130
chr1	132773575	132773849	Project004-IPSHOCH-Exp5-ChIP-NPC-CTCF-IP-Blobel-Rep2-S1_S8_peakcall_MACS2_rendition_1E-8_downsampled_try3_peak_1075	741	28.3912	74.1667	69.9856	123
chr1	132876130	132876315	Project004-IPSHOCH-Exp5-ChIP-NPC-CTCF-IP-Blobel-Rep2-S1_S8_peakcall_MACS2_rendition_1E-8_downsampled_try3_peak_1076	326	11.875	32.6367	29.4451	103
chr1	132949902	132950146	Project004-IPSHOCH-Exp5-ChIP-NPC-CTCF-IP-Blobel-Rep2-S1_S8_peakcall_MACS2_rendition_1E-8_downsampled_try3_peak_1077	580	17.8125	58.0283	54.2689	135
chr1	132956962	132957101	Project004-IPSHOCH-Exp5-ChIP-NPC-CTCF-IP-Blobel-Rep2-S1_S8_peakcall_MACS2_rendition_1E-8_downsampled_try3_peak_1078	362	16.6138	36.2174	32.9541	58
chr1	133012558	133012799	Project004-IPSHOCH-Exp5-ChIP-NPC-CTCF-IP-Blobel-Rep2-S1_S8_peakcall_MACS2_rendition_1E-8_downsampled_try3_peak_1079	715	28.8462	71.5302	67.4151	120
chr1	133015666	133015905	Project004-IPSHOCH-Exp5-ChIP-NPC-CTCF-IP-Blobel-Rep2-S1_S8_peakcall_MACS2_rendition_1E-8_downsampled_try3_peak_1080	191	10.4868	19.1402	16.2346	72
chr1	133052112	133052358	Project004-IPSHOCH-Exp5-ChIP-NPC-CTCF-IP-Blobel-Rep2-S1_S8_peakcall_MACS2_rendition_1E-8_downsampled_try3_peak_1081	436	11.7857	43.6318	40.2013	133
chr1	133078269	133078506	Project004-IPSHOCH-Exp5-ChIP-NPC-CTCF-IP-Blobel-Rep2-S1_S8_peakcall_MACS2_rendition_1E-8_downsampled_try3_peak_1082	815	22.8125	81.5958	77.2107	121
chr1	133104125	133104342	Project004-IPSHOCH-Exp5-ChIP-NPC-CTCF-IP-Blobel-Rep2-S1_S8_peakcall_MACS2_rendition_1E-8_downsampled_try3_peak_1083	455	15	45.5931	42.1206	105
chr1	133142583	133142761	Project004-IPSHOCH-Exp5-ChIP-NPC-CTCF-IP-Blobel-Rep2-S1_S8_peakcall_MACS2_rendition_1E-8_downsampled_try3_peak_1084	96	5.3125	9.62915	6.96509	102
chr1	133143092	133143278	Project004-IPSHOCH-Exp5-ChIP-NPC-CTCF-IP-Blobel-Rep2-S1_S8_peakcall_MACS2_rendition_1E-8_downsampled_try3_peak_1085	452	20.3072	45.2387	41.7737	80
chr1	133157028	133157254	Project004-IPSHOCH-Exp5-ChIP-NPC-CTCF-IP-Blobel-Rep2-S1_S8_peakcall_MACS2_rendition_1E-8_downsampled_try3_peak_1086	905	33.123	90.5048	85.8933	103
chr1	133166887	133167192	Project004-IPSHOCH-Exp5-ChIP-NPC-CTCF-IP-Blobel-Rep2-S1_S8_peakcall_MACS2_rendition_1E-8_downsampled_try3_peak_1087	630	21.8919	63.0066	59.1167	135
chr1	133187326	133187463	Project004-IPSHOCH-Exp5-ChIP-NPC-CTCF-IP-Blobel-Rep2-S1_S8_peakcall_MACS2_rendition_1E-8_downsampled_try3_peak_1088	227	8.38983	22.7506	19.7726	77
chr1	133445032	133445230	Project004-IPSHOCH-Exp5-ChIP-NPC-CTCF-IP-Blobel-Rep2-S1_S8_peakcall_MACS2_rendition_1E-8_downsampled_try3_peak_1089	293	12.5676	29.3754	26.2484	122
chr1	133451825	133452004	Project004-IPSHOCH-Exp5-ChIP-NPC-CTCF-IP-Blobel-Rep2-S1_S8_peakcall_MACS2_rendition_1E-8_downsampled_try3_peak_1090	474	18.5611	47.4271	43.9155	106
chr1	133497015	133497151	Project004-IPSHOCH-Exp5-ChIP-NPC-CTCF-IP-Blobel-Rep2-S1_S8_peakcall_MACS2_rendition_1E-8_downsampled_try3_peak_1091	205	11.0388	20.5326	17.5936	59
chr1	133510034	133510212	Project004-IPSHOCH-Exp5-ChIP-NPC-CTCF-IP-Blobel-Rep2-S1_S8_peakcall_MACS2_rendition_1E-8_downsampled_try3_peak_1092	204	9.72973	20.4115	17.4743	85
chr1	133554763	133554980	Project004-IPSHOCH-Exp5-ChIP-NPC-CTCF-IP-Blobel-Rep2-S1_S8_peakcall_MACS2_rendition_1E-8_downsampled_try3_peak_1093	577	15.7627	57.7747	54.02	98
chr1	133605029	133605183	Project004-IPSHOCH-Exp5-ChIP-NPC-CTCF-IP-Blobel-Rep2-S1_S8_peakcall_MACS2_rendition_1E-8_downsampled_try3_peak_1094	228	10.5405	22.8938	19.9053	89
chr1	133608985	133609327	Project004-IPSHOCH-Exp5-ChIP-NPC-CTCF-IP-Blobel-Rep2-S1_S8_peakcall_MACS2_rendition_1E-8_downsampled_try3_peak_1095	681	27.8498	68.1478	64.1207	219
chr1	133662233	133662496	Project004-IPSHOCH-Exp5-ChIP-NPC-CTCF-IP-Blobel-Rep2-S1_S8_peakcall_MACS2_rendition_1E-8_downsampled_try3_peak_1096	1096	33.2432	109.667	104.62	136
chr1	133742991	133743213	Project004-IPSHOCH-Exp5-ChIP-NPC-CTCF-IP-Blobel-Rep2-S1_S8_peakcall_MACS2_rendition_1E-8_downsampled_try3_peak_1097	404	15.8108	40.4434	37.0817	99
chr1	133763671	133763935	Project004-IPSHOCH-Exp5-ChIP-NPC-CTCF-IP-Blobel-Rep2-S1_S8_peakcall_MACS2_rendition_1E-8_downsampled_try3_peak_1098	583	20.6757	58.3323	54.5591	158
chr1	133779516	133779639	Project004-IPSHOCH-Exp5-ChIP-NPC-CTCF-IP-Blobel-Rep2-S1_S8_peakcall_MACS2_rendition_1E-8_downsampled_try3_peak_1099	157	8.18599	15.7956	12.9623	60
chr1	133834356	133834593	Project004-IPSHOCH-Exp5-ChIP-NPC-CTCF-IP-Blobel-Rep2-S1_S8_peakcall_MACS2_rendition_1E-8_downsampled_try3_peak_1100	522	19.0541	52.2186	48.5899	96
chr1	133878250	133878542	Project004-IPSHOCH-Exp5-ChIP-NPC-CTCF-IP-Blobel-Rep2-S1_S8_peakcall_MACS2_rendition_1E-8_downsampled_try3_peak_1101	999	37.5	99.9854	95.1391	172
chr1	133879539	133879733	Project004-IPSHOCH-Exp5-ChIP-NPC-CTCF-IP-Blobel-Rep2-S1_S8_peakcall_MACS2_rendition_1E-8_downsampled_try3_peak_1102	615	22.5385	61.5603	57.708	86
chr1	133891704	133891933	Project004-IPSHOCH-Exp5-ChIP-NPC-CTCF-IP-Blobel-Rep2-S1_S8_peakcall_MACS2_rendition_1E-8_downsampled_try3_peak_1103	304	10.1695	30.4589	27.3154	120
chr1	133897171	133897327	Project004-IPSHOCH-Exp5-ChIP-NPC-CTCF-IP-Blobel-Rep2-S1_S8_peakcall_MACS2_rendition_1E-8_downsampled_try3_peak_1104	200	10.1261	20.016	17.0908	76
chr1	133943052	133943242	Project004-IPSHOCH-Exp5-ChIP-NPC-CTCF-IP-Blobel-Rep2-S1_S8_peakcall_MACS2_rendition_1E-8_downsampled_try3_peak_1105	442	14.6875	44.2539	40.8143	95
chr1	134006126	134006270	Project004-IPSHOCH-Exp5-ChIP-NPC-CTCF-IP-Blobel-Rep2-S1_S8_peakcall_MACS2_rendition_1E-8_downsampled_try3_peak_1106	169	9.46372	16.9833	14.126	114
chr1	134013280	134013597	Project004-IPSHOCH-Exp5-ChIP-NPC-CTCF-IP-Blobel-Rep2-S1_S8_peakcall_MACS2_rendition_1E-8_downsampled_try3_peak_1107	868	33.6519	86.8316	82.3089	158
chr1	134017780	134018021	Project004-IPSHOCH-Exp5-ChIP-NPC-CTCF-IP-Blobel-Rep2-S1_S8_peakcall_MACS2_rendition_1E-8_downsampled_try3_peak_1108	570	23.7333	57.0193	53.2789	122
chr1	134036865	134036999	Project004-IPSHOCH-Exp5-ChIP-NPC-CTCF-IP-Blobel-Rep2-S1_S8_peakcall_MACS2_rendition_1E-8_downsampled_try3_peak_1109	171	9.80769	17.1414	14.2785	58
chr1	134052355	134052662	Project004-IPSHOCH-Exp5-ChIP-NPC-CTCF-IP-Blobel-Rep2-S1_S8_peakcall_MACS2_rendition_1E-8_downsampled_try3_peak_1110	608	18.4375	60.8783	57.0443	179
chr1	134054002	134054266	Project004-IPSHOCH-Exp5-ChIP-NPC-CTCF-IP-Blobel-Rep2-S1_S8_peakcall_MACS2_rendition_1E-8_downsampled_try3_peak_1111	727	18.5593	72.7893	68.6429	110
chr1	134059251	134059468	Project004-IPSHOCH-Exp5-ChIP-NPC-CTCF-IP-Blobel-Rep2-S1_S8_peakcall_MACS2_rendition_1E-8_downsampled_try3_peak_1112	144	6.875	14.4294	11.6384	101
chr1	134062578	134062708	Project004-IPSHOCH-Exp5-ChIP-NPC-CTCF-IP-Blobel-Rep2-S1_S8_peakcall_MACS2_rendition_1E-8_downsampled_try3_peak_1113	168	8.51351	16.8225	13.9686	65
chr1	134088834	134089038	Project004-IPSHOCH-Exp5-ChIP-NPC-CTCF-IP-Blobel-Rep2-S1_S8_peakcall_MACS2_rendition_1E-8_downsampled_try3_peak_1114	400	18.4615	40.0393	36.6973	97
chr1	134097156	134097286	Project004-IPSHOCH-Exp5-ChIP-NPC-CTCF-IP-Blobel-Rep2-S1_S8_peakcall_MACS2_rendition_1E-8_downsampled_try3_peak_1115	156	8.39668	15.6799	12.8536	51
chr1	134107633	134107857	Project004-IPSHOCH-Exp5-ChIP-NPC-CTCF-IP-Blobel-Rep2-S1_S8_peakcall_MACS2_rendition_1E-8_downsampled_try3_peak_1116	341	15.7729	34.1464	30.9231	111
chr1	134108779	134109015	Project004-IPSHOCH-Exp5-ChIP-NPC-CTCF-IP-Blobel-Rep2-S1_S8_peakcall_MACS2_rendition_1E-8_downsampled_try3_peak_1117	468	19.5764	46.8622	43.3653	120
chr1	134134212	134134483	Project004-IPSHOCH-Exp5-ChIP-NPC-CTCF-IP-Blobel-Rep2-S1_S8_peakcall_MACS2_rendition_1E-8_downsampled_try3_peak_1118	681	20	68.1289	64.1078	114
chr1	134184814	134184971	Project004-IPSHOCH-Exp5-ChIP-NPC-CTCF-IP-Blobel-Rep2-S1_S8_peakcall_MACS2_rendition_1E-8_downsampled_try3_peak_1119	216	10.1351	21.6442	18.6794	59
chr1	134202817	134203058	Project004-IPSHOCH-Exp5-ChIP-NPC-CTCF-IP-Blobel-Rep2-S1_S8_peakcall_MACS2_rendition_1E-8_downsampled_try3_peak_1120	305	15.0853	30.5622	27.4146	149
chr1	134209359	134209513	Project004-IPSHOCH-Exp5-ChIP-NPC-CTCF-IP-Blobel-Rep2-S1_S8_peakcall_MACS2_rendition_1E-8_downsampled_try3_peak_1121	228	10.5405	22.8938	19.9053	86
chr1	134252461	134252704	Project004-IPSHOCH-Exp5-ChIP-NPC-CTCF-IP-Blobel-Rep2-S1_S8_peakcall_MACS2_rendition_1E-8_downsampled_try3_peak_1122	892	24.375	89.2882	84.7027	153
chr1	134264207	134264461	Project004-IPSHOCH-Exp5-ChIP-NPC-CTCF-IP-Blobel-Rep2-S1_S8_peakcall_MACS2_rendition_1E-8_downsampled_try3_peak_1123	680	24.3062	68.0688	64.0529	120
chr1	134286954	134287114	Project004-IPSHOCH-Exp5-ChIP-NPC-CTCF-IP-Blobel-Rep2-S1_S8_peakcall_MACS2_rendition_1E-8_downsampled_try3_peak_1124	239	11.5069	23.9511	20.9451	84
chr1	134314001	134314168	Project004-IPSHOCH-Exp5-ChIP-NPC-CTCF-IP-Blobel-Rep2-S1_S8_peakcall_MACS2_rendition_1E-8_downsampled_try3_peak_1125	231	9.7172	23.1474	20.1498	75
chr1	134417399	134417522	Project004-IPSHOCH-Exp5-ChIP-NPC-CTCF-IP-Blobel-Rep2-S1_S8_peakcall_MACS2_rendition_1E-8_downsampled_try3_peak_1126	172	9.86348	17.2368	14.3688	58
chr1	134420548	134420812	Project004-IPSHOCH-Exp5-ChIP-NPC-CTCF-IP-Blobel-Rep2-S1_S8_peakcall_MACS2_rendition_1E-8_downsampled_try3_peak_1127	352	16.757	35.2061	31.9612	130
chr1	134422454	134422710	Project004-IPSHOCH-Exp5-ChIP-NPC-CTCF-IP-Blobel-Rep2-S1_S8_peakcall_MACS2_rendition_1E-8_downsampled_try3_peak_1128	695	20.3125	69.5996	65.5435	133
chr1	134491233	134491588	Project004-IPSHOCH-Exp5-ChIP-NPC-CTCF-IP-Blobel-Rep2-S1_S8_peakcall_MACS2_rendition_1E-8_downsampled_try3_peak_1129	711	28.1488	71.1545	67.053	185
chr1	134505716	134506145	Project004-IPSHOCH-Exp5-ChIP-NPC-CTCF-IP-Blobel-Rep2-S1_S8_peakcall_MACS2_rendition_1E-8_downsampled_try3_peak_1130	486	21.4676	48.6447	45.1017	104
chr1	134655248	134655552	Project004-IPSHOCH-Exp5-ChIP-NPC-CTCF-IP-Blobel-Rep2-S1_S8_peakcall_MACS2_rendition_1E-8_downsampled_try3_peak_1131	525	14.7458	52.516	48.8807	99
chr1	134655661	134655870	Project004-IPSHOCH-Exp5-ChIP-NPC-CTCF-IP-Blobel-Rep2-S1_S8_peakcall_MACS2_rendition_1E-8_downsampled_try3_peak_1132	389	10.9286	38.9735	35.6542	105
chr1	134668117	134668337	Project004-IPSHOCH-Exp5-ChIP-NPC-CTCF-IP-Blobel-Rep2-S1_S8_peakcall_MACS2_rendition_1E-8_downsampled_try3_peak_1133	172	9.86348	17.2368	14.3688	96
chr1	134740355	134740513	Project004-IPSHOCH-Exp5-ChIP-NPC-CTCF-IP-Blobel-Rep2-S1_S8_peakcall_MACS2_rendition_1E-8_downsampled_try3_peak_1134	213	10.5864	21.3096	18.3605	77
chr1	134831575	134831742	Project004-IPSHOCH-Exp5-ChIP-NPC-CTCF-IP-Blobel-Rep2-S1_S8_peakcall_MACS2_rendition_1E-8_downsampled_try3_peak_1135	124	6.25	12.4453	9.69904	81
chr1	134865337	134865578	Project004-IPSHOCH-Exp5-ChIP-NPC-CTCF-IP-Blobel-Rep2-S1_S8_peakcall_MACS2_rendition_1E-8_downsampled_try3_peak_1136	455	15	45.5931	42.1206	118
chr1	134879402	134879605	Project004-IPSHOCH-Exp5-ChIP-NPC-CTCF-IP-Blobel-Rep2-S1_S8_peakcall_MACS2_rendition_1E-8_downsampled_try3_peak_1137	265	10.3125	26.5652	23.5028	86
chr1	134936043	134936374	Project004-IPSHOCH-Exp5-ChIP-NPC-CTCF-IP-Blobel-Rep2-S1_S8_peakcall_MACS2_rendition_1E-8_downsampled_try3_peak_1138	552	19.8649	55.2579	51.5604	120
chr1	134984307	134984518	Project004-IPSHOCH-Exp5-ChIP-NPC-CTCF-IP-Blobel-Rep2-S1_S8_peakcall_MACS2_rendition_1E-8_downsampled_try3_peak_1139	351	12.5	35.1463	31.9064	121
chr1	134998081	134998297	Project004-IPSHOCH-Exp5-ChIP-NPC-CTCF-IP-Blobel-Rep2-S1_S8_peakcall_MACS2_rendition_1E-8_downsampled_try3_peak_1140	580	17.8125	58.0283	54.2689	113
chr1	135042570	135042828	Project004-IPSHOCH-Exp5-ChIP-NPC-CTCF-IP-Blobel-Rep2-S1_S8_peakcall_MACS2_rendition_1E-8_downsampled_try3_peak_1141	512	14.4915	51.2195	47.6206	147
chr1	135060892	135061022	Project004-IPSHOCH-Exp5-ChIP-NPC-CTCF-IP-Blobel-Rep2-S1_S8_peakcall_MACS2_rendition_1E-8_downsampled_try3_peak_1142	132	8.12287	13.2009	10.4334	74
chr1	135074074	135074321	Project004-IPSHOCH-Exp5-ChIP-NPC-CTCF-IP-Blobel-Rep2-S1_S8_peakcall_MACS2_rendition_1E-8_downsampled_try3_peak_1143	583	21.6546	58.356	54.5818	121
chr1	135077580	135077819	Project004-IPSHOCH-Exp5-ChIP-NPC-CTCF-IP-Blobel-Rep2-S1_S8_peakcall_MACS2_rendition_1E-8_downsampled_try3_peak_1144	849	24.0682	84.9552	80.4809	124
chr1	135165256	135165395	Project004-IPSHOCH-Exp5-ChIP-NPC-CTCF-IP-Blobel-Rep2-S1_S8_peakcall_MACS2_rendition_1E-8_downsampled_try3_peak_1145	82	5.27027	8.22126	5.61394	27
chr1	135203457	135203674	Project004-IPSHOCH-Exp5-ChIP-NPC-CTCF-IP-Blobel-Rep2-S1_S8_peakcall_MACS2_rendition_1E-8_downsampled_try3_peak_1146	614	21.4865	61.4404	57.5919	116
chr1	135203936	135204314	Project004-IPSHOCH-Exp5-ChIP-NPC-CTCF-IP-Blobel-Rep2-S1_S8_peakcall_MACS2_rendition_1E-8_downsampled_try3_peak_1147	477	17.8378	47.7286	44.2084	212
chr1	135207924	135208076	Project004-IPSHOCH-Exp5-ChIP-NPC-CTCF-IP-Blobel-Rep2-S1_S8_peakcall_MACS2_rendition_1E-8_downsampled_try3_peak_1148	157	9.23077	15.7752	12.9422	71
chr1	135211068	135211236	Project004-IPSHOCH-Exp5-ChIP-NPC-CTCF-IP-Blobel-Rep2-S1_S8_peakcall_MACS2_rendition_1E-8_downsampled_try3_peak_1149	390	15.4054	39.0183	35.6872	84
chr1	135213841	135213964	Project004-IPSHOCH-Exp5-ChIP-NPC-CTCF-IP-Blobel-Rep2-S1_S8_peakcall_MACS2_rendition_1E-8_downsampled_try3_peak_1150	158	9.28328	15.8647	13.0259	51
chr1	135250176	135250431	Project004-IPSHOCH-Exp5-ChIP-NPC-CTCF-IP-Blobel-Rep2-S1_S8_peakcall_MACS2_rendition_1E-8_downsampled_try3_peak_1151	666	19.6875	66.6649	62.679	113
chr1	135277329	135277548	Project004-IPSHOCH-Exp5-ChIP-NPC-CTCF-IP-Blobel-Rep2-S1_S8_peakcall_MACS2_rendition_1E-8_downsampled_try3_peak_1152	536	23.0769	53.6102	49.9576	111
chr1	135278704	135278960	Project004-IPSHOCH-Exp5-ChIP-NPC-CTCF-IP-Blobel-Rep2-S1_S8_peakcall_MACS2_rendition_1E-8_downsampled_try3_peak_1153	219	11.5907	21.9462	18.9742	105
chr1	135282193	135282358	Project004-IPSHOCH-Exp5-ChIP-NPC-CTCF-IP-Blobel-Rep2-S1_S8_peakcall_MACS2_rendition_1E-8_downsampled_try3_peak_1154	230	9.375	23.0745	20.0771	60
chr1	135493428	135493578	Project004-IPSHOCH-Exp5-ChIP-NPC-CTCF-IP-Blobel-Rep2-S1_S8_peakcall_MACS2_rendition_1E-8_downsampled_try3_peak_1155	304	13.1747	30.4137	27.2723	79
chr1	135506902	135507154	Project004-IPSHOCH-Exp5-ChIP-NPC-CTCF-IP-Blobel-Rep2-S1_S8_peakcall_MACS2_rendition_1E-8_downsampled_try3_peak_1156	740	21.25	74.0511	69.8726	111
chr1	135598521	135598652	Project004-IPSHOCH-Exp5-ChIP-NPC-CTCF-IP-Blobel-Rep2-S1_S8_peakcall_MACS2_rendition_1E-8_downsampled_try3_peak_1157	213	11.5385	21.3832	18.4295	72
chr1	135609392	135609522	Project004-IPSHOCH-Exp5-ChIP-NPC-CTCF-IP-Blobel-Rep2-S1_S8_peakcall_MACS2_rendition_1E-8_downsampled_try3_peak_1158	112	6.48649	11.2573	8.54702	104
chr1	135613162	135613317	Project004-IPSHOCH-Exp5-ChIP-NPC-CTCF-IP-Blobel-Rep2-S1_S8_peakcall_MACS2_rendition_1E-8_downsampled_try3_peak_1159	204	9.72973	20.4115	17.4743	69
chr1	135632876	135633179	Project004-IPSHOCH-Exp5-ChIP-NPC-CTCF-IP-Blobel-Rep2-S1_S8_peakcall_MACS2_rendition_1E-8_downsampled_try3_peak_1160	666	19.6875	66.6649	62.679	122
chr1	135792951	135793177	Project004-IPSHOCH-Exp5-ChIP-NPC-CTCF-IP-Blobel-Rep2-S1_S8_peakcall_MACS2_rendition_1E-8_downsampled_try3_peak_1161	777	29.4427	77.7451	73.4609	111
chr1	135808058	135808287	Project004-IPSHOCH-Exp5-ChIP-NPC-CTCF-IP-Blobel-Rep2-S1_S8_peakcall_MACS2_rendition_1E-8_downsampled_try3_peak_1162	815	22.8125	81.5958	77.2107	113
chr1	135858355	135858566	Project004-IPSHOCH-Exp5-ChIP-NPC-CTCF-IP-Blobel-Rep2-S1_S8_peakcall_MACS2_rendition_1E-8_downsampled_try3_peak_1163	482	15.625	48.2983	44.7729	105
chr1	135942576	135942816	Project004-IPSHOCH-Exp5-ChIP-NPC-CTCF-IP-Blobel-Rep2-S1_S8_peakcall_MACS2_rendition_1E-8_downsampled_try3_peak_1164	598	21.0811	59.8822	56.0741	121
chr1	135945440	135945659	Project004-IPSHOCH-Exp5-ChIP-NPC-CTCF-IP-Blobel-Rep2-S1_S8_peakcall_MACS2_rendition_1E-8_downsampled_try3_peak_1165	640	25.9411	64.0137	60.1027	97
chr1	135949842	135950109	Project004-IPSHOCH-Exp5-ChIP-NPC-CTCF-IP-Blobel-Rep2-S1_S8_peakcall_MACS2_rendition_1E-8_downsampled_try3_peak_1166	1039	38.6538	103.901	98.9683	145
chr1	135957930	135958056	Project004-IPSHOCH-Exp5-ChIP-NPC-CTCF-IP-Blobel-Rep2-S1_S8_peakcall_MACS2_rendition_1E-8_downsampled_try3_peak_1167	188	10.0391	18.8641	15.9611	54
chr1	136003456	136003636	Project004-IPSHOCH-Exp5-ChIP-NPC-CTCF-IP-Blobel-Rep2-S1_S8_peakcall_MACS2_rendition_1E-8_downsampled_try3_peak_1168	507	18.6486	50.7125	47.1216	99
chr1	136016825	136017059	Project004-IPSHOCH-Exp5-ChIP-NPC-CTCF-IP-Blobel-Rep2-S1_S8_peakcall_MACS2_rendition_1E-8_downsampled_try3_peak_1169	538	16.875	53.8102	50.1444	127
chr1	136018879	136019077	Project004-IPSHOCH-Exp5-ChIP-NPC-CTCF-IP-Blobel-Rep2-S1_S8_peakcall_MACS2_rendition_1E-8_downsampled_try3_peak_1170	337	16.2457	33.7226	30.5085	80
chr1	136048273	136048538	Project004-IPSHOCH-Exp5-ChIP-NPC-CTCF-IP-Blobel-Rep2-S1_S8_peakcall_MACS2_rendition_1E-8_downsampled_try3_peak_1171	631	16.7797	63.1445	59.2529	127
chr1	136051305	136051525	Project004-IPSHOCH-Exp5-ChIP-NPC-CTCF-IP-Blobel-Rep2-S1_S8_peakcall_MACS2_rendition_1E-8_downsampled_try3_peak_1172	292	14.3504	29.2993	26.1796	71
chr1	136093109	136093379	Project004-IPSHOCH-Exp5-ChIP-NPC-CTCF-IP-Blobel-Rep2-S1_S8_peakcall_MACS2_rendition_1E-8_downsampled_try3_peak_1173	604	24.8372	60.4974	56.6746	112
chr1	136098756	136098883	Project004-IPSHOCH-Exp5-ChIP-NPC-CTCF-IP-Blobel-Rep2-S1_S8_peakcall_MACS2_rendition_1E-8_downsampled_try3_peak_1174	186	10.4437	18.6335	15.7332	57
chr1	136140811	136141106	Project004-IPSHOCH-Exp5-ChIP-NPC-CTCF-IP-Blobel-Rep2-S1_S8_peakcall_MACS2_rendition_1E-8_downsampled_try3_peak_1175	1046	31.5781	104.66	99.711	166
chr1	136228475	136228807	Project004-IPSHOCH-Exp5-ChIP-NPC-CTCF-IP-Blobel-Rep2-S1_S8_peakcall_MACS2_rendition_1E-8_downsampled_try3_peak_1176	914	34.2201	91.459	86.8206	168
chr1	136265428	136265635	Project004-IPSHOCH-Exp5-ChIP-NPC-CTCF-IP-Blobel-Rep2-S1_S8_peakcall_MACS2_rendition_1E-8_downsampled_try3_peak_1177	591	24.9488	59.1316	55.3381	95
chr1	136332117	136332254	Project004-IPSHOCH-Exp5-ChIP-NPC-CTCF-IP-Blobel-Rep2-S1_S8_peakcall_MACS2_rendition_1E-8_downsampled_try3_peak_1178	169	8.59528	16.9599	14.1041	52
chr1	136347672	136347836	Project004-IPSHOCH-Exp5-ChIP-NPC-CTCF-IP-Blobel-Rep2-S1_S8_peakcall_MACS2_rendition_1E-8_downsampled_try3_peak_1179	312	12.5286	31.238	28.0787	95
chr1	136415287	136415506	Project004-IPSHOCH-Exp5-ChIP-NPC-CTCF-IP-Blobel-Rep2-S1_S8_peakcall_MACS2_rendition_1E-8_downsampled_try3_peak_1180	501	21.9231	50.1473	46.5747	98
chr1	136500815	136500938	Project004-IPSHOCH-Exp5-ChIP-NPC-CTCF-IP-Blobel-Rep2-S1_S8_peakcall_MACS2_rendition_1E-8_downsampled_try3_peak_1181	172	9.86348	17.2368	14.3688	64
chr1	136533368	136533516	Project004-IPSHOCH-Exp5-ChIP-NPC-CTCF-IP-Blobel-Rep2-S1_S8_peakcall_MACS2_rendition_1E-8_downsampled_try3_peak_1182	191	9.32432	19.1965	16.2856	71
chr1	136535166	136535382	Project004-IPSHOCH-Exp5-ChIP-NPC-CTCF-IP-Blobel-Rep2-S1_S8_peakcall_MACS2_rendition_1E-8_downsampled_try3_peak_1183	484	21.3462	48.4326	44.9012	120
chr1	136538189	136538380	Project004-IPSHOCH-Exp5-ChIP-NPC-CTCF-IP-Blobel-Rep2-S1_S8_peakcall_MACS2_rendition_1E-8_downsampled_try3_peak_1184	273	13.8461	27.331	24.2518	83
chr1	136601569	136601762	Project004-IPSHOCH-Exp5-ChIP-NPC-CTCF-IP-Blobel-Rep2-S1_S8_peakcall_MACS2_rendition_1E-8_downsampled_try3_peak_1185	376	13.125	37.6986	34.3994	83
chr1	136621967	136622090	Project004-IPSHOCH-Exp5-ChIP-NPC-CTCF-IP-Blobel-Rep2-S1_S8_peakcall_MACS2_rendition_1E-8_downsampled_try3_peak_1186	216	10.1351	21.6442	18.6794	62
chr1	136642350	136642501	Project004-IPSHOCH-Exp5-ChIP-NPC-CTCF-IP-Blobel-Rep2-S1_S8_peakcall_MACS2_rendition_1E-8_downsampled_try3_peak_1187	186	10.4437	18.6335	15.7332	66
chr1	136726235	136726422	Project004-IPSHOCH-Exp5-ChIP-NPC-CTCF-IP-Blobel-Rep2-S1_S8_peakcall_MACS2_rendition_1E-8_downsampled_try3_peak_1188	351	11.1864	35.1054	31.869	97
chr1	136750989	136751218	Project004-IPSHOCH-Exp5-ChIP-NPC-CTCF-IP-Blobel-Rep2-S1_S8_peakcall_MACS2_rendition_1E-8_downsampled_try3_peak_1189	496	15.9375	49.6638	46.1027	130
chr1	136857333	136857521	Project004-IPSHOCH-Exp5-ChIP-NPC-CTCF-IP-Blobel-Rep2-S1_S8_peakcall_MACS2_rendition_1E-8_downsampled_try3_peak_1190	376	13.125	37.6986	34.3994	82
chr1	136869599	136869726	Project004-IPSHOCH-Exp5-ChIP-NPC-CTCF-IP-Blobel-Rep2-S1_S8_peakcall_MACS2_rendition_1E-8_downsampled_try3_peak_1191	124	6.25	12.4453	9.69904	44
chr1	136886050	136886245	Project004-IPSHOCH-Exp5-ChIP-NPC-CTCF-IP-Blobel-Rep2-S1_S8_peakcall_MACS2_rendition_1E-8_downsampled_try3_peak_1192	507	18.6486	50.7125	47.1216	106
chr1	137002616	137002895	Project004-IPSHOCH-Exp5-ChIP-NPC-CTCF-IP-Blobel-Rep2-S1_S8_peakcall_MACS2_rendition_1E-8_downsampled_try3_peak_1193	567	20.2703	56.7908	53.0543	95
chr1	137006733	137006994	Project004-IPSHOCH-Exp5-ChIP-NPC-CTCF-IP-Blobel-Rep2-S1_S8_peakcall_MACS2_rendition_1E-8_downsampled_try3_peak_1194	1176	39.6546	117.646	112.443	113
chr1	137009314	137009607	Project004-IPSHOCH-Exp5-ChIP-NPC-CTCF-IP-Blobel-Rep2-S1_S8_peakcall_MACS2_rendition_1E-8_downsampled_try3_peak_1195	566	22.5881	56.6523	52.9282	122
chr1	137029085	137029309	Project004-IPSHOCH-Exp5-ChIP-NPC-CTCF-IP-Blobel-Rep2-S1_S8_peakcall_MACS2_rendition_1E-8_downsampled_try3_peak_1196	551	15.2542	55.131	51.4465	101
chr1	137033152	137033389	Project004-IPSHOCH-Exp5-ChIP-NPC-CTCF-IP-Blobel-Rep2-S1_S8_peakcall_MACS2_rendition_1E-8_downsampled_try3_peak_1197	733	26.8921	73.3879	69.2227	116
chr1	137051034	137051307	Project004-IPSHOCH-Exp5-ChIP-NPC-CTCF-IP-Blobel-Rep2-S1_S8_peakcall_MACS2_rendition_1E-8_downsampled_try3_peak_1198	821	31.4604	82.1156	77.7228	122
chr1	137064170	137064338	Project004-IPSHOCH-Exp5-ChIP-NPC-CTCF-IP-Blobel-Rep2-S1_S8_peakcall_MACS2_rendition_1E-8_downsampled_try3_peak_1199	233	12.1426	23.3799	20.3798	87
chr1	137068616	137068778	Project004-IPSHOCH-Exp5-ChIP-NPC-CTCF-IP-Blobel-Rep2-S1_S8_peakcall_MACS2_rendition_1E-8_downsampled_try3_peak_1200	433	16.6216	43.3264	39.9111	66
chr1	137155660	137155972	Project004-IPSHOCH-Exp5-ChIP-NPC-CTCF-IP-Blobel-Rep2-S1_S8_peakcall_MACS2_rendition_1E-8_downsampled_try3_peak_1201	518	22.5	51.8733	48.2623	217
chr1	137264900	137265100	Project004-IPSHOCH-Exp5-ChIP-NPC-CTCF-IP-Blobel-Rep2-S1_S8_peakcall_MACS2_rendition_1E-8_downsampled_try3_peak_1202	668	22.107	66.8564	62.8666	98
chr1	137265814	137265949	Project004-IPSHOCH-Exp5-ChIP-NPC-CTCF-IP-Blobel-Rep2-S1_S8_peakcall_MACS2_rendition_1E-8_downsampled_try3_peak_1203	204	9.72973	20.4115	17.4743	58
chr1	137327086	137327255	Project004-IPSHOCH-Exp5-ChIP-NPC-CTCF-IP-Blobel-Rep2-S1_S8_peakcall_MACS2_rendition_1E-8_downsampled_try3_peak_1204	158	5.74074	15.815	12.9816	69
chr1	137357817	137357981	Project004-IPSHOCH-Exp5-ChIP-NPC-CTCF-IP-Blobel-Rep2-S1_S8_peakcall_MACS2_rendition_1E-8_downsampled_try3_peak_1205	469	20.8874	46.9358	43.434	81
chr1	137436960	137437213	Project004-IPSHOCH-Exp5-ChIP-NPC-CTCF-IP-Blobel-Rep2-S1_S8_peakcall_MACS2_rendition_1E-8_downsampled_try3_peak_1206	827	32.3077	82.7078	78.2943	98
chr1	137441407	137441610	Project004-IPSHOCH-Exp5-ChIP-NPC-CTCF-IP-Blobel-Rep2-S1_S8_peakcall_MACS2_rendition_1E-8_downsampled_try3_peak_1207	538	16.875	53.8102	50.1444	95
chr1	137567096	137567313	Project004-IPSHOCH-Exp5-ChIP-NPC-CTCF-IP-Blobel-Rep2-S1_S8_peakcall_MACS2_rendition_1E-8_downsampled_try3_peak_1208	647	15.4286	64.7295	60.7955	118
chr1	137596018	137596289	Project004-IPSHOCH-Exp5-ChIP-NPC-CTCF-IP-Blobel-Rep2-S1_S8_peakcall_MACS2_rendition_1E-8_downsampled_try3_peak_1209	890	28.3784	89.0631	84.4835	112
chr1	137597317	137597508	Project004-IPSHOCH-Exp5-ChIP-NPC-CTCF-IP-Blobel-Rep2-S1_S8_peakcall_MACS2_rendition_1E-8_downsampled_try3_peak_1210	404	15.8108	40.4434	37.0817	81
chr1	137601021	137601163	Project004-IPSHOCH-Exp5-ChIP-NPC-CTCF-IP-Blobel-Rep2-S1_S8_peakcall_MACS2_rendition_1E-8_downsampled_try3_peak_1211	185	10.3846	18.5323	15.6407	60
chr1	137616105	137616313	Project004-IPSHOCH-Exp5-ChIP-NPC-CTCF-IP-Blobel-Rep2-S1_S8_peakcall_MACS2_rendition_1E-8_downsampled_try3_peak_1212	229	11.545	22.9033	19.9138	103
chr1	137649521	137649879	Project004-IPSHOCH-Exp5-ChIP-NPC-CTCF-IP-Blobel-Rep2-S1_S8_peakcall_MACS2_rendition_1E-8_downsampled_try3_peak_1213	1171	26.1864	117.119	111.921	212
chr1	137677940	137678137	Project004-IPSHOCH-Exp5-ChIP-NPC-CTCF-IP-Blobel-Rep2-S1_S8_peakcall_MACS2_rendition_1E-8_downsampled_try3_peak_1214	692	28.0215	69.2627	65.2234	92
chr1	137684465	137684658	Project004-IPSHOCH-Exp5-ChIP-NPC-CTCF-IP-Blobel-Rep2-S1_S8_peakcall_MACS2_rendition_1E-8_downsampled_try3_peak_1215	630	21.8919	63.0066	59.1167	84
chr1	137686471	137686711	Project004-IPSHOCH-Exp5-ChIP-NPC-CTCF-IP-Blobel-Rep2-S1_S8_peakcall_MACS2_rendition_1E-8_downsampled_try3_peak_1216	733	29.4231	73.3726	69.2094	103
chr1	137707832	137708137	Project004-IPSHOCH-Exp5-ChIP-NPC-CTCF-IP-Blobel-Rep2-S1_S8_peakcall_MACS2_rendition_1E-8_downsampled_try3_peak_1217	507	18.6486	50.7125	47.1216	184
chr1	137725615	137725793	Project004-IPSHOCH-Exp5-ChIP-NPC-CTCF-IP-Blobel-Rep2-S1_S8_peakcall_MACS2_rendition_1E-8_downsampled_try3_peak_1218	228	12.1154	22.8408	19.8579	73
chr1	137743746	137744183	Project004-IPSHOCH-Exp5-ChIP-NPC-CTCF-IP-Blobel-Rep2-S1_S8_peakcall_MACS2_rendition_1E-8_downsampled_try3_peak_1219	277	10.625	27.7551	24.6665	83
chr1	137747366	137747580	Project004-IPSHOCH-Exp5-ChIP-NPC-CTCF-IP-Blobel-Rep2-S1_S8_peakcall_MACS2_rendition_1E-8_downsampled_try3_peak_1220	281	9.66102	28.1988	25.0979	103
chr1	137762162	137762417	Project004-IPSHOCH-Exp5-ChIP-NPC-CTCF-IP-Blobel-Rep2-S1_S8_peakcall_MACS2_rendition_1E-8_downsampled_try3_peak_1221	890	28.3784	89.0631	84.4835	124
chr1	137779370	137779603	Project004-IPSHOCH-Exp5-ChIP-NPC-CTCF-IP-Blobel-Rep2-S1_S8_peakcall_MACS2_rendition_1E-8_downsampled_try3_peak_1222	442	14.6875	44.2539	40.8143	136
chr1	137841445	137841665	Project004-IPSHOCH-Exp5-ChIP-NPC-CTCF-IP-Blobel-Rep2-S1_S8_peakcall_MACS2_rendition_1E-8_downsampled_try3_peak_1223	884	34.0385	88.4024	83.8446	115
chr1	137842298	137842534	Project004-IPSHOCH-Exp5-ChIP-NPC-CTCF-IP-Blobel-Rep2-S1_S8_peakcall_MACS2_rendition_1E-8_downsampled_try3_peak_1224	598	21.0811	59.8822	56.0741	141
chr1	137855153	137855348	Project004-IPSHOCH-Exp5-ChIP-NPC-CTCF-IP-Blobel-Rep2-S1_S8_peakcall_MACS2_rendition_1E-8_downsampled_try3_peak_1225	433	19.6154	43.3592	39.9395	92
chr1	137942423	137942662	Project004-IPSHOCH-Exp5-ChIP-NPC-CTCF-IP-Blobel-Rep2-S1_S8_peakcall_MACS2_rendition_1E-8_downsampled_try3_peak_1226	436	12.9661	43.6039	40.174	116
chr1	137944101	137944270	Project004-IPSHOCH-Exp5-ChIP-NPC-CTCF-IP-Blobel-Rep2-S1_S8_peakcall_MACS2_rendition_1E-8_downsampled_try3_peak_1227	259	13.3447	25.9459	22.8918	66
chr1	137948143	137948342	Project004-IPSHOCH-Exp5-ChIP-NPC-CTCF-IP-Blobel-Rep2-S1_S8_peakcall_MACS2_rendition_1E-8_downsampled_try3_peak_1228	715	28.8462	71.5302	67.4151	99
chr1	137972754	137972996	Project004-IPSHOCH-Exp5-ChIP-NPC-CTCF-IP-Blobel-Rep2-S1_S8_peakcall_MACS2_rendition_1E-8_downsampled_try3_peak_1229	868	33.6519	86.8316	82.3089	122
chr1	138012792	138013028	Project004-IPSHOCH-Exp5-ChIP-NPC-CTCF-IP-Blobel-Rep2-S1_S8_peakcall_MACS2_rendition_1E-8_downsampled_try3_peak_1230	583	20.6757	58.3323	54.5591	114
chr1	138064358	138064527	Project004-IPSHOCH-Exp5-ChIP-NPC-CTCF-IP-Blobel-Rep2-S1_S8_peakcall_MACS2_rendition_1E-8_downsampled_try3_peak_1231	435	19.727	43.5538	40.1273	93
chr1	138066809	138067023	Project004-IPSHOCH-Exp5-ChIP-NPC-CTCF-IP-Blobel-Rep2-S1_S8_peakcall_MACS2_rendition_1E-8_downsampled_try3_peak_1232	623	18.75	62.3143	58.4451	91
chr1	138071812	138072050	Project004-IPSHOCH-Exp5-ChIP-NPC-CTCF-IP-Blobel-Rep2-S1_S8_peakcall_MACS2_rendition_1E-8_downsampled_try3_peak_1233	307	12.973	30.7148	27.5609	119
chr1	138109509	138109710	Project004-IPSHOCH-Exp5-ChIP-NPC-CTCF-IP-Blobel-Rep2-S1_S8_peakcall_MACS2_rendition_1E-8_downsampled_try3_peak_1234	500	21.0305	50.0855	46.518	114
chr1	138186512	138186671	Project004-IPSHOCH-Exp5-ChIP-NPC-CTCF-IP-Blobel-Rep2-S1_S8_peakcall_MACS2_rendition_1E-8_downsampled_try3_peak_1235	213	11.5385	21.3832	18.4295	87
chr1	138203112	138203296	Project004-IPSHOCH-Exp5-ChIP-NPC-CTCF-IP-Blobel-Rep2-S1_S8_peakcall_MACS2_rendition_1E-8_downsampled_try3_peak_1236	381	16.9483	38.1167	34.8141	89
chr1	138355563	138355783	Project004-IPSHOCH-Exp5-ChIP-NPC-CTCF-IP-Blobel-Rep2-S1_S8_peakcall_MACS2_rendition_1E-8_downsampled_try3_peak_1237	510	16.25	51.0377	47.4406	113
chr1	138418024	138418193	Project004-IPSHOCH-Exp5-ChIP-NPC-CTCF-IP-Blobel-Rep2-S1_S8_peakcall_MACS2_rendition_1E-8_downsampled_try3_peak_1238	253	10	25.3882	22.3512	59
chr1	138421598	138421833	Project004-IPSHOCH-Exp5-ChIP-NPC-CTCF-IP-Blobel-Rep2-S1_S8_peakcall_MACS2_rendition_1E-8_downsampled_try3_peak_1239	507	18.6486	50.7125	47.1216	112
chr1	138447509	138447818	Project004-IPSHOCH-Exp5-ChIP-NPC-CTCF-IP-Blobel-Rep2-S1_S8_peakcall_MACS2_rendition_1E-8_downsampled_try3_peak_1240	897	32.1253	89.7453	85.1506	144
chr1	138452634	138452773	Project004-IPSHOCH-Exp5-ChIP-NPC-CTCF-IP-Blobel-Rep2-S1_S8_peakcall_MACS2_rendition_1E-8_downsampled_try3_peak_1241	164	9.38293	16.423	13.5789	89
chr1	138622814	138623029	Project004-IPSHOCH-Exp5-ChIP-NPC-CTCF-IP-Blobel-Rep2-S1_S8_peakcall_MACS2_rendition_1E-8_downsampled_try3_peak_1242	267	11.7568	26.7382	23.6677	117
chr1	138636203	138636413	Project004-IPSHOCH-Exp5-ChIP-NPC-CTCF-IP-Blobel-Rep2-S1_S8_peakcall_MACS2_rendition_1E-8_downsampled_try3_peak_1243	321	15.6655	32.1345	28.9516	95
chr1	138645861	138646013	Project004-IPSHOCH-Exp5-ChIP-NPC-CTCF-IP-Blobel-Rep2-S1_S8_peakcall_MACS2_rendition_1E-8_downsampled_try3_peak_1244	351	15.1892	35.1508	31.9102	88
chr1	139014575	139014698	Project004-IPSHOCH-Exp5-ChIP-NPC-CTCF-IP-Blobel-Rep2-S1_S8_peakcall_MACS2_rendition_1E-8_downsampled_try3_peak_1245	123	6.89189	12.3237	9.58027	72
chr1	139122098	139122436	Project004-IPSHOCH-Exp5-ChIP-NPC-CTCF-IP-Blobel-Rep2-S1_S8_peakcall_MACS2_rendition_1E-8_downsampled_try3_peak_1246	990	36.4279	99.0595	94.2372	171
chr1	139227285	139227454	Project004-IPSHOCH-Exp5-ChIP-NPC-CTCF-IP-Blobel-Rep2-S1_S8_peakcall_MACS2_rendition_1E-8_downsampled_try3_peak_1247	392	16.8075	39.2675	35.9351	79
chr1	139228639	139228789	Project004-IPSHOCH-Exp5-ChIP-NPC-CTCF-IP-Blobel-Rep2-S1_S8_peakcall_MACS2_rendition_1E-8_downsampled_try3_peak_1248	301	12.6312	30.1245	26.9914	73
chr1	139843378	139843501	Project004-IPSHOCH-Exp5-ChIP-NPC-CTCF-IP-Blobel-Rep2-S1_S8_peakcall_MACS2_rendition_1E-8_downsampled_try3_peak_1249	116	7.35835	11.6028	8.88439	85
chr1	139941262	139941433	Project004-IPSHOCH-Exp5-ChIP-NPC-CTCF-IP-Blobel-Rep2-S1_S8_peakcall_MACS2_rendition_1E-8_downsampled_try3_peak_1250	550	21.1728	55.058	51.377	78
chr1	139982464	139982654	Project004-IPSHOCH-Exp5-ChIP-NPC-CTCF-IP-Blobel-Rep2-S1_S8_peakcall_MACS2_rendition_1E-8_downsampled_try3_peak_1251	395	16.57	39.5764	36.2422	104
chr1	140026834	140026988	Project004-IPSHOCH-Exp5-ChIP-NPC-CTCF-IP-Blobel-Rep2-S1_S8_peakcall_MACS2_rendition_1E-8_downsampled_try3_peak_1252	147	6.35593	14.7288	11.9194	52
chr1	140315240	140315407	Project004-IPSHOCH-Exp5-ChIP-NPC-CTCF-IP-Blobel-Rep2-S1_S8_peakcall_MACS2_rendition_1E-8_downsampled_try3_peak_1253	158	9.28328	15.8647	13.0259	91
chr1	140454941	140455167	Project004-IPSHOCH-Exp5-ChIP-NPC-CTCF-IP-Blobel-Rep2-S1_S8_peakcall_MACS2_rendition_1E-8_downsampled_try3_peak_1254	124	6.25	12.4453	9.69904	105
chr1	140516725	140516901	Project004-IPSHOCH-Exp5-ChIP-NPC-CTCF-IP-Blobel-Rep2-S1_S8_peakcall_MACS2_rendition_1E-8_downsampled_try3_peak_1255	217	10.8568	21.7591	18.7932	68
chr1	140534577	140534711	Project004-IPSHOCH-Exp5-ChIP-NPC-CTCF-IP-Blobel-Rep2-S1_S8_peakcall_MACS2_rendition_1E-8_downsampled_try3_peak_1256	196	10.5152	19.6547	16.7388	61
chr1	140599903	140600096	Project004-IPSHOCH-Exp5-ChIP-NPC-CTCF-IP-Blobel-Rep2-S1_S8_peakcall_MACS2_rendition_1E-8_downsampled_try3_peak_1257	101	4.71429	10.1544	7.484	148
chr1	140649024	140649231	Project004-IPSHOCH-Exp5-ChIP-NPC-CTCF-IP-Blobel-Rep2-S1_S8_peakcall_MACS2_rendition_1E-8_downsampled_try3_peak_1258	606	25.3846	60.6627	56.8336	101
chr1	140732003	140732209	Project004-IPSHOCH-Exp5-ChIP-NPC-CTCF-IP-Blobel-Rep2-S1_S8_peakcall_MACS2_rendition_1E-8_downsampled_try3_peak_1259	359	16.0626	35.9467	32.6906	93
chr1	140752793	140752925	Project004-IPSHOCH-Exp5-ChIP-NPC-CTCF-IP-Blobel-Rep2-S1_S8_peakcall_MACS2_rendition_1E-8_downsampled_try3_peak_1260	151	8.831	15.1008	12.2865	84
chr1	141052938	141053253	Project004-IPSHOCH-Exp5-ChIP-NPC-CTCF-IP-Blobel-Rep2-S1_S8_peakcall_MACS2_rendition_1E-8_downsampled_try3_peak_1261	510	16.25	51.0377	47.4406	226
chr1	141058347	141058486	Project004-IPSHOCH-Exp5-ChIP-NPC-CTCF-IP-Blobel-Rep2-S1_S8_peakcall_MACS2_rendition_1E-8_downsampled_try3_peak_1262	171	9.80769	17.1414	14.2785	68
chr1	141059497	141059655	Project004-IPSHOCH-Exp5-ChIP-NPC-CTCF-IP-Blobel-Rep2-S1_S8_peakcall_MACS2_rendition_1E-8_downsampled_try3_peak_1263	191	9.32432	19.1965	16.2856	63
chr1	141164527	141164719	Project004-IPSHOCH-Exp5-ChIP-NPC-CTCF-IP-Blobel-Rep2-S1_S8_peakcall_MACS2_rendition_1E-8_downsampled_try3_peak_1264	333	9.85714	33.3413	30.1428	101
chr1	141210923	141211155	Project004-IPSHOCH-Exp5-ChIP-NPC-CTCF-IP-Blobel-Rep2-S1_S8_peakcall_MACS2_rendition_1E-8_downsampled_try3_peak_1265	482	15.625	48.2983	44.7729	100
chr1	141237160	141237308	Project004-IPSHOCH-Exp5-ChIP-NPC-CTCF-IP-Blobel-Rep2-S1_S8_peakcall_MACS2_rendition_1E-8_downsampled_try3_peak_1266	273	13.8461	27.331	24.2518	95
chr1	141318432	141318646	Project004-IPSHOCH-Exp5-ChIP-NPC-CTCF-IP-Blobel-Rep2-S1_S8_peakcall_MACS2_rendition_1E-8_downsampled_try3_peak_1267	267	11.7568	26.7382	23.6677	89
chr1	141335104	141335236	Project004-IPSHOCH-Exp5-ChIP-NPC-CTCF-IP-Blobel-Rep2-S1_S8_peakcall_MACS2_rendition_1E-8_downsampled_try3_peak_1268	124	6.95809	12.4332	9.68931	52
chr1	142068238	142068379	Project004-IPSHOCH-Exp5-ChIP-NPC-CTCF-IP-Blobel-Rep2-S1_S8_peakcall_MACS2_rendition_1E-8_downsampled_try3_peak_1269	128	5.84746	12.8808	10.1276	99
chr1	142428172	142428415	Project004-IPSHOCH-Exp5-ChIP-NPC-CTCF-IP-Blobel-Rep2-S1_S8_peakcall_MACS2_rendition_1E-8_downsampled_try3_peak_1270	696	28.2692	69.6964	65.6335	155
chr1	142445387	142445574	Project004-IPSHOCH-Exp5-ChIP-NPC-CTCF-IP-Blobel-Rep2-S1_S8_peakcall_MACS2_rendition_1E-8_downsampled_try3_peak_1271	158	9.28328	15.8647	13.0259	101
chr1	142558095	142558242	Project004-IPSHOCH-Exp5-ChIP-NPC-CTCF-IP-Blobel-Rep2-S1_S8_peakcall_MACS2_rendition_1E-8_downsampled_try3_peak_1272	216	10.1351	21.6442	18.6794	89
chr1	143858415	143858622	Project004-IPSHOCH-Exp5-ChIP-NPC-CTCF-IP-Blobel-Rep2-S1_S8_peakcall_MACS2_rendition_1E-8_downsampled_try3_peak_1273	228	10.5405	22.8938	19.9053	99
chr1	144638999	144639194	Project004-IPSHOCH-Exp5-ChIP-NPC-CTCF-IP-Blobel-Rep2-S1_S8_peakcall_MACS2_rendition_1E-8_downsampled_try3_peak_1274	387	17.3502	38.7969	35.4789	95
chr1	145491476	145491639	Project004-IPSHOCH-Exp5-ChIP-NPC-CTCF-IP-Blobel-Rep2-S1_S8_peakcall_MACS2_rendition_1E-8_downsampled_try3_peak_1275	376	13.125	37.6986	34.3994	89
chr1	145549885	145550255	Project004-IPSHOCH-Exp5-ChIP-NPC-CTCF-IP-Blobel-Rep2-S1_S8_peakcall_MACS2_rendition_1E-8_downsampled_try3_peak_1276	1073	37.8549	107.398	102.398	146
chr1	145624200	145624397	Project004-IPSHOCH-Exp5-ChIP-NPC-CTCF-IP-Blobel-Rep2-S1_S8_peakcall_MACS2_rendition_1E-8_downsampled_try3_peak_1277	666	19.6875	66.6649	62.679	103
chr1	145636079	145636275	Project004-IPSHOCH-Exp5-ChIP-NPC-CTCF-IP-Blobel-Rep2-S1_S8_peakcall_MACS2_rendition_1E-8_downsampled_try3_peak_1278	270	9.40678	27.0855	24.0124	83
chr1	145650793	145650931	Project004-IPSHOCH-Exp5-ChIP-NPC-CTCF-IP-Blobel-Rep2-S1_S8_peakcall_MACS2_rendition_1E-8_downsampled_try3_peak_1279	163	9.07633	16.3429	13.5008	69
chr1	145661108	145661345	Project004-IPSHOCH-Exp5-ChIP-NPC-CTCF-IP-Blobel-Rep2-S1_S8_peakcall_MACS2_rendition_1E-8_downsampled_try3_peak_1280	386	11.9491	38.6933	35.377	137
chr1	145853831	145854063	Project004-IPSHOCH-Exp5-ChIP-NPC-CTCF-IP-Blobel-Rep2-S1_S8_peakcall_MACS2_rendition_1E-8_downsampled_try3_peak_1281	423	12.7119	42.3632	38.9638	120
chr1	146044837	146045129	Project004-IPSHOCH-Exp5-ChIP-NPC-CTCF-IP-Blobel-Rep2-S1_S8_peakcall_MACS2_rendition_1E-8_downsampled_try3_peak_1282	374	11.6949	37.4879	34.1992	136
chr1	146090740	146090961	Project004-IPSHOCH-Exp5-ChIP-NPC-CTCF-IP-Blobel-Rep2-S1_S8_peakcall_MACS2_rendition_1E-8_downsampled_try3_peak_1283	256	12.5489	25.6897	22.6451	82
chr1	146200597	146200748	Project004-IPSHOCH-Exp5-ChIP-NPC-CTCF-IP-Blobel-Rep2-S1_S8_peakcall_MACS2_rendition_1E-8_downsampled_try3_peak_1284	191	10.4868	19.1402	16.2346	54
chr1	146227264	146227428	Project004-IPSHOCH-Exp5-ChIP-NPC-CTCF-IP-Blobel-Rep2-S1_S8_peakcall_MACS2_rendition_1E-8_downsampled_try3_peak_1285	320	13.3784	32.0676	28.8888	82
chr1	146253829	146254087	Project004-IPSHOCH-Exp5-ChIP-NPC-CTCF-IP-Blobel-Rep2-S1_S8_peakcall_MACS2_rendition_1E-8_downsampled_try3_peak_1286	577	15.7627	57.7747	54.02	103
chr1	146278691	146278916	Project004-IPSHOCH-Exp5-ChIP-NPC-CTCF-IP-Blobel-Rep2-S1_S8_peakcall_MACS2_rendition_1E-8_downsampled_try3_peak_1287	484	21.3462	48.4326	44.9012	112
chr1	146551650	146551773	Project004-IPSHOCH-Exp5-ChIP-NPC-CTCF-IP-Blobel-Rep2-S1_S8_peakcall_MACS2_rendition_1E-8_downsampled_try3_peak_1288	186	10.4437	18.6335	15.7332	71
chr1	149070454	149070665	Project004-IPSHOCH-Exp5-ChIP-NPC-CTCF-IP-Blobel-Rep2-S1_S8_peakcall_MACS2_rendition_1E-8_downsampled_try3_peak_1289	158	9.28328	15.8647	13.0259	122
chr1	150840793	150841032	Project004-IPSHOCH-Exp5-ChIP-NPC-CTCF-IP-Blobel-Rep2-S1_S8_peakcall_MACS2_rendition_1E-8_downsampled_try3_peak_1290	503	22.0478	50.3653	46.7833	122
chr1	151101368	151101589	Project004-IPSHOCH-Exp5-ChIP-NPC-CTCF-IP-Blobel-Rep2-S1_S8_peakcall_MACS2_rendition_1E-8_downsampled_try3_peak_1291	280	12.1622	28.0497	24.9519	103
chr1	151605672	151605960	Project004-IPSHOCH-Exp5-ChIP-NPC-CTCF-IP-Blobel-Rep2-S1_S8_peakcall_MACS2_rendition_1E-8_downsampled_try3_peak_1292	660	27.1154	66.0553	62.0933	142
chr1	151656803	151656966	Project004-IPSHOCH-Exp5-ChIP-NPC-CTCF-IP-Blobel-Rep2-S1_S8_peakcall_MACS2_rendition_1E-8_downsampled_try3_peak_1293	321	15.6655	32.1345	28.9516	108
chr1	151680162	151680323	Project004-IPSHOCH-Exp5-ChIP-NPC-CTCF-IP-Blobel-Rep2-S1_S8_peakcall_MACS2_rendition_1E-8_downsampled_try3_peak_1294	337	14.7289	33.7009	30.4908	85
chr1	151703908	151704094	Project004-IPSHOCH-Exp5-ChIP-NPC-CTCF-IP-Blobel-Rep2-S1_S8_peakcall_MACS2_rendition_1E-8_downsampled_try3_peak_1295	265	10.3125	26.5652	23.5028	105
chr1	152113739	152113982	Project004-IPSHOCH-Exp5-ChIP-NPC-CTCF-IP-Blobel-Rep2-S1_S8_peakcall_MACS2_rendition_1E-8_downsampled_try3_peak_1296	326	11.875	32.6367	29.4451	103
chr1	152154831	152155058	Project004-IPSHOCH-Exp5-ChIP-NPC-CTCF-IP-Blobel-Rep2-S1_S8_peakcall_MACS2_rendition_1E-8_downsampled_try3_peak_1297	433	16.6216	43.3264	39.9111	114
chr1	152220162	152220337	Project004-IPSHOCH-Exp5-ChIP-NPC-CTCF-IP-Blobel-Rep2-S1_S8_peakcall_MACS2_rendition_1E-8_downsampled_try3_peak_1298	238	12.0925	23.8179	20.8126	80
chr1	152240066	152240375	Project004-IPSHOCH-Exp5-ChIP-NPC-CTCF-IP-Blobel-Rep2-S1_S8_peakcall_MACS2_rendition_1E-8_downsampled_try3_peak_1299	652	19.375	65.2077	61.2614	158
chr1	152317906	152318076	Project004-IPSHOCH-Exp5-ChIP-NPC-CTCF-IP-Blobel-Rep2-S1_S8_peakcall_MACS2_rendition_1E-8_downsampled_try3_peak_1300	229	11.545	22.9033	19.9138	92
chr1	152344945	152345088	Project004-IPSHOCH-Exp5-ChIP-NPC-CTCF-IP-Blobel-Rep2-S1_S8_peakcall_MACS2_rendition_1E-8_downsampled_try3_peak_1301	228	12.1154	22.8408	19.8579	51
chr1	152387443	152387677	Project004-IPSHOCH-Exp5-ChIP-NPC-CTCF-IP-Blobel-Rep2-S1_S8_peakcall_MACS2_rendition_1E-8_downsampled_try3_peak_1302	715	28.8462	71.5302	67.4151	120
chr1	152438386	152438659	Project004-IPSHOCH-Exp5-ChIP-NPC-CTCF-IP-Blobel-Rep2-S1_S8_peakcall_MACS2_rendition_1E-8_downsampled_try3_peak_1303	403	17.8759	40.3736	37.0188	166
chr1	152479728	152479857	Project004-IPSHOCH-Exp5-ChIP-NPC-CTCF-IP-Blobel-Rep2-S1_S8_peakcall_MACS2_rendition_1E-8_downsampled_try3_peak_1304	158	9.28328	15.8647	13.0259	69
chr1	152627179	152627313	Project004-IPSHOCH-Exp5-ChIP-NPC-CTCF-IP-Blobel-Rep2-S1_S8_peakcall_MACS2_rendition_1E-8_downsampled_try3_peak_1305	208	8.75	20.8176	17.8726	80
chr1	152767502	152767727	Project004-IPSHOCH-Exp5-ChIP-NPC-CTCF-IP-Blobel-Rep2-S1_S8_peakcall_MACS2_rendition_1E-8_downsampled_try3_peak_1306	433	16.6216	43.3264	39.9111	119
chr1	152840929	152841124	Project004-IPSHOCH-Exp5-ChIP-NPC-CTCF-IP-Blobel-Rep2-S1_S8_peakcall_MACS2_rendition_1E-8_downsampled_try3_peak_1307	206	9.52889	20.6059	17.6664	86
chr1	152856598	152856896	Project004-IPSHOCH-Exp5-ChIP-NPC-CTCF-IP-Blobel-Rep2-S1_S8_peakcall_MACS2_rendition_1E-8_downsampled_try3_peak_1308	216	8.13559	21.6982	18.7324	167
chr1	152858205	152858398	Project004-IPSHOCH-Exp5-ChIP-NPC-CTCF-IP-Blobel-Rep2-S1_S8_peakcall_MACS2_rendition_1E-8_downsampled_try3_peak_1309	376	15	37.6044	34.309	99
chr1	152882175	152882406	Project004-IPSHOCH-Exp5-ChIP-NPC-CTCF-IP-Blobel-Rep2-S1_S8_peakcall_MACS2_rendition_1E-8_downsampled_try3_peak_1310	496	12.8571	49.6294	46.0724	118
chr1	152926073	152926326	Project004-IPSHOCH-Exp5-ChIP-NPC-CTCF-IP-Blobel-Rep2-S1_S8_peakcall_MACS2_rendition_1E-8_downsampled_try3_peak_1311	627	26.1092	62.7096	58.8287	161
chr1	153237275	153237473	Project004-IPSHOCH-Exp5-ChIP-NPC-CTCF-IP-Blobel-Rep2-S1_S8_peakcall_MACS2_rendition_1E-8_downsampled_try3_peak_1312	435	19.727	43.5538	40.1273	95
chr1	153308543	153308669	Project004-IPSHOCH-Exp5-ChIP-NPC-CTCF-IP-Blobel-Rep2-S1_S8_peakcall_MACS2_rendition_1E-8_downsampled_try3_peak_1313	214	11.6041	21.496	18.5379	72
chr1	153411587	153411883	Project004-IPSHOCH-Exp5-ChIP-NPC-CTCF-IP-Blobel-Rep2-S1_S8_peakcall_MACS2_rendition_1E-8_downsampled_try3_peak_1314	723	27.8654	72.3894	68.2587	102
chr1	153553330	153553549	Project004-IPSHOCH-Exp5-ChIP-NPC-CTCF-IP-Blobel-Rep2-S1_S8_peakcall_MACS2_rendition_1E-8_downsampled_try3_peak_1315	510	16.25	51.0377	47.4406	80
chr1	153563623	153563781	Project004-IPSHOCH-Exp5-ChIP-NPC-CTCF-IP-Blobel-Rep2-S1_S8_peakcall_MACS2_rendition_1E-8_downsampled_try3_peak_1316	244	12.7645	24.4431	21.4178	89
chr1	153667655	153667962	Project004-IPSHOCH-Exp5-ChIP-NPC-CTCF-IP-Blobel-Rep2-S1_S8_peakcall_MACS2_rendition_1E-8_downsampled_try3_peak_1317	846	23.4375	84.6556	80.1894	107
chr1	154127277	154127465	Project004-IPSHOCH-Exp5-ChIP-NPC-CTCF-IP-Blobel-Rep2-S1_S8_peakcall_MACS2_rendition_1E-8_downsampled_try3_peak_1318	462	17.8496	46.2069	42.7291	69
chr1	154138027	154138174	Project004-IPSHOCH-Exp5-ChIP-NPC-CTCF-IP-Blobel-Rep2-S1_S8_peakcall_MACS2_rendition_1E-8_downsampled_try3_peak_1319	216	10.1351	21.6442	18.6794	70
chr1	154216375	154216672	Project004-IPSHOCH-Exp5-ChIP-NPC-CTCF-IP-Blobel-Rep2-S1_S8_peakcall_MACS2_rendition_1E-8_downsampled_try3_peak_1320	779	30.5655	77.9204	73.6346	126
chr1	154358438	154358699	Project004-IPSHOCH-Exp5-ChIP-NPC-CTCF-IP-Blobel-Rep2-S1_S8_peakcall_MACS2_rendition_1E-8_downsampled_try3_peak_1321	390	15.4054	39.0183	35.6872	152
chr1	154368000	154368182	Project004-IPSHOCH-Exp5-ChIP-NPC-CTCF-IP-Blobel-Rep2-S1_S8_peakcall_MACS2_rendition_1E-8_downsampled_try3_peak_1322	376	13.125	37.6986	34.3994	90
chr1	154372185	154372437	Project004-IPSHOCH-Exp5-ChIP-NPC-CTCF-IP-Blobel-Rep2-S1_S8_peakcall_MACS2_rendition_1E-8_downsampled_try3_peak_1323	474	18.5611	47.4271	43.9155	104
chr1	154593692	154593896	Project004-IPSHOCH-Exp5-ChIP-NPC-CTCF-IP-Blobel-Rep2-S1_S8_peakcall_MACS2_rendition_1E-8_downsampled_try3_peak_1324	522	19.0541	52.2186	48.5899	103
chr1	154615386	154615569	Project004-IPSHOCH-Exp5-ChIP-NPC-CTCF-IP-Blobel-Rep2-S1_S8_peakcall_MACS2_rendition_1E-8_downsampled_try3_peak_1325	258	8.35714	25.8538	22.8039	85
chr1	154626258	154626537	Project004-IPSHOCH-Exp5-ChIP-NPC-CTCF-IP-Blobel-Rep2-S1_S8_peakcall_MACS2_rendition_1E-8_downsampled_try3_peak_1326	1042	38.8737	104.288	99.3483	117
chr1	154637392	154637645	Project004-IPSHOCH-Exp5-ChIP-NPC-CTCF-IP-Blobel-Rep2-S1_S8_peakcall_MACS2_rendition_1E-8_downsampled_try3_peak_1327	241	10.9459	24.1597	21.1477	93
chr1	154662375	154662499	Project004-IPSHOCH-Exp5-ChIP-NPC-CTCF-IP-Blobel-Rep2-S1_S8_peakcall_MACS2_rendition_1E-8_downsampled_try3_peak_1328	195	10.7545	19.5932	16.6798	61
chr1	154751822	154751947	Project004-IPSHOCH-Exp5-ChIP-NPC-CTCF-IP-Blobel-Rep2-S1_S8_peakcall_MACS2_rendition_1E-8_downsampled_try3_peak_1329	134	6.5625	13.4274	10.65	95
chr1	154882712	154882891	Project004-IPSHOCH-Exp5-ChIP-NPC-CTCF-IP-Blobel-Rep2-S1_S8_peakcall_MACS2_rendition_1E-8_downsampled_try3_peak_1330	513	22.1883	51.3304	47.7313	86
chr1	154885062	154885187	Project004-IPSHOCH-Exp5-ChIP-NPC-CTCF-IP-Blobel-Rep2-S1_S8_peakcall_MACS2_rendition_1E-8_downsampled_try3_peak_1331	154	7.1875	15.4506	12.6326	36
chr1	154887404	154887575	Project004-IPSHOCH-Exp5-ChIP-NPC-CTCF-IP-Blobel-Rep2-S1_S8_peakcall_MACS2_rendition_1E-8_downsampled_try3_peak_1332	134	8.03893	13.4063	10.6368	116
chr1	154913572	154913698	Project004-IPSHOCH-Exp5-ChIP-NPC-CTCF-IP-Blobel-Rep2-S1_S8_peakcall_MACS2_rendition_1E-8_downsampled_try3_peak_1333	172	9.86348	17.2368	14.3688	37
chr1	154939445	154939633	Project004-IPSHOCH-Exp5-ChIP-NPC-CTCF-IP-Blobel-Rep2-S1_S8_peakcall_MACS2_rendition_1E-8_downsampled_try3_peak_1334	351	12.5	35.1463	31.9064	91
chr1	154948781	154948961	Project004-IPSHOCH-Exp5-ChIP-NPC-CTCF-IP-Blobel-Rep2-S1_S8_peakcall_MACS2_rendition_1E-8_downsampled_try3_peak_1335	418	19.1468	41.8815	38.4905	86
chr1	155233948	155234222	Project004-IPSHOCH-Exp5-ChIP-NPC-CTCF-IP-Blobel-Rep2-S1_S8_peakcall_MACS2_rendition_1E-8_downsampled_try3_peak_1336	828	25.4256	82.8236	78.407	93
chr1	155248922	155249243	Project004-IPSHOCH-Exp5-ChIP-NPC-CTCF-IP-Blobel-Rep2-S1_S8_peakcall_MACS2_rendition_1E-8_downsampled_try3_peak_1337	374	9.81481	37.402	34.1167	181
chr1	155298462	155298674	Project004-IPSHOCH-Exp5-ChIP-NPC-CTCF-IP-Blobel-Rep2-S1_S8_peakcall_MACS2_rendition_1E-8_downsampled_try3_peak_1338	645	26.6894	64.5131	60.5886	109
chr1	155327644	155327798	Project004-IPSHOCH-Exp5-ChIP-NPC-CTCF-IP-Blobel-Rep2-S1_S8_peakcall_MACS2_rendition_1E-8_downsampled_try3_peak_1339	162	8.74528	16.2543	13.4139	78
chr1	155398019	155398315	Project004-IPSHOCH-Exp5-ChIP-NPC-CTCF-IP-Blobel-Rep2-S1_S8_peakcall_MACS2_rendition_1E-8_downsampled_try3_peak_1340	467	20.7692	46.7295	43.238	121
chr1	155404079	155404335	Project004-IPSHOCH-Exp5-ChIP-NPC-CTCF-IP-Blobel-Rep2-S1_S8_peakcall_MACS2_rendition_1E-8_downsampled_try3_peak_1341	404	15.8108	40.4434	37.0817	142
chr1	155406439	155406664	Project004-IPSHOCH-Exp5-ChIP-NPC-CTCF-IP-Blobel-Rep2-S1_S8_peakcall_MACS2_rendition_1E-8_downsampled_try3_peak_1342	429	14.375	42.9238	39.517	116
chr1	155589664	155589826	Project004-IPSHOCH-Exp5-ChIP-NPC-CTCF-IP-Blobel-Rep2-S1_S8_peakcall_MACS2_rendition_1E-8_downsampled_try3_peak_1343	395	10.1852	39.5892	36.2549	82
chr1	155593941	155594212	Project004-IPSHOCH-Exp5-ChIP-NPC-CTCF-IP-Blobel-Rep2-S1_S8_peakcall_MACS2_rendition_1E-8_downsampled_try3_peak_1344	298	13.9915	29.8889	26.7589	115
chr1	155596457	155596657	Project004-IPSHOCH-Exp5-ChIP-NPC-CTCF-IP-Blobel-Rep2-S1_S8_peakcall_MACS2_rendition_1E-8_downsampled_try3_peak_1345	290	9	29.0021	25.8891	83
chr1	155654637	155654823	Project004-IPSHOCH-Exp5-ChIP-NPC-CTCF-IP-Blobel-Rep2-S1_S8_peakcall_MACS2_rendition_1E-8_downsampled_try3_peak_1346	280	12.1622	28.0497	24.9519	102
chr1	155694121	155694347	Project004-IPSHOCH-Exp5-ChIP-NPC-CTCF-IP-Blobel-Rep2-S1_S8_peakcall_MACS2_rendition_1E-8_downsampled_try3_peak_1347	274	13.9249	27.4672	24.3835	132
chr1	155742120	155742360	Project004-IPSHOCH-Exp5-ChIP-NPC-CTCF-IP-Blobel-Rep2-S1_S8_peakcall_MACS2_rendition_1E-8_downsampled_try3_peak_1348	551	20.7707	55.1868	51.5013	141
chr1	155879750	155879989	Project004-IPSHOCH-Exp5-ChIP-NPC-CTCF-IP-Blobel-Rep2-S1_S8_peakcall_MACS2_rendition_1E-8_downsampled_try3_peak_1349	518	20.2522	51.8798	48.2655	100
chr1	155923919	155924092	Project004-IPSHOCH-Exp5-ChIP-NPC-CTCF-IP-Blobel-Rep2-S1_S8_peakcall_MACS2_rendition_1E-8_downsampled_try3_peak_1350	498	18.1574	49.852	46.29	65
chr1	155965886	155966120	Project004-IPSHOCH-Exp5-ChIP-NPC-CTCF-IP-Blobel-Rep2-S1_S8_peakcall_MACS2_rendition_1E-8_downsampled_try3_peak_1351	598	22.5536	59.8947	56.0855	112
chr1	155999827	155999956	Project004-IPSHOCH-Exp5-ChIP-NPC-CTCF-IP-Blobel-Rep2-S1_S8_peakcall_MACS2_rendition_1E-8_downsampled_try3_peak_1352	172	9.86348	17.2368	14.3688	73
chr1	156028149	156028437	Project004-IPSHOCH-Exp5-ChIP-NPC-CTCF-IP-Blobel-Rep2-S1_S8_peakcall_MACS2_rendition_1E-8_downsampled_try3_peak_1353	569	20.8245	56.9262	53.1887	144
chr1	156029980	156030125	Project004-IPSHOCH-Exp5-ChIP-NPC-CTCF-IP-Blobel-Rep2-S1_S8_peakcall_MACS2_rendition_1E-8_downsampled_try3_peak_1354	184	10.347	18.468	15.5809	86
chr1	156037473	156037659	Project004-IPSHOCH-Exp5-ChIP-NPC-CTCF-IP-Blobel-Rep2-S1_S8_peakcall_MACS2_rendition_1E-8_downsampled_try3_peak_1355	402	18.5665	40.2222	36.8751	87
chr1	156086101	156086293	Project004-IPSHOCH-Exp5-ChIP-NPC-CTCF-IP-Blobel-Rep2-S1_S8_peakcall_MACS2_rendition_1E-8_downsampled_try3_peak_1356	248	12.6946	24.8328	21.8036	97
chr1	156128589	156128856	Project004-IPSHOCH-Exp5-ChIP-NPC-CTCF-IP-Blobel-Rep2-S1_S8_peakcall_MACS2_rendition_1E-8_downsampled_try3_peak_1357	752	30	75.2234	71.0118	151
chr1	156576702	156577019	Project004-IPSHOCH-Exp5-ChIP-NPC-CTCF-IP-Blobel-Rep2-S1_S8_peakcall_MACS2_rendition_1E-8_downsampled_try3_peak_1358	630	21.8919	63.0066	59.1167	207
chr1	156633353	156633708	Project004-IPSHOCH-Exp5-ChIP-NPC-CTCF-IP-Blobel-Rep2-S1_S8_peakcall_MACS2_rendition_1E-8_downsampled_try3_peak_1359	908	24.6875	90.8436	86.2143	202
chr1	156635264	156635503	Project004-IPSHOCH-Exp5-ChIP-NPC-CTCF-IP-Blobel-Rep2-S1_S8_peakcall_MACS2_rendition_1E-8_downsampled_try3_peak_1360	538	16.875	53.8102	50.1444	121
chr1	156643882	156644046	Project004-IPSHOCH-Exp5-ChIP-NPC-CTCF-IP-Blobel-Rep2-S1_S8_peakcall_MACS2_rendition_1E-8_downsampled_try3_peak_1361	177	9.93487	17.7699	14.8931	53
chr1	156853649	156854085	Project004-IPSHOCH-Exp5-ChIP-NPC-CTCF-IP-Blobel-Rep2-S1_S8_peakcall_MACS2_rendition_1E-8_downsampled_try3_peak_1362	1233	27.2034	123.343	118.034	229
chr1	156873019	156873237	Project004-IPSHOCH-Exp5-ChIP-NPC-CTCF-IP-Blobel-Rep2-S1_S8_peakcall_MACS2_rendition_1E-8_downsampled_try3_peak_1363	363	9.62963	36.3204	33.0543	104
chr1	156896089	156896386	Project004-IPSHOCH-Exp5-ChIP-NPC-CTCF-IP-Blobel-Rep2-S1_S8_peakcall_MACS2_rendition_1E-8_downsampled_try3_peak_1364	731	23.6317	73.142	68.9881	188
chr1	156987366	156987496	Project004-IPSHOCH-Exp5-ChIP-NPC-CTCF-IP-Blobel-Rep2-S1_S8_peakcall_MACS2_rendition_1E-8_downsampled_try3_peak_1365	213	11.5385	21.3832	18.4295	38
chr1	157062630	157062774	Project004-IPSHOCH-Exp5-ChIP-NPC-CTCF-IP-Blobel-Rep2-S1_S8_peakcall_MACS2_rendition_1E-8_downsampled_try3_peak_1366	209	10.9889	20.9356	17.99	86
chr1	157065434	157065612	Project004-IPSHOCH-Exp5-ChIP-NPC-CTCF-IP-Blobel-Rep2-S1_S8_peakcall_MACS2_rendition_1E-8_downsampled_try3_peak_1367	399	12.2034	39.9077	36.571	95
chr1	157071382	157071688	Project004-IPSHOCH-Exp5-ChIP-NPC-CTCF-IP-Blobel-Rep2-S1_S8_peakcall_MACS2_rendition_1E-8_downsampled_try3_peak_1368	580	17.8125	58.0283	54.2689	140
chr1	157128690	157128898	Project004-IPSHOCH-Exp5-ChIP-NPC-CTCF-IP-Blobel-Rep2-S1_S8_peakcall_MACS2_rendition_1E-8_downsampled_try3_peak_1369	236	6.18421	23.6964	20.6946	101
chr1	157140590	157140782	Project004-IPSHOCH-Exp5-ChIP-NPC-CTCF-IP-Blobel-Rep2-S1_S8_peakcall_MACS2_rendition_1E-8_downsampled_try3_peak_1370	404	15.8108	40.4434	37.0817	97
chr1	157363832	157364009	Project004-IPSHOCH-Exp5-ChIP-NPC-CTCF-IP-Blobel-Rep2-S1_S8_peakcall_MACS2_rendition_1E-8_downsampled_try3_peak_1371	270	9.40678	27.0855	24.0124	95
chr1	157384357	157384816	Project004-IPSHOCH-Exp5-ChIP-NPC-CTCF-IP-Blobel-Rep2-S1_S8_peakcall_MACS2_rendition_1E-8_downsampled_try3_peak_1372	433	16.6216	43.3264	39.9111	241
chr1	157411995	157412187	Project004-IPSHOCH-Exp5-ChIP-NPC-CTCF-IP-Blobel-Rep2-S1_S8_peakcall_MACS2_rendition_1E-8_downsampled_try3_peak_1373	428	17.2353	42.892	39.489	113
chr1	157422488	157422731	Project004-IPSHOCH-Exp5-ChIP-NPC-CTCF-IP-Blobel-Rep2-S1_S8_peakcall_MACS2_rendition_1E-8_downsampled_try3_peak_1374	538	23.2082	53.8399	50.1672	98
chr1	157423622	157423849	Project004-IPSHOCH-Exp5-ChIP-NPC-CTCF-IP-Blobel-Rep2-S1_S8_peakcall_MACS2_rendition_1E-8_downsampled_try3_peak_1375	802	30.9085	80.269	75.923	114
chr1	157568635	157568884	Project004-IPSHOCH-Exp5-ChIP-NPC-CTCF-IP-Blobel-Rep2-S1_S8_peakcall_MACS2_rendition_1E-8_downsampled_try3_peak_1376	573	24.3686	57.3574	53.6053	145
chr1	157631978	157632257	Project004-IPSHOCH-Exp5-ChIP-NPC-CTCF-IP-Blobel-Rep2-S1_S8_peakcall_MACS2_rendition_1E-8_downsampled_try3_peak_1377	588	24.8077	58.8844	55.0979	179
chr1	157883628	157883871	Project004-IPSHOCH-Exp5-ChIP-NPC-CTCF-IP-Blobel-Rep2-S1_S8_peakcall_MACS2_rendition_1E-8_downsampled_try3_peak_1378	512	14.4915	51.2195	47.6206	111
chr1	157890282	157890419	Project004-IPSHOCH-Exp5-ChIP-NPC-CTCF-IP-Blobel-Rep2-S1_S8_peakcall_MACS2_rendition_1E-8_downsampled_try3_peak_1379	164	7.5	16.4902	13.6432	68
chr1	157933015	157933254	Project004-IPSHOCH-Exp5-ChIP-NPC-CTCF-IP-Blobel-Rep2-S1_S8_peakcall_MACS2_rendition_1E-8_downsampled_try3_peak_1380	645	26.6894	64.5131	60.5886	93
chr1	158159667	158159869	Project004-IPSHOCH-Exp5-ChIP-NPC-CTCF-IP-Blobel-Rep2-S1_S8_peakcall_MACS2_rendition_1E-8_downsampled_try3_peak_1381	537	19.4595	53.7338	50.0722	112
chr1	158171286	158171531	Project004-IPSHOCH-Exp5-ChIP-NPC-CTCF-IP-Blobel-Rep2-S1_S8_peakcall_MACS2_rendition_1E-8_downsampled_try3_peak_1382	450	20.1923	45.0382	41.5819	115
chr1	158171895	158172144	Project004-IPSHOCH-Exp5-ChIP-NPC-CTCF-IP-Blobel-Rep2-S1_S8_peakcall_MACS2_rendition_1E-8_downsampled_try3_peak_1383	418	16.2162	41.8796	38.4905	135
chr1	158193512	158193839	Project004-IPSHOCH-Exp5-ChIP-NPC-CTCF-IP-Blobel-Rep2-S1_S8_peakcall_MACS2_rendition_1E-8_downsampled_try3_peak_1384	614	21.4865	61.4404	57.5919	117
chr1	158348386	158348577	Project004-IPSHOCH-Exp5-ChIP-NPC-CTCF-IP-Blobel-Rep2-S1_S8_peakcall_MACS2_rendition_1E-8_downsampled_try3_peak_1385	369	17.4061	36.944	33.6632	112
chr1	158468590	158468784	Project004-IPSHOCH-Exp5-ChIP-NPC-CTCF-IP-Blobel-Rep2-S1_S8_peakcall_MACS2_rendition_1E-8_downsampled_try3_peak_1386	353	16.8259	35.3259	32.0766	103
chr1	158470416	158470605	Project004-IPSHOCH-Exp5-ChIP-NPC-CTCF-IP-Blobel-Rep2-S1_S8_peakcall_MACS2_rendition_1E-8_downsampled_try3_peak_1387	256	12.5489	25.6897	22.6451	80
chr1	158544870	158545025	Project004-IPSHOCH-Exp5-ChIP-NPC-CTCF-IP-Blobel-Rep2-S1_S8_peakcall_MACS2_rendition_1E-8_downsampled_try3_peak_1388	228	10.5405	22.8938	19.9053	80
chr1	158561181	158561389	Project004-IPSHOCH-Exp5-ChIP-NPC-CTCF-IP-Blobel-Rep2-S1_S8_peakcall_MACS2_rendition_1E-8_downsampled_try3_peak_1389	305	15.0853	30.5622	27.4146	98
chr1	158563406	158563599	Project004-IPSHOCH-Exp5-ChIP-NPC-CTCF-IP-Blobel-Rep2-S1_S8_peakcall_MACS2_rendition_1E-8_downsampled_try3_peak_1390	267	11.7568	26.7382	23.6677	111
chr1	158606419	158606560	Project004-IPSHOCH-Exp5-ChIP-NPC-CTCF-IP-Blobel-Rep2-S1_S8_peakcall_MACS2_rendition_1E-8_downsampled_try3_peak_1391	317	15.4404	31.7447	28.5779	84
chr1	158672006	158672332	Project004-IPSHOCH-Exp5-ChIP-NPC-CTCF-IP-Blobel-Rep2-S1_S8_peakcall_MACS2_rendition_1E-8_downsampled_try3_peak_1392	1023	38.2935	102.321	97.4239	204
chr1	158682556	158682783	Project004-IPSHOCH-Exp5-ChIP-NPC-CTCF-IP-Blobel-Rep2-S1_S8_peakcall_MACS2_rendition_1E-8_downsampled_try3_peak_1393	320	13.3784	32.0676	28.8888	105
chr1	158840104	158840242	Project004-IPSHOCH-Exp5-ChIP-NPC-CTCF-IP-Blobel-Rep2-S1_S8_peakcall_MACS2_rendition_1E-8_downsampled_try3_peak_1394	185	10.3846	18.5323	15.6407	110
chr1	158847654	158847840	Project004-IPSHOCH-Exp5-ChIP-NPC-CTCF-IP-Blobel-Rep2-S1_S8_peakcall_MACS2_rendition_1E-8_downsampled_try3_peak_1395	208	7.28571	20.8295	17.884	119
chr1	159006466	159006707	Project004-IPSHOCH-Exp5-ChIP-NPC-CTCF-IP-Blobel-Rep2-S1_S8_peakcall_MACS2_rendition_1E-8_downsampled_try3_peak_1396	567	20.2703	56.7908	53.0543	138
chr1	159007300	159007520	Project004-IPSHOCH-Exp5-ChIP-NPC-CTCF-IP-Blobel-Rep2-S1_S8_peakcall_MACS2_rendition_1E-8_downsampled_try3_peak_1397	725	24.3243	72.5667	68.4224	118
chr1	159009538	159009759	Project004-IPSHOCH-Exp5-ChIP-NPC-CTCF-IP-Blobel-Rep2-S1_S8_peakcall_MACS2_rendition_1E-8_downsampled_try3_peak_1398	914	34.2201	91.459	86.8206	116
chr1	159012255	159012380	Project004-IPSHOCH-Exp5-ChIP-NPC-CTCF-IP-Blobel-Rep2-S1_S8_peakcall_MACS2_rendition_1E-8_downsampled_try3_peak_1399	171	9.80769	17.1414	14.2785	45
chr1	159016320	159016548	Project004-IPSHOCH-Exp5-ChIP-NPC-CTCF-IP-Blobel-Rep2-S1_S8_peakcall_MACS2_rendition_1E-8_downsampled_try3_peak_1400	390	15.4054	39.0183	35.6872	113
chr1	159211074	159211212	Project004-IPSHOCH-Exp5-ChIP-NPC-CTCF-IP-Blobel-Rep2-S1_S8_peakcall_MACS2_rendition_1E-8_downsampled_try3_peak_1401	111	5.33898	11.106	8.40234	81
chr1	159216796	159216991	Project004-IPSHOCH-Exp5-ChIP-NPC-CTCF-IP-Blobel-Rep2-S1_S8_peakcall_MACS2_rendition_1E-8_downsampled_try3_peak_1402	407	17.2877	40.7898	37.4246	103
chr1	159229780	159229914	Project004-IPSHOCH-Exp5-ChIP-NPC-CTCF-IP-Blobel-Rep2-S1_S8_peakcall_MACS2_rendition_1E-8_downsampled_try3_peak_1403	181	9.6043	18.1455	15.2609	80
chr1	159376582	159376750	Project004-IPSHOCH-Exp5-ChIP-NPC-CTCF-IP-Blobel-Rep2-S1_S8_peakcall_MACS2_rendition_1E-8_downsampled_try3_peak_1404	238	8.64407	23.8159	20.8121	83
chr1	159395422	159395595	Project004-IPSHOCH-Exp5-ChIP-NPC-CTCF-IP-Blobel-Rep2-S1_S8_peakcall_MACS2_rendition_1E-8_downsampled_try3_peak_1405	164	7.5	16.4902	13.6432	115
chr1	159466685	159466960	Project004-IPSHOCH-Exp5-ChIP-NPC-CTCF-IP-Blobel-Rep2-S1_S8_peakcall_MACS2_rendition_1E-8_downsampled_try3_peak_1406	730	24.0783	73.0356	68.8826	138
chr1	159467925	159468062	Project004-IPSHOCH-Exp5-ChIP-NPC-CTCF-IP-Blobel-Rep2-S1_S8_peakcall_MACS2_rendition_1E-8_downsampled_try3_peak_1407	169	9.72173	16.995	14.1375	51
chr1	159483221	159483504	Project004-IPSHOCH-Exp5-ChIP-NPC-CTCF-IP-Blobel-Rep2-S1_S8_peakcall_MACS2_rendition_1E-8_downsampled_try3_peak_1408	1131	29.0625	113.163	108.046	151
chr1	159490775	159490958	Project004-IPSHOCH-Exp5-ChIP-NPC-CTCF-IP-Blobel-Rep2-S1_S8_peakcall_MACS2_rendition_1E-8_downsampled_try3_peak_1409	447	17.027	44.7837	41.3346	107
chr1	159675828	159676054	Project004-IPSHOCH-Exp5-ChIP-NPC-CTCF-IP-Blobel-Rep2-S1_S8_peakcall_MACS2_rendition_1E-8_downsampled_try3_peak_1410	689	26.3403	68.9129	64.8744	108
chr1	159688547	159688715	Project004-IPSHOCH-Exp5-ChIP-NPC-CTCF-IP-Blobel-Rep2-S1_S8_peakcall_MACS2_rendition_1E-8_downsampled_try3_peak_1411	229	12.1843	22.9595	19.9656	70
chr1	159987149	159987333	Project004-IPSHOCH-Exp5-ChIP-NPC-CTCF-IP-Blobel-Rep2-S1_S8_peakcall_MACS2_rendition_1E-8_downsampled_try3_peak_1412	305	15.0853	30.5622	27.4146	64
chr1	160077815	160077941	Project004-IPSHOCH-Exp5-ChIP-NPC-CTCF-IP-Blobel-Rep2-S1_S8_peakcall_MACS2_rendition_1E-8_downsampled_try3_peak_1413	132	8.12287	13.2009	10.4334	52
chr1	160145014	160145137	Project004-IPSHOCH-Exp5-ChIP-NPC-CTCF-IP-Blobel-Rep2-S1_S8_peakcall_MACS2_rendition_1E-8_downsampled_try3_peak_1414	119	7.54266	11.9126	9.18019	70
chr1	160273581	160273775	Project004-IPSHOCH-Exp5-ChIP-NPC-CTCF-IP-Blobel-Rep2-S1_S8_peakcall_MACS2_rendition_1E-8_downsampled_try3_peak_1415	137	6.10169	13.796	11.0152	136
chr1	160527304	160527491	Project004-IPSHOCH-Exp5-ChIP-NPC-CTCF-IP-Blobel-Rep2-S1_S8_peakcall_MACS2_rendition_1E-8_downsampled_try3_peak_1416	321	15.6655	32.1345	28.9516	73
chr1	160584391	160584612	Project004-IPSHOCH-Exp5-ChIP-NPC-CTCF-IP-Blobel-Rep2-S1_S8_peakcall_MACS2_rendition_1E-8_downsampled_try3_peak_1417	337	16.2457	33.7226	30.5085	111
chr1	160584754	160585013	Project004-IPSHOCH-Exp5-ChIP-NPC-CTCF-IP-Blobel-Rep2-S1_S8_peakcall_MACS2_rendition_1E-8_downsampled_try3_peak_1418	400	18.4615	40.0393	36.6973	166
chr1	160600396	160600622	Project004-IPSHOCH-Exp5-ChIP-NPC-CTCF-IP-Blobel-Rep2-S1_S8_peakcall_MACS2_rendition_1E-8_downsampled_try3_peak_1419	351	15.1892	35.1508	31.9102	115
chr1	160643540	160643681	Project004-IPSHOCH-Exp5-ChIP-NPC-CTCF-IP-Blobel-Rep2-S1_S8_peakcall_MACS2_rendition_1E-8_downsampled_try3_peak_1420	201	10.5411	20.1907	17.2592	80
chr1	160883780	160884032	Project004-IPSHOCH-Exp5-ChIP-NPC-CTCF-IP-Blobel-Rep2-S1_S8_peakcall_MACS2_rendition_1E-8_downsampled_try3_peak_1421	681	27.8498	68.1478	64.1207	103
chr1	161065495	161065842	Project004-IPSHOCH-Exp5-ChIP-NPC-CTCF-IP-Blobel-Rep2-S1_S8_peakcall_MACS2_rendition_1E-8_downsampled_try3_peak_1422	699	28.43	69.9786	65.9033	164
chr1	161217095	161217218	Project004-IPSHOCH-Exp5-ChIP-NPC-CTCF-IP-Blobel-Rep2-S1_S8_peakcall_MACS2_rendition_1E-8_downsampled_try3_peak_1423	168	8.83861	16.881	14.0256	57
chr1	161220499	161220641	Project004-IPSHOCH-Exp5-ChIP-NPC-CTCF-IP-Blobel-Rep2-S1_S8_peakcall_MACS2_rendition_1E-8_downsampled_try3_peak_1424	248	8.8983	24.8937	21.8632	46
chr1	161320317	161320440	Project004-IPSHOCH-Exp5-ChIP-NPC-CTCF-IP-Blobel-Rep2-S1_S8_peakcall_MACS2_rendition_1E-8_downsampled_try3_peak_1425	144	6.875	14.4294	11.6384	36
chr1	161326670	161326834	Project004-IPSHOCH-Exp5-ChIP-NPC-CTCF-IP-Blobel-Rep2-S1_S8_peakcall_MACS2_rendition_1E-8_downsampled_try3_peak_1426	161	6.21429	16.1187	13.2792	80
chr1	161453755	161453953	Project004-IPSHOCH-Exp5-ChIP-NPC-CTCF-IP-Blobel-Rep2-S1_S8_peakcall_MACS2_rendition_1E-8_downsampled_try3_peak_1427	537	19.4595	53.7338	50.0722	97
chr1	161496316	161496446	Project004-IPSHOCH-Exp5-ChIP-NPC-CTCF-IP-Blobel-Rep2-S1_S8_peakcall_MACS2_rendition_1E-8_downsampled_try3_peak_1428	156	8.93796	15.682	12.8542	63
chr1	161714033	161714372	Project004-IPSHOCH-Exp5-ChIP-NPC-CTCF-IP-Blobel-Rep2-S1_S8_peakcall_MACS2_rendition_1E-8_downsampled_try3_peak_1429	462	17.4324	46.2512	42.766	148
chr1	161808942	161809129	Project004-IPSHOCH-Exp5-ChIP-NPC-CTCF-IP-Blobel-Rep2-S1_S8_peakcall_MACS2_rendition_1E-8_downsampled_try3_peak_1430	245	12.2129	24.5646	21.5387	88
chr1	161974578	161974798	Project004-IPSHOCH-Exp5-ChIP-NPC-CTCF-IP-Blobel-Rep2-S1_S8_peakcall_MACS2_rendition_1E-8_downsampled_try3_peak_1431	233	12.1426	23.3799	20.3798	138
chr1	161992238	161992364	Project004-IPSHOCH-Exp5-ChIP-NPC-CTCF-IP-Blobel-Rep2-S1_S8_peakcall_MACS2_rendition_1E-8_downsampled_try3_peak_1432	123	6.89189	12.3237	9.58027	62
chr1	162011294	162011490	Project004-IPSHOCH-Exp5-ChIP-NPC-CTCF-IP-Blobel-Rep2-S1_S8_peakcall_MACS2_rendition_1E-8_downsampled_try3_peak_1433	228	12.1154	22.8408	19.8579	94
chr1	162029874	162030046	Project004-IPSHOCH-Exp5-ChIP-NPC-CTCF-IP-Blobel-Rep2-S1_S8_peakcall_MACS2_rendition_1E-8_downsampled_try3_peak_1434	228	12.1154	22.8408	19.8579	84
chr1	162124913	162125205	Project004-IPSHOCH-Exp5-ChIP-NPC-CTCF-IP-Blobel-Rep2-S1_S8_peakcall_MACS2_rendition_1E-8_downsampled_try3_peak_1435	339	10.9322	33.9286	30.7076	187
chr1	162143268	162143622	Project004-IPSHOCH-Exp5-ChIP-NPC-CTCF-IP-Blobel-Rep2-S1_S8_peakcall_MACS2_rendition_1E-8_downsampled_try3_peak_1436	507	18.6486	50.7125	47.1216	181
chr1	162161247	162161402	Project004-IPSHOCH-Exp5-ChIP-NPC-CTCF-IP-Blobel-Rep2-S1_S8_peakcall_MACS2_rendition_1E-8_downsampled_try3_peak_1437	228	12.1154	22.8408	19.8579	69
chr1	162307808	162308059	Project004-IPSHOCH-Exp5-ChIP-NPC-CTCF-IP-Blobel-Rep2-S1_S8_peakcall_MACS2_rendition_1E-8_downsampled_try3_peak_1438	477	17.8378	47.7286	44.2084	142
chr1	162329659	162329865	Project004-IPSHOCH-Exp5-ChIP-NPC-CTCF-IP-Blobel-Rep2-S1_S8_peakcall_MACS2_rendition_1E-8_downsampled_try3_peak_1439	374	11.6949	37.4879	34.1992	88
chr1	162341054	162341253	Project004-IPSHOCH-Exp5-ChIP-NPC-CTCF-IP-Blobel-Rep2-S1_S8_peakcall_MACS2_rendition_1E-8_downsampled_try3_peak_1440	450	20.1923	45.0382	41.5819	110
chr1	162491584	162491801	Project004-IPSHOCH-Exp5-ChIP-NPC-CTCF-IP-Blobel-Rep2-S1_S8_peakcall_MACS2_rendition_1E-8_downsampled_try3_peak_1441	447	17.027	44.7837	41.3346	113
chr1	162644982	162645154	Project004-IPSHOCH-Exp5-ChIP-NPC-CTCF-IP-Blobel-Rep2-S1_S8_peakcall_MACS2_rendition_1E-8_downsampled_try3_peak_1442	374	11.6949	37.4879	34.1992	61
chr1	162673490	162673702	Project004-IPSHOCH-Exp5-ChIP-NPC-CTCF-IP-Blobel-Rep2-S1_S8_peakcall_MACS2_rendition_1E-8_downsampled_try3_peak_1443	390	15.4054	39.0183	35.6872	98
chr1	162688442	162688688	Project004-IPSHOCH-Exp5-ChIP-NPC-CTCF-IP-Blobel-Rep2-S1_S8_peakcall_MACS2_rendition_1E-8_downsampled_try3_peak_1444	553	23.6538	55.3579	51.6521	99
chr1	162864141	162864568	Project004-IPSHOCH-Exp5-ChIP-NPC-CTCF-IP-Blobel-Rep2-S1_S8_peakcall_MACS2_rendition_1E-8_downsampled_try3_peak_1445	647	23.4223	64.7983	60.8633	309
chr1	163100919	163101137	Project004-IPSHOCH-Exp5-ChIP-NPC-CTCF-IP-Blobel-Rep2-S1_S8_peakcall_MACS2_rendition_1E-8_downsampled_try3_peak_1446	208	8.75	20.8176	17.8726	159
chr1	163110932	163111123	Project004-IPSHOCH-Exp5-ChIP-NPC-CTCF-IP-Blobel-Rep2-S1_S8_peakcall_MACS2_rendition_1E-8_downsampled_try3_peak_1447	400	18.4615	40.0393	36.6973	106
chr1	163125641	163125997	Project004-IPSHOCH-Exp5-ChIP-NPC-CTCF-IP-Blobel-Rep2-S1_S8_peakcall_MACS2_rendition_1E-8_downsampled_try3_peak_1448	281	9.66102	28.1988	25.0979	209
chr1	163144685	163144858	Project004-IPSHOCH-Exp5-ChIP-NPC-CTCF-IP-Blobel-Rep2-S1_S8_peakcall_MACS2_rendition_1E-8_downsampled_try3_peak_1449	334	13.7838	33.4333	30.2288	80
chr1	163216935	163217178	Project004-IPSHOCH-Exp5-ChIP-NPC-CTCF-IP-Blobel-Rep2-S1_S8_peakcall_MACS2_rendition_1E-8_downsampled_try3_peak_1450	468	19.979	46.8023	43.3089	76
chr1	163330310	163330568	Project004-IPSHOCH-Exp5-ChIP-NPC-CTCF-IP-Blobel-Rep2-S1_S8_peakcall_MACS2_rendition_1E-8_downsampled_try3_peak_1451	376	13.125	37.6986	34.3994	119
chr1	163532459	163532582	Project004-IPSHOCH-Exp5-ChIP-NPC-CTCF-IP-Blobel-Rep2-S1_S8_peakcall_MACS2_rendition_1E-8_downsampled_try3_peak_1452	164	7.5	16.4902	13.6432	23
chr1	163617804	163618008	Project004-IPSHOCH-Exp5-ChIP-NPC-CTCF-IP-Blobel-Rep2-S1_S8_peakcall_MACS2_rendition_1E-8_downsampled_try3_peak_1453	448	13.2203	44.8531	41.402	90
chr1	163665687	163665923	Project004-IPSHOCH-Exp5-ChIP-NPC-CTCF-IP-Blobel-Rep2-S1_S8_peakcall_MACS2_rendition_1E-8_downsampled_try3_peak_1454	606	25.3846	60.6627	56.8336	114
chr1	163667070	163667360	Project004-IPSHOCH-Exp5-ChIP-NPC-CTCF-IP-Blobel-Rep2-S1_S8_peakcall_MACS2_rendition_1E-8_downsampled_try3_peak_1455	290	14.5051	29.0062	25.8892	101
chr1	163678380	163678564	Project004-IPSHOCH-Exp5-ChIP-NPC-CTCF-IP-Blobel-Rep2-S1_S8_peakcall_MACS2_rendition_1E-8_downsampled_try3_peak_1456	307	12.973	30.7148	27.5609	80
chr1	163893263	163893437	Project004-IPSHOCH-Exp5-ChIP-NPC-CTCF-IP-Blobel-Rep2-S1_S8_peakcall_MACS2_rendition_1E-8_downsampled_try3_peak_1457	229	12.1843	22.9595	19.9656	80
chr1	163899072	163899401	Project004-IPSHOCH-Exp5-ChIP-NPC-CTCF-IP-Blobel-Rep2-S1_S8_peakcall_MACS2_rendition_1E-8_downsampled_try3_peak_1458	1058	39.2308	105.868	100.897	172
chr1	163906580	163906913	Project004-IPSHOCH-Exp5-ChIP-NPC-CTCF-IP-Blobel-Rep2-S1_S8_peakcall_MACS2_rendition_1E-8_downsampled_try3_peak_1459	666	19.6875	66.6649	62.679	158
chr1	163929966	163930215	Project004-IPSHOCH-Exp5-ChIP-NPC-CTCF-IP-Blobel-Rep2-S1_S8_peakcall_MACS2_rendition_1E-8_downsampled_try3_peak_1460	535	22.6294	53.5811	49.9338	146
chr1	164206315	164206466	Project004-IPSHOCH-Exp5-ChIP-NPC-CTCF-IP-Blobel-Rep2-S1_S8_peakcall_MACS2_rendition_1E-8_downsampled_try3_peak_1461	266	13.1441	26.6869	23.6222	55
chr1	164217150	164217305	Project004-IPSHOCH-Exp5-ChIP-NPC-CTCF-IP-Blobel-Rep2-S1_S8_peakcall_MACS2_rendition_1E-8_downsampled_try3_peak_1462	219	11.5907	21.9462	18.9742	87
chr1	164243858	164244069	Project004-IPSHOCH-Exp5-ChIP-NPC-CTCF-IP-Blobel-Rep2-S1_S8_peakcall_MACS2_rendition_1E-8_downsampled_try3_peak_1463	524	16.5625	52.4199	48.7864	108
chr1	164266870	164267055	Project004-IPSHOCH-Exp5-ChIP-NPC-CTCF-IP-Blobel-Rep2-S1_S8_peakcall_MACS2_rendition_1E-8_downsampled_try3_peak_1464	456	18.4111	45.6423	42.1688	78
chr1	164288250	164288445	Project004-IPSHOCH-Exp5-ChIP-NPC-CTCF-IP-Blobel-Rep2-S1_S8_peakcall_MACS2_rendition_1E-8_downsampled_try3_peak_1465	447	17.027	44.7837	41.3346	108
chr1	164289502	164289686	Project004-IPSHOCH-Exp5-ChIP-NPC-CTCF-IP-Blobel-Rep2-S1_S8_peakcall_MACS2_rendition_1E-8_downsampled_try3_peak_1466	362	14.5946	36.202	32.9388	91
chr1	164461814	164461997	Project004-IPSHOCH-Exp5-ChIP-NPC-CTCF-IP-Blobel-Rep2-S1_S8_peakcall_MACS2_rendition_1E-8_downsampled_try3_peak_1467	204	9.72973	20.4115	17.4743	106
chr1	164480069	164480258	Project004-IPSHOCH-Exp5-ChIP-NPC-CTCF-IP-Blobel-Rep2-S1_S8_peakcall_MACS2_rendition_1E-8_downsampled_try3_peak_1468	435	15.0784	43.5272	40.105	86
chr1	164550685	164550876	Project004-IPSHOCH-Exp5-ChIP-NPC-CTCF-IP-Blobel-Rep2-S1_S8_peakcall_MACS2_rendition_1E-8_downsampled_try3_peak_1469	242	9.6875	24.2245	21.2098	110
chr1	164595281	164595541	Project004-IPSHOCH-Exp5-ChIP-NPC-CTCF-IP-Blobel-Rep2-S1_S8_peakcall_MACS2_rendition_1E-8_downsampled_try3_peak_1470	741	24.7297	74.1858	69.9955	160
chr1	164670750	164670873	Project004-IPSHOCH-Exp5-ChIP-NPC-CTCF-IP-Blobel-Rep2-S1_S8_peakcall_MACS2_rendition_1E-8_downsampled_try3_peak_1471	129	7.73962	12.9142	10.1608	40
chr1	164711336	164711459	Project004-IPSHOCH-Exp5-ChIP-NPC-CTCF-IP-Blobel-Rep2-S1_S8_peakcall_MACS2_rendition_1E-8_downsampled_try3_peak_1472	144	8.65385	14.4351	11.6391	50
chr1	164744084	164744265	Project004-IPSHOCH-Exp5-ChIP-NPC-CTCF-IP-Blobel-Rep2-S1_S8_peakcall_MACS2_rendition_1E-8_downsampled_try3_peak_1473	296	14.1956	29.6239	26.4943	86
chr1	164826056	164826287	Project004-IPSHOCH-Exp5-ChIP-NPC-CTCF-IP-Blobel-Rep2-S1_S8_peakcall_MACS2_rendition_1E-8_downsampled_try3_peak_1474	652	19.375	65.2077	61.2614	120
chr1	164987560	164987803	Project004-IPSHOCH-Exp5-ChIP-NPC-CTCF-IP-Blobel-Rep2-S1_S8_peakcall_MACS2_rendition_1E-8_downsampled_try3_peak_1475	400	18.4615	40.0393	36.6973	121
chr1	165000737	165000931	Project004-IPSHOCH-Exp5-ChIP-NPC-CTCF-IP-Blobel-Rep2-S1_S8_peakcall_MACS2_rendition_1E-8_downsampled_try3_peak_1476	567	20.2703	56.7908	53.0543	97
chr1	165021725	165021865	Project004-IPSHOCH-Exp5-ChIP-NPC-CTCF-IP-Blobel-Rep2-S1_S8_peakcall_MACS2_rendition_1E-8_downsampled_try3_peak_1477	308	14.9023	30.8217	27.6659	63
chr1	165080564	165080905	Project004-IPSHOCH-Exp5-ChIP-NPC-CTCF-IP-Blobel-Rep2-S1_S8_peakcall_MACS2_rendition_1E-8_downsampled_try3_peak_1478	873	27.973	87.3842	82.848	201
chr1	165709506	165709712	Project004-IPSHOCH-Exp5-ChIP-NPC-CTCF-IP-Blobel-Rep2-S1_S8_peakcall_MACS2_rendition_1E-8_downsampled_try3_peak_1479	406	15.108	40.6583	37.2948	58
chr1	165764322	165764490	Project004-IPSHOCH-Exp5-ChIP-NPC-CTCF-IP-Blobel-Rep2-S1_S8_peakcall_MACS2_rendition_1E-8_downsampled_try3_peak_1480	280	12.8878	28.0393	24.9473	98
chr1	165840564	165840879	Project004-IPSHOCH-Exp5-ChIP-NPC-CTCF-IP-Blobel-Rep2-S1_S8_peakcall_MACS2_rendition_1E-8_downsampled_try3_peak_1481	733	29.4231	73.3726	69.2094	97
chr1	165939356	165939681	Project004-IPSHOCH-Exp5-ChIP-NPC-CTCF-IP-Blobel-Rep2-S1_S8_peakcall_MACS2_rendition_1E-8_downsampled_try3_peak_1482	348	14.1892	34.8116	31.5773	218
chr1	165991483	165991628	Project004-IPSHOCH-Exp5-ChIP-NPC-CTCF-IP-Blobel-Rep2-S1_S8_peakcall_MACS2_rendition_1E-8_downsampled_try3_peak_1483	199	10.9615	19.9467	17.0228	61
chr1	166068781	166069302	Project004-IPSHOCH-Exp5-ChIP-NPC-CTCF-IP-Blobel-Rep2-S1_S8_peakcall_MACS2_rendition_1E-8_downsampled_try3_peak_1484	1044	36.1409	104.457	99.5091	223
chr1	166078116	166078260	Project004-IPSHOCH-Exp5-ChIP-NPC-CTCF-IP-Blobel-Rep2-S1_S8_peakcall_MACS2_rendition_1E-8_downsampled_try3_peak_1485	168	8.51351	16.8225	13.9686	40
chr1	166114775	166115024	Project004-IPSHOCH-Exp5-ChIP-NPC-CTCF-IP-Blobel-Rep2-S1_S8_peakcall_MACS2_rendition_1E-8_downsampled_try3_peak_1486	362	14.5946	36.202	32.9388	119
chr1	166245546	166245721	Project004-IPSHOCH-Exp5-ChIP-NPC-CTCF-IP-Blobel-Rep2-S1_S8_peakcall_MACS2_rendition_1E-8_downsampled_try3_peak_1487	242	12.6463	24.2394	21.2245	96
chr1	166246873	166247111	Project004-IPSHOCH-Exp5-ChIP-NPC-CTCF-IP-Blobel-Rep2-S1_S8_peakcall_MACS2_rendition_1E-8_downsampled_try3_peak_1488	462	17.4324	46.2512	42.766	155
chr1	166272424	166272605	Project004-IPSHOCH-Exp5-ChIP-NPC-CTCF-IP-Blobel-Rep2-S1_S8_peakcall_MACS2_rendition_1E-8_downsampled_try3_peak_1489	228	12.1154	22.8408	19.8579	105
chr1	166296932	166297148	Project004-IPSHOCH-Exp5-ChIP-NPC-CTCF-IP-Blobel-Rep2-S1_S8_peakcall_MACS2_rendition_1E-8_downsampled_try3_peak_1490	598	21.0811	59.8822	56.0741	99
chr1	166385803	166385937	Project004-IPSHOCH-Exp5-ChIP-NPC-CTCF-IP-Blobel-Rep2-S1_S8_peakcall_MACS2_rendition_1E-8_downsampled_try3_peak_1491	158	9.28328	15.8647	13.0259	58
chr1	166675172	166675352	Project004-IPSHOCH-Exp5-ChIP-NPC-CTCF-IP-Blobel-Rep2-S1_S8_peakcall_MACS2_rendition_1E-8_downsampled_try3_peak_1492	137	6.10169	13.796	11.0152	102
chr1	166692509	166692660	Project004-IPSHOCH-Exp5-ChIP-NPC-CTCF-IP-Blobel-Rep2-S1_S8_peakcall_MACS2_rendition_1E-8_downsampled_try3_peak_1493	219	11.5907	21.9462	18.9742	80
chr1	166800886	166801057	Project004-IPSHOCH-Exp5-ChIP-NPC-CTCF-IP-Blobel-Rep2-S1_S8_peakcall_MACS2_rendition_1E-8_downsampled_try3_peak_1494	248	12.6946	24.8328	21.8036	77
chr1	166828915	166829181	Project004-IPSHOCH-Exp5-ChIP-NPC-CTCF-IP-Blobel-Rep2-S1_S8_peakcall_MACS2_rendition_1E-8_downsampled_try3_peak_1495	418	18.7659	41.8913	38.4983	84
chr1	166835246	166835480	Project004-IPSHOCH-Exp5-ChIP-NPC-CTCF-IP-Blobel-Rep2-S1_S8_peakcall_MACS2_rendition_1E-8_downsampled_try3_peak_1496	450	20.224	45.0934	41.6367	96
chr1	166965953	166966185	Project004-IPSHOCH-Exp5-ChIP-NPC-CTCF-IP-Blobel-Rep2-S1_S8_peakcall_MACS2_rendition_1E-8_downsampled_try3_peak_1497	369	17.4061	36.944	33.6632	112
chr1	167006018	167006193	Project004-IPSHOCH-Exp5-ChIP-NPC-CTCF-IP-Blobel-Rep2-S1_S8_peakcall_MACS2_rendition_1E-8_downsampled_try3_peak_1498	363	17.0679	36.3574	33.0911	99
chr1	167050569	167050836	Project004-IPSHOCH-Exp5-ChIP-NPC-CTCF-IP-Blobel-Rep2-S1_S8_peakcall_MACS2_rendition_1E-8_downsampled_try3_peak_1499	681	24.855	68.1291	64.1078	118
chr1	167062706	167062971	Project004-IPSHOCH-Exp5-ChIP-NPC-CTCF-IP-Blobel-Rep2-S1_S8_peakcall_MACS2_rendition_1E-8_downsampled_try3_peak_1500	608	18.4375	60.8783	57.0443	117
chr1	167182248	167182497	Project004-IPSHOCH-Exp5-ChIP-NPC-CTCF-IP-Blobel-Rep2-S1_S8_peakcall_MACS2_rendition_1E-8_downsampled_try3_peak_1501	567	20.2703	56.7908	53.0543	128
chr1	167250747	167250995	Project004-IPSHOCH-Exp5-ChIP-NPC-CTCF-IP-Blobel-Rep2-S1_S8_peakcall_MACS2_rendition_1E-8_downsampled_try3_peak_1502	802	30.9085	80.269	75.923	120
chr1	167319057	167319206	Project004-IPSHOCH-Exp5-ChIP-NPC-CTCF-IP-Blobel-Rep2-S1_S8_peakcall_MACS2_rendition_1E-8_downsampled_try3_peak_1503	253	10	25.3882	22.3512	67
chr1	167433927	167434127	Project004-IPSHOCH-Exp5-ChIP-NPC-CTCF-IP-Blobel-Rep2-S1_S8_peakcall_MACS2_rendition_1E-8_downsampled_try3_peak_1504	385	17.9864	38.5762	35.2632	82
chr1	167509665	167509797	Project004-IPSHOCH-Exp5-ChIP-NPC-CTCF-IP-Blobel-Rep2-S1_S8_peakcall_MACS2_rendition_1E-8_downsampled_try3_peak_1505	254	11.3514	25.4413	22.3988	41
chr1	167512378	167512548	Project004-IPSHOCH-Exp5-ChIP-NPC-CTCF-IP-Blobel-Rep2-S1_S8_peakcall_MACS2_rendition_1E-8_downsampled_try3_peak_1506	119	7.54266	11.9126	9.18019	101
chr1	167513666	167513953	Project004-IPSHOCH-Exp5-ChIP-NPC-CTCF-IP-Blobel-Rep2-S1_S8_peakcall_MACS2_rendition_1E-8_downsampled_try3_peak_1507	604	16.2712	60.4462	56.6261	169
chr1	167571605	167571818	Project004-IPSHOCH-Exp5-ChIP-NPC-CTCF-IP-Blobel-Rep2-S1_S8_peakcall_MACS2_rendition_1E-8_downsampled_try3_peak_1508	811	25.5374	81.1545	76.7791	106
chr1	167588844	167589063	Project004-IPSHOCH-Exp5-ChIP-NPC-CTCF-IP-Blobel-Rep2-S1_S8_peakcall_MACS2_rendition_1E-8_downsampled_try3_peak_1509	770	30.5769	77.0825	72.8198	99
chr1	167590978	167591187	Project004-IPSHOCH-Exp5-ChIP-NPC-CTCF-IP-Blobel-Rep2-S1_S8_peakcall_MACS2_rendition_1E-8_downsampled_try3_peak_1510	699	28.43	69.9786	65.9033	103
chr1	167666325	167666619	Project004-IPSHOCH-Exp5-ChIP-NPC-CTCF-IP-Blobel-Rep2-S1_S8_peakcall_MACS2_rendition_1E-8_downsampled_try3_peak_1511	1118	40.9615	111.807	106.714	172
chr1	167701796	167702019	Project004-IPSHOCH-Exp5-ChIP-NPC-CTCF-IP-Blobel-Rep2-S1_S8_peakcall_MACS2_rendition_1E-8_downsampled_try3_peak_1512	677	23.1081	67.7527	63.7449	100
chr1	167705724	167705986	Project004-IPSHOCH-Exp5-ChIP-NPC-CTCF-IP-Blobel-Rep2-S1_S8_peakcall_MACS2_rendition_1E-8_downsampled_try3_peak_1513	402	18.2139	40.2689	36.92	147
chr1	167709978	167710266	Project004-IPSHOCH-Exp5-ChIP-NPC-CTCF-IP-Blobel-Rep2-S1_S8_peakcall_MACS2_rendition_1E-8_downsampled_try3_peak_1514	501	21.5255	50.1847	46.6087	184
chr1	167710614	167710981	Project004-IPSHOCH-Exp5-ChIP-NPC-CTCF-IP-Blobel-Rep2-S1_S8_peakcall_MACS2_rendition_1E-8_downsampled_try3_peak_1515	1093	38.3807	109.307	104.27	200
chr1	167783985	167784162	Project004-IPSHOCH-Exp5-ChIP-NPC-CTCF-IP-Blobel-Rep2-S1_S8_peakcall_MACS2_rendition_1E-8_downsampled_try3_peak_1516	216	8.13559	21.6982	18.7324	62
chr1	167788642	167788826	Project004-IPSHOCH-Exp5-ChIP-NPC-CTCF-IP-Blobel-Rep2-S1_S8_peakcall_MACS2_rendition_1E-8_downsampled_try3_peak_1517	179	8.91892	17.9999	15.1172	62
chr1	167897235	167897478	Project004-IPSHOCH-Exp5-ChIP-NPC-CTCF-IP-Blobel-Rep2-S1_S8_peakcall_MACS2_rendition_1E-8_downsampled_try3_peak_1518	789	30.6619	78.9593	74.6491	115
chr1	167932792	167933007	Project004-IPSHOCH-Exp5-ChIP-NPC-CTCF-IP-Blobel-Rep2-S1_S8_peakcall_MACS2_rendition_1E-8_downsampled_try3_peak_1519	653	21.7259	65.3032	61.3564	89
chr1	168033428	168033612	Project004-IPSHOCH-Exp5-ChIP-NPC-CTCF-IP-Blobel-Rep2-S1_S8_peakcall_MACS2_rendition_1E-8_downsampled_try3_peak_1520	304	15	30.4143	27.2723	84
chr1	168083592	168083803	Project004-IPSHOCH-Exp5-ChIP-NPC-CTCF-IP-Blobel-Rep2-S1_S8_peakcall_MACS2_rendition_1E-8_downsampled_try3_peak_1521	499	14.2373	49.9306	46.3671	117
chr1	168084364	168084611	Project004-IPSHOCH-Exp5-ChIP-NPC-CTCF-IP-Blobel-Rep2-S1_S8_peakcall_MACS2_rendition_1E-8_downsampled_try3_peak_1522	552	17.1875	55.2085	51.5189	121
chr1	168090847	168091104	Project004-IPSHOCH-Exp5-ChIP-NPC-CTCF-IP-Blobel-Rep2-S1_S8_peakcall_MACS2_rendition_1E-8_downsampled_try3_peak_1523	390	15.4054	39.0183	35.6872	90
chr1	168144423	168144638	Project004-IPSHOCH-Exp5-ChIP-NPC-CTCF-IP-Blobel-Rep2-S1_S8_peakcall_MACS2_rendition_1E-8_downsampled_try3_peak_1524	175	7.8125	17.5473	14.6752	44
chr1	168184170	168184388	Project004-IPSHOCH-Exp5-ChIP-NPC-CTCF-IP-Blobel-Rep2-S1_S8_peakcall_MACS2_rendition_1E-8_downsampled_try3_peak_1525	370	15.4676	37.0005	33.7191	103
chr1	168249337	168249590	Project004-IPSHOCH-Exp5-ChIP-NPC-CTCF-IP-Blobel-Rep2-S1_S8_peakcall_MACS2_rendition_1E-8_downsampled_try3_peak_1526	709	23.9189	70.9547	66.8607	154
chr1	168290340	168290657	Project004-IPSHOCH-Exp5-ChIP-NPC-CTCF-IP-Blobel-Rep2-S1_S8_peakcall_MACS2_rendition_1E-8_downsampled_try3_peak_1527	812	20.0847	81.2878	76.9099	157
chr1	168668191	168668439	Project004-IPSHOCH-Exp5-ChIP-NPC-CTCF-IP-Blobel-Rep2-S1_S8_peakcall_MACS2_rendition_1E-8_downsampled_try3_peak_1528	486	21.4676	48.6447	45.1017	143
chr1	168712345	168712535	Project004-IPSHOCH-Exp5-ChIP-NPC-CTCF-IP-Blobel-Rep2-S1_S8_peakcall_MACS2_rendition_1E-8_downsampled_try3_peak_1529	552	23.1814	55.2951	51.5951	93
chr1	168932737	168932904	Project004-IPSHOCH-Exp5-ChIP-NPC-CTCF-IP-Blobel-Rep2-S1_S8_peakcall_MACS2_rendition_1E-8_downsampled_try3_peak_1530	241	10.9459	24.1597	21.1477	92
chr1	168964689	168964839	Project004-IPSHOCH-Exp5-ChIP-NPC-CTCF-IP-Blobel-Rep2-S1_S8_peakcall_MACS2_rendition_1E-8_downsampled_try3_peak_1531	131	8.07692	13.123	10.3635	87
chr1	169142456	169142701	Project004-IPSHOCH-Exp5-ChIP-NPC-CTCF-IP-Blobel-Rep2-S1_S8_peakcall_MACS2_rendition_1E-8_downsampled_try3_peak_1532	267	11.7568	26.7382	23.6677	137
chr1	169150769	169150953	Project004-IPSHOCH-Exp5-ChIP-NPC-CTCF-IP-Blobel-Rep2-S1_S8_peakcall_MACS2_rendition_1E-8_downsampled_try3_peak_1533	436	12.9661	43.6039	40.174	96
chr1	169213955	169214079	Project004-IPSHOCH-Exp5-ChIP-NPC-CTCF-IP-Blobel-Rep2-S1_S8_peakcall_MACS2_rendition_1E-8_downsampled_try3_peak_1534	138	7.82473	13.8556	11.0719	74
chr1	169267655	169267875	Project004-IPSHOCH-Exp5-ChIP-NPC-CTCF-IP-Blobel-Rep2-S1_S8_peakcall_MACS2_rendition_1E-8_downsampled_try3_peak_1535	469	15.3125	46.9413	43.4356	99
chr1	169300079	169300402	Project004-IPSHOCH-Exp5-ChIP-NPC-CTCF-IP-Blobel-Rep2-S1_S8_peakcall_MACS2_rendition_1E-8_downsampled_try3_peak_1536	873	27.973	87.3842	82.848	151
chr1	169344981	169345262	Project004-IPSHOCH-Exp5-ChIP-NPC-CTCF-IP-Blobel-Rep2-S1_S8_peakcall_MACS2_rendition_1E-8_downsampled_try3_peak_1537	555	23.7884	55.5934	51.8816	180
chr1	169567255	169567489	Project004-IPSHOCH-Exp5-ChIP-NPC-CTCF-IP-Blobel-Rep2-S1_S8_peakcall_MACS2_rendition_1E-8_downsampled_try3_peak_1538	566	22.0899	56.6187	52.8964	104
chr1	169568309	169568487	Project004-IPSHOCH-Exp5-ChIP-NPC-CTCF-IP-Blobel-Rep2-S1_S8_peakcall_MACS2_rendition_1E-8_downsampled_try3_peak_1539	334	13.7838	33.4333	30.2288	87
chr1	169575082	169575342	Project004-IPSHOCH-Exp5-ChIP-NPC-CTCF-IP-Blobel-Rep2-S1_S8_peakcall_MACS2_rendition_1E-8_downsampled_try3_peak_1540	725	24.3243	72.5667	68.4224	145
chr1	169600004	169600210	Project004-IPSHOCH-Exp5-ChIP-NPC-CTCF-IP-Blobel-Rep2-S1_S8_peakcall_MACS2_rendition_1E-8_downsampled_try3_peak_1541	320	13.3784	32.0676	28.8888	85
chr1	169712346	169712562	Project004-IPSHOCH-Exp5-ChIP-NPC-CTCF-IP-Blobel-Rep2-S1_S8_peakcall_MACS2_rendition_1E-8_downsampled_try3_peak_1542	507	18.6486	50.7125	47.1216	82
chr1	169826497	169826722	Project004-IPSHOCH-Exp5-ChIP-NPC-CTCF-IP-Blobel-Rep2-S1_S8_peakcall_MACS2_rendition_1E-8_downsampled_try3_peak_1543	518	22.5	51.8733	48.2623	106
chr1	169845462	169845664	Project004-IPSHOCH-Exp5-ChIP-NPC-CTCF-IP-Blobel-Rep2-S1_S8_peakcall_MACS2_rendition_1E-8_downsampled_try3_peak_1544	447	17.027	44.7837	41.3346	100
chr1	169860259	169860386	Project004-IPSHOCH-Exp5-ChIP-NPC-CTCF-IP-Blobel-Rep2-S1_S8_peakcall_MACS2_rendition_1E-8_downsampled_try3_peak_1545	145	7.95475	14.501	11.7042	55
chr1	169862283	169862491	Project004-IPSHOCH-Exp5-ChIP-NPC-CTCF-IP-Blobel-Rep2-S1_S8_peakcall_MACS2_rendition_1E-8_downsampled_try3_peak_1546	229	12.1843	22.9595	19.9656	115
chr1	169872138	169872371	Project004-IPSHOCH-Exp5-ChIP-NPC-CTCF-IP-Blobel-Rep2-S1_S8_peakcall_MACS2_rendition_1E-8_downsampled_try3_peak_1547	736	29.5904	73.6665	69.4953	93
chr1	170144344	170144639	Project004-IPSHOCH-Exp5-ChIP-NPC-CTCF-IP-Blobel-Rep2-S1_S8_peakcall_MACS2_rendition_1E-8_downsampled_try3_peak_1548	499	14.2373	49.9306	46.3671	107
chr1	170253138	170253261	Project004-IPSHOCH-Exp5-ChIP-NPC-CTCF-IP-Blobel-Rep2-S1_S8_peakcall_MACS2_rendition_1E-8_downsampled_try3_peak_1549	156	8.10811	15.6651	12.8402	68
chr1	170306644	170306790	Project004-IPSHOCH-Exp5-ChIP-NPC-CTCF-IP-Blobel-Rep2-S1_S8_peakcall_MACS2_rendition_1E-8_downsampled_try3_peak_1550	258	13.2692	25.8156	22.7667	69
chr1	170689126	170689266	Project004-IPSHOCH-Exp5-ChIP-NPC-CTCF-IP-Blobel-Rep2-S1_S8_peakcall_MACS2_rendition_1E-8_downsampled_try3_peak_1551	200	11.0239	20.0537	17.1237	69
chr1	171277969	171278198	Project004-IPSHOCH-Exp5-ChIP-NPC-CTCF-IP-Blobel-Rep2-S1_S8_peakcall_MACS2_rendition_1E-8_downsampled_try3_peak_1552	351	16.7308	35.1605	31.9158	112
chr1	171284263	171284398	Project004-IPSHOCH-Exp5-ChIP-NPC-CTCF-IP-Blobel-Rep2-S1_S8_peakcall_MACS2_rendition_1E-8_downsampled_try3_peak_1553	168	9.12409	16.8777	14.0228	89
chr1	171389608	171389814	Project004-IPSHOCH-Exp5-ChIP-NPC-CTCF-IP-Blobel-Rep2-S1_S8_peakcall_MACS2_rendition_1E-8_downsampled_try3_peak_1554	792	30.8168	79.2284	74.906	100
chr1	171425809	171426143	Project004-IPSHOCH-Exp5-ChIP-NPC-CTCF-IP-Blobel-Rep2-S1_S8_peakcall_MACS2_rendition_1E-8_downsampled_try3_peak_1555	718	29.0102	71.8183	67.6939	152
chr1	171447622	171448267	Project004-IPSHOCH-Exp5-ChIP-NPC-CTCF-IP-Blobel-Rep2-S1_S8_peakcall_MACS2_rendition_1E-8_downsampled_try3_peak_1556	334	13.7838	33.4333	30.2288	259
chr1	171448352	171448489	Project004-IPSHOCH-Exp5-ChIP-NPC-CTCF-IP-Blobel-Rep2-S1_S8_peakcall_MACS2_rendition_1E-8_downsampled_try3_peak_1557	228	12.1154	22.8408	19.8579	95
chr1	171462357	171462598	Project004-IPSHOCH-Exp5-ChIP-NPC-CTCF-IP-Blobel-Rep2-S1_S8_peakcall_MACS2_rendition_1E-8_downsampled_try3_peak_1558	403	17.8759	40.3736	37.0188	96
chr1	171600837	171601077	Project004-IPSHOCH-Exp5-ChIP-NPC-CTCF-IP-Blobel-Rep2-S1_S8_peakcall_MACS2_rendition_1E-8_downsampled_try3_peak_1559	520	22.628	52.0971	48.4764	103
chr1	171604364	171604540	Project004-IPSHOCH-Exp5-ChIP-NPC-CTCF-IP-Blobel-Rep2-S1_S8_peakcall_MACS2_rendition_1E-8_downsampled_try3_peak_1560	145	7.7027	14.5288	11.7208	64
chr1	171848219	171848447	Project004-IPSHOCH-Exp5-ChIP-NPC-CTCF-IP-Blobel-Rep2-S1_S8_peakcall_MACS2_rendition_1E-8_downsampled_try3_peak_1561	537	19.4595	53.7338	50.0722	114
chr1	171849427	171849676	Project004-IPSHOCH-Exp5-ChIP-NPC-CTCF-IP-Blobel-Rep2-S1_S8_peakcall_MACS2_rendition_1E-8_downsampled_try3_peak_1562	404	9.61957	40.419	37.0643	110
chr1	171851783	171852000	Project004-IPSHOCH-Exp5-ChIP-NPC-CTCF-IP-Blobel-Rep2-S1_S8_peakcall_MACS2_rendition_1E-8_downsampled_try3_peak_1563	230	9.375	23.0745	20.0771	102
chr1	171864462	171864694	Project004-IPSHOCH-Exp5-ChIP-NPC-CTCF-IP-Blobel-Rep2-S1_S8_peakcall_MACS2_rendition_1E-8_downsampled_try3_peak_1564	451	19.8697	45.1733	41.7145	113
chr1	171869590	171869801	Project004-IPSHOCH-Exp5-ChIP-NPC-CTCF-IP-Blobel-Rep2-S1_S8_peakcall_MACS2_rendition_1E-8_downsampled_try3_peak_1565	334	13.7838	33.4333	30.2288	102
chr1	171880881	171881010	Project004-IPSHOCH-Exp5-ChIP-NPC-CTCF-IP-Blobel-Rep2-S1_S8_peakcall_MACS2_rendition_1E-8_downsampled_try3_peak_1566	199	10.9615	19.9467	17.0228	76
chr1	172066589	172066827	Project004-IPSHOCH-Exp5-ChIP-NPC-CTCF-IP-Blobel-Rep2-S1_S8_peakcall_MACS2_rendition_1E-8_downsampled_try3_peak_1567	344	10.0714	34.4499	31.2238	91
chr1	172089959	172090096	Project004-IPSHOCH-Exp5-ChIP-NPC-CTCF-IP-Blobel-Rep2-S1_S8_peakcall_MACS2_rendition_1E-8_downsampled_try3_peak_1568	157	9.23077	15.7752	12.9422	105
chr1	172130641	172130777	Project004-IPSHOCH-Exp5-ChIP-NPC-CTCF-IP-Blobel-Rep2-S1_S8_peakcall_MACS2_rendition_1E-8_downsampled_try3_peak_1569	186	10.4437	18.6335	15.7332	72
chr1	172148711	172148861	Project004-IPSHOCH-Exp5-ChIP-NPC-CTCF-IP-Blobel-Rep2-S1_S8_peakcall_MACS2_rendition_1E-8_downsampled_try3_peak_1570	185	10.3846	18.5323	15.6407	75
chr1	172222642	172222974	Project004-IPSHOCH-Exp5-ChIP-NPC-CTCF-IP-Blobel-Rep2-S1_S8_peakcall_MACS2_rendition_1E-8_downsampled_try3_peak_1571	808	31.7308	80.8249	76.4573	186
chr1	172542847	172542981	Project004-IPSHOCH-Exp5-ChIP-NPC-CTCF-IP-Blobel-Rep2-S1_S8_peakcall_MACS2_rendition_1E-8_downsampled_try3_peak_1572	169	9.46372	16.9833	14.126	78
chr1	172543386	172543660	Project004-IPSHOCH-Exp5-ChIP-NPC-CTCF-IP-Blobel-Rep2-S1_S8_peakcall_MACS2_rendition_1E-8_downsampled_try3_peak_1573	333	9.85714	33.3413	30.1428	158
chr1	172562520	172562869	Project004-IPSHOCH-Exp5-ChIP-NPC-CTCF-IP-Blobel-Rep2-S1_S8_peakcall_MACS2_rendition_1E-8_downsampled_try3_peak_1574	1283	45.8362	128.365	122.969	183
chr1	172769914	172770053	Project004-IPSHOCH-Exp5-ChIP-NPC-CTCF-IP-Blobel-Rep2-S1_S8_peakcall_MACS2_rendition_1E-8_downsampled_try3_peak_1575	187	9.66584	18.7417	15.8404	70
chr1	172802173	172802296	Project004-IPSHOCH-Exp5-ChIP-NPC-CTCF-IP-Blobel-Rep2-S1_S8_peakcall_MACS2_rendition_1E-8_downsampled_try3_peak_1576	93	6.32315	9.33567	6.69434	85
chr1	172815551	172815708	Project004-IPSHOCH-Exp5-ChIP-NPC-CTCF-IP-Blobel-Rep2-S1_S8_peakcall_MACS2_rendition_1E-8_downsampled_try3_peak_1577	418	10.5556	41.8076	38.4279	78
chr1	172825529	172825697	Project004-IPSHOCH-Exp5-ChIP-NPC-CTCF-IP-Blobel-Rep2-S1_S8_peakcall_MACS2_rendition_1E-8_downsampled_try3_peak_1578	144	6.875	14.4294	11.6384	62
chr1	172831004	172831247	Project004-IPSHOCH-Exp5-ChIP-NPC-CTCF-IP-Blobel-Rep2-S1_S8_peakcall_MACS2_rendition_1E-8_downsampled_try3_peak_1579	486	21.4676	48.6447	45.1017	86
chr1	172831791	172832026	Project004-IPSHOCH-Exp5-ChIP-NPC-CTCF-IP-Blobel-Rep2-S1_S8_peakcall_MACS2_rendition_1E-8_downsampled_try3_peak_1580	693	23.5135	69.35	65.3014	125
chr1	172922860	172923016	Project004-IPSHOCH-Exp5-ChIP-NPC-CTCF-IP-Blobel-Rep2-S1_S8_peakcall_MACS2_rendition_1E-8_downsampled_try3_peak_1581	273	13.8461	27.331	24.2518	58
chr1	172926964	172927200	Project004-IPSHOCH-Exp5-ChIP-NPC-CTCF-IP-Blobel-Rep2-S1_S8_peakcall_MACS2_rendition_1E-8_downsampled_try3_peak_1582	376	13.125	37.6986	34.3994	120
chr1	173000533	173000679	Project004-IPSHOCH-Exp5-ChIP-NPC-CTCF-IP-Blobel-Rep2-S1_S8_peakcall_MACS2_rendition_1E-8_downsampled_try3_peak_1583	226	11.0467	22.6215	19.6448	62
chr1	173008154	173008325	Project004-IPSHOCH-Exp5-ChIP-NPC-CTCF-IP-Blobel-Rep2-S1_S8_peakcall_MACS2_rendition_1E-8_downsampled_try3_peak_1584	256	11.4604	25.6276	22.5842	62
chr1	173041139	173041375	Project004-IPSHOCH-Exp5-ChIP-NPC-CTCF-IP-Blobel-Rep2-S1_S8_peakcall_MACS2_rendition_1E-8_downsampled_try3_peak_1585	623	18.75	62.3143	58.4451	137
chr1	173151040	173151221	Project004-IPSHOCH-Exp5-ChIP-NPC-CTCF-IP-Blobel-Rep2-S1_S8_peakcall_MACS2_rendition_1E-8_downsampled_try3_peak_1586	322	9.64286	32.242	29.0585	95
chr1	173152725	173152958	Project004-IPSHOCH-Exp5-ChIP-NPC-CTCF-IP-Blobel-Rep2-S1_S8_peakcall_MACS2_rendition_1E-8_downsampled_try3_peak_1587	254	11.3514	25.4413	22.3988	117
chr1	173168694	173168908	Project004-IPSHOCH-Exp5-ChIP-NPC-CTCF-IP-Blobel-Rep2-S1_S8_peakcall_MACS2_rendition_1E-8_downsampled_try3_peak_1588	334	13.7838	33.4333	30.2288	93
chr1	173177177	173177399	Project004-IPSHOCH-Exp5-ChIP-NPC-CTCF-IP-Blobel-Rep2-S1_S8_peakcall_MACS2_rendition_1E-8_downsampled_try3_peak_1589	469	15.3125	46.9413	43.4356	100
chr1	173187404	173187684	Project004-IPSHOCH-Exp5-ChIP-NPC-CTCF-IP-Blobel-Rep2-S1_S8_peakcall_MACS2_rendition_1E-8_downsampled_try3_peak_1590	648	24.491	64.8978	60.9594	114
chr1	173211831	173212101	Project004-IPSHOCH-Exp5-ChIP-NPC-CTCF-IP-Blobel-Rep2-S1_S8_peakcall_MACS2_rendition_1E-8_downsampled_try3_peak_1591	339	10.9322	33.9286	30.7076	156
chr1	173251645	173251846	Project004-IPSHOCH-Exp5-ChIP-NPC-CTCF-IP-Blobel-Rep2-S1_S8_peakcall_MACS2_rendition_1E-8_downsampled_try3_peak_1592	487	19.3317	48.7406	45.195	113
chr1	173286233	173286392	Project004-IPSHOCH-Exp5-ChIP-NPC-CTCF-IP-Blobel-Rep2-S1_S8_peakcall_MACS2_rendition_1E-8_downsampled_try3_peak_1593	277	13.7984	27.7932	24.7029	75
chr1	173288575	173288876	Project004-IPSHOCH-Exp5-ChIP-NPC-CTCF-IP-Blobel-Rep2-S1_S8_peakcall_MACS2_rendition_1E-8_downsampled_try3_peak_1594	789	30.6619	78.9593	74.6491	161
chr1	173291333	173291565	Project004-IPSHOCH-Exp5-ChIP-NPC-CTCF-IP-Blobel-Rep2-S1_S8_peakcall_MACS2_rendition_1E-8_downsampled_try3_peak_1595	499	14.2373	49.9306	46.3671	115
chr1	173310075	173310440	Project004-IPSHOCH-Exp5-ChIP-NPC-CTCF-IP-Blobel-Rep2-S1_S8_peakcall_MACS2_rendition_1E-8_downsampled_try3_peak_1596	677	23.1081	67.7527	63.7449	160
chr1	173317472	173317643	Project004-IPSHOCH-Exp5-ChIP-NPC-CTCF-IP-Blobel-Rep2-S1_S8_peakcall_MACS2_rendition_1E-8_downsampled_try3_peak_1597	233	12.1426	23.3799	20.3798	88
chr1	173400378	173400678	Project004-IPSHOCH-Exp5-ChIP-NPC-CTCF-IP-Blobel-Rep2-S1_S8_peakcall_MACS2_rendition_1E-8_downsampled_try3_peak_1598	305	15.0853	30.5622	27.4146	196
chr1	173409222	173409360	Project004-IPSHOCH-Exp5-ChIP-NPC-CTCF-IP-Blobel-Rep2-S1_S8_peakcall_MACS2_rendition_1E-8_downsampled_try3_peak_1599	168	8.51351	16.8225	13.9686	78
chr1	173431742	173431899	Project004-IPSHOCH-Exp5-ChIP-NPC-CTCF-IP-Blobel-Rep2-S1_S8_peakcall_MACS2_rendition_1E-8_downsampled_try3_peak_1600	197	8.4375	19.7116	16.7929	81
chr1	173432594	173432816	Project004-IPSHOCH-Exp5-ChIP-NPC-CTCF-IP-Blobel-Rep2-S1_S8_peakcall_MACS2_rendition_1E-8_downsampled_try3_peak_1601	600	25.033	60.0489	56.2347	114
chr1	173433480	173433685	Project004-IPSHOCH-Exp5-ChIP-NPC-CTCF-IP-Blobel-Rep2-S1_S8_peakcall_MACS2_rendition_1E-8_downsampled_try3_peak_1602	364	12.8125	36.4172	33.1474	121
chr1	173494466	173494703	Project004-IPSHOCH-Exp5-ChIP-NPC-CTCF-IP-Blobel-Rep2-S1_S8_peakcall_MACS2_rendition_1E-8_downsampled_try3_peak_1603	582	22.0933	58.2734	54.511	132
chr1	173497039	173497328	Project004-IPSHOCH-Exp5-ChIP-NPC-CTCF-IP-Blobel-Rep2-S1_S8_peakcall_MACS2_rendition_1E-8_downsampled_try3_peak_1604	230	9.375	23.0745	20.0771	118
chr1	173544256	173544380	Project004-IPSHOCH-Exp5-ChIP-NPC-CTCF-IP-Blobel-Rep2-S1_S8_peakcall_MACS2_rendition_1E-8_downsampled_try3_peak_1605	158	9.28328	15.8647	13.0259	47
chr1	173602721	173602844	Project004-IPSHOCH-Exp5-ChIP-NPC-CTCF-IP-Blobel-Rep2-S1_S8_peakcall_MACS2_rendition_1E-8_downsampled_try3_peak_1606	199	10.9615	19.9467	17.0228	59
chr1	173629218	173629447	Project004-IPSHOCH-Exp5-ChIP-NPC-CTCF-IP-Blobel-Rep2-S1_S8_peakcall_MACS2_rendition_1E-8_downsampled_try3_peak_1607	243	12.6923	24.3186	21.2979	111
chr1	173644253	173644474	Project004-IPSHOCH-Exp5-ChIP-NPC-CTCF-IP-Blobel-Rep2-S1_S8_peakcall_MACS2_rendition_1E-8_downsampled_try3_peak_1608	106	6.96246	10.6563	7.95844	13
chr1	173745998	173746190	Project004-IPSHOCH-Exp5-ChIP-NPC-CTCF-IP-Blobel-Rep2-S1_S8_peakcall_MACS2_rendition_1E-8_downsampled_try3_peak_1609	293	12.5676	29.3754	26.2484	114
chr1	173930907	173931114	Project004-IPSHOCH-Exp5-ChIP-NPC-CTCF-IP-Blobel-Rep2-S1_S8_peakcall_MACS2_rendition_1E-8_downsampled_try3_peak_1610	606	25.3846	60.6627	56.8336	102
chr1	173942226	173942460	Project004-IPSHOCH-Exp5-ChIP-NPC-CTCF-IP-Blobel-Rep2-S1_S8_peakcall_MACS2_rendition_1E-8_downsampled_try3_peak_1611	316	10.4237	31.6051	28.4388	112
chr1	173977090	173977303	Project004-IPSHOCH-Exp5-ChIP-NPC-CTCF-IP-Blobel-Rep2-S1_S8_peakcall_MACS2_rendition_1E-8_downsampled_try3_peak_1612	922	35.1923	92.2354	87.5823	106
chr1	174049928	174050128	Project004-IPSHOCH-Exp5-ChIP-NPC-CTCF-IP-Blobel-Rep2-S1_S8_peakcall_MACS2_rendition_1E-8_downsampled_try3_peak_1613	307	12.973	30.7148	27.5609	78
chr1	174059333	174059481	Project004-IPSHOCH-Exp5-ChIP-NPC-CTCF-IP-Blobel-Rep2-S1_S8_peakcall_MACS2_rendition_1E-8_downsampled_try3_peak_1614	214	11.6041	21.496	18.5379	57
chr1	174073765	174074007	Project004-IPSHOCH-Exp5-ChIP-NPC-CTCF-IP-Blobel-Rep2-S1_S8_peakcall_MACS2_rendition_1E-8_downsampled_try3_peak_1615	338	12.1875	33.886	30.6682	137
chr1	174092196	174092469	Project004-IPSHOCH-Exp5-ChIP-NPC-CTCF-IP-Blobel-Rep2-S1_S8_peakcall_MACS2_rendition_1E-8_downsampled_try3_peak_1616	397	18.2997	39.7582	36.4232	112
chr1	174119136	174119259	Project004-IPSHOCH-Exp5-ChIP-NPC-CTCF-IP-Blobel-Rep2-S1_S8_peakcall_MACS2_rendition_1E-8_downsampled_try3_peak_1617	175	7.8125	17.5473	14.6752	81
chr1	174147328	174147518	Project004-IPSHOCH-Exp5-ChIP-NPC-CTCF-IP-Blobel-Rep2-S1_S8_peakcall_MACS2_rendition_1E-8_downsampled_try3_peak_1618	270	9.40678	27.0855	24.0124	106
chr1	174177950	174178148	Project004-IPSHOCH-Exp5-ChIP-NPC-CTCF-IP-Blobel-Rep2-S1_S8_peakcall_MACS2_rendition_1E-8_downsampled_try3_peak_1619	583	20.6757	58.3323	54.5591	92
chr1	174239849	174240104	Project004-IPSHOCH-Exp5-ChIP-NPC-CTCF-IP-Blobel-Rep2-S1_S8_peakcall_MACS2_rendition_1E-8_downsampled_try3_peak_1620	564	15.5085	56.4493	52.7335	150
chr1	174240301	174240585	Project004-IPSHOCH-Exp5-ChIP-NPC-CTCF-IP-Blobel-Rep2-S1_S8_peakcall_MACS2_rendition_1E-8_downsampled_try3_peak_1621	755	21.5625	75.5477	71.3238	126
chr1	174254937	174255140	Project004-IPSHOCH-Exp5-ChIP-NPC-CTCF-IP-Blobel-Rep2-S1_S8_peakcall_MACS2_rendition_1E-8_downsampled_try3_peak_1622	411	12.4576	41.1311	37.7632	97
chr1	174256350	174256486	Project004-IPSHOCH-Exp5-ChIP-NPC-CTCF-IP-Blobel-Rep2-S1_S8_peakcall_MACS2_rendition_1E-8_downsampled_try3_peak_1623	208	8.75	20.8176	17.8726	96
chr1	174263710	174263964	Project004-IPSHOCH-Exp5-ChIP-NPC-CTCF-IP-Blobel-Rep2-S1_S8_peakcall_MACS2_rendition_1E-8_downsampled_try3_peak_1624	800	22.5	80.0747	75.7327	132
chr1	174287780	174288007	Project004-IPSHOCH-Exp5-ChIP-NPC-CTCF-IP-Blobel-Rep2-S1_S8_peakcall_MACS2_rendition_1E-8_downsampled_try3_peak_1625	614	21.4865	61.4404	57.5919	108
chr1	174294880	174295134	Project004-IPSHOCH-Exp5-ChIP-NPC-CTCF-IP-Blobel-Rep2-S1_S8_peakcall_MACS2_rendition_1E-8_downsampled_try3_peak_1626	623	18.75	62.3143	58.4451	98
chr1	174298996	174299236	Project004-IPSHOCH-Exp5-ChIP-NPC-CTCF-IP-Blobel-Rep2-S1_S8_peakcall_MACS2_rendition_1E-8_downsampled_try3_peak_1627	715	28.8462	71.5302	67.4151	117
chr1	174339215	174339460	Project004-IPSHOCH-Exp5-ChIP-NPC-CTCF-IP-Blobel-Rep2-S1_S8_peakcall_MACS2_rendition_1E-8_downsampled_try3_peak_1628	988	34.6351	98.8927	94.0735	117
chr1	174340950	174341178	Project004-IPSHOCH-Exp5-ChIP-NPC-CTCF-IP-Blobel-Rep2-S1_S8_peakcall_MACS2_rendition_1E-8_downsampled_try3_peak_1629	367	17.3077	36.7727	33.4966	144
chr1	174342458	174342649	Project004-IPSHOCH-Exp5-ChIP-NPC-CTCF-IP-Blobel-Rep2-S1_S8_peakcall_MACS2_rendition_1E-8_downsampled_try3_peak_1630	273	13.8461	27.331	24.2518	77
chr1	174412009	174412256	Project004-IPSHOCH-Exp5-ChIP-NPC-CTCF-IP-Blobel-Rep2-S1_S8_peakcall_MACS2_rendition_1E-8_downsampled_try3_peak_1631	503	22.0478	50.3653	46.7833	138
chr1	174420388	174420899	Project004-IPSHOCH-Exp5-ChIP-NPC-CTCF-IP-Blobel-Rep2-S1_S8_peakcall_MACS2_rendition_1E-8_downsampled_try3_peak_1632	1299	46.1538	129.945	124.522	330
chr1	174448255	174448412	Project004-IPSHOCH-Exp5-ChIP-NPC-CTCF-IP-Blobel-Rep2-S1_S8_peakcall_MACS2_rendition_1E-8_downsampled_try3_peak_1633	296	14.1956	29.6239	26.4943	95
chr1	174458814	174459179	Project004-IPSHOCH-Exp5-ChIP-NPC-CTCF-IP-Blobel-Rep2-S1_S8_peakcall_MACS2_rendition_1E-8_downsampled_try3_peak_1634	740	21.25	74.0511	69.8726	203
chr1	174492856	174493101	Project004-IPSHOCH-Exp5-ChIP-NPC-CTCF-IP-Blobel-Rep2-S1_S8_peakcall_MACS2_rendition_1E-8_downsampled_try3_peak_1635	320	13.3784	32.0676	28.8888	103
chr1	174493414	174493709	Project004-IPSHOCH-Exp5-ChIP-NPC-CTCF-IP-Blobel-Rep2-S1_S8_peakcall_MACS2_rendition_1E-8_downsampled_try3_peak_1636	507	18.6486	50.7125	47.1216	148
chr1	174524733	174524992	Project004-IPSHOCH-Exp5-ChIP-NPC-CTCF-IP-Blobel-Rep2-S1_S8_peakcall_MACS2_rendition_1E-8_downsampled_try3_peak_1637	418	19.1468	41.8815	38.4905	97
chr1	174543016	174543165	Project004-IPSHOCH-Exp5-ChIP-NPC-CTCF-IP-Blobel-Rep2-S1_S8_peakcall_MACS2_rendition_1E-8_downsampled_try3_peak_1638	243	12.6923	24.3186	21.2979	84
chr1	174549450	174549707	Project004-IPSHOCH-Exp5-ChIP-NPC-CTCF-IP-Blobel-Rep2-S1_S8_peakcall_MACS2_rendition_1E-8_downsampled_try3_peak_1639	1098	40.3846	109.821	104.768	102
chr1	174563240	174563554	Project004-IPSHOCH-Exp5-ChIP-NPC-CTCF-IP-Blobel-Rep2-S1_S8_peakcall_MACS2_rendition_1E-8_downsampled_try3_peak_1640	1027	31.6216	102.709	97.8012	164
chr1	174580698	174580894	Project004-IPSHOCH-Exp5-ChIP-NPC-CTCF-IP-Blobel-Rep2-S1_S8_peakcall_MACS2_rendition_1E-8_downsampled_try3_peak_1641	304	15	30.4143	27.2723	131
chr1	175254014	175254220	Project004-IPSHOCH-Exp5-ChIP-NPC-CTCF-IP-Blobel-Rep2-S1_S8_peakcall_MACS2_rendition_1E-8_downsampled_try3_peak_1642	484	21.3462	48.4326	44.9012	88
chr1	175269771	175269963	Project004-IPSHOCH-Exp5-ChIP-NPC-CTCF-IP-Blobel-Rep2-S1_S8_peakcall_MACS2_rendition_1E-8_downsampled_try3_peak_1643	200	11.0239	20.0537	17.1237	90
chr1	175307700	175307933	Project004-IPSHOCH-Exp5-ChIP-NPC-CTCF-IP-Blobel-Rep2-S1_S8_peakcall_MACS2_rendition_1E-8_downsampled_try3_peak_1644	773	30.7508	77.3881	73.1165	119
chr1	175328881	175329048	Project004-IPSHOCH-Exp5-ChIP-NPC-CTCF-IP-Blobel-Rep2-S1_S8_peakcall_MACS2_rendition_1E-8_downsampled_try3_peak_1645	241	10.9459	24.1597	21.1477	66
chr1	175386577	175386794	Project004-IPSHOCH-Exp5-ChIP-NPC-CTCF-IP-Blobel-Rep2-S1_S8_peakcall_MACS2_rendition_1E-8_downsampled_try3_peak_1646	637	19.0625	63.7575	59.8504	108
chr1	175783984	175784117	Project004-IPSHOCH-Exp5-ChIP-NPC-CTCF-IP-Blobel-Rep2-S1_S8_peakcall_MACS2_rendition_1E-8_downsampled_try3_peak_1647	157	9.23077	15.7752	12.9422	43
chr1	176034009	176034150	Project004-IPSHOCH-Exp5-ChIP-NPC-CTCF-IP-Blobel-Rep2-S1_S8_peakcall_MACS2_rendition_1E-8_downsampled_try3_peak_1648	185	10.3846	18.5323	15.6407	91
chr1	176396505	176396737	Project004-IPSHOCH-Exp5-ChIP-NPC-CTCF-IP-Blobel-Rep2-S1_S8_peakcall_MACS2_rendition_1E-8_downsampled_try3_peak_1649	334	13.7838	33.4333	30.2288	112
chr1	176399949	176400190	Project004-IPSHOCH-Exp5-ChIP-NPC-CTCF-IP-Blobel-Rep2-S1_S8_peakcall_MACS2_rendition_1E-8_downsampled_try3_peak_1650	566	17.5	56.6146	52.8939	109
chr1	176432762	176432967	Project004-IPSHOCH-Exp5-ChIP-NPC-CTCF-IP-Blobel-Rep2-S1_S8_peakcall_MACS2_rendition_1E-8_downsampled_try3_peak_1651	218	7.5	21.8106	18.844	82
chr1	176483854	176484017	Project004-IPSHOCH-Exp5-ChIP-NPC-CTCF-IP-Blobel-Rep2-S1_S8_peakcall_MACS2_rendition_1E-8_downsampled_try3_peak_1652	274	13.9249	27.4672	24.3835	81
chr1	176522662	176522838	Project004-IPSHOCH-Exp5-ChIP-NPC-CTCF-IP-Blobel-Rep2-S1_S8_peakcall_MACS2_rendition_1E-8_downsampled_try3_peak_1653	367	17.3077	36.7727	33.4966	94
chr1	176525123	176525447	Project004-IPSHOCH-Exp5-ChIP-NPC-CTCF-IP-Blobel-Rep2-S1_S8_peakcall_MACS2_rendition_1E-8_downsampled_try3_peak_1654	462	17.4324	46.2512	42.766	135
chr1	176848525	176848648	Project004-IPSHOCH-Exp5-ChIP-NPC-CTCF-IP-Blobel-Rep2-S1_S8_peakcall_MACS2_rendition_1E-8_downsampled_try3_peak_1655	132	8.12287	13.2009	10.4334	55
chr1	176930073	176930225	Project004-IPSHOCH-Exp5-ChIP-NPC-CTCF-IP-Blobel-Rep2-S1_S8_peakcall_MACS2_rendition_1E-8_downsampled_try3_peak_1656	299	13.2579	29.914	26.7835	68
chr1	176971664	176971849	Project004-IPSHOCH-Exp5-ChIP-NPC-CTCF-IP-Blobel-Rep2-S1_S8_peakcall_MACS2_rendition_1E-8_downsampled_try3_peak_1657	588	24.8077	58.8844	55.0979	80
chr1	177049122	177049606	Project004-IPSHOCH-Exp5-ChIP-NPC-CTCF-IP-Blobel-Rep2-S1_S8_peakcall_MACS2_rendition_1E-8_downsampled_try3_peak_1658	335	16.1538	33.5631	30.3543	325
chr1	177533559	177533783	Project004-IPSHOCH-Exp5-ChIP-NPC-CTCF-IP-Blobel-Rep2-S1_S8_peakcall_MACS2_rendition_1E-8_downsampled_try3_peak_1659	465	20.6939	46.5983	43.1119	116
chr1	177556106	177556386	Project004-IPSHOCH-Exp5-ChIP-NPC-CTCF-IP-Blobel-Rep2-S1_S8_peakcall_MACS2_rendition_1E-8_downsampled_try3_peak_1660	354	16.5581	35.4812	32.2299	163
chr1	177599240	177599406	Project004-IPSHOCH-Exp5-ChIP-NPC-CTCF-IP-Blobel-Rep2-S1_S8_peakcall_MACS2_rendition_1E-8_downsampled_try3_peak_1661	517	21.5563	51.7433	48.1389	97
chr1	177601868	177602019	Project004-IPSHOCH-Exp5-ChIP-NPC-CTCF-IP-Blobel-Rep2-S1_S8_peakcall_MACS2_rendition_1E-8_downsampled_try3_peak_1662	105	5.625	10.5451	7.86164	59
chr1	177797755	177798026	Project004-IPSHOCH-Exp5-ChIP-NPC-CTCF-IP-Blobel-Rep2-S1_S8_peakcall_MACS2_rendition_1E-8_downsampled_try3_peak_1663	370	17.1101	37.0635	33.7803	150
chr1	177854059	177854289	Project004-IPSHOCH-Exp5-ChIP-NPC-CTCF-IP-Blobel-Rep2-S1_S8_peakcall_MACS2_rendition_1E-8_downsampled_try3_peak_1664	681	24.855	68.1291	64.1078	118
chr1	177866642	177866842	Project004-IPSHOCH-Exp5-ChIP-NPC-CTCF-IP-Blobel-Rep2-S1_S8_peakcall_MACS2_rendition_1E-8_downsampled_try3_peak_1665	248	8.8983	24.8937	21.8632	103
chr1	178153361	178153652	Project004-IPSHOCH-Exp5-ChIP-NPC-CTCF-IP-Blobel-Rep2-S1_S8_peakcall_MACS2_rendition_1E-8_downsampled_try3_peak_1666	518	22.5	51.8733	48.2623	146
chr1	178588889	178589031	Project004-IPSHOCH-Exp5-ChIP-NPC-CTCF-IP-Blobel-Rep2-S1_S8_peakcall_MACS2_rendition_1E-8_downsampled_try3_peak_1667	214	11.6041	21.496	18.5379	85
chr1	178630019	178630208	Project004-IPSHOCH-Exp5-ChIP-NPC-CTCF-IP-Blobel-Rep2-S1_S8_peakcall_MACS2_rendition_1E-8_downsampled_try3_peak_1668	517	21.5563	51.7433	48.1389	76
chr1	178642618	178642870	Project004-IPSHOCH-Exp5-ChIP-NPC-CTCF-IP-Blobel-Rep2-S1_S8_peakcall_MACS2_rendition_1E-8_downsampled_try3_peak_1669	435	19.3178	43.5262	40.104	95
chr1	178792270	178792624	Project004-IPSHOCH-Exp5-ChIP-NPC-CTCF-IP-Blobel-Rep2-S1_S8_peakcall_MACS2_rendition_1E-8_downsampled_try3_peak_1670	1039	38.6538	103.901	98.9683	197
chr1	178807913	178808157	Project004-IPSHOCH-Exp5-ChIP-NPC-CTCF-IP-Blobel-Rep2-S1_S8_peakcall_MACS2_rendition_1E-8_downsampled_try3_peak_1671	462	17.4324	46.2512	42.766	121
chr1	178929323	178929460	Project004-IPSHOCH-Exp5-ChIP-NPC-CTCF-IP-Blobel-Rep2-S1_S8_peakcall_MACS2_rendition_1E-8_downsampled_try3_peak_1672	238	12.0925	23.8179	20.8126	61
chr1	179118901	179119260	Project004-IPSHOCH-Exp5-ChIP-NPC-CTCF-IP-Blobel-Rep2-S1_S8_peakcall_MACS2_rendition_1E-8_downsampled_try3_peak_1673	664	24.3947	66.4657	62.486	206
chr1	179350424	179350588	Project004-IPSHOCH-Exp5-ChIP-NPC-CTCF-IP-Blobel-Rep2-S1_S8_peakcall_MACS2_rendition_1E-8_downsampled_try3_peak_1674	123	6.89189	12.3237	9.58027	63
chr1	179615091	179615343	Project004-IPSHOCH-Exp5-ChIP-NPC-CTCF-IP-Blobel-Rep2-S1_S8_peakcall_MACS2_rendition_1E-8_downsampled_try3_peak_1675	582	22.5701	58.2566	54.4953	167
chr1	179633043	179633246	Project004-IPSHOCH-Exp5-ChIP-NPC-CTCF-IP-Blobel-Rep2-S1_S8_peakcall_MACS2_rendition_1E-8_downsampled_try3_peak_1676	351	11.1864	35.1054	31.869	138
chr1	179635467	179635590	Project004-IPSHOCH-Exp5-ChIP-NPC-CTCF-IP-Blobel-Rep2-S1_S8_peakcall_MACS2_rendition_1E-8_downsampled_try3_peak_1677	156	8.93796	15.682	12.8542	48
chr1	179737051	179737194	Project004-IPSHOCH-Exp5-ChIP-NPC-CTCF-IP-Blobel-Rep2-S1_S8_peakcall_MACS2_rendition_1E-8_downsampled_try3_peak_1678	158	9.28328	15.8647	13.0259	62
chr1	179776077	179776252	Project004-IPSHOCH-Exp5-ChIP-NPC-CTCF-IP-Blobel-Rep2-S1_S8_peakcall_MACS2_rendition_1E-8_downsampled_try3_peak_1679	185	10.3846	18.5323	15.6407	75
chr1	179870589	179870859	Project004-IPSHOCH-Exp5-ChIP-NPC-CTCF-IP-Blobel-Rep2-S1_S8_peakcall_MACS2_rendition_1E-8_downsampled_try3_peak_1680	827	25.9186	82.7767	78.3616	150
chr1	180003035	180003176	Project004-IPSHOCH-Exp5-ChIP-NPC-CTCF-IP-Blobel-Rep2-S1_S8_peakcall_MACS2_rendition_1E-8_downsampled_try3_peak_1681	191	9.32432	19.1965	16.2856	80
chr1	180076621	180076908	Project004-IPSHOCH-Exp5-ChIP-NPC-CTCF-IP-Blobel-Rep2-S1_S8_peakcall_MACS2_rendition_1E-8_downsampled_try3_peak_1682	983	31.4492	98.3832	93.5782	140
chr1	180118038	180118166	Project004-IPSHOCH-Exp5-ChIP-NPC-CTCF-IP-Blobel-Rep2-S1_S8_peakcall_MACS2_rendition_1E-8_downsampled_try3_peak_1683	124	6.25	12.4453	9.69904	23
chr1	180172367	180172537	Project004-IPSHOCH-Exp5-ChIP-NPC-CTCF-IP-Blobel-Rep2-S1_S8_peakcall_MACS2_rendition_1E-8_downsampled_try3_peak_1684	156	8.10811	15.6651	12.8402	102
chr1	180233624	180233843	Project004-IPSHOCH-Exp5-ChIP-NPC-CTCF-IP-Blobel-Rep2-S1_S8_peakcall_MACS2_rendition_1E-8_downsampled_try3_peak_1685	364	12.8125	36.4172	33.1474	102
chr1	180379450	180379638	Project004-IPSHOCH-Exp5-ChIP-NPC-CTCF-IP-Blobel-Rep2-S1_S8_peakcall_MACS2_rendition_1E-8_downsampled_try3_peak_1686	313	11.5625	31.3987	28.2354	79
chr1	180393901	180394208	Project004-IPSHOCH-Exp5-ChIP-NPC-CTCF-IP-Blobel-Rep2-S1_S8_peakcall_MACS2_rendition_1E-8_downsampled_try3_peak_1687	785	22.1875	78.5596	74.2598	147
chr1	180398461	180398674	Project004-IPSHOCH-Exp5-ChIP-NPC-CTCF-IP-Blobel-Rep2-S1_S8_peakcall_MACS2_rendition_1E-8_downsampled_try3_peak_1688	552	23.1814	55.2951	51.5951	101
chr1	180427059	180427286	Project004-IPSHOCH-Exp5-ChIP-NPC-CTCF-IP-Blobel-Rep2-S1_S8_peakcall_MACS2_rendition_1E-8_downsampled_try3_peak_1689	292	14.3504	29.2993	26.1796	106
chr1	180457306	180457523	Project004-IPSHOCH-Exp5-ChIP-NPC-CTCF-IP-Blobel-Rep2-S1_S8_peakcall_MACS2_rendition_1E-8_downsampled_try3_peak_1690	455	15	45.5931	42.1206	99
chr1	180460699	180460959	Project004-IPSHOCH-Exp5-ChIP-NPC-CTCF-IP-Blobel-Rep2-S1_S8_peakcall_MACS2_rendition_1E-8_downsampled_try3_peak_1691	538	16.875	53.8102	50.1444	160
chr1	180890485	180890785	Project004-IPSHOCH-Exp5-ChIP-NPC-CTCF-IP-Blobel-Rep2-S1_S8_peakcall_MACS2_rendition_1E-8_downsampled_try3_peak_1692	477	17.8378	47.7286	44.2084	119
chr1	181017308	181017431	Project004-IPSHOCH-Exp5-ChIP-NPC-CTCF-IP-Blobel-Rep2-S1_S8_peakcall_MACS2_rendition_1E-8_downsampled_try3_peak_1693	145	8.70307	14.5188	11.7163	44
chr1	181067356	181067492	Project004-IPSHOCH-Exp5-ChIP-NPC-CTCF-IP-Blobel-Rep2-S1_S8_peakcall_MACS2_rendition_1E-8_downsampled_try3_peak_1694	183	9.98948	18.3079	15.4213	62
chr1	181072424	181072594	Project004-IPSHOCH-Exp5-ChIP-NPC-CTCF-IP-Blobel-Rep2-S1_S8_peakcall_MACS2_rendition_1E-8_downsampled_try3_peak_1695	248	8.14286	24.8259	21.7984	77
chr1	181162246	181162489	Project004-IPSHOCH-Exp5-ChIP-NPC-CTCF-IP-Blobel-Rep2-S1_S8_peakcall_MACS2_rendition_1E-8_downsampled_try3_peak_1696	752	30	75.2234	71.0118	121
chr1	181243900	181244030	Project004-IPSHOCH-Exp5-ChIP-NPC-CTCF-IP-Blobel-Rep2-S1_S8_peakcall_MACS2_rendition_1E-8_downsampled_try3_peak_1697	102	5.08475	10.248	7.56918	45
chr1	181381500	181381625	Project004-IPSHOCH-Exp5-ChIP-NPC-CTCF-IP-Blobel-Rep2-S1_S8_peakcall_MACS2_rendition_1E-8_downsampled_try3_peak_1698	247	12.0054	24.7826	21.7556	63
chr1	181406796	181406921	Project004-IPSHOCH-Exp5-ChIP-NPC-CTCF-IP-Blobel-Rep2-S1_S8_peakcall_MACS2_rendition_1E-8_downsampled_try3_peak_1699	201	10.5411	20.1907	17.2592	41
chr1	181407286	181407450	Project004-IPSHOCH-Exp5-ChIP-NPC-CTCF-IP-Blobel-Rep2-S1_S8_peakcall_MACS2_rendition_1E-8_downsampled_try3_peak_1700	339	10.9322	33.9286	30.7076	89
chr1	181432786	181433030	Project004-IPSHOCH-Exp5-ChIP-NPC-CTCF-IP-Blobel-Rep2-S1_S8_peakcall_MACS2_rendition_1E-8_downsampled_try3_peak_1701	518	22.0775	51.8776	48.2644	142
chr1	181437091	181437347	Project004-IPSHOCH-Exp5-ChIP-NPC-CTCF-IP-Blobel-Rep2-S1_S8_peakcall_MACS2_rendition_1E-8_downsampled_try3_peak_1702	765	29.8046	76.5992	72.3515	141
chr1	181553858	181554050	Project004-IPSHOCH-Exp5-ChIP-NPC-CTCF-IP-Blobel-Rep2-S1_S8_peakcall_MACS2_rendition_1E-8_downsampled_try3_peak_1703	216	10.1351	21.6442	18.6794	108
chr1	181554590	181554787	Project004-IPSHOCH-Exp5-ChIP-NPC-CTCF-IP-Blobel-Rep2-S1_S8_peakcall_MACS2_rendition_1E-8_downsampled_try3_peak_1704	228	10.5405	22.8938	19.9053	94
chr1	181563554	181563729	Project004-IPSHOCH-Exp5-ChIP-NPC-CTCF-IP-Blobel-Rep2-S1_S8_peakcall_MACS2_rendition_1E-8_downsampled_try3_peak_1705	241	10.9459	24.1597	21.1477	99
chr1	181575835	181576074	Project004-IPSHOCH-Exp5-ChIP-NPC-CTCF-IP-Blobel-Rep2-S1_S8_peakcall_MACS2_rendition_1E-8_downsampled_try3_peak_1706	406	10.3704	40.6946	37.3309	141
chr1	181664660	181664866	Project004-IPSHOCH-Exp5-ChIP-NPC-CTCF-IP-Blobel-Rep2-S1_S8_peakcall_MACS2_rendition_1E-8_downsampled_try3_peak_1707	571	24.2308	57.116	53.3693	97
chr1	181665309	181665462	Project004-IPSHOCH-Exp5-ChIP-NPC-CTCF-IP-Blobel-Rep2-S1_S8_peakcall_MACS2_rendition_1E-8_downsampled_try3_peak_1708	244	12.7645	24.4431	21.4178	100
chr1	181775108	181775283	Project004-IPSHOCH-Exp5-ChIP-NPC-CTCF-IP-Blobel-Rep2-S1_S8_peakcall_MACS2_rendition_1E-8_downsampled_try3_peak_1709	280	12.1622	28.0497	24.9519	80
chr1	181777884	181778118	Project004-IPSHOCH-Exp5-ChIP-NPC-CTCF-IP-Blobel-Rep2-S1_S8_peakcall_MACS2_rendition_1E-8_downsampled_try3_peak_1710	304	10.1695	30.4589	27.3154	117
chr1	181783663	181783835	Project004-IPSHOCH-Exp5-ChIP-NPC-CTCF-IP-Blobel-Rep2-S1_S8_peakcall_MACS2_rendition_1E-8_downsampled_try3_peak_1711	588	24.8077	58.8844	55.0979	92
chr1	181789408	181789625	Project004-IPSHOCH-Exp5-ChIP-NPC-CTCF-IP-Blobel-Rep2-S1_S8_peakcall_MACS2_rendition_1E-8_downsampled_try3_peak_1712	741	28.3912	74.1667	69.9856	106
chr1	181859056	181859246	Project004-IPSHOCH-Exp5-ChIP-NPC-CTCF-IP-Blobel-Rep2-S1_S8_peakcall_MACS2_rendition_1E-8_downsampled_try3_peak_1713	263	13.2465	26.3042	23.2451	93
chr1	182046800	182046933	Project004-IPSHOCH-Exp5-ChIP-NPC-CTCF-IP-Blobel-Rep2-S1_S8_peakcall_MACS2_rendition_1E-8_downsampled_try3_peak_1714	219	9.0625	21.9387	18.9685	83
chr1	182105313	182105625	Project004-IPSHOCH-Exp5-ChIP-NPC-CTCF-IP-Blobel-Rep2-S1_S8_peakcall_MACS2_rendition_1E-8_downsampled_try3_peak_1715	320	13.3784	32.0676	28.8888	147
chr1	182145238	182145512	Project004-IPSHOCH-Exp5-ChIP-NPC-CTCF-IP-Blobel-Rep2-S1_S8_peakcall_MACS2_rendition_1E-8_downsampled_try3_peak_1716	693	23.5135	69.35	65.3014	153
chr1	182160855	182161026	Project004-IPSHOCH-Exp5-ChIP-NPC-CTCF-IP-Blobel-Rep2-S1_S8_peakcall_MACS2_rendition_1E-8_downsampled_try3_peak_1717	156	8.10811	15.6651	12.8402	84
chr1	182193775	182194008	Project004-IPSHOCH-Exp5-ChIP-NPC-CTCF-IP-Blobel-Rep2-S1_S8_peakcall_MACS2_rendition_1E-8_downsampled_try3_peak_1718	445	19.9126	44.5521	41.1109	153
chr1	182198741	182199131	Project004-IPSHOCH-Exp5-ChIP-NPC-CTCF-IP-Blobel-Rep2-S1_S8_peakcall_MACS2_rendition_1E-8_downsampled_try3_peak_1719	1401	40.1351	140.134	134.547	172
chr1	182259152	182259300	Project004-IPSHOCH-Exp5-ChIP-NPC-CTCF-IP-Blobel-Rep2-S1_S8_peakcall_MACS2_rendition_1E-8_downsampled_try3_peak_1720	181	9.6043	18.1455	15.2609	109
chr1	182317785	182317967	Project004-IPSHOCH-Exp5-ChIP-NPC-CTCF-IP-Blobel-Rep2-S1_S8_peakcall_MACS2_rendition_1E-8_downsampled_try3_peak_1721	228	7.71429	22.804	19.8254	66
chr1	182337325	182337502	Project004-IPSHOCH-Exp5-ChIP-NPC-CTCF-IP-Blobel-Rep2-S1_S8_peakcall_MACS2_rendition_1E-8_downsampled_try3_peak_1722	522	19.0541	52.2186	48.5899	88
chr1	182352278	182352604	Project004-IPSHOCH-Exp5-ChIP-NPC-CTCF-IP-Blobel-Rep2-S1_S8_peakcall_MACS2_rendition_1E-8_downsampled_try3_peak_1723	1035	37.9092	103.555	98.6363	177
chr1	182358564	182358787	Project004-IPSHOCH-Exp5-ChIP-NPC-CTCF-IP-Blobel-Rep2-S1_S8_peakcall_MACS2_rendition_1E-8_downsampled_try3_peak_1724	682	25.4514	68.2697	64.2401	100
chr1	182364355	182364601	Project004-IPSHOCH-Exp5-ChIP-NPC-CTCF-IP-Blobel-Rep2-S1_S8_peakcall_MACS2_rendition_1E-8_downsampled_try3_peak_1725	631	16.7797	63.1445	59.2529	125
chr1	182414196	182414516	Project004-IPSHOCH-Exp5-ChIP-NPC-CTCF-IP-Blobel-Rep2-S1_S8_peakcall_MACS2_rendition_1E-8_downsampled_try3_peak_1726	536	23.0769	53.6102	49.9576	151
chr1	182481062	182481283	Project004-IPSHOCH-Exp5-ChIP-NPC-CTCF-IP-Blobel-Rep2-S1_S8_peakcall_MACS2_rendition_1E-8_downsampled_try3_peak_1727	383	14.9996	38.3122	35.0088	74
chr1	182650502	182650755	Project004-IPSHOCH-Exp5-ChIP-NPC-CTCF-IP-Blobel-Rep2-S1_S8_peakcall_MACS2_rendition_1E-8_downsampled_try3_peak_1728	777	29.4427	77.7451	73.4609	133
chr1	182694115	182694394	Project004-IPSHOCH-Exp5-ChIP-NPC-CTCF-IP-Blobel-Rep2-S1_S8_peakcall_MACS2_rendition_1E-8_downsampled_try3_peak_1729	845	32.8846	84.5985	80.136	121
chr1	182698685	182698884	Project004-IPSHOCH-Exp5-ChIP-NPC-CTCF-IP-Blobel-Rep2-S1_S8_peakcall_MACS2_rendition_1E-8_downsampled_try3_peak_1730	411	14.9786	41.1506	37.7821	90
chr1	182704889	182705070	Project004-IPSHOCH-Exp5-ChIP-NPC-CTCF-IP-Blobel-Rep2-S1_S8_peakcall_MACS2_rendition_1E-8_downsampled_try3_peak_1731	206	10.1644	20.6068	17.6668	85
chr1	182707785	182707983	Project004-IPSHOCH-Exp5-ChIP-NPC-CTCF-IP-Blobel-Rep2-S1_S8_peakcall_MACS2_rendition_1E-8_downsampled_try3_peak_1732	254	11.3514	25.4413	22.3988	103
chr1	182741842	182742124	Project004-IPSHOCH-Exp5-ChIP-NPC-CTCF-IP-Blobel-Rep2-S1_S8_peakcall_MACS2_rendition_1E-8_downsampled_try3_peak_1733	280	12.1622	28.0497	24.9519	68
chr1	182793873	182794096	Project004-IPSHOCH-Exp5-ChIP-NPC-CTCF-IP-Blobel-Rep2-S1_S8_peakcall_MACS2_rendition_1E-8_downsampled_try3_peak_1734	552	23.1814	55.2951	51.5951	101
chr1	182804225	182804464	Project004-IPSHOCH-Exp5-ChIP-NPC-CTCF-IP-Blobel-Rep2-S1_S8_peakcall_MACS2_rendition_1E-8_downsampled_try3_peak_1735	719	27.1057	71.97	67.8425	100
chr1	182820085	182820251	Project004-IPSHOCH-Exp5-ChIP-NPC-CTCF-IP-Blobel-Rep2-S1_S8_peakcall_MACS2_rendition_1E-8_downsampled_try3_peak_1736	201	10.5411	20.1907	17.2592	47
chr1	182831253	182831557	Project004-IPSHOCH-Exp5-ChIP-NPC-CTCF-IP-Blobel-Rep2-S1_S8_peakcall_MACS2_rendition_1E-8_downsampled_try3_peak_1737	441	17.9508	44.1091	40.6737	196
chr1	182841302	182841494	Project004-IPSHOCH-Exp5-ChIP-NPC-CTCF-IP-Blobel-Rep2-S1_S8_peakcall_MACS2_rendition_1E-8_downsampled_try3_peak_1738	305	15.0853	30.5622	27.4146	93
chr1	182849915	182850156	Project004-IPSHOCH-Exp5-ChIP-NPC-CTCF-IP-Blobel-Rep2-S1_S8_peakcall_MACS2_rendition_1E-8_downsampled_try3_peak_1739	353	16.8259	35.3259	32.0766	77
chr1	182904608	182904838	Project004-IPSHOCH-Exp5-ChIP-NPC-CTCF-IP-Blobel-Rep2-S1_S8_peakcall_MACS2_rendition_1E-8_downsampled_try3_peak_1740	652	19.375	65.2077	61.2614	108
chr1	182906532	182906753	Project004-IPSHOCH-Exp5-ChIP-NPC-CTCF-IP-Blobel-Rep2-S1_S8_peakcall_MACS2_rendition_1E-8_downsampled_try3_peak_1741	663	27.2696	66.3259	62.3491	113
chr1	182910674	182910860	Project004-IPSHOCH-Exp5-ChIP-NPC-CTCF-IP-Blobel-Rep2-S1_S8_peakcall_MACS2_rendition_1E-8_downsampled_try3_peak_1742	484	20.5047	48.4384	44.9052	114
chr1	182917991	182918239	Project004-IPSHOCH-Exp5-ChIP-NPC-CTCF-IP-Blobel-Rep2-S1_S8_peakcall_MACS2_rendition_1E-8_downsampled_try3_peak_1743	803	29.9265	80.3817	76.0335	132
chr1	182922338	182922538	Project004-IPSHOCH-Exp5-ChIP-NPC-CTCF-IP-Blobel-Rep2-S1_S8_peakcall_MACS2_rendition_1E-8_downsampled_try3_peak_1744	344	15.5607	34.4377	31.2121	103
chr1	182952442	182952747	Project004-IPSHOCH-Exp5-ChIP-NPC-CTCF-IP-Blobel-Rep2-S1_S8_peakcall_MACS2_rendition_1E-8_downsampled_try3_peak_1745	482	15.625	48.2983	44.7729	132
chr1	182969723	182970005	Project004-IPSHOCH-Exp5-ChIP-NPC-CTCF-IP-Blobel-Rep2-S1_S8_peakcall_MACS2_rendition_1E-8_downsampled_try3_peak_1746	980	36.9231	98.0377	93.2367	171
chr1	182979697	182979847	Project004-IPSHOCH-Exp5-ChIP-NPC-CTCF-IP-Blobel-Rep2-S1_S8_peakcall_MACS2_rendition_1E-8_downsampled_try3_peak_1747	308	14.9023	30.8217	27.6659	93
chr1	183003332	183003462	Project004-IPSHOCH-Exp5-ChIP-NPC-CTCF-IP-Blobel-Rep2-S1_S8_peakcall_MACS2_rendition_1E-8_downsampled_try3_peak_1748	186	10.4437	18.6335	15.7332	71
chr1	183162952	183163141	Project004-IPSHOCH-Exp5-ChIP-NPC-CTCF-IP-Blobel-Rep2-S1_S8_peakcall_MACS2_rendition_1E-8_downsampled_try3_peak_1749	392	16.8075	39.2675	35.9351	87
chr1	183203078	183203307	Project004-IPSHOCH-Exp5-ChIP-NPC-CTCF-IP-Blobel-Rep2-S1_S8_peakcall_MACS2_rendition_1E-8_downsampled_try3_peak_1750	700	18.0509	70.0029	65.9255	108
chr1	183309855	183310048	Project004-IPSHOCH-Exp5-ChIP-NPC-CTCF-IP-Blobel-Rep2-S1_S8_peakcall_MACS2_rendition_1E-8_downsampled_try3_peak_1751	379	17.6369	37.9696	34.668	76
chr1	183375860	183376041	Project004-IPSHOCH-Exp5-ChIP-NPC-CTCF-IP-Blobel-Rep2-S1_S8_peakcall_MACS2_rendition_1E-8_downsampled_try3_peak_1752	299	14.0548	29.9952	26.8632	92
chr1	183395266	183395391	Project004-IPSHOCH-Exp5-ChIP-NPC-CTCF-IP-Blobel-Rep2-S1_S8_peakcall_MACS2_rendition_1E-8_downsampled_try3_peak_1753	188	8.84369	18.8912	15.988	45
chr1	183449397	183449576	Project004-IPSHOCH-Exp5-ChIP-NPC-CTCF-IP-Blobel-Rep2-S1_S8_peakcall_MACS2_rendition_1E-8_downsampled_try3_peak_1754	256	12.5489	25.6897	22.6451	77
chr1	183474212	183474455	Project004-IPSHOCH-Exp5-ChIP-NPC-CTCF-IP-Blobel-Rep2-S1_S8_peakcall_MACS2_rendition_1E-8_downsampled_try3_peak_1755	310	8.7037	31.0396	27.8827	122
chr1	183475608	183475859	Project004-IPSHOCH-Exp5-ChIP-NPC-CTCF-IP-Blobel-Rep2-S1_S8_peakcall_MACS2_rendition_1E-8_downsampled_try3_peak_1756	411	12.4576	41.1311	37.7632	133
chr1	183546408	183546610	Project004-IPSHOCH-Exp5-ChIP-NPC-CTCF-IP-Blobel-Rep2-S1_S8_peakcall_MACS2_rendition_1E-8_downsampled_try3_peak_1757	580	17.8125	58.0283	54.2689	100
chr1	183547533	183547784	Project004-IPSHOCH-Exp5-ChIP-NPC-CTCF-IP-Blobel-Rep2-S1_S8_peakcall_MACS2_rendition_1E-8_downsampled_try3_peak_1758	520	22.628	52.0971	48.4764	135
chr1	183658946	183659072	Project004-IPSHOCH-Exp5-ChIP-NPC-CTCF-IP-Blobel-Rep2-S1_S8_peakcall_MACS2_rendition_1E-8_downsampled_try3_peak_1759	185	10.3846	18.5323	15.6407	66
chr1	183757828	183757999	Project004-IPSHOCH-Exp5-ChIP-NPC-CTCF-IP-Blobel-Rep2-S1_S8_peakcall_MACS2_rendition_1E-8_downsampled_try3_peak_1760	191	9.32432	19.1965	16.2856	91
chr1	183811837	183812037	Project004-IPSHOCH-Exp5-ChIP-NPC-CTCF-IP-Blobel-Rep2-S1_S8_peakcall_MACS2_rendition_1E-8_downsampled_try3_peak_1761	401	11.1429	40.1258	36.7832	90
chr1	183818828	183819353	Project004-IPSHOCH-Exp5-ChIP-NPC-CTCF-IP-Blobel-Rep2-S1_S8_peakcall_MACS2_rendition_1E-8_downsampled_try3_peak_1762	1891	50.6757	189.115	182.675	287
chr1	184045454	184045697	Project004-IPSHOCH-Exp5-ChIP-NPC-CTCF-IP-Blobel-Rep2-S1_S8_peakcall_MACS2_rendition_1E-8_downsampled_try3_peak_1763	467	16.4051	46.7202	43.2335	107
chr1	184045904	184046143	Project004-IPSHOCH-Exp5-ChIP-NPC-CTCF-IP-Blobel-Rep2-S1_S8_peakcall_MACS2_rendition_1E-8_downsampled_try3_peak_1764	374	11.6949	37.4879	34.1992	119
chr1	184054617	184054939	Project004-IPSHOCH-Exp5-ChIP-NPC-CTCF-IP-Blobel-Rep2-S1_S8_peakcall_MACS2_rendition_1E-8_downsampled_try3_peak_1765	1076	30.9529	107.603	102.602	162
chr1	184061086	184061215	Project004-IPSHOCH-Exp5-ChIP-NPC-CTCF-IP-Blobel-Rep2-S1_S8_peakcall_MACS2_rendition_1E-8_downsampled_try3_peak_1766	102	5.08475	10.248	7.56918	82
chr1	184070534	184070869	Project004-IPSHOCH-Exp5-ChIP-NPC-CTCF-IP-Blobel-Rep2-S1_S8_peakcall_MACS2_rendition_1E-8_downsampled_try3_peak_1767	765	29.8046	76.5992	72.3515	214
chr1	184080160	184080436	Project004-IPSHOCH-Exp5-ChIP-NPC-CTCF-IP-Blobel-Rep2-S1_S8_peakcall_MACS2_rendition_1E-8_downsampled_try3_peak_1768	451	19.4532	45.1774	41.7168	106
chr1	184241654	184241777	Project004-IPSHOCH-Exp5-ChIP-NPC-CTCF-IP-Blobel-Rep2-S1_S8_peakcall_MACS2_rendition_1E-8_downsampled_try3_peak_1769	165	9.4773	16.5815	13.7344	54
chr1	184306412	184306591	Project004-IPSHOCH-Exp5-ChIP-NPC-CTCF-IP-Blobel-Rep2-S1_S8_peakcall_MACS2_rendition_1E-8_downsampled_try3_peak_1770	307	12.973	30.7148	27.5609	72
chr1	184419870	184420310	Project004-IPSHOCH-Exp5-ChIP-NPC-CTCF-IP-Blobel-Rep2-S1_S8_peakcall_MACS2_rendition_1E-8_downsampled_try3_peak_1771	655	21.3723	65.533	61.5828	136
chr1	184447673	184447875	Project004-IPSHOCH-Exp5-ChIP-NPC-CTCF-IP-Blobel-Rep2-S1_S8_peakcall_MACS2_rendition_1E-8_downsampled_try3_peak_1772	253	10	25.3882	22.3512	85
chr1	184469607	184469793	Project004-IPSHOCH-Exp5-ChIP-NPC-CTCF-IP-Blobel-Rep2-S1_S8_peakcall_MACS2_rendition_1E-8_downsampled_try3_peak_1773	265	10.3125	26.5652	23.5028	90
chr1	184484204	184484386	Project004-IPSHOCH-Exp5-ChIP-NPC-CTCF-IP-Blobel-Rep2-S1_S8_peakcall_MACS2_rendition_1E-8_downsampled_try3_peak_1774	555	23.7884	55.5934	51.8816	92
chr1	184490442	184490730	Project004-IPSHOCH-Exp5-ChIP-NPC-CTCF-IP-Blobel-Rep2-S1_S8_peakcall_MACS2_rendition_1E-8_downsampled_try3_peak_1775	290	9	29.0021	25.8891	178
chr1	184494639	184494793	Project004-IPSHOCH-Exp5-ChIP-NPC-CTCF-IP-Blobel-Rep2-S1_S8_peakcall_MACS2_rendition_1E-8_downsampled_try3_peak_1776	214	11.6041	21.496	18.5379	92
chr1	184587995	184588213	Project004-IPSHOCH-Exp5-ChIP-NPC-CTCF-IP-Blobel-Rep2-S1_S8_peakcall_MACS2_rendition_1E-8_downsampled_try3_peak_1777	714	25.7756	71.4797	67.372	118
chr1	184722703	184722851	Project004-IPSHOCH-Exp5-ChIP-NPC-CTCF-IP-Blobel-Rep2-S1_S8_peakcall_MACS2_rendition_1E-8_downsampled_try3_peak_1778	305	15.0853	30.5622	27.4146	83
chr1	184798631	184798801	Project004-IPSHOCH-Exp5-ChIP-NPC-CTCF-IP-Blobel-Rep2-S1_S8_peakcall_MACS2_rendition_1E-8_downsampled_try3_peak_1779	205	11.0388	20.5326	17.5936	70
chr1	184825922	184826120	Project004-IPSHOCH-Exp5-ChIP-NPC-CTCF-IP-Blobel-Rep2-S1_S8_peakcall_MACS2_rendition_1E-8_downsampled_try3_peak_1780	258	13.2692	25.8156	22.7667	91
chr1	184890235	184890625	Project004-IPSHOCH-Exp5-ChIP-NPC-CTCF-IP-Blobel-Rep2-S1_S8_peakcall_MACS2_rendition_1E-8_downsampled_try3_peak_1781	545	13.7143	54.5573	50.882	229
chr1	184913203	184913339	Project004-IPSHOCH-Exp5-ChIP-NPC-CTCF-IP-Blobel-Rep2-S1_S8_peakcall_MACS2_rendition_1E-8_downsampled_try3_peak_1782	179	8.91892	17.9999	15.1172	81
chr1	184921104	184921420	Project004-IPSHOCH-Exp5-ChIP-NPC-CTCF-IP-Blobel-Rep2-S1_S8_peakcall_MACS2_rendition_1E-8_downsampled_try3_peak_1783	924	29.1892	92.4393	87.7722	133
chr1	185481007	185481260	Project004-IPSHOCH-Exp5-ChIP-NPC-CTCF-IP-Blobel-Rep2-S1_S8_peakcall_MACS2_rendition_1E-8_downsampled_try3_peak_1784	477	17.8378	47.7286	44.2084	109
chr1	185857671	185857862	Project004-IPSHOCH-Exp5-ChIP-NPC-CTCF-IP-Blobel-Rep2-S1_S8_peakcall_MACS2_rendition_1E-8_downsampled_try3_peak_1785	239	11.5069	23.9511	20.9451	70
chr1	186059503	186059803	Project004-IPSHOCH-Exp5-ChIP-NPC-CTCF-IP-Blobel-Rep2-S1_S8_peakcall_MACS2_rendition_1E-8_downsampled_try3_peak_1786	709	23.9189	70.9547	66.8607	171
chr1	186089968	186090298	Project004-IPSHOCH-Exp5-ChIP-NPC-CTCF-IP-Blobel-Rep2-S1_S8_peakcall_MACS2_rendition_1E-8_downsampled_try3_peak_1787	608	18.4375	60.8783	57.0443	177
chr1	186202649	186202798	Project004-IPSHOCH-Exp5-ChIP-NPC-CTCF-IP-Blobel-Rep2-S1_S8_peakcall_MACS2_rendition_1E-8_downsampled_try3_peak_1788	171	9.80769	17.1414	14.2785	68
chr1	186219198	186219352	Project004-IPSHOCH-Exp5-ChIP-NPC-CTCF-IP-Blobel-Rep2-S1_S8_peakcall_MACS2_rendition_1E-8_downsampled_try3_peak_1789	191	9.32432	19.1965	16.2856	105
chr1	186271897	186272086	Project004-IPSHOCH-Exp5-ChIP-NPC-CTCF-IP-Blobel-Rep2-S1_S8_peakcall_MACS2_rendition_1E-8_downsampled_try3_peak_1790	302	14.1832	30.2107	27.0743	97
chr1	186561878	186562085	Project004-IPSHOCH-Exp5-ChIP-NPC-CTCF-IP-Blobel-Rep2-S1_S8_peakcall_MACS2_rendition_1E-8_downsampled_try3_peak_1791	537	19.4595	53.7338	50.0722	99
chr1	186595561	186595818	Project004-IPSHOCH-Exp5-ChIP-NPC-CTCF-IP-Blobel-Rep2-S1_S8_peakcall_MACS2_rendition_1E-8_downsampled_try3_peak_1792	573	24.3686	57.3574	53.6053	117
chr1	186615036	186615262	Project004-IPSHOCH-Exp5-ChIP-NPC-CTCF-IP-Blobel-Rep2-S1_S8_peakcall_MACS2_rendition_1E-8_downsampled_try3_peak_1793	274	13.9249	27.4672	24.3835	122
chr1	186648497	186648779	Project004-IPSHOCH-Exp5-ChIP-NPC-CTCF-IP-Blobel-Rep2-S1_S8_peakcall_MACS2_rendition_1E-8_downsampled_try3_peak_1794	839	32.0124	83.9697	79.5301	115
chr1	186648902	186649300	Project004-IPSHOCH-Exp5-ChIP-NPC-CTCF-IP-Blobel-Rep2-S1_S8_peakcall_MACS2_rendition_1E-8_downsampled_try3_peak_1795	591	24.9488	59.1316	55.3381	284
chr1	186676257	186676483	Project004-IPSHOCH-Exp5-ChIP-NPC-CTCF-IP-Blobel-Rep2-S1_S8_peakcall_MACS2_rendition_1E-8_downsampled_try3_peak_1796	416	19.0385	41.6928	38.3138	107
chr1	186677185	186677425	Project004-IPSHOCH-Exp5-ChIP-NPC-CTCF-IP-Blobel-Rep2-S1_S8_peakcall_MACS2_rendition_1E-8_downsampled_try3_peak_1797	699	28.43	69.9786	65.9033	146
chr1	186706907	186707046	Project004-IPSHOCH-Exp5-ChIP-NPC-CTCF-IP-Blobel-Rep2-S1_S8_peakcall_MACS2_rendition_1E-8_downsampled_try3_peak_1798	233	12.1426	23.3799	20.3798	51
chr1	186742472	186742609	Project004-IPSHOCH-Exp5-ChIP-NPC-CTCF-IP-Blobel-Rep2-S1_S8_peakcall_MACS2_rendition_1E-8_downsampled_try3_peak_1799	158	9.28328	15.8647	13.0259	98
chr1	186789599	186789746	Project004-IPSHOCH-Exp5-ChIP-NPC-CTCF-IP-Blobel-Rep2-S1_S8_peakcall_MACS2_rendition_1E-8_downsampled_try3_peak_1800	244	11.4902	24.4986	21.4727	67
chr1	187011311	187011539	Project004-IPSHOCH-Exp5-ChIP-NPC-CTCF-IP-Blobel-Rep2-S1_S8_peakcall_MACS2_rendition_1E-8_downsampled_try3_peak_1801	370	15.4676	37.0005	33.7191	112
chr1	187017599	187017839	Project004-IPSHOCH-Exp5-ChIP-NPC-CTCF-IP-Blobel-Rep2-S1_S8_peakcall_MACS2_rendition_1E-8_downsampled_try3_peak_1802	538	15	53.8199	50.1519	102
chr1	187228046	187228227	Project004-IPSHOCH-Exp5-ChIP-NPC-CTCF-IP-Blobel-Rep2-S1_S8_peakcall_MACS2_rendition_1E-8_downsampled_try3_peak_1803	418	19.1468	41.8815	38.4905	87
chr1	187233846	187234001	Project004-IPSHOCH-Exp5-ChIP-NPC-CTCF-IP-Blobel-Rep2-S1_S8_peakcall_MACS2_rendition_1E-8_downsampled_try3_peak_1804	244	12.7645	24.4431	21.4178	66
chr1	187325890	187326078	Project004-IPSHOCH-Exp5-ChIP-NPC-CTCF-IP-Blobel-Rep2-S1_S8_peakcall_MACS2_rendition_1E-8_downsampled_try3_peak_1805	524	16.5625	52.4199	48.7864	92
chr1	187341495	187341748	Project004-IPSHOCH-Exp5-ChIP-NPC-CTCF-IP-Blobel-Rep2-S1_S8_peakcall_MACS2_rendition_1E-8_downsampled_try3_peak_1806	433	16.6216	43.3264	39.9111	168
chr1	187370219	187370448	Project004-IPSHOCH-Exp5-ChIP-NPC-CTCF-IP-Blobel-Rep2-S1_S8_peakcall_MACS2_rendition_1E-8_downsampled_try3_peak_1807	433	16.6216	43.3264	39.9111	122
chr1	187505867	187506117	Project004-IPSHOCH-Exp5-ChIP-NPC-CTCF-IP-Blobel-Rep2-S1_S8_peakcall_MACS2_rendition_1E-8_downsampled_try3_peak_1808	637	19.0625	63.7575	59.8504	110
chr1	187920906	187921033	Project004-IPSHOCH-Exp5-ChIP-NPC-CTCF-IP-Blobel-Rep2-S1_S8_peakcall_MACS2_rendition_1E-8_downsampled_try3_peak_1809	144	8.65385	14.4351	11.6391	70
chr1	188006533	188006709	Project004-IPSHOCH-Exp5-ChIP-NPC-CTCF-IP-Blobel-Rep2-S1_S8_peakcall_MACS2_rendition_1E-8_downsampled_try3_peak_1810	194	10.0845	19.4344	16.5213	109
chr1	188216961	188217138	Project004-IPSHOCH-Exp5-ChIP-NPC-CTCF-IP-Blobel-Rep2-S1_S8_peakcall_MACS2_rendition_1E-8_downsampled_try3_peak_1811	290	14.5051	29.0062	25.8892	99
chr1	188280104	188280229	Project004-IPSHOCH-Exp5-ChIP-NPC-CTCF-IP-Blobel-Rep2-S1_S8_peakcall_MACS2_rendition_1E-8_downsampled_try3_peak_1812	156	6.61017	15.6784	12.8526	69
chr1	188374241	188374451	Project004-IPSHOCH-Exp5-ChIP-NPC-CTCF-IP-Blobel-Rep2-S1_S8_peakcall_MACS2_rendition_1E-8_downsampled_try3_peak_1813	124	6.25	12.4453	9.69904	110
chr1	188478923	188479154	Project004-IPSHOCH-Exp5-ChIP-NPC-CTCF-IP-Blobel-Rep2-S1_S8_peakcall_MACS2_rendition_1E-8_downsampled_try3_peak_1814	310	15.0522	31.0776	27.9206	114
chr1	188536783	188536946	Project004-IPSHOCH-Exp5-ChIP-NPC-CTCF-IP-Blobel-Rep2-S1_S8_peakcall_MACS2_rendition_1E-8_downsampled_try3_peak_1815	208	8.75	20.8176	17.8726	86
chr1	188545866	188546184	Project004-IPSHOCH-Exp5-ChIP-NPC-CTCF-IP-Blobel-Rep2-S1_S8_peakcall_MACS2_rendition_1E-8_downsampled_try3_peak_1816	524	16.5625	52.4199	48.7864	159
chr1	188651698	188651944	Project004-IPSHOCH-Exp5-ChIP-NPC-CTCF-IP-Blobel-Rep2-S1_S8_peakcall_MACS2_rendition_1E-8_downsampled_try3_peak_1817	840	27.1622	84.0452	79.5967	112
chr1	188783400	188783571	Project004-IPSHOCH-Exp5-ChIP-NPC-CTCF-IP-Blobel-Rep2-S1_S8_peakcall_MACS2_rendition_1E-8_downsampled_try3_peak_1818	243	12.6923	24.3186	21.2979	98
chr1	188855707	188855950	Project004-IPSHOCH-Exp5-ChIP-NPC-CTCF-IP-Blobel-Rep2-S1_S8_peakcall_MACS2_rendition_1E-8_downsampled_try3_peak_1819	455	15	45.5931	42.1206	94
chr1	188961458	188961648	Project004-IPSHOCH-Exp5-ChIP-NPC-CTCF-IP-Blobel-Rep2-S1_S8_peakcall_MACS2_rendition_1E-8_downsampled_try3_peak_1820	540	19.6464	54.06	50.3866	99
chr1	189272097	189272339	Project004-IPSHOCH-Exp5-ChIP-NPC-CTCF-IP-Blobel-Rep2-S1_S8_peakcall_MACS2_rendition_1E-8_downsampled_try3_peak_1821	614	21.4865	61.4404	57.5919	113
chr1	189276188	189276367	Project004-IPSHOCH-Exp5-ChIP-NPC-CTCF-IP-Blobel-Rep2-S1_S8_peakcall_MACS2_rendition_1E-8_downsampled_try3_peak_1822	337	16.2457	33.7226	30.5085	91
chr1	189278421	189278599	Project004-IPSHOCH-Exp5-ChIP-NPC-CTCF-IP-Blobel-Rep2-S1_S8_peakcall_MACS2_rendition_1E-8_downsampled_try3_peak_1823	259	13.3447	25.9459	22.8918	70
chr1	189798446	189798643	Project004-IPSHOCH-Exp5-ChIP-NPC-CTCF-IP-Blobel-Rep2-S1_S8_peakcall_MACS2_rendition_1E-8_downsampled_try3_peak_1824	418	16.2162	41.8796	38.4905	84
chr1	190271966	190272131	Project004-IPSHOCH-Exp5-ChIP-NPC-CTCF-IP-Blobel-Rep2-S1_S8_peakcall_MACS2_rendition_1E-8_downsampled_try3_peak_1825	157	9.23077	15.7752	12.9422	60
chr1	190457737	190457878	Project004-IPSHOCH-Exp5-ChIP-NPC-CTCF-IP-Blobel-Rep2-S1_S8_peakcall_MACS2_rendition_1E-8_downsampled_try3_peak_1826	228	10.5405	22.8938	19.9053	71
chr1	190629077	190629250	Project004-IPSHOCH-Exp5-ChIP-NPC-CTCF-IP-Blobel-Rep2-S1_S8_peakcall_MACS2_rendition_1E-8_downsampled_try3_peak_1827	392	16.8075	39.2675	35.9351	68
chr1	190728098	190728229	Project004-IPSHOCH-Exp5-ChIP-NPC-CTCF-IP-Blobel-Rep2-S1_S8_peakcall_MACS2_rendition_1E-8_downsampled_try3_peak_1828	204	9.72973	20.4115	17.4743	92
chr1	190771710	190772042	Project004-IPSHOCH-Exp5-ChIP-NPC-CTCF-IP-Blobel-Rep2-S1_S8_peakcall_MACS2_rendition_1E-8_downsampled_try3_peak_1829	274	13.9249	27.4672	24.3835	156
chr1	190804020	190804200	Project004-IPSHOCH-Exp5-ChIP-NPC-CTCF-IP-Blobel-Rep2-S1_S8_peakcall_MACS2_rendition_1E-8_downsampled_try3_peak_1830	338	12.1875	33.886	30.6682	76
chr1	190817125	190817306	Project004-IPSHOCH-Exp5-ChIP-NPC-CTCF-IP-Blobel-Rep2-S1_S8_peakcall_MACS2_rendition_1E-8_downsampled_try3_peak_1831	267	11.7568	26.7382	23.6677	94
chr1	190847206	190847400	Project004-IPSHOCH-Exp5-ChIP-NPC-CTCF-IP-Blobel-Rep2-S1_S8_peakcall_MACS2_rendition_1E-8_downsampled_try3_peak_1832	376	13.125	37.6986	34.3994	92
chr1	190850925	190851070	Project004-IPSHOCH-Exp5-ChIP-NPC-CTCF-IP-Blobel-Rep2-S1_S8_peakcall_MACS2_rendition_1E-8_downsampled_try3_peak_1833	265	10.3125	26.5652	23.5028	49
chr1	190852189	190852408	Project004-IPSHOCH-Exp5-ChIP-NPC-CTCF-IP-Blobel-Rep2-S1_S8_peakcall_MACS2_rendition_1E-8_downsampled_try3_peak_1834	320	13.3784	32.0676	28.8888	116
chr1	190904775	190904941	Project004-IPSHOCH-Exp5-ChIP-NPC-CTCF-IP-Blobel-Rep2-S1_S8_peakcall_MACS2_rendition_1E-8_downsampled_try3_peak_1835	186	10.4437	18.6335	15.7332	89
chr1	191051493	191051632	Project004-IPSHOCH-Exp5-ChIP-NPC-CTCF-IP-Blobel-Rep2-S1_S8_peakcall_MACS2_rendition_1E-8_downsampled_try3_peak_1836	341	15.7729	34.1464	30.9231	93
chr1	191139886	191140033	Project004-IPSHOCH-Exp5-ChIP-NPC-CTCF-IP-Blobel-Rep2-S1_S8_peakcall_MACS2_rendition_1E-8_downsampled_try3_peak_1837	210	11.041	21.0226	18.0755	63
chr1	191403346	191403518	Project004-IPSHOCH-Exp5-ChIP-NPC-CTCF-IP-Blobel-Rep2-S1_S8_peakcall_MACS2_rendition_1E-8_downsampled_try3_peak_1838	241	10.9459	24.1597	21.1477	99
chr1	191452371	191452639	Project004-IPSHOCH-Exp5-ChIP-NPC-CTCF-IP-Blobel-Rep2-S1_S8_peakcall_MACS2_rendition_1E-8_downsampled_try3_peak_1839	713	28.7416	71.3469	67.2442	146
chr1	191485877	191486024	Project004-IPSHOCH-Exp5-ChIP-NPC-CTCF-IP-Blobel-Rep2-S1_S8_peakcall_MACS2_rendition_1E-8_downsampled_try3_peak_1840	270	9.40678	27.0855	24.0124	75
chr1	191499288	191499519	Project004-IPSHOCH-Exp5-ChIP-NPC-CTCF-IP-Blobel-Rep2-S1_S8_peakcall_MACS2_rendition_1E-8_downsampled_try3_peak_1841	538	23.2082	53.8399	50.1672	132
chr1	191524955	191525137	Project004-IPSHOCH-Exp5-ChIP-NPC-CTCF-IP-Blobel-Rep2-S1_S8_peakcall_MACS2_rendition_1E-8_downsampled_try3_peak_1842	348	14.1892	34.8116	31.5773	93
chr1	191706885	191707101	Project004-IPSHOCH-Exp5-ChIP-NPC-CTCF-IP-Blobel-Rep2-S1_S8_peakcall_MACS2_rendition_1E-8_downsampled_try3_peak_1843	390	15.4054	39.0183	35.6872	110
chr1	191707757	191707944	Project004-IPSHOCH-Exp5-ChIP-NPC-CTCF-IP-Blobel-Rep2-S1_S8_peakcall_MACS2_rendition_1E-8_downsampled_try3_peak_1844	263	13.2465	26.3042	23.2451	114
chr1	191711410	191711710	Project004-IPSHOCH-Exp5-ChIP-NPC-CTCF-IP-Blobel-Rep2-S1_S8_peakcall_MACS2_rendition_1E-8_downsampled_try3_peak_1845	827	32.3077	82.7078	78.2943	150
chr1	191751619	191751864	Project004-IPSHOCH-Exp5-ChIP-NPC-CTCF-IP-Blobel-Rep2-S1_S8_peakcall_MACS2_rendition_1E-8_downsampled_try3_peak_1846	525	14.7458	52.516	48.8807	123
chr1	191797025	191797232	Project004-IPSHOCH-Exp5-ChIP-NPC-CTCF-IP-Blobel-Rep2-S1_S8_peakcall_MACS2_rendition_1E-8_downsampled_try3_peak_1847	520	13.2857	52.0795	48.4633	91
chr1	191869744	191870058	Project004-IPSHOCH-Exp5-ChIP-NPC-CTCF-IP-Blobel-Rep2-S1_S8_peakcall_MACS2_rendition_1E-8_downsampled_try3_peak_1848	558	13.9286	55.8063	52.0935	103
chr1	192366000	192366144	Project004-IPSHOCH-Exp5-ChIP-NPC-CTCF-IP-Blobel-Rep2-S1_S8_peakcall_MACS2_rendition_1E-8_downsampled_try3_peak_1849	164	9.38293	16.423	13.5789	51
chr1	192519543	192519746	Project004-IPSHOCH-Exp5-ChIP-NPC-CTCF-IP-Blobel-Rep2-S1_S8_peakcall_MACS2_rendition_1E-8_downsampled_try3_peak_1850	450	20.1923	45.0382	41.5819	99
chr1	192585776	192585917	Project004-IPSHOCH-Exp5-ChIP-NPC-CTCF-IP-Blobel-Rep2-S1_S8_peakcall_MACS2_rendition_1E-8_downsampled_try3_peak_1851	243	12.6923	24.3186	21.2979	71
chr1	192621137	192621430	Project004-IPSHOCH-Exp5-ChIP-NPC-CTCF-IP-Blobel-Rep2-S1_S8_peakcall_MACS2_rendition_1E-8_downsampled_try3_peak_1852	702	26.6038	70.234	66.1536	136
chr1	192655783	192656007	Project004-IPSHOCH-Exp5-ChIP-NPC-CTCF-IP-Blobel-Rep2-S1_S8_peakcall_MACS2_rendition_1E-8_downsampled_try3_peak_1853	339	10.9322	33.9286	30.7076	66
chr1	192692847	192692998	Project004-IPSHOCH-Exp5-ChIP-NPC-CTCF-IP-Blobel-Rep2-S1_S8_peakcall_MACS2_rendition_1E-8_downsampled_try3_peak_1854	175	7.8125	17.5473	14.6752	84
chr1	192705388	192705603	Project004-IPSHOCH-Exp5-ChIP-NPC-CTCF-IP-Blobel-Rep2-S1_S8_peakcall_MACS2_rendition_1E-8_downsampled_try3_peak_1855	518	22.5	51.8733	48.2623	101
chr1	192768318	192768530	Project004-IPSHOCH-Exp5-ChIP-NPC-CTCF-IP-Blobel-Rep2-S1_S8_peakcall_MACS2_rendition_1E-8_downsampled_try3_peak_1856	622	25.3891	62.2509	58.3858	94
chr1	192813689	192813826	Project004-IPSHOCH-Exp5-ChIP-NPC-CTCF-IP-Blobel-Rep2-S1_S8_peakcall_MACS2_rendition_1E-8_downsampled_try3_peak_1857	213	11.5385	21.3832	18.4295	64
chr1	192826266	192826398	Project004-IPSHOCH-Exp5-ChIP-NPC-CTCF-IP-Blobel-Rep2-S1_S8_peakcall_MACS2_rendition_1E-8_downsampled_try3_peak_1858	185	10.3846	18.5323	15.6407	43
chr1	192892366	192892514	Project004-IPSHOCH-Exp5-ChIP-NPC-CTCF-IP-Blobel-Rep2-S1_S8_peakcall_MACS2_rendition_1E-8_downsampled_try3_peak_1859	241	10.9459	24.1597	21.1477	62
chr1	192899516	192899761	Project004-IPSHOCH-Exp5-ChIP-NPC-CTCF-IP-Blobel-Rep2-S1_S8_peakcall_MACS2_rendition_1E-8_downsampled_try3_peak_1860	496	15.9375	49.6638	46.1027	145
chr1	192908937	192909153	Project004-IPSHOCH-Exp5-ChIP-NPC-CTCF-IP-Blobel-Rep2-S1_S8_peakcall_MACS2_rendition_1E-8_downsampled_try3_peak_1861	185	10.3846	18.5323	15.6407	118
chr1	192918956	192919148	Project004-IPSHOCH-Exp5-ChIP-NPC-CTCF-IP-Blobel-Rep2-S1_S8_peakcall_MACS2_rendition_1E-8_downsampled_try3_peak_1862	172	9.86348	17.2368	14.3688	87
chr1	192922361	192922507	Project004-IPSHOCH-Exp5-ChIP-NPC-CTCF-IP-Blobel-Rep2-S1_S8_peakcall_MACS2_rendition_1E-8_downsampled_try3_peak_1863	119	7.54266	11.9126	9.18019	109
chr1	192949956	192950240	Project004-IPSHOCH-Exp5-ChIP-NPC-CTCF-IP-Blobel-Rep2-S1_S8_peakcall_MACS2_rendition_1E-8_downsampled_try3_peak_1864	467	20.7692	46.7295	43.238	78
chr1	192977053	192977265	Project004-IPSHOCH-Exp5-ChIP-NPC-CTCF-IP-Blobel-Rep2-S1_S8_peakcall_MACS2_rendition_1E-8_downsampled_try3_peak_1865	520	22.628	52.0971	48.4764	109
chr1	193006327	193006583	Project004-IPSHOCH-Exp5-ChIP-NPC-CTCF-IP-Blobel-Rep2-S1_S8_peakcall_MACS2_rendition_1E-8_downsampled_try3_peak_1866	280	12.1622	28.0497	24.9519	116
chr1	193026236	193026364	Project004-IPSHOCH-Exp5-ChIP-NPC-CTCF-IP-Blobel-Rep2-S1_S8_peakcall_MACS2_rendition_1E-8_downsampled_try3_peak_1867	171	9.80769	17.1414	14.2785	46
chr1	193099496	193099671	Project004-IPSHOCH-Exp5-ChIP-NPC-CTCF-IP-Blobel-Rep2-S1_S8_peakcall_MACS2_rendition_1E-8_downsampled_try3_peak_1868	362	11.4407	36.2919	33.026	81
chr1	193112742	193112943	Project004-IPSHOCH-Exp5-ChIP-NPC-CTCF-IP-Blobel-Rep2-S1_S8_peakcall_MACS2_rendition_1E-8_downsampled_try3_peak_1869	179	8.91892	17.9999	15.1172	107
chr1	193123498	193123723	Project004-IPSHOCH-Exp5-ChIP-NPC-CTCF-IP-Blobel-Rep2-S1_S8_peakcall_MACS2_rendition_1E-8_downsampled_try3_peak_1870	483	20.8697	48.3244	44.7989	122
chr1	193132075	193132263	Project004-IPSHOCH-Exp5-ChIP-NPC-CTCF-IP-Blobel-Rep2-S1_S8_peakcall_MACS2_rendition_1E-8_downsampled_try3_peak_1871	359	16.0626	35.9467	32.6906	88
chr1	193136364	193136574	Project004-IPSHOCH-Exp5-ChIP-NPC-CTCF-IP-Blobel-Rep2-S1_S8_peakcall_MACS2_rendition_1E-8_downsampled_try3_peak_1872	566	21.6331	56.6611	52.9359	91
chr1	193176782	193177006	Project004-IPSHOCH-Exp5-ChIP-NPC-CTCF-IP-Blobel-Rep2-S1_S8_peakcall_MACS2_rendition_1E-8_downsampled_try3_peak_1873	175	7.8125	17.5473	14.6752	120
chr1	193215261	193215462	Project004-IPSHOCH-Exp5-ChIP-NPC-CTCF-IP-Blobel-Rep2-S1_S8_peakcall_MACS2_rendition_1E-8_downsampled_try3_peak_1874	386	17.662	38.6596	35.3447	106
chr1	193386797	193387015	Project004-IPSHOCH-Exp5-ChIP-NPC-CTCF-IP-Blobel-Rep2-S1_S8_peakcall_MACS2_rendition_1E-8_downsampled_try3_peak_1875	390	15.4054	39.0183	35.6872	110
chr1	193399593	193400153	Project004-IPSHOCH-Exp5-ChIP-NPC-CTCF-IP-Blobel-Rep2-S1_S8_peakcall_MACS2_rendition_1E-8_downsampled_try3_peak_1876	770	19.322	77.013	72.7608	294
chr1	193641781	193642045	Project004-IPSHOCH-Exp5-ChIP-NPC-CTCF-IP-Blobel-Rep2-S1_S8_peakcall_MACS2_rendition_1E-8_downsampled_try3_peak_1877	891	31.214	89.144	84.5622	122
chr1	193653092	193653234	Project004-IPSHOCH-Exp5-ChIP-NPC-CTCF-IP-Blobel-Rep2-S1_S8_peakcall_MACS2_rendition_1E-8_downsampled_try3_peak_1878	158	9.28328	15.8647	13.0259	43
chr1	193658765	193658983	Project004-IPSHOCH-Exp5-ChIP-NPC-CTCF-IP-Blobel-Rep2-S1_S8_peakcall_MACS2_rendition_1E-8_downsampled_try3_peak_1879	630	21.8919	63.0066	59.1167	100
chr1	193731419	193731634	Project004-IPSHOCH-Exp5-ChIP-NPC-CTCF-IP-Blobel-Rep2-S1_S8_peakcall_MACS2_rendition_1E-8_downsampled_try3_peak_1880	538	18.1883	53.8907	50.2179	88
chr1	193788180	193788369	Project004-IPSHOCH-Exp5-ChIP-NPC-CTCF-IP-Blobel-Rep2-S1_S8_peakcall_MACS2_rendition_1E-8_downsampled_try3_peak_1881	465	17.5999	46.5424	43.0562	116
chr1	193789043	193789258	Project004-IPSHOCH-Exp5-ChIP-NPC-CTCF-IP-Blobel-Rep2-S1_S8_peakcall_MACS2_rendition_1E-8_downsampled_try3_peak_1882	608	18.4375	60.8783	57.0443	114
chr1	193819451	193819659	Project004-IPSHOCH-Exp5-ChIP-NPC-CTCF-IP-Blobel-Rep2-S1_S8_peakcall_MACS2_rendition_1E-8_downsampled_try3_peak_1883	640	25.9411	64.0137	60.1027	107
chr1	193916856	193917144	Project004-IPSHOCH-Exp5-ChIP-NPC-CTCF-IP-Blobel-Rep2-S1_S8_peakcall_MACS2_rendition_1E-8_downsampled_try3_peak_1884	627	26.1092	62.7096	58.8287	149
chr1	193918412	193918611	Project004-IPSHOCH-Exp5-ChIP-NPC-CTCF-IP-Blobel-Rep2-S1_S8_peakcall_MACS2_rendition_1E-8_downsampled_try3_peak_1885	326	11.875	32.6367	29.4451	102
chr1	193931297	193931545	Project004-IPSHOCH-Exp5-ChIP-NPC-CTCF-IP-Blobel-Rep2-S1_S8_peakcall_MACS2_rendition_1E-8_downsampled_try3_peak_1886	402	13.75	40.2917	36.9391	122
chr1	193961957	193962093	Project004-IPSHOCH-Exp5-ChIP-NPC-CTCF-IP-Blobel-Rep2-S1_S8_peakcall_MACS2_rendition_1E-8_downsampled_try3_peak_1887	228	10.5405	22.8938	19.9053	70
chr1	194013013	194013208	Project004-IPSHOCH-Exp5-ChIP-NPC-CTCF-IP-Blobel-Rep2-S1_S8_peakcall_MACS2_rendition_1E-8_downsampled_try3_peak_1888	242	9.6875	24.2245	21.2098	96
chr1	194014427	194014734	Project004-IPSHOCH-Exp5-ChIP-NPC-CTCF-IP-Blobel-Rep2-S1_S8_peakcall_MACS2_rendition_1E-8_downsampled_try3_peak_1889	755	21.5625	75.5477	71.3238	172
chr1	194267979	194268102	Project004-IPSHOCH-Exp5-ChIP-NPC-CTCF-IP-Blobel-Rep2-S1_S8_peakcall_MACS2_rendition_1E-8_downsampled_try3_peak_1890	158	9.28328	15.8647	13.0259	85
chr1	194422393	194422595	Project004-IPSHOCH-Exp5-ChIP-NPC-CTCF-IP-Blobel-Rep2-S1_S8_peakcall_MACS2_rendition_1E-8_downsampled_try3_peak_1891	469	15.3125	46.9413	43.4356	71
chr1	194538230	194538448	Project004-IPSHOCH-Exp5-ChIP-NPC-CTCF-IP-Blobel-Rep2-S1_S8_peakcall_MACS2_rendition_1E-8_downsampled_try3_peak_1892	418	16.2162	41.8796	38.4905	106
chr1	194548462	194548631	Project004-IPSHOCH-Exp5-ChIP-NPC-CTCF-IP-Blobel-Rep2-S1_S8_peakcall_MACS2_rendition_1E-8_downsampled_try3_peak_1893	341	15.7729	34.1464	30.9231	109
chr1	194553231	194553519	Project004-IPSHOCH-Exp5-ChIP-NPC-CTCF-IP-Blobel-Rep2-S1_S8_peakcall_MACS2_rendition_1E-8_downsampled_try3_peak_1894	688	26.8139	68.8592	64.821	120
chr1	194571388	194571594	Project004-IPSHOCH-Exp5-ChIP-NPC-CTCF-IP-Blobel-Rep2-S1_S8_peakcall_MACS2_rendition_1E-8_downsampled_try3_peak_1895	338	12.1875	33.886	30.6682	102
chr1	194610638	194610858	Project004-IPSHOCH-Exp5-ChIP-NPC-CTCF-IP-Blobel-Rep2-S1_S8_peakcall_MACS2_rendition_1E-8_downsampled_try3_peak_1896	789	31.1538	78.9497	74.6396	104
chr1	194738396	194738765	Project004-IPSHOCH-Exp5-ChIP-NPC-CTCF-IP-Blobel-Rep2-S1_S8_peakcall_MACS2_rendition_1E-8_downsampled_try3_peak_1897	353	16.8259	35.3259	32.0766	113
chr1	194827162	194827364	Project004-IPSHOCH-Exp5-ChIP-NPC-CTCF-IP-Blobel-Rep2-S1_S8_peakcall_MACS2_rendition_1E-8_downsampled_try3_peak_1898	376	15	37.6044	34.309	94
chr1	194952190	194952334	Project004-IPSHOCH-Exp5-ChIP-NPC-CTCF-IP-Blobel-Rep2-S1_S8_peakcall_MACS2_rendition_1E-8_downsampled_try3_peak_1899	217	11.4764	21.7532	18.7872	66
chr1	194956376	194956649	Project004-IPSHOCH-Exp5-ChIP-NPC-CTCF-IP-Blobel-Rep2-S1_S8_peakcall_MACS2_rendition_1E-8_downsampled_try3_peak_1900	818	23.4177	81.8562	77.4689	171
chr1	195034472	195034656	Project004-IPSHOCH-Exp5-ChIP-NPC-CTCF-IP-Blobel-Rep2-S1_S8_peakcall_MACS2_rendition_1E-8_downsampled_try3_peak_1901	351	16.7308	35.1605	31.9158	80
chr1	195081754	195081968	Project004-IPSHOCH-Exp5-ChIP-NPC-CTCF-IP-Blobel-Rep2-S1_S8_peakcall_MACS2_rendition_1E-8_downsampled_try3_peak_1902	418	19.1468	41.8815	38.4905	99
chr1	195150489	195150754	Project004-IPSHOCH-Exp5-ChIP-NPC-CTCF-IP-Blobel-Rep2-S1_S8_peakcall_MACS2_rendition_1E-8_downsampled_try3_peak_1903	376	13.125	37.6986	34.3994	139
chr1	195152941	195153064	Project004-IPSHOCH-Exp5-ChIP-NPC-CTCF-IP-Blobel-Rep2-S1_S8_peakcall_MACS2_rendition_1E-8_downsampled_try3_peak_1904	161	9.19973	16.1167	13.2774	79
chr1	195156402	195156709	Project004-IPSHOCH-Exp5-ChIP-NPC-CTCF-IP-Blobel-Rep2-S1_S8_peakcall_MACS2_rendition_1E-8_downsampled_try3_peak_1905	1015	31.516	101.512	96.6378	143
chr1	195190089	195190285	Project004-IPSHOCH-Exp5-ChIP-NPC-CTCF-IP-Blobel-Rep2-S1_S8_peakcall_MACS2_rendition_1E-8_downsampled_try3_peak_1906	451	18.9884	45.1219	41.6651	94
chr1	195203046	195203261	Project004-IPSHOCH-Exp5-ChIP-NPC-CTCF-IP-Blobel-Rep2-S1_S8_peakcall_MACS2_rendition_1E-8_downsampled_try3_peak_1907	861	27.8324	86.1778	81.677	97
chr1	195209119	195209500	Project004-IPSHOCH-Exp5-ChIP-NPC-CTCF-IP-Blobel-Rep2-S1_S8_peakcall_MACS2_rendition_1E-8_downsampled_try3_peak_1908	474	11.4815	47.4833	43.9715	116
chr1	195212397	195212602	Project004-IPSHOCH-Exp5-ChIP-NPC-CTCF-IP-Blobel-Rep2-S1_S8_peakcall_MACS2_rendition_1E-8_downsampled_try3_peak_1909	658	17.2881	65.8689	61.9139	108
chr1	195275738	195276022	Project004-IPSHOCH-Exp5-ChIP-NPC-CTCF-IP-Blobel-Rep2-S1_S8_peakcall_MACS2_rendition_1E-8_downsampled_try3_peak_1910	390	15.4054	39.0183	35.6872	166
chr1	195330190	195330393	Project004-IPSHOCH-Exp5-ChIP-NPC-CTCF-IP-Blobel-Rep2-S1_S8_peakcall_MACS2_rendition_1E-8_downsampled_try3_peak_1911	451	19.8697	45.1733	41.7145	101
chr1	195402220	195402473	Project004-IPSHOCH-Exp5-ChIP-NPC-CTCF-IP-Blobel-Rep2-S1_S8_peakcall_MACS2_rendition_1E-8_downsampled_try3_peak_1912	598	21.0811	59.8822	56.0741	112
chr1	195415333	195415546	Project004-IPSHOCH-Exp5-ChIP-NPC-CTCF-IP-Blobel-Rep2-S1_S8_peakcall_MACS2_rendition_1E-8_downsampled_try3_peak_1913	399	12.2034	39.9077	36.571	97
chr1	195425472	195425661	Project004-IPSHOCH-Exp5-ChIP-NPC-CTCF-IP-Blobel-Rep2-S1_S8_peakcall_MACS2_rendition_1E-8_downsampled_try3_peak_1914	351	16.7308	35.1605	31.9158	94
chr1	195499474	195499696	Project004-IPSHOCH-Exp5-ChIP-NPC-CTCF-IP-Blobel-Rep2-S1_S8_peakcall_MACS2_rendition_1E-8_downsampled_try3_peak_1915	450	20.1923	45.0382	41.5819	122
chr1	195525040	195525388	Project004-IPSHOCH-Exp5-ChIP-NPC-CTCF-IP-Blobel-Rep2-S1_S8_peakcall_MACS2_rendition_1E-8_downsampled_try3_peak_1916	958	30	95.8394	91.0954	233
chr1	195529363	195529586	Project004-IPSHOCH-Exp5-ChIP-NPC-CTCF-IP-Blobel-Rep2-S1_S8_peakcall_MACS2_rendition_1E-8_downsampled_try3_peak_1917	633	24.5959	63.373	59.4747	103
chr1	196049259	196049516	Project004-IPSHOCH-Exp5-ChIP-NPC-CTCF-IP-Blobel-Rep2-S1_S8_peakcall_MACS2_rendition_1E-8_downsampled_try3_peak_1918	564	15.5085	56.4493	52.7335	117
chr1	196434163	196434369	Project004-IPSHOCH-Exp5-ChIP-NPC-CTCF-IP-Blobel-Rep2-S1_S8_peakcall_MACS2_rendition_1E-8_downsampled_try3_peak_1919	254	11.3514	25.4413	22.3988	80
chr1	196445022	196445197	Project004-IPSHOCH-Exp5-ChIP-NPC-CTCF-IP-Blobel-Rep2-S1_S8_peakcall_MACS2_rendition_1E-8_downsampled_try3_peak_1920	228	10.5405	22.8938	19.9053	83
chr1	196445961	196446110	Project004-IPSHOCH-Exp5-ChIP-NPC-CTCF-IP-Blobel-Rep2-S1_S8_peakcall_MACS2_rendition_1E-8_downsampled_try3_peak_1921	168	8.51351	16.8225	13.9686	81
chr1	196450723	196450915	Project004-IPSHOCH-Exp5-ChIP-NPC-CTCF-IP-Blobel-Rep2-S1_S8_peakcall_MACS2_rendition_1E-8_downsampled_try3_peak_1922	289	10.9375	28.9576	25.8462	88
chr1	196587662	196587919	Project004-IPSHOCH-Exp5-ChIP-NPC-CTCF-IP-Blobel-Rep2-S1_S8_peakcall_MACS2_rendition_1E-8_downsampled_try3_peak_1923	290	14.5051	29.0062	25.8892	156
chr1	196643118	196643400	Project004-IPSHOCH-Exp5-ChIP-NPC-CTCF-IP-Blobel-Rep2-S1_S8_peakcall_MACS2_rendition_1E-8_downsampled_try3_peak_1924	958	30	95.8394	91.0954	162
chr1	196665542	196665748	Project004-IPSHOCH-Exp5-ChIP-NPC-CTCF-IP-Blobel-Rep2-S1_S8_peakcall_MACS2_rendition_1E-8_downsampled_try3_peak_1925	239	11.5069	23.9511	20.9451	73
chr1	196705783	196706070	Project004-IPSHOCH-Exp5-ChIP-NPC-CTCF-IP-Blobel-Rep2-S1_S8_peakcall_MACS2_rendition_1E-8_downsampled_try3_peak_1926	770	21.875	77.0506	72.7953	111
chr1	196777262	196777449	Project004-IPSHOCH-Exp5-ChIP-NPC-CTCF-IP-Blobel-Rep2-S1_S8_peakcall_MACS2_rendition_1E-8_downsampled_try3_peak_1927	191	10.4868	19.1402	16.2346	97
chr1	196779252	196779389	Project004-IPSHOCH-Exp5-ChIP-NPC-CTCF-IP-Blobel-Rep2-S1_S8_peakcall_MACS2_rendition_1E-8_downsampled_try3_peak_1928	191	10.4868	19.1402	16.2346	75
chr1	196788416	196788687	Project004-IPSHOCH-Exp5-ChIP-NPC-CTCF-IP-Blobel-Rep2-S1_S8_peakcall_MACS2_rendition_1E-8_downsampled_try3_peak_1929	567	20.2703	56.7908	53.0543	149
chr1	196802394	196802619	Project004-IPSHOCH-Exp5-ChIP-NPC-CTCF-IP-Blobel-Rep2-S1_S8_peakcall_MACS2_rendition_1E-8_downsampled_try3_peak_1930	424	11.5714	42.4552	39.0551	106
chr1	196802777	196802906	Project004-IPSHOCH-Exp5-ChIP-NPC-CTCF-IP-Blobel-Rep2-S1_S8_peakcall_MACS2_rendition_1E-8_downsampled_try3_peak_1931	187	8.21537	18.7887	15.8871	30
chr1	196866708	196866992	Project004-IPSHOCH-Exp5-ChIP-NPC-CTCF-IP-Blobel-Rep2-S1_S8_peakcall_MACS2_rendition_1E-8_downsampled_try3_peak_1932	773	30.7508	77.3881	73.1165	118
chr1	196957134	196957349	Project004-IPSHOCH-Exp5-ChIP-NPC-CTCF-IP-Blobel-Rep2-S1_S8_peakcall_MACS2_rendition_1E-8_downsampled_try3_peak_1933	682	25.4514	68.2697	64.2401	103
chr1	197058904	197059101	Project004-IPSHOCH-Exp5-ChIP-NPC-CTCF-IP-Blobel-Rep2-S1_S8_peakcall_MACS2_rendition_1E-8_downsampled_try3_peak_1934	311	9.42857	31.1522	27.9931	105
chr1	197067666	197067972	Project004-IPSHOCH-Exp5-ChIP-NPC-CTCF-IP-Blobel-Rep2-S1_S8_peakcall_MACS2_rendition_1E-8_downsampled_try3_peak_1935	561	16.4511	56.1119	52.3982	109
chr10	3012851	3013190	Project004-IPSHOCH-Exp5-ChIP-NPC-CTCF-IP-Blobel-Rep2-S1_S8_peakcall_MACS2_rendition_1E-8_downsampled_try3_peak_1936	770	30.5769	77.0825	72.8198	161
chr10	3134926	3135070	Project004-IPSHOCH-Exp5-ChIP-NPC-CTCF-IP-Blobel-Rep2-S1_S8_peakcall_MACS2_rendition_1E-8_downsampled_try3_peak_1937	250	11.4747	25.0581	22.0265	49
chr10	3270046	3270282	Project004-IPSHOCH-Exp5-ChIP-NPC-CTCF-IP-Blobel-Rep2-S1_S8_peakcall_MACS2_rendition_1E-8_downsampled_try3_peak_1938	696	28.2692	69.6964	65.6335	118
chr10	3460829	3461013	Project004-IPSHOCH-Exp5-ChIP-NPC-CTCF-IP-Blobel-Rep2-S1_S8_peakcall_MACS2_rendition_1E-8_downsampled_try3_peak_1939	351	16.7308	35.1605	31.9158	59
chr10	3651775	3651981	Project004-IPSHOCH-Exp5-ChIP-NPC-CTCF-IP-Blobel-Rep2-S1_S8_peakcall_MACS2_rendition_1E-8_downsampled_try3_peak_1940	369	17.4061	36.944	33.6632	95
chr10	4310413	4310634	Project004-IPSHOCH-Exp5-ChIP-NPC-CTCF-IP-Blobel-Rep2-S1_S8_peakcall_MACS2_rendition_1E-8_downsampled_try3_peak_1941	696	28.2692	69.6964	65.6335	106
chr10	4486517	4486640	Project004-IPSHOCH-Exp5-ChIP-NPC-CTCF-IP-Blobel-Rep2-S1_S8_peakcall_MACS2_rendition_1E-8_downsampled_try3_peak_1942	145	8.70307	14.5188	11.7163	67
chr10	4499267	4499450	Project004-IPSHOCH-Exp5-ChIP-NPC-CTCF-IP-Blobel-Rep2-S1_S8_peakcall_MACS2_rendition_1E-8_downsampled_try3_peak_1943	186	10.4437	18.6335	15.7332	86
chr10	4504893	4505063	Project004-IPSHOCH-Exp5-ChIP-NPC-CTCF-IP-Blobel-Rep2-S1_S8_peakcall_MACS2_rendition_1E-8_downsampled_try3_peak_1944	177	9.93487	17.7699	14.8931	101
chr10	4521388	4521583	Project004-IPSHOCH-Exp5-ChIP-NPC-CTCF-IP-Blobel-Rep2-S1_S8_peakcall_MACS2_rendition_1E-8_downsampled_try3_peak_1945	351	12.5	35.1463	31.9064	96
chr10	4545768	4545950	Project004-IPSHOCH-Exp5-ChIP-NPC-CTCF-IP-Blobel-Rep2-S1_S8_peakcall_MACS2_rendition_1E-8_downsampled_try3_peak_1946	380	17.3171	38.0704	34.7687	81
chr10	4555579	4555799	Project004-IPSHOCH-Exp5-ChIP-NPC-CTCF-IP-Blobel-Rep2-S1_S8_peakcall_MACS2_rendition_1E-8_downsampled_try3_peak_1947	553	23.6538	55.3579	51.6521	108
chr10	4559310	4559526	Project004-IPSHOCH-Exp5-ChIP-NPC-CTCF-IP-Blobel-Rep2-S1_S8_peakcall_MACS2_rendition_1E-8_downsampled_try3_peak_1948	571	24.2308	57.116	53.3693	109
chr10	4711921	4712078	Project004-IPSHOCH-Exp5-ChIP-NPC-CTCF-IP-Blobel-Rep2-S1_S8_peakcall_MACS2_rendition_1E-8_downsampled_try3_peak_1949	266	12.4275	26.6606	23.5974	68
chr10	4746131	4746334	Project004-IPSHOCH-Exp5-ChIP-NPC-CTCF-IP-Blobel-Rep2-S1_S8_peakcall_MACS2_rendition_1E-8_downsampled_try3_peak_1950	304	15	30.4143	27.2723	86
chr10	4791321	4791503	Project004-IPSHOCH-Exp5-ChIP-NPC-CTCF-IP-Blobel-Rep2-S1_S8_peakcall_MACS2_rendition_1E-8_downsampled_try3_peak_1951	355	15.0256	35.5573	32.3049	82
chr10	4834027	4834152	Project004-IPSHOCH-Exp5-ChIP-NPC-CTCF-IP-Blobel-Rep2-S1_S8_peakcall_MACS2_rendition_1E-8_downsampled_try3_peak_1952	183	9.98948	18.3079	15.4213	55
chr10	4856225	4856356	Project004-IPSHOCH-Exp5-ChIP-NPC-CTCF-IP-Blobel-Rep2-S1_S8_peakcall_MACS2_rendition_1E-8_downsampled_try3_peak_1953	168	8.51351	16.8225	13.9686	52
chr10	4866153	4866386	Project004-IPSHOCH-Exp5-ChIP-NPC-CTCF-IP-Blobel-Rep2-S1_S8_peakcall_MACS2_rendition_1E-8_downsampled_try3_peak_1954	591	24.9488	59.1316	55.3381	136
chr10	5009869	5010018	Project004-IPSHOCH-Exp5-ChIP-NPC-CTCF-IP-Blobel-Rep2-S1_S8_peakcall_MACS2_rendition_1E-8_downsampled_try3_peak_1955	301	14.8685	30.1872	27.0508	84
chr10	5028608	5028885	Project004-IPSHOCH-Exp5-ChIP-NPC-CTCF-IP-Blobel-Rep2-S1_S8_peakcall_MACS2_rendition_1E-8_downsampled_try3_peak_1956	678	27.6923	67.8714	63.8571	113
chr10	5118891	5119033	Project004-IPSHOCH-Exp5-ChIP-NPC-CTCF-IP-Blobel-Rep2-S1_S8_peakcall_MACS2_rendition_1E-8_downsampled_try3_peak_1957	200	11.0239	20.0537	17.1237	74
chr10	5175854	5175977	Project004-IPSHOCH-Exp5-ChIP-NPC-CTCF-IP-Blobel-Rep2-S1_S8_peakcall_MACS2_rendition_1E-8_downsampled_try3_peak_1958	131	8.07692	13.123	10.3635	87
chr10	5184622	5184868	Project004-IPSHOCH-Exp5-ChIP-NPC-CTCF-IP-Blobel-Rep2-S1_S8_peakcall_MACS2_rendition_1E-8_downsampled_try3_peak_1959	467	20.7692	46.7295	43.238	138
chr10	5621399	5621552	Project004-IPSHOCH-Exp5-ChIP-NPC-CTCF-IP-Blobel-Rep2-S1_S8_peakcall_MACS2_rendition_1E-8_downsampled_try3_peak_1960	186	10.4437	18.6335	15.7332	101
chr10	5671295	5671471	Project004-IPSHOCH-Exp5-ChIP-NPC-CTCF-IP-Blobel-Rep2-S1_S8_peakcall_MACS2_rendition_1E-8_downsampled_try3_peak_1961	248	8.8983	24.8937	21.8632	91
chr10	5748026	5748197	Project004-IPSHOCH-Exp5-ChIP-NPC-CTCF-IP-Blobel-Rep2-S1_S8_peakcall_MACS2_rendition_1E-8_downsampled_try3_peak_1962	387	17.3502	38.7969	35.4789	78
chr10	5941431	5941573	Project004-IPSHOCH-Exp5-ChIP-NPC-CTCF-IP-Blobel-Rep2-S1_S8_peakcall_MACS2_rendition_1E-8_downsampled_try3_peak_1963	154	7.1875	15.4506	12.6326	49
chr10	5954438	5954580	Project004-IPSHOCH-Exp5-ChIP-NPC-CTCF-IP-Blobel-Rep2-S1_S8_peakcall_MACS2_rendition_1E-8_downsampled_try3_peak_1964	254	11.3514	25.4413	22.3988	72
chr10	5974308	5974486	Project004-IPSHOCH-Exp5-ChIP-NPC-CTCF-IP-Blobel-Rep2-S1_S8_peakcall_MACS2_rendition_1E-8_downsampled_try3_peak_1965	543	22.6183	54.328	50.6542	85
chr10	5999446	5999668	Project004-IPSHOCH-Exp5-ChIP-NPC-CTCF-IP-Blobel-Rep2-S1_S8_peakcall_MACS2_rendition_1E-8_downsampled_try3_peak_1966	369	17.4061	36.944	33.6632	106
chr10	6012859	6013043	Project004-IPSHOCH-Exp5-ChIP-NPC-CTCF-IP-Blobel-Rep2-S1_S8_peakcall_MACS2_rendition_1E-8_downsampled_try3_peak_1967	450	17.1906	45.0679	41.6112	91
chr10	6257527	6257706	Project004-IPSHOCH-Exp5-ChIP-NPC-CTCF-IP-Blobel-Rep2-S1_S8_peakcall_MACS2_rendition_1E-8_downsampled_try3_peak_1968	273	13.8461	27.331	24.2518	94
chr10	6304608	6304810	Project004-IPSHOCH-Exp5-ChIP-NPC-CTCF-IP-Blobel-Rep2-S1_S8_peakcall_MACS2_rendition_1E-8_downsampled_try3_peak_1969	156	8.10811	15.6651	12.8402	91
chr10	6309202	6309337	Project004-IPSHOCH-Exp5-ChIP-NPC-CTCF-IP-Blobel-Rep2-S1_S8_peakcall_MACS2_rendition_1E-8_downsampled_try3_peak_1970	145	7.7027	14.5288	11.7208	72
chr10	6349794	6349974	Project004-IPSHOCH-Exp5-ChIP-NPC-CTCF-IP-Blobel-Rep2-S1_S8_peakcall_MACS2_rendition_1E-8_downsampled_try3_peak_1971	307	12.973	30.7148	27.5609	104
chr10	6350990	6351212	Project004-IPSHOCH-Exp5-ChIP-NPC-CTCF-IP-Blobel-Rep2-S1_S8_peakcall_MACS2_rendition_1E-8_downsampled_try3_peak_1972	168	8.51351	16.8225	13.9686	114
chr10	6373260	6373583	Project004-IPSHOCH-Exp5-ChIP-NPC-CTCF-IP-Blobel-Rep2-S1_S8_peakcall_MACS2_rendition_1E-8_downsampled_try3_peak_1973	566	17.5	56.6146	52.8939	207
chr10	6402337	6402541	Project004-IPSHOCH-Exp5-ChIP-NPC-CTCF-IP-Blobel-Rep2-S1_S8_peakcall_MACS2_rendition_1E-8_downsampled_try3_peak_1974	485	19.6888	48.5733	45.035	92
chr10	6605117	6605240	Project004-IPSHOCH-Exp5-ChIP-NPC-CTCF-IP-Blobel-Rep2-S1_S8_peakcall_MACS2_rendition_1E-8_downsampled_try3_peak_1975	156	8.10811	15.6651	12.8402	49
chr10	6772364	6772504	Project004-IPSHOCH-Exp5-ChIP-NPC-CTCF-IP-Blobel-Rep2-S1_S8_peakcall_MACS2_rendition_1E-8_downsampled_try3_peak_1976	201	10.5411	20.1907	17.2592	59
chr10	6773274	6773509	Project004-IPSHOCH-Exp5-ChIP-NPC-CTCF-IP-Blobel-Rep2-S1_S8_peakcall_MACS2_rendition_1E-8_downsampled_try3_peak_1977	685	26.1018	68.5062	64.4735	119
chr10	6811939	6812070	Project004-IPSHOCH-Exp5-ChIP-NPC-CTCF-IP-Blobel-Rep2-S1_S8_peakcall_MACS2_rendition_1E-8_downsampled_try3_peak_1978	123	6.89189	12.3237	9.58027	86
chr10	6814804	6815046	Project004-IPSHOCH-Exp5-ChIP-NPC-CTCF-IP-Blobel-Rep2-S1_S8_peakcall_MACS2_rendition_1E-8_downsampled_try3_peak_1979	510	16.25	51.0377	47.4406	103
chr10	6939983	6940129	Project004-IPSHOCH-Exp5-ChIP-NPC-CTCF-IP-Blobel-Rep2-S1_S8_peakcall_MACS2_rendition_1E-8_downsampled_try3_peak_1980	132	8.12287	13.2009	10.4334	69
chr10	7013368	7013608	Project004-IPSHOCH-Exp5-ChIP-NPC-CTCF-IP-Blobel-Rep2-S1_S8_peakcall_MACS2_rendition_1E-8_downsampled_try3_peak_1981	551	15.2542	55.131	51.4465	122
chr10	7020758	7020987	Project004-IPSHOCH-Exp5-ChIP-NPC-CTCF-IP-Blobel-Rep2-S1_S8_peakcall_MACS2_rendition_1E-8_downsampled_try3_peak_1982	609	25.529	60.9157	57.0767	101
chr10	7238362	7238499	Project004-IPSHOCH-Exp5-ChIP-NPC-CTCF-IP-Blobel-Rep2-S1_S8_peakcall_MACS2_rendition_1E-8_downsampled_try3_peak_1983	244	12.7645	24.4431	21.4178	54
chr10	7297886	7298102	Project004-IPSHOCH-Exp5-ChIP-NPC-CTCF-IP-Blobel-Rep2-S1_S8_peakcall_MACS2_rendition_1E-8_downsampled_try3_peak_1984	320	13.3784	32.0676	28.8888	108
chr10	7320576	7320790	Project004-IPSHOCH-Exp5-ChIP-NPC-CTCF-IP-Blobel-Rep2-S1_S8_peakcall_MACS2_rendition_1E-8_downsampled_try3_peak_1985	661	22.7027	66.1629	62.1917	100
chr10	7393578	7393729	Project004-IPSHOCH-Exp5-ChIP-NPC-CTCF-IP-Blobel-Rep2-S1_S8_peakcall_MACS2_rendition_1E-8_downsampled_try3_peak_1986	133	5.18518	13.3073	10.5387	84
chr10	7529890	7530078	Project004-IPSHOCH-Exp5-ChIP-NPC-CTCF-IP-Blobel-Rep2-S1_S8_peakcall_MACS2_rendition_1E-8_downsampled_try3_peak_1987	456	18.4111	45.6423	42.1688	79
chr10	7590822	7590962	Project004-IPSHOCH-Exp5-ChIP-NPC-CTCF-IP-Blobel-Rep2-S1_S8_peakcall_MACS2_rendition_1E-8_downsampled_try3_peak_1988	185	10.3846	18.5323	15.6407	58
chr10	7603421	7603694	Project004-IPSHOCH-Exp5-ChIP-NPC-CTCF-IP-Blobel-Rep2-S1_S8_peakcall_MACS2_rendition_1E-8_downsampled_try3_peak_1989	402	13.75	40.2917	36.9391	76
chr10	7897599	7897737	Project004-IPSHOCH-Exp5-ChIP-NPC-CTCF-IP-Blobel-Rep2-S1_S8_peakcall_MACS2_rendition_1E-8_downsampled_try3_peak_1990	156	8.10811	15.6651	12.8402	54
chr10	7916208	7916394	Project004-IPSHOCH-Exp5-ChIP-NPC-CTCF-IP-Blobel-Rep2-S1_S8_peakcall_MACS2_rendition_1E-8_downsampled_try3_peak_1991	441	17.9508	44.1091	40.6737	107
chr10	7960073	7960395	Project004-IPSHOCH-Exp5-ChIP-NPC-CTCF-IP-Blobel-Rep2-S1_S8_peakcall_MACS2_rendition_1E-8_downsampled_try3_peak_1992	580	17.8125	58.0283	54.2689	202
chr10	7962251	7962464	Project004-IPSHOCH-Exp5-ChIP-NPC-CTCF-IP-Blobel-Rep2-S1_S8_peakcall_MACS2_rendition_1E-8_downsampled_try3_peak_1993	400	18.4615	40.0393	36.6973	101
chr10	8043009	8043379	Project004-IPSHOCH-Exp5-ChIP-NPC-CTCF-IP-Blobel-Rep2-S1_S8_peakcall_MACS2_rendition_1E-8_downsampled_try3_peak_1994	1102	40.6143	110.226	105.161	192
chr10	8111117	8111319	Project004-IPSHOCH-Exp5-ChIP-NPC-CTCF-IP-Blobel-Rep2-S1_S8_peakcall_MACS2_rendition_1E-8_downsampled_try3_peak_1995	351	16.7308	35.1605	31.9158	82
chr10	8238859	8239036	Project004-IPSHOCH-Exp5-ChIP-NPC-CTCF-IP-Blobel-Rep2-S1_S8_peakcall_MACS2_rendition_1E-8_downsampled_try3_peak_1996	191	9.32432	19.1965	16.2856	117
chr10	8402794	8403113	Project004-IPSHOCH-Exp5-ChIP-NPC-CTCF-IP-Blobel-Rep2-S1_S8_peakcall_MACS2_rendition_1E-8_downsampled_try3_peak_1997	945	35.9727	94.5208	89.7986	154
[truncated: 26,863 more rows]
