# Supplementary material for: YY1 and CTCF orchestrate a 3D chromatin looping switch during early neural lineage commitment
Source: HighWire-hosted journal article supplement (doi:10.1101/gr.215160.116), 2017-05-23
Supplement: Supplemental_Table_S8.xlsx [file Supplemental_Table_S8.xlsx]

## Sheet: 2ionly_E-8_E-8_Galaxy488-(Subtr
Beagan et al. 2017
Table S8, Significant CTCF Peaks present only in the 2i condition (classified as '2i only')
#chr	start	end
chr1	4163475	4163685
chr1	4845792	4845982
chr1	4856095	4856457
chr1	4961288	4961531
chr1	5196892	5197195
chr1	7093838	7094052
chr1	7253245	7253424
chr1	9439184	9439368
chr1	9727930	9728141
chr1	9836006	9836219
chr1	9855546	9855742
chr1	10323001	10323188
chr1	11341204	11341367
chr1	12903436	12903669
chr1	13253123	13253349
chr1	15709552	15709867
chr1	15809190	15809392
chr1	16055775	16055940
chr1	16058187	16058427
chr1	16080957	16081165
chr1	17626136	17626354
chr1	18274424	18274625
chr1	20279961	20280127
chr1	20899582	20899858
chr1	21238034	21238241
chr1	21344663	21344880
chr1	21973241	21973434
chr1	22504871	22505087
chr1	23121788	23121952
chr1	24246107	24246342
chr1	25561255	25561446
chr1	26881092	26881300
chr1	27364356	27364543
chr1	28472063	28472275
chr1	31000547	31000736
chr1	33260455	33260629
chr1	33580940	33581199
chr1	33667776	33667944
chr1	33697562	33697817
chr1	33784344	33784496
chr1	33940759	33940949
chr1	34106563	34106782
chr1	34121387	34121580
chr1	34347759	34347929
chr1	34528944	34529107
chr1	34575193	34575381
chr1	34855325	34855564
chr1	34869602	34869757
chr1	34968947	34969154
chr1	35018542	35018694
chr1	35112805	35113004
chr1	36037616	36037769
chr1	36326008	36326196
chr1	36528554	36528725
chr1	36792965	36793118
chr1	36815475	36815688
chr1	36842296	36842454
chr1	36843808	36843978
chr1	37091411	37091614
chr1	37097503	37097703
chr1	37293102	37293440
chr1	37329955	37330169
chr1	37692657	37692841
chr1	37961564	37961770
chr1	38022447	38022690
chr1	38025171	38025340
chr1	38089938	38090100
chr1	38109064	38109216
chr1	39150929	39151107
chr1	39190550	39190751
chr1	39253567	39253745
chr1	39267860	39268062
chr1	39489053	39489281
chr1	39597502	39597658
chr1	39721225	39721413
chr1	39815433	39815628
chr1	40012296	40012455
chr1	40040135	40040295
chr1	40594523	40594697
chr1	43618453	43618761
chr1	43733411	43733611
chr1	43949909	43950158
chr1	44205711	44205895
chr1	44221738	44221931
chr1	46479238	46479417
chr1	46836426	46836608
chr1	49519684	49519836
chr1	50086674	50086883
chr1	51345912	51346064
chr1	51414495	51414647
chr1	52060345	52060682
chr1	52385520	52385682
chr1	52683279	52683578
chr1	54534821	54535104
chr1	54990132	54990313
chr1	55090274	55090488
chr1	55125344	55125704
chr1	55144776	55144930
chr1	55172259	55172451
chr1	55260733	55260928
chr1	55269687	55269917
chr1	55270216	55270428
chr1	55641706	55641871
chr1	55962182	55962422
chr1	56401049	56401219
chr1	56624501	56624680
chr1	56949664	56949827
chr1	57060085	57060342
chr1	57191715	57191920
chr1	57302560	57302728
chr1	57325843	57326002
chr1	57338465	57338620
chr1	58297167	58297398
chr1	58363750	58363902
chr1	59233416	59233605
chr1	59481093	59481294
chr1	59621519	59621671
chr1	59752094	59752301
chr1	59754029	59754205
chr1	59846838	59847158
chr1	59893524	59893676
chr1	59966261	59966476
chr1	60092343	60092526
chr1	60262782	60262973
chr1	60296159	60296438
chr1	60303893	60304167
chr1	60587005	60587218
chr1	60622187	60622415
chr1	62644654	62644819
chr1	63162671	63162839
chr1	63234478	63234644
chr1	64579311	64579463
chr1	64683270	64683436
chr1	64703327	64703482
chr1	65053802	65053982
chr1	65609866	65610021
chr1	66779880	66780037
chr1	68087456	68087608
chr1	69286080	69286261
chr1	69416787	69416947
chr1	71093508	71093753
chr1	71117343	71117559
chr1	71624794	71625008
chr1	72308022	72308234
chr1	72483639	72483796
chr1	72611296	72611482
chr1	72812085	72812331
chr1	73070305	73070460
chr1	73783811	73783996
chr1	73907603	73907783
chr1	74071462	74071668
chr1	74103313	74103476
chr1	74233074	74233322
chr1	74267910	74268086
chr1	74325941	74326144
chr1	74586966	74587178
chr1	74758582	74758873
chr1	74862818	74862978
chr1	75075452	75075735
chr1	75159742	75159902
chr1	75237163	75237331
chr1	75241325	75241530
chr1	75430727	75430883
chr1	75575213	75575389
chr1	75605668	75605826
chr1	75686941	75687195
chr1	75779655	75779838
chr1	75897816	75897974
chr1	77017974	77018126
chr1	77997515	77997705
chr1	78196825	78197027
chr1	78517588	78517745
chr1	79607958	79608222
chr1	80031054	80031260
chr1	80149778	80150044
chr1	80412025	80412200
chr1	80533914	80534079
chr1	80860032	80860192
chr1	82285286	82285496
chr1	82635127	82635288
chr1	82909735	82909994
chr1	83041777	83041929
chr1	83135282	83135582
chr1	83942482	83942693
chr1	84619720	84619964
chr1	84705306	84705573
chr1	87348472	87348624
chr1	87550411	87550570
chr1	87716363	87716585
chr1	87914827	87915087
chr1	87991040	87991192
chr1	88046550	88046767
chr1	88381428	88381719
chr1	89082078	89082239
chr1	89212057	89212317
chr1	89563714	89563871
chr1	89782870	89783048
chr1	89803211	89803404
chr1	90114722	90114892
chr1	90263991	90264145
chr1	90407593	90407790
chr1	90657394	90657574
chr1	91265399	91265644
chr1	91298328	91298485
chr1	91509172	91509370
chr1	91675167	91675349
chr1	91826649	91826819
chr1	91989398	91989604
chr1	93069163	93069340
chr1	93096258	93096453
chr1	93320665	93320829
chr1	93328785	93328937
chr1	93382838	93382994
chr1	93460693	93460922
chr1	94106282	94106453
chr1	94371830	94371990
chr1	94639565	94639726
chr1	94736910	94737065
chr1	94828266	94828538
chr1	94882177	94882402
chr1	94925921	94926141
chr1	94969150	94969384
chr1	94982780	94983013
chr1	94987772	94987973
chr1	95091601	95091761
chr1	95504410	95504596
chr1	95554098	95554288
chr1	95912446	95912599
chr1	97010154	97010363
chr1	98792790	98792945
chr1	100419695	100419895
chr1	102552638	102552901
chr1	105164465	105164638
chr1	105533509	105533731
chr1	107555181	107555386
chr1	108447259	108447456
chr1	108865808	108865980
chr1	109490155	109490336
chr1	110273344	110273525
chr1	110977973	110978203
chr1	112430258	112430457
chr1	114143219	114143402
chr1	115124657	115124850
chr1	115997394	115997565
chr1	117430407	117430572
chr1	118023803	118023965
chr1	120270808	120271065
chr1	120275173	120275500
chr1	120587299	120587526
chr1	121106079	121106332
chr1	121247411	121247599
chr1	121251708	121251871
chr1	121437032	121437281
chr1	121882565	121882717
chr1	121915596	121915863
chr1	121956664	121956816
chr1	122002403	122002570
chr1	122086931	122087120
chr1	122133755	122133972
chr1	122140617	122140909
chr1	122174331	122174572
chr1	122691775	122692107
chr1	123087559	123087724
chr1	123346535	123346703
chr1	123356723	123356912
chr1	123501847	123502017
chr1	123595624	123595782
chr1	124533558	124533725
chr1	125275110	125275271
chr1	125625941	125626093
chr1	127442868	127443128
chr1	127557562	127557758
chr1	128820182	128820392
chr1	129620484	129620707
chr1	129721676	129721851
chr1	129817767	129817934
chr1	129905735	129905957
chr1	130032088	130032312
chr1	130176746	130176940
chr1	130197987	130198286
chr1	130293458	130293673
chr1	130317132	130317327
chr1	130579394	130579546
chr1	130643174	130643355
chr1	130951912	130952120
chr1	131175212	131175389
chr1	131312678	131312913
chr1	132447396	132447642
chr1	132866410	132866650
chr1	133009255	133009517
chr1	133066118	133066285
chr1	133423025	133423296
chr1	133818519	133818677
chr1	134219386	134219671
chr1	134262299	134262497
chr1	134319992	134320163
chr1	134817804	134818031
chr1	134835718	134835870
chr1	134951092	134951267
chr1	135002009	135002183
chr1	135044998	135045178
chr1	135235760	135236012
chr1	135956439	135956592
chr1	136373179	136373331
chr1	136405402	136405578
chr1	136488471	136488660
chr1	136656933	136657085
chr1	136665223	136665421
chr1	136926046	136926246
chr1	137159012	137159215
chr1	137375434	137375613
chr1	137594114	137594353
chr1	138363100	138363291
chr1	138604675	138604903
chr1	138685800	138685952
chr1	138915572	138915760
chr1	139214710	139214960
chr1	139963429	139963658
chr1	140384225	140384388
chr1	140792780	140792957
chr1	140808886	140809137
chr1	140966806	140966970
chr1	141127532	141127781
chr1	141357601	141357755
chr1	142169936	142170138
chr1	143968217	143968369
chr1	145498591	145498743
chr1	145523040	145523192
chr1	145611657	145611872
chr1	151480365	151480521
chr1	151585104	151585256
chr1	152022643	152022807
chr1	152221520	152221680
chr1	152288951	152289103
chr1	152629051	152629276
chr1	152898311	152898525
chr1	152966168	152966427
chr1	153190713	153190932
chr1	153373509	153373703
chr1	153531429	153531644
chr1	153655732	153655884
chr1	153838760	153838916
chr1	154248961	154249132
chr1	154378649	154378823
chr1	154529280	154529448
chr1	154639328	154639583
chr1	154661401	154661600
chr1	154982752	154982923
chr1	155231407	155231577
chr1	155281424	155281576
chr1	155414368	155414614
chr1	155544813	155544995
chr1	155942011	155942197
chr1	157285620	157285866
chr1	157368445	157368790
chr1	157587725	157587917
chr1	157951187	157951402
chr1	158179505	158179725
chr1	158217826	158218032
chr1	158470056	158470219
chr1	158488235	158488417
chr1	158524311	158524491
chr1	159077810	159077966
chr1	160175706	160175925
chr1	160785607	160785784
chr1	161321049	161321222
chr1	161794283	161794558
chr1	162123851	162124020
chr1	162575689	162575859
chr1	162720917	162721082
chr1	162778648	162778850
chr1	162880589	162880772
chr1	162911898	162912068
chr1	162919596	162919835
chr1	163092611	163092787
chr1	163547886	163548046
chr1	163935383	163935541
chr1	164267412	164267609
chr1	164459897	164460115
chr1	165243624	165243785
chr1	165779701	165779864
chr1	165792751	165793028
chr1	166081768	166081935
chr1	166330615	166330797
chr1	166586833	166587084
chr1	167246825	167246977
chr1	167306673	167306840
chr1	167390681	167390848
chr1	167541867	167542031
chr1	167660892	167661105
chr1	167687159	167687338
chr1	168239648	168239825
chr1	168813471	168813654
chr1	169279413	169279663
chr1	169323438	169323660
chr1	169579706	169580133
chr1	169709974	169710144
chr1	169868422	169868624
chr1	170400200	170400352
chr1	171706909	171707063
chr1	171975299	171975475
chr1	172583008	172583214
chr1	172863671	172863880
chr1	173032226	173032423
chr1	173059411	173059607
chr1	173130666	173130855
chr1	173182643	173182813
chr1	173247112	173247317
chr1	173293693	173293865
chr1	173898558	173898754
chr1	173940574	173940809
chr1	173960788	173961097
chr1	174035373	174035543
chr1	174116617	174116797
chr1	174432084	174432306
chr1	174568012	174568164
chr1	175360232	175360462
chr1	176217123	176217295
chr1	176800674	176800827
chr1	176959072	176959243
chr1	177449609	177449761
chr1	177895322	177895562
chr1	178820895	178821104
chr1	178835782	178835990
chr1	179655626	179655829
chr1	180229541	180229737
chr1	180279834	180280048
chr1	180882100	180882282
chr1	181165611	181165804
chr1	181195519	181195741
chr1	181351880	181352126
chr1	181400918	181401136
chr1	181413875	181414104
chr1	181583228	181583403
chr1	181723114	181723376
chr1	182112099	182112378
chr1	182214333	182214513
chr1	182673681	182673852
chr1	182691315	182691467
chr1	182794835	182795032
chr1	182930457	182930637
chr1	183017542	183017694
chr1	183058115	183058270
chr1	183357711	183357917
chr1	183583332	183583484
chr1	183607802	183607960
chr1	183701762	183701982
chr1	183764717	183765171
chr1	183938312	183938532
chr1	184078076	184078319
chr1	184694198	184694482
chr1	184898495	184898649
chr1	184905798	184906024
chr1	186523332	186523523
chr1	187206089	187206251
chr1	187250220	187250460
chr1	188058387	188058544
chr1	189563329	189563506
chr1	190347164	190347360
chr1	190690922	190691284
chr1	191647373	191647544
chr1	191684294	191684474
chr1	191825736	191825911
chr1	192073466	192073681
chr1	192534207	192534383
chr1	192564467	192564721
chr1	192823592	192823750
chr1	192881434	192881630
chr1	193140769	193140952
chr1	193408382	193408569
chr1	194156092	194156329
chr1	194417219	194417496
chr1	194942676	194942861
chr1	195227977	195228265
chr1	195383794	195384016
chr1	196815401	196815589
chr10	3221187	3221391
chr10	3324414	3324623
chr10	4231348	4231573
chr10	4483551	4483736
chr10	4563603	4563840
chr10	5151375	5151545
chr10	5717620	5717779
chr10	5824105	5824363
chr10	6004864	6005028
chr10	6146347	6146561
chr10	6199016	6199215
chr10	6393242	6393492
chr10	6478903	6479096
chr10	6533732	6533990
chr10	6606063	6606258
chr10	7334670	7334846
chr10	7401662	7401814
chr10	7431267	7431453
chr10	7553755	7553928
chr10	8238071	8238223
chr10	8256558	8256746
chr10	8490807	8491018
chr10	8597580	8597892
chr10	9541169	9541363
chr10	9901791	9901996
chr10	10931907	10932118
chr10	11158221	11158417
chr10	11212991	11213143
chr10	11980195	11980356
chr10	12485961	12486129
chr10	13736097	13736277
chr10	14460812	14460969
chr10	16863308	16863476
chr10	17792190	17792407
chr10	17956212	17956395
chr10	18067406	18067747
chr10	18113293	18113457
chr10	18119160	18119430
chr10	18614142	18614294
chr10	19571277	19571488
chr10	19872007	19872172
chr10	20035672	20035975
chr10	20210708	20210871
chr10	20972682	20972948
chr10	21373274	21373505
chr10	21728996	21729260
chr10	21976458	21976632
chr10	23529801	23529961
chr10	23714351	23714576
chr10	24771804	24772032
chr10	24804044	24804196
chr10	25502402	25502585
chr10	25628167	25628415
chr10	26042197	26042466
chr10	26552590	26552771
chr10	26669584	26669855
chr10	26809709	26809881
chr10	26933019	26933256
chr10	27795965	27796117
chr10	27827406	27827587
chr10	28088445	28088601
chr10	28160299	28160484
chr10	28203903	28204055
chr10	28336735	28336887
chr10	30176980	30177164
chr10	30327784	30328040
chr10	30476691	30476885
chr10	30520016	30520177
chr10	30521930	30522082
chr10	30601257	30601445
chr10	30948935	30949101
chr10	32021110	32021277
chr10	32960286	32960446
chr10	33646731	33646932
chr10	33672422	33672582
chr10	33898055	33898280
chr10	34032445	34032641
chr10	35212305	35212520
chr10	36225899	36226064
chr10	38842386	38842613
chr10	39375086	39375285
chr10	39452844	39453021
chr10	39898333	39898492
chr10	40004598	40004783
chr10	40290376	40290610
chr10	40445043	40445224
chr10	41001147	41001299
chr10	41052465	41052630
chr10	41112477	41112629
chr10	41456493	41456662
chr10	41746622	41746798
chr10	41749369	41749542
chr10	41790520	41790701
chr10	41862124	41862306
chr10	42016975	42017215
chr10	42018279	42018433
chr10	42086589	42086753
chr10	42223950	42224159
chr10	42230030	42230256
chr10	42316385	42316568
chr10	42365837	42365995
chr10	42559953	42560191
chr10	43176210	43176389
chr10	43182218	43182370
chr10	43299234	43299466
chr10	43302369	43302554
chr10	43748950	43749187
chr10	43898750	43898953
chr10	44621636	44621800
chr10	44735387	44735582
chr10	45159567	45159748
chr10	45740816	45741016
chr10	46548137	46548387
chr10	47225418	47225570
chr10	47561009	47561182
chr10	48829107	48829390
chr10	49855387	49855588
chr10	49919780	49919975
chr10	51880481	51880679
chr10	52004494	52004946
chr10	52159295	52159519
chr10	52257017	52257208
chr10	52265474	52265660
chr10	52461044	52461226
chr10	53110094	53110246
chr10	53318828	53319000
chr10	53430109	53430372
chr10	54193241	54193412
chr10	54387445	54387609
chr10	56085567	56085719
chr10	56126286	56126455
chr10	57844309	57844515
chr10	57868799	57868958
chr10	58173234	58173398
chr10	58917470	58917655
chr10	58935796	58936018
chr10	58990179	58990340
chr10	59017128	59017284
chr10	59056702	59056864
chr10	59321491	59321672
chr10	59455880	59456037
chr10	59569556	59569736
chr10	59621377	59621646
chr10	59653999	59654308
chr10	59684435	59684611
chr10	59685090	59685283
chr10	59944175	59944404
chr10	60068373	60068610
chr10	60231253	60231427
chr10	60237395	60237771
chr10	60594226	60594386
chr10	60900336	60900512
chr10	60902495	60902666
chr10	60931738	60931940
chr10	60950779	60951062
chr10	61246640	61246868
chr10	61439917	61440140
chr10	61725259	61725498
chr10	61776950	61777102
chr10	61864068	61864235
chr10	62167249	62167505
chr10	62257063	62257309
chr10	62288811	62288996
chr10	62314799	62314977
chr10	62331397	62331586
chr10	62360636	62360788
chr10	62428294	62428505
chr10	62676507	62676713
chr10	63262453	63262751
chr10	65038146	65038337
chr10	66380861	66381070
chr10	66563197	66563442
chr10	66605668	66605862
chr10	66888266	66888440
chr10	66899337	66899516
chr10	67012070	67012321
chr10	67177003	67177269
chr10	67356932	67357156
chr10	67395017	67395284
chr10	67440153	67440311
chr10	67783043	67783209
chr10	68122760	68122967
chr10	68306879	68307123
chr10	68567834	68568018
chr10	68642187	68642398
chr10	68671574	68671776
chr10	68720130	68720332
chr10	68792362	68792534
chr10	68833295	68833495
chr10	68840502	68840677
chr10	68861527	68861740
chr10	68885133	68885287
chr10	69124484	69124636
chr10	69591283	69591555
chr10	69600516	69600675
chr10	69669376	69669633
chr10	69744680	69744889
chr10	69783144	69783319
chr10	69793626	69793872
chr10	69922677	69922859
chr10	69943648	69943895
chr10	70040515	70040764
chr10	70074335	70074487
chr10	70341594	70341752
chr10	70616445	70616645
chr10	70787543	70787773
chr10	70878014	70878166
chr10	70905807	70906000
chr10	72877840	72878074
chr10	74124668	74124820
chr10	74326305	74326475
chr10	74365606	74365758
chr10	74397305	74397530
chr10	74401293	74401478
chr10	74644599	74644753
chr10	74723456	74723816
chr10	75087714	75088013
chr10	75203165	75203323
chr10	75221453	75221711
chr10	75223180	75223381
chr10	75307748	75307963
chr10	75418820	75418986
chr10	75472890	75473088
chr10	75479418	75479662
chr10	75645183	75645347
chr10	75776468	75776628
chr10	75886389	75886543
chr10	75931496	75931729
chr10	76603989	76604170
chr10	77077518	77077769
chr10	77224275	77224572
chr10	77530044	77530221
chr10	77839711	77839938
chr10	77968292	77968509
chr10	78554634	78554786
chr10	79201086	79201285
chr10	79210428	79210684
chr10	79429357	79429516
chr10	79551950	79552105
chr10	79584254	79584411
chr10	79868612	79868828
chr10	80102183	80102365
chr10	80420674	80420857
chr10	80459515	80459806
chr10	80568838	80569068
chr10	80665777	80665959
chr10	80735550	80735860
chr10	80809618	80809770
chr10	80896563	80896734
chr10	80906518	80906672
chr10	80938357	80938509
chr10	81082553	81082753
chr10	81463489	81463651
chr10	81509385	81509640
chr10	82102128	82102322
chr10	82261375	82261626
chr10	82279014	82279231
chr10	82372622	82372877
chr10	82448600	82448826
chr10	82707850	82708078
chr10	82750650	82750881
chr10	83111523	83111692
chr10	83167044	83167231
chr10	83170968	83171132
chr10	83342488	83342672
chr10	83397314	83397466
chr10	83807168	83807353
chr10	83945909	83946083
chr10	84298975	84299143
chr10	84570338	84570600
chr10	84590885	84591099
chr10	84618905	84619145
chr10	84900067	84900285
chr10	85002682	85002845
chr10	85299234	85299410
chr10	85564948	85565174
chr10	86191788	86191962
chr10	87391341	87391496
chr10	87551955	87552202
chr10	87837808	87838032
chr10	88022463	88022620
chr10	88179847	88180024
chr10	88201487	88201686
chr10	89145788	89146045
chr10	89159144	89159304
chr10	89952579	89952731
chr10	90181524	90181727
chr10	90327339	90327517
chr10	90579795	90580007
chr10	90742546	90742702
chr10	90747117	90747430
chr10	90820294	90820561
chr10	90976876	90977162
chr10	91197581	91197741
chr10	92296182	92296336
chr10	93066091	93066243
chr10	93176658	93176825
chr10	93306257	93306499
chr10	93703683	93703935
chr10	93842883	93843144
chr10	94173143	94173363
chr10	95242652	95242911
chr10	95795927	95796105
chr10	98619595	98619804
chr10	98631557	98631798
chr10	99057988	99058242
chr10	99975832	99976094
chr10	100236559	100236717
chr10	101187244	101187415
chr10	102039357	102039529
chr10	102622446	102622673
chr10	102732575	102732777
chr10	105042658	105042921
chr10	105384427	105384588
chr10	106850358	106850606
chr10	107728156	107728435
chr10	107740640	107740809
chr10	107774481	107774689
chr10	107807311	107807495
chr10	107899357	107899571
chr10	108029112	108029264
chr10	109523098	109523311
chr10	110055257	110055533
chr10	110194164	110194407
chr10	110199141	110199418
chr10	110716092	110716279
chr10	111318768	111318984
chr10	114578277	114578460
chr10	114601110	114601302
chr10	114722896	114723066
chr10	114754615	114754794
chr10	114755552	114755767
chr10	114757820	114757984
chr10	114796242	114796402
chr10	114881810	114882003
chr10	114966921	114967108
chr10	115021768	115022011
chr10	115455446	115455598
chr10	115855276	115855544
chr10	116115695	116115862
chr10	116301048	116301206
chr10	116320661	116320878
chr10	116523218	116523382
chr10	116579034	116579273
chr10	116803953	116804105
chr10	116808258	116808435
chr10	116810249	116810446
chr10	116873143	116873336
chr10	116915361	116915561
chr10	116979659	116979811
chr10	117131131	117131315
chr10	117163787	117164129
chr10	117261307	117261497
chr10	117353361	117353515
chr10	117562948	117563175
chr10	117822037	117822204
chr10	118042596	118042753
chr10	118347228	118347438
chr10	118489528	118489701
chr10	118681136	118681368
chr10	118714889	118715053
chr10	118748417	118748622
chr10	118776897	118777066
chr10	118929320	118929556
chr10	118935528	118935732
chr10	119735389	119735746
chr10	119869320	119869509
chr10	119924069	119924293
chr10	120366651	120366849
chr10	120440645	120440881
chr10	120444999	120445152
chr10	120793354	120793562
chr10	120993286	120993632
chr10	121042135	121042364
chr10	121116336	121116496
chr10	121124630	121124980
chr10	121190191	121190391
chr10	122229648	122229800
chr10	122427735	122427966
chr10	122628181	122628428
chr10	123167588	123167778
chr10	124754437	124754672
chr10	125062423	125062641
chr10	125070428	125070624
chr10	125225426	125225610
chr10	125267126	125267316
chr10	125625480	125625660
chr10	125882219	125882371
chr10	125890995	125891161
chr10	126236527	126236768
chr10	126310885	126311144
chr10	126315176	126315328
chr10	126370662	126370862
chr10	126390911	126391167
chr10	126509468	126509654
chr10	126866630	126866926
chr10	126918297	126918451
chr10	127048004	127048292
chr10	127441807	127442025
chr10	127449550	127449742
chr10	127484063	127484270
chr10	127503276	127503586
chr10	127535596	127535754
chr10	127624629	127624827
chr10	127658670	127658933
chr10	127718875	127719027
chr10	127724905	127725057
chr10	127746793	127746982
chr10	127785785	127785967
chr10	128032461	128032624
chr10	128066136	128066332
chr10	128158476	128158684
chr10	128169508	128169660
chr10	128242618	128242779
chr10	128271565	128271813
chr10	128339009	128339182
chr10	128367866	128368046
chr11	3072093	3072335
chr11	3109945	3110112
chr11	3217534	3217757
chr11	3480977	3481218
chr11	3491636	3491794
chr11	3502044	3502196
chr11	3650007	3650177
chr11	3653953	3654166
chr11	3868863	3869054
chr11	4349185	4349354
chr11	4762820	4762972
chr11	5018295	5018495
chr11	5221785	5221965
chr11	5225520	5225672
chr11	5274285	5274474
chr11	5442252	5442432
chr11	5603429	5603618
chr11	5644888	5645085
chr11	5855175	5855403
chr11	6080889	6081111
chr11	6122268	6122522
chr11	6123428	6123657
chr11	6192114	6192274
chr11	6221864	6222047
chr11	6344602	6344777
chr11	6345646	6345804
chr11	6363243	6363434
chr11	6426763	6426953
chr11	6486794	6486986
chr11	6541754	6541906
chr11	7344587	7344762
chr11	7346143	7346323
chr11	7631852	7632011
chr11	7664060	7664253
chr11	8351921	8352096
chr11	8490866	8491039
chr11	8771507	8771659
chr11	9079808	9079960
chr11	9150585	9150777
chr11	10222628	10222848
chr11	11294789	11294947
chr11	11585968	11586190
chr11	12105916	12106130
chr11	12414919	12415079
chr11	16579176	16579333
chr11	16919396	16919657
chr11	17022689	17022871
chr11	17092245	17092413
chr11	17540031	17540184
chr11	18896378	18896567
chr11	18908240	18908425
chr11	19300523	19300685
chr11	19614395	19614633
chr11	19824261	19824527
chr11	19872503	19872749
chr11	19996446	19996606
chr11	19997423	19997614
chr11	20006709	20006923
chr11	20047596	20047748
chr11	20143279	20143497
chr11	20264294	20264480
chr11	20289701	20289853
chr11	20397828	20398055
chr11	20549596	20549831
chr11	20628684	20628836
chr11	20921982	20922223
chr11	21074123	21074285
chr11	21638559	21638745
chr11	22079459	22079698
chr11	22577332	22577624
chr11	22593156	22593310
chr11	22594053	22594297
chr11	22851699	22851918
chr11	23015038	23015323
chr11	23379836	23380038
chr11	23552551	23552708
chr11	23921367	23921524
chr11	24643557	24643709
chr11	26542260	26542447
chr11	26706324	26706574
chr11	29138123	29138408
chr11	29412973	29413180
chr11	29449139	29449349
chr11	29615611	29615799
chr11	29723771	29724029
chr11	30142572	30142724
chr11	30388854	30389025
chr11	30706631	30706885
chr11	30754188	30754437
chr11	30880878	30881075
chr11	31275367	31275572
chr11	31615340	31615492
chr11	31777940	31778092
chr11	32299667	32299849
chr11	32355396	32355580
chr11	32400011	32400184
chr11	32492140	32492330
chr11	32821290	32821472
chr11	32898800	32899003
chr11	33235706	33235858
chr11	33383550	33383781
chr11	33417064	33417283
chr11	34312502	34312705
chr11	34695117	34695293
chr11	35101207	35101390
chr11	35292378	35292560
chr11	35417530	35417718
chr11	35513265	35513469
chr11	35541856	35542008
chr11	35596569	35596799
chr11	35625067	35625250
chr11	35650761	35650954
chr11	36024970	36025178
chr11	36105839	36106016
chr11	36338244	36338398
chr11	39225764	39225916
chr11	40436239	40436425
chr11	40501909	40502093
chr11	42002747	42002928
chr11	42120781	42120986
chr11	42139960	42140145
chr11	43728879	43729153
chr11	43773747	43773971
chr11	45128246	45128462
chr11	45396026	45396208
chr11	45849263	45849455
chr11	46115395	46115654
chr11	46125539	46125792
chr11	46243692	46243903
chr11	46261078	46261287
chr11	46450214	46450369
chr11	47201350	47201519
chr11	47882129	47882323
chr11	48523927	48524085
chr11	48562295	48562466
chr11	48564023	48564237
chr11	48690239	48690482
chr11	48884777	48884961
chr11	48983060	48983212
chr11	49601160	49601318
chr11	50090607	50090791
chr11	50510576	50510756
chr11	51190803	51191010
chr11	51402866	51403083
chr11	51515785	51515947
chr11	51549420	51549572
chr11	51572514	51572666
chr11	51615285	51615483
chr11	51890312	51890542
chr11	52164560	52164762
chr11	52447843	52447998
chr11	52545569	52545842
chr11	52551865	52552019
chr11	52742528	52742685
chr11	52799682	52799934
chr11	52833102	52833254
chr11	53117665	53117817
chr11	53183150	53183436
chr11	53254040	53254209
chr11	53254507	53254730
chr11	53396781	53396973
chr11	53577451	53577665
chr11	54016787	54016939
chr11	54376357	54376545
chr11	54408524	54408737
chr11	54665249	54665491
chr11	54814308	54814480
chr11	54826768	54826927
chr11	55218378	55218536
chr11	55274175	55274382
chr11	55291769	55292181
chr11	55840489	55840684
chr11	55987487	55987656
chr11	56535151	56535303
chr11	56689495	56689682
chr11	56790367	56790531
chr11	57520695	57520916
chr11	57600673	57600875
chr11	57621893	57622078
chr11	57638370	57638701
chr11	57726686	57726839
chr11	57877040	57877204
chr11	57881158	57881313
chr11	57908635	57908808
chr11	57920655	57920811
chr11	58003583	58003860
chr11	58072379	58072557
chr11	58268999	58269214
chr11	58919543	58919743
chr11	58942688	58942873
chr11	58966826	58967051
chr11	59159551	59159703
chr11	59169340	59169492
chr11	59169592	59169773
chr11	59589036	59589250
chr11	59805525	59805760
chr11	60036472	60036707
chr11	60079200	60079379
chr11	60266892	60267116
chr11	60509765	60509990
chr11	60548819	60549029
chr11	60585874	60586038
chr11	60661145	60661297
chr11	60736486	60736655
chr11	61384655	61384808
chr11	61450993	61451236
chr11	61574013	61574253
chr11	61587859	61588044
chr11	61598560	61598769
chr11	61624402	61624618
chr11	61651147	61651489
chr11	61824225	61824538
chr11	62241408	62241615
chr11	62243424	62243712
chr11	62326166	62326343
chr11	62332090	62332243
chr11	62358502	62358885
chr11	62704850	62705024
chr11	62967469	62967629
chr11	62982165	62982317
chr11	63029600	63029831
chr11	63152693	63152887
chr11	63301445	63301699
chr11	63378810	63378962
chr11	63818549	63818701
chr11	64011083	64011246
chr11	64043687	64043854
chr11	65225443	65225617
chr11	65650658	65650810
chr11	65789500	65789738
chr11	65819019	65819231
chr11	66495459	66495711
chr11	66658859	66659011
chr11	66803385	66803630
chr11	66884407	66884560
chr11	66909171	66909347
chr11	67005085	67005337
chr11	67735024	67735257
chr11	67768755	67769043
chr11	67776483	67776776
chr11	68036696	68036937
chr11	68155198	68155372
chr11	68171350	68171568
chr11	68213968	68214146
chr11	68272333	68272515
chr11	68302039	68302191
chr11	68654953	68655141
chr11	68675176	68675377
chr11	68829436	68829646
chr11	68923424	68923593
chr11	68997742	68997894
chr11	69044067	69044227
chr11	69057412	69057627
chr11	69176005	69176210
chr11	69460635	69460832
chr11	69519273	69519444
chr11	69524496	69524686
chr11	69618611	69618776
chr11	69807981	69808133
chr11	70008830	70008984
chr11	70123327	70123500
chr11	70231535	70231814
chr11	70234394	70234547
chr11	70278848	70279000
chr11	70333677	70333829
chr11	70336979	70337136
chr11	70371154	70371355
chr11	70424410	70424584
chr11	70568607	70568771
chr11	70716477	70716684
chr11	70768785	70769047
chr11	70842968	70843138
chr11	71038223	71038397
chr11	71317246	71317427
chr11	71590200	71590387
chr11	72125302	72125474
chr11	72154538	72154737
chr11	72355242	72355441
chr11	72369781	72370031
chr11	72628259	72628451
chr11	73019285	73019447
chr11	73806679	73806844
chr11	73874394	73874786
chr11	74295344	74295610
chr11	74364287	74364475
chr11	74420603	74420763
chr11	74472073	74472291
chr11	74510321	74510496
chr11	74608154	74608318
chr11	74642303	74642480
chr11	74648875	74649034
chr11	74744405	74744623
chr11	74797486	74797675
chr11	74943529	74943749
chr11	75004101	75004290
chr11	75078207	75078375
chr11	75203858	75204052
chr11	75207960	75208128
chr11	75301883	75302092
chr11	75330539	75330704
chr11	75438927	75439108
chr11	75466842	75467057
chr11	75479510	75479736
chr11	75622270	75622422
chr11	75639383	75639597
chr11	75805470	75805746
chr11	75907220	75907372
chr11	76000490	76000704
chr11	76061184	76061364
chr11	76242674	76243029
chr11	76277165	76277317
chr11	76631292	76631513
chr11	76949270	76949511
chr11	77485682	77485840
chr11	77491776	77491936
chr11	77510872	77511106
chr11	77619845	77620011
chr11	77789458	77789650
chr11	77816625	77816855
chr11	77822645	77822797
chr11	77899142	77899294
chr11	77907504	77907686
chr11	78017642	78017819
chr11	78154582	78154771
chr11	78262225	78262525
chr11	78273325	78273477
chr11	78332593	78332745
chr11	78915884	78916099
chr11	78990331	78990485
chr11	79112519	79112712
chr11	79114978	79115139
chr11	79164251	79164539
chr11	79221428	79221630
chr11	79620358	79620538
chr11	79703105	79703265
chr11	79820449	79820626
chr11	79875289	79875478
chr11	79951105	79951263
chr11	79993221	79993461
chr11	79994936	79995158
chr11	80139833	80140106
chr11	80182565	80182747
chr11	80184368	80184521
chr11	80271084	80271311
chr11	80359723	80359941
chr11	80473098	80473259
chr11	81511627	81511779
chr11	82200403	82200635
chr11	82258355	82258529
chr11	82340942	82341105
chr11	82504957	82505109
chr11	82576864	82577057
chr11	82701518	82701719
chr11	83037751	83037955
chr11	83232229	83232449
chr11	83315583	83315864
chr11	83316385	83316592
chr11	83413649	83413864
chr11	83446376	83446581
chr11	83580061	83580355
chr11	83879806	83879963
chr11	84000947	84001102
chr11	84006888	84007171
chr11	84178900	84179087
chr11	84297295	84297467
chr11	84592164	84592316
chr11	84828530	84828720
chr11	85644614	85644781
chr11	85814188	85814340
chr11	85853609	85853764
chr11	86075732	86075995
chr11	86272239	86272418
chr11	86386243	86386423
chr11	86571357	86571590
chr11	86887452	86887654
chr11	86893286	86893494
chr11	87007170	87007358
chr11	87197497	87197696
chr11	87243341	87243556
chr11	87260992	87261182
chr11	87263602	87263841
chr11	87265948	87266154
chr11	87278013	87278231
chr11	87282550	87282790
chr11	87319533	87319689
chr11	87657832	87658002
chr11	87717640	87717831
chr11	87792521	87792673
chr11	87855928	87856105
chr11	87889293	87889520
chr11	88073628	88073780
chr11	88085539	88085791
chr11	88111074	88111278
chr11	88179583	88179746
chr11	88363187	88363355
chr11	88661346	88661551
chr11	88763760	88763937
chr11	88821552	88821749
chr11	88823072	88823224
chr11	88937704	88937913
chr11	89110746	89110912
chr11	89798612	89798825
chr11	89916990	89917193
chr11	89926864	89927111
chr11	90242439	90242627
chr11	90485334	90485491
chr11	90579089	90579320
chr11	90753020	90753175
chr11	91024082	91024234
chr11	91755058	91755251
chr11	93811342	93811498
chr11	94120599	94120793
chr11	94168433	94168617
chr11	94352578	94352962
chr11	94407725	94407913
chr11	94425757	94426015
chr11	94440232	94440409
chr11	94589336	94589520
chr11	94665259	94665534
chr11	94710182	94710375
chr11	94828414	94828574
chr11	94906498	94906650
chr11	94973098	94973332
chr11	95121270	95121453
chr11	95144060	95144212
chr11	95157313	95157565
chr11	95275843	95276021
chr11	95293212	95293382
chr11	95308278	95308461
chr11	95381400	95381555
chr11	95530269	95530433
chr11	95583160	95583469
chr11	95649259	95649426
chr11	95663662	95663899
chr11	95811639	95811818
chr11	95812899	95813151
chr11	95813350	95813632
chr11	95839899	95840079
chr11	96026942	96027105
chr11	96277189	96277455
chr11	96553645	96553879
chr11	96570694	96570862
chr11	96652590	96652893
chr11	96864505	96864683
chr11	96987502	96987654
chr11	97121215	97121500
chr11	97154215	97154400
chr11	97277548	97277700
chr11	97571491	97571785
chr11	97741960	97742145
chr11	97745973	97746133
chr11	97830049	97830211
chr11	97845417	97845601
chr11	97857403	97857663
chr11	97891260	97891447
chr11	98104300	98104476
chr11	98139470	98139644
chr11	98380091	98380243
chr11	98410763	98410931
chr11	98465373	98465584
chr11	98734269	98734421
chr11	98951808	98951997
chr11	99078707	99078859
chr11	99175223	99175424
chr11	99268820	99268995
chr11	100090464	100090648
chr11	100125713	100125872
chr11	100388444	100388685
chr11	100639664	100639917
chr11	100846517	100846669
chr11	100922133	100922285
chr11	101074273	101074432
chr11	101097680	101097897
chr11	101267159	101267386
chr11	101375307	101375547
chr11	101403380	101403807
chr11	101502659	101502831
chr11	101595860	101596019
chr11	101623010	101623162
chr11	101907755	101907949
chr11	102042771	102042954
chr11	102138019	102138189
chr11	102141719	102141929
chr11	102544816	102544968
chr11	102636200	102636412
chr11	102710489	102710667
chr11	102750289	102750486
chr11	102800400	102800594
chr11	102885379	102885551
chr11	102904252	102904453
chr11	103213680	103213907
chr11	103621399	103621587
chr11	103702290	103702457
chr11	103759874	103760032
chr11	103811199	103811364
chr11	103816800	103817225
chr11	103862354	103862523
chr11	104173978	104174143
chr11	104276981	104277138
chr11	104324151	104324304
chr11	104369813	104370019
chr11	104521978	104522274
chr11	104627125	104627390
chr11	104860166	104860361
chr11	105048991	105049200
chr11	105066239	105066395
chr11	105121821	105122063
chr11	105241247	105241423
chr11	105246104	105246276
chr11	106242433	106242629
chr11	106328422	106328639
chr11	106367652	106367865
chr11	106427141	106427293
chr11	106427953	106428187
chr11	106904438	106904618
chr11	106977346	106977586
chr11	106996596	106996822
chr11	107014341	107014597
chr11	107073742	107073921
chr11	107252772	107253027
chr11	107291951	107292113
chr11	107390806	107390959
chr11	107421678	107421833
chr11	108277706	108277889
chr11	108781887	108782100
chr11	109445382	109445534
chr11	109490950	109491170
chr11	110270516	110270668
chr11	110301616	110301820
chr11	110397985	110398153
chr11	112266316	112266592
chr11	112386396	112386578
chr11	112394513	112394668
chr11	112452231	112452389
chr11	112552231	112552383
chr11	112611106	112611265
chr11	112717753	112717918
chr11	113199978	113200147
chr11	113237490	113237688
chr11	113267103	113267288
chr11	113466737	113466915
chr11	113768399	113768554
chr11	113908358	113908533
chr11	113976213	113976377
chr11	114332090	114332347
chr11	114500907	114501337
chr11	114941492	114941904
chr11	115210424	115210595
chr11	115273957	115274145
chr11	115306019	115306232
chr11	115389783	115389980
chr11	115435650	115435802
chr11	115462947	115463111
chr11	115563186	115563338
chr11	115586452	115586605
chr11	115694513	115694741
chr11	115803371	115803633
chr11	115977742	115977894
chr11	116083197	116083408
chr11	116212721	116212921
chr11	116352777	116352956
chr11	116394489	116394712
chr11	116446619	116446806
chr11	116456357	116456518
chr11	116477527	116477699
chr11	116530304	116530456
chr11	116740924	116741084
chr11	116770662	116770830
chr11	116843945	116844099
chr11	116912230	116912408
chr11	116992782	116992934
chr11	117032168	117032418
chr11	117217365	117217563
chr11	117547956	117548122
chr11	117589320	117589498
chr11	117671848	117672085
chr11	117756050	117756251
chr11	117810707	117810873
chr11	117825380	117825550
chr11	117902896	117903127
chr11	117985582	117985883
chr11	118402600	118402752
chr11	118515871	118516167
chr11	118570521	118570742
chr11	118599255	118599500
chr11	118862264	118862545
chr11	118867868	118868105
chr11	119193372	119193525
chr11	119285203	119285415
chr11	119314797	119315069
chr11	119407259	119407416
chr11	119811312	119811545
chr11	119890274	119890471
chr11	119934642	119934806
chr11	119988248	119988436
chr11	120218468	120218650
chr11	120310420	120310787
chr11	120382912	120383086
chr11	120532399	120532586
chr11	120857122	120857299
chr11	120976802	120977094
chr11	121045476	121045694
chr11	121045815	121045995
chr11	121151299	121151528
chr11	121240063	121240215
chr11	121383080	121383249
chr11	121771870	121772051
chr11	121809137	121809332
chr11	121839355	121839513
chr12	3266959	3267177
chr12	3425519	3425688
chr12	3449075	3449227
chr12	3572203	3572364
chr12	3590010	3590294
chr12	3597433	3597601
chr12	4286165	4286363
chr12	4523581	4523815
chr12	4550730	4550948
chr12	4610761	4610925
chr12	4879184	4879405
chr12	5314820	5314990
chr12	6362230	6362396
chr12	7449849	7450129
chr12	8266236	8266472
chr12	8314914	8315066
chr12	8707270	8707466
chr12	8728910	8729136
chr12	8733791	8734021
chr12	8886303	8886471
chr12	8910943	8911111
chr12	9005689	9006066
chr12	9840155	9840408
chr12	10164587	10164779
chr12	10274494	10274710
chr12	10416784	10417017
chr12	11339297	11339475
chr12	12446377	12446536
chr12	12660652	12660837
chr12	12863569	12863722
chr12	15902169	15902334
chr12	16290040	16290215
chr12	16514246	16514461
chr12	16740866	16741019
chr12	16853205	16853388
chr12	17113092	17113286
chr12	17365861	17366121
chr12	17370521	17370673
chr12	17420667	17420851
chr12	17574697	17574849
chr12	17999352	17999628
chr12	18173272	18173424
chr12	18231340	18231620
chr12	18244396	18244651
chr12	18332729	18332911
chr12	18365791	18365968
chr12	18522136	18522315
chr12	18612992	18613171
chr12	18804021	18804173
chr12	19001294	19001446
chr12	19563967	19564124
chr12	19960859	19961029
chr12	20174273	20174441
chr12	20690493	20690675
chr12	20768848	20769087
chr12	21030487	21030661
chr12	21184412	21184586
chr12	21367067	21367224
chr12	21475240	21475392
chr12	21550810	21551027
chr12	21552589	21552774
chr12	22901188	22901345
chr12	23442473	23442629
chr12	24436353	24436506
chr12	25145651	25145868
chr12	25184960	25185200
chr12	25530361	25530545
chr12	25593944	25594115
chr12	28866258	28866428
chr12	29275645	29275797
chr12	29306419	29306601
chr12	30278175	30278342
chr12	30788122	30788379
chr12	31135588	31135766
chr12	32379509	32379756
chr12	32380830	32380986
chr12	32409468	32409625
chr12	32429118	32429274
chr12	32432223	32432535
chr12	32542326	32542531
chr12	32581882	32582078
chr12	32977751	32977909
chr12	33412486	33412638
chr12	33612424	33612643
chr12	34137553	34137757
chr12	34894393	34894546
chr12	35579646	35579847
chr12	35622704	35622858
chr12	36725661	36725891
chr12	37735172	37735327
chr12	38309467	38309672
chr12	38360962	38361146
chr12	39506716	39506955
chr12	39793727	39793913
chr12	40861281	40861745
chr12	40982716	40982868
chr12	41406521	41406679
chr12	41651007	41651198
chr12	42783236	42783392
chr12	42877680	42877912
chr12	44515481	44515646
chr12	45612907	45613158
chr12	46224076	46224228
chr12	50486239	50486416
chr12	52518168	52518324
chr12	52716569	52716815
chr12	52894980	52895146
chr12	52905596	52905802
chr12	52982905	52983077
chr12	53056896	53057073
chr12	53382316	53382474
chr12	53719482	53719688
chr12	53973707	53973859
chr12	54119671	54119839
chr12	54847742	54847913
chr12	55209252	55209479
chr12	55246605	55246781
chr12	55328646	55328822
chr12	55418353	55418521
chr12	55654266	55654512
chr12	55964242	55964422
chr12	56093323	56093538
chr12	56147000	56147182
chr12	56330269	56330421
chr12	56802183	56802335
chr12	56824461	56824629
chr12	56902210	56902396
chr12	57200322	57200479
chr12	57644889	57645084
chr12	58226012	58226240
chr12	58246331	58246483
chr12	58357391	58357554
chr12	58649405	58649591
chr12	58804335	58804587
chr12	59326205	59326394
chr12	60147254	60147419
chr12	60240451	60240647
chr12	60323919	60324084
chr12	60327791	60328017
chr12	60677313	60677531
chr12	60767193	60767378
chr12	63870122	63870301
chr12	65727702	65727875
chr12	67328285	67328460
chr12	67525137	67525297
chr12	68368437	68368644
chr12	69692291	69692504
chr12	70053388	70053540
chr12	70274260	70274434
chr12	70306160	70306537
chr12	70386783	70386971
chr12	70489324	70489476
chr12	70842888	70843041
chr12	71139339	71139568
chr12	71314345	71314497
chr12	71864787	71864953
chr12	72142182	72142404
chr12	72231826	72232035
chr12	72286227	72286483
chr12	72326802	72326966
chr12	72670671	72670823
chr12	72864263	72864460
chr12	73113245	73113403
chr12	73176668	73176860
chr12	73386448	73386605
chr12	73402538	73402706
chr12	73533347	73533499
chr12	73686137	73686293
chr12	73795954	73796279
chr12	73800468	73800620
chr12	73815158	73815310
chr12	73840794	73840961
chr12	74122627	74122779
chr12	74236396	74236782
chr12	74465336	74465494
chr12	74475591	74475773
chr12	74606504	74606656
chr12	74684842	74685080
chr12	75111955	75112142
chr12	76550845	76551002
chr12	76568903	76569058
chr12	76732305	76732507
chr12	77074346	77074520
chr12	77095108	77095308
chr12	77144532	77144729
chr12	77146827	77147045
chr12	77301373	77301600
chr12	77307580	77307776
chr12	77363442	77363665
chr12	77446811	77446987
chr12	77492952	77493146
chr12	77616647	77616831
chr12	77686079	77686335
chr12	77811144	77811298
chr12	77869090	77869305
chr12	78005801	78005991
chr12	78725365	78725561
chr12	79063165	79063391
chr12	79099654	79099847
chr12	79193802	79193962
chr12	79823123	79823285
chr12	79872056	79872220
chr12	79957397	79957684
chr12	79975668	79975869
chr12	80146689	80146870
chr12	80495146	80495298
chr12	80756189	80756408
chr12	80785453	80785645
chr12	81227193	81227345
chr12	81324396	81324548
chr12	81360401	81360708
chr12	81691300	81691493
chr12	81721756	81721926
chr12	81727751	81727922
chr12	81735608	81735802
chr12	81991810	81992005
chr12	82039210	82039368
chr12	82113097	82113262
chr12	82269632	82269844
chr12	82708886	82709045
chr12	83183652	83183839
chr12	83201953	83202152
chr12	83301895	83302047
chr12	83394573	83394869
chr12	83873344	83873502
chr12	83938032	83938244
chr12	84313092	84313267
chr12	84421659	84421858
chr12	84622607	84622771
chr12	84762163	84762321
chr12	84765130	84765291
chr12	84850801	84851017
chr12	84859244	84859396
chr12	85088056	85088245
chr12	85113109	85113330
chr12	85205626	85205778
chr12	85218379	85218568
chr12	85504817	85504973
chr12	85568471	85568653
chr12	85599405	85599614
chr12	85625828	85626027
chr12	85762570	85762734
chr12	85784417	85784633
chr12	85959143	85959295
chr12	86002253	86002442
chr12	86005269	86005454
chr12	86057808	86057960
chr12	86154788	86155108
chr12	86158602	86158767
chr12	86232124	86232343
chr12	86327978	86328353
chr12	86369720	86369916
chr12	86409605	86409826
chr12	86415886	86416101
chr12	86430037	86430264
chr12	86611485	86611637
chr12	86612437	86612590
chr12	86615569	86615721
chr12	86994091	86994281
chr12	87191769	87191985
chr12	87417313	87417553
chr12	87736021	87736176
chr12	87825355	87825543
chr12	88135945	88136098
chr12	88139139	88139291
chr12	88145042	88145226
chr12	88269470	88269665
chr12	88295826	88296011
chr12	88305570	88305791
chr12	88367224	88367376
chr12	88567811	88567995
chr12	88611348	88611500
chr12	88617116	88617312
chr12	88751652	88751903
chr12	88798692	88798844
chr12	88966865	88967094
chr12	89062065	89062311
chr12	90208627	90208820
chr12	90569938	90570113
chr12	91669607	91669765
chr12	91681382	91681611
chr12	92220546	92220765
chr12	92653626	92653866
chr12	92782958	92783113
chr12	92813815	92813981
chr12	92883546	92883701
chr12	93244689	93244911
chr12	94936366	94936582
chr12	95334382	95334534
chr12	98937326	98937486
chr12	99854440	99854629
chr12	99995912	99996139
chr12	100093603	100093804
chr12	100417708	100417873
chr12	101140314	101140528
chr12	101229405	101229566
chr12	101722811	101722964
chr12	101741203	101741355
chr12	101840860	101841034
chr12	101901711	101901918
chr12	101994648	101994800
chr12	102315248	102315421
chr12	102318167	102318341
chr12	102839872	102840033
chr12	103227490	103227696
chr12	103742000	103742152
chr12	103872700	103872923
chr12	103946684	103946853
chr12	104008222	104008430
chr12	104030751	104030903
chr12	104591888	104592132
chr12	104665002	104665218
chr12	104726729	104726919
chr12	104800661	104800905
chr12	105691352	105691529
chr12	105894530	105894761
chr12	106064139	106064321
chr12	106068123	106068357
chr12	106177171	106177411
chr12	106264425	106264599
chr12	106399477	106399639
chr12	106813144	106813300
chr12	106946989	106947202
chr12	106968706	106968932
chr12	107007149	107007316
chr12	107007876	107008092
chr12	107040370	107040550
chr12	107067706	107067886
chr12	107364040	107364225
chr12	107425302	107425506
chr12	108969410	108969593
chr12	109316427	109316583
chr12	109526024	109526304
chr12	109940603	109940781
chr12	109993796	109993955
chr12	109994962	109995190
chr12	109998764	109998984
chr12	110030510	110030669
chr12	110042187	110042381
chr12	110218304	110218523
chr12	110234517	110234731
chr12	110804946	110805121
chr12	111164887	111165126
chr12	111392907	111393158
chr12	111888710	111888886
chr12	111909881	111910105
chr12	111945002	111945164
chr12	111971752	111971935
chr12	111972177	111972329
chr12	112060085	112060243
chr12	112080350	112080505
chr12	112162571	112162746
chr12	112215296	112215510
chr12	112318776	112319039
chr12	112366004	112366228
chr12	112417064	112417287
chr12	112489584	112489777
chr12	112516348	112516654
chr12	112572955	112573170
chr12	112816914	112817142
chr12	112834120	112834272
chr12	112881758	112881986
chr12	113278902	113279064
chr12	113626116	113626370
chr12	113693185	113693364
chr12	113753172	113753421
chr12	113947977	113948147
chr12	114087596	114087839
chr12	114290378	114290551
chr12	114300632	114300823
chr12	114891356	114891546
chr12	114899873	114900065
chr12	115301596	115301787
chr12	115373178	115373330
chr12	115529397	115529593
chr12	115560417	115560573
chr12	115949439	115949637
chr12	116120666	116120884
chr12	116246736	116246888
chr12	116574943	116575111
chr12	116598452	116598606
chr12	116737159	116737382
chr12	117076028	117076187
chr12	117377394	117377578
chr12	117519630	117519862
chr12	117632881	117633110
chr12	117822339	117822568
chr12	118452203	118452377
chr12	118746369	118746531
chr12	118761848	118762015
chr12	118994625	118994812
chr12	119825335	119825549
chr12	120087440	120087592
chr12	120591217	120591399
chr12	121046240	121046408
chr13	3280612	3280818
chr13	3405115	3405318
chr13	3405471	3405640
chr13	3590131	3590320
chr13	3596439	3596603
chr13	3666800	3667074
chr13	3757090	3757247
chr13	4709914	4710089
chr13	4770770	4770957
chr13	4856877	4857054
chr13	4930397	4930567
chr13	6272302	6272454
chr13	6531491	6531674
chr13	8752299	8752494
chr13	8824659	8824858
chr13	9458970	9459139
chr13	9867227	9867406
chr13	10070517	10070669
chr13	10460510	10460662
chr13	10914473	10914675
chr13	11300894	11301063
chr13	12018158	12018384
chr13	12104631	12104830
chr13	12160913	12161163
chr13	12198459	12198627
chr13	12354839	12355042
chr13	12612599	12612805
chr13	12819356	12819510
chr13	13440061	13440237
chr13	13682897	13683059
chr13	13754474	13754661
chr13	13920538	13920690
chr13	14043207	14043424
chr13	14096930	14097181
chr13	14546374	14546545
chr13	15167401	15167625
chr13	17877482	17877681
chr13	18041431	18041673
chr13	18730884	18731067
chr13	18849916	18850147
chr13	18885757	18885948
chr13	19037149	19037310
chr13	20275874	20276052
chr13	20723462	20723665
chr13	20902380	20902563
chr13	21249947	21250128
chr13	21392970	21393125
chr13	21978452	21978644
chr13	22087421	22087625
chr13	22107870	22108056
chr13	22817833	22817998
chr13	23324248	23324400
chr13	23398845	23399071
chr13	23538324	23538499
chr13	24384012	24384212
chr13	24398144	24398420
chr13	24630025	24630177
chr13	24813721	24814064
chr13	24832288	24832444
chr13	25118942	25119149
chr13	25425772	25425997
chr13	25641680	25641832
chr13	27006657	27006846
chr13	29915910	29916103
chr13	30285454	30285625
chr13	30903484	30903636
chr13	32700359	32700555
chr13	32729330	32729495
chr13	33348736	33348939
chr13	33803655	33803895
chr13	34052285	34052437
chr13	34143800	34143952
chr13	34223626	34223839
chr13	34354313	34354466
chr13	34819038	34819251
chr13	34832490	34832683
chr13	35123680	35123832
chr13	36451344	36451522
chr13	36762589	36762743
chr13	38022057	38022272
chr13	38117431	38117651
chr13	38123001	38123168
chr13	38125335	38125523
chr13	38175715	38175867
chr13	38213916	38214076
chr13	38253985	38254185
chr13	38278326	38278478
chr13	38298308	38298569
chr13	38312299	38312451
chr13	38376266	38376455
chr13	39087699	39087950
chr13	39953854	39954065
chr13	40132317	40132473
chr13	40562623	40562775
chr13	40700560	40700726
chr13	40866050	40866227
chr13	41074889	41075048
chr13	41189924	41190076
chr13	41746036	41746322
chr13	41949620	41949855
[truncated: 6,835 more rows]
