# Supplementary material for: YY1 and CTCF orchestrate a 3D chromatin looping switch during early neural lineage commitment
Source: HighWire-hosted journal article supplement (doi:10.1101/gr.215160.116), 2017-05-23
Supplement: Supplemental_Table_S9.xlsx [file Supplemental_Table_S9.xlsx]

## Sheet: NPConly_E-8_E-8_Galaxy490-(Subt
Beagan et al. 2017
Table S9, Significant CTCF Peaks present only in the NPC condition (classified as 'NPC only')
#chr	start	end
chr1	19963559	19963726
chr1	22633881	22634019
chr1	23927189	23927314
chr1	24041017	24041174
chr1	25885872	25886052
chr1	33704167	33704307
chr1	34720938	34721147
chr1	34782922	34783097
chr1	35936264	35936397
chr1	38447813	38447936
chr1	41327910	41328135
chr1	43200230	43200372
chr1	45558357	45558482
chr1	52873864	52874013
chr1	59930920	59931104
chr1	64349438	64349565
chr1	69378078	69378231
chr1	71316823	71317002
chr1	73762309	73762432
chr1	77510184	77510309
chr1	78212303	78212454
chr1	78722533	78722724
chr1	79636839	79637059
chr1	79995752	79995948
chr1	88567063	88567196
chr1	91564115	91564249
chr1	92142225	92142413
chr1	93875153	93875338
chr1	99873512	99873768
chr1	120232544	120232679
chr1	128381344	128381467
chr1	128914339	128914536
chr1	134006126	134006270
chr1	135060892	135061022
chr1	135858355	135858566
chr1	135957930	135958056
chr1	136500815	136500938
chr1	137064170	137064338
chr1	138064358	138064527
chr1	139228639	139228789
chr1	140026834	140026988
chr1	142445387	142445574
chr1	146200597	146200748
chr1	146278691	146278916
chr1	146551650	146551773
chr1	154885062	154885187
chr1	157062630	157062774
chr1	160077815	160077941
chr1	163532459	163532582
chr1	164206315	164206466
chr1	167006018	167006193
chr1	169213955	169214079
chr1	170689126	170689266
chr1	173644253	173644474
chr1	176848525	176848648
chr1	177533559	177533783
chr1	177601868	177602019
chr1	178929323	178929460
chr1	179350424	179350588
chr1	182259152	182259300
chr1	185857671	185857862
chr1	186202649	186202798
chr1	187920906	187921033
chr1	188478923	188479154
chr1	190271966	190272131
chr1	192585776	192585917
chr1	192692847	192692998
chr1	194952190	194952334
chr1	195152941	195153064
chr1	196777262	196777449
chr10	6939983	6940129
chr10	8111117	8111319
chr10	8238859	8239036
chr10	9394417	9394548
chr10	9533774	9534013
chr10	10896031	10896155
chr10	14052626	14052799
chr10	14894322	14894445
chr10	19631494	19631633
chr10	31224192	31224364
chr10	36493712	36493865
chr10	40690849	40691062
chr10	42726496	42726640
chr10	49239677	49239863
chr10	49508547	49508670
chr10	51377246	51377398
chr10	58063639	58063827
chr10	58368116	58368306
chr10	60294153	60294364
chr10	62487381	62487535
chr10	67745326	67745449
chr10	69117045	69117201
chr10	74713902	74714032
chr10	75166918	75167093
chr10	76802924	76803060
chr10	76820841	76820964
chr10	77488338	77488519
chr10	77785676	77785845
chr10	78010577	78010700
chr10	78206596	78206724
chr10	82562596	82562719
chr10	83111237	83111418
chr10	83115317	83115441
chr10	83123472	83123637
chr10	84104401	84104620
chr10	86520352	86520543
chr10	86965147	86965355
chr10	87153700	87153846
chr10	89300390	89300517
chr10	90707190	90707373
chr10	90962805	90962962
chr10	91008937	91009127
chr10	93673577	93673705
chr10	93891388	93891522
chr10	93978017	93978223
chr10	95645022	95645145
chr10	98629118	98629249
chr10	100067005	100067157
chr10	100274426	100274585
chr10	103447059	103447191
chr10	109557721	109557916
chr10	110736744	110736878
chr10	110943477	110943664
chr10	112232721	112232882
chr10	119914244	119914384
chr10	121620164	121620362
chr10	121962995	121963133
chr10	123846709	123846872
chr10	125222025	125222210
chr10	126516821	126516987
chr10	126518362	126518485
chr10	126791042	126791189
chr11	3763700	3763863
chr11	4166657	4166825
chr11	5462968	5463177
chr11	5926486	5926672
chr11	6577623	6577761
chr11	18777570	18777706
chr11	20377135	20377339
chr11	20790610	20790762
chr11	20816115	20816346
chr11	22106727	22106927
chr11	23965338	23965581
chr11	28241965	28242088
chr11	31613709	31613859
chr11	31900231	31900510
chr11	32006433	32006595
chr11	32234207	32234372
chr11	35808980	35809103
chr11	36506238	36506394
chr11	40517767	40517890
chr11	44647034	44647161
chr11	44987165	44987288
chr11	50050114	50050271
chr11	50437887	50438050
chr11	51056426	51056728
chr11	51856911	51857034
chr11	51877962	51878199
chr11	60164875	60164998
chr11	64569215	64569347
chr11	65719121	65719273
chr11	66339587	66339714
chr11	71159591	71159722
chr11	72565537	72565708
chr11	74677102	74677253
chr11	74945793	74946016
chr11	75841287	75841452
chr11	77597312	77597467
chr11	78029908	78030092
chr11	79605737	79605897
chr11	80115280	80115406
chr11	80287673	80287961
chr11	80591359	80591484
chr11	82069161	82069328
chr11	85808936	85809137
chr11	85880771	85880937
chr11	87787534	87787697
chr11	94281793	94281938
chr11	98828100	98828256
chr11	101414171	101414322
chr11	101947826	101947949
chr11	102466495	102466645
chr11	102518014	102518137
chr11	103260499	103260675
chr11	107589889	107590059
chr11	107934249	107934398
chr11	109972606	109972793
chr11	115094880	115095051
chr11	117751909	117752103
chr11	117851339	117851482
chr11	118736705	118736856
chr11	118987930	118988102
chr11	119642609	119642793
chr11	120004228	120004351
chr11	120925689	120925817
chr11	121098973	121099096
chr11	121519595	121519755
chr12	3835066	3835286
chr12	3928955	3929165
chr12	15518957	15519113
chr12	16664132	16664396
chr12	26548413	26548536
chr12	29458756	29458951
chr12	29516344	29516528
chr12	29851261	29851464
chr12	30480266	30480466
chr12	35136116	35136308
chr12	35215001	35215146
chr12	40220567	40220716
chr12	40457912	40458055
chr12	46567084	46567317
chr12	49747037	49747206
chr12	51798630	51798782
chr12	54245748	54245871
chr12	56179845	56179972
chr12	56986506	56986743
chr12	66494682	66494828
chr12	74425907	74426069
chr12	74809967	74810203
chr12	75125999	75126164
chr12	78102114	78102248
chr12	78121283	78121451
chr12	81027272	81027395
chr12	81563425	81563558
chr12	81599435	81599592
chr12	82093624	82093769
chr12	83272680	83272803
chr12	84115952	84116117
chr12	84314841	84315020
chr12	84531679	84531843
chr12	84583905	84584079
chr12	85070473	85070603
chr12	86153040	86153201
chr12	88021873	88021996
chr12	96933837	96933977
chr12	97375143	97375283
chr12	101576023	101576225
chr12	101576344	101576614
chr12	103367213	103367350
chr12	103736295	103736418
chr12	106010249	106010411
chr12	106670167	106670464
chr12	109603646	109603771
chr12	112044624	112044747
chr12	113339324	113339447
chr12	118081424	118081547
chr12	118280042	118280170
chr12	120510523	120510672
chr13	25279381	25279556
chr13	25819434	25819681
chr13	31299635	31299844
chr13	32889161	32889299
chr13	34284588	34284725
chr13	34697231	34697384
chr13	37136936	37137075
chr13	38688975	38689184
chr13	39072926	39073055
chr13	42237110	42237302
chr13	43291345	43291508
chr13	43845746	43845930
chr13	48821907	48822034
chr13	49060940	49061073
chr13	51303848	51303990
chr13	54469250	54469425
chr13	54472766	54472983
chr13	56717380	56717542
chr13	59390613	59390781
chr13	64030754	64030892
chr13	64091790	64091946
chr13	64410485	64410614
chr13	70980572	70980701
chr13	76159432	76159561
chr13	77354873	77355009
chr13	79424871	79425089
chr13	84752878	84753042
chr13	91178817	91179033
chr13	91602803	91602943
chr13	92055622	92055826
chr13	94563394	94563582
chr13	94913360	94913523
chr13	97777993	97778116
chr13	97968105	97968259
chr13	98976359	98976571
chr13	99947007	99947168
chr13	101838526	101838663
chr13	102538351	102538474
chr13	103303823	103303988
chr13	104839067	104839305
chr13	111109027	111109250
chr14	8399924	8400050
chr14	19304068	19304197
chr14	20404573	20404703
chr14	22493853	22493993
chr14	25465543	25465756
chr14	25469665	25469788
chr14	25759496	25759670
chr14	25939595	25939743
chr14	25943734	25943875
chr14	26192158	26192316
chr14	26559741	26559895
chr14	26565381	26565515
chr14	28817342	28817494
chr14	29763092	29763258
chr14	29771395	29771540
chr14	29887087	29887225
chr14	31508999	31509145
chr14	32030960	32031085
chr14	34346837	34346986
chr14	35906965	35907092
chr14	37592242	37592437
chr14	47502118	47502290
chr14	49158224	49158396
chr14	52945637	52945816
chr14	54596548	54596765
chr14	55257171	55257335
chr14	55842183	55842366
chr14	61009372	61009519
chr14	61158030	61158183
chr14	61966218	61966401
chr14	63226686	63226883
chr14	65950821	65950946
chr14	66809307	66809513
chr14	67498569	67498713
chr14	67891170	67891339
chr14	67990109	67990321
chr14	69308355	69308626
chr14	70000951	70001074
chr14	72427619	72427747
chr14	72583824	72583963
chr14	75775136	75775365
chr14	79124828	79125076
chr14	80612840	80613025
chr14	86297818	86297993
chr14	86462660	86462825
chr14	93780471	93780693
chr14	96176805	96176935
chr14	97958928	97959051
chr14	97986267	97986445
chr14	99351004	99351131
chr14	100343991	100344142
chr14	100857492	100857688
chr14	102005172	102005311
chr14	103380966	103381217
chr14	105707032	105707160
chr14	109335129	109335252
chr14	111154377	111154571
chr14	111982411	111982546
chr14	115380518	115380652
chr14	121163686	121163869
chr15	8835180	8835321
chr15	10369833	10369956
chr15	18329573	18329696
chr15	25029327	25029450
chr15	25684168	25684291
chr15	26825137	26825373
chr15	28432664	28432787
chr15	35619574	35619698
chr15	42039089	42039230
chr15	44390989	44391120
chr15	45011833	45011956
chr15	53174867	53175025
chr15	53899341	53899502
chr15	58986047	58986204
chr15	59123120	59123337
chr15	60928092	60928301
chr15	62041506	62041629
chr15	63172094	63172316
chr15	63943032	63943228
chr15	65424653	65424885
chr15	65675288	65675414
chr15	66229239	66229405
chr15	66293601	66293725
chr15	66561645	66561793
chr15	68075785	68075921
chr15	68260604	68260737
chr15	69157072	69157244
chr15	69406084	69406275
chr15	69752758	69752903
chr15	71779042	71779173
chr15	71827363	71827506
chr15	72445145	72445290
chr15	72461205	72461380
chr15	72639515	72639647
chr15	73217658	73217815
chr15	76325088	76325225
chr15	78804519	78804667
chr15	79208158	79208329
chr15	80316175	80316324
chr15	81069762	81069939
chr15	81564959	81565082
chr15	82086616	82086753
chr15	82737066	82737206
chr15	84593972	84594111
chr15	87374414	87374607
chr15	88764683	88764861
chr15	92417885	92418037
chr15	92429132	92429337
chr15	93530595	93530718
chr15	93808132	93808266
chr15	95102712	95102835
chr15	102423216	102423385
chr15	102908185	102908328
chr15	102951994	102952153
chr15	103102903	103103026
chr16	4213327	4213514
chr16	5898545	5898724
chr16	8333571	8333730
chr16	8829391	8829571
chr16	10395912	10396054
chr16	11031550	11031699
chr16	11455703	11455842
chr16	18518338	18518467
chr16	18580634	18580793
chr16	21109684	21109807
chr16	21836850	21837021
chr16	22429178	22429420
chr16	22440431	22440605
chr16	23225973	23226116
chr16	24282489	24282800
chr16	25952208	25952372
chr16	26023517	26023669
chr16	30587951	30588103
chr16	34094529	34094665
chr16	36724045	36724241
chr16	37347253	37347464
chr16	38033261	38033426
chr16	39363859	39364049
chr16	39471784	39471947
chr16	40639878	40640032
chr16	41524476	41524684
chr16	43510736	43510933
chr16	44762051	44762197
chr16	50217306	50217429
chr16	50242698	50242842
chr16	50321606	50321786
chr16	52450389	52450618
chr16	66495888	66496011
chr16	70160893	70161117
chr16	70868581	70868796
chr16	73219550	73219673
chr16	78627203	78627326
chr16	78950726	78950915
chr16	85722342	85722489
chr16	89943976	89944110
chr16	92289114	92289264
chr16	92828312	92828503
chr16	94694162	94694311
chr16	94731708	94732008
chr16	95807324	95807449
chr16	96975144	96975277
chr17	5187638	5187780
chr17	8939276	8939408
chr17	9632947	9633160
chr17	9772331	9772547
chr17	12454912	12455037
chr17	12511939	12512062
chr17	14481094	14481217
chr17	15556519	15556716
chr17	25732569	25732706
chr17	25769156	25769331
chr17	27493933	27494126
chr17	35093363	35093543
chr17	36521870	36522005
chr17	37185017	37185193
chr17	46761139	46761292
chr17	47061225	47061348
chr17	47896767	47896936
chr17	48577094	48577220
chr17	56677407	56677626
chr17	56945357	56945557
chr17	66546492	66546631
chr17	71316684	71316897
chr17	72315152	72315388
chr17	73266596	73266745
chr17	73267213	73267337
chr17	74721775	74721985
chr17	78435118	78435252
chr17	78697654	78697795
chr17	79967872	79968051
chr17	81274779	81274955
chr17	81416661	81416802
chr17	84458563	84458739
chr17	87846589	87846712
chr17	87860967	87861105
chr17	88466986	88467109
chr17	93596266	93596406
chr18	4177021	4177172
chr18	4746189	4746337
chr18	5134055	5134195
chr18	16547768	16547928
chr18	20096341	20096509
chr18	23199806	23199930
chr18	23251571	23251778
chr18	25798582	25798705
chr18	32578446	32578642
chr18	33101050	33101178
chr18	33419114	33419285
chr18	34266950	34267148
chr18	38654488	38654666
chr18	43918232	43918378
chr18	46121221	46121344
chr18	46723327	46723476
chr18	47526003	47526158
chr18	56492762	56492974
chr18	58652519	58652702
chr18	59498985	59499155
chr18	61485665	61485788
chr18	65122209	65122365
chr18	68381298	68381421
chr18	72188779	72188981
chr18	72507444	72507593
chr18	72510857	72510993
chr18	75979258	75979410
chr18	77289593	77289739
chr18	80808002	80808208
chr18	81386961	81387090
chr18	83037289	83037448
chr18	83243683	83243837
chr19	7143774	7143955
chr19	12871747	12871899
chr19	18947799	18948017
chr19	22213390	22213625
chr19	22375525	22375663
chr19	23521674	23521797
chr19	24777782	24777921
chr19	26889218	26889356
chr19	27047707	27047876
chr19	27501090	27501226
chr19	32397075	32397208
chr19	36814201	36814324
chr19	38975795	38975942
chr19	41771991	41772122
chr19	44726201	44726345
chr19	46323563	46323730
chr19	50985312	50985452
chr19	54121369	54121505
chr19	56504955	56505112
chr19	59454573	59454753
chr19	60508409	60508532
chr19	60589449	60589656
chr2	3733317	3733578
chr2	8458673	8458826
chr2	12932448	12932600
chr2	17248320	17248511
chr2	17762828	17762951
chr2	18274365	18274526
chr2	19196354	19196507
chr2	20893395	20893536
chr2	21136116	21136244
chr2	24630488	24630621
chr2	24954565	24954783
chr2	25422225	25422379
chr2	25721128	25721327
chr2	27555029	27555268
chr2	27741363	27741496
chr2	28350824	28350968
chr2	29955867	29956003
chr2	30469178	30469394
chr2	35464973	35465108
chr2	49303485	49303621
chr2	49586466	49586614
chr2	51608550	51608707
chr2	53427114	53427241
chr2	53952480	53952615
chr2	57227214	57227387
chr2	58682814	58682948
chr2	60019892	60020015
chr2	60446149	60446291
chr2	63290383	63290567
chr2	66022604	66022784
chr2	68306890	68307030
chr2	70662541	70662740
chr2	71289960	71290091
chr2	71860022	71860210
chr2	73583807	73584057
chr2	75940361	75940573
chr2	76919312	76919447
chr2	84026423	84026585
chr2	90345161	90345287
chr2	92957460	92957610
chr2	96123194	96123397
chr2	101437419	101437732
chr2	101823229	101823383
chr2	101873283	101873410
chr2	101879030	101879158
chr2	102822155	102822327
chr2	104174174	104174311
chr2	106523092	106523215
chr2	110790421	110790552
chr2	112663045	112663175
chr2	113057500	113057623
chr2	114275822	114275945
chr2	115931080	115931237
chr2	116946094	116946243
chr2	116998812	116998992
chr2	117280859	117281014
chr2	118587154	118587324
chr2	118605463	118605607
chr2	119656416	119656581
chr2	120496126	120496332
chr2	120803151	120803305
chr2	122652115	122652248
chr2	122742595	122742800
chr2	123925513	123925659
chr2	124431152	124431305
chr2	125590882	125591031
chr2	126267952	126268086
chr2	127172224	127172347
chr2	129485935	129486172
chr2	130354312	130354445
chr2	130644507	130644829
chr2	130665348	130665482
chr2	132073293	132073479
chr2	136740148	136740348
chr2	140326766	140326944
chr2	144464566	144464730
chr2	146613299	146613432
chr2	152298276	152298408
chr2	153342759	153342916
chr2	157285563	157285751
chr2	159412558	159412681
chr2	162692154	162692283
chr2	163681180	163681380
chr2	165429447	165429579
chr2	166431705	166431842
chr2	167420079	167420209
chr2	167692345	167692508
chr2	168038680	168038838
chr2	180767193	180767341
chr2	180954309	180954494
chr3	4756188	4756329
chr3	15090282	15090428
chr3	22962227	22962381
chr3	26215677	26215838
chr3	26899741	26899864
chr3	30145587	30145748
chr3	30347711	30347876
chr3	31008173	31008346
chr3	32809245	32809402
chr3	32956778	32956917
chr3	33690067	33690205
chr3	33752082	33752283
chr3	34186876	34187082
chr3	37371507	37371660
chr3	37851939	37852137
chr3	37944515	37944733
chr3	38042268	38042453
chr3	38759776	38759942
chr3	38784930	38785096
chr3	39119770	39119913
chr3	40430406	40430595
chr3	41743756	41744032
chr3	45187838	45187989
chr3	49559880	49560037
chr3	50497900	50498023
chr3	51455166	51455300
chr3	51543032	51543197
chr3	52846012	52846173
chr3	54829557	54829682
chr3	55270407	55270538
chr3	55346428	55346578
chr3	60298959	60299102
chr3	60524384	60524529
chr3	60569073	60569249
chr3	64110846	64110969
chr3	64791687	64791839
chr3	66066345	66066583
chr3	67319489	67319616
chr3	67368750	67368965
chr3	68450392	68450544
chr3	78385995	78386121
chr3	80176468	80176643
chr3	81287425	81287551
chr3	82154333	82154532
chr3	82211439	82211603
chr3	82352823	82353031
chr3	87806620	87806987
chr3	90094653	90094776
chr3	95797833	95798017
chr3	97644440	97644629
chr3	97824356	97824480
chr3	98185674	98185891
chr3	101118975	101119117
chr3	105445185	105445405
chr3	105698319	105698536
chr3	106899510	106899638
chr3	108661343	108661466
chr3	109909037	109909194
chr3	110669080	110669208
chr3	116125677	116125870
chr3	116855978	116856115
chr3	122165334	122165500
chr3	127567241	127567369
chr3	131249840	131250027
chr3	134273326	134273509
chr3	134317154	134317294
chr3	136105238	136105377
chr3	136809124	136809249
chr3	137806858	137806983
chr3	142903812	142903992
chr3	142954902	142955053
chr3	144194040	144194164
chr3	146145181	146145310
chr3	146446676	146446936
chr3	156435155	156435316
chr3	158945720	158945877
chr4	4802470	4802651
chr4	5132613	5132759
chr4	5725406	5725558
chr4	6828921	6829062
chr4	13670253	13670396
chr4	15100932	15101062
chr4	19623989	19624167
chr4	24641602	24641737
chr4	24834980	24835153
chr4	32326850	32327016
chr4	34908144	34908324
chr4	41565819	41565959
chr4	44538344	44538488
chr4	46871878	46872090
chr4	47049478	47049621
chr4	47590471	47590665
chr4	48347917	48348086
chr4	49264244	49264435
chr4	53043498	53043718
chr4	55539379	55539535
chr4	63444438	63444573
chr4	64194130	64194352
chr4	73870227	73870350
chr4	76093405	76093623
chr4	81018940	81019102
chr4	84522358	84522620
chr4	87529263	87529425
chr4	87547196	87547396
chr4	93927950	93928127
chr4	96258514	96258663
chr4	96386042	96386258
chr4	96541433	96541572
chr4	97766209	97766378
chr4	98156222	98156345
chr4	102153820	102154014
chr4	102157502	102157709
chr4	103364459	103364632
chr4	105900195	105900339
chr4	114114923	114115075
chr4	116180336	116180459
chr4	122674472	122674607
chr4	124240031	124240162
chr4	124340390	124340579
chr4	125788887	125789061
chr4	128963954	128964130
chr4	130424896	130425021
chr4	132896357	132896491
chr4	136240528	136240655
chr4	138610606	138610805
chr4	139434459	139434656
chr4	140378010	140378198
chr4	148435249	148435407
chr4	148723189	148723353
chr4	149600660	149600823
chr4	150082704	150082827
chr4	151228162	151228315
chr4	154013410	154013568
chr4	155050243	155050424
chr5	4263877	4264056
chr5	4817105	4817228
chr5	23607443	23607571
chr5	23843306	23843463
chr5	24142917	24143088
chr5	24549963	24550101
chr5	24671117	24671266
chr5	29597484	29597688
chr5	30339700	30339863
chr5	30557529	30557751
chr5	33333884	33334018
chr5	33590180	33590303
chr5	34979528	34979663
chr5	36236639	36236802
chr5	36483855	36484047
chr5	38868533	38868656
chr5	42280028	42280296
chr5	42338576	42338783
chr5	42362594	42362733
chr5	43627851	43628005
chr5	44874810	44874933
chr5	46247263	46247401
chr5	54315336	54315487
chr5	54583046	54583197
chr5	55684665	55684798
chr5	63098202	63098401
chr5	68504090	68504279
chr5	71483825	71483970
chr5	71485240	71485364
chr5	71487235	71487358
chr5	71487505	71487628
chr5	81450688	81450825
chr5	82772108	82772236
chr5	86201227	86201400
chr5	86201797	86201945
chr5	89358358	89358514
chr5	90268750	90268938
chr5	90326684	90326807
chr5	90822895	90823077
chr5	107361786	107361929
chr5	107395564	107395705
chr5	111352463	111352703
chr5	113006106	113006313
chr5	114820653	114820778
chr5	118527143	118527311
chr5	120624435	120624558
chr5	122135817	122136011
chr5	122712746	122712883
chr5	123958142	123958301
chr5	124270797	124270938
chr5	124792087	124792247
chr5	125558742	125558868
chr5	129922396	129922550
chr5	132589507	132589657
chr5	132591576	132591797
chr5	135965024	135965147
chr5	137906407	137906540
chr5	139464830	139464963
chr5	139944051	139944261
chr5	139986739	139986914
chr5	140680046	140680365
chr5	140832373	140832496
chr5	141146327	141146480
chr5	147946081	147946284
chr5	149860698	149860858
chr5	150097726	150097884
chr5	150316951	150317134
chr5	151354371	151354518
chr6	4367209	4367386
chr6	8644707	8644910
chr6	11545003	11545204
chr6	12300762	12300941
chr6	14846953	14847207
chr6	16100642	16100851
chr6	16266674	16266822
chr6	17060681	17060841
chr6	18857317	18857442
chr6	22934397	22934568
chr6	24977073	24977271
chr6	28084595	28084718
chr6	28471019	28471174
chr6	30031451	30031577
chr6	30897036	30897218
chr6	31362651	31362777
chr6	36808200	36808371
chr6	36988599	36988770
chr6	43345701	43345824
chr6	48543585	48543724
chr6	49158377	49158548
chr6	49473266	49473389
chr6	49666544	49666678
chr6	49880146	49880322
chr6	50781846	50781987
chr6	53240248	53240393
chr6	55346312	55346484
chr6	58826184	58826353
chr6	58831452	58831635
chr6	60881622	60881783
chr6	60913824	60913950
chr6	72171431	72171576
chr6	72460796	72460928
chr6	77192565	77192727
chr6	77207759	77208020
chr6	79968819	79968946
chr6	83566598	83566765
chr6	85715732	85715916
chr6	86604469	86604601
chr6	87231884	87232044
chr6	87612155	87612369
chr6	88436957	88437166
chr6	88765227	88765369
chr6	89289512	89289652
chr6	89417058	89417207
chr6	90511278	90511438
chr6	90770032	90770192
chr6	92658250	92658386
chr6	92921187	92921310
chr6	95468533	95468666
chr6	96067087	96067221
chr6	100077426	100077594
chr6	100113103	100113278
chr6	100610521	100610685
chr6	101423567	101423690
chr6	101871095	101871374
chr6	104864962	104865087
chr6	112692403	112692603
chr6	113415764	113415889
chr6	114026672	114026889
chr6	114247802	114247987
chr6	114342799	114342933
chr6	114633799	114633938
chr6	114648803	114648953
chr6	128612434	128612557
chr6	129038234	129038451
chr6	137194583	137194711
chr6	137314270	137314408
chr6	141119678	141119805
chr6	141323796	141323954
chr6	142425866	142426022
chr6	144912855	144912982
chr6	145320664	145320815
chr6	146450837	146450970
chr6	147093997	147094144
chr6	148889034	148889178
chr7	6681894	6682037
chr7	29004388	29004543
chr7	29685129	29685275
chr7	31074868	31075018
chr7	36435844	36436013
chr7	51701552	51701688
chr7	53765568	53765691
chr7	66022673	66022910
chr7	66368879	66369012
chr7	68914839	68915008
chr7	69023626	69023757
chr7	70996904	70997041
chr7	71327618	71327771
chr7	71843087	71843337
chr7	72358523	72358675
chr7	73080177	73080370
chr7	75324700	75324837
chr7	76955852	76955975
chr7	80547080	80547210
chr7	80564516	80564639
chr7	81569473	81569652
chr7	81699055	81699210
chr7	82067342	82067490
chr7	82713859	82714034
chr7	84586664	84586787
chr7	85190464	85190598
chr7	86454387	86454510
chr7	86677074	86677219
chr7	89825447	89825585
chr7	90587652	90587789
chr7	91262113	91262250
chr7	94734792	94735017
chr7	96666671	96666906
chr7	99976666	99976873
chr7	104595838	104595987
chr7	107540945	107541096
chr7	107967319	107967483
chr7	109009336	109009459
chr7	116115511	116115653
chr7	117117220	117117398
chr7	119356478	119356601
chr7	121642945	121643072
chr7	122017637	122017875
chr7	124464213	124464370
chr7	125444581	125444722
chr7	125508335	125508519
chr7	126041677	126041846
chr7	136389531	136389657
chr7	136898399	136898530
chr7	140315954	140316121
chr7	143587752	143587959
chr7	144446038	144446185
chr7	146490352	146490482
chr7	149766130	149766289
chr7	149766612	149766780
chr7	149767681	149768054
chr7	151775530	151775679
chr7	152384566	152384704
chr7	152485167	152485306
chr8	12755381	12755560
chr8	13673283	13673407
chr8	14992795	14992973
chr8	15923388	15923525
chr8	17664407	17664607
chr8	26726344	26726467
chr8	32570888	32571102
chr8	35956110	35956300
chr8	40122065	40122226
chr8	41508945	41509117
chr8	46020178	46020352
chr8	48021585	48021745
chr8	56041379	56041514
chr8	60925788	60925962
chr8	63703379	63703510
chr8	63853285	63853479
chr8	67240302	67240425
chr8	72971533	72971671
chr8	77171876	77171999
chr8	77744218	77744350
chr8	79866255	79866411
chr8	83402720	83402905
chr8	85148627	85148784
chr8	89105789	89106007
chr8	89332192	89332365
chr8	94150174	94150372
chr8	97504984	97505107
chr8	97954093	97954272
chr8	105039755	105039941
chr8	110479882	110480017
chr8	111771820	111771994
chr8	113143922	113144103
chr8	114336867	114336998
chr8	114793639	114793762
chr8	120686113	120686248
chr8	123088641	123088777
chr8	124748630	124748820
chr8	125199016	125199170
chr8	125389430	125389553
chr8	125779207	125779330
chr8	128780633	128780759
chr8	129363812	129363961
chr8	129792670	129792845
chr9	4210197	4210361
chr9	8676765	8676908
chr9	9694030	9694153
chr9	15724129	15724338
chr9	16305262	16305442
chr9	16306500	16306697
chr9	20972790	20972973
chr9	23334585	23334723
chr9	28145573	28145723
chr9	28745633	28745813
chr9	29481626	29481794
chr9	29610623	29610796
chr9	32474871	32474994
chr9	32888435	32888593
chr9	34838516	34838648
chr9	36921973	36922131
chr9	36932918	36933083
chr9	40000173	40000297
chr9	40615810	40615972
chr9	44143167	44143306
chr9	44306678	44306831
chr9	45548815	45548960
chr9	47339524	47339767
chr9	51976905	51977083
chr9	54408127	54408250
chr9	55316344	55316467
chr9	56112562	56112721
chr9	56481726	56481894
chr9	56587259	56587387
chr9	56741945	56742110
chr9	60099686	60099846
chr9	60410943	60411066
chr9	61401480	61401653
chr9	61543175	61543340
chr9	62077648	62077772
chr9	65265671	65265800
chr9	68091415	68091538
chr9	70519892	70520053
chr9	73990604	73990791
chr9	75446972	75447159
chr9	78349082	78349285
chr9	78477964	78478089
chr9	78957460	78957666
chr9	79627237	79627445
chr9	88371091	88371216
chr9	89121019	89121158
chr9	89871465	89871588
chr9	90057493	90057683
chr9	94435311	94435472
chr9	100543207	100543419
chr9	101909039	101909240
chr9	102010355	102010543
chr9	102351783	102351906
chr9	103416270	103416397
chr9	106251501	106251645
chr9	106371716	106371843
chr9	110618036	110618193
chr9	110684452	110684579
chr9	115219442	115219565
chr9	115833328	115833467
chr9	116969726	116969871
chr9	118076827	118076950
chr9	118519300	118519426
chr9	118960422	118960560
chr9	120643446	120643569
chr9	123366911	123367043
chrX	6499391	6499541
chrX	9810274	9810397
chrX	10678181	10678304
chrX	20381538	20381732
chrX	23085081	23085215
chrX	23730518	23730641
chrX	39371406	39371533
chrX	39688094	39688217
chrX	46172164	46172290
chrX	46699722	46699906
chrX	50378784	50378907
chrX	51595271	51595394
chrX	56432280	56432443
chrX	62968967	62969090
chrX	63692194	63692317
chrX	63910640	63910826
chrX	65894917	65895040
chrX	66207954	66208139
chrX	72989933	72990063
chrX	78330818	78331033
chrX	81120842	81120965
chrX	93328698	93328850
chrX	94096104	94096256
chrX	94629777	94629925
chrX	95576006	95576137
chrX	100805809	100805975
chrX	100891132	100891309
chrX	103300975	103301102
chrX	130466290	130466476
chrX	132601834	132601967
chrX	135490991	135491143
chrX	135551217	135551340
chrX	136467141	136467267
chrX	139547195	139547334
chrX	140253653	140253784
chrX	143553801	143553955
chrX	149441224	149441360
chrX	149963060	149963183
chrX	155409802	155409979
chrX	157468330	157468457
chrX	158948666	158948805
chrX	162585585	162585717
chrX	165392544	165392669
