# Supplementary material for: YY1 and CTCF orchestrate a 3D chromatin looping switch during early neural lineage commitment
Source: HighWire-hosted journal article supplement (doi:10.1101/gr.215160.116), 2017-05-23
Supplement: Supplemental_Table_S10.xlsx [file Supplemental_Table_S10.xlsx]

## Sheet: ESand2i_E-8_E-8_Galaxy491-(Subt
Beagan et al. 2017
Table S10, Significant CTCF Peaks present in the ES 2i and ES serum cellular states (classified as '2i + serum')
#chr	start	end
chr1	3002642	3002871
chr1	4132637	4132980
chr1	4218321	4218633
chr1	4406727	4407194
chr1	4482005	4482434
chr1	4904493	4904758
chr1	5128624	5128888
chr1	5173610	5173948
chr1	5905410	5905712
chr1	5907929	5908271
chr1	6132255	6132549
chr1	6134035	6134435
chr1	6142558	6142940
chr1	6180709	6180932
chr1	6372833	6373090
chr1	6407971	6408353
chr1	6959488	6959716
chr1	6969770	6970016
chr1	6987735	6988050
chr1	7759691	7760005
chr1	8277656	8277969
chr1	8750404	8750677
chr1	9459532	9459917
chr1	9535273	9535575
chr1	9535903	9536187
chr1	9719566	9719918
chr1	9980178	9980403
chr1	10104848	10105098
chr1	10171845	10172143
chr1	10187052	10187386
chr1	10387945	10388261
chr1	10827347	10827561
chr1	10994245	10994476
chr1	11055303	11055573
chr1	11087339	11087600
chr1	11141641	11141941
chr1	11375929	11376256
chr1	12689202	12689533
chr1	12691755	12692033
chr1	12808883	12809152
chr1	12832816	12833089
chr1	12855458	12855780
chr1	12925856	12926239
chr1	12980188	12980718
chr1	12982787	12982959
chr1	13069683	13070028
chr1	13107837	13108619
chr1	13128370	13128665
chr1	13132932	13133329
chr1	13189261	13189498
chr1	13217307	13217681
chr1	13345706	13346120
chr1	13366897	13367227
chr1	13615793	13616017
chr1	13622365	13622623
chr1	13687466	13687784
chr1	13829752	13830042
chr1	14127754	14128046
chr1	14167354	14167561
chr1	14560787	14561154
chr1	14676268	14676550
chr1	14696336	14696662
chr1	14728406	14728831
chr1	14852489	14852804
chr1	14970443	14970674
chr1	15007775	15008090
chr1	15101569	15101821
chr1	15317437	15317869
chr1	15634158	15634391
chr1	15983667	15984035
chr1	15997032	15997328
chr1	16052064	16052562
chr1	16150204	16150513
chr1	16481276	16481740
chr1	16544066	16544324
chr1	16567808	16568134
chr1	16621839	16622194
chr1	17103162	17103425
chr1	17135608	17135889
chr1	17619745	17619988
chr1	17968241	17968512
chr1	18280163	18280453
chr1	18402892	18403176
chr1	18600713	18601059
chr1	18783758	18784108
chr1	19046383	19046792
chr1	19139917	19140157
chr1	19182604	19182894
chr1	19280240	19280517
chr1	19407084	19407336
chr1	19567296	19567509
chr1	20534639	20534964
chr1	20741188	20741491
chr1	20752345	20752645
chr1	20915460	20915709
chr1	20930222	20930471
chr1	20933095	20933448
chr1	21070574	21070811
chr1	21256851	21257204
chr1	21384314	21384586
chr1	21409517	21409859
chr1	21512158	21512501
chr1	22348393	22348669
chr1	22367700	22368091
chr1	22547370	22547687
chr1	23502181	23502556
chr1	23681830	23682179
chr1	23691375	23691626
chr1	23966328	23966656
chr1	24002322	24002603
chr1	24008317	24008605
chr1	24182065	24182267
chr1	24263339	24263582
chr1	24304269	24304541
chr1	24344435	24344741
chr1	24381779	24382086
chr1	24773732	24773998
chr1	25573364	25573553
chr1	25673878	25674132
chr1	25753621	25753983
chr1	26581427	26581665
chr1	26956799	26957023
chr1	26959192	26959446
chr1	27957158	27957493
chr1	28488012	28488271
chr1	29310865	29311046
chr1	29623034	29623223
chr1	30316427	30316807
chr1	30653030	30653324
chr1	30753199	30753559
chr1	30797741	30798023
chr1	30828705	30828982
chr1	30987738	30988049
chr1	31005233	31005505
chr1	31393999	31394283
chr1	31892189	31892424
chr1	31948813	31949084
chr1	32052732	32053011
chr1	32757003	32757370
chr1	33353054	33353287
chr1	33593542	33593818
chr1	33653921	33654212
chr1	33806026	33806256
chr1	33866955	33867197
chr1	33903653	33904031
chr1	33932561	33933065
chr1	33940354	33940614
chr1	34000820	34001216
chr1	34004788	34005063
chr1	34125153	34125580
chr1	34150517	34150839
chr1	34174601	34174917
chr1	34225387	34225628
chr1	34231804	34232065
chr1	34542710	34543110
chr1	34598099	34598339
chr1	34832417	34832677
chr1	34833327	34833626
chr1	34848682	34848898
chr1	34950674	34950960
chr1	35045155	35045386
chr1	35089497	35089792
chr1	35323547	35323819
chr1	35449329	35449630
chr1	35521999	35522249
chr1	35772806	35773298
chr1	35822487	35822729
chr1	35903411	35903792
chr1	36067040	36067360
chr1	36163811	36164155
chr1	36313064	36313436
chr1	36367441	36367731
chr1	36378628	36378957
chr1	36511292	36511707
chr1	36602675	36603071
chr1	36734900	36735167
chr1	36843154	36843653
chr1	36862413	36862581
chr1	36878790	36879104
chr1	36881610	36881840
chr1	36904863	36905242
chr1	36989920	36990258
chr1	37167762	37168044
chr1	37189334	37189645
chr1	37208835	37209043
chr1	37268691	37268931
chr1	37315373	37315625
chr1	37523539	37523783
chr1	37535979	37536251
chr1	37595606	37595892
chr1	37693153	37693343
chr1	37698859	37699139
chr1	37710859	37711244
chr1	37711463	37711726
chr1	37732281	37732610
chr1	37762012	37762279
chr1	37988594	37989026
chr1	38030394	38030646
chr1	38364176	38364394
chr1	38696564	38696863
chr1	38711844	38712160
chr1	38777117	38777472
chr1	38835211	38835440
chr1	39237425	39237686
chr1	39263805	39264113
chr1	39274394	39274794
chr1	39284609	39284834
chr1	39286895	39287231
chr1	39310675	39310928
chr1	39401876	39402127
chr1	39409612	39409959
chr1	39419057	39419300
chr1	39473238	39473529
chr1	39473733	39474101
chr1	39485955	39486231
chr1	39553915	39554174
chr1	39554590	39555040
chr1	39698486	39698899
chr1	39737424	39737741
chr1	40347516	40347769
chr1	40820976	40821246
chr1	40941758	40942160
chr1	41115153	41115460
chr1	41162351	41162605
chr1	41443321	41443646
chr1	42017928	42018180
chr1	42217689	42217939
chr1	42571318	42571622
chr1	42879617	42879879
chr1	42912963	42913602
chr1	43050688	43050958
chr1	43108883	43109070
chr1	43195061	43195515
chr1	43337001	43337301
chr1	43502348	43502665
chr1	43568180	43568427
chr1	43789011	43789251
chr1	44006709	44006942
chr1	44023595	44023996
chr1	44212093	44212493
chr1	44224876	44225126
chr1	44230754	44231102
chr1	44294229	44294491
chr1	45826973	45827297
chr1	45919807	45920067
chr1	46075294	46075594
chr1	46123301	46123510
chr1	46123863	46124161
chr1	46482534	46482862
chr1	46485266	46485548
chr1	46826196	46826550
chr1	51394952	51395314
chr1	51404449	51404771
chr1	51695734	51696086
chr1	51784037	51784274
chr1	52157360	52157719
chr1	52176034	52176258
chr1	52188782	52189105
chr1	52226850	52227277
chr1	52273636	52274018
chr1	52358061	52358444
chr1	52449847	52450120
chr1	52543080	52543364
chr1	52546683	52546978
chr1	52638799	52639192
chr1	52688446	52688829
chr1	52775981	52776278
chr1	53021440	53021859
chr1	53150045	53150507
chr1	53679229	53679625
chr1	53761033	53761357
chr1	53763142	53763490
chr1	53769275	53769575
chr1	54332333	54332759
chr1	54419489	54419790
chr1	54430729	54430972
chr1	54537357	54537589
chr1	54570726	54571057
chr1	54597925	54598189
chr1	54793796	54794050
chr1	54812685	54812921
chr1	54926775	54927040
chr1	54991605	54991915
chr1	55040195	55040618
chr1	55065194	55065517
chr1	55082550	55082819
chr1	55099122	55099465
chr1	55138941	55139264
chr1	55192682	55193036
chr1	55218791	55219230
chr1	55322365	55322569
chr1	55350594	55350841
chr1	55504509	55504833
chr1	55530718	55530998
chr1	56252142	56252418
chr1	56810173	56810454
chr1	57057253	57057535
chr1	57152486	57152685
chr1	57745677	57745884
chr1	58146393	58146635
chr1	58195860	58196203
chr1	58197456	58197746
chr1	58292359	58292593
chr1	58452279	58452607
chr1	58453101	58453391
chr1	58472396	58472705
chr1	58505288	58505691
chr1	58555656	58556036
chr1	58617251	58617684
chr1	58636045	58636424
chr1	58641172	58641414
chr1	58675664	58676077
chr1	58859319	58859613
chr1	59127712	59128288
chr1	59201334	59201735
chr1	59207463	59207677
chr1	59300686	59300947
chr1	59343249	59343700
chr1	59357829	59358103
chr1	59497993	59498242
chr1	59510279	59510589
chr1	59528543	59528805
chr1	59580198	59580607
chr1	59620317	59620544
chr1	59637846	59638041
chr1	59665736	59666660
chr1	59667818	59668157
chr1	59683803	59684270
chr1	59687510	59687950
chr1	59695267	59695573
chr1	59718148	59718491
chr1	59746324	59746634
chr1	59747374	59747742
chr1	59806534	59806933
chr1	59840954	59841151
chr1	59869555	59869893
chr1	59919447	59919763
chr1	59949674	59949937
chr1	60029976	60030224
chr1	60057345	60057666
chr1	60062385	60062639
chr1	60065442	60065746
chr1	60111439	60111874
chr1	60161397	60161827
chr1	60209665	60209869
chr1	60224233	60224430
chr1	60289575	60289857
chr1	60329374	60329630
chr1	60397763	60398054
chr1	60439449	60439645
chr1	60461766	60462075
chr1	60468177	60468460
chr1	60480779	60481053
chr1	60485738	60486178
chr1	60498129	60498626
chr1	60503956	60504304
chr1	60505560	60505824
chr1	60591762	60592108
chr1	60615415	60615683
chr1	60777087	60777378
chr1	60835688	60835994
chr1	60879766	60880259
chr1	60914226	60914522
chr1	61015175	61015500
chr1	61018915	61019307
chr1	61158480	61158830
chr1	61182031	61182266
chr1	61571502	61571774
chr1	61787591	61787824
chr1	61823591	61823851
chr1	62424868	62425287
chr1	62784869	62785158
chr1	62821484	62821853
chr1	63137227	63137746
chr1	63147531	63147774
chr1	63157464	63157857
chr1	63192812	63193015
chr1	63238656	63238850
chr1	63251023	63251230
chr1	63259549	63259854
chr1	63265882	63266314
chr1	63288904	63289178
chr1	63656233	63656620
chr1	63901419	63901706
chr1	63928490	63928699
chr1	64000078	64000360
chr1	64465188	64465571
chr1	64508150	64508573
chr1	64590421	64590680
chr1	64702377	64702689
chr1	65232182	65232484
chr1	65356709	65357218
chr1	66033246	66033505
chr1	66894125	66894436
chr1	67524578	67525092
chr1	67568196	67568491
chr1	68799388	68799627
chr1	69111756	69111956
chr1	69423457	69423838
chr1	69535291	69535491
chr1	69822239	69822671
chr1	70833696	70834101
chr1	71235169	71235571
chr1	71517521	71517805
chr1	71656082	71656292
chr1	71722038	71722329
chr1	71824919	71825243
chr1	72030557	72030771
chr1	72212705	72213199
chr1	72213644	72213995
chr1	72271509	72271706
chr1	72299004	72299244
chr1	72748365	72748742
chr1	72925875	72926238
chr1	74229609	74229886
chr1	74250136	74250414
chr1	74315428	74315753
chr1	74373499	74373959
chr1	74488440	74488719
chr1	74488871	74489087
chr1	74502890	74503160
chr1	74650444	74650906
chr1	74721027	74721391
chr1	74770223	74770962
chr1	74803408	74803668
chr1	74855604	74855921
chr1	74861561	74861878
chr1	74870259	74870556
chr1	74908433	74908726
chr1	74962303	74962712
chr1	75000799	75001099
chr1	75020216	75020490
chr1	75118871	75119277
chr1	75157672	75157953
chr1	75160190	75160493
chr1	75178798	75179076
chr1	75216186	75216486
chr1	75229045	75229508
chr1	75249574	75249918
chr1	75291436	75291732
chr1	75319983	75320203
chr1	75324101	75324355
chr1	75360087	75360398
chr1	75496044	75496354
chr1	75678499	75678830
chr1	75738262	75738542
chr1	75808793	75809024
chr1	75952354	75952718
chr1	75993863	75994119
chr1	76842099	76842423
chr1	77078253	77078565
chr1	77493260	77493528
chr1	77688088	77688297
chr1	77801778	77802079
chr1	77927267	77927616
chr1	78033328	78033606
chr1	78227396	78227656
chr1	78264086	78264454
chr1	78527119	78527346
chr1	78553932	78554273
chr1	78683483	78683855
chr1	78703883	78704263
chr1	78843076	78843390
chr1	78966149	78966395
chr1	79611061	79611333
chr1	79622793	79623044
chr1	80227274	80227485
chr1	80296163	80296433
chr1	80518788	80519170
chr1	80652462	80652772
chr1	80719274	80719565
chr1	81299979	81300309
chr1	81303998	81304318
chr1	81316393	81316667
chr1	81588252	81588534
chr1	82286800	82287027
chr1	82478064	82478279
chr1	82758912	82759216
chr1	82769721	82770003
chr1	82785923	82786214
chr1	82956587	82956936
chr1	82996987	82997232
chr1	83146707	83147153
chr1	83359756	83360020
chr1	84098594	84098991
chr1	84126944	84127171
chr1	84738050	84738306
chr1	84813744	84813979
chr1	84838409	84838663
chr1	84863307	84863632
chr1	84866132	84866513
chr1	84876266	84876693
chr1	84877137	84877381
chr1	84877812	84878285
chr1	84882501	84882863
chr1	84991438	84991639
chr1	85065737	85065941
chr1	85116846	85117151
chr1	85283758	85284058
chr1	85338838	85339111
chr1	87478108	87478411
chr1	87738857	87739282
chr1	87751081	87751278
chr1	87796051	87796452
chr1	87918245	87918518
chr1	87959090	87959383
chr1	87990375	87990621
chr1	88040816	88041177
chr1	88049187	88049613
chr1	88071217	88071474
chr1	88085588	88085936
chr1	88147321	88147637
chr1	88206514	88206848
chr1	88243683	88244001
chr1	88277568	88278022
chr1	88289530	88289808
chr1	88292487	88292913
chr1	88297878	88298151
chr1	88318568	88318871
chr1	88367870	88368300
chr1	88417040	88417315
chr1	88430260	88430845
chr1	88433451	88433682
chr1	88435048	88435470
chr1	88436243	88436564
chr1	88506093	88506361
chr1	88508685	88509052
chr1	88512233	88512493
chr1	88517236	88517572
chr1	88549308	88549606
chr1	88593532	88593892
chr1	88596356	88596642
chr1	88811378	88811595
chr1	88869283	88869570
chr1	88957555	88957843
chr1	88983572	88983852
chr1	89088496	89088732
chr1	89102947	89103255
chr1	89105543	89105775
chr1	89178903	89179613
chr1	89261483	89261713
chr1	89400521	89400764
chr1	89404335	89404644
chr1	89592946	89593332
chr1	89707076	89707301
chr1	89721866	89722214
chr1	89860197	89860479
chr1	89982199	89982535
chr1	90046686	90046909
chr1	90113761	90114086
chr1	90198177	90198574
chr1	90370576	90370822
chr1	90614388	90614657
chr1	90617468	90617870
chr1	90646724	90647081
chr1	90673615	90673998
chr1	90703579	90703900
chr1	90712662	90712923
chr1	90796999	90797257
chr1	90860418	90860687
chr1	90903307	90903563
chr1	90954635	90954957
chr1	91023750	91024115
chr1	91071889	91072275
chr1	91089362	91089807
chr1	91173108	91173432
chr1	91241041	91241503
chr1	91261601	91261839
chr1	91479983	91480297
chr1	91530605	91530999
chr1	91570317	91570577
chr1	91627014	91627473
chr1	91649225	91649585
chr1	91666829	91667258
chr1	91717563	91717876
chr1	91740606	91741022
chr1	91756902	91757209
chr1	91835726	91836195
chr1	91836670	91837366
chr1	91909161	91910228
chr1	92049718	92049981
chr1	92056105	92056877
chr1	92089870	92090084
chr1	92169119	92169372
chr1	92265959	92266206
chr1	92269379	92269634
chr1	92368416	92368721
chr1	92375520	92375725
chr1	92453694	92454135
chr1	92474085	92474303
chr1	92689995	92690273
chr1	92726610	92726935
chr1	92768635	92769016
chr1	92806502	92806799
chr1	92917890	92918251
chr1	93004194	93004443
chr1	93025489	93025808
chr1	93286734	93286983
chr1	93375611	93375860
chr1	93411567	93411811
chr1	93430943	93431277
chr1	93579168	93579371
chr1	93704419	93704700
chr1	93715781	93716241
chr1	94018839	94019160
chr1	94172032	94172303
chr1	94529534	94529892
chr1	94604496	94604828
chr1	94746133	94746413
chr1	94805659	94805978
chr1	94846036	94846371
chr1	94881637	94881911
chr1	94988334	94988613
chr1	95049640	95049809
chr1	95133156	95133452
chr1	95134884	95135103
chr1	95211477	95211712
chr1	95275696	95276072
chr1	95296620	95296885
chr1	95346733	95346964
chr1	95490560	95490871
chr1	95499611	95499858
chr1	95545372	95545621
chr1	95557873	95558161
chr1	95564473	95564654
chr1	95622804	95623073
chr1	95639422	95639842
chr1	95698451	95698731
chr1	95723990	95724583
chr1	95787589	95787936
chr1	95821741	95822000
chr1	95866101	95866352
chr1	95890328	95890563
chr1	97293777	97294083
chr1	98664889	98665109
chr1	98685876	98686172
chr1	99143409	99143647
chr1	99543699	99543945
chr1	99623332	99623662
chr1	99666917	99667182
chr1	99681570	99681821
chr1	99690728	99690963
chr1	99706126	99706368
chr1	99773590	99774063
chr1	99950172	99950377
chr1	100041514	100041766
chr1	100336833	100337067
chr1	100645527	100645785
chr1	101670764	101671012
chr1	102453488	102453855
chr1	102783982	102784230
chr1	103335470	103335687
chr1	103525645	103525918
chr1	104275183	104275568
chr1	105036823	105037000
chr1	105235250	105235441
chr1	105659403	105659690
chr1	107259296	107259724
chr1	107460441	107460777
chr1	107631892	107632190
chr1	107676998	107677336
chr1	107782275	107782502
chr1	107801286	107801715
chr1	108048388	108048703
chr1	108048825	108049074
chr1	108857585	108858044
chr1	110667172	110667471
chr1	110721465	110721719
chr1	110769078	110769354
chr1	111731186	111731517
chr1	111882100	111882454
chr1	114350053	114350344
chr1	114600597	114600883
chr1	114771320	114771586
chr1	115734487	115734705
chr1	116858485	116858857
chr1	117583138	117583365
chr1	118291409	118291601
chr1	118314194	118314398
chr1	119251193	119251585
chr1	119275717	119275989
chr1	119309004	119309321
chr1	119393244	119393433
chr1	119909460	119909642
chr1	120389466	120389734
chr1	120402406	120402668
chr1	120425846	120426195
chr1	120461171	120461571
chr1	120524300	120524533
chr1	120866740	120866924
chr1	120918607	120918906
chr1	120971438	120971964
chr1	120991494	120991759
chr1	121050268	121050626
chr1	121056956	121057213
chr1	121340600	121340847
chr1	121379582	121379823
chr1	121390935	121391233
chr1	121550968	121551284
chr1	121582299	121582861
chr1	121668468	121668847
chr1	121703198	121703439
chr1	121815858	121816270
chr1	121835294	121835663
chr1	121862536	121862760
chr1	122054197	122054580
chr1	122149380	122149698
chr1	122186503	122186744
chr1	122193568	122193953
chr1	122264691	122265127
chr1	122463303	122463489
chr1	122525503	122525741
chr1	122536511	122536702
chr1	122582478	122582788
chr1	122594816	122595116
chr1	122610523	122610754
chr1	123286167	123286534
chr1	123315730	123316044
chr1	123446070	123446432
chr1	123481040	123481342
chr1	123525424	123525744
chr1	123604954	123605211
chr1	123695135	123695311
chr1	123699946	123700269
chr1	123800646	123800926
chr1	123904391	123904655
chr1	124032666	124032941
chr1	124066180	124066443
chr1	124248175	124248487
chr1	124886275	124886525
chr1	124899931	124900200
chr1	125310818	125311120
chr1	126194980	126195254
chr1	126452996	126453300
chr1	127279262	127279542
chr1	127413881	127414232
chr1	127478341	127478652
chr1	127543501	127543750
chr1	127565664	127565970
chr1	127602013	127602380
chr1	128184090	128184310
chr1	128304412	128304797
chr1	128393267	128393720
chr1	128465393	128465883
chr1	128509510	128509815
chr1	128622950	128623363
chr1	128844520	128844768
chr1	128849883	128850080
chr1	129010991	129011239
chr1	129101757	129102047
chr1	129176855	129177235
chr1	129226944	129227202
chr1	129598851	129599055
chr1	129662142	129662404
chr1	129944518	129944782
chr1	130063741	130063981
chr1	130119919	130120236
chr1	130178392	130178725
chr1	130179539	130179856
chr1	130221435	130221777
chr1	130293033	130293248
chr1	130463589	130463773
chr1	130717181	130717395
chr1	130718276	130718545
chr1	130840311	130840568
chr1	131023507	131023846
chr1	131247954	131248119
chr1	131387719	131388020
chr1	131723512	131723876
chr1	132238999	132239345
chr1	132683660	132683925
chr1	132734951	132735185
chr1	132823119	132823367
chr1	133018550	133018925
chr1	133096648	133096849
chr1	133225755	133226037
chr1	133445635	133445893
chr1	133462764	133463014
chr1	133515215	133515490
chr1	133598012	133598344
chr1	133611490	133611881
chr1	133660315	133660528
chr1	133710798	133711092
chr1	133772225	133772489
chr1	133780446	133780703
chr1	133801995	133802424
chr1	133911440	133911745
chr1	133927218	133927524
chr1	134121707	134122004
chr1	134122605	134122851
chr1	134130243	134130474
chr1	134132787	134133397
chr1	134151133	134151340
chr1	134157676	134158058
chr1	134187562	134187827
chr1	134189420	134189893
chr1	134227866	134228282
chr1	134247696	134247977
chr1	134366164	134366441
chr1	134369149	134369513
chr1	134552315	134552508
chr1	134574748	134575030
chr1	134617023	134617305
chr1	134698894	134699309
chr1	134867258	134867526
chr1	134909863	134910331
chr1	134917937	134918294
chr1	134948390	134948782
chr1	135012724	135013003
chr1	135022242	135022621
chr1	135122572	135122913
chr1	135161984	135162307
chr1	135214891	135215149
chr1	135223744	135224003
chr1	135482677	135482905
chr1	135510502	135510910
chr1	135594022	135594370
chr1	135832792	135833058
chr1	135933090	135933470
chr1	136007663	136007915
chr1	136085737	136085982
chr1	136178177	136178512
chr1	136187445	136187895
chr1	136236327	136236701
chr1	136296291	136296624
chr1	136308867	136309122
chr1	136311491	136311737
chr1	136346973	136347149
chr1	136391527	136391899
chr1	136421010	136421386
chr1	136500148	136500448
chr1	136570781	136571243
chr1	136577314	136577591
chr1	136638056	136638251
chr1	136792440	136792635
chr1	136804018	136804309
chr1	136827159	136827497
chr1	136859329	136859698
chr1	136920238	136920549
chr1	136926742	136927001
chr1	136959577	136959871
chr1	136961203	136961427
chr1	137005187	137005589
chr1	137067858	137068116
chr1	137152970	137153194
chr1	137158169	137158652
chr1	137258759	137259066
chr1	137278166	137278581
chr1	137291508	137291849
chr1	137298057	137298289
chr1	137348908	137349244
chr1	137368745	137369059
chr1	137372169	137372381
chr1	137464988	137465195
chr1	137567925	137568260
chr1	137572466	137572721
chr1	137644088	137644327
chr1	137656890	137657160
chr1	137685339	137685769
chr1	138010429	138010718
chr1	138056431	138056742
chr1	138131069	138131286
chr1	138140414	138140595
chr1	138237149	138237519
chr1	138310910	138311207
chr1	138324072	138324383
chr1	138398911	138399135
chr1	138399588	138399852
chr1	138423818	138424246
chr1	138433526	138433944
chr1	138435154	138435585
chr1	138453270	138453588
chr1	138461511	138461834
chr1	138468626	138469003
chr1	138500785	138501052
chr1	138606664	138607145
chr1	138633427	138633836
chr1	138640825	138641239
chr1	138655270	138655688
chr1	138655778	138656156
chr1	138670334	138670744
chr1	138752694	138753088
chr1	138763272	138763698
chr1	138884870	138885206
chr1	138900440	138900789
chr1	138950495	138950792
chr1	139021580	139021778
chr1	139105241	139105498
chr1	139114623	139115217
chr1	139123008	139123695
chr1	139194784	139195152
chr1	139220526	139220892
chr1	139230748	139231084
chr1	139932749	139932967
chr1	140016516	140016950
chr1	140224804	140225164
chr1	140451053	140451276
chr1	140611735	140612081
chr1	141222080	141222267
chr1	141275851	141276363
chr1	141304299	141304634
chr1	141325945	141326285
chr1	141376877	141377166
chr1	141385222	141385483
chr1	141416955	141417247
chr1	142380594	142381025
chr1	142556214	142556588
chr1	142748237	142748449
chr1	143331903	143332440
chr1	145160366	145160626
chr1	145459467	145459747
chr1	145460098	145460356
chr1	145577982	145578470
chr1	145579735	145580069
chr1	146026709	146026996
chr1	148375774	148376008
chr1	148539983	148540213
chr1	149152618	149152937
chr1	151640927	151641118
chr1	151642541	151642826
chr1	151705719	151706203
chr1	152104789	152105086
chr1	152218237	152218576
chr1	152671792	152672080
chr1	152913773	152914265
chr1	152950176	152950383
chr1	153200107	153200412
chr1	153224378	153224812
chr1	153290365	153290707
chr1	153296340	153296671
chr1	153298086	153298341
chr1	153311268	153311495
chr1	153330641	153331046
chr1	153339591	153339864
chr1	153344116	153344569
chr1	153402289	153402542
chr1	153479778	153480141
chr1	153495299	153495629
chr1	153549887	153550243
chr1	153614101	153614692
chr1	153693587	153693873
chr1	153708477	153708849
chr1	154033747	154033992
chr1	154079074	154079420
chr1	154108589	154108825
chr1	154160464	154161059
chr1	154465531	154465867
chr1	154522501	154522699
chr1	154525548	154525921
chr1	154571472	154571759
chr1	154895170	154895521
chr1	154930446	154930641
chr1	154944131	154944353
chr1	154962483	154962801
chr1	155163725	155163910
chr1	155179167	155179468
chr1	155247823	155248053
chr1	155293341	155293797
chr1	155329043	155329424
chr1	155336216	155336490
chr1	155349231	155349470
chr1	155357747	155358220
chr1	155370093	155370333
chr1	155388914	155389171
chr1	155409499	155409803
chr1	155410807	155411169
chr1	155734654	155734900
chr1	155815114	155815346
chr1	155943100	155943494
chr1	156686074	156686337
chr1	156737446	156737690
chr1	156855061	156855274
chr1	157304686	157305016
chr1	157415312	157415627
chr1	157461567	157461908
chr1	157472553	157472822
chr1	157523833	157524159
chr1	157639037	157639387
chr1	157736417	157736649
chr1	157887107	157887478
chr1	157958255	157958587
chr1	158311389	158311718
chr1	158411942	158412288
chr1	158417672	158417966
chr1	158422477	158422664
chr1	158435306	158435752
chr1	158496326	158496707
chr1	158514372	158514693
chr1	158556893	158557169
chr1	158570780	158571127
chr1	158660960	158661282
chr1	158694712	158695048
chr1	158759979	158760254
chr1	158784361	158784608
chr1	158791815	158792169
chr1	158809109	158809437
chr1	158819078	158819299
chr1	158821741	158822059
chr1	159011638	159011967
chr1	159022326	159022593
chr1	159388420	159388774
chr1	159473446	159473613
chr1	159488377	159488680
chr1	159595692	159596115
chr1	159656282	159656683
chr1	159748743	159748942
chr1	160197449	160197673
chr1	160528239	160528496
chr1	160627665	160627930
chr1	160774735	160775067
chr1	161243217	161243483
chr1	161243963	161244254
chr1	161252736	161253069
chr1	161382913	161383114
chr1	161622099	161622445
chr1	161841154	161841517
chr1	162077471	162077732
chr1	162114654	162114997
chr1	162148847	162149164
chr1	162183309	162183562
chr1	162246315	162246870
chr1	162295004	162295226
chr1	162308564	162308863
chr1	162647883	162648264
chr1	162773845	162774172
chr1	162784632	162784826
chr1	162852077	162852663
chr1	162865769	162865999
chr1	163070176	163070571
chr1	163184627	163185238
chr1	163288350	163288597
chr1	163320217	163320548
chr1	163575693	163575947
chr1	163579542	163579876
chr1	163977799	163978090
chr1	164022622	164022928
chr1	164500580	164500920
chr1	164511064	164511312
chr1	164576499	164576765
chr1	164735217	164735502
chr1	164810131	164810380
chr1	165217923	165218122
chr1	165236137	165236410
chr1	165275134	165275400
chr1	165627086	165627391
chr1	165772367	165772747
chr1	165949291	165949868
chr1	165952271	165952605
chr1	165957588	165957984
chr1	165984955	165985332
chr1	166058545	166059143
chr1	166533621	166533917
chr1	166929619	166930079
chr1	167044835	167045186
chr1	167095812	167096061
chr1	167126541	167126810
chr1	167160856	167161198
chr1	167171006	167171291
chr1	167219987	167220335
chr1	167295239	167295556
chr1	167391269	167391461
chr1	167497017	167497266
chr1	167585205	167585493
chr1	167602575	167602872
chr1	167609350	167609909
chr1	167821926	167822187
chr1	167851172	167851465
chr1	168053187	168053521
chr1	168088741	168089089
chr1	168197763	168198059
chr1	168652972	168653224
chr1	168724812	168725099
chr1	168751310	168751639
chr1	169065050	169065294
chr1	169161078	169161357
chr1	169161682	169161971
chr1	169206348	169206662
chr1	169236373	169236923
chr1	169243431	169243699
chr1	169273044	169273269
chr1	169278346	169278619
chr1	169324249	169324784
chr1	169376615	169376911
chr1	169794543	169794764
chr1	169802150	169802509
chr1	169819075	169819357
chr1	169858123	169858397
chr1	169873012	169873220
chr1	169995631	169995902
chr1	171087012	171087274
chr1	171877887	171878177
chr1	172085472	172085769
chr1	172105139	172105458
chr1	172448425	172448610
chr1	172501239	172501506
chr1	172503936	172504139
chr1	172707840	172708131
chr1	172774510	172774979
chr1	172937069	172937386
chr1	172944216	172944469
chr1	172969346	172969604
chr1	172973782	172974088
chr1	172994631	172994849
chr1	173048463	173048686
chr1	173069837	173070069
chr1	173089535	173089832
chr1	173094271	173094775
chr1	173098112	173098363
chr1	173120267	173120630
chr1	173194242	173194586
chr1	173274519	173274707
chr1	173300461	173300727
chr1	173312195	173312432
chr1	173425632	173425857
chr1	173443458	173443788
chr1	173445241	173445514
chr1	173463034	173463393
chr1	173540197	173540536
chr1	173540853	173541218
chr1	173717958	173718240
chr1	173755620	173755909
chr1	173756333	173756662
chr1	173905094	173905345
chr1	173905569	173905821
chr1	174173917	174174301
chr1	174235786	174236130
chr1	174274649	174274915
chr1	174311352	174311552
chr1	174315339	174315540
chr1	174380406	174380665
chr1	174429842	174430195
chr1	174443008	174443295
chr1	175116593	175116830
chr1	175126560	175126805
chr1	175427770	175428008
chr1	175535722	175535931
chr1	175703620	175703912
chr1	175849450	175849748
chr1	176541723	176541958
chr1	176604765	176605172
chr1	177229790	177230106
chr1	177276407	177276643
chr1	177713954	177714223
chr1	177741812	177742118
chr1	177896624	177896853
chr1	177938593	177938865
chr1	178148407	178148711
chr1	178195270	178195559
chr1	178261485	178261857
chr1	178397166	178397381
chr1	178809179	178809425
chr1	179058997	179059217
chr1	179166894	179167131
chr1	179338910	179339128
chr1	179550875	179551271
chr1	179704869	179705173
chr1	179727507	179727833
chr1	179770030	179770328
chr1	179913788	179914181
chr1	180281875	180282060
chr1	180290965	180291309
chr1	180291635	180291949
chr1	180415749	180415982
chr1	180490194	180490507
chr1	180619689	180619991
chr1	180678795	180679077
chr1	180681875	180682178
chr1	180780857	180781113
chr1	180910376	180910668
chr1	181126578	181126907
chr1	181150464	181150736
chr1	181168138	181168547
chr1	181233114	181233396
chr1	181394285	181394607
chr1	181448062	181448291
chr1	181471686	181471994
chr1	181508418	181508690
chr1	181523078	181523613
chr1	181633076	181633293
chr1	181643538	181643813
chr1	181658870	181659110
chr1	181809706	181809952
chr1	182061532	182062000
chr1	182081343	182081647
chr1	182404499	182404772
chr1	182501882	182502121
chr1	182554042	182554414
chr1	182596740	182597071
chr1	182705412	182705707
chr1	182723685	182723925
chr1	182729756	182730034
chr1	182741103	182741383
chr1	182807384	182807975
chr1	182868861	182869445
chr1	182916873	182917201
chr1	183079631	183079861
chr1	183097611	183097872
chr1	183186332	183186598
chr1	183211043	183211247
chr1	183214455	183214759
chr1	183323418	183323661
chr1	183441523	183441773
chr1	183652881	183653145
chr1	183677703	183677967
chr1	183699498	183699930
chr1	183758494	183758858
chr1	183780270	183780508
chr1	183797145	183797504
chr1	183806009	183806239
chr1	183811045	183811498
chr1	183813650	183813860
chr1	183824639	183824868
chr1	183825921	183826129
chr1	183846640	183847052
chr1	183851635	183851898
chr1	184068307	184068656
chr1	184073426	184073896
chr1	184252273	184252492
chr1	184286228	184286625
chr1	184311496	184311827
chr1	184405510	184405899
chr1	184420662	184421019
chr1	184717202	184717540
chr1	184782384	184782684
chr1	184905027	184905345
chr1	185490575	185490814
chr1	185523170	185523786
chr1	185678038	185678575
chr1	186081356	186081577
chr1	186086868	186087245
chr1	186315978	186316284
chr1	186321890	186322219
chr1	186565309	186565640
chr1	186593383	186593706
chr1	186600859	186601312
chr1	186610420	186610995
chr1	186616970	186617407
chr1	186626363	186626716
chr1	186641684	186642001
chr1	186656054	186656569
chr1	187025966	187026232
chr1	187060495	187060790
chr1	187086442	187086835
chr1	187093050	187093299
chr1	187155203	187155465
chr1	187167374	187167612
chr1	187170126	187170441
chr1	187508527	187508915
chr1	187638826	187639100
chr1	187667156	187667445
chr1	187753709	187754070
chr1	187801039	187801245
chr1	187837341	187837579
chr1	187871154	187871438
chr1	188065023	188065320
chr1	188113001	188113283
chr1	188207295	188207713
chr1	188333210	188333522
chr1	188522799	188523221
chr1	188543606	188543945
chr1	188592336	188592684
chr1	188594440	188594969
chr1	189184135	189184399
chr1	189190727	189191035
chr1	189424836	189425092
chr1	189513622	189513950
chr1	189569639	189569940
chr1	189703663	189703895
chr1	189814072	189814382
chr1	189830556	189830759
chr1	190145394	190145775
chr1	190332879	190333167
chr1	190367298	190367566
chr1	190421964	190422321
chr1	190532124	190532419
chr1	190671044	190671253
chr1	190678994	190679297
chr1	190684361	190684568
chr1	190741740	190742005
chr1	190825730	190826104
chr1	190881337	190881745
chr1	190906301	190906558
chr1	190914122	190914430
chr1	190939244	190939467
chr1	191077079	191077428
chr1	191374678	191375108
chr1	191527069	191527291
chr1	191544205	191544538
chr1	191626521	191626803
chr1	191688185	191688466
chr1	191691907	191692204
chr1	191693730	191694131
chr1	191694317	191694714
chr1	191865197	191865464
chr1	191939903	191940198
chr1	192002894	192003199
chr1	192005856	192006143
chr1	192072398	192072606
chr1	192572870	192573123
chr1	192593740	192593944
chr1	192736518	192736882
chr1	192820453	192820657
chr1	192832568	192832989
chr1	192878823	192879115
chr1	192996425	192996706
chr1	193017985	193018267
chr1	193106269	193106517
chr1	193129536	193129883
chr1	193130203	193130466
chr1	193188378	193188730
chr1	193293541	193293746
chr1	193391816	193392068
chr1	193541737	193542034
chr1	193630663	193630955
chr1	193749476	193749733
chr1	193887141	193887401
chr1	194148159	194148431
chr1	194370875	194371068
chr1	194486678	194487300
chr1	194591651	194592065
chr1	194616661	194616974
chr1	194621574	194621831
chr1	194681174	194681364
chr1	194695955	194696237
chr1	194706381	194706687
chr1	194708909	194709164
chr1	194905587	194905781
chr1	194910276	194910596
chr1	194959960	194960254
chr1	195099483	195099728
chr1	195266655	195267183
chr1	195476501	195476836
chr1	195568884	195569234
chr1	196442727	196442972
chr1	196548609	196548867
chr1	196579355	196579724
chr1	197002844	197003101
chr10	3170735	3170904
chr10	3277604	3277991
chr10	3569638	3569862
chr10	3617683	3618041
chr10	4480246	4480537
chr10	4772752	4773216
chr10	4865649	4865983
chr10	5040620	5040835
chr10	5719660	5720076
chr10	5752321	5752712
chr10	5800571	5800919
chr10	5976049	5976300
chr10	5995111	5995526
chr10	6075398	6075723
chr10	6169292	6169578
chr10	6194843	6195320
chr10	6387537	6387891
chr10	6459493	6459751
chr10	6496208	6496517
chr10	6512143	6512446
chr10	6540828	6541061
chr10	6544933	6545206
chr10	6778358	6778630
chr10	6784030	6784401
chr10	6791090	6791298
chr10	6833316	6833639
chr10	6948791	6949065
chr10	7556899	7557135
chr10	7818213	7818501
chr10	8248988	8249337
chr10	8406151	8406334
chr10	8498683	8499048
chr10	8553618	8553942
chr10	8600778	8601109
chr10	8632782	8633099
chr10	8887284	8887558
chr10	9510794	9511080
chr10	9516331	9516548
chr10	10759126	10759584
chr10	10876869	10877155
chr10	11159171	11159468
chr10	11177275	11177725
chr10	11938749	11938996
chr10	12268540	12268733
chr10	12303317	12303578
chr10	12381878	12382182
chr10	12420324	12420836
chr10	12636520	12636893
chr10	12641310	12641558
chr10	12790895	12791165
chr10	12847141	12847491
chr10	13361618	13361860
chr10	13937163	13937366
chr10	14225454	14225662
chr10	14405558	14405834
chr10	16997775	16998032
chr10	17436048	17436367
chr10	17491327	17491589
chr10	17758117	17758390
chr10	17903737	17904011
chr10	17953689	17954037
chr10	18274245	18274510
chr10	18281273	18281539
chr10	18489681	18490128
chr10	18629102	18629455
chr10	18719197	18719502
chr10	18907999	18908199
chr10	19072810	19073054
chr10	19104092	19104316
chr10	19132724	19133064
chr10	19235875	19236119
chr10	19321278	19321709
chr10	19404210	19404379
chr10	19413498	19413818
chr10	19697416	19697682
chr10	20028307	20028741
chr10	20091870	20092152
chr10	20224668	20224926
chr10	20390406	20390676
chr10	20683598	20683923
chr10	20898689	20898969
chr10	21140907	21141191
chr10	21178454	21178739
chr10	21249002	21249266
chr10	21711069	21711412
chr10	21792564	21792873
chr10	21868232	21868481
chr10	21994434	21994931
chr10	22166654	22166893
chr10	22199728	22199973
chr10	22213981	22214241
chr10	22286909	22287328
chr10	22501315	22501651
chr10	22502579	22502795
chr10	22577997	22578314
chr10	22639081	22639279
chr10	22870247	22870589
chr10	23170834	23171133
chr10	23434955	23435211
chr10	23559229	23559483
chr10	24553468	24553731
chr10	24568414	24568600
chr10	24584293	24584593
chr10	24593405	24593921
chr10	24615816	24616069
chr10	24789957	24790227
chr10	24883325	24883666
chr10	24927785	24927987
chr10	24976902	24977401
chr10	25004619	25005041
chr10	25115126	25115330
chr10	25135041	25135382
chr10	25219470	25219823
chr10	25367619	25367878
chr10	25607960	25608191
chr10	26067890	26068114
chr10	26461242	26461497
chr10	26882293	26882561
chr10	27836879	27837135
chr10	28866016	28866649
chr10	28919710	28919971
chr10	29114771	29115046
chr10	30237100	30237426
chr10	30257929	30258178
chr10	30306994	30307209
chr10	30449276	30449615
chr10	30520631	30520822
chr10	30558058	30558357
chr10	30946495	30946783
chr10	32032974	32033227
chr10	32918080	32918475
chr10	33029025	33029262
chr10	33090382	33090694
chr10	33428554	33428804
chr10	33432291	33432587
chr10	33647113	33647347
chr10	33888169	33888441
chr10	34005545	34005948
chr10	34058256	34058597
chr10	34087990	34088301
chr10	34119145	34119400
chr10	34204864	34205175
chr10	34358095	34358372
chr10	34795018	34795235
chr10	35016267	35016454
chr10	36501518	36501767
chr10	36701753	36702058
chr10	36834360	36834599
chr10	37512741	37513066
chr10	38349396	38349615
chr10	38722370	38722639
chr10	38878154	38878488
chr10	39118738	39119047
chr10	39161476	39161738
chr10	39496785	39497047
chr10	39616257	39616653
chr10	39812484	39812724
chr10	39899009	39899219
chr10	39969520	39969803
chr10	39984777	39985037
chr10	40025860	40026126
chr10	40050245	40050446
chr10	40067190	40067412
chr10	40090039	40090322
chr10	40093248	40093455
chr10	40117025	40117201
chr10	40260441	40260701
chr10	40325009	40325226
chr10	40533412	40533880
chr10	40821372	40821666
chr10	40930548	40930775
chr10	41078456	41078686
chr10	41100293	41100659
chr10	41113452	41113702
chr10	41351908	41352375
chr10	41692975	41693270
chr10	41706019	41706255
chr10	41851622	41851952
chr10	42011177	42011686
chr10	42014878	42015121
chr10	42017748	42018204
chr10	42094008	42094304
chr10	42174520	42174808
chr10	42193069	42193326
chr10	42321329	42321740
chr10	42363453	42363786
chr10	42413364	42413620
chr10	42429679	42429987
chr10	42632994	42633310
chr10	42772304	42772620
chr10	42911624	42911861
chr10	43035045	43035366
chr10	43140543	43140749
chr10	43155638	43155968
chr10	43188534	43188769
chr10	43195160	43195665
chr10	43261611	43261889
chr10	43269262	43269582
chr10	43280543	43281479
chr10	43425821	43426007
chr10	43542513	43542714
chr10	43547164	43547486
chr10	43565306	43565644
chr10	43827501	43827791
chr10	43879958	43880216
chr10	43938926	43939237
chr10	44481144	44481521
chr10	44852243	44852663
chr10	45037256	45037446
chr10	45055204	45055441
chr10	45064149	45064542
chr10	45087221	45087480
chr10	45205438	45205725
chr10	45231681	45231888
chr10	46836754	46837063
chr10	46976989	46977231
chr10	47019964	47020274
chr10	49583654	49583930
chr10	50090467	50090718
chr10	50336707	50337000
chr10	50447934	50448142
chr10	50601330	50601620
chr10	50635453	50635794
chr10	50973227	50973773
chr10	51142331	51142584
chr10	51389234	51389439
chr10	51671870	51672154
chr10	51848673	51849144
chr10	51864082	51864335
chr10	51902769	51903005
chr10	51917178	51917468
chr10	51996955	51997410
chr10	52046300	52046512
chr10	52063180	52063458
chr10	52073020	52073343
chr10	52142920	52143258
chr10	52313239	52313490
chr10	52766495	52766816
chr10	53061125	53061451
chr10	53181285	53181526
chr10	53349055	53349325
chr10	53374135	53374375
chr10	53526542	53526828
chr10	53579067	53579367
chr10	54445601	54445887
chr10	55096744	55096979
chr10	56258084	56258379
chr10	56560564	56560912
chr10	56608884	56609230
chr10	57124680	57124898
chr10	57303764	57304111
chr10	57314908	57315075
chr10	57350431	57350675
chr10	57712365	57712595
chr10	57721312	57721623
chr10	57775706	57776009
chr10	57851386	57851731
chr10	57915603	57915865
chr10	57958356	57958708
chr10	57960682	57960968
chr10	58003421	58003758
chr10	58011567	58011888
chr10	58111538	58111859
chr10	58511137	58511456
chr10	58583997	58584244
chr10	58751784	58752243
chr10	58841414	58841833
chr10	58876344	58876833
chr10	59172943	59173366
chr10	59250230	59250962
chr10	59292690	59292989
chr10	59393013	59393285
chr10	59429509	59430019
chr10	59482127	59482367
chr10	59483027	59483380
chr10	59485823	59486211
chr10	59586844	59587279
chr10	59598840	59599113
chr10	59644225	59644474
chr10	59650835	59651111
chr10	59709265	59709725
chr10	59714506	59714767
chr10	59905894	59906215
chr10	59921726	59922119
chr10	60078706	60079003
chr10	60084234	60084600
chr10	60095013	60095314
chr10	60186181	60186429
chr10	60303677	60304190
chr10	60482369	60482683
chr10	60550447	60550733
chr10	60635292	60635699
chr10	60682145	60682437
chr10	60762813	60763096
chr10	60769616	60769872
chr10	60777845	60778039
chr10	60781374	60781730
chr10	60789212	60789426
chr10	60801970	60802351
chr10	60818865	60819243
chr10	60865252	60865626
chr10	60866271	60866518
chr10	60878004	60878242
chr10	60880212	60880532
chr10	60884413	60884663
chr10	60885857	60886368
chr10	60985313	60985722
chr10	61050090	61050343
chr10	61081338	61082055
chr10	61119916	61120228
chr10	61192995	61193238
chr10	61204693	61204920
chr10	61207814	61208295
chr10	61282790	61283190
chr10	61307294	61307524
chr10	61368880	61369215
chr10	61379872	61380249
chr10	61440770	61441124
chr10	61525582	61525943
chr10	61534155	61534430
chr10	61589767	61590295
chr10	61644486	61644846
chr10	61791680	61792199
chr10	61821651	61821924
chr10	61944288	61944559
chr10	61985946	61986290
chr10	62142584	62142985
chr10	62145818	62146237
chr10	62155883	62156217
chr10	62180114	62180326
chr10	62266840	62267196
chr10	62297742	62297996
chr10	62325257	62325574
chr10	62337675	62337978
chr10	62359501	62359703
chr10	62379599	62379989
chr10	62395129	62395460
chr10	62517349	62517709
chr10	62580408	62580653
chr10	62593250	62593651
chr10	62598484	62598735
chr10	62718589	62718795
chr10	62733036	62733454
chr10	62734473	62734816
chr10	62778985	62779276
chr10	62894165	62894339
chr10	62901690	62901883
chr10	63018780	63018999
chr10	63036924	63037336
chr10	63057949	63058326
chr10	63117399	63117635
chr10	63154863	63155074
chr10	63558849	63559126
chr10	63559365	63559674
chr10	63864296	63864604
chr10	64043071	64043321
chr10	64767774	64767979
chr10	64805340	64805607
chr10	65163966	65164189
chr10	65694619	65694906
chr10	65811201	65811489
chr10	66180767	66180983
chr10	66182594	66182831
chr10	66244790	66245109
chr10	66297743	66298066
chr10	66298551	66298738
chr10	66326800	66327285
chr10	66376380	66376693
chr10	66597140	66597399
chr10	66628794	66629045
chr10	66653139	66653339
chr10	66655101	66655445
chr10	66675045	66675480
chr10	66781826	66782056
chr10	66810961	66811191
chr10	67231627	67231888
chr10	67338818	67339062
chr10	67384594	67384902
chr10	67386796	67387187
chr10	67394143	67394403
chr10	67406356	67406661
chr10	67506222	67506512
chr10	67513670	67514067
chr10	67515096	67515406
chr10	67521179	67521429
chr10	67550559	67550835
chr10	67618806	67619214
chr10	67634780	67635068
chr10	67772849	67773122
chr10	67813486	67813978
chr10	67819842	67820075
chr10	67821932	67822177
chr10	67917337	67917574
chr10	68074429	68075001
chr10	68088553	68088824
chr10	68141480	68141783
chr10	68248450	68248673
chr10	68273792	68274109
chr10	68466902	68467221
chr10	68512633	68512911
chr10	68577204	68577464
chr10	68837930	68838313
chr10	68974085	68974355
chr10	68985983	68986337
chr10	68994345	68994786
chr10	69044337	69044585
chr10	69070420	69070726
chr10	69101920	69102210
chr10	69103475	69103692
chr10	69138711	69138933
chr10	69142890	69143131
chr10	69255879	69256238
chr10	69315176	69315474
chr10	69430217	69430529
chr10	69466882	69467156
chr10	69476720	69477103
chr10	69516219	69516464
chr10	69527188	69527491
chr10	69532166	69532416
chr10	69606493	69606818
chr10	69619212	69619521
chr10	69628656	69628970
chr10	69629882	69630128
chr10	69658553	69658862
chr10	69718361	69718646
chr10	69731565	69731919
chr10	69739523	69739752
chr10	69742090	69742492
chr10	69765939	69766304
chr10	69767623	69767840
chr10	69850533	69850863
chr10	69939079	69939430
chr10	69970582	69970988
chr10	70338812	70339250
chr10	70379370	70379881
chr10	70460951	70461236
chr10	70556106	70556441
chr10	70562742	70563000
chr10	70564177	70564402
chr10	70585429	70585648
chr10	70586771	70587071
chr10	70634256	70634538
chr10	70636760	70636971
chr10	70642946	70643180
chr10	70768895	70769247
chr10	70795170	70795422
chr10	70805214	70805502
chr10	70874565	70874892
chr10	70884457	70884722
chr10	70891147	70891576
chr10	70893460	70893780
chr10	70893999	70894307
chr10	70918167	70918468
chr10	71061388	71061611
chr10	71297836	71298087
chr10	71519552	71519804
chr10	71521419	71521724
chr10	71582231	71582538
chr10	71767298	71767598
chr10	72473690	72473991
chr10	72474687	72475020
chr10	72566458	72566899
chr10	73027015	73027323
chr10	73107603	73107921
chr10	73727305	73727539
chr10	73734414	73734630
chr10	74213692	74213974
chr10	74392341	74392654
chr10	74397721	74398241
chr10	74429770	74430071
chr10	74452646	74452907
chr10	74623272	74623562
chr10	74655715	74655971
chr10	74880151	74880440
chr10	74905748	74906145
chr10	75029165	75029438
chr10	75029545	75029969
chr10	75039134	75039423
chr10	75055739	75055971
chr10	75067832	75068330
chr10	75166361	75166598
chr10	75220555	75220894
chr10	75236203	75236520
chr10	75281420	75281715
chr10	75299894	75300403
chr10	75387126	75387387
chr10	75470573	75470884
chr10	75511169	75511480
chr10	75525234	75525535
chr10	75581512	75581847
chr10	75599125	75599361
chr10	75666818	75667123
chr10	75692354	75692841
chr10	75700739	75701018
chr10	75738261	75738516
chr10	75872492	75872774
chr10	75903071	75903333
chr10	76013227	76013536
chr10	76195982	76196354
chr10	76291721	76292070
chr10	76527436	76527807
chr10	76583304	76583691
chr10	76598209	76598592
chr10	76600482	76600788
chr10	76721713	76721946
chr10	76737066	76737276
chr10	76744858	76745249
chr10	76905158	76905420
chr10	76955702	76955961
chr10	77020452	77020734
chr10	77066772	77067192
chr10	77068587	77068785
chr10	77079023	77079239
chr10	77187603	77187910
chr10	77191042	77191358
chr10	77215163	77215435
chr10	77216294	77216638
chr10	77278161	77278593
chr10	77311991	77312255
chr10	77345384	77345642
chr10	77434923	77435289
chr10	77462483	77462771
chr10	77472468	77472771
chr10	77532347	77532574
chr10	77710712	77711057
chr10	77715889	77716090
chr10	77740640	77740900
chr10	77819771	77820032
chr10	77841312	77841585
chr10	77924584	77924895
chr10	77944550	77944925
chr10	78145045	78145307
chr10	78264328	78264619
chr10	78965657	78965885
chr10	78990930	78991171
chr10	78995827	78996151
chr10	79119852	79120101
chr10	79121555	79121956
chr10	79123106	79123355
chr10	79134879	79135106
chr10	79138154	79138406
chr10	79154973	79155224
chr10	79162135	79162391
chr10	79167486	79167773
chr10	79198158	79198401
chr10	79235153	79235404
chr10	79254565	79254905
chr10	79258745	79259006
chr10	79273600	79273898
chr10	79283551	79283913
chr10	79299741	79299999
chr10	79333890	79334223
chr10	79454269	79454717
chr10	79455569	79455839
chr10	79458069	79458335
chr10	79483628	79483970
chr10	79526652	79526996
chr10	79538156	79538385
chr10	79642007	79642320
chr10	79674173	79674570
chr10	79732489	79732697
chr10	79751475	79751889
chr10	79752440	79752722
chr10	79832710	79833078
chr10	79839504	79839887
chr10	79846261	79846562
chr10	79887829	79888176
chr10	80001435	80001863
chr10	80076682	80076942
chr10	80201433	80201828
chr10	80277603	80277933
chr10	80409371	80409889
chr10	80423512	80423823
chr10	80551574	80551857
chr10	80559350	80559607
chr10	80591280	80591544
chr10	80606164	80606484
chr10	80642325	80642537
chr10	80653609	80653933
chr10	80672869	80673301
chr10	80687891	80688108
chr10	80740381	80740738
chr10	80744589	80745214
chr10	80802213	80802420
chr10	80807242	80807588
chr10	80879505	80879781
chr10	80908284	80908601
chr10	80921503	80921706
chr10	80956474	80956685
chr10	80976604	80976933
chr10	81018994	81019453
chr10	81071011	81071346
chr10	81106495	81106918
chr10	81204561	81204809
chr10	81363630	81363900
chr10	81759194	81759482
chr10	81818244	81818490
chr10	81824688	81825076
chr10	82052444	82052827
chr10	82130106	82130459
chr10	82245220	82245490
chr10	82254529	82254823
chr10	82258167	82258436
chr10	82378011	82378353
chr10	82389362	82389627
chr10	82424040	82424358
chr10	82771402	82771689
chr10	82817150	82817427
chr10	82999207	82999570
chr10	83001899	83002234
chr10	83151094	83151334
chr10	83160999	83161250
chr10	83187354	83187768
chr10	83201814	83202083
chr10	83459269	83459568
chr10	83629327	83629557
chr10	83854776	83855067
chr10	84061053	84061300
chr10	84092360	84092611
chr10	84277285	84277582
chr10	84408436	84408865
chr10	84435336	84435584
chr10	84450316	84450649
chr10	84501645	84501961
chr10	84797680	84797913
chr10	84804619	84804962
chr10	84812268	84812545
chr10	84917313	84917539
chr10	85005769	85006067
chr10	85017942	85018340
chr10	85024153	85024531
chr10	85047582	85047863
chr10	85061924	85062171
chr10	85140839	85141126
chr10	85194664	85195110
chr10	85519105	85519411
chr10	85756708	85756957
chr10	86018633	86018914
chr10	86063659	86063936
chr10	86072796	86073072
chr10	86095931	86096144
chr10	86286860	86287187
chr10	86292322	86292656
chr10	86326236	86326569
chr10	86415480	86415763
chr10	86975905	86976138
chr10	87539184	87539561
chr10	87628860	87629260
chr10	87674450	87674700
chr10	87828344	87828616
chr10	87954337	87954629
chr10	87976520	87976834
chr10	87996632	87996951
chr10	88012990	88013322
chr10	88240380	88240623
chr10	88306989	88307194
chr10	88328868	88329101
chr10	88347596	88347983
chr10	88584196	88584466
chr10	88685415	88685651
[truncated: 18,071 more rows]
