# Supplementary material for: YY1 and CTCF orchestrate a 3D chromatin looping switch during early neural lineage commitment
Source: HighWire-hosted journal article supplement (doi:10.1101/gr.215160.116), 2017-05-23
Supplement: Supplemental_Table_S11.xlsx [file Supplemental_Table_S11.xlsx]

## Sheet: Constit_E-8_Galaxy421-(Merged_C
Beagan et al. 2017
Table S11, Significant CTCF Peaks present in the ES 2i, ES serum, and NPC cellular states (classified as 'constitutive')
#chr	start	end
chr1	4322604	4322910
chr1	4336243	4336667
chr1	4372942	4373230
chr1	4506639	4507015
chr1	4758427	4758868
chr1	4759884	4760428
chr1	4770168	4770568
chr1	5060337	5060675
chr1	5093280	5093574
chr1	5894976	5895226
chr1	6125196	6125520
chr1	6262371	6262703
chr1	6391664	6391932
chr1	6396387	6396818
chr1	6400218	6400461
chr1	6473385	6473729
chr1	6849122	6849496
chr1	7000327	7000561
chr1	7194753	7195185
chr1	7208988	7209331
chr1	7386936	7387770
chr1	7388237	7388682
chr1	7533553	7533929
chr1	8668809	8669149
chr1	9091024	9091297
chr1	9531286	9531776
chr1	9539137	9539359
chr1	9563258	9563664
chr1	9611565	9611828
chr1	9685625	9685909
chr1	9686953	9687255
chr1	9693176	9693522
chr1	9762859	9763215
chr1	9997290	9997763
chr1	10029536	10029909
chr1	10079607	10080073
chr1	10478255	10478651
chr1	10749602	10750070
chr1	10825777	10826086
chr1	11130092	11130324
chr1	11223955	11224300
chr1	11404122	11404547
chr1	11456440	11456767
chr1	11555453	11555807
chr1	11647722	11648122
chr1	12018212	12018524
chr1	12826913	12827265
chr1	12854184	12854520
chr1	13040198	13040657
chr1	13042078	13042532
chr1	13124370	13124872
chr1	13141062	13141581
chr1	13362929	13363279
chr1	13490595	13490998
chr1	13521579	13522004
chr1	13579879	13580267
chr1	13649933	13650155
chr1	13696312	13696850
chr1	13774443	13774828
chr1	13779316	13779666
chr1	14719164	14719478
chr1	14730217	14730471
chr1	14997676	14998094
chr1	15611986	15612349
chr1	15673763	15674098
chr1	15782019	15782460
chr1	15865220	15865443
chr1	15892486	15892927
chr1	16095639	16096043
chr1	16295015	16295326
chr1	16423502	16423907
chr1	16430246	16430659
chr1	16509782	16510022
chr1	16788382	16788809
chr1	17113526	17113863
chr1	17153631	17153969
chr1	17970699	17971034
chr1	18002935	18003544
chr1	18096276	18097190
chr1	18121808	18122083
chr1	18278987	18279308
chr1	18350038	18350419
chr1	18966833	18967183
chr1	19169108	19169454
chr1	19195661	19196648
chr1	20301619	20301916
chr1	20440253	20440545
chr1	20503791	20504167
chr1	20544499	20545025
chr1	20602758	20603279
chr1	20690099	20690464
chr1	20728630	20728882
chr1	20791874	20792125
chr1	20881052	20881346
chr1	20923545	20923899
chr1	20929101	20929478
chr1	21091317	21091704
chr1	21151904	21152373
chr1	21156258	21156685
chr1	21203584	21203991
chr1	21208437	21208933
chr1	21261571	21261793
chr1	21266268	21266620
chr1	21334399	21334769
chr1	21401230	21401721
chr1	21451116	21451591
chr1	21951383	21951736
chr1	22095619	22095934
chr1	22259034	22259480
chr1	22376473	22376798
chr1	22494123	22494559
chr1	22611251	22611572
chr1	23068858	23069167
chr1	23175350	23175705
chr1	23293609	23294014
chr1	23331103	23331395
chr1	23712361	23712783
chr1	23769556	23770040
chr1	23799563	23800030
chr1	23833850	23834331
chr1	23912946	23913263
chr1	24141745	24142092
chr1	24143964	24144349
chr1	24178306	24178683
chr1	24255951	24256335
chr1	24307580	24307879
chr1	24309431	24309934
chr1	24374405	24374848
chr1	24385322	24385642
chr1	24640585	24640951
chr1	24685185	24685655
chr1	24776462	24776839
chr1	24958163	24958504
chr1	25567184	25567623
chr1	25883612	25883986
chr1	25941961	25942262
chr1	30201937	30202187
chr1	30641736	30642092
chr1	30757266	30757594
chr1	30835404	30835990
chr1	30837044	30837453
chr1	30977623	30977996
chr1	31210831	31211197
chr1	31266974	31267331
chr1	33021859	33022188
chr1	33079770	33080049
chr1	33622579	33623037
chr1	33719967	33720348
chr1	33727232	33727472
chr1	33729377	33729685
chr1	33741191	33741669
chr1	33796114	33796739
chr1	33799688	33800403
chr1	33949625	33950200
chr1	33964306	33964677
chr1	34021480	34021830
chr1	34023167	34023656
chr1	34062457	34062819
chr1	34067882	34068175
chr1	34118014	34118262
chr1	34221527	34221956
chr1	34246789	34247242
chr1	34258366	34258713
chr1	34275095	34275665
chr1	34466747	34467099
chr1	34519748	34519996
chr1	34567930	34568403
chr1	34640863	34641228
chr1	34659133	34659584
chr1	34699243	34699745
chr1	34757570	34757957
chr1	34795143	34795653
chr1	34924025	34924560
chr1	34948413	34948728
chr1	34953820	34954120
chr1	35442192	35442753
chr1	35444985	35445463
chr1	35535162	35535591
chr1	35783487	35783872
chr1	35896258	35896768
chr1	36121651	36122119
chr1	36191444	36191796
chr1	36201928	36202378
chr1	36206320	36206618
chr1	36309584	36310182
chr1	36311478	36311863
chr1	36334097	36334557
chr1	36336052	36336576
chr1	36380717	36381227
chr1	36549341	36549575
chr1	36553677	36553942
chr1	36558134	36558601
chr1	36568122	36568685
chr1	36570553	36571007
chr1	36603926	36604453
chr1	36613848	36614367
chr1	36691761	36692207
chr1	36721376	36721616
chr1	36740883	36741355
chr1	36766138	36766374
chr1	36794082	36794552
chr1	36801399	36801849
chr1	36803301	36803707
chr1	36841355	36841895
chr1	36960983	36961226
chr1	37251438	37251762
chr1	37307487	37307999
chr1	37329294	37329704
chr1	37458498	37458920
chr1	37476193	37476774
chr1	37505198	37505608
chr1	37691466	37691865
chr1	37696037	37696442
chr1	37735238	37735688
chr1	37747534	37747854
chr1	37765188	37765472
chr1	37776563	37776991
chr1	37923937	37924367
chr1	37948259	37948559
chr1	37960057	37960368
chr1	38042550	38043042
chr1	38054687	38055024
chr1	38186781	38187193
chr1	38242300	38242892
chr1	38259670	38259983
chr1	38309499	38309947
chr1	38449817	38450109
chr1	38824700	38825075
chr1	38826676	38827169
chr1	38844328	38844721
chr1	38845736	38846167
chr1	38856253	38856584
chr1	38891730	38892121
chr1	38912929	38913451
chr1	38919030	38919433
chr1	38991543	38991898
chr1	38993610	38994080
chr1	39057945	39058392
chr1	39067522	39067893
chr1	39397486	39397896
chr1	39448986	39449506
chr1	39561168	39561460
chr1	39579400	39579817
chr1	39584194	39584681
chr1	39587062	39587526
chr1	39671653	39672146
chr1	39707597	39708059
chr1	39742706	39743107
chr1	39818236	39818561
chr1	39968392	39968723
chr1	39993331	39993753
chr1	40057770	40058137
chr1	40152398	40152820
chr1	40172127	40172488
chr1	40173244	40173578
chr1	40350798	40351069
chr1	40435614	40435979
chr1	40436838	40437289
chr1	40601493	40601844
chr1	40636617	40637011
chr1	40714832	40715248
chr1	40825479	40825843
chr1	40854122	40854624
chr1	40859592	40860027
chr1	40901463	40901974
chr1	40935883	40936288
chr1	40944447	40944785
chr1	41058489	41058732
chr1	41209400	41209727
chr1	41321064	41321498
chr1	41867228	41867488
chr1	42295267	42295604
chr1	42741652	42741994
chr1	42748072	42748442
chr1	42771494	42771755
chr1	42775489	42775720
chr1	42971896	42972189
chr1	43122783	43123159
chr1	43167388	43167828
chr1	43169797	43170085
chr1	43196367	43196862
chr1	43321256	43321665
chr1	43326516	43326884
chr1	43356302	43356641
chr1	43692627	43692924
chr1	43795019	43795617
chr1	43816936	43817384
chr1	43955809	43956225
chr1	43959610	43960052
chr1	44098608	44099068
chr1	44121481	44121891
chr1	44176664	44177002
chr1	44285880	44286235
chr1	44494705	44494990
chr1	44608239	44608699
chr1	44798183	44798399
chr1	44802551	44802890
chr1	45370829	45371065
chr1	45488640	45489060
chr1	45684733	45685055
chr1	45822980	45823367
chr1	45873680	45874142
chr1	45882020	45882357
chr1	46079184	46079546
chr1	46473788	46474153
chr1	46637259	46637455
chr1	46906597	46906975
chr1	46971149	46971709
chr1	46996196	46996528
chr1	47027289	47027761
chr1	47334595	47334928
chr1	47866388	47866694
chr1	50983861	50984302
chr1	51019114	51019491
chr1	51390768	51391212
chr1	51515870	51516200
chr1	51522192	51522482
chr1	51523248	51523624
chr1	51653852	51654389
chr1	51657236	51657652
chr1	51672359	51672893
chr1	51701281	51701677
chr1	51725800	51726065
chr1	51972732	51973036
chr1	52001674	52002145
chr1	52055413	52055781
chr1	52060946	52061547
chr1	52143155	52143398
chr1	52155733	52156156
chr1	52170593	52171070
chr1	52203393	52203787
chr1	52324448	52324863
chr1	52359487	52359860
chr1	52363769	52364161
chr1	52687253	52687753
chr1	52705001	52705306
chr1	52805140	52805511
chr1	52910931	52911214
chr1	53011980	53012378
chr1	53089461	53089794
chr1	53109914	53110394
chr1	53329565	53329869
chr1	53409555	53409836
chr1	53772307	53772693
chr1	53947235	53947577
chr1	53965952	53966352
chr1	53984459	53984852
chr1	54095990	54096318
chr1	54389857	54390178
chr1	54438031	54438856
chr1	54722721	54723219
chr1	54763383	54764006
chr1	54889686	54889919
chr1	55015422	55015803
chr1	55069387	55069774
chr1	55237072	55237367
chr1	55242638	55242903
chr1	55249592	55250110
chr1	55296058	55296530
chr1	55357958	55358260
chr1	55419979	55420744
chr1	55439968	55440446
chr1	55461228	55461640
chr1	55486614	55486886
chr1	55793248	55793579
chr1	55812532	55812946
chr1	55895005	55895546
chr1	55931036	55931957
chr1	55943291	55943608
chr1	55947604	55947888
chr1	56017135	56017546
chr1	57033881	57034330
chr1	57048554	57048788
chr1	57262499	57262850
chr1	57326613	57326960
chr1	57395877	57396375
chr1	57450794	57451433
chr1	57480565	57480849
chr1	57485741	57486120
chr1	58006124	58006408
chr1	58026673	58027285
chr1	58087973	58088406
chr1	58136548	58136872
chr1	58169627	58170055
chr1	58213593	58213931
chr1	58328061	58328389
chr1	58353136	58353555
chr1	58619307	58619693
chr1	58734497	58734807
chr1	58754530	58754806
chr1	58803767	58804128
chr1	58826899	58827160
chr1	58954447	58954808
chr1	59050698	59050930
chr1	59066134	59066375
chr1	59124903	59125152
chr1	59199630	59200084
chr1	59294806	59295128
chr1	59304406	59304863
chr1	59373615	59373940
chr1	59540604	59540931
chr1	59641461	59641951
chr1	59660854	59661177
chr1	59670458	59671144
chr1	59680153	59680542
chr1	59758627	59759082
chr1	59776651	59777394
chr1	59940539	59941027
chr1	60024196	60024476
chr1	60052498	60052880
chr1	60215341	60215571
chr1	60253566	60254095
chr1	60917474	60917868
chr1	60925251	60925799
chr1	61011750	61012096
chr1	61017967	61018301
chr1	61112008	61112422
chr1	61196045	61196362
chr1	61237914	61238358
chr1	61354810	61355198
chr1	61433902	61434265
chr1	61817776	61818200
chr1	61971582	61971840
chr1	62013720	62014109
chr1	62743572	62743890
chr1	62747608	62748153
chr1	62764533	62764823
chr1	62769096	62769508
chr1	62829910	62830096
chr1	62832787	62833250
chr1	62842108	62842773
chr1	62866731	62867100
chr1	62976086	62976674
chr1	63010908	63011242
chr1	63013574	63013845
chr1	63030979	63031409
chr1	63032867	63033251
chr1	63135211	63135633
chr1	63161119	63161383
chr1	63227369	63228051
chr1	63228820	63229565
chr1	63450184	63450521
chr1	63704552	63704982
chr1	63706158	63706449
chr1	63715370	63715711
chr1	64492629	64492985
chr1	64494699	64495208
chr1	64663969	64664589
chr1	64751807	64752197
chr1	64756441	64756833
chr1	64764134	64764501
chr1	64782451	64782818
chr1	64784029	64784309
chr1	64965426	64965861
chr1	65032830	65033125
chr1	65056672	65057329
chr1	65092893	65093316
chr1	65122224	65122542
chr1	65158577	65159047
chr1	65224786	65225212
chr1	65225744	65226127
chr1	65226242	65226937
chr1	65329362	65329738
chr1	65358756	65359105
chr1	65434831	65435308
chr1	65701098	65701355
chr1	66146496	66146699
chr1	66151175	66151432
chr1	66702385	66702690
chr1	66885058	66885472
chr1	66942300	66943021
chr1	66987491	66987950
chr1	67039354	67039654
chr1	67060839	67061154
chr1	67108015	67108447
chr1	67190482	67190869
chr1	67227732	67228169
chr1	67264914	67265168
chr1	67686952	67687304
chr1	68153085	68153463
chr1	69185477	69185835
chr1	69211827	69212131
chr1	69288299	69288667
chr1	69735610	69735986
chr1	69831608	69832061
chr1	69836835	69837179
chr1	70174647	70174957
chr1	70316721	70317055
chr1	71083511	71083935
chr1	71336066	71336522
chr1	71552369	71552974
chr1	71578278	71578648
chr1	72170275	72170603
chr1	72188109	72188845
chr1	72258790	72259364
chr1	72266595	72266936
chr1	72279216	72279606
chr1	72353067	72353781
chr1	72360083	72360645
chr1	72427157	72427441
chr1	72621773	72622125
chr1	72657048	72657347
chr1	72763481	72763917
chr1	72765347	72765820
chr1	72901424	72901927
chr1	72912379	72912837
chr1	72924452	72924775
chr1	73321166	73321403
chr1	73665173	73665436
chr1	73872906	73873247
chr1	73909389	73909962
chr1	73948078	73948643
chr1	73948933	73949320
chr1	73972853	73973171
chr1	74033238	74033599
chr1	74042875	74043321
chr1	74123870	74124279
chr1	74129271	74129886
chr1	74144888	74145204
chr1	74171631	74172143
chr1	74178632	74178869
chr1	74185954	74186439
chr1	74242546	74242934
chr1	74252262	74252835
chr1	74333707	74334182
chr1	74359737	74360256
chr1	74408418	74408821
chr1	74433163	74433547
chr1	74437098	74437971
chr1	74443949	74444315
chr1	74444754	74445124
chr1	74499261	74499638
chr1	74506859	74507220
chr1	74690371	74690819
chr1	74708214	74708472
chr1	74759671	74759927
chr1	74795294	74795950
chr1	74806303	74806793
chr1	74809672	74810063
chr1	74822388	74822945
chr1	74830745	74831496
chr1	74834424	74834813
chr1	74849561	74850096
chr1	74852857	74853225
chr1	74854562	74855285
chr1	74927285	74927716
chr1	74939863	74940570
chr1	74941409	74941859
chr1	74948170	74948647
chr1	74973291	74973684
chr1	74995158	74995894
chr1	75010983	75011451
chr1	75046954	75047491
chr1	75063402	75064133
chr1	75098680	75099067
chr1	75121000	75121450
chr1	75139201	75139658
chr1	75231271	75231587
chr1	75248150	75248637
chr1	75250758	75251259
chr1	75287157	75287570
chr1	75314427	75314860
chr1	75339412	75339848
chr1	75367995	75368376
chr1	75395284	75395677
chr1	75410315	75410756
chr1	75422245	75422945
chr1	75442257	75442709
chr1	75453272	75453951
chr1	75464119	75464645
chr1	75473689	75474394
chr1	75491655	75492195
chr1	75543171	75543506
chr1	75555920	75556580
chr1	75594207	75594607
chr1	75649108	75649427
chr1	75650154	75650559
chr1	75922316	75922730
chr1	77512760	77513283
chr1	77558386	77558713
chr1	77586047	77586420
chr1	77892862	77893192
chr1	77939676	77940112
chr1	77968880	77969494
chr1	77975258	77975691
chr1	78005354	78005695
chr1	78416152	78416554
chr1	78451231	78451663
chr1	78521684	78522363
chr1	78533417	78533825
chr1	78721059	78721416
chr1	79679579	79679939
chr1	79779081	79779379
chr1	79783115	79783422
chr1	80176762	80177177
chr1	80177394	80177962
chr1	80240751	80240988
chr1	80405115	80405488
chr1	80501394	80501699
chr1	80509200	80509451
chr1	80512433	80512820
chr1	80724810	80725061
chr1	80826998	80827259
chr1	81283728	81284062
chr1	81297384	81297651
chr1	81298309	81298610
chr1	81306699	81306992
chr1	81313056	81313550
chr1	81513156	81513530
chr1	82290614	82291125
chr1	82429984	82430398
chr1	82472823	82473246
chr1	82550920	82551241
chr1	82568385	82568667
chr1	82638129	82638654
chr1	82756114	82756501
chr1	82783898	82784259
chr1	82800167	82800643
chr1	82835745	82836198
chr1	82984318	82984729
chr1	83061191	83061776
chr1	83072692	83073061
chr1	83183740	83184129
chr1	83219699	83219927
chr1	83713675	83714008
chr1	83723784	83724085
chr1	83733045	83733327
chr1	83742589	83742950
chr1	83807803	83808218
chr1	84125116	84125413
chr1	84150467	84150900
chr1	84279673	84279945
chr1	84283361	84283768
chr1	84466940	84467508
chr1	84578405	84578845
chr1	84692678	84693055
chr1	84693520	84694363
chr1	84730319	84730786
chr1	84881801	84882159
chr1	84930041	84930455
chr1	85111379	85111767
chr1	85319829	85320127
chr1	87633104	87633434
chr1	87689741	87690127
chr1	87749823	87750366
chr1	87792092	87792432
chr1	87831986	87832413
chr1	87904433	87904866
chr1	87956034	87956428
chr1	87960704	87961115
chr1	88075323	88075961
chr1	88110661	88111143
chr1	88210305	88210678
chr1	88235948	88236498
chr1	88245418	88245693
chr1	88260283	88260730
chr1	88268520	88268864
chr1	88285750	88286294
chr1	88301411	88301941
chr1	88312162	88313332
chr1	88326495	88326977
chr1	88335184	88335392
chr1	88336946	88337484
chr1	88396475	88396997
chr1	88397540	88398595
chr1	88400706	88401096
chr1	88405935	88406347
chr1	88421805	88422295
chr1	88424605	88425489
chr1	88428897	88429370
chr1	88495015	88495509
chr1	88510851	88511272
chr1	88514991	88515424
chr1	88546806	88547482
chr1	88566070	88566417
chr1	88595334	88595653
chr1	88864941	88865162
chr1	88937713	88938059
chr1	88938626	88939056
chr1	88967294	88967751
chr1	88995034	88995590
chr1	89008354	89008578
chr1	89070752	89071254
chr1	89072325	89072668
chr1	89081015	89081828
chr1	89083516	89084123
chr1	89114562	89115011
chr1	89142542	89143152
chr1	89189474	89189787
chr1	89223726	89223981
chr1	89276560	89276849
chr1	89315185	89315648
chr1	89343897	89344457
chr1	89438204	89438526
chr1	89464997	89465396
chr1	89504916	89505509
chr1	89560618	89561050
chr1	89618062	89618356
chr1	89652354	89652632
chr1	89662710	89663204
chr1	89819271	89819539
chr1	89833106	89833440
chr1	90016960	90017598
chr1	90018035	90018428
chr1	90040545	90041338
chr1	90041801	90042236
chr1	90174061	90174582
chr1	90181407	90181909
chr1	90184119	90184776
chr1	90186425	90186989
chr1	90215199	90215428
chr1	90253969	90254459
chr1	90321170	90321619
chr1	90330669	90331017
chr1	90341859	90342383
chr1	90353202	90353660
chr1	90362362	90362627
chr1	90458936	90459335
chr1	90601685	90602174
chr1	90602395	90602845
chr1	90639038	90639349
chr1	90641663	90642222
chr1	90648843	90649146
chr1	90653203	90653532
chr1	91088004	91088652
chr1	91092728	91093072
chr1	91103888	91104215
chr1	91131851	91132197
chr1	91219623	91219993
chr1	91239418	91239751
chr1	91420971	91421430
chr1	91422450	91422822
chr1	91477889	91478130
chr1	91503156	91503639
chr1	91524251	91524629
chr1	91528401	91528729
chr1	91540394	91540694
chr1	91543153	91543593
chr1	91572730	91573330
chr1	91654034	91654550
chr1	91755779	91756268
chr1	91839775	91840701
chr1	91923529	91923899
chr1	91947994	91948390
chr1	91957159	91957471
chr1	92100340	92100721
chr1	92101903	92102175
chr1	92187870	92188117
chr1	92484921	92485334
chr1	92487460	92487786
chr1	92489389	92489917
chr1	92547249	92547634
chr1	92736857	92737231
chr1	92746425	92746845
chr1	92802861	92803325
chr1	92825054	92825444
chr1	92853281	92853705
chr1	92869806	92870219
chr1	92995432	92995911
chr1	93075550	93075965
chr1	93107741	93108108
chr1	93135741	93136060
chr1	93148628	93148966
chr1	93243328	93243896
chr1	93262678	93263259
chr1	93277047	93277474
chr1	93325169	93325576
chr1	93355991	93356263
chr1	93379815	93380291
chr1	93420332	93420722
chr1	93470827	93471118
chr1	93497265	93497651
chr1	93586170	93586479
chr1	93651720	93652092
chr1	93771188	93771733
chr1	93793694	93794012
chr1	93810401	93810846
chr1	93858809	93859195
chr1	93865606	93865992
chr1	94074981	94075226
chr1	94256843	94257371
chr1	94350206	94350765
chr1	94417815	94418265
chr1	94507578	94507975
chr1	94511094	94511427
chr1	94544360	94544822
chr1	94545294	94545788
chr1	94593377	94593877
chr1	94730527	94730988
chr1	94791595	94792051
chr1	94803405	94803819
chr1	94807144	94807499
chr1	94853220	94853575
chr1	94907210	94907668
chr1	94910934	94911500
chr1	94977497	94977910
chr1	95025297	95025728
chr1	95070952	95071386
chr1	95120527	95120949
chr1	95403692	95404109
chr1	95565262	95565584
chr1	95623548	95624064
chr1	95700129	95700648
chr1	95793962	95794309
chr1	95863068	95863411
chr1	95908233	95908550
chr1	95931447	95931979
chr1	95975637	95976075
chr1	96036018	96036359
chr1	97658784	97659174
chr1	98698280	98698629
chr1	98743217	98743632
chr1	98915574	98915917
chr1	98935172	98935461
chr1	99585325	99585759
chr1	99699187	99699475
chr1	99968601	99969040
chr1	100075676	100076076
chr1	100246931	100247349
chr1	105695935	105696252
chr1	105883452	105883807
chr1	106506004	106506378
chr1	106841384	106841735
chr1	106882751	106883159
chr1	106989071	106989431
chr1	107527116	107527451
chr1	107556646	107556959
chr1	107577194	107577561
chr1	107607730	107608317
chr1	107777664	107777890
chr1	107787672	107788019
chr1	107933491	107934029
chr1	107967807	107968198
chr1	108067688	108068084
chr1	108243406	108243649
chr1	108286377	108286704
chr1	108292118	108292580
chr1	108321655	108322443
chr1	108408147	108408564
chr1	108439370	108439659
chr1	108441457	108441772
chr1	108525398	108525655
chr1	108608969	108609217
chr1	108613871	108614168
chr1	108632148	108632548
chr1	108634637	108634999
chr1	108696589	108696807
chr1	108714994	108715257
chr1	108780447	108780781
chr1	108797993	108798510
chr1	108911095	108911470
chr1	109024073	109024401
chr1	109139784	109140207
chr1	109249640	109250004
chr1	109378112	109378452
chr1	109495075	109495444
chr1	109532547	109532799
chr1	110723827	110724185
chr1	113138981	113139285
chr1	113530721	113531016
chr1	113556714	113557250
chr1	113739313	113739675
chr1	113760539	113760959
chr1	114275147	114275664
chr1	114276481	114276994
chr1	114285358	114285868
chr1	114348271	114348585
chr1	114349031	114349302
chr1	114352636	114352965
chr1	115143918	115144296
chr1	118209864	118210265
chr1	118374227	118374654
chr1	119416144	119416541
chr1	120171750	120172079
chr1	120217225	120217804
chr1	120218008	120218631
chr1	120264534	120264866
chr1	120362547	120362987
chr1	120373446	120373907
chr1	120394912	120395272
chr1	120656195	120656527
chr1	120665345	120665795
chr1	120668894	120669296
chr1	120718711	120719204
chr1	120950118	120950513
chr1	120979083	120979648
chr1	120980152	120980648
chr1	120984029	120984464
chr1	120990239	120990711
chr1	121016468	121016974
chr1	121152730	121153048
chr1	121241887	121242409
chr1	121319253	121319550
chr1	121320109	121320590
chr1	121354797	121355243
chr1	121359959	121360375
chr1	121378172	121378562
chr1	121381015	121381479
chr1	121445202	121445709
chr1	121538994	121539242
chr1	121571459	121572000
chr1	121715239	121715594
chr1	121791488	121792047
chr1	121826394	121826680
chr1	121894295	121894534
chr1	121909686	121910139
chr1	121912813	121913117
chr1	121929482	121929985
chr1	121990014	121990478
chr1	121994838	121995326
chr1	122043715	122043945
chr1	122050837	122051196
chr1	122051924	122052308
chr1	122068389	122068759
chr1	122093685	122094167
chr1	122127891	122128230
chr1	122224220	122224639
chr1	122234588	122234924
chr1	122236821	122237143
chr1	122238996	122239353
chr1	122365486	122365836
chr1	122445925	122446182
chr1	122446833	122447152
chr1	122483042	122483434
chr1	122491136	122491452
chr1	122564367	122564707
chr1	122950343	122950656
chr1	123076965	123077272
chr1	123085478	123085902
chr1	123112412	123112772
chr1	123145672	123146022
chr1	123296866	123297172
chr1	123337551	123338029
chr1	123386867	123387197
chr1	123464408	123464852
chr1	123497595	123498089
chr1	124335946	124336352
chr1	125871173	125871611
chr1	125938139	125938691
chr1	125999701	126000094
chr1	126346745	126347037
chr1	126570947	126571337
chr1	126614695	126615042
chr1	127267298	127267786
chr1	127415672	127416066
chr1	127470835	127471221
chr1	127504041	127504414
chr1	127626234	127626599
chr1	127686360	127686731
chr1	127807149	127807417
chr1	128328291	128328605
chr1	128328889	128329190
chr1	128826319	128826594
chr1	128828287	128828719
chr1	128863022	128863305
chr1	128889802	128890257
chr1	128908463	128908783
chr1	129135350	129135678
chr1	129306130	129306517
chr1	129355642	129355932
chr1	129380853	129381766
chr1	129383734	129384179
chr1	129393327	129393632
chr1	129396797	129397211
chr1	129576390	129576764
chr1	129593135	129593458
chr1	129723876	129724292
chr1	130205710	130205930
chr1	130265317	130265661
chr1	130268727	130269043
chr1	130489032	130489402
chr1	130720800	130721205
chr1	130729161	130729499
chr1	130771832	130772222
chr1	130974901	130975227
chr1	131140943	131141359
chr1	131740021	131740376
chr1	131816017	131816276
chr1	132063748	132064206
chr1	132089287	132089610
chr1	132171127	132171364
chr1	132246904	132247264
chr1	132268759	132269127
chr1	132358929	132359339
chr1	132444473	132444797
chr1	132472567	132472857
chr1	132530496	132530998
chr1	132588453	132588803
chr1	132673278	132673596
chr1	132680756	132681040
chr1	132693463	132693948
chr1	132771502	132772082
chr1	132773449	132773923
chr1	132875978	132876448
chr1	132949849	132950229
chr1	132956738	132957173
chr1	133012483	133012844
chr1	133015664	133015922
chr1	133051985	133052438
chr1	133078194	133078583
chr1	133104103	133104476
chr1	133142363	133143303
chr1	133156943	133157360
chr1	133166734	133167192
chr1	133187243	133187596
chr1	133444944	133445243
chr1	133451738	133452069
chr1	133496879	133497297
chr1	133509967	133510298
chr1	133554529	133555060
chr1	133604926	133605328
chr1	133608914	133609381
chr1	133662092	133662555
chr1	133742932	133743273
chr1	133763580	133764061
chr1	133779387	133779821
chr1	133834150	133834766
chr1	133878110	133878618
chr1	133879380	133879841
chr1	133891497	133891964
chr1	133897075	133897450
chr1	133942926	133943339
chr1	134013160	134013702
chr1	134017674	134018114
chr1	134036751	134037109
chr1	134052345	134052696
chr1	134053905	134054352
chr1	134059190	134059596
chr1	134062454	134062891
chr1	134088727	134089086
chr1	134097068	134097357
chr1	134107486	134107960
chr1	134108680	134109150
chr1	134134120	134134534
chr1	134184726	134185081
chr1	134202781	134203331
chr1	134209250	134209582
chr1	134252395	134252741
chr1	134264123	134264531
chr1	134286906	134287202
chr1	134313905	134314289
chr1	134417336	134417843
chr1	134420492	134420905
chr1	134422332	134422782
chr1	134491169	134491633
chr1	134505598	134506237
chr1	134655085	134655955
chr1	134667952	134668438
chr1	134740217	134740641
chr1	134831495	134831804
chr1	134865026	134865816
chr1	134879136	134879674
chr1	134935990	134936436
chr1	134984210	134984652
chr1	134997982	134998381
chr1	135042448	135042970
chr1	135073913	135074363
chr1	135077523	135077940
chr1	135203321	135204385
chr1	135207868	135208102
chr1	135210909	135211289
chr1	135213215	135214075
chr1	135250100	135250493
chr1	135277279	135277672
chr1	135278605	135279057
chr1	135282037	135282522
chr1	135506808	135507270
chr1	135598479	135598784
chr1	135613014	135613449
chr1	135632777	135633277
chr1	135792925	135793299
chr1	135807907	135808408
chr1	135942509	135942849
chr1	135945363	135945742
chr1	135949728	135950161
chr1	136003352	136003739
chr1	136016691	136017187
chr1	136018798	136019247
chr1	136048173	136048696
chr1	136051238	136051595
chr1	136093075	136093409
chr1	136098611	136099057
chr1	136140716	136141165
chr1	136228381	136228893
chr1	136265279	136265765
chr1	136331954	136332307
chr1	136347588	136347905
chr1	136415232	136415583
chr1	136533333	136533597
chr1	136535142	136535460
chr1	136538134	136538499
chr1	136601329	136602062
chr1	136621880	136622129
chr1	136642290	136642577
chr1	136726199	136726495
chr1	136750871	136751331
chr1	136857263	136857551
chr1	136885933	136886360
chr1	137002485	137002967
chr1	137006629	137007090
chr1	137009132	137009722
chr1	137029000	137029353
chr1	137033109	137033474
chr1	137050979	137051442
chr1	137068567	137068909
chr1	137155660	137156056
chr1	137264734	137265188
chr1	137265648	137265963
chr1	137326988	137327331
chr1	137357724	137358006
chr1	137436880	137437308
chr1	137441332	137441665
chr1	137567029	137567465
chr1	137595942	137596366
chr1	137597214	137597584
chr1	137600893	137601254
chr1	137616057	137616485
chr1	137649407	137650258
chr1	137677807	137678343
chr1	137684388	137684693
chr1	137686348	137686910
chr1	137707809	137708263
chr1	137725534	137725895
chr1	137743569	137744284
chr1	137747366	137747615
chr1	137762096	137762483
chr1	137779288	137779698
chr1	137841326	137841690
chr1	137842235	137842655
chr1	137855061	137855451
chr1	137942360	137942755
chr1	137944020	137944439
chr1	137948048	137948353
chr1	137972735	137973134
chr1	138012572	138013137
chr1	138066725	138067232
chr1	138071642	138072312
chr1	138109420	138109845
chr1	138186454	138186784
chr1	138203072	138203314
chr1	138355439	138355966
chr1	138417916	138418287
chr1	138421444	138421903
chr1	138447420	138447901
chr1	138452529	138452783
chr1	138622554	138623117
chr1	138636122	138636708
chr1	138645723	138646333
chr1	139014443	139014834
chr1	139122098	139122445
chr1	139227208	139227529
chr1	139843270	139843640
chr1	139941160	139941507
chr1	139982357	139982752
chr1	140454931	140455250
chr1	140516592	140516963
chr1	140534523	140534778
chr1	140648952	140649304
chr1	140731914	140732312
chr1	140752786	140753022
chr1	141052912	141053353
chr1	141058255	141058550
chr1	141059324	141059780
chr1	141164432	141164831
chr1	141210923	141211155
chr1	141237026	141237308
chr1	141318417	141318740
chr1	141334917	141335377
chr1	142068176	142068450
chr1	142428122	142428505
chr1	142557992	142558342
chr1	143858226	143858768
chr1	144638895	144639327
chr1	145491436	145491717
chr1	145549787	145550367
chr1	145624172	145624489
chr1	145635822	145636367
chr1	145650715	145650985
chr1	145660992	145661418
chr1	145853805	145854065
chr1	146044763	146045184
chr1	146227187	146227515
chr1	146253761	146254118
chr1	149070314	149070734
chr1	150840743	150841032
chr1	151101147	151101650
chr1	151605618	151605976
chr1	151656529	151657095
chr1	151680110	151680399
chr1	151703797	151704258
chr1	152113690	152114353
chr1	152154680	152155131
chr1	152220000	152220411
chr1	152239927	152240456
chr1	152317861	152318136
chr1	152344867	152345120
chr1	152387369	152387722
chr1	152438256	152438820
chr1	152479658	152479973
chr1	152627008	152627607
chr1	152767386	152767830
chr1	152840829	152841202
chr1	152856589	152856920
chr1	152858115	152858530
chr1	152882047	152882501
chr1	152926021	152926418
chr1	153237137	153237545
chr1	153308288	153308763
chr1	153411511	153411931
chr1	153553211	153553668
chr1	153563577	153563838
chr1	153667570	153667999
chr1	154127168	154127554
chr1	154137881	154138354
chr1	154216326	154216672
chr1	154358108	154358756
chr1	154367907	154368345
chr1	154372121	154372471
chr1	154593597	154593927
chr1	154615262	154615702
chr1	154626163	154626633
chr1	154637249	154637755
chr1	154662309	154662657
chr1	154751726	154752077
chr1	154882494	154882960
chr1	154887354	154887629
chr1	154913390	154913909
chr1	154939310	154939695
chr1	154948569	154949143
chr1	155233807	155234275
chr1	155248856	155249340
chr1	155298433	155298716
chr1	155327541	155328037
chr1	155397932	155398331
chr1	155404005	155404456
chr1	155406382	155406783
chr1	155589527	155590063
chr1	155593838	155594225
chr1	155596341	155596879
chr1	155654521	155654928
chr1	155694048	155694439
chr1	155741879	155742422
chr1	155879578	155880066
chr1	155923815	155924281
chr1	155965345	155966143
chr1	155999751	156000032
chr1	156028058	156028503
chr1	156029896	156030186
chr1	156037416	156037741
chr1	156086046	156086296
chr1	156128541	156128966
chr1	156576698	156577050
chr1	156633272	156633760
chr1	156635203	156635563
chr1	156643856	156644221
chr1	156853645	156854128
chr1	156872911	156873349
chr1	156896072	156896441
chr1	156987266	156987594
chr1	157065314	157065660
chr1	157071269	157071732
chr1	157128523	157128982
chr1	157140475	157140894
chr1	157363713	157364054
chr1	157384357	157384823
chr1	157411879	157412334
chr1	157422361	157422916
chr1	157423517	157424116
chr1	157568558	157569047
chr1	157631908	157632305
chr1	157883523	157883926
chr1	157890194	157890494
chr1	157932932	157933321
chr1	158159599	158160000
chr1	158171064	158171633
chr1	158171841	158172293
chr1	158193359	158193973
chr1	158348355	158348695
chr1	158468490	158468846
chr1	158470221	158470643
chr1	158544725	158545128
chr1	158561112	158561474
chr1	158563356	158563747
chr1	158606307	158606681
chr1	158671885	158672478
chr1	158682436	158682890
chr1	158840075	158840411
chr1	158847582	158847983
chr1	159006386	159006839
chr1	159007097	159007619
chr1	159009439	159009843
chr1	159012083	159012485
chr1	159016254	159016613
chr1	159216742	159217038
chr1	159376543	159376832
chr1	159395359	159395768
chr1	159466585	159466997
chr1	159467705	159468107
chr1	159483131	159483553
chr1	159490668	159491264
chr1	159675770	159676122
chr1	159688501	159688846
chr1	159987102	159987392
chr1	160144929	160145234
chr1	160273566	160273834
chr1	160527111	160527638
chr1	160584300	160585117
chr1	160600338	160600702
chr1	160643469	160643723
chr1	160883671	160884045
chr1	161065455	161065878
chr1	161216973	161217295
chr1	161220282	161220798
chr1	161320164	161320570
chr1	161326578	161327006
chr1	161453611	161454041
chr1	161496121	161496563
chr1	161713988	161714392
chr1	161974565	161974867
chr1	161992134	161992491
chr1	162011124	162011555
chr1	162124853	162125279
chr1	162143173	162143622
chr1	162161167	162161486
chr1	162307808	162308092
chr1	162329416	162329950
chr1	162341052	162341300
chr1	162491528	162491913
chr1	162644920	162645185
chr1	162673450	162673887
chr1	162688307	162688781
chr1	162864061	162864715
chr1	163100781	163101229
chr1	163110759	163111305
chr1	163125580	163126045
chr1	163144415	163144960
chr1	163216819	163217252
chr1	163330272	163330612
chr1	163617688	163618110
chr1	163665669	163665941
chr1	163666938	163667360
chr1	163678259	163678619
chr1	163893176	163893601
chr1	163899050	163899415
chr1	163906452	163907058
chr1	163929873	163930336
chr1	164217054	164217567
chr1	164243799	164244139
chr1	164266755	164267122
chr1	164288100	164288573
chr1	164289397	164289726
chr1	164461774	164462085
chr1	164479914	164480590
chr1	164550624	164551256
chr1	164595249	164595570
chr1	164670677	164670934
chr1	164711258	164711529
chr1	164744007	164744365
chr1	164825934	164826399
chr1	164987552	164987884
chr1	165000681	165001141
chr1	165021638	165021903
chr1	165080508	165080989
chr1	165709398	165709782
chr1	165764224	165764517
chr1	165840516	165841025
chr1	165939304	165939768
chr1	165991415	165991724
chr1	166068733	166069358
chr1	166078080	166078403
chr1	166114668	166115148
chr1	166245410	166245804
chr1	166246711	166247336
chr1	166272226	166272673
chr1	166296854	166297223
chr1	166385719	166385980
chr1	166675128	166675414
chr1	166692496	166692711
chr1	166800788	166801223
chr1	166828899	166829246
chr1	166835199	166835538
chr1	167050530	167050956
chr1	167062548	167063108
chr1	167182177	167182587
chr1	167250634	167251160
chr1	167319009	167319337
chr1	167509541	167509904
chr1	167512333	167512598
chr1	167513651	167514045
chr1	167571503	167571900
chr1	167588716	167589151
chr1	167590906	167591341
chr1	167666289	167666822
chr1	167701541	167702134
chr1	167705647	167706048
chr1	167709978	167710266
chr1	167710543	167711043
chr1	167783809	167784229
chr1	167897197	167897657
chr1	167932729	167933074
chr1	168033225	168033753
chr1	168083535	168083898
chr1	168084282	168084742
chr1	168090652	168091131
chr1	168184104	168184423
chr1	168249323	168249683
chr1	168290285	168290665
chr1	168668149	168668534
chr1	168712286	168712570
chr1	168932641	168933033
chr1	168964598	168964995
chr1	169142413	169142800
chr1	169150678	169151227
chr1	169267555	169267961
chr1	169300016	169300523
chr1	169344291	169345359
chr1	169567069	169567606
chr1	169568170	169568610
chr1	169574945	169575507
chr1	169599817	169600333
chr1	169712303	169712633
chr1	169826339	169826846
chr1	169845350	169845784
chr1	169859971	169860462
chr1	169862195	169862707
chr1	169872067	169872463
chr1	170144253	170144639
chr1	170252989	170253466
chr1	170306518	170306855
chr1	171277951	171278198
chr1	171284201	171284411
chr1	171389507	171389878
chr1	171425809	171426144
chr1	171447561	171448525
chr1	171462313	171462617
chr1	171600834	171601090
chr1	171604268	171604623
chr1	171848098	171848540
chr1	171849329	171849723
chr1	171851684	171852092
chr1	171864261	171864744
chr1	171869432	171869893
chr1	171880765	171881140
chr1	172066506	172066861
chr1	172130534	172130826
chr1	172148674	172148981
chr1	172222638	172222998
chr1	172542831	172543110
chr1	172543359	172543861
chr1	172562497	172562980
chr1	172802094	172802452
chr1	172815465	172815777
chr1	172825398	172825751
chr1	172830978	172831567
chr1	172831725	172832163
chr1	172922748	172923075
chr1	172926887	172927259
chr1	173000523	173000783
chr1	173008144	173008438
chr1	173041003	173041519
chr1	173150832	173151422
chr1	173152668	173153048
chr1	173168576	173168996
chr1	173177055	173177535
chr1	173187300	173187720
chr1	173211736	173212187
chr1	173251545	173251933
chr1	173286107	173286460
chr1	173288514	173289053
chr1	173291123	173291704
chr1	173310037	173310536
chr1	173317311	173317812
chr1	173400307	173400794
chr1	173409139	173409512
chr1	173431608	173432432
chr1	173432553	173432909
chr1	173433400	173433849
chr1	173494282	173494816
chr1	173496977	173497342
chr1	173544078	173544469
chr1	173602679	173602865
chr1	173629174	173629509
chr1	173745938	173746273
chr1	173930741	173931279
chr1	173942110	173942544
chr1	173977001	173977373
chr1	174049717	174050239
chr1	174059282	174059550
chr1	174073734	174074021
chr1	174092149	174092469
chr1	174119112	174119353
chr1	174147247	174147617
chr1	174177887	174178221
chr1	174239720	174240717
chr1	174254814	174255522
chr1	174256242	174257117
chr1	174263695	174263971
chr1	174287638	174288140
chr1	174294737	174295225
chr1	174298889	174299350
chr1	174339132	174339577
chr1	174340927	174341319
chr1	174342366	174342835
chr1	174411951	174412362
chr1	174420217	174420964
chr1	174448168	174448586
chr1	174458732	174459275
chr1	174492831	174493719
chr1	174524661	174525054
chr1	174549407	174549882
chr1	174563141	174563656
chr1	174580663	174580987
chr1	175253794	175254295
chr1	175269649	175270007
chr1	175307578	175308027
chr1	175328815	175329104
chr1	175386540	175386848
chr1	175783924	175784152
chr1	176033928	176034216
chr1	176396476	176396844
chr1	176399914	176400310
chr1	176432689	176432990
chr1	176483813	176484089
chr1	176522576	176522944
chr1	176525103	176525448
chr1	176971524	176971923
chr1	177049087	177049624
chr1	177556090	177556437
chr1	177598998	177599503
chr1	177797739	177798026
chr1	177854022	177854339
chr1	177866518	177866930
chr1	178153272	178153719
chr1	178588827	178589190
chr1	178630003	178630261
chr1	178642544	178642903
chr1	178792232	178792641
chr1	178807803	178808281
chr1	179118864	179119307
chr1	179615091	179615401
chr1	179632609	179633375
chr1	179635372	179635650
chr1	179737003	179737230
chr1	179775982	179776331
chr1	179870542	179870952
chr1	180002943	180003276
chr1	180076556	180076974
chr1	180117888	180118528
chr1	180172217	180172704
chr1	180233563	180233926
chr1	180379417	180379720
chr1	180393869	180394216
chr1	180398342	180398840
chr1	180427015	180427349
chr1	180457281	180457575
chr1	180460626	180461181
chr1	180890375	180890788
chr1	181017169	181017479
chr1	181067233	181067607
chr1	181072333	181072686
chr1	181162197	181162567
chr1	181381347	181381760
chr1	181406644	181407579
chr1	181432685	181433238
chr1	181436967	181437470
chr1	181553794	181554166
chr1	181554525	181554848
chr1	181563474	181563792
chr1	181575745	181576268
chr1	181664494	181665031
chr1	181665175	181665956
chr1	181775022	181775436
chr1	181777793	181778241
chr1	181783542	181783965
chr1	181789291	181789712
chr1	181858962	181859328
chr1	182046739	182047082
chr1	182105101	182105625
chr1	182145173	182145572
chr1	182160667	182161181
chr1	182193687	182194096
chr1	182198636	182199158
chr1	182317683	182318034
chr1	182337165	182337845
chr1	182352210	182352653
chr1	182358503	182359040
chr1	182364273	182364674
chr1	182414177	182414677
chr1	182481012	182481294
chr1	182650488	182650839
chr1	182694057	182694459
chr1	182698564	182699200
chr1	182704593	182705266
chr1	182707717	182708069
chr1	182741625	182742263
chr1	182793698	182794145
chr1	182804104	182804770
chr1	182819478	182820335
chr1	182831134	182831704
chr1	182841302	182841555
chr1	182849834	182850217
chr1	182904459	182905061
chr1	182906429	182906835
chr1	182910586	182910961
chr1	182917868	182918345
chr1	182922224	182922696
chr1	182952284	182952885
chr1	182969686	182970128
chr1	182979609	182979985
chr1	183003266	183003571
chr1	183162767	183163299
chr1	183203021	183203310
chr1	183309722	183310127
chr1	183375764	183376118
chr1	183395202	183395502
chr1	183449246	183449638
chr1	183474113	183474490
chr1	183475471	183476029
chr1	183546281	183546675
chr1	183547468	183547893
chr1	183658865	183659186
chr1	183757770	183758110
chr1	183811658	183812180
chr1	183818746	183819515
chr1	184045321	184046186
chr1	184054488	184055047
chr1	184060977	184061348
chr1	184070425	184070915
chr1	184080120	184080492
chr1	184241548	184241934
chr1	184306280	184306803
chr1	184419697	184420380
chr1	184447597	184447875
chr1	184469562	184469867
chr1	184483804	184484472
chr1	184490442	184490800
chr1	184494540	184494857
chr1	184587914	184588397
chr1	184722661	184723024
chr1	184798562	184798851
chr1	184825846	184826247
chr1	184890141	184890649
chr1	184913150	184913473
chr1	184920882	184921480
chr1	185480910	185481333
chr1	186059494	186059851
chr1	186089909	186090371
chr1	186219110	186219493
chr1	186271753	186272320
chr1	186561847	186562227
chr1	186595467	186595905
chr1	186614926	186615338
chr1	186648383	186649482
chr1	186676226	186676536
chr1	186677133	186677523
chr1	186706829	186707261
chr1	186742421	186742776
chr1	186789551	186790182
chr1	187011306	187011584
chr1	187017449	187017930
chr1	187227880	187228265
chr1	187233781	187234049
chr1	187325803	187326145
chr1	187341442	187341792
chr1	187370073	187370509
chr1	187505776	187506244
chr1	188006508	188006794
chr1	188216895	188217179
chr1	188279945	188280376
chr1	188374159	188374513
chr1	188536631	188537110
chr1	188545787	188546233
chr1	188651622	188652003
chr1	188783306	188783660
chr1	188855642	188856032
chr1	188961348	188961701
chr1	189272063	189272391
chr1	189276047	189276504
chr1	189278343	189278662
chr1	189798379	189798665
chr1	190457714	190457931
chr1	190628817	190629377
chr1	190771614	190772054
chr1	190803933	190804334
chr1	190816994	190817428
chr1	190847072	190847518
chr1	190852158	190852472
chr1	190904604	190905041
chr1	191051424	191051736
chr1	191139812	191140143
chr1	191403274	191403614
chr1	191452330	191452670
chr1	191485778	191486105
chr1	191499234	191499672
chr1	191524903	191525178
chr1	191706671	191707952
chr1	191711343	191711744
chr1	191751581	191752013
chr1	191796920	191797318
chr1	191869740	191870084
chr1	192365931	192366144
chr1	192519441	192519856
chr1	192621048	192621439
chr1	192655693	192656032
chr1	192705303	192705878
chr1	192768199	192768585
chr1	192813586	192813926
chr1	192826096	192826492
chr1	192892274	192892619
chr1	192899473	192899935
chr1	192908744	192909376
chr1	192949760	192950272
chr1	192976941	192977524
chr1	193006279	193006640
chr1	193025968	193026438
chr1	193099257	193099838
chr1	193112601	193113206
chr1	193123414	193123776
chr1	193131744	193132354
chr1	193136275	193136724
chr1	193176672	193177039
chr1	193215239	193215585
chr1	193386586	193387061
chr1	193399497	193400275
chr1	193641702	193642144
chr1	193653012	193653295
chr1	193658664	193659114
chr1	193731149	193731799
chr1	193788115	193788453
chr1	193788994	193789349
chr1	193819358	193819735
chr1	193916792	193917145
chr1	193918315	193918698
chr1	193931261	193931573
chr1	194012966	194013301
chr1	194014372	194014834
chr1	194267776	194268239
chr1	194422325	194422715
chr1	194538094	194538539
chr1	194548397	194548750
chr1	194553156	194553661
chr1	194571173	194571821
chr1	194610593	194610897
chr1	194738367	194738789
chr1	194956319	194956718
chr1	195034394	195034804
chr1	195081666	195082027
chr1	195150458	195150899
chr1	195156402	195156709
chr1	195190032	195190464
chr1	195202911	195203357
chr1	195208993	195209800
chr1	195212195	195212711
chr1	195275669	195276132
chr1	195330080	195330494
chr1	195402158	195402573
chr1	195415186	195415596
chr1	195425395	195425681
chr1	195499454	195499766
chr1	195525019	195525401
chr1	195529161	195529651
chr1	196049154	196049566
chr1	196434114	196434432
chr1	196444751	196445431
chr1	196450587	196450982
chr1	196587596	196587975
chr1	196643102	196643423
chr1	196665476	196665781
chr1	196705622	196706167
chr1	196779198	196779488
chr1	196788394	196788734
chr1	196802321	196802965
chr1	196866669	196866992
chr1	196957049	196957406
chr1	197058836	197059197
chr1	197067578	197067981
chr10	3012815	3013479
chr10	3270014	3270345
chr10	3460768	3461078
chr10	3651648	3652048
chr10	4310340	4310722
chr10	4486398	4486803
chr10	4499267	4499531
chr10	4504853	4505200
chr10	4521293	4521667
chr10	4545760	4545956
chr10	4555524	4555835
chr10	4559205	4559544
chr10	4711856	4712130
chr10	4746127	4746414
chr10	4791236	4791572
chr10	4833959	4834196
chr10	4856110	4856519
chr10	4865999	4866471
chr10	5009806	5010035
chr10	5028526	5028946
chr10	5118849	5119161
chr10	5175707	5176126
chr10	5184570	5184951
chr10	5621295	5621669
chr10	5671246	5671532
chr10	5747888	5748282
chr10	5941271	5941759
chr10	5954340	5954682
chr10	5974215	5974601
chr10	5999355	5999761
chr10	6012721	6013180
chr10	6257362	6257822
chr10	6304493	6304896
chr10	6349723	6350199
chr10	6350783	6351358
chr10	6373207	6373671
chr10	6402257	6402653
chr10	6605101	6605397
chr10	6773222	6773614
chr10	6811793	6812261
chr10	6814765	6815046
chr10	7013317	7013753
chr10	7238268	7238522
chr10	7297871	7298119
chr10	7320383	7320919
chr10	7393187	7393850
chr10	7529738	7530111
chr10	7590763	7591095
chr10	7603290	7603694
chr10	7897493	7897805
chr10	7916134	7916475
chr10	7960073	7960426
chr10	7962154	7962532
chr10	8043009	8043382
chr10	8402783	8403137
chr10	8435494	8435939
chr10	8462548	8463065
chr10	8486039	8486353
chr10	8512175	8512566
chr10	8515070	8515573
chr10	8732543	8733037
chr10	8773237	8773510
chr10	8791406	8791879
chr10	8894839	8895116
chr10	9295329	9295762
chr10	9396738	9397139
chr10	9474703	9474996
chr10	10040959	10041313
chr10	10075416	10075729
chr10	10128018	10128261
chr10	10277749	10278357
chr10	11000525	11000820
chr10	11046268	11046695
chr10	11081949	11082420
chr10	11169716	11170042
chr10	11236876	11237291
chr10	11725729	11726001
chr10	12332328	12332661
chr10	12335622	12335995
chr10	12410471	12410771
chr10	12639188	12639426
chr10	12642455	12643283
chr10	12716922	12717255
chr10	12736291	12736689
chr10	12738312	12738625
chr10	12807033	12807419
chr10	13149618	13149987
chr10	13284445	13284826
chr10	13402432	13402651
chr10	13688857	13689184
chr10	13766765	13767090
chr10	13809335	13809600
chr10	13917109	13917384
chr10	13920200	13920576
chr10	14041305	14041680
chr10	14110865	14111473
chr10	14123904	14124266
chr10	14169845	14170283
chr10	14171699	14172039
chr10	14425226	14425644
chr10	14454136	14454453
chr10	14892430	14892713
chr10	15019875	15020292
chr10	17447727	17448173
chr10	17452855	17453258
chr10	17480555	17480929
chr10	17589795	17590181
chr10	17774947	17775582
chr10	17827364	17827615
chr10	17917115	17917498
chr10	17930562	17930961
chr10	18038169	18038374
chr10	18039009	18039290
chr10	18108481	18108874
chr10	18111416	18111842
chr10	18113541	18113860
chr10	18149397	18149758
chr10	18173144	18173602
chr10	18248462	18248749
chr10	18265545	18265931
chr10	18282779	18283163
chr10	18292394	18292719
chr10	18321883	18322194
chr10	18480085	18480438
chr10	18555621	18556081
chr10	18623963	18624377
chr10	18630800	18631110
chr10	18636866	18637105
chr10	18673472	18673842
chr10	18734957	18735590
chr10	18889131	18889398
chr10	18905840	18906153
chr10	18959834	18960139
chr10	19017430	19017856
chr10	19211330	19211604
chr10	19238610	19238923
chr10	19412959	19413246
chr10	19427998	19428563
chr10	19431405	19431712
chr10	19432200	19432453
chr10	19501138	19501549
chr10	19531582	19531929
chr10	19613769	19614182
chr10	19626936	19627461
chr10	19635177	19635548
chr10	19653647	19654267
chr10	19654525	19654824
chr10	19793033	19793418
chr10	19845070	19845489
chr10	19868397	19868938
chr10	19890242	19890663
chr10	20009979	20010523
chr10	20015714	20016194
chr10	20034512	20035035
chr10	20081682	20081998
chr10	20125258	20125599
chr10	20635329	20635727
chr10	20647804	20648054
chr10	20668245	20668510
chr10	20685769	20686339
chr10	20695770	20696080
chr10	20702863	20703206
chr10	20712331	20712926
chr10	20753620	20753943
chr10	20877895	20878273
chr10	20908837	20909190
chr10	20977124	20977356
chr10	21057016	21057495
chr10	21098447	21098803
chr10	21102694	21103115
chr10	21185042	21185526
chr10	21320716	21321167
chr10	21712901	21713182
chr10	21715114	21715383
chr10	21715723	21716113
chr10	21727607	21727973
chr10	21730040	21730332
chr10	21738491	21738789
chr10	21754155	21754422
chr10	21756134	21756419
chr10	21860729	21861130
chr10	21931978	21932512
chr10	22122208	22122763
chr10	22191812	22192098
chr10	22299284	22299793
chr10	22308403	22308732
chr10	22338685	22338994
chr10	22434341	22434801
chr10	22495945	22496263
chr10	22497754	22498084
chr10	22801081	22801446
chr10	22806432	22807010
chr10	22836573	22836941
chr10	23331027	23331360
chr10	23391268	23391683
chr10	23497271	23497696
chr10	23531928	23532432
chr10	23534921	23535354
chr10	23662284	23662658
chr10	23699094	23699519
chr10	23800022	23800339
chr10	23830912	23831318
chr10	23851298	23851585
chr10	23893438	23893871
chr10	23910145	23910529
chr10	23911899	23912147
chr10	24017617	24018034
chr10	24018318	24018728
chr10	24031923	24032521
chr10	24101682	24102084
chr10	24129804	24130093
chr10	24310959	24311348
chr10	24341387	24341804
chr10	24342282	24342836
chr10	24344845	24345318
chr10	24350356	24350883
chr10	24509487	24509974
chr10	24517020	24517420
chr10	24589444	24589819
chr10	24605822	24606250
chr10	24680947	24681164
[truncated: 24,438 more rows]
