# Supplementary material for: YY1 and CTCF orchestrate a 3D chromatin looping switch during early neural lineage commitment
Source: HighWire-hosted journal article supplement (doi:10.1101/gr.215160.116), 2017-05-23
Supplement: Supplemental_Table_S12.xlsx [file Supplemental_Table_S12.xlsx]

## Sheet: YY1_NPC_onlymapped_sorted_nodup
Beagan et al. 2017
Table S12, Significant YY1 Peaks in NPCs
#chr	start	end	score	signalValue	-LOG10(p-value)	-LOG10(q-value)
chr1	3754882	3755060	10	1.99186	2.32124	1.07773
chr1	4313197	4313366	19	3.48382	4.36066	1.9029
chr1	4679448	4679616	5	1.46384	1.5061	0.56545
chr1	4760771	4761231	15	2.11739	2.64879	1.51921
chr1	4775733	4775901	8	2.03135	2.2428	0.82758
chr1	4797899	4798091	6	1.50548	1.57513	0.61947
chr1	4847536	4847704	6	2.05467	2.18607	0.63359
chr1	5013146	5014428	12	2.1553	2.83502	1.25597
chr1	9538150	9538344	7	2.07122	2.29397	0.75239
chr1	9554665	9554950	6	2.13148	2.31493	0.67837
chr1	9556494	9556776	13	2.43916	3.01457	1.33879
chr1	9738597	9738832	6	2.07972	2.31469	0.68566
chr1	9934078	9934312	20	2.78043	3.74988	2.06733
chr1	10027629	10028421	14	2.38741	3.04007	1.43431
chr1	10222899	10223211	31	3.25787	4.86292	3.1752
chr1	12634713	12635064	300	10.9241	31.9794	30.0781
chr1	12949790	12950096	865	24.3011	89.8094	86.5171
chr1	13363991	13364183	857	23.0267	88.5628	85.7319
chr1	13604749	13604975	834	21.4154	86.372	83.4521
chr1	13926230	13926440	380	9.02642	39.8267	38.0731
chr1	14171361	14171569	301	7.91655	31.7066	30.1392
chr1	15795562	15796112	96	3.74585	11.2946	9.65934
chr1	16094341	16094537	13	2.27046	3.22656	1.32038
chr1	16101894	16102087	44	4.43395	6.91407	4.40246
chr1	16145000	16145303	16	2.21203	2.83936	1.66886
chr1	16609086	16609440	194	9.40967	21.4693	19.4632
chr1	16747665	16747837	162	7.00958	18.2304	16.2004
chr1	17004170	17004343	161	7.46226	18.5352	16.1536
chr1	18766450	18766747	76	4.77013	9.22561	7.64605
chr1	20857783	20858157	9	2.6814	2.99314	0.90793
chr1	20895484	20896013	22	3.5821	4.54366	2.23181
chr1	23328140	23328477	113	6.92038	13.4882	11.3715
chr1	24107513	24107725	41	3.61745	5.76714	4.19349
chr1	24232647	24233116	38	3.89945	5.72921	3.84264
chr1	24685445	24685714	15	2.65252	3.35509	1.55646
chr1	25881462	25881658	8	2.00486	2.4118	0.89461
chr1	25949795	25950107	12	2.654	3.23058	1.21229
chr1	26053658	26054119	21	2.82672	3.71045	2.16319
chr1	30930377	30930592	8	2.14838	2.40093	0.87262
chr1	31005797	31007243	43	3.82587	6.10888	4.32117
chr1	31159783	31159980	43	2.86256	5.23	4.33612
chr1	33870838	33871727	31	3.17979	5.05715	3.14897
chr1	34178272	34178841	81	6.18607	10.4428	8.11423
chr1	34207135	34207907	16	2.45947	3.13533	1.60083
chr1	34495997	34496908	21	2.65268	3.81085	2.128
chr1	34720611	34721084	7	2.2418	2.43303	0.71662
chr1	34721895	34723415	31	3.42767	4.90364	3.142
chr1	36301061	36301329	17	2.40529	3.25881	1.75536
chr1	36501959	36502286	76	5.50771	9.54063	7.64799
chr1	36568642	36568894	10	2.08816	2.55982	1.04767
chr1	36603839	36604174	44	3.55242	6.55814	4.43001
chr1	36653016	36653372	22	2.89591	3.90701	2.23766
chr1	36660399	36660606	117	7.3776	13.7886	11.7243
chr1	36663791	36664059	88	6.48426	11.1227	8.8866
chr1	36748462	36748785	24	3.10028	4.1771	2.49586
chr1	36996188	36997054	18	2.68271	3.59907	1.89671
chr1	37006442	37006688	8	2.3182	2.56668	0.84191
chr1	37119946	37120253	38	3.55314	5.48614	3.82721
chr1	37486823	37487098	20	2.92858	3.86333	2.05324
chr1	37922018	37922238	47	3.92192	6.53903	4.76594
chr1	38054052	38054751	22	2.57597	3.77782	2.27786
chr1	38403216	38403384	16	2.54089	3.24693	1.64383
chr1	39067471	39067771	12	2.62376	3.27038	1.26877
chr1	39424670	39424838	49	4.91922	7.33533	4.95664
chr1	39500572	39501020	39	3.59594	5.48011	3.94941
chr1	39634004	39634278	20	2.62912	3.70518	2.06736
chr1	39831025	39831246	47	3.0813	6.80207	4.71475
chr1	39895637	39895893	92	4.86298	12.115	9.25324
chr1	41007014	41007204	73	4.26571	8.79708	7.31245
chr1	41446295	41447498	50	3.76652	6.77147	5.07316
chr1	41709449	41709815	217	8.57327	23.7982	21.7855
chr1	42408788	42409070	546	15.841	56.7869	54.6752
chr1	42530070	42530326	1153	30.5114	118.16	115.304
chr1	42596638	42596934	807	20.5853	82.6612	80.7445
chr1	42907852	42908363	1360	32.3063	138.654	136.037
chr1	42977802	42977984	1041	32.7535	107.267	104.199
chr1	43149538	43149883	473	17.0595	49.6147	47.3554
chr1	43155159	43155952	77	4.07144	9.45842	7.75416
chr1	43321405	43321587	13	2.35485	2.83764	1.33131
chr1	43374127	43374592	15	3.08166	3.71298	1.50385
chr1	43833056	43833244	23	2.86775	4.25838	2.3454
chr1	43990766	43991004	109	6.63267	12.7116	10.9024
chr1	44175293	44175488	211	10.7337	23.2937	21.137
chr1	45007932	45008100	25	1.85472	3.12182	2.51097
chr1	45851698	45852526	64	4.212	8.37019	6.48864
chr1	46475844	46476176	184	6.10961	21.2825	18.457
chr1	51273749	51273970	99	4.40006	12.1096	9.98091
chr1	51972049	51972217	28	2.88897	4.74814	2.87937
chr1	52053691	52053951	19	3.06281	4.07147	1.93844
chr1	52901911	52902152	40	3.30936	5.37007	4.06683
chr1	53370467	53370635	105	6.339	12.4368	10.5486
chr1	53841437	53841879	30	3.09561	4.69011	3.07405
chr1	54541696	54541906	27	3.01939	4.43981	2.75931
chr1	54555504	54555750	53	3.99913	7.39854	5.37718
chr1	54722777	54723056	30	2.90719	4.95895	3.02591
chr1	55083690	55084463	120	6.34105	14.0503	12.097
chr1	55109610	55109778	12	2.50793	3.04757	1.2101
chr1	55145310	55145525	42	3.84364	6.107	4.25399
chr1	55187902	55188296	18	2.77984	3.58682	1.83852
chr1	55258712	55259117	37	3.36006	5.35059	3.79264
chr1	55511079	55511319	99	5.89032	11.9684	9.97383
chr1	56838788	56839121	482	16.3693	50.7023	48.2656
chr1	57291062	57291367	584	16.4328	60.2756	58.4854
chr1	57462949	57463830	817	22.4927	84.1955	81.7
chr1	57638871	57639393	391	9.61292	40.232	39.1911
chr1	57830863	57831517	648	15.3112	66.3473	64.8949
chr1	58020581	58020754	1660	37.2301	169	166.056
chr1	58026302	58026983	1445	32.1807	147.069	144.541
chr1	58052441	58052834	1138	21.0411	115.914	113.861
chr1	58086735	58088020	1458	27.2519	148.275	145.812
chr1	58480193	58481065	579	13.5088	60.0137	57.9009
chr1	58501972	58502480	136	9.55651	16.8766	13.6888
chr1	58561151	58562263	99	6.83895	12.1892	9.90104
chr1	58670694	58670970	18	2.35645	3.124	1.83728
chr1	58709321	58709522	12	2.52386	3.00886	1.27456
chr1	58768198	58768672	77	5.24408	9.6186	7.7931
chr1	58770047	58770368	12	2.11391	2.65844	1.20687
chr1	58773040	58773275	22	2.5389	3.7346	2.26714
chr1	58776065	58776235	9	2.83273	3.20444	0.97801
chr1	59030000	59030434	28	2.8872	4.69305	2.80229
chr1	59176661	59176919	6	1.86977	2.05094	0.67347
chr1	59471471	59472041	96	6.64929	13.0224	9.69035
chr1	59540621	59542022	109	6.06183	13.36	10.9344
chr1	59572824	59573364	189	7.86757	21.0009	18.9062
chr1	59680405	59680590	299	11.1761	32.3661	29.9061
chr1	59741792	59742234	129	5.46358	14.9382	12.9332
chr1	59969359	59970168	4	1.44156	1.46563	0.41079
chr1	60882682	60882990	14	2.53709	3.14678	1.42666
chr1	61196168	61196470	9	2.39411	2.71282	0.95465
chr1	62089249	62089920	10	2.85861	3.24514	1.04285
chr1	62749467	62750246	31	3.58607	5.52969	3.12829
chr1	62998116	62998290	21	2.30571	3.42536	2.1661
chr1	63161160	63161537	21	2.72012	3.82755	2.18482
chr1	63169288	63169579	18	3.36327	4.20188	1.83665
chr1	63223085	63223441	11	2.3728	2.78075	1.14146
chr1	63564307	63564564	15	2.62224	3.2689	1.58812
chr1	63777031	63777453	51	3.90117	6.98452	5.12026
chr1	63810174	63811204	265	10.0929	29.0212	26.5892
chr1	64067137	64067561	151	6.7034	17.0723	15.104
chr1	64166114	64167094	58	3.93891	7.68043	5.8561
chr1	64167879	64168314	10	2.00444	2.43124	1.0212
chr1	64189818	64190024	60	5.21739	8.21895	6.02656
chr1	64234359	64234722	42	3.54296	5.62336	4.27953
chr1	64236276	64237230	7	2.40374	2.63942	0.78756
chr1	64242494	64242970	13	2.55631	3.04	1.34342
chr1	64352112	64352377	25	3.02236	4.15506	2.57911
chr1	64578791	64579839	11	2.41169	2.79397	1.12608
chr1	64697790	64697958	29	2.91557	5.06395	2.98995
chr1	64737140	64737782	47	3.74546	7.18162	4.77973
chr1	64841843	64842428	81	4.49347	10.3926	8.14546
chr1	65224915	65225821	123	4.73433	14.4002	12.3449
chr1	66224255	66224618	141	4.36011	15.5597	14.1166
chr1	66241936	66242126	413	10.5388	44.0827	41.3326
chr1	66272906	66273667	693	17.4787	72.0231	69.3416
chr1	66368200	66368784	904	21.5572	93.1052	90.4082
chr1	66369921	66370220	735	16.2901	76.1227	73.538
chr1	66371015	66371247	522	11.2212	54.517	52.2543
chr1	66433283	66433612	312	7.78921	33.2431	31.2475
chr1	66739341	66739544	300	8.76981	32.8817	30.0322
chr1	66747324	66747615	101	4.4877	12.0771	10.1265
chr1	67057807	67057975	20	2.8666	4.17396	2.00988
chr1	67444535	67444932	8	2.63301	2.97461	0.89551
chr1	69002156	69002418	19	2.28234	3.28561	1.98499
chr1	69152658	69152869	33	3.6056	5.37929	3.3243
chr1	69733674	69733883	18	2.55537	3.61132	1.82999
chr1	71149097	71149612	7	2.16812	2.34697	0.72506
chr1	71349442	71349616	23	3.15708	4.38484	2.37063
chr1	72078302	72078603	74	4.6551	9.43646	7.41178
chr1	72353841	72354184	137	6.5118	16.0264	13.7778
chr1	72629697	72630083	77	4.5963	9.77583	7.76218
chr1	72785740	72786528	119	6.34887	13.8744	11.9338
chr1	73163291	73163459	43	3.80518	6.06136	4.3184
chr1	73317509	73317911	8	2.24894	2.58086	0.88119
chr1	73875741	73875993	62	5.04108	8.27824	6.20573
chr1	73911137	73911355	49	4.06973	6.78119	4.97902
chr1	73949264	73949515	8	2.05669	2.39846	0.88615
chr1	73988946	73989114	6	1.85292	1.98121	0.67776
chr1	74157926	74158198	24	3.60511	4.65382	2.41909
chr1	74168450	74168707	16	2.50967	3.43196	1.60117
chr1	74282991	74283495	36	3.10727	5.41059	3.63677
chr1	74331438	74332005	14	2.58853	3.1834	1.40058
chr1	74438070	74438261	13	2.68189	3.20647	1.35315
chr1	74552657	74553389	14	2.59546	3.15933	1.41618
chr1	74585184	74585352	42	4.17103	6.16947	4.24246
chr1	74647759	74648073	252	12.0555	27.4138	25.2642
chr1	74707894	74708062	483	20.2871	50.8852	48.3189
chr1	74766402	74766702	541	21.4147	56.5222	54.1901
chr1	76028121	76028289	694	25.759	71.7841	69.4242
chr1	77493467	77493635	714	24.6214	73.3175	71.4637
chr1	78818484	78818747	1555	48.5578	158.7	155.59
chr1	78848894	78849134	1786	55.0468	181.997	178.619
chr1	79758124	79758475	1435	41.4214	146.069	143.59
chr1	79772516	79772872	1439	42.6733	146.784	143.942
chr1	79829366	79829602	798	24.5329	81.9818	79.8714
chr1	80634008	80634353	497	14.6212	51.9127	49.7065
chr1	81277260	81277904	421	13.4395	44.5366	42.1667
chr1	82279468	82279886	134	7.01231	15.4856	13.4763
chr1	82287283	82287558	5	1.66836	1.71366	0.50761
chr1	82721059	82721710	13	2.46722	3.00404	1.34837
chr1	82835791	82836325	14	2.76628	3.35084	1.42862
chr1	84152054	84152379	9	2.24379	2.62514	0.9128
chr1	84576010	84576261	8	2.41253	2.77932	0.87152
chr1	84617812	84618185	15	2.51226	3.28388	1.57799
chr1	84836110	84837004	12	2.40317	2.94411	1.28604
chr1	84930781	84931118	17	2.42423	3.36411	1.77443
chr1	84932365	84932568	10	1.87311	2.24917	1.04036
chr1	84989234	84989430	10	2.01314	2.35869	1.04476
chr1	85082935	85083441	73	6.33451	10.253	7.31779
chr1	85271996	85272258	235	11.2065	25.4235	23.5205
chr1	87485039	87485452	446	18.5496	46.9342	44.6397
chr1	87520915	87522348	492	20.1834	51.6933	49.2907
chr1	87818963	87819489	450	18.5161	47.2434	45.0083
chr1	87912463	87912726	281	11.8837	30.0766	28.1889
chr1	87928867	87929158	125	7.09541	14.5268	12.5947
chr1	87942499	87942913	48	3.80197	6.2246	4.8768
chr1	87950158	87950419	26	3.52871	4.72184	2.69329
chr1	87960800	87961112	24	3.03112	4.20719	2.46421
chr1	88245572	88245762	12	2.6054	3.06901	1.22267
chr1	88254676	88255870	16	2.49886	3.30864	1.63059
chr1	88338656	88339473	18	2.76502	3.55271	1.83927
chr1	88383697	88384739	30	3.09293	4.83803	3.02323
chr1	88421772	88422870	104	4.97202	12.3215	10.4674
chr1	88479295	88479610	91	5.97542	11.0834	9.16645
chr1	88483582	88483855	24	3.12042	4.33656	2.45691
chr1	89110317	89110599	16	2.69735	3.37314	1.66336
chr1	89170356	89170673	4	1.69155	1.71846	0.47464
chr1	89223441	89223797	159	8.37664	17.9725	15.9808
chr1	89471621	89471804	668	26.3959	69.6988	66.8569
chr1	89504623	89504845	285	11.4609	29.8814	28.5419
chr1	89618165	89618835	633	24.9796	66.059	63.3765
chr1	89652893	89653134	230	9.64248	24.3135	23.0687
chr1	89749877	89750056	334	14.8662	35.5813	33.4117
chr1	89904729	89905183	262	11.7539	28.395	26.2201
chr1	90174102	90174341	154	7.76156	17.2009	15.4412
chr1	90554934	90555154	189	8.90445	20.7384	18.9353
chr1	90595668	90596181	270	10.4111	29.5119	27.0795
chr1	90604812	90605443	217	8.86974	23.2478	21.7637
chr1	90733029	90733338	466	17.7621	48.9789	46.6607
chr1	90736546	90737063	672	23.7718	69.8478	67.2686
chr1	91125319	91125555	824	28.481	85.3286	82.4274
chr1	91198963	91199533	1126	40.3871	116.691	112.663
chr1	91297428	91297747	586	23.0242	61.1328	58.6777
chr1	91303138	91303306	470	19.5359	49.4272	47.013
chr1	91351316	91351793	165	8.68794	18.4087	16.5604
chr1	92371636	92372064	19	2.93708	3.7785	1.96146
chr1	92499988	92500288	11	2.65397	3.15752	1.19313
chr1	92578558	92578866	16	2.5582	3.25037	1.66631
chr1	92657778	92657952	15	2.73331	3.61356	1.5296
chr1	92822605	92823539	125	6.80143	14.8513	12.5563
chr1	92895193	92895366	83	4.67977	9.87404	8.3255
chr1	92935144	92936003	90	5.43985	11.0487	9.07604
chr1	92959009	92959250	56	4.07571	7.29868	5.61083
chr1	93105959	93107167	45	3.89288	6.69843	4.52386
chr1	93107869	93108468	46	4.06081	6.54877	4.66756
chr1	93146541	93146853	166	9.17195	19.0955	16.6533
chr1	93294652	93295490	84	5.65205	10.5084	8.48509
chr1	93497373	93497619	16	2.68897	3.3976	1.68988
chr1	93927276	93927444	13	2.44402	2.97988	1.37225
chr1	94077264	94077580	65	3.94233	8.50386	6.50032
chr1	94440386	94440595	116	4.65531	13.7284	11.6221
chr1	94641490	94641841	49	3.30617	6.69671	4.94309
chr1	94791753	94791936	11	2.26743	2.69857	1.18407
chr1	95202370	95202557	7	1.82739	2.16631	0.70808
chr1	95239951	95240642	31	3.50338	5.11355	3.14778
chr1	95374920	95376245	68	4.7322	8.78429	6.86969
chr1	95530552	95530898	67	5.31798	8.79048	6.79597
chr1	95650988	95651921	52	3.82467	7.07827	5.25899
chr1	95700240	95701298	245	7.51157	26.6846	24.5417
chr1	95948917	95949085	1026	28.7728	106.486	102.616
chr1	96400270	96400661	658	18.4501	68.2741	65.8614
chr1	99665726	99665894	444	14.3624	47.0996	44.4812
chr1	99667105	99667273	272	9.46835	29.2185	27.2511
chr1	104301333	104301627	261	9.98445	28.575	26.132
chr1	105036813	105037027	201	8.61527	22.6168	20.1133
chr1	105512465	105512639	47	2.99595	6.02715	4.78296
chr1	106665225	106667733	12	2.29363	2.9173	1.27167
chr1	106668609	106668915	8	2.0717	2.29894	0.86032
chr1	107352400	107352689	21	3.53197	4.43958	2.11614
chr1	107559760	107560890	181	8.99274	20.0073	18.1961
chr1	107890277	107890795	387	15.8148	40.9383	38.7273
chr1	108057396	108057684	9	1.81749	2.09964	0.99847
chr1	108067972	108068291	17	3.5072	4.33101	1.79427
chr1	108096159	108097104	24	3.00329	4.13088	2.44337
chr1	108516886	108517054	58	5.25897	8.14575	5.85414
chr1	108656475	108656716	55	4.5009	7.37602	5.52109
chr1	108693032	108693324	57	5.04827	8.06693	5.73638
chr1	108718942	108719242	12	2.28767	2.71394	1.20268
chr1	108766620	108766788	4	1.64526	1.69067	0.48998
chr1	114770744	114771213	8	2.00685	2.39701	0.84271
chr1	118145086	118145385	11	2.08304	2.49807	1.1422
chr1	120331557	120331799	37	4.17558	6.0504	3.7665
chr1	120930530	120930761	77	5.60431	9.61984	7.72745
chr1	121156056	121156239	7	1.9081	2.06466	0.71598
chr1	121430144	121430312	7	1.79705	1.95331	0.71329
chr1	121545354	121545559	42	3.74359	5.78871	4.21837
chr1	121733887	121734309	23	2.91021	4.14728	2.37756
chr1	121775511	121775981	13	2.56102	3.08969	1.30843
chr1	122012000	122012669	51	4.70027	7.3837	5.14259
chr1	122017386	122018291	38	3.60332	5.69836	3.87596
chr1	122983781	122984127	8	2.23161	2.48836	0.87167
chr1	123224227	123224403	10	2.26385	2.62917	1.07593
chr1	123464349	123464748	17	2.71256	3.39634	1.765
chr1	127331324	127332863	54	4.38308	7.32393	5.42464
chr1	127456791	127457006	75	5.26834	9.19387	7.50178
chr1	127921042	127921240	18	2.50374	3.2438	1.85581
chr1	128070010	128070201	25	3.44823	4.61863	2.50724
chr1	128581058	128581409	22	3.22974	4.18851	2.22548
chr1	128822191	128823214	28	3.7201	5.05135	2.84898
chr1	129004101	129004269	54	4.37078	7.17559	5.47337
chr1	129014996	129015171	35	3.03548	4.74726	3.53246
chr1	129670210	129671308	82	5.52068	10.166	8.2261
chr1	129765223	129765698	18	2.66568	3.5303	1.8258
chr1	129999265	129999973	24	3.27535	4.332	2.40885
chr1	130140902	130141228	6	1.86638	1.99696	0.66596
chr1	130696646	130696903	22	3.1402	4.09568	2.28306
chr1	132612548	132612759	10	2.14178	2.58928	1.06708
chr1	132613920	132614368	23	3.0841	4.15979	2.34436
chr1	132642859	132643033	10	1.85506	2.25557	1.02152
chr1	132834809	132835031	36	3.04239	5.04402	3.68368
chr1	132993633	132993827	19	2.36384	3.30726	1.91234
chr1	133035131	133035299	10	2.20507	2.70558	1.00017
chr1	133049736	133049982	17	2.37127	3.24611	1.71631
chr1	133370249	133370513	31	3.21341	5.05454	3.17175
chr1	133386061	133386229	32	3.27913	4.9273	3.21904
chr1	133470281	133470576	46	4.85205	7.30819	4.60743
chr1	133562432	133562600	24	3.03194	4.17503	2.43236
chr1	133605713	133605979	10	2.44022	2.80382	1.07584
chr1	133609119	133609382	7	2.14527	2.3327	0.7454
chr1	133662126	133662375	13	2.46653	2.99748	1.37082
chr1	133806701	133807828	14	2.51241	3.08271	1.48044
chr1	133937147	133937392	7	2.01983	2.225	0.78627
chr1	134118894	134119300	20	2.72406	3.55133	2.04402
chr1	134209353	134209535	12	2.33048	2.7873	1.22745
chr1	134264198	134264399	58	5.52827	8.51626	5.80859
chr1	134313953	134314269	12	2.13092	2.61789	1.29299
chr1	134778066	134778234	10	2.3633	2.8203	1.0973
chr1	134921489	134922007	58	4.41844	7.76891	5.81341
chr1	134976181	134976590	101	6.08505	12.401	10.1092
chr1	135027599	135028136	69	4.37736	8.91588	6.96654
chr1	135062325	135062611	131	7.20922	15.5681	13.1926
chr1	135074183	135074383	35	3.33875	5.33521	3.59244
chr1	135075284	135075608	19	2.86669	3.71038	1.90337
chr1	135084574	135084818	10	2.21245	2.62076	1.00535
chr1	135191351	135191519	11	2.2857	2.70858	1.14628
chr1	135320364	135320769	23	4.21773	5.27827	2.31646
chr1	135506369	135506837	5	1.68973	1.77965	0.56813
chr1	135557659	135558279	51	3.59011	6.88408	5.10523
chr1	135949877	135950129	7	1.87119	2.01544	0.70749
chr1	135959573	135960630	5	1.43724	1.48165	0.5791
chr1	135980701	135980869	7	2.41568	2.66148	0.79358
chr1	136032403	136032585	6	1.97081	2.11029	0.63036
chr1	136131324	136131599	25	3.10426	4.42573	2.58639
chr1	136258431	136258670	6	1.95236	2.10348	0.66019
chr1	136335343	136335511	8	2.57874	2.91021	0.89274
chr1	136351674	136352348	9	2.69226	3.04505	0.92042
chr1	136391256	136391742	5	1.78218	1.84871	0.51683
chr1	136457464	136457797	8	2.10103	2.37361	0.87722
chr1	136852088	136852746	46	3.58093	6.55044	4.65873
chr1	137042822	137043102	12	2.07573	2.51084	1.21482
chr1	137044158	137044629	19	2.77784	3.63407	1.93437
chr1	137055175	137055886	8	2.24718	2.50592	0.8791
chr1	137210111	137210495	15	2.6156	3.23671	1.52725
chr1	137326263	137327209	141	7.76878	16.4475	14.1978
chr1	137410247	137410415	57	4.07871	7.73873	5.74946
chr1	137454328	137454593	14	2.38032	3.14714	1.46706
chr1	137515777	137516134	12	2.4719	2.93979	1.25914
chr1	137914489	137915138	168	8.52562	18.5412	16.8967
chr1	137952399	137952734	343	14.3578	36.1923	34.3772
chr1	138026848	138027875	687	23.4529	70.6515	68.71
chr1	138124618	138124830	299	9.8192	30.76	29.9031
chr1	138241905	138242871	1377	41.7955	140.229	137.727
chr1	138359278	138359535	1808	53.0926	183.71	180.844
chr1	138603178	138603469	2431	73.0138	246.635	243.162
chr1	138678555	138679335	1113	34.0138	113.136	111.327
chr1	139275903	139276131	1883	58.0608	191.325	188.313
chr1	139794967	139795225	1441	43.8699	146.985	144.186
chr1	139796894	139797273	1275	38.9917	130.424	127.593
chr1	139824619	139825421	963	30.4004	98.7935	96.3522
chr1	140492897	140493073	639	21.9972	66.1881	63.9468
chr1	140753243	140753417	476	17.6371	49.8146	47.656
chr1	140860717	140860927	256	11.2804	27.668	25.6557
chr1	141319068	141319255	86	4.90911	10.0095	8.69899
chr1	141320067	141320427	140	8.51096	16.6459	14.0245
chr1	145549423	145549673	6	1.98029	2.14062	0.66872
chr1	145788732	145788992	15	2.16621	2.94032	1.52647
chr1	145853725	145854024	16	2.61472	3.67869	1.66473
chr1	148344612	148345290	9	2.30632	2.59771	0.92231
chr1	149190751	149191057	60	5.08218	8.22205	6.08738
chr1	149371391	149371559	26	2.65581	4.05367	2.6793
chr1	152240421	152240743	8	1.93414	2.16296	0.82783
chr1	153275620	153276029	95	6.74088	11.8353	9.57032
chr1	153347728	153347946	106	8.29439	13.8406	10.6803
chr1	153547122	153547463	42	4.39938	6.4105	4.27583
chr1	154247151	154247617	160	9.12839	18.4141	16.0447
chr1	154403745	154403974	294	12.9368	31.7746	29.4744
chr1	154471835	154472149	407	16.8248	43.4177	40.7814
chr1	154487642	154487942	537	20.4769	56.3991	53.7064
chr1	154665163	154665355	608	22.8599	63.7615	60.8754
chr1	154749394	154749831	409	16.26	43.3291	40.9601
chr1	154751742	154751910	327	13.5077	34.8918	32.7744
chr1	154884850	154885113	332	13.8361	35.4382	33.2233
chr1	154931254	154931526	170	7.59358	18.418	17.0273
chr1	155155369	155155892	130	6.8228	15.0471	13.0704
chr1	155334729	155334930	65	5.02879	8.61332	6.56961
chr1	155353647	155353822	10	2.39506	2.89522	1.02115
chr1	155386986	155387154	10	2.11472	2.44802	1.04964
chr1	155435010	155435478	20	2.8496	3.7006	2.02099
chr1	155482817	155483179	11	2.18446	2.95911	1.13033
chr1	155949933	155950270	19	2.22688	4.06919	1.99476
chr1	156003897	156004155	13	1.77522	2.96642	1.35741
chr1	156052356	156052553	6	1.44692	1.84026	0.62196
chr1	157005760	157006782	8	1.72056	2.53813	0.81776
chr1	157057306	157057490	6	1.6252	2.19406	0.68616
chr1	157081051	157081416	12	2.35392	3.33974	1.20966
chr1	157084332	157084993	17	1.92965	3.3729	1.76929
chr1	157264335	157264744	10	1.84054	2.77213	1.05046
chr1	157363757	157364016	10	1.60646	2.56796	1.06798
chr1	157820228	157820917	113	6.75276	13.3127	11.3028
chr1	157883071	157883456	23	3.11995	4.17733	2.39226
chr1	157887911	157888100	9	1.91883	2.26938	0.96797
chr1	158360148	158360441	67	4.47211	8.32272	6.72564
chr1	158454062	158454236	145	7.51355	16.6359	14.5872
chr1	158488705	158489121	94	5.13088	11.5955	9.48383
chr1	158604527	158604895	31	2.80599	4.92084	3.14539
chr1	158969186	158970159	43	3.41254	6.06819	4.36558
chr1	159342781	159343127	13	2.59303	3.20478	1.31417
chr1	159356117	159356381	13	2.27638	3.06017	1.35488
chr1	159370411	159370697	50	4.11182	7.10366	5.03313
chr1	159376488	159376791	63	4.52246	8.52804	6.39329
chr1	159436749	159437287	28	2.54028	4.19169	2.80902
chr1	160292759	160293183	41	3.58036	6.26398	4.18901
chr1	160316779	160317469	46	3.69095	6.56371	4.6885
chr1	160408117	160408285	27	3.52606	4.94106	2.73922
chr1	161162229	161162403	24	2.79395	3.91002	2.43859
chr1	161343350	161343725	149	8.15629	17.0743	14.9544
chr1	161591441	161591796	316	11.4898	34.2366	31.6745
chr1	161713103	161713271	203	6.59352	22.1966	20.3949
chr1	162125167	162125633	131	6.12328	15.0732	13.1173
chr1	162142503	162143562	776	22.2516	79.9636	77.6053
chr1	162836436	162836752	626	15.2425	64.987	62.6028
chr1	162837508	162837707	559	16.8284	58.5538	55.9051
chr1	162965182	162965454	373	12.5839	39.8489	37.3821
chr1	163000539	163001185	342	9.1785	36.3767	34.2885
chr1	163061375	163061836	1126	18.6228	115.257	112.676
chr1	163081253	163081528	1332	19.6294	135.972	133.253
chr1	163180253	163181286	1540	24.0249	156.879	154.07
chr1	163805861	163806692	1783	36.6595	181.261	178.327
chr1	164065987	164066165	2282	49.503	231.876	228.259
chr1	164139837	164140094	1358	29.7679	138.17	135.875
chr1	164224411	164224624	1670	35.7052	169.833	167.054
chr1	164500476	164500711	1385	29.6339	140.96	138.538
chr1	164545582	164546063	1321	28.1951	134.86	132.155
chr1	164670127	164670977	529	13.9915	55.2878	52.9456
chr1	164762074	164762798	14	1.80603	2.7696	1.4895
chr1	164990697	164990885	86	3.78195	10.4944	8.68763
chr1	165268944	165269536	102	5.64105	12.2582	10.242
chr1	165709545	165709713	19	2.26101	3.67181	1.93831
chr1	165859589	165860619	143	4.98471	16.3692	14.3747
chr1	166068867	166069035	375	10.0123	39.9347	37.5878
chr1	166178784	166179056	459	12.3638	48.1418	45.948
chr1	166194911	166195079	452	12.2592	47.3069	45.2279
chr1	166237128	166237739	463	12.8243	48.5984	46.3366
chr1	166325505	166325764	353	10.6059	37.6772	35.3597
chr1	167390598	167391398	50	3.5406	6.93872	5.07352
chr1	167428999	167429282	7	1.6622	2.28501	0.7467
chr1	167540397	167540738	6	1.60617	2.07494	0.65021
chr1	167565100	167565268	12	2.43779	2.90992	1.265
chr1	167693728	167694074	17	2.84552	3.60929	1.752
chr1	167896797	167896965	20	3.1187	4.03756	2.04646
chr1	167931174	167931499	9	2.55186	2.93306	0.98918
chr1	167932486	167932939	19	2.92403	3.8099	1.9668
chr1	168029878	168030498	8	2.60475	2.93273	0.886
chr1	168114230	168115015	11	3.16011	3.63317	1.12618
chr1	168213028	168213248	20	2.84778	3.74471	2.09009
chr1	168249313	168249558	34	3.85299	5.45781	3.40545
chr1	168271180	168271444	15	3.23773	3.923	1.54391
chr1	168309420	168310078	7	2.08718	2.28196	0.74601
chr1	168329145	168329499	13	2.73259	3.24639	1.36145
chr1	168339497	168339910	12	2.41049	2.87089	1.24431
chr1	168830714	168830908	15	2.87135	3.52786	1.52803
chr1	168961989	168962344	23	3.67936	4.84639	2.32858
chr1	169213691	169214173	14	2.49739	3.0897	1.48029
chr1	169238442	169239069	21	2.89715	3.88518	2.1041
chr1	169976406	169976752	10	2.07538	2.7378	1.07328
chr1	170175709	170175962	41	3.78097	5.75578	4.15707
chr1	170362234	170362729	22	3.59705	4.6633	2.27689
chr1	170605185	170605353	11	3.1454	3.60379	1.15027
chr1	170981719	170982030	15	2.6942	3.31942	1.57694
chr1	171864241	171864455	17	2.66017	3.50536	1.74317
chr1	172066648	172066838	29	3.70509	5.12399	2.96759
chr1	172145326	172145673	12	2.26528	2.91157	1.22175
chr1	172185718	172186035	9	2.08117	2.42848	0.95405
chr1	172815328	172815699	13	2.32674	2.98394	1.39446
chr1	172968170	172968706	9	1.97506	2.34366	0.95127
chr1	173041842	173042425	9	2.47631	2.80195	0.95929
chr1	173080334	173080869	12	2.19514	2.6858	1.23429
chr1	173151837	173152951	38	3.46864	5.71795	3.84892
chr1	173176881	173177714	208	8.96147	22.8293	20.8494
chr1	173200176	173201053	256	10.4528	27.6771	25.6377
chr1	173217725	173218300	980	26.4843	100.527	98.0128
chr1	173224486	173225221	1094	24.9184	112.028	109.475
chr1	173258634	173259741	230	9.33176	25.2167	23.0997
chr1	173275615	173276211	1456	39.0596	148.261	145.612
chr1	173340708	173341734	765	20.6864	78.7745	76.5104
chr1	173397025	173397193	23	2.59628	3.65692	2.34526
chr1	173432572	173432850	9	1.89506	2.18159	0.97154
chr1	173433645	173433938	13	2.13152	2.69658	1.35199
chr1	173752058	173752226	103	7.68223	13.3884	10.3011
chr1	174012547	174013004	75	5.03754	9.45258	7.5332
chr1	174056542	174057844	91	6.09177	11.1602	9.19129
chr1	174078018	174078618	11	2.43143	2.85179	1.1827
chr1	174133455	174133623	27	3.11998	4.43831	2.78669
chr1	174150598	174150914	34	3.59956	5.31884	3.48823
chr1	174433629	174433890	8	2.06024	2.2988	0.86683
chr1	176969877	176970046	6	2.17851	2.36825	0.69202
chr1	177670400	177670577	34	3.84917	5.43008	3.44673
chr1	177908883	177909169	13	1.9062	2.59377	1.30537
chr1	178944475	178944912	149	6.3442	16.9049	14.9241
chr1	179105597	179105768	53	3.93513	7.31805	5.32385
chr1	179238169	179238822	21	2.43558	3.67678	2.18284
chr1	179371875	179372332	25	3.00589	4.5609	2.59712
chr1	179377176	179377446	7	1.92079	2.22248	0.75855
chr1	179495904	179496285	87	5.22755	10.6921	8.70212
chr1	179726642	179727109	135	4.92998	15.3562	13.5986
chr1	179890591	179890892	340	9.05624	36.6048	34.0576
chr1	179912954	179913580	237	8.57687	25.7603	23.7276
chr1	180117299	180117834	42	3.89999	6.02977	4.24426
chr1	180248244	180249486	29	3.11825	4.67578	2.96778
chr1	180267904	180268208	24	3.06715	4.14067	2.43635
chr1	180288016	180288305	47	4.21605	6.51176	4.74966
chr1	180335658	180336787	11	2.42789	2.8492	1.14856
chr1	180984575	180984761	13	2.78231	3.33234	1.38389
chr1	181476236	181476819	36	3.17154	5.6095	3.67648
chr1	181598365	181598618	29	2.93275	4.78364	2.9477
chr1	181639516	181640082	6	1.71126	1.82193	0.67153
chr1	181732702	181732928	20	2.44276	3.5561	2.00655
chr1	181733771	181734564	60	4.17546	7.93758	6.01764
chr1	181889612	181890847	142	6.22689	16.5174	14.2948
chr1	182242603	182242771	83	4.38215	11.3209	8.36859
chr1	182295373	182295577	17	2.00871	3.47331	1.76328
chr1	182571345	182571713	81	5.63136	10.0189	8.11104
chr1	182656078	182656479	10	2.09526	2.48756	1.02309
chr1	182698381	182698917	65	4.89078	8.55454	6.5053
chr1	182742640	182743730	38	3.43828	5.42734	3.89629
chr1	182778312	182778876	196	10.5424	21.9963	19.6818
chr1	182780931	182781647	38	3.49185	5.61411	3.85871
chr1	182834650	182835024	7	2.38516	2.61515	0.77907
chr1	182945297	182945986	11	2.34063	2.85941	1.18161
chr1	182946915	182947083	30	2.83834	4.7127	3.07969
chr1	183074422	183074659	74	4.48732	9.33495	7.45788
chr1	183142029	183142255	236	11.3739	25.9474	23.69
chr1	183331422	183331590	134	6.01327	14.6031	13.4
chr1	183475667	183475976	376	13.8322	39.9461	37.6394
chr1	183567983	183568351	348	11.5684	36.6646	34.821
chr1	183771946	183772116	625	19.2289	65.1748	62.5956
chr1	183951068	183951339	698	20.6989	72.1902	69.8747
chr1	183963201	183963435	723	21.2278	74.6525	72.386
chr1	184035518	184035771	598	18.3573	62.0012	59.8131
chr1	184271230	184271978	216	8.43985	23.4775	21.6342
chr1	184338780	184339432	6	1.7622	1.92407	0.66232
chr1	184367220	184367389	11	3.00807	3.46397	1.17266
chr1	184392006	184392187	6	1.9225	2.05792	0.63861
chr1	184447381	184447684	5	1.87271	1.95649	0.55483
chr1	184469497	184469841	67	4.88778	8.5136	6.70601
chr1	184688776	184688978	15	2.6093	3.32802	1.51607
chr1	184852901	184853133	8	2.4967	2.78328	0.8522
chr1	184890236	184890471	13	2.48458	3.00891	1.32773
chr1	185770770	185771271	64	6.48968	9.63878	6.40001
chr1	185889869	185890191	8	2.00841	2.26918	0.88629
chr1	186272837	186273123	8	2.53289	2.82994	0.89843
chr1	186554610	186554870	27	3.03541	4.22312	2.71807
chr1	186823158	186823952	22	3.23968	4.30123	2.29589
chr1	187024620	187025083	88	5.2082	10.7758	8.84359
chr1	187940975	187941271	259	9.76604	28.3328	25.9919
chr1	188572826	188573405	159	6.8116	17.8794	15.9941
chr1	189074985	189075185	210	9.28671	23.1296	21.0797
chr1	189201613	189202431	81	5.30368	10.418	8.1648
chr1	189798366	189798626	13	2.73254	3.37137	1.34327
chr1	190831355	190831887	187	9.88189	20.9057	18.7484
chr1	191447682	191447985	54	4.6256	7.49248	5.42489
chr1	191555717	191555962	6	1.61969	1.74875	0.69017
chr1	191993743	191994594	20	2.70573	3.886	2.03605
chr1	192089373	192089596	34	2.89263	5.17307	3.49944
chr1	192306851	192307159	18	3.02536	3.8375	1.84202
chr1	192479929	192480448	8	2.29355	2.53194	0.80502
chr1	192506102	192506680	8	2.23213	2.47399	0.85228
chr1	192752178	192752602	157	7.02373	17.6044	15.7679
chr1	192802068	192803239	480	16.0829	50.0923	48.0291
chr1	192886727	192887232	373	12.9624	39.6558	37.3263
chr1	193398213	193398644	19	2.68543	3.46448	1.93166
chr1	193399505	193399956	35	3.61249	5.58428	3.5706
chr1	193632750	193633147	65	4.20659	8.25479	6.52885
chr1	193641668	193642172	17	2.59551	3.55191	1.77913
chr1	193658775	193658978	8	2.60227	2.90279	0.8797
chr1	193730758	193731161	11	2.37031	2.79897	1.13696
chr1	193916439	193916692	19	2.22878	3.78014	1.93601
chr1	193961760	193962308	12	2.29275	2.89836	1.25218
chr1	194999358	194999553	12	2.49939	2.96887	1.23387
chr1	195069471	195069712	14	2.68378	3.2527	1.40082
chr1	195098879	195099334	15	2.53099	3.209	1.57045
chr1	195163783	195164291	10	1.82347	2.16105	1.07268
chr1	195194180	195194622	48	4.45847	6.929	4.86358
chr1	195946394	195946562	10	2.28953	2.63823	1.0083
chr1	196439677	196440242	82	4.68438	10.148	8.24788
chr1	196573014	196573187	207	7.95781	22.648	20.7129
chr1	196804341	196805237	405	14.7215	43.087	40.5935
chr1	196846519	196846687	589	21.5347	61.8425	58.9139
chr1	196957319	196958171	195	8.24983	21.494	19.5378
chr1	197067711	197068061	77	4.94922	9.94936	7.72888
chr10	3234698	3234963	6	1.90909	2.05966	0.61446
chr10	4540357	4540966	8	2.34431	2.61566	0.82841
chr10	5729865	5730161	17	2.97258	3.86947	1.78024
chr10	5875658	5875826	17	2.48508	3.29027	1.73361
chr10	6178484	6178784	9	2.66032	3.00929	0.91805
chr10	6649136	6649576	9	2.29582	2.60767	0.96258
chr10	6788864	6789167	5	1.65746	1.72079	0.56008
chr10	6849407	6849853	35	3.56053	5.21406	3.59719
chr10	6952025	6952326	17	2.84227	3.55675	1.74416
chr10	7032465	7032633	10	1.70098	1.98009	1.04538
chr10	7400750	7401685	19	2.77561	3.60208	1.91258
chr10	7500124	7500556	6	1.97438	2.10737	0.65797
chr10	7512397	7512903	26	3.24845	4.45862	2.64014
chr10	7674418	7674831	54	4.77048	7.52791	5.47433
chr10	7675969	7676234	11	2.51024	2.94438	1.13437
chr10	8480522	8480805	99	6.3604	12.0657	9.9837
chr10	8521004	8521175	132	6.91444	14.881	13.209
chr10	8524053	8524327	268	12.2901	29.2538	26.8869
chr10	8679608	8679776	54	2.87538	6.10752	5.4391
chr10	9394516	9394735	327	14.977	35.1801	32.7382
chr10	10040912	10041173	101	5.9281	11.806	10.1187
chr10	10155021	10155305	17	2.53495	3.26826	1.73355
chr10	10192104	10192472	9	2.34821	2.64683	0.91359
chr10	11063009	11063851	38	3.56815	5.7747	3.86929
chr10	12057878	12058441	20	1.72253	2.9789	2.01665
chr10	12727855	12728522	91	4.25291	10.9416	9.17412
chr10	13272888	13273277	188	6.52477	20.8564	18.8958
chr10	13434465	13434633	147	4.89426	16.3871	14.7875
chr10	13737828	13738140	26	1.45339	3.29086	2.69502
chr10	16898453	16898699	98	4.32	11.7887	9.80591
chr10	17775205	17775902	23	2.29396	3.81023	2.34091
chr10	18189246	18189676	12	1.83293	2.66381	1.2641
chr10	19029656	19030140	53	4.20484	7.11799	5.30728
chr10	19627099	19628011	17	2.42666	3.32202	1.78385
chr10	19890289	19890583	15	2.92431	3.59388	1.57146
chr10	20032190	20032563	61	4.52968	8.11682	6.13496
chr10	20442896	20443229	29	3.48754	4.96518	2.98887
chr10	20635460	20635778	12	2.42881	2.86278	1.24757
chr10	20655065	20655467	7	2.10385	2.30457	0.74928
chr10	20671689	20673125	11	2.34633	2.74861	1.10076
chr10	20908853	20909028	32	3.9451	5.50236	3.24235
chr10	21015645	21016179	10	2.14634	2.74189	1.07122
chr10	21185290	21185540	17	2.5867	3.28808	1.72414
chr10	21308344	21308641	12	1.99346	2.42425	1.21902
chr10	21643285	21643649	52	4.26331	6.96269	5.24594
chr10	21713894	21714504	39	3.44763	5.74527	3.98865
chr10	21715227	21715444	6	2.02783	2.16797	0.64905
chr10	22328570	22329158	25	2.60968	3.79549	2.54883
chr10	22466091	22466476	9	2.45148	2.7868	0.9904
chr10	22706443	22706611	12	3.02888	3.50636	1.21712
chr10	23200336	23200638	55	4.4295	7.1955	5.50746
chr10	23394520	23394952	82	5.02547	10.1741	8.25473
chr10	23683311	23683542	73	4.39835	9.17896	7.34759
chr10	23868913	23869081	110	7.0613	13.6059	11.0501
chr10	23948021	23948397	52	4.10917	7.08058	5.28344
chr10	23955652	23955926	5	1.83285	1.92372	0.54454
chr10	24402483	24402876	9	2.17629	2.44702	0.90617
chr10	24538853	24539159	8	1.99107	2.24846	0.86959
chr10	24743493	24744066	32	3.57626	5.1726	3.20203
chr10	25091638	25091916	79	4.21808	9.97097	7.92449
chr10	26096102	26096626	402	10.7274	42.4143	40.2246
chr10	26472693	26472861	482	12.0897	50.4939	48.2953
chr10	27794580	27794861	674	15.7632	69.5604	67.4409
chr10	28026456	28026864	1024	25.1688	104.991	102.473
chr10	28867261	28867474	1258	36.196	128.231	125.865
chr10	28993110	28993773	1133	33.063	115.481	113.317
chr10	29081337	29081610	1207	36.0357	123.211	120.712
chr10	30320241	30320623	1022	32.8547	105.28	102.24
chr10	30338027	30338228	492	18.0433	51.7073	49.2247
chr10	31033421	31033715	112	6.29007	13.0473	11.2022
chr10	33739398	33739770	10	2.80985	3.21784	1.07714
chr10	33955218	33955510	59	4.46034	7.63004	5.90776
chr10	34017216	34017785	92	6.17461	11.3079	9.22155
chr10	34124288	34124554	8	1.91701	2.3312	0.8313
chr10	34137755	34138220	41	2.97633	5.83383	4.18168
chr10	36856851	36858896	267	10.009	28.9691	26.7797
chr10	36859627	36860925	254	9.13351	27.413	25.4095
chr10	36892014	36892358	317	11.9961	34.5866	31.7093
chr10	36983424	36983734	173	7.67927	19.5263	17.3403
chr10	38100359	38100684	14	2.36901	3.05245	1.47577
chr10	38748098	38748472	7	1.98996	2.17701	0.75098
chr10	38885452	38885628	40	4.0802	6.12053	4.02304
chr10	38891047	38891335	37	3.64493	5.63818	3.78465
chr10	39010840	39011043	6	1.57878	1.66879	0.65194
chr10	39109125	39109293	22	2.70214	3.62649	2.25346
chr10	39201840	39202008	32	3.93208	5.39263	3.23962
chr10	39365817	39366017	12	2.70423	3.16437	1.25934
chr10	39379265	39380150	41	3.60928	5.80816	4.15656
chr10	39392417	39392856	134	7.44461	15.4348	13.4592
chr10	39394692	39394946	270	12.3399	29.4017	27.0268
chr10	39451516	39451729	207	9.06789	22.3245	20.7243
chr10	39611272	39611572	462	18.9659	48.7502	46.2641
chr10	39679821	39680211	427	16.8787	44.7493	42.7277
chr10	39966626	39967222	99	5.32654	11.9067	9.99249
chr10	39976812	39978473	92	5.4015	11.2182	9.29675
chr10	40021868	40022745	49	3.87557	6.75365	4.92609
chr10	40166507	40167321	85	6.12891	10.7538	8.59471
chr10	40219717	40219906	15	2.54202	3.14704	1.5501
chr10	40236334	40236510	33	3.80048	5.37421	3.33216
chr10	40239491	40239892	38	3.77792	5.74663	3.89556
chr10	40602773	40602983	6	1.33167	2.12791	0.66808
chr10	40604302	40604563	5	1.38531	1.80505	0.54321
chr10	41022715	41023750	33	3.42942	5.10196	3.31513
chr10	41210124	41210319	45	4.16848	6.48706	4.52589
chr10	41239257	41239800	24	3.06618	4.18384	2.4577
chr10	41468783	41469090	35	3.53342	5.28636	3.58971
chr10	41529732	41530936	16	2.84068	3.5015	1.67413
chr10	41970977	41971168	11	2.20188	2.62527	1.18071
chr10	41995052	41995300	52	5.10569	7.83633	5.26672
chr10	41996067	41996270	22	2.85646	3.90885	2.22585
chr10	42067187	42067465	17	2.51076	3.18691	1.75377
chr10	42197981	42198520	32	3.48617	5.01703	3.21354
chr10	42399496	42399727	8	2.162	2.39419	0.84588
chr10	42893777	42894296	6	1.86697	1.9981	0.62349
chr10	42941038	42941551	20	2.83871	3.79668	2.05232
chr10	43298148	43298499	15	2.83941	3.48937	1.59331
chr10	43621240	43621857	55	4.07565	7.45487	5.57428
chr10	43838504	43838750	26	3.15884	4.56092	2.66596
chr10	43845459	43845751	61	4.70133	8.57562	6.18686
chr10	43988108	43988383	14	2.22907	3.19516	1.45116
chr10	44176893	44177203	8	1.78859	2.05233	0.8125
chr10	44178561	44178789	6	1.91106	2.11553	0.61643
chr10	44179543	44179774	13	2.13141	2.91566	1.30101
chr10	44182700	44182868	16	2.35094	3.07484	1.61196
chr10	44717228	44717558	9	2.35608	2.66619	0.9688
chr10	44720719	44720954	8	2.20304	2.43297	0.81767
chr10	49436858	49437065	12	2.88897	3.42928	1.21634
chr10	49502621	49503502	10	2.54724	2.99464	1.07431
chr10	51953945	51954163	15	3.0185	3.90708	1.5859
chr10	52023596	52023777	27	3.16067	4.68473	2.70945
chr10	52101551	52102237	54	4.06218	7.43009	5.4332
chr10	52136932	52137950	19	2.77258	3.61797	1.91902
chr10	52265556	52265817	40	3.05027	5.46189	4.01384
chr10	52468110	52468450	98	6.32944	12.6461	9.81598
chr10	53259763	53260209	54	3.78338	7.0935	5.41377
chr10	53315976	53317545	20	2.93013	3.86681	2.08433
chr10	53318490	53318752	68	4.83923	8.44783	6.88423
chr10	57251981	57252490	102	6.22916	12.3773	10.2086
chr10	57464138	57464539	18	2.86216	3.64029	1.89134
chr10	57548534	57548960	10	2.33258	2.68028	1.04515
chr10	57695069	57695268	10	2.51022	2.87112	1.04578
chr10	57786091	57786379	15	2.29423	2.90603	1.52915
chr10	57801147	57801355	9	2.0486	2.37177	0.97238
chr10	57909232	57909829	56	4.34816	7.44687	5.60506
chr10	58063696	58064703	10	2.37742	2.74648	1.05743
chr10	58125989	58126157	6	1.75098	1.90124	0.69582
chr10	58645136	58645344	72	4.2116	9.41176	7.21012
chr10	58683890	58684814	62	3.338	7.81209	6.2754
chr10	58786741	58787181	132	5.98256	15.745	13.2273
chr10	58933237	58933608	112	5.46568	13.2389	11.2963
chr10	59079373	59079541	169	7.78248	19.0637	16.9901
chr10	59165230	59165454	152	7.93085	17.33	15.2317
chr10	59222508	59222778	81	5.16052	9.79896	8.15898
chr10	59342273	59342469	17	2.47358	3.26115	1.77268
chr10	59355561	59356038	19	2.54065	3.42883	1.94873
chr10	59465078	59465925	13	2.42142	2.91357	1.36706
chr10	59569157	59569399	9	2.42791	2.77023	0.97237
chr10	59678193	59678482	34	3.04273	5.10746	3.40617
chr10	59748538	59749193	12	2.54982	3.11385	1.26411
chr10	60608649	60608831	84	4.29568	10.4197	8.44338
chr10	60610502	60610771	259	9.38167	28.6094	25.9939
chr10	60690253	60690424	210	6.94863	22.3221	21.0045
chr10	60740701	60741023	587	16.5747	61.0786	58.7886
chr10	60835272	60835528	1079	27.0215	110.757	107.938
chr10	60842874	60843107	1240	29.5033	126.768	124.054
chr10	60914961	60915671	1348	31.6877	137.584	134.859
chr10	60985002	60985302	1300	32.3455	132.357	130.09
chr10	61111552	61111744	1324	32.2895	134.619	132.449
chr10	61158178	61158370	1670	40.8868	169.782	167.065
chr10	61245504	61246835	1152	30.5287	117.864	115.279
chr10	61912410	61913101	186	6.75317	20.1848	18.6944
chr10	61982015	61982202	239	9.2894	26.2145	23.929
chr10	62041067	62041625	177	7.79458	19.7491	17.7094
chr10	62254783	62255490	1039	27.3967	106.411	103.988
chr10	62327789	62328188	2505	67.6066	253.78	250.525
chr10	62383263	62383585	1942	53.7564	197.237	194.288
chr10	62409692	62409986	1541	43.8202	156.787	154.183
chr10	62443032	62443278	1582	45.7073	161.099	158.278
chr10	62485882	62487519	746	25.306	77.1976	74.6524
chr10	62801562	62801837	179	9.82455	20.2893	17.9712
chr10	62849271	62849492	42	4.18213	6.31455	4.20767
chr10	63440942	63441321	13	2.70777	3.41149	1.38434
chr10	66384009	66384642	126	5.38557	14.9255	12.6734
chr10	66457353	66457637	73	3.75955	9.76914	7.34624
chr10	66524472	66524942	21	2.32956	4.19864	2.1902
chr10	66545251	66545419	9	1.43867	2.08364	0.98548
chr10	66589869	66590071	10	2.06391	2.65915	1.08417
chr10	66710025	66710293	13	2.47725	2.98385	1.37145
chr10	66823684	66823904	12	2.46436	2.93551	1.27991
chr10	66923589	66923757	11	2.71463	3.1699	1.141
chr10	67011358	67012224	19	2.7551	3.57323	1.98579
chr10	67299272	67299454	24	2.98273	4.03123	2.48102
chr10	67417179	67417354	10	2.63551	3.1557	1.03827
chr10	67428965	67429355	31	3.03785	4.66605	3.1331
chr10	67599181	67599700	23	3.07728	4.26202	2.31795
chr10	67655812	67656021	28	3.14968	4.57737	2.83247
chr10	68928376	68928772	6	1.75486	1.85051	0.6032
chr10	69057172	69057480	10	2.49504	2.84394	1.04473
chr10	69558380	69558548	75	6.11548	10.078	7.58108
chr10	69657827	69658142	141	8.02889	16.4155	14.1439
chr10	69759660	69759934	454	17.3864	47.8097	45.4911
chr10	69831658	69831872	657	21.7155	68.0523	65.712
chr10	69842834	69843171	862	26.8266	88.6867	86.2494
chr10	69983163	69983333	818	25.2985	83.8475	81.8846
chr10	70179365	70179533	1873	57.7032	190.908	187.384
chr10	70644280	70644579	1205	36.8645	123.273	120.56
chr10	71771831	71772084	849	27.9652	87.5288	84.9932
chr10	72117510	72117804	506	18.2659	53.1242	50.6866
chr10	73289231	73289542	91	4.6722	10.2925	9.11644
chr10	73823650	73824149	50	3.25217	6.09738	5.02246
chr10	74583847	74584100	132	8.39447	16.1745	13.2043
chr10	74807165	74807525	29	3.66029	5.1432	2.94017
chr10	74836679	74836975	11	1.70263	2.18977	1.13232
chr10	74903689	74903866	13	2.65584	3.27871	1.34709
chr10	74980544	74980712	9	2.28897	2.73875	0.95886
chr10	75021286	75021518	21	2.60795	3.62924	2.16794
chr10	75110286	75110459	11	2.10415	2.87264	1.12931
chr10	75130088	75130911	14	1.92351	2.78412	1.42312
chr10	75149582	75149802	48	3.4199	6.78079	4.83887
chr10	75166786	75167250	158	6.56045	18.1871	15.8096
chr10	75290317	75290654	115	5.84603	13.5899	11.5041
chr10	75383860	75384346	17	2.36582	3.25075	1.73364
chr10	75494939	75495293	9	1.98844	2.25635	0.95013
chr10	75904949	75905421	18	2.64281	3.54801	1.84001
chr10	76277617	76277866	30	3.61156	5.23879	3.04177
chr10	76721916	76722324	20	2.81611	3.83865	2.07529
chr10	76978562	76978748	76	4.83145	9.49584	7.62249
chr10	77084865	77086269	268	10.3958	28.8877	26.8753
chr10	77090464	77090632	768	25.829	80.2562	76.8204
chr10	77101715	77101975	429	14.4684	44.9965	42.976
chr10	77632318	77632619	212	8.12756	23.5612	21.2786
chr10	77768833	77769048	15	2.04325	3.16264	1.59821
chr10	77927388	77927771	18	2.74413	3.52349	1.84099
chr10	78033315	78033489	5	1.85883	1.96171	0.59191
chr10	78560138	78560541	206	8.76985	22.5105	20.6167
chr10	79131510	79133438	364	11.9513	38.541	36.4925
chr10	79144507	79144675	322	9.52573	34.5282	32.2291
chr10	79167120	79167399	420	12.4267	44.0623	42.0284
chr10	79306305	79306518	622	17.0679	64.4883	62.2744
chr10	79316130	79317651	380	11.7953	40.1803	38.005
chr10	79422656	79423350	14	2.4847	3.05378	1.45073
chr10	79446586	79447125	11	2.34255	2.80462	1.12666
chr10	79509958	79510481	49	4.06178	6.64188	4.93508
chr10	79565260	79565632	31	3.48787	4.96806	3.12372
chr10	79578336	79578894	33	2.89807	5.08047	3.31994
chr10	79600940	79601192	114	5.30155	13.4342	11.4746
chr10	79611822	79612205	116	6.33269	13.7662	11.6463
chr10	79630668	79631236	88	4.76845	10.8681	8.83433
chr10	79688992	79689160	178	5.8843	19.7873	17.8226
chr10	79711997	79713005	72	3.96031	8.9673	7.25887
chr10	79755089	79755366	87	5.62429	10.7022	8.75959
chr10	79862496	79862679	107	5.15938	12.8846	10.7781
chr10	80005373	80005612	77	4.27866	9.34523	7.7078
chr10	80023908	80024554	29	3.12792	4.74523	2.97006
chr10	80084882	80085205	14	2.60106	3.20879	1.45565
chr10	80118903	80119431	61	4.13525	7.9949	6.15802
chr10	80140772	80141199	50	3.73332	6.61919	5.00793
chr10	80204369	80205313	31	3.30544	4.91292	3.12657
chr10	80217748	80218140	31	2.79261	4.66214	3.10274
chr10	80260904	80261454	47	3.22313	5.96009	4.77665
chr10	80289031	80289713	67	4.28916	8.53179	6.79687
chr10	80307846	80308014	267	11.4735	29.6352	26.731
chr10	80317542	80318226	124	5.89652	14.4367	12.4868
chr10	80363457	80363768	69	5.30557	9.01827	6.97125
chr10	80380734	80381180	75	4.83283	9.3272	7.57948
chr10	80418504	80418833	11	2.45324	2.85253	1.15724
chr10	80493696	80494085	11	2.4064	2.80138	1.17589
chr10	80630288	80630673	15	2.48011	3.11632	1.52403
chr10	80639268	80639746	17	2.5765	3.27619	1.72336
chr10	80729420	80729740	16	2.5498	3.38508	1.67498
chr10	80783320	80783529	22	2.52733	3.76836	2.23013
chr10	80841099	80841277	11	2.35139	2.91443	1.16516
chr10	80846765	80847550	27	3.14979	4.63282	2.7766
chr10	80874365	80874975	31	3.22138	4.9763	3.18372
chr10	80879644	80879817	4	1.51584	1.52206	0.46079
chr10	80893037	80893340	12	2.40932	2.9856	1.29874
chr10	80895545	80896114	23	2.63507	4.06399	2.36548
chr10	80898193	80898489	44	3.43546	6.18899	4.48557
chr10	80959132	80959593	15	2.6097	3.53142	1.50328
chr10	81111645	81111861	14	2.26267	2.81842	1.45371
chr10	81233846	81234032	20	2.95631	4.09514	2.0437
chr10	81545963	81546151	7	1.56983	1.72103	0.73375
chr10	81590693	81590861	9	2.36078	2.67366	0.98164
chr10	81703788	81704166	23	3.23246	4.23621	2.3001
chr10	81817022	81817327	10	2.14425	2.53819	1.05149
chr10	82161646	82162164	34	3.33898	5.29671	3.45468
chr10	82225911	82226949	68	4.60726	8.55782	6.88248
chr10	82323220	82323553	265	11.3483	29.0939	26.5343
chr10	82417818	82418017	113	5.29036	13.0518	11.3924
chr10	82605836	82606059	90	4.7206	11.2744	9.0514
chr10	82640185	82640897	48	3.09109	6.50174	4.85435
chr10	82724279	82724467	29	3.28048	4.95397	2.90801
chr10	82763897	82764590	10	2.61073	2.9958	1.00731
chr10	83006298	83006886	26	2.91427	4.44787	2.68109
chr10	83111405	83111673	110	5.75327	13.0154	11.0136
chr10	83391936	83392272	221	9.02229	24.2496	22.1695
chr10	83417221	83417389	293	10.6862	31.3575	29.3309
chr10	84109364	84109682	479	15.3823	50.2321	47.9454
chr10	84173084	84173890	275	9.97797	29.2671	27.5709
chr10	84218669	84219062	232	9.39681	25.2007	23.2391
chr10	84371325	84371692	102	5.52482	11.8756	10.2414
chr10	84485458	84486211	67	4.98047	8.91251	6.78388
chr10	84506916	84507103	38	3.82438	5.85502	3.80036
chr10	84646341	84646658	18	2.84558	3.65097	1.82628
chr10	84648030	84648903	62	4.88212	8.24685	6.27244
chr10	85054936	85055119	166	9.05385	18.7934	16.6282
chr10	85416271	85416572	126	7.21848	14.605	12.6405
chr10	85786421	85786702	124	6.2088	14.5134	12.4638
chr10	86270843	86271099	158	6.01344	17.5232	15.8578
chr10	86282151	86282494	210	6.5877	22.8089	21.0982
chr10	86910599	86910876	495	13.6229	51.8952	49.5571
chr10	86951577	86951829	653	18.6357	68.1331	65.3854
chr10	86954155	86954386	511	15.0471	53.4152	51.1498
chr10	86955784	86956252	531	16.1469	55.719	53.1271
chr10	87663838	87664082	411	15.3517	43.3281	41.1262
chr10	87790216	87790387	356	14.1127	37.7745	35.6388
chr10	87843174	87843349	408	17.6092	43.8933	40.8673
chr10	88289252	88289788	152	7.59147	17.3528	15.2884
chr10	89194746	89195014	55	4.61316	7.61045	5.54848
chr10	89207572	89208127	15	2.44838	3.08217	1.52805
chr10	90129645	90130102	117	6.60728	14.4384	11.7633
chr10	90586503	90586818	171	8.18655	19.2568	17.1162
chr10	90634355	90634913	61	4.01792	7.96692	6.10004
chr10	90644150	90644946	91	5.32774	10.9924	9.11264
chr10	90650782	90651074	80	4.54004	9.8042	8.0436
chr10	91158275	91158572	29	2.7161	4.21969	2.98212
chr10	91182293	91183259	14	2.42104	3.02523	1.47973
chr10	91415350	91415518	68	4.65498	8.31548	6.80869
chr10	91625227	91625944	123	6.79779	14.1636	12.3857
chr10	92544230	92544413	54	4.44933	7.40934	5.4231
chr10	92623609	92623873	12	2.34077	2.86012	1.21991
chr10	92718103	92718486	95	6.39936	12.2333	9.54455
chr10	92738246	92738572	121	7.06107	14.649	12.1261
chr10	92771882	92772077	33	2.43464	4.42875	3.31925
chr10	92915119	92916237	20	2.25693	3.74012	2.02661
chr10	93052131	93052632	12	2.52854	2.98929	1.25868
chr10	93056987	93057201	8	2.62184	2.91645	0.88186
chr10	93234085	93234834	17	2.71313	3.48884	1.76023
chr10	93296452	93296781	58	4.24858	7.89389	5.88827
chr10	93346169	93346810	52	3.38479	7.22481	5.283
chr10	93351823	93352587	30	2.75306	4.62301	3.04445
chr10	93592630	93593090	33	3.13947	4.66893	3.34489
chr10	93693356	93693638	23	3.1933	4.21896	2.38609
chr10	93878865	93879499	18	3.03611	3.77685	1.8409
chr10	94602522	94602692	8	1.54899	1.70793	0.81084
chr10	94605462	94605722	6	1.84957	2.08826	0.69274
chr10	94786207	94787142	28	2.89337	4.48461	2.83388
chr10	94908078	94908300	6	2.0044	2.13714	0.63261
chr10	94964108	94964698	9	2.25018	2.57907	0.99043
chr10	94977708	94978048	7	2.26259	2.48598	0.7893
chr10	95014616	95014838	19	2.64732	3.47664	1.90931
chr10	95025939	95026150	54	4.7726	7.54451	5.4662
chr10	95192743	95192938	12	2.71148	3.19554	1.24471
chr10	95280561	95280768	20	2.812	3.67342	2.02876
chr10	96214545	96214753	8	2.2457	2.48448	0.81997
chr10	96706770	96707014	10	2.98834	3.39083	1.04796
chr10	97889878	97890046	13	2.70281	3.497	1.32061
chr10	98599083	98599346	8	2.14989	2.39076	0.83188
chr10	98634675	98634854	76	5.6495	9.84284	7.69386
chr10	98727996	98728239	134	7.12664	15.1326	13.4438
chr10	99622852	99623205	129	8.51415	15.7964	12.9449
chr10	99950022	99950777	45	4.02632	6.38765	4.5783
chr10	105011003	105012527	62	3.90456	7.86867	6.22773
chr10	105076192	105076709	91	5.80491	11.1219	9.14227
chr10	105278189	105278861	14	2.35631	3.02776	1.43861
chr10	106847251	106847419	33	3.91823	5.4534	3.32107
chr10	107570362	107570652	7	2.09597	2.30128	0.74311
chr10	107599414	107599696	31	3.70793	5.1544	3.15804
chr10	107769797	107770060	30	3.29331	4.84493	3.00662
chr10	109629141	109629312	142	8.17618	16.8091	14.2714
chr10	109993609	109993866	39	3.47033	5.64481	3.99101
chr10	110446474	110447216	12	2.31459	2.74455	1.22633
chr10	110735644	110735952	17	2.7613	3.45831	1.70031
chr10	110909907	110910188	12	2.98184	3.56744	1.29591
chr10	110976872	110977169	11	2.39191	2.81684	1.10098
chr10	111037873	111038041	19	2.60838	3.35291	1.9069
chr10	111102847	111103163	11	2.34553	2.77718	1.1791
chr10	111304287	111304920	45	4.52983	6.91925	4.56495
chr10	111409719	111410028	15	2.15114	2.79602	1.58038
chr10	112365618	112366109	18	2.67379	3.45165	1.80923
chr10	114688251	114688699	42	3.67732	6.18314	4.28709
chr10	114752458	114752815	75	4.79103	9.47844	7.54824
chr10	114821279	114822016	55	3.67299	7.30191	5.56993
chr10	114825158	114825379	233	7.36098	25.2931	23.3428
chr10	114905811	114906215	295	8.70028	31.3591	29.5754
chr10	115008235	115008626	484	13.3897	50.91	48.4785
chr10	115174165	115174460	340	9.62307	36.1725	34.0101
chr10	115187359	115187592	394	11.8071	42.1618	39.4119
chr10	115201185	115201491	339	11.5621	36.8488	33.9028
chr10	115799245	115800039	99	4.82473	11.9794	9.95442
chr10	115924188	115924401	5	1.72819	1.83683	0.55042
chr10	116018369	116018829	14	2.46822	3.04347	1.41563
chr10	116205427	116205959	17	2.27226	3.37675	1.7109
chr10	116290628	116290837	35	2.58883	5.51733	3.58963
chr10	116500356	116500525	74	3.05574	9.00651	7.42551
chr10	116532024	116532370	101	4.63007	11.9662	10.1124
chr10	116661255	116662364	25	2.82859	4.39127	2.51389
chr10	116813102	116814311	18	2.77265	3.66635	1.89429
chr10	117485825	117486667	25	3.96335	5.08835	2.51102
chr10	117578618	117578919	17	2.50479	3.202	1.77255
chr10	118491725	118492138	55	4.14535	7.20169	5.54627
chr10	118676976	118677664	9	2.60644	2.93992	0.97006
chr10	119645655	119646011	159	6.42576	18.0489	15.9808
chr10	119814659	119814957	258	8.73879	28.1999	25.8501
chr10	119824883	119825555	183	6.70745	20.8764	18.363
chr10	120416204	120416555	26	3.12266	4.50851	2.67923
chr10	120492591	120492877	97	5.73914	11.6509	9.73219
chr10	120643107	120643608	41	3.32893	5.56553	4.17478
chr10	120942289	120942962	12	2.45903	3.00741	1.27413
chr10	121063292	121063623	29	2.92613	4.48313	2.93339
chr10	121273986	121274806	96	4.40774	11.2476	9.69864
chr10	121533592	121534520	174	5.99028	19.2569	17.4633
chr10	122324617	122325024	443	11.7447	46.7107	44.3451
chr10	122331566	122332383	447	14.8527	47.1619	44.7054
chr10	122423117	122423619	114	6.21081	13.2461	11.4998
chr10	122513283	122513574	44	3.91483	6.3447	4.47675
chr10	122633804	122634138	451	17.3604	47.6884	45.1554
chr10	123014772	123015060	992	31.9166	102.118	99.2237
chr10	125023989	125024190	1429	43.0104	146.164	142.947
chr10	125963442	125963913	2186	62.8172	222.678	218.61
chr10	126265152	126265873	1050	29.5672	106.985	105.075
chr10	126423763	126424115	1948	49.4298	197.704	194.87
chr10	126478731	126479192	2279	58.118	230.947	227.975
chr10	126500251	126500884	2850	72.929	288.717	285.065
chr10	126557858	126558386	2178	46.4219	220.751	217.825
chr10	126632731	126633170	2086	45.4714	211.346	208.609
chr10	126693199	126693468	2372	54.0348	240.358	237.271
chr10	126703167	126703410	2099	48.5439	212.82	209.985
chr10	126721334	126721502	1850	43.5017	187.7	185.067
chr10	126748855	126749509	1803	43.3955	183.103	180.34
chr10	126948921	126949238	1445	35.4378	146.957	144.567
chr10	127113999	127114273	1161	30.2542	118.291	116.137
chr10	127374849	127375067	1029	28.5668	105.271	102.988
chr10	127452192	127452450	1007	28.9517	103.237	100.707
chr10	127472468	127473042	407	13.8026	43.0305	40.774
chr10	127495950	127496891	101	4.70154	11.3436	10.1314
chr10	127520219	127520944	58	3.95711	7.65308	5.82991
chr10	127533737	127534128	13	2.45326	3.10837	1.31921
chr10	127648601	127649062	31	2.83045	4.80839	3.14421
chr10	127759340	127759532	225	9.27438	24.7453	22.5592
chr10	127806168	127806397	536	17.4064	56.1923	53.6956
chr10	127814811	127814994	455	14.6691	47.5087	45.5515
chr10	127825153	127825448	760	21.3077	78.8039	76.0612
chr10	127848921	127849374	766	17.7099	79.3736	76.6147
chr10	127892240	127892614	952	22.7364	97.735	95.2475
chr10	127930376	127931216	1398	25.8467	142.395	139.845
chr10	127936368	127936624	2053	36.7585	208.592	205.339
chr10	127985893	127986341	1382	29.8932	140.922	138.251
chr10	128063480	128064296	620	18.6005	64.2137	62.0874
chr10	128185318	128186014	680	20.982	70.6591	68.0843
chr10	128258780	128259260	315	12.1211	33.717	31.5761
chr10	129665427	129665680	65	4.91676	8.37726	6.52175
chr11	3000269	3004682	34	3.10237	5.23117	3.47209
chr11	3023443	3024117	26	2.62207	4.58638	2.6979
chr11	3036914	3037466	20	2.40989	3.77032	2.09719
chr11	3043028	3043283	116	4.62535	13.773	11.6314
chr11	3044433	3044764	76	3.44818	9.34042	7.60735
chr11	3046184	3046817	79	3.55804	9.95391	7.99321
chr11	3061113	3061519	11	1.35432	2.8966	1.18915
chr11	3062887	3063253	12	1.45258	2.99586	1.26144
chr11	3064811	3066634	8	1.36353	2.4941	0.8866
chr11	3067308	3067621	10	1.40755	2.83363	1.06346
chr11	3070765	3071701	12	1.37538	2.85579	1.23266
chr11	3077112	3078118	7	1.35469	2.46026	0.79722
chr11	3079018	3079989	9	1.32288	2.58368	0.97255
chr11	3081270	3082482	23	1.62005	4.15182	2.37163
chr11	3093084	3094289	11	1.35947	2.79164	1.10757
chr11	3166152	3166513	12	1.35939	2.93361	1.20178
chr11	3188558	3190055	9	1.42409	2.64106	0.97593
chr11	3296723	3296961	9	1.34172	2.43676	0.98578
chr11	3384273	3384632	11	1.45416	2.72663	1.10002
chr11	3435847	3436072	9	1.5942	2.83234	0.96387
chr11	3548840	3549779	8	1.45281	2.54113	0.85909
chr11	3795103	3795271	11	1.32082	2.52178	1.19414
chr11	3996537	3997007	15	1.5731	3.32429	1.5693
chr11	4060208	4060725	11	1.56569	2.84899	1.17937
chr11	4494278	4494964	12	1.56361	3.02885	1.25273
chr11	4604078	4604448	8	1.36159	2.46339	0.82969
chr11	4702909	4703755	8	1.30597	2.22433	0.82271
chr11	4748755	4749048	9	1.31318	2.28508	0.91115
chr11	4773862	4774140	11	1.5235	2.7546	1.12068
chr11	4795221	4795407	11	1.37774	2.46917	1.10299
chr11	4851778	4852082	7	1.45863	2.37588	0.78099
chr11	4998786	4999209	11	1.56918	2.84686	1.1651
chr11	4999890	5000211	10	1.55534	2.72705	1.03545
chr11	5065828	5065996	6	1.34799	2.08411	0.60913
chr11	5180961	5181254	7	1.25819	2.01253	0.70573
chr11	5214891	5215068	7	1.29738	2.49695	0.76848
chr11	5385283	5385477	14	1.13124	2.82538	1.43046
chr11	5390563	5390862	33	1.58719	5.48698	3.36076
chr11	5442076	5442542	24	1.52275	4.29662	2.49299
chr11	5607513	5607814	9	1.35853	2.6202	0.99748
chr11	5640804	5641229	11	1.72609	3.4566	1.11416
chr11	5688054	5688598	11	1.39446	2.78843	1.14845
chr11	5736239	5736417	15	1.45734	3.23225	1.58201
chr11	5930808	5930985	11	1.14744	2.28174	1.14908
chr11	6019176	6019515	36	2.12225	6.12728	3.66878
chr11	6087617	6087809	30	1.64377	4.6689	3.01388
chr11	6100074	6100605	20	1.59447	3.70319	2.00843
chr11	6167614	6167902	50	2.21952	7.16937	5.09413
chr11	6174730	6174968	48	2.16447	6.87953	4.81434
chr11	6192475	6192681	32	1.84434	5.09821	3.24429
chr11	6288810	6289395	10	1.22809	2.25415	1.03863
chr11	6315327	6316775	34	2.75599	5.23253	3.41095
chr11	6428502	6428924	49	3.64398	6.86336	4.91619
chr11	6446345	6446723	67	3.91173	8.60853	6.70197
chr11	6525795	6526505	30	2.98298	4.77523	3.05267
chr11	7113171	7113508	11	2.38509	2.81654	1.15968
chr11	8047505	8048459	9	1.77223	2.35301	0.95717
chr11	8910953	8911297	107	5.52024	12.7761	10.7173
chr11	11720331	11720643	56	3.30745	7.45637	5.64731
chr11	12131414	12131692	11	2.44695	3.02114	1.15611
chr11	16157481	16157693	8	2.38295	2.64185	0.83381
chr11	16491351	16491717	9	2.1343	2.43481	0.91667
chr11	16527764	16528165	70	5.15559	9.32434	7.00889
chr11	16570137	16570379	150	7.08761	17.3965	15.0805
chr11	17059000	17059242	348	11.1308	36.7947	34.8116
chr11	17111430	17111886	669	19.2565	69.6136	66.9962
chr11	17157839	17158022	626	18.0437	64.7137	62.6028
chr11	17206155	17206452	857	23.3072	88.1425	85.7883
chr11	17851239	17851540	862	22.3178	88.2489	86.2311
chr11	17853477	17854078	1784	44.7871	181.528	178.485
chr11	18196723	18197025	1366	37.0841	139.369	136.609
chr11	18481088	18481862	899	26.1457	92.3291	89.9688
chr11	18914487	18915563	399	13.8945	42.3557	39.9546
chr11	18918749	18919163	34	2.92657	5.04089	3.41016
chr11	19012224	19012504	193	7.3074	21.598	19.347
chr11	19104133	19105484	283	9.70544	30.3289	28.3655
chr11	19423765	19424237	239	6.78356	25.9562	23.9134
chr11	19431139	19431773	175	5.57712	19.5742	17.5697
chr11	19631070	19631257	88	3.73167	10.681	8.80227
chr11	19661114	19661362	75	3.67668	9.30967	7.52117
chr11	19716389	19716591	29	1.94736	3.81079	2.97238
chr11	19824134	19825485	29	2.80027	4.53544	2.90007
chr11	20100889	20101641	27	3.2406	4.63196	2.76891
chr11	20149043	20149346	34	3.32239	5.20509	3.40548
chr11	20232909	20233435	89	5.30397	10.8444	8.93472
chr11	20352117	20352419	218	11.1632	24.4627	21.8163
chr11	20377530	20378144	190	10.1306	21.1609	19.0077
chr11	20431876	20432044	120	7.89388	14.4199	12.0506
chr11	20503535	20504485	15	2.5962	3.24245	1.59492
chr11	20555661	20556088	18	2.71962	3.64666	1.81805
chr11	20641401	20641991	28	2.98299	4.73597	2.84452
chr11	20730866	20731108	108	6.69571	12.978	10.8654
chr11	20758928	20759289	232	10.4809	25.2169	23.2325
chr11	20866930	20867151	282	11.3945	29.9641	28.2501
chr11	20891887	20892217	481	18.2288	50.4975	48.1373
chr11	21268592	21269591	862	27.7165	89.1158	86.2987
chr11	22247997	22248707	524	15.178	54.6781	52.4687
chr11	22412156	22413043	181	7.40977	20.2619	18.1926
chr11	22610636	22611145	31	3.34788	5.07588	3.17072
chr11	22882027	22882396	66	4.6366	8.42505	6.68431
chr11	22907683	22908666	542	16.9295	56.8789	54.295
chr11	23155976	23156215	369	12.1233	38.929	36.9715
chr11	23205723	23206687	198	9.43652	21.9739	19.8233
chr11	23794686	23795355	35	2.90287	5.1398	3.57515
chr11	24880337	24880748	27	3.1103	4.46824	2.73502
chr11	25000012	25000330	15	2.60422	3.22185	1.51269
chr11	26110480	26110708	19	3.16287	3.98434	1.98466
chr11	26286992	26287472	110	5.15432	13.0363	11.0654
chr11	28265514	28265734	469	14.4934	49.5208	46.9587
chr11	29030577	29031095	730	14.4548	75.463	73.0655
chr11	29072782	29073422	476	11.8367	49.7958	47.6535
chr11	29146991	29148005	63	4.26122	8.26381	6.35937
chr11	29414888	29415172	42	2.6454	6.07396	4.22327
chr11	29426192	29426574	28	2.66282	4.46294	2.83291
chr11	29447665	29447958	21	2.98203	4.0084	2.12133
chr11	29536644	29536959	8	2.16871	2.44375	0.87664
chr11	29592735	29594542	25	3.02813	4.29737	2.57387
chr11	29725427	29725611	198	10.3616	22.6188	19.8189
chr11	29926094	29926428	359	15.0965	38.4451	35.9215
chr11	30143372	30143963	239	10.4503	26.0972	23.9337
chr11	30167237	30167441	156	8.20051	17.6452	15.6426
chr11	30267460	30267628	188	10.4885	21.7381	18.8979
chr11	30549038	30549625	37	2.8479	5.54176	3.74318
chr11	31269061	31270089	120	4.33237	13.8774	12.0267
chr11	31543016	31543251	241	7.76398	27.0214	24.1759
chr11	31613117	31613467	170	6.06898	18.8133	17.097
chr11	31668199	31668987	205	8.23382	22.7157	20.547
chr11	31738489	31738791	147	7.18841	17.3418	14.775
chr11	31770114	31770993	249	8.71537	27.0134	24.9698
chr11	32036217	32036475	563	15.2413	58.2387	56.3035
chr11	32058086	32058307	726	20.3021	75.3709	72.6381
chr11	32231055	32231409	338	11.0548	35.9027	33.8597
chr11	32263710	32264036	282	11.1499	30.2584	28.2381
chr11	32542400	32543307	211	10.6727	24.0956	21.1318
chr11	32680875	32681389	97	5.96682	11.8385	9.73721
chr11	32841405	32841930	32	3.24559	5.0018	3.23687
chr11	32970571	32970840	28	3.24456	4.58269	2.87764
chr11	33062493	33063707	10	2.15841	2.63098	1.04608
chr11	33328319	33328610	5	1.79209	1.85966	0.54646
chr11	33413458	33413694	8	2.12553	2.49044	0.8856
chr11	34013074	34013256	10	2.61101	2.98664	1.0469
chr11	34298447	34298620	9	2.72817	3.15307	0.97045
chr11	35645965	35646266	41	3.43727	6.00754	4.15816
chr11	35740185	35741095	6	2.05494	2.21184	0.67703
chr11	35745359	35745570	9	2.55207	2.87979	0.95855
chr11	35746914	35747919	100	6.34354	12.1334	10.0844
chr11	35923033	35923201	20	2.0003	2.89231	2.0462
chr11	36479127	36479408	28	3.71942	5.03746	2.81363
chr11	36510616	36511239	15	3.0587	3.71799	1.50196
chr11	38014885	38015152	8	1.72826	1.91691	0.80126
chr11	43198572	43199519	7	2.24035	2.4716	0.78287
chr11	43383195	43383602	11	2.46274	2.87045	1.17755
chr11	43495231	43495748	57	4.40969	7.52228	5.71269
chr11	43560803	43561704	68	5.15492	8.92809	6.87867
chr11	43609389	43609758	44	3.75424	6.05783	4.46477
chr11	43645006	43645191	31	3.52291	5.42889	3.18895
chr11	43763520	43764244	27	2.65563	3.93808	2.72281
chr11	44332392	44332602	17	2.79322	3.46932	1.73245
chr11	44431767	44432049	10	2.51431	2.87336	1.03218
chr11	44515015	44515191	7	2.29809	2.55004	0.78579
chr11	44676708	44677523	14	2.98998	3.58772	1.48232
chr11	45695308	45695491	16	2.42109	3.60727	1.63608
chr11	45720868	45721044	19	2.50598	3.84155	1.91406
chr11	45758317	45758561	14	2.54836	3.25045	1.42037
chr11	45768821	45769096	9	2.14086	2.59345	0.97896
chr11	45793558	45794104	18	2.86745	3.92159	1.83708
chr11	45869446	45869689	23	3.06998	4.09318	2.38879
chr11	45879011	45879668	23	3.39535	4.43411	2.39331
chr11	45898176	45898391	24	3.17732	4.24165	2.48956
chr11	46880465	46880635	85	6.64176	11.4515	8.51326
chr11	47149719	47149887	140	8.1993	16.644	14.0691
chr11	48630018	48630208	300	12.1644	32.099	30.0191
chr11	49016954	49017662	400	13.1038	42.4882	40.0475
chr11	49526042	49526414	87	4.75986	10.6233	8.79678
chr11	49711233	49711401	16	3.14996	3.85737	1.68542
chr11	49988007	49988944	11	2.48283	2.90608	1.15093
chr11	50037800	50038118	53	4.04292	7.17924	5.35241
chr11	50105102	50106152	98	5.71624	11.5837	9.87732
chr11	50184909	50185262	100	5.83489	12.1744	10.0968
chr11	50190764	50191743	48	4.02154	6.66298	4.8079
chr11	50235546	50235761	5	1.83457	1.93845	0.56952
chr11	50244341	50244830	38	3.57842	5.56344	3.80815
chr11	51076483	51077064	30	3.24762	4.80066	3.03961
chr11	51398167	51398427	45	3.21655	6.19606	4.57287
chr11	51501454	51503213	162	6.31196	18.3704	16.2963
chr11	51569612	51569979	25	3.3114	4.87377	2.53444
chr11	51577063	51577417	46	3.84873	6.64143	4.64663
chr11	51670990	51671743	12	1.46102	2.15793	1.25411
chr11	51781114	51781288	13	2.65006	3.38743	1.32353
chr11	51912093	51913204	34	3.63095	5.3562	3.42855
chr11	52173907	52174282	70	4.98954	8.83751	7.06616
chr11	52209816	52210231	119	6.28613	13.9081	11.9338
chr11	52732727	52733503	441	15.9402	46.2149	44.1554
chr11	53137890	53138536	632	19.896	65.5386	63.2141
chr11	53165241	53165765	407	17.0386	43.4431	40.7047
chr11	53282924	53283408	165	7.943	18.1719	16.5767
chr11	53333229	53334128	36	3.06856	4.97127	3.63792
chr11	53663414	53663618	21	2.73119	3.86831	2.14312
chr11	53953744	53954116	15	2.65911	3.55593	1.59099
chr11	54125620	54125863	8	2.30064	2.64156	0.84396
chr11	54343938	54344480	10	3.01081	3.41735	1.05213
chr11	54524032	54524232	10	2.43675	2.83424	1.0874
chr11	54567981	54568514	9	2.32891	2.63111	0.94402
chr11	54601203	54601538	55	4.19391	7.22779	5.54094
chr11	54674064	54674711	150	7.54267	16.9557	15.0347
chr11	54679857	54680100	635	22.8351	66.197	63.5964
chr11	54828858	54829659	756	24.9486	77.9091	75.6158
chr11	54972349	54972791	892	19.5419	91.6728	89.2151
chr11	57435407	57435638	1111	19.4205	113.754	111.114
chr11	57470310	57471047	799	17.5024	82.3452	79.9864
chr11	57509711	57509928	575	16.8486	59.3669	57.5523
chr11	57747905	57748249	580	18.3775	60.1237	58.0481
chr11	57823324	57823569	504	18.2925	53.2469	50.4725
chr11	57985054	57985356	150	7.24789	16.9568	15.0354
chr11	58116188	58116488	8	2.10771	2.38143	0.87502
chr11	58143435	58144528	236	9.78585	25.5276	23.6037
chr11	58680544	58680893	106	6.61301	12.5342	10.6437
chr11	58717550	58717859	65	3.90416	8.28857	6.57991
chr11	58751885	58752639	237	9.91693	26.1643	23.7814
chr11	58791770	58791954	289	10.3169	30.674	28.9743
chr11	58977051	58977438	299	11.0036	31.9711	29.9063
chr11	59005122	59005365	196	8.45029	21.5775	19.6159
chr11	59021793	59021983	86	5.11791	10.5631	8.6356
chr11	59041357	59041933	17	2.58996	3.3856	1.76368
chr11	59521517	59522138	121	7.90264	14.4914	12.1501
chr11	59653073	59653681	123	7.569	14.4186	12.3676
chr11	59713710	59713969	40	4.06931	5.9984	4.04427
chr11	59761567	59761919	80	5.27462	10.1167	8.09832
chr11	59920447	59920638	40	3.59006	5.98028	4.08968
chr11	60022730	60023585	9	2.39079	2.69193	0.91906
chr11	60154999	60155167	16	2.97415	3.97974	1.61586
chr11	60230310	60231533	37	3.55674	5.73107	3.70831
chr11	60350650	60351977	176	9.43704	19.7979	17.6249
chr11	60590749	60591344	130	7.21205	15.0972	13.0816
chr11	60656152	60656577	138	6.51267	15.2664	13.8124
chr11	60691895	60692559	536	18.215	55.9454	53.6017
chr11	60745434	60745807	194	6.69078	20.8016	19.4486
chr11	60988870	60989207	67	3.42329	8.44061	6.79592
chr11	61003731	61003899	5	1.57401	1.66479	0.50361
chr11	61080219	61080513	7	2.11322	2.29147	0.70234
chr11	61221376	61222159	266	9.21598	28.6543	26.6652
chr11	61318263	61318802	440	9.5568	46.2343	44.0454
chr11	61342653	61343311	304	6.59472	32.6706	30.4727
chr11	61393025	61393353	131	4.55069	15.3124	13.1906
chr11	61575264	61575743	46	3.48167	6.57739	4.65891
chr11	61667839	61668140	290	10.5305	31.4111	29.0715
chr11	61743567	61743881	494	16.5282	51.934	49.4548
chr11	61882856	61883324	430	14.088	45.1772	43.0028
chr11	61920101	61920323	388	13.6845	41.1041	38.8678
chr11	62094290	62095032	159	7.26736	17.7585	15.9051
chr11	62126557	62126733	40	4.36933	6.68711	4.04934
chr11	62270078	62272167	195	7.98056	21.4312	19.5556
chr11	62388858	62389069	210	8.30641	23.1611	21.0469
chr11	62416209	62416490	44	3.38321	6.27529	4.44307
chr11	62418507	62418708	18	2.27442	3.10273	1.85035
chr11	62545018	62545312	111	6.06793	12.8617	11.1613
chr11	62602168	62602336	142	7.58596	16.1447	14.2441
chr11	62779987	62780503	53	4.11609	7.08506	5.3041
chr11	63892543	63893216	45	3.91344	6.28921	4.53391
chr11	64282218	64282591	11	2.20244	2.63825	1.16849
chr11	64304093	64304294	25	2.39284	3.74474	2.57412
chr11	64792433	64792709	58	4.44248	8.09504	5.85961
chr11	65601271	65601909	40	3.90278	5.9188	4.05458
chr11	66866003	66866271	8	1.98046	2.2461	0.8986
chr11	67395933	67396129	13	2.50153	3.09307	1.34012
chr11	67402025	67402633	88	5.42653	10.8258	8.80154
chr11	67779946	67780224	242	10.3689	26.1046	24.2874
chr11	67844272	67844627	287	10.3572	31.0355	28.7574
chr11	67863297	67863465	135	5.42013	14.9618	13.5883
chr11	68217753	68217980	209	9.243	22.706	20.9715
chr11	68505615	68505804	197	9.10356	21.5159	19.7287
chr11	68666002	68666761	218	10.3127	24.0011	21.8957
chr11	68714980	68715278	119	6.86264	13.9067	11.9438
chr11	68753236	68753574	41	3.98127	6.08777	4.17149
chr11	68801559	68801849	18	2.86416	3.6628	1.81506
chr11	68829479	68830169	15	2.571	3.29115	1.52472
chr11	68849292	68849672	18	2.79573	3.7382	1.8212
chr11	68859424	68859727	6	1.91759	2.06313	0.64896
chr11	68901886	68902396	16	2.74442	3.38438	1.64404
chr11	68931083	68931410	114	7.01791	13.4857	11.4026
chr11	69178532	69178745	257	10.8791	27.5261	25.7336
chr11	69245557	69245842	656	23.0854	68.1739	65.6837
chr11	69340586	69341199	877	28.1652	90.156	87.7799
chr11	69393537	69394812	1603	42.0266	163.068	160.398
chr11	69413718	69414102	1573	33.584	159.786	157.383
chr11	69435591	69435773	2005	42.3184	203.487	200.58
chr11	69475822	69476608	1230	35.2272	125.72	123.049
chr11	69484955	69486326	28	3.21352	4.56778	2.82667
chr11	69572022	69573152	10	2.23487	2.5808	1.01061
chr11	69597762	69598061	46	4.69793	6.90522	4.60748
chr11	69714911	69715277	17	3.1111	3.84771	1.76047
chr11	69735180	69735833	52	3.9938	6.93129	5.23699
chr11	69794070	69794491	248	8.76386	26.9296	24.8014
chr11	69814036	69814301	239	10.0761	26.0481	23.9759
chr11	69835337	69835520	223	9.386	24.9544	22.3052
chr11	70047686	70047860	95	5.03534	11.4175	9.57591
chr11	70223335	70223694	36	3.36135	5.39663	3.69189
chr11	70338726	70339406	20	2.89037	3.82327	2.07368
chr11	70353349	70353576	8	2.52558	2.8096	0.88508
chr11	70482512	70483041	63	4.50815	8.15168	6.31538
chr11	70501303	70501560	14	2.74054	3.34198	1.4872
chr11	70577799	70578039	29	3.32619	4.62469	2.9453
chr11	70637851	70638611	36	3.79763	5.49668	3.66437
chr11	70783120	70783819	27	3.31973	4.5638	2.74407
chr11	70832440	70833303	18	2.84506	3.62905	1.84133
chr11	71281978	71282146	8	2.50479	2.76572	0.83063
chr11	71571882	71572418	18	2.74532	3.56955	1.88859
chr11	71969009	71969177	9	1.92934	2.18678	0.91742
chr11	72028244	72028583	18	3.4013	4.20613	1.85344
chr11	72047655	72047875	18	3.44658	4.2421	1.84994
chr11	72156250	72156446	11	2.19963	2.54386	1.10274
chr11	72254721	72255031	81	4.37479	9.79255	8.12554
chr11	72382094	72382270	189	8.05062	20.9042	18.9178
chr11	72420047	72420837	61	3.79972	7.97671	6.1377
chr11	72503381	72503994	7	2.05938	2.23336	0.70957
chr11	72609000	72609825	19	2.68993	3.66736	1.91914
chr11	72861225	72861548	19	2.77143	3.68915	1.9547
chr11	72990293	72990688	48	3.95832	6.55468	4.80578
chr11	74466216	74466394	24	3.15288	4.26139	2.4169
chr11	74537000	74538230	15	2.43401	3.16155	1.51235
chr11	74584071	74584749	38	3.28351	5.67432	3.86264
chr11	74644256	74644626	20	2.6477	3.58048	2.07595
chr11	74711360	74711993	24	2.8714	4.19993	2.44532
chr11	74739308	74739524	9	2.3436	2.67777	0.9923
chr11	74992139	74992373	48	4.20921	6.77119	4.87394
chr11	75003772	75004150	112	6.78694	13.1996	11.2029
chr11	75154220	75154388	120	8.14328	14.5949	12.0196
chr11	75161868	75162106	75	6.19136	10.0026	7.51301
chr11	75300116	75301242	35	3.25493	5.39349	3.59293
chr11	75492521	75493038	208	9.31702	22.8516	20.886
chr11	75546266	75547158	134	7.05282	15.4276	13.4917
chr11	76015841	76016041	228	9.05424	25.2038	22.881
chr11	76030924	76031133	78	4.9586	9.76456	7.85106
chr11	76056499	76057582	98	4.9183	11.8405	9.85665
chr11	76220423	76220857	385	14.2245	40.8663	38.5411
chr11	76307548	76308275	44	3.8574	6.38984	4.46183
chr11	76344855	76345055	9	2.05232	2.33734	0.94166
chr11	76560545	76560716	16	3.3782	4.05221	1.61807
chr11	76576683	76577277	266	7.11517	28.6598	26.6578
chr11	76660344	76660655	501	10.3397	52.2251	50.1874
chr11	76758721	76759384	262	6.76822	28.5417	26.2581
chr11	76891690	76892089	70	4.15586	9.03911	7.00527
chr11	77110441	77110751	76	3.92133	9.19469	7.61965
chr11	77116986	77117164	22	2.13395	3.52489	2.29898
chr11	77199886	77200126	10	1.90787	2.40854	1.04321
chr11	77420998	77421168	26	2.59712	4.06335	2.6372
chr11	77437517	77437943	101	5.46821	12.2313	10.1384
chr11	77443935	77444207	166	6.92773	18.5468	16.62
chr11	77499384	77499568	327	11.0043	34.8767	32.7099
chr11	77500544	77500920	612	14.1251	63.5727	61.2742
chr11	77606439	77606878	1130	24.7906	115.248	113.084
chr11	77663825	77664142	1638	31.7801	166.698	163.83
chr11	77707082	77708910	2203	43.2702	223.44	220.32
chr11	77714526	77714773	2034	44.1516	206.497	203.471
chr11	77729023	77729521	1386	31.0073	140.898	138.676
chr11	77739398	77739566	2122	47.311	215.564	212.295
chr11	77795267	77796069	1346	27.682	137.219	134.697
chr11	77798117	77798404	872	24.2456	89.507	87.2383
chr11	77893612	77894167	248	9.79114	27.0167	24.8717
chr11	77908028	77908384	239	10.3408	26.5094	23.9214
chr11	77965697	77966737	50	3.62951	6.58639	5.02585
chr11	77993058	77993291	35	3.54509	5.48327	3.55159
chr11	77996674	77997306	113	4.93046	13.1346	11.3843
chr11	78011418	78011732	78	4.58122	9.42838	7.8099
chr11	78059025	78059683	62	4.29269	7.91686	6.23194
chr11	78141826	78142238	368	15.6684	39.4594	36.8461
chr11	78160842	78161099	405	16.9785	43.2264	40.5867
chr11	78169167	78169413	282	12.4044	30.4105	28.2912
chr11	78325426	78325771	138	7.38962	15.8349	13.8816
chr11	79043308	79043584	9	2.16865	2.44328	0.94974
chr11	79068010	79068398	30	2.99465	4.91023	3.09548
chr11	79152948	79153517	236	8.50807	25.8258	23.6595
chr11	79308401	79308755	590	16.3575	62.5971	59.019
chr11	79391277	79391559	239	8.17142	25.81	23.9026
chr11	79543123	79543490	115	5.75279	13.5554	11.5231
chr11	79605690	79606639	10	2.34997	2.7249	1.00357
chr11	79775856	79776434	9	2.62578	2.98424	0.96721
chr11	79806326	79807420	10	2.29052	2.77766	1.001
chr11	79894331	79894695	24	3.15037	4.4493	2.42773
chr11	79997253	79997534	95	4.68778	11.0475	9.55453
chr11	80176745	80177047	366	13.1474	39.1082	36.6856
chr11	80196526	80197270	358	11.7428	38.0263	35.8318
chr11	80241989	80242877	20	2.68035	3.79858	2.08297
chr11	80391344	80391602	45	3.82738	6.54844	4.59151
chr11	81725399	81725694	45	4.44122	7.16983	4.5319
chr11	82425539	82425918	12	2.11855	2.81824	1.23413
chr11	82577642	82578160	25	2.69791	4.2205	2.50126
chr11	82721850	82722018	11	2.48356	2.92719	1.1943
chr11	83111814	83111993	6	1.50656	1.90485	0.66457
chr11	83115954	83116477	127	5.39184	14.8491	12.8
chr11	83279599	83279861	569	16.3909	59.3991	56.9991
chr11	83286509	83287005	954	24.6718	98.2336	95.4201
chr11	83566964	83567702	989	25.9214	101.356	98.9171
chr11	83646138	83646306	307	9.93538	32.2424	30.7341
chr11	83755486	83755842	296	10.5393	31.922	29.6772
chr11	83777809	83778324	57	4.13134	7.48497	5.7806
chr11	83857023	83857318	23	2.73454	3.89299	2.30072
chr11	83992971	83993696	18	2.95812	3.89406	1.82033
chr11	84526956	84527574	12	3.34297	3.89752	1.21344
chr11	84683090	84683460	8	2.1353	2.40179	0.85355
chr11	84729605	84730004	23	2.82879	4.04836	2.33934
chr11	84953532	84953809	163	7.52964	18.4928	16.3758
chr11	85048061	85048742	46	3.65485	6.49339	4.67824
chr11	85492483	85492676	9	2.70554	3.05203	0.94247
chr11	85594669	85595027	2	1.16946	1.04615	0.24611
chr11	85655494	85655689	11	2.4128	2.83578	1.17401
chr11	85671501	85671833	32	3.58161	5.17791	3.26761
chr11	85674172	85674430	106	7.07584	13.0036	10.6074
chr11	86070837	86071232	108	6.54909	12.7253	10.8094
chr11	86171457	86172037	22	2.85616	3.92713	2.23651
chr11	86358089	86358495	76	4.53793	9.36141	7.6285
chr11	86570797	86571930	25	2.90921	4.25417	2.51217
chr11	86887139	86887641	40	3.5328	5.91379	4.07307
chr11	86900094	86900467	183	9.26047	20.4917	18.3125
chr11	86922124	86923187	879	28.4174	90.1452	87.9948
chr11	86940789	86941033	1303	37.7429	132.409	130.381
chr11	87284423	87284591	1731	46.2166	175.51	173.115
chr11	87641083	87642242	2780	72.6262	281.602	278.051
chr11	87666608	87666891	2445	62.5904	247.676	244.529
chr11	87861035	87861547	2180	58.1276	220.941	218.012
chr11	87881301	87882325	2085	58.3751	211.786	208.503
chr11	88017772	88018016	1231	37.8836	125.867	123.15
chr11	88366383	88366729	551	20.4429	57.3755	55.1996
chr11	88396035	88396979	485	19.8192	51.2217	48.5605
chr11	88578969	88579200	120	6.77843	13.8302	12.0513
chr11	88725999	88726335	22	3.38363	4.47781	2.25393
chr11	88816597	88816883	14	2.46097	3.05097	1.49592
chr11	88835117	88835871	107	6.21146	12.7976	10.7293
chr11	90230292	90230574	67	4.87417	8.85984	6.70891
chr11	90244042	90244221	81	5.70023	10.3412	8.13051
chr11	90409881	90410049	13	2.67209	3.2813	1.31231
chr11	90499270	90500178	10	2.09176	2.57381	1.01372
chr11	93333164	93334178	11	2.36103	2.88053	1.16496
chr11	93502622	93502790	16	2.16096	2.95974	1.62372
chr11	93829449	93830005	18	2.29565	3.31913	1.80219
chr11	93905504	93905729	52	4.57907	7.8339	5.2324
chr11	93934463	93934816	12	2.39314	3.04464	1.26001
chr11	94021891	94022153	26	2.87798	4.47979	2.69506
chr11	94182294	94183744	249	7.82194	26.9867	24.9564
chr11	94189102	94189748	370	9.44009	39.2923	37.0095
chr11	94430624	94430915	363	11.6629	38.6769	36.3
chr11	94514865	94515502	89	4.62211	10.8031	8.9006
chr11	94538610	94538876	14	2.56444	3.22714	1.48683
chr11	94819459	94819629	63	4.77355	8.35239	6.38644
chr11	95171338	95172204	34	3.22679	5.14478	3.40773
chr11	95246168	95246367	13	2.38237	2.95608	1.31036
chr11	95253696	95253995	37	3.49725	5.63538	3.79817
chr11	95895835	95896266	297	11.1166	32.118	29.7021
chr11	95926498	95926850	691	19.536	71.8286	69.1246
chr11	95935775	95935959	704	17.0052	73.0187	70.4302
chr11	95936936	95937602	247	7.64783	26.7502	24.7674
chr11	96143784	96144610	42	3.55206	6.1589	4.20061
chr11	96153292	96153714	40	2.8775	5.40681	4.04845
chr11	96154601	96155052	40	3.50332	5.81847	4.03312
chr11	96164384	96164688	7	2.00798	2.2455	0.75774
chr11	96179948	96181090	19	2.51679	3.85179	1.96231
chr11	96182006	96182286	36	2.70321	5.12153	3.64195
chr11	96187059	96187227	123	6.33321	14.9087	12.3296
chr11	96193978	96194210	178	7.68071	20.262	17.8794
chr11	96202077	96203665	300	9.78883	32.016	30.018
chr11	96210973	96211449	486	13.5124	50.6601	48.6402
chr11	96215711	96216223	586	16.8949	60.9854	58.6713
chr11	96667978	96668151	410	14.4192	43.8822	41.0745
chr11	96686456	96686708	198	8.06144	22.0327	19.8817
chr11	96691188	96692047	176	5.94694	19.6334	17.6013
chr11	96902777	96903040	130	4.31233	15.2956	13.0627
chr11	97140656	97141014	56	3.42583	7.57146	5.63555
chr11	97177011	97177466	44	3.51998	6.23549	4.46771
chr11	97231885	97232334	216	11.1362	24.5722	21.6002
chr11	97437995	97438191	31	2.8119	4.54978	3.13531
chr11	97541910	97542160	11	2.63758	3.09486	1.1965
chr11	97560456	97561345	15	2.32339	3.05277	1.55251
chr11	97606134	97606635	160	6.52681	17.987	16.0684
chr11	97681301	97681535	409	13.1096	42.8551	40.9052
chr11	97702498	97702700	565	17.6428	59.0361	56.5891
chr11	97745718	97746060	404	13.1626	42.7672	40.4083
chr11	97793632	97793937	229	8.14119	25.5592	22.9666
chr11	97848999	97849346	18	2.53126	3.63057	1.80199
chr11	97887843	97888238	16	2.24435	3.39322	1.66457
chr11	98054342	98054825	26	2.88478	4.39428	2.6476
chr11	98135090	98135258	63	3.53296	8.03973	6.31682
chr11	98194784	98195104	141	5.92183	15.9887	14.1882
chr11	98222181	98222417	255	8.7346	27.6795	25.514
chr11	98590420	98590975	133	6.51878	15.2764	13.3235
chr11	98655408	98656203	97	5.59485	11.5462	9.73663
chr11	98670719	98671598	55	4.07672	7.43966	5.56313
chr11	98724609	98725146	33	3.14643	5.116	3.3414
chr11	98812791	98813351	28	2.8082	4.65341	2.88198
chr11	98825502	98825710	8	1.69009	2.04953	0.85648
chr11	98884626	98885993	89	4.71217	10.7203	8.92398
chr11	98908433	98908674	289	9.84004	30.8817	28.926
chr11	99043920	99044371	345	11.2613	36.6381	34.5673
chr11	99092176	99092432	226	7.21504	24.5629	22.6295
chr11	100082096	100082394	10	1.24879	1.68499	1.08698
chr11	100180809	100181819	17	2.83264	3.59003	1.73503
chr11	100302234	100302505	17	2.64008	3.44407	1.73834
chr11	100333764	100334322	75	3.96451	9.27137	7.53805
chr11	100431882	100432132	18	2.67356	4.08957	1.82304
chr11	100480604	100481149	41	3.58789	5.99092	4.1437
chr11	100573503	100573896	109	6.36445	12.7815	10.9846
chr11	100606981	100607558	148	9.17727	17.7288	14.8001
chr11	100711550	100711784	25	2.87964	4.02992	2.50007
chr11	100870409	100870917	97	4.92885	11.5327	9.77216
chr11	100884941	100885109	459	17.256	48.1729	45.9955
chr11	100976966	100977134	716	25.7316	73.8165	71.6573
chr11	101106886	101107103	1122	38.1039	114.951	112.285
chr11	101139874	101140491	675	24.7312	69.9507	67.5768
chr11	101278563	101278809	31	3.83683	5.30039	3.14501
chr11	101285831	101286707	66	4.39936	8.54415	6.61434
chr11	101303454	101303871	26	3.07546	4.68568	2.63965
chr11	101413972	101414641	36	3.49113	5.36864	3.62363
chr11	101503315	101503579	175	10.0362	20.4055	17.5541
chr11	101506706	101506960	49	3.55408	6.50879	4.91203
chr11	101519842	101520081	15	1.85957	2.66612	1.56941
chr11	101548688	101549188	12	2.40699	2.87873	1.25237
chr11	101633834	101634088	7	2.35706	2.58934	0.79699
chr11	102017168	102017876	35	3.13112	5.34786	3.58933
chr11	102046342	102046729	22	3.00094	4.01098	2.24715
chr11	102079826	102080418	9	2.70914	3.02888	0.92008
chr11	102086765	102086941	10	2.14943	2.45214	1.01934
chr11	102090755	102091594	20	3.03171	3.91867	2.00031
chr11	102131867	102132036	3	1.22281	1.23421	0.37773
chr11	102180728	102180897	7	1.85236	2.00932	0.70731
chr11	102181983	102182178	8	2.24911	2.52826	0.89235
chr11	102196521	102196689	5	1.93156	2.03527	0.5912
chr11	102199906	102200210	16	2.72073	3.54105	1.68989
chr11	102269849	102270102	119	7.92063	14.6833	11.9336
chr11	102291519	102291687	57	4.06267	7.31145	5.71162
chr11	102417116	102417658	29	3.02757	4.80942	2.92519
chr11	102434596	102434871	13	2.19482	3.02331	1.34479
chr11	102466232	102466405	29	3.21231	5.31886	2.93198
chr11	102558804	102559205	20	2.61753	3.70209	2.01415
chr11	102680851	102681092	43	3.50046	6.19425	4.31019
chr11	102889594	102890216	93	5.38303	11.5114	9.34293
chr11	102976011	102976734	94	5.84119	11.4648	9.46794
chr11	102993646	102994455	33	3.17711	5.2535	3.39292
chr11	102995140	102995410	9	2.20966	2.65542	0.97844
chr11	103020306	103020687	33	3.43759	5.13468	3.38391
chr11	103107512	103107822	13	2.03167	2.51488	1.31012
chr11	103128324	103129025	7	2.28766	2.53268	0.7814
chr11	103188302	103188491	10	2.48085	2.87072	1.06358
chr11	103777809	103777977	10	1.93538	2.30176	1.09225
chr11	103815063	103815662	40	3.36785	5.79824	4.06579
chr11	103827816	103828251	57	4.36509	7.63954	5.7732
chr11	103934144	103934386	429	16.1394	45.2546	42.9024
chr11	104127042	104127210	507	17.7935	52.9946	50.7828
chr11	104137266	104137438	711	23.5926	73.9542	71.1513
chr11	104302735	104304384	817	20.6788	83.9904	81.7265
chr11	104382058	104382887	954	27.2375	97.6946	95.4983
chr11	104389471	104389904	732	23.3568	75.5865	73.2786
chr11	104395965	104396283	346	13.1911	36.6286	34.6656
chr11	104411618	104412143	118	6.44275	13.7093	11.8865
chr11	104987670	104988099	81	3.83734	9.89065	8.10854
chr11	105224374	105224542	299	8.68108	31.9556	29.9284
chr11	105592943	105593119	490	13.6358	51.8488	49.0834
chr11	106077440	106078011	681	16.3831	70.4839	68.1291
chr11	106116915	106117820	335	9.15776	35.8732	33.5995
chr11	106133061	106133392	85	4.17134	10.1128	8.59235
chr11	106181300	106181468	82	4.34226	9.97803	8.23002
chr11	106348842	106349245	60	3.69596	7.70573	6.00337
chr11	106473468	106473794	41	3.93251	6.13091	4.14527
chr11	106539471	106539675	52	4.16408	7.15276	5.29187
chr11	106648600	106650318	538	17.5284	56.0588	53.8541
chr11	106651107	106651315	1741	50.1025	177.283	174.104
chr11	106860234	106861108	1008	29.9217	102.944	100.809
chr11	106992213	106993612	1066	33.366	109.388	106.607
chr11	107050320	107050759	122	6.75541	14.3133	12.2457
chr11	107220109	107220297	73	5.15948	9.49322	7.34439
chr11	107274546	107274714	111	6.68303	13.1615	11.1782
chr11	107340770	107341404	199	10.1307	22.3163	19.958
chr11	107409159	107409700	54	4.59702	7.46031	5.44619
chr11	107826798	107826983	30	3.43495	4.8238	3.02325
chr11	108042541	108043112	39	3.95228	5.94934	3.98279
chr11	108240209	108240468	7	1.91452	2.12568	0.76892
chr11	108286263	108286686	13	2.25946	2.92851	1.31009
chr11	108779099	108779267	33	3.98451	5.634	3.33354
chr11	108819208	108819833	7	1.84279	2.15171	0.7869
chr11	108872917	108873460	141	7.48253	16.1313	14.1324
chr11	108893696	108894625	419	15.863	44.1643	41.935
chr11	109224147	109224586	81	3.65155	10.0849	8.18209
chr11	109509949	109510196	262	6.88865	28.7166	26.2117
chr11	109512254	109512788	94	4.23802	11.3991	9.41699
chr11	109578416	109578584	119	6.73593	14.7059	11.9551
chr11	109615104	109616059	193	7.03693	21.334	19.3991
chr11	109692766	109692989	407	12.6551	42.9007	40.7781
chr11	110236852	110237023	508	14.8425	53.0138	50.8098
chr11	110858670	110858985	810	27.8154	83.824	81.0113
chr11	110926619	110927930	561	19.79	58.7961	56.1264
chr11	111135128	111135343	390	15.7193	41.3572	39.0111
chr11	112363164	112363396	36	2.22968	4.27117	3.64897
chr11	112672523	112672959	69	4.28786	8.62669	6.9601
chr11	112687966	112688167	27	3.34095	4.67445	2.79995
chr11	113062513	113063309	12	2.42358	2.93378	1.29628
chr11	113155944	113156260	13	2.40008	3.09931	1.30529
chr11	113473040	113473884	47	3.5206	6.52712	4.7322
chr11	113497987	113498286	285	11.8009	31.6363	28.584
chr11	113509971	113511061	502	14.8283	52.4671	50.2842
chr11	113727077	113727268	827	22.0955	85.3931	82.7329
chr11	113833180	113833348	697	19.5747	72.2068	69.7979
chr11	113842471	113843227	541	15.665	56.2223	54.1447
chr11	113901787	113901988	547	16.1301	57.1916	54.7795
chr11	114529674	114529876	346	13.1083	37.6357	34.6859
chr11	114654459	114654627	120	6.19007	14.1298	12.0964
chr11	114797682	114798359	30	3.15657	4.97071	3.05606
chr11	115138081	115138313	39	2.93356	5.53051	3.94148
chr11	115235648	115235816	17	2.1109	3.24192	1.72116
chr11	115243147	115243753	24	2.80589	4.573	2.48674
chr11	115244953	115245314	8	1.90715	2.26586	0.88973
chr11	115264940	115265288	31	3.26478	5.00989	3.18987
chr11	115281200	115281774	334	12.0744	35.9425	33.4725
chr11	115295563	115295859	585	17.5555	61.3257	58.5875
chr11	115352856	115353288	492	14.4408	51.3749	49.2048
chr11	115397253	115398099	186	8.20556	20.7219	18.6352
chr11	115464985	115465857	109	6.35871	12.8048	10.9083
chr11	115476551	115476729	130	7.82093	15.228	13.0422
chr11	115626454	115627132	54	3.97167	7.23709	5.48047
chr11	115746179	115746347	182	8.22457	20.1204	18.2414
chr11	115794769	115795173	66	4.32054	8.38845	6.63879
chr11	115913369	115913660	8	1.96147	2.18248	0.86289
chr11	115948125	115948326	23	3.36494	4.40556	2.38259
chr11	115992151	115992470	61	4.41785	7.94637	6.14189
chr11	115999732	116000203	423	13.9012	44.4083	42.3531
chr11	116028702	116029695	912	25.6361	93.5051	91.2687
chr11	116048763	116049009	1059	29.3679	108.276	105.938
chr11	116079999	116080314	1157	29.0628	118.463	115.757
chr11	116135157	116135648	439	11.2817	46.3865	43.9821
chr11	116167855	116168465	131	5.00921	14.9211	13.1097
chr11	116193184	116193555	796	20.2147	82.1606	79.6833
chr11	116295909	116296232	1096	25.3803	111.9	109.622
chr11	116337357	116337525	693	15.7665	70.7065	69.3223
chr11	116351063	116352224	867	21.0312	89.1417	86.7856
chr11	116469249	116469547	226	10.3434	24.8278	22.6465
chr11	116522668	116523356	219	10.6184	24.1942	21.9093
chr11	116532857	116533280	40	3.34538	5.65444	4.07388
chr11	116704436	116705057	173	6.70268	19.5303	17.3545
chr11	116713461	116714723	93	4.56464	11.2322	9.38489
chr11	117199735	117199991	401	11.5544	42.8007	40.1158
chr11	117206852	117207052	286	9.01625	30.6616	28.6182
chr11	117333123	117333341	172	6.32514	19.3133	17.2521
chr11	117340021	117340916	66	3.39783	8.31549	6.61718
chr11	117413330	117413498	23	3.16062	4.41914	2.3493
chr11	117489771	117490280	113	6.17241	13.5218	11.3423
chr11	117516013	117516283	350	12.3506	37.5626	35.0862
chr11	117517341	117517631	563	16.6235	58.7709	56.3093
chr11	117641064	117641339	1245	37.4669	128.17	124.544
chr11	117704344	117704634	1062	28.6747	109.402	106.277
chr11	117710047	117710520	712	15.4833	73.4247	71.287
chr11	117734523	117734702	994	20.7776	102.082	99.4629
chr11	117848082	117848267	1036	21.6737	106.179	103.667
chr11	118188715	118189336	813	20.4636	83.5075	81.3224
chr11	118297713	118298063	575	15.7014	59.5809	57.5527
chr11	118338303	118338471	769	25.2086	80.0244	76.957
chr11	118366212	118366380	526	18.099	55.1174	52.6706
chr11	118801873	118802171	250	10.2959	27.099	25.0962
chr11	118818525	118818698	183	8.57513	20.421	18.3245
chr11	118902019	118902187	65	3.98586	8.67688	6.53179
chr11	118917715	118918386	29	3.06589	4.81189	2.99151
chr11	118946596	118946885	15	2.58944	3.46463	1.53531
chr11	118996277	118996517	75	4.82012	9.33343	7.56779
chr11	119084548	119085015	201	9.23686	22.5707	20.176
chr11	119090178	119090960	153	6.38056	17.4418	15.3055
chr11	119160948	119161784	42	3.15199	6.14053	4.29603
chr11	119216717	119216923	12	2.66777	3.2678	1.28867
chr11	119251655	119251943	16	2.47652	3.47822	1.67397
chr11	119352611	119352873	78	5.34243	10.4561	7.86449
chr11	119383580	119384400	28	2.90189	4.68473	2.89904
chr11	119464072	119464556	103	5.55424	12.4957	10.3859
chr11	119774942	119775419	9	2.14928	2.5093	0.97128
chr11	119901007	119901287	60	3.97078	7.96173	6.01144
chr11	119959920	119960601	389	14.0679	41.1066	38.9569
chr11	120104532	120105299	190	10.2363	21.4642	19.0658
chr11	120118389	120118625	110	6.88979	13.2018	11.0836
chr11	120177355	120177622	34	3.33317	5.13567	3.47615
chr11	120210160	120210465	13	2.11411	2.75335	1.36685
chr11	120239942	120240169	113	6.78728	13.857	11.3208
chr11	120319316	120320113	187	7.58277	20.3239	18.7436
chr11	120410491	120410661	427	14.7047	45.0305	42.783
chr11	120442803	120443263	937	27.2644	96.3578	93.7044
chr11	120459497	120459836	582	18.4401	60.6816	58.2832
chr11	120486157	120486339	342	11.4863	36.1815	34.2869
chr11	120534166	120534537	104	4.75724	12.1925	10.4657
chr11	120574972	120575155	9	2.13343	2.58125	0.94436
chr11	120685347	120686047	36	3.05692	5.20517	3.67886
chr11	120695260	120695605	166	7.28825	18.4609	16.6845
chr11	120766848	120767023	566	19.549	59.5994	56.698
chr11	120793784	120794011	337	11.5159	35.4748	33.7265
chr11	120852251	120852852	629	18.6776	65.6279	62.9051
chr11	120944562	120944735	640	15.9036	66.9185	64.0752
chr11	121097775	121098265	752	20.3459	77.8882	75.2556
chr11	121121607	121121775	572	18.2204	59.3235	57.2455
chr11	121413522	121413919	348	14.2064	37.4106	34.8758
chr11	121534134	121534518	26	2.47105	4.19068	2.60143
chr12	3109888	3110190	21	1.77758	3.88168	2.10624
chr12	3309388	3309994	38	2.92028	5.61155	3.81181
chr12	3364765	3364933	95	5.94177	11.7915	9.53304
chr12	3386242	3386414	118	6.08176	14.06	11.8327
chr12	3426628	3427239	42	3.0225	6.04412	4.2547
chr12	3808554	3808963	13	2.63347	3.42027	1.39684
chr12	3871757	3871959	17	2.32207	3.45168	1.75124
chr12	3959943	3960448	26	3.13877	4.51006	2.6911
chr12	4233695	4234439	50	4.09108	6.84915	5.06104
chr12	4311245	4311502	40	3.8276	5.97401	4.08514
chr12	4417599	4417899	50	4.24304	6.97291	5.07128
chr12	4483466	4484053	25	3.1991	4.39841	2.53664
chr12	4507301	4507470	11	3.09021	3.60273	1.17324
chr12	4555373	4555636	6	1.47655	1.68325	0.61832
chr12	4599468	4600025	170	8.19522	19.1507	17.0373
chr12	4776048	4776446	688	23.5648	71.2717	68.8731
chr12	4824162	4824788	1472	43.2214	150.083	147.248
chr12	4850009	4850197	1485	41.7096	151.024	148.589
chr12	4913753	4914803	1900	50.0513	192.819	190.084
chr12	4924029	4924668	2218	55.4873	224.865	221.808
chr12	7866393	7866696	1059	30.3725	108.595	105.957
chr12	8084401	8084765	740	23.6826	76.7656	74.0649
chr12	8505745	8507137	162	7.79871	18.2305	16.2807
chr12	8647541	8647933	21	2.56663	3.71268	2.19621
chr12	8680725	8681057	33	3.58598	5.33307	3.30361
chr12	8928479	8928938	117	6.53299	14.3605	11.7483
chr12	9235366	9235720	24	2.90032	4.07427	2.4978
chr12	10397588	10398241	51	4.69026	7.19715	5.11974
chr12	11273498	11273666	74	5.52644	9.35372	7.41324
chr12	11343736	11344088	205	9.86908	22.301	20.589
chr12	12330438	12330652	274	12.6186	29.9437	27.4887
chr12	12878141	12879204	26	2.82661	4.08097	2.6493
chr12	12886075	12886243	9	2.15078	2.44382	0.93226
chr12	12911544	12911831	49	3.92928	6.42055	4.93461
chr12	12934733	12935032	82	5.97957	10.2542	8.21036
chr12	12949166	12949379	27	3.05057	4.35754	2.76306
chr12	13255762	13256078	73	5.08407	9.35916	7.33695
chr12	13275728	13276194	58	4.47289	7.70833	5.87474
chr12	13506089	13506493	85	5.65054	10.2542	8.59579
chr12	14159355	14159589	37	3.92799	5.70338	3.73193
chr12	15738187	15738355	47	3.36251	6.59574	4.79431
chr12	16162649	16163384	320	13.1884	34.3562	32.0096
chr12	16521743	16521966	275	12.0375	29.6516	27.5189
chr12	16539225	16540218	211	10.584	23.5822	21.1608
chr12	16575918	16576454	18	2.53082	3.3388	1.83259
chr12	16817635	16818107	104	6.33288	12.1909	10.429
chr12	16825528	16825696	124	7.53967	14.4382	12.453
chr12	16827850	16828026	103	7.10623	12.5935	10.3155
chr12	16860802	16861163	63	5.2418	8.42481	6.32288
chr12	17246130	17246444	7	2.08647	2.29864	0.77556
chr12	17564083	17564331	16	2.96045	3.82908	1.68991
chr12	17583127	17583667	30	3.7365	5.53373	3.08595
chr12	21379392	21379776	38	3.4081	5.74289	3.83007
chr12	21469351	21469568	7	2.16671	2.45956	0.77932
chr12	25279077	25279245	100	5.74524	11.652	10.0819
chr12	25394960	25395228	98	5.88491	11.7581	9.87487
chr12	25439499	25439905	37	3.02919	4.95547	3.77307
chr12	25516080	25516278	40	4.13996	6.12977	4.0978
chr12	25517212	25517485	12	2.25335	2.75493	1.20248
chr12	25618769	25619043	48	4.20947	7.05301	4.85197
chr12	25659644	25660056	29	2.88123	4.77607	2.99901
chr12	25719506	25719748	42	2.92788	5.63199	4.20008
chr12	26753140	26753324	8	2.48975	2.78771	0.8787
chr12	26797638	26797813	3	1.37525	1.32236	0.36744
chr12	27150383	27150554	14	2.48263	3.31837	1.45981
chr12	27561430	27561624	56	4.30122	7.30239	5.61259
chr12	27746866	27747923	18	2.94551	3.75097	1.82555
chr12	27749938	27750106	10	2.75851	3.1501	1.04212
chr12	27767033	27767348	12	2.61555	3.10562	1.24733
chr12	27824340	27824533	9	2.26359	2.54243	0.93558
chr12	27997126	27997827	36	4.74795	6.45227	3.61492
chr12	28026310	28027043	36	3.63468	5.46827	3.68946
chr12	29145863	29146112	65	4.82802	8.30342	6.58693
chr12	29320411	29321060	9	2.36763	2.65708	0.93284
chr12	29436477	29436673	9	2.71063	3.04048	0.93491
chr12	29559808	29560095	40	4.07965	6.21035	4.04522
chr12	29975933	29976215	13	3.12575	3.67986	1.32461
chr12	30053098	30053555	14	2.52855	3.07261	1.47896
chr12	30382485	30383230	46	3.91468	6.4692	4.63686
chr12	30384012	30384185	119	7.02549	14.1456	11.9302
chr12	30557395	30557563	44	3.70671	6.90494	4.43223
chr12	30567883	30568056	13	2.01873	2.88948	1.33074
chr12	30755991	30756237	20	2.58148	3.48369	2.04892
chr12	30845549	30846026	13	2.63917	3.14195	1.34001
chr12	31596219	31596463	8	1.79297	2.0156	0.85897
chr12	31898480	31898744	11	2.29905	2.70065	1.19598
chr12	32339619	32339800	99	5.88048	12.3583	9.95284
chr12	32634862	32635257	101	5.56052	11.9898	10.1881
chr12	33063326	33063923	161	7.0751	18.1406	16.1225
chr12	33150214	33150401	153	5.35055	16.4279	15.3193
chr12	33562827	33563180	327	11.2962	34.8763	32.7993
chr12	33638557	33639520	151	5.48004	16.9074	15.1942
chr12	33693115	33693424	56	3.53712	7.60424	5.66434
chr12	33720132	33720582	12	2.36685	2.97816	1.23073
chr12	33832529	33832960	14	2.52369	3.12433	1.43201
chr12	33840282	33840537	5	1.89194	1.97748	0.56254
chr12	33847374	33847785	11	2.41651	2.87959	1.1603
chr12	33905229	33905564	17	2.71526	3.37779	1.72205
chr12	33999140	33999626	18	2.34993	3.10307	1.81097
chr12	34045667	34045835	14	1.933	2.47208	1.44004
chr12	34114406	34114583	40	3.42989	5.4635	4.01609
chr12	35213730	35214086	123	8.03993	15.0689	12.3427
chr12	35693150	35693341	111	7.62019	13.8845	11.1357
chr12	35731485	35732323	22	3.02539	4.08237	2.21314
chr12	36862581	36862890	40	2.90163	5.82125	4.08642
chr12	36884671	36884875	80	4.98959	9.78042	8.00303
chr12	38607122	38607694	161	8.14085	18.4039	16.1931
chr12	39505557	39506008	47	3.82237	6.5285	4.70969
chr12	39506803	39507248	33	3.56644	5.328	3.32806
chr12	39515215	39515473	81	4.83008	10.0295	8.12657
chr12	39655603	39655823	105	4.80211	12.2941	10.5549
chr12	39660591	39660940	83	3.56643	9.64257	8.31746
chr12	40392178	40392374	124	6.057	14.4542	12.4007
chr12	40683049	40683232	77	4.51778	9.26454	7.73301
chr12	40684599	40684823	89	6.0694	11.0633	8.91858
chr12	40763245	40763426	49	4.40052	6.94992	4.93946
chr12	41172215	41172575	14	2.64259	3.18972	1.41681
chr12	41558869	41559121	17	3.05059	3.80362	1.75844
chr12	41625048	41625301	9	2.27658	2.58988	0.94029
chr12	45431024	45431434	175	9.57651	19.7034	17.5161
chr12	46177338	46177506	189	9.94033	21.0943	18.9998
chr12	46544827	46545240	82	5.85912	10.2584	8.25598
chr12	47472815	47473016	12	2.98053	3.44786	1.20456
chr12	47919144	47920078	14	2.42949	3.14728	1.40928
chr12	48265512	48266328	11	2.956	3.44095	1.17552
chr12	49323435	49323674	7	1.89886	2.04865	0.71526
chr12	51645936	51646149	4	1.54522	1.53738	0.43583
chr12	51749970	51750171	2	1.07561	0.96184	0.27147
chr12	52219128	52219375	44	4.81049	7.09868	4.46749
chr12	52478336	52478854	65	4.28944	8.34967	6.5831
chr12	52791820	52793084	19	2.67863	3.61237	1.93184
chr12	53072288	53072590	8	1.91056	2.15604	0.86343
chr12	53107269	53107695	164	6.44055	18.4928	16.467
chr12	53198562	53198919	337	9.32318	35.8074	33.7976
chr12	53447377	53447845	799	20.9785	83.0067	79.9527
chr12	53604936	53605221	468	12.4494	49.0571	46.8913
chr12	53935956	53936611	300	8.88406	32.4105	30.0984
chr12	54127133	54127543	198	6.44499	21.5952	19.8216
chr12	54133773	54134869	150	5.71807	16.9857	15.0678
chr12	54225471	54225917	21	2.06327	3.26143	2.1598
chr12	54347422	54347683	18	2.73945	3.62689	1.83775
chr12	54352560	54352858	14	2.64649	3.37604	1.48388
chr12	54393382	54393750	9	2.53365	2.86112	0.9498
chr12	54549181	54549457	7	2.23017	2.45084	0.7803
chr12	54688738	54689010	11	2.64349	3.04426	1.11261
chr12	54706678	54706962	20	2.87407	3.75288	2.04496
chr12	54944711	54944910	12	2.56965	3.03388	1.25288
chr12	55019703	55020090	9	2.42034	2.73623	0.9657
chr12	55082514	55083388	7	2.03983	2.23467	0.76611
chr12	55154085	55154301	7	1.90263	2.07502	0.76431
chr12	55334179	55334414	10	2.25101	2.64031	1.09355
chr12	55757423	55757613	14	2.77743	3.39005	1.48808
chr12	55796387	55796967	14	2.80317	3.37688	1.44202
chr12	55811719	55812162	44	3.80133	6.2075	4.4324
chr12	55838795	55839213	14	2.22723	2.87024	1.46385
chr12	55896540	55896797	11	2.33961	2.80304	1.18724
chr12	55963257	55963850	15	2.60991	3.24235	1.58217
chr12	56087327	56087775	21	3.00715	3.94226	2.10013
chr12	56403064	56404196	12	2.39892	2.87344	1.21355
chr12	56416413	56416585	9	2.29036	2.62628	0.99857
chr12	56499274	56500020	9	2.57089	2.90682	0.95682
chr12	56547567	56548098	49	4.17003	7.03928	4.91905
chr12	56593380	56593573	141	7.35405	16.524	14.186
chr12	56921343	56922188	183	8.39023	20.3873	18.3919
chr12	57446659	57446953	27	3.01695	4.55975	2.70938
chr12	58331247	58331415	15	2.88699	3.48523	1.53581
chr12	60114191	60114500	6	1.80562	1.94534	0.67252
chr12	60162026	60162314	23	2.9672	3.98175	2.37956
chr12	60167299	60168209	15	2.55662	3.15393	1.51464
chr12	60231921	60232124	11	2.43471	2.90005	1.11875
chr12	60321021	60321253	22	3.23855	4.5289	2.23823
chr12	66066552	66067085	83	5.70169	10.2962	8.30935
chr12	66174398	66175220	80	5.1705	9.9058	8.08213
chr12	66176539	66176925	136	7.35914	15.6214	13.6696
chr12	66799329	66799540	41	3.54563	5.81506	4.19025
chr12	68160180	68160871	32	3.44012	5.0928	3.21939
chr12	68321566	68321755	48	4.58883	7.11604	4.89214
chr12	68323309	68323890	32	3.91427	5.5403	3.28434
chr12	69950708	69950993	58	5.32686	8.28839	5.86003
chr12	70259702	70260576	24	3.08084	4.15349	2.45413
chr12	70284488	70284966	111	5.78418	13.2129	11.1561
chr12	70286284	70286452	104	4.58891	11.7688	10.4505
chr12	70317354	70317540	243	10.4125	26.8498	24.3536
chr12	70328956	70329273	121	6.32208	14.0978	12.1791
chr12	70342761	70342929	44	3.28789	6.08368	4.49093
chr12	70397518	70398139	16	2.52512	3.37289	1.64144
chr12	70462039	70462212	28	2.84306	4.08725	2.81887
chr12	70683830	70684156	254	11.8241	27.3799	25.4625
chr12	70993711	70994113	188	9.74218	20.865	18.8979
chr12	71087560	71088176	84	6.30263	10.7185	8.49408
chr12	71448707	71448966	9	2.47659	2.87594	0.99796
chr12	71492013	71492423	17	2.52292	3.24184	1.75847
chr12	71553991	71554271	7	1.89072	2.04699	0.70204
chr12	72069642	72069834	36	3.91541	5.8291	3.65525
chr12	72070782	72071558	8	2.04116	2.33448	0.87949
chr12	72116164	72117493	567	21.4855	59.1356	56.791
chr12	72149046	72149445	638	24.1846	66.2109	63.8481
chr12	72465574	72465824	315	14.2673	33.7391	31.5824
chr12	72525754	72526056	301	14.8126	32.8482	30.1454
chr12	73374968	73375480	7	2.0201	2.2718	0.77798
chr12	73509496	73510027	20	3.55192	4.49938	2.02376
chr12	73534438	73535180	69	5.09897	8.81675	6.91611
chr12	73832692	73832897	37	3.82957	5.67237	3.74068
chr12	74147496	74148017	61	4.40534	8.89136	6.17882
chr12	74213195	74213389	71	4.48248	9.11161	7.12773
chr12	74472234	74472423	7	1.99967	2.15929	0.70568
chr12	74509881	74510741	15	2.60519	3.24335	1.52984
chr12	74869588	74869956	12	2.4209	3.12093	1.27303
chr12	74911466	74911675	29	3.01623	4.66322	2.97445
chr12	75009335	75009567	6	1.87937	2.01051	0.66156
chr12	75065467	75065813	20	2.58032	3.50695	2.07421
chr12	75905106	75905435	30	3.28636	4.71753	3.07685
chr12	76277797	76278106	7	1.47833	1.83884	0.75862
chr12	76381654	76381822	3	1.24064	1.22854	0.3772
chr12	76409138	76409897	50	4.50266	7.2288	5.08642
chr12	76410924	76411137	16	2.96143	3.68357	1.67186
chr12	76697202	76697868	9	2.42889	2.73642	0.96242
chr12	77117614	77117867	38	3.75943	5.85872	3.84579
chr12	77470303	77470471	9	2.5161	2.86108	0.91654
chr12	78121238	78121464	27	3.49261	5.19605	2.72265
chr12	78362427	78362734	21	2.71444	3.63525	2.11217
chr12	79050572	79050872	14	2.54439	3.20809	1.48442
chr12	79327606	79327968	62	4.79644	8.14465	6.28904
chr12	79962043	79962837	22	3.17273	4.10512	2.22418
chr12	80190566	80190787	26	3.42647	4.5966	2.65788
chr12	80396980	80397473	7	2.07973	2.31235	0.7909
chr12	80611971	80613062	28	2.99185	4.48897	2.85985
chr12	80713903	80714334	31	4.0033	5.49348	3.191
chr12	80781302	80781694	15	3.02411	3.68198	1.54752
chr12	80939070	80939888	12	3.01886	3.4931	1.21298
chr12	81027293	81027461	11	2.26262	2.62449	1.13088
chr12	81070199	81071769	12	2.68128	3.21773	1.21557
chr12	81163166	81164283	59	5.02648	8.20773	5.98286
chr12	81214598	81214788	32	3.06404	4.86837	3.22509
chr12	81233290	81233896	32	3.55039	5.15592	3.29794
chr12	81296744	81296912	6	2.11443	2.2661	0.66715
chr12	81537228	81537892	33	3.61418	5.15193	3.37655
chr12	81563880	81564322	167	7.09779	18.6752	16.7205
chr12	81623004	81623176	623	19.5589	64.7983	62.3588
chr12	81668489	81668896	641	14.8782	66.6457	64.1321
chr12	81688787	81689086	466	10.0718	48.734	46.6895
chr12	81744693	81745454	285	9.33027	30.6258	28.5142
chr12	81788712	81789270	633	21.8699	65.9404	63.3819
chr12	81811155	81811541	863	32.0403	90.2711	86.3702
[truncated: 7,090 more rows]
