# Supplementary material for: YY1 and CTCF orchestrate a 3D chromatin looping switch during early neural lineage commitment
Source: HighWire-hosted journal article supplement (doi:10.1101/gr.215160.116), 2017-05-23
Supplement: Supplemental_Table_S13.xlsx [file Supplemental_Table_S13.xlsx]

## Sheet: mES_Untreated_YY1_noduplicates_
Beagan et al. 2017
Table S13, Significant YY1 Peaks in ES cells in Serum
#chr	start	end	score	signalValue	-LOG10(p-value)	-LOG10(q-value)
chr1	3661144	3662013	21	3.06739	3.9842	2.10892
chr1	4481959	4482465	32	4.56497	6.12022	3.21919
chr1	4775603	4775920	8	1.98895	2.20412	0.82958
chr1	4792077	4793391	12	2.53976	3.11176	1.25365
chr1	4841731	4842358	23	2.91459	4.25654	2.36627
chr1	6204789	6205203	6	1.6529	1.83584	0.65819
chr1	7387973	7388626	7	1.68266	1.87743	0.75546
chr1	9459742	9460433	32	3.03411	4.79217	3.28454
chr1	9535134	9536228	18	2.76695	3.70599	1.80459
chr1	9758622	9758870	12	2.0954	2.52627	1.27342
chr1	9933943	9934303	9	2.2142	2.52697	0.98285
chr1	10027685	10028286	13	2.46959	3.00086	1.35651
chr1	10222778	10223434	30	3.3887	4.84863	3.00868
chr1	10795283	10795728	17	2.31918	3.03394	1.75958
chr1	12855162	12856440	10	2.56607	2.92115	1.05297
chr1	13363335	13364625	15	2.26587	2.90167	1.56973
chr1	13579708	13580136	11	2.55893	2.98643	1.14226
chr1	13650341	13651211	15	2.29782	3.00143	1.55596
chr1	15633914	15634501	65	4.48638	8.31769	6.52995
chr1	15795284	15796153	158	7.90156	18.069	15.8841
chr1	15873585	15874048	43	3.15782	5.86989	4.37367
chr1	16094104	16094980	13	2.22427	2.91988	1.38978
chr1	16608975	16609544	42	4.07338	6.24833	4.27069
chr1	16646722	16647375	17	2.61127	3.36325	1.73728
chr1	17317599	17317840	8	2.10107	2.36606	0.89852
chr1	18783716	18783971	9	2.10369	2.35817	0.91174
chr1	19226567	19226840	11	2.56787	3.02311	1.15605
chr1	19230347	19231416	12	2.96366	3.55443	1.29777
chr1	20810096	20810498	14	2.31979	2.9289	1.4198
chr1	22617102	22617427	5	1.43851	1.46304	0.53277
chr1	23314095	23314365	14	2.68009	3.23001	1.42866
chr1	23379787	23380145	9	2.29206	2.56067	0.91004
chr1	23712466	23712749	10	2.19594	2.5897	1.08333
chr1	23769057	23769900	12	2.39286	2.86205	1.2789
chr1	24012261	24012641	12	2.37253	2.82717	1.25733
chr1	24685488	24685802	9	1.76721	2.18301	0.97521
chr1	30929755	30931077	36	2.961	5.45808	3.69074
chr1	31006075	31007139	265	10.1394	29.0959	26.5216
chr1	32131239	32131519	304	12.0912	32.7881	30.4116
chr1	32229649	32229916	406	16.1915	43.8664	40.6801
chr1	33079651	33079970	140	6.73908	16.0411	14.0565
chr1	33678737	33678998	40	3.23784	5.44821	4.00035
chr1	33776718	33777218	14	2.38741	3.02961	1.41667
chr1	33814237	33814478	8	2.13919	2.44341	0.87876
chr1	33870821	33871582	27	2.82329	4.23681	2.76007
chr1	33964431	33964930	114	6.8666	13.9362	11.469
chr1	34170664	34170960	95	5.37511	11.3459	9.5746
chr1	34495973	34497030	18	2.4869	3.35251	1.85429
chr1	34593307	34594172	12	2.50747	3.10749	1.25186
chr1	34858888	34859246	53	4.33361	7.15715	5.32626
chr1	34899585	34899942	106	6.72929	12.9113	10.6688
chr1	34916828	34917391	41	3.41958	5.99263	4.14559
chr1	34987147	34987518	10	2.39165	2.80639	1.09924
chr1	36125508	36125891	8	2.03942	2.41493	0.89838
chr1	36300947	36301341	10	2.25108	2.64208	1.09718
chr1	36371896	36372275	9	2.1336	2.43231	0.98985
chr1	36501689	36502273	10	1.98824	2.31762	1.06092
chr1	36527817	36528665	21	3.05461	4.01255	2.14684
chr1	36558139	36558490	8	1.83659	2.12213	0.87172
chr1	36568545	36569321	31	3.19936	5.01365	3.12237
chr1	36739428	36740165	25	3.05106	4.35757	2.50024
chr1	36748346	36748767	17	2.13585	3.18403	1.71886
chr1	36827605	36828108	7	1.88073	2.12481	0.76886
chr1	36835943	36836227	16	2.90891	3.56054	1.60145
chr1	36996172	36997119	16	2.5046	3.21288	1.67996
chr1	37014169	37014486	7	2.00045	2.20541	0.79895
chr1	37039467	37044990	16	2.58723	3.34291	1.63406
chr1	37157670	37158366	21	2.40887	3.45679	2.16672
chr1	37486489	37487507	16	2.49148	3.21175	1.62206
chr1	37636471	37636834	59	4.25778	7.71781	5.96895
chr1	37921943	37922660	85	5.59537	10.7076	8.51003
chr1	38053977	38055074	13	2.18985	2.75836	1.32321
chr1	38684147	38684630	2	1.03927	0.91694	0.27235
chr1	39424753	39425303	49	3.19538	6.7024	4.98304
chr1	39633935	39634222	61	3.79511	7.77009	6.16935
chr1	39712042	39712362	13	2.10385	2.65723	1.31669
chr1	39872584	39872854	6	1.58174	1.6488	0.60847
chr1	39957400	39957730	13	2.12171	2.60319	1.35202
chr1	41188131	41188372	30	3.55434	4.99871	3.05891
chr1	42569594	42569835	40	4.27069	6.27676	4.02733
chr1	42907937	42908550	18	2.61535	3.43682	1.86621
chr1	43009962	43010272	42	3.86259	6.25952	4.28832
chr1	43155166	43155904	29	2.97941	4.66569	2.94069
chr1	43502909	43503150	12	2.61069	3.05415	1.22195
chr1	44084050	44084347	10	2.2317	2.5554	1.04319
chr1	44175705	44175996	8	2.00566	2.37583	0.84342
chr1	44625160	44625543	14	2.19172	2.87539	1.48138
chr1	45851948	45852559	48	3.84986	6.5244	4.81519
chr1	46978598	46978892	82	5.42969	10.0532	8.21543
chr1	50956919	50957401	84	5.30995	10.8814	8.49793
chr1	51515595	51516003	154	6.84895	17.6105	15.4442
chr1	52176029	52176349	396	16.4085	42.7002	39.6531
chr1	52901766	52902162	216	8.88764	23.2768	21.6368
chr1	53009804	53010422	483	19.3763	51.8387	48.3922
chr1	53244189	53244476	193	7.61746	21.4228	19.3277
chr1	53370376	53370650	221	9.67132	25.1929	22.1379
chr1	53409324	53409607	96	4.90343	11.3907	9.62666
chr1	53767925	53768379	65	4.44453	8.66557	6.53028
chr1	53841388	53841819	15	2.21224	2.83863	1.59835
chr1	54251572	54252300	7	2.03488	2.19724	0.72418
chr1	54307334	54307677	24	3.13981	4.23609	2.4377
chr1	54438435	54438729	20	3.24986	4.15699	2.06604
chr1	54495678	54496021	21	2.62889	3.55866	2.14456
chr1	54541719	54542068	12	2.63247	3.08688	1.24593
chr1	54862676	54863133	20	2.75177	3.80225	2.03896
chr1	54982779	54983230	18	3.04933	3.84469	1.85559
chr1	55083502	55084482	10	2.26455	2.58053	1.00297
chr1	55144711	55145222	78	5.68276	9.99763	7.82697
chr1	55187941	55188322	44	3.9064	6.2535	4.48649
chr1	55420061	55420302	14	2.13876	2.83817	1.44171
chr1	55539392	55539658	25	3.53132	4.88666	2.5874
chr1	56521814	56522259	34	3.60889	5.30021	3.44948
chr1	57463092	57463851	28	3.14788	4.6408	2.82131
chr1	58026790	58027031	38	3.5851	5.52864	3.89928
chr1	58052372	58052772	42	3.63364	5.82375	4.24627
chr1	58272305	58272700	11	2.13877	2.68253	1.18375
chr1	58480018	58480922	34	3.60652	5.32013	3.49344
chr1	58502131	58502455	45	4.16877	6.51967	4.59697
chr1	58561334	58561833	19	2.58412	3.39626	1.91076
chr1	58769958	58770392	66	4.8798	8.52256	6.68014
chr1	59030076	59030402	16	2.5537	3.22599	1.67654
chr1	59176504	59176921	8	1.99389	2.2537	0.83763
chr1	59505541	59506274	38	4.31426	6.36437	3.86035
chr1	59540871	59541719	43	3.94537	6.27239	4.30701
chr1	59741682	59742489	217	9.46791	23.9931	21.7644
chr1	60154634	60154875	592	21.4026	63.2156	59.2636
chr1	60237289	60237699	534	19.2296	57.024	53.4831
chr1	60466038	60466781	301	12.0276	32.6577	30.196
chr1	61555550	61555841	102	4.93266	11.9431	10.2852
chr1	62341865	62342106	92	5.28887	11.4014	9.2289
chr1	62829770	62830829	17	2.55708	3.36498	1.77256
chr1	63031000	63031258	10	1.71221	2.29588	1.07522
chr1	63160788	63161368	10	2.13112	2.49994	1.03153
chr1	63178266	63178707	17	2.7447	3.51121	1.74799
chr1	63185040	63186088	49	4.21202	6.83411	4.90256
chr1	63222818	63223565	40	3.38811	5.65036	4.05014
chr1	63246664	63247787	19	2.78259	3.68309	1.99531
chr1	63259931	63260725	12	2.29538	2.8818	1.20281
chr1	63488218	63488541	54	5.09885	8.0582	5.4371
chr1	63531650	63531909	64	4.54323	8.18099	6.42041
chr1	63713586	63713951	74	4.85637	9.41988	7.48011
chr1	63776860	63777498	39	3.68952	5.76293	3.97137
chr1	64168482	64169395	27	3.25473	4.5675	2.74577
chr1	64272254	64273276	78	5.09137	9.59049	7.80539
chr1	64347810	64348102	50	4.34263	7.01652	5.02739
chr1	64352098	64352558	11	2.36954	2.83147	1.1563
chr1	64579466	64579865	44	3.66705	6.02577	4.40938
chr1	64736999	64737271	161	8.75563	18.9375	16.1719
chr1	64779678	64780755	189	9.33034	21.341	18.998
chr1	65059427	65059676	147	7.91251	16.9861	14.7553
chr1	65233056	65233551	58	4.15346	7.40815	5.87205
chr1	66747238	66747751	24	3.14034	4.28147	2.42562
chr1	69423360	69424731	10	2.40745	2.74736	1.03343
chr1	69873487	69873941	14	2.43985	3.05553	1.47511
chr1	71858661	71859075	23	2.61735	4.0437	2.3866
chr1	72213650	72213891	35	3.58567	5.32556	3.53138
chr1	72258560	72259054	29	3.35736	4.74416	2.90763
chr1	72283154	72284110	11	2.14361	2.68432	1.16334
chr1	72289572	72291267	21	2.86083	3.89473	2.18107
chr1	72353181	72354349	9	1.93652	2.22512	0.94409
chr1	72359499	72360320	99	6.64226	12.2572	9.92973
chr1	72629543	72630110	136	7.34277	15.5838	13.6335
chr1	72671091	72671373	102	6.40276	12.2785	10.2112
chr1	72687439	72687933	57	4.96163	8.00076	5.77645
chr1	72852334	72853998	5	1.59625	1.7956	0.58334
chr1	74156899	74157940	23	3.306	4.75535	2.32505
chr1	74282966	74283575	18	2.41046	3.41345	1.8201
chr1	74330955	74331867	26	2.74048	4.48707	2.69099
chr1	74433496	74433795	13	2.65099	3.18184	1.36829
chr1	74438024	74438646	10	2.20571	2.54707	1.06811
chr1	74442049	74443677	9	2.00162	2.27735	0.90148
chr1	74552309	74553441	9	2.01679	2.44099	0.98665
chr1	74634579	74635040	114	6.73155	13.8943	11.4711
chr1	74647692	74648193	222	9.65007	24.3827	22.2405
chr1	75139248	75139514	346	13.1003	37.1056	34.6674
chr1	75164837	75165117	295	10.8735	31.61	29.519
chr1	75188654	75189053	367	13.0831	39.7446	36.7899
chr1	75218104	75218451	283	10.707	31.0694	28.3266
chr1	75432287	75432640	285	12.283	31.6283	28.5172
chr1	75475413	75475806	63	3.31574	7.19818	6.3273
chr1	75555955	75556593	123	6.2654	14.0135	12.342
chr1	75592270	75592618	80	5.33166	10.0482	8.04372
chr1	75597072	75598603	13	2.31479	2.90804	1.39778
chr1	75751309	75751550	27	3.60592	4.87142	2.7359
chr1	77450536	77450879	8	2.17165	2.40904	0.85388
chr1	78005483	78005874	9	2.13716	2.43869	0.982
chr1	79715400	79715641	53	4.33046	7.16087	5.37752
chr1	79757943	79758454	21	2.74297	3.75313	2.19501
chr1	79772459	79773035	12	2.47067	2.96638	1.27554
chr1	80336697	80337392	3	1.26986	1.23023	0.37383
chr1	82279533	82280216	13	2.53572	3.08602	1.30614
chr1	82312823	82313376	13	2.90601	3.48717	1.32222
chr1	82721092	82721694	17	2.73716	3.51391	1.71718
chr1	82835928	82836478	14	2.38227	2.94772	1.43769
chr1	84835583	84836823	19	2.7709	3.63232	1.9331
chr1	84845358	84845885	41	3.42492	5.87136	4.10802
chr1	84857693	84858262	15	2.34151	2.99038	1.56956
chr1	84865288	84866265	10	2.20099	2.54481	1.03414
chr1	84868566	84869192	8	1.9798	2.21135	0.86747
chr1	84886969	84887871	30	3.03245	4.71768	3.04109
chr1	85273695	85274245	11	2.27899	2.73192	1.17039
chr1	87791439	87791979	3	1.17106	1.06924	0.31294
chr1	87960745	87961228	39	3.73642	5.70538	3.9438
chr1	88199865	88200248	25	3.46848	4.67181	2.59654
chr1	88205673	88207985	28	2.97287	4.32146	2.87973
chr1	88254655	88256707	55	4.16103	7.45473	5.52133
chr1	88338676	88339639	112	5.72449	13.3119	11.2202
chr1	88368271	88368942	117	6.07281	13.5987	11.7754
chr1	88383454	88385686	32	3.24675	4.91643	3.21685
chr1	88400327	88401076	17	2.38082	3.25788	1.75504
chr1	88406093	88406370	16	2.52766	3.34671	1.61461
chr1	88420425	88425138	119	6.43026	13.8493	11.9625
chr1	88483489	88483952	189	9.67142	21.3945	18.9101
chr1	89051144	89051458	12	2.43378	2.97419	1.28167
chr1	89110245	89110945	50	3.60957	6.78033	5.04166
chr1	89209900	89210778	60	3.99446	7.64016	6.0731
chr1	89223399	89224003	20	2.56685	3.54931	2.05898
chr1	89572613	89572854	15	2.77005	3.37824	1.53664
chr1	89652375	89652740	3	1.29272	1.22773	0.37162
chr1	89749747	89750395	68	5.10164	8.90918	6.82699
chr1	89904843	89905209	157	8.14826	18.0254	15.7569
chr1	90040976	90042046	227	10.6454	25.3493	22.7154
chr1	90102046	90102441	177	7.69765	20.0089	17.7818
chr1	90173982	90174340	115	6.27386	13.7992	11.5808
chr1	90181568	90181882	37	3.48771	5.68247	3.79939
chr1	90353250	90353615	24	3.11938	4.20413	2.42767
chr1	90912379	90912934	21	3.04042	4.03621	2.1988
chr1	90939637	90939878	4	1.30613	1.29387	0.4387
chr1	91023738	91024185	27	3.31199	4.65458	2.73888
chr1	91027791	91028297	30	3.02568	4.73092	3.0236
chr1	91084944	91085961	13	1.80627	2.61812	1.3456
chr1	91543358	91544006	18	2.55061	3.36075	1.80643
chr1	91767086	91767505	118	7.61688	14.5894	11.8035
chr1	91826837	91827293	24	2.99108	4.19852	2.46798
chr1	92172389	92172776	51	4.4152	7.08736	5.12905
chr1	92179966	92180243	18	2.38188	3.16818	1.89466
chr1	92499881	92500317	7	1.96355	2.13528	0.75765
chr1	92657558	92657931	11	2.425	2.89656	1.15584
chr1	92939981	92940882	25	2.76224	4.51061	2.51552
chr1	93041238	93041547	35	2.8356	5.28535	3.5567
chr1	93294759	93295684	153	7.58178	17.6994	15.3923
chr1	93356011	93356281	205	9.54611	23.1311	20.5439
chr1	94077177	94077592	92	6.06176	11.5101	9.29084
chr1	94370238	94370527	42	3.95683	6.19821	4.22675
chr1	94592367	94593591	9	1.91155	2.30088	0.95738
chr1	94785356	94785597	23	2.97634	4.31696	2.31468
chr1	94807341	94807907	11	2.30163	2.67981	1.1223
chr1	95202137	95202685	11	2.48888	2.96041	1.16851
chr1	95239962	95240774	12	2.45982	2.98051	1.26668
chr1	95374899	95376113	21	2.96097	3.91021	2.1345
chr1	95531974	95533044	58	4.95585	8.08563	5.89406
chr1	95581868	95583082	28	3.17504	4.5148	2.87667
chr1	95650645	95651863	15	2.40646	3.10423	1.51713
chr1	95698209	95698567	19	2.20614	3.2723	1.90066
chr1	95700186	95700856	42	3.63784	5.98748	4.21708
chr1	95721866	95722302	39	3.44053	5.44134	3.96046
chr1	97533263	97533656	5	1.26898	1.35668	0.56028
chr1	99320076	99320317	16	1.9979	2.77301	1.63023
chr1	99665921	99667037	20	2.80979	3.83519	2.08147
chr1	100016014	100016740	16	2.59487	3.31005	1.67432
chr1	107559849	107560981	83	5.22081	10.2073	8.32394
chr1	107826760	107827183	64	4.58863	8.31935	6.44217
chr1	107887226	107888399	13	2.09905	2.63004	1.35106
chr1	107890353	107890792	14	2.35683	2.93304	1.49939
chr1	108461277	108462156	41	3.96472	6.15718	4.12698
chr1	108692845	108693571	18	2.55433	3.38455	1.86125
chr1	109142153	109142485	19	2.2731	3.32347	1.98592
chr1	112671210	112671541	13	2.41488	3.00286	1.39465
chr1	114351176	114351453	18	2.53312	3.35271	1.80784
chr1	116080507	116080757	7	1.93889	2.19923	0.7486
chr1	116453404	116453985	8	1.73319	2.04824	0.88783
chr1	120171797	120172142	10	1.84408	2.47126	1.01121
chr1	120207550	120208033	15	2.52917	3.23416	1.51172
chr1	120218121	120218664	25	2.97083	4.11925	2.51859
chr1	120285555	120285825	9	1.83638	2.10934	0.98637
chr1	120355879	120356120	17	2.69555	3.46141	1.74599
chr1	120950169	120950945	102	5.8044	11.9981	10.2609
chr1	121194930	121195173	332	15.2344	36.8493	33.2933
chr1	121196479	121196720	259	11.6048	28.5762	25.9815
chr1	121199087	121199359	324	13.9393	35.3844	32.4176
chr1	121245038	121245347	326	13.5059	35.3539	32.6259
chr1	121393420	121394432	263	11.0131	28.6219	26.377
chr1	121422667	121423131	402	15.517	43.5868	40.2532
chr1	121434550	121434901	325	11.537	35.3867	32.5664
chr1	121545374	121545617	174	6.56494	19.1674	17.4815
chr1	121733836	121734249	190	7.22772	21.2544	19.0378
chr1	121782884	121783675	60	3.72534	7.83133	6.05354
chr1	121893709	121893950	9	1.71596	2.11482	0.95732
chr1	122017779	122018081	10	2.0796	2.44862	1.08874
chr1	123224137	123224428	9	1.94292	2.27489	0.93625
chr1	123316189	123316512	12	2.49995	3.19688	1.26226
chr1	127331461	127332543	14	2.30224	2.92008	1.45605
chr1	127392136	127392440	19	2.93526	3.92127	1.92549
chr1	127584569	127585182	9	2.08865	2.52422	0.93079
chr1	129101320	129101711	8	2.04395	2.24938	0.81671
chr1	129670593	129671313	18	2.56682	3.38864	1.80925
chr1	129765220	129765642	10	2.23744	2.57811	1.04732
chr1	129999331	129999818	10	1.90227	2.26873	1.0947
chr1	130140426	130141294	14	2.69797	3.31652	1.41852
chr1	130255646	130256219	45	3.95756	6.40059	4.59399
chr1	132359010	132359251	21	2.97443	3.93234	2.18639
chr1	132612540	132614334	78	5.82478	10.1744	7.89775
chr1	132993767	132994470	13	2.43462	2.92587	1.34169
chr1	133049676	133050143	12	2.16626	2.5994	1.25138
chr1	133165213	133165640	62	4.59321	8.24082	6.23452
chr1	133458637	133458901	18	2.35057	3.13643	1.86463
chr1	133625294	133625688	13	2.26178	2.7392	1.33606
chr1	133662045	133662371	7	1.87892	2.05781	0.76621
chr1	133786923	133787237	13	2.36671	3.09602	1.37499
chr1	133806522	133807630	30	3.15249	4.72035	3.07011
chr1	133904402	133905207	14	3.06489	3.79459	1.47662
chr1	134097259	134097826	9	2.13901	2.44336	0.99835
chr1	134160346	134161551	11	2.28013	2.64915	1.10314
chr1	134185079	134185427	29	3.57016	4.9977	2.91673
chr1	134187741	134188732	12	1.60664	2.02835	1.22766
chr1	134195845	134196086	24	2.91755	4.34871	2.47063
chr1	134313866	134314427	17	2.46522	3.27689	1.78318
chr1	134483426	134483683	24	3.60867	4.73588	2.46279
chr1	134775460	134775718	18	2.62564	3.37756	1.82793
chr1	134921655	134922240	19	2.70681	3.58368	1.97344
chr1	134942449	134943237	20	2.83454	3.83061	2.05456
chr1	134991677	134992214	15	2.67488	3.55479	1.5215
chr1	135027604	135028212	17	1.95052	3.13405	1.72003
chr1	135074130	135074515	82	4.80063	10.5228	8.23984
chr1	135243754	135244166	77	3.99278	9.31351	7.7006
chr1	135259989	135260534	97	4.37975	11.5001	9.74523
chr1	135282023	135282266	42	2.46882	5.5061	4.2231
chr1	135294145	135294421	55	3.27888	7.55549	5.56785
chr1	135506445	135507059	10	2.18654	2.64928	1.06973
chr1	135557272	135558350	33	3.26054	4.94593	3.33554
chr1	135564313	135565682	7	1.99915	2.20329	0.79264
chr1	135566951	135567247	8	2.109	2.34079	0.81802
chr1	135590692	135591454	13	2.49039	3.00338	1.3779
chr1	135875563	135875952	12	2.51262	2.95201	1.21646
chr1	136223097	136223548	114	6.20463	13.3209	11.4749
chr1	136241244	136241567	96	4.92671	11.4911	9.63942
chr1	136258288	136258806	38	3.27582	5.71416	3.84365
chr1	136302247	136302488	8	1.93834	2.17408	0.80748
chr1	136391121	136391362	13	2.57091	3.06775	1.33393
chr1	136421069	136421617	18	2.92581	3.75918	1.81512
chr1	136431663	136433113	35	3.80537	5.54465	3.52642
chr1	136437464	136437940	41	3.45652	5.54398	4.1073
chr1	136456518	136457833	26	2.99174	4.31089	2.65415
chr1	136852220	136852772	19	2.80593	3.66348	1.99327
chr1	136883739	136884515	42	4.04372	6.15459	4.20104
chr1	137001408	137001649	37	4.16463	6.02794	3.79205
chr1	137005290	137006632	30	3.29727	4.72856	3.01685
chr1	137131268	137131665	17	2.69791	3.42851	1.75475
chr1	137153016	137153301	16	2.57685	3.23839	1.64969
chr1	137209961	137210505	56	3.87856	7.43819	5.61749
chr1	137326731	137327243	46	4.06761	6.66395	4.62687
chr1	137662742	137663861	11	2.52865	3.02914	1.18802
chr1	137743839	137744104	11	2.07675	2.47083	1.13393
chr1	137914690	137915042	10	2.38177	2.74885	1.0982
chr1	138311824	138312605	78	5.55695	9.97964	7.86617
chr1	138462877	138463137	8	1.87846	2.06944	0.81054
chr1	138466307	138467102	14	2.59604	3.13288	1.4051
chr1	140753065	140753558	42	4.03278	6.21354	4.25966
chr1	141019165	141019564	13	2.6336	3.13982	1.34234
chr1	145549501	145550063	11	2.38611	2.84648	1.15336
chr1	147102520	147102910	16	2.43655	3.16125	1.67398
chr1	152239815	152240690	40	3.72141	5.88172	4.07496
chr1	152872453	152872871	4	1.48707	1.49124	0.48549
chr1	153191621	153191873	10	1.89566	2.419	1.04238
chr1	153275373	153276232	10	2.15547	2.49097	1.05041
chr1	153347543	153348201	52	4.08131	6.89939	5.29381
chr1	153391820	153392492	57	4.0302	7.20727	5.73859
chr1	153417869	153418115	115	7.08535	13.948	11.5791
chr1	153602179	153602954	66	4.92246	8.88688	6.62709
chr1	153708258	153708507	71	5.66954	9.7071	7.18027
chr1	153917651	153917941	9	1.98223	2.32356	0.99467
chr1	154122294	154122651	7	1.96366	2.14252	0.73705
chr1	154233490	154233832	8	2.1236	2.38157	0.85974
chr1	154246963	154247454	16	2.97222	3.66912	1.68512
chr1	154626572	154626891	12	2.35487	2.8267	1.2794
chr1	154749476	154750214	28	3.18665	4.63971	2.82149
chr1	154762237	154763181	113	6.17911	13.0991	11.3264
chr1	154856928	154858029	211	9.44544	23.282	21.1755
chr1	154859005	154860086	117	5.92783	13.2925	11.7497
chr1	154878676	154879385	66	3.65836	7.68358	6.66975
chr1	154938216	154939497	46	3.81374	6.32916	4.61161
chr1	154940512	154941151	17	2.63254	3.35723	1.76878
chr1	154942550	154943474	18	2.51429	3.24539	1.80006
chr1	155038272	155038737	33	3.19355	4.84658	3.30187
chr1	155066461	155066817	20	2.63061	3.51654	2.0727
chr1	155179317	155179754	10	2.25727	2.61237	1.09722
chr1	155261341	155261686	7	2.03191	2.19553	0.7334
chr1	155272147	155272436	8	1.95999	2.17889	0.84767
chr1	155334631	155334878	8	2.08649	2.31327	0.80398
chr1	155434965	155435431	7	1.40554	1.59264	0.73846
chr1	155746948	155747260	21	2.2264	3.29199	2.14161
chr1	156903115	156903514	41	3.35171	5.72652	4.18371
chr1	157005590	157006837	49	3.68801	6.57191	4.95145
chr1	157264292	157264608	127	6.91349	15.0832	12.7696
chr1	157331344	157331929	220	10.856	25.3774	22.0802
chr1	157363704	157364006	197	9.16266	22.344	19.7976
chr1	157564548	157564817	205	8.54099	23.0756	20.5569
chr1	157820096	157820850	125	6.19608	14.6317	12.5729
chr1	157882489	157883642	48	3.87309	6.86743	4.84825
chr1	157887839	157888234	9	1.87647	2.47732	0.98431
chr1	158488446	158489228	33	3.6342	5.24993	3.34422
chr1	158884512	158884815	8	1.94938	2.1612	0.83058
chr1	159370385	159370789	36	3.28176	5.36132	3.66734
chr1	160809498	160809797	117	4.8733	13.6483	11.767
chr1	161162204	161162478	98	4.15052	11.452	9.85369
chr1	162125251	162125721	42	3.11788	5.92679	4.23683
chr1	162142926	162143570	15	2.14071	2.8937	1.52754
chr1	162836487	162836890	70	4.69136	8.77967	7.08264
chr1	162965104	162965715	42	3.81311	6.104	4.26307
chr1	163000558	163001193	11	2.15571	2.57042	1.10024
chr1	163180555	163181309	18	2.7012	3.45705	1.82923
chr1	163699588	163699829	43	4.44596	6.59988	4.30303
chr1	163807044	163808214	68	5.39565	9.05507	6.81092
chr1	163993666	163993910	110	6.81957	13.1754	11.0014
chr1	164050520	164050886	132	7.30951	15.5231	13.2088
chr1	164477977	164478722	42	3.36429	6.07624	4.28038
chr1	164500434	164500770	11	2.37659	2.77177	1.15493
chr1	164545585	164546142	22	2.7658	3.90763	2.29521
chr1	164670037	164670861	28	3.32484	4.71279	2.86761
chr1	164762535	164762781	29	3.29873	4.89638	2.93305
chr1	165333867	165334128	35	2.96986	5.0342	3.50346
chr1	165859667	165860669	66	4.42515	8.51975	6.65341
chr1	165949966	165950262	84	5.35324	10.2983	8.44377
chr1	166237273	166237712	230	10.8768	25.5502	23.0984
chr1	166245448	166245729	317	14.2697	34.7653	31.7738
chr1	166383511	166384399	149	7.19753	16.6644	14.9239
chr1	166385842	166386955	131	6.54694	14.884	13.183
chr1	166424402	166425255	49	3.91296	6.63401	4.93352
chr1	166507041	166507282	11	2.57355	3.04503	1.13011
chr1	167166897	167167685	11	1.43512	1.77271	1.11311
chr1	167334689	167334930	62	5.13455	8.47769	6.27862
chr1	167390705	167391317	36	3.45956	5.3059	3.63937
chr1	167547760	167548263	6	1.37632	1.45414	0.60446
chr1	167564759	167565414	8	1.81386	2.0601	0.89922
chr1	167693867	167694108	15	1.96932	2.57474	1.58375
chr1	167932481	167933483	53	4.56512	7.3526	5.32886
chr1	168057091	168057383	92	6.30414	11.5088	9.25403
chr1	168168753	168168994	184	10.1372	21.2849	18.489
chr1	168339492	168340111	382	16.0125	41.285	38.2714
chr1	168354968	168355292	423	16.7412	45.3267	42.3924
chr1	169213740	169215430	518	19.2731	55.1189	51.8551
chr1	169238472	169239038	536	19.6989	57.0294	53.6428
chr1	169324094	169324338	419	13.352	44.8751	41.9293
chr1	169846157	169846459	319	9.99162	34.8875	31.9027
chr1	172145261	172145749	53	3.5504	7.39523	5.36092
chr1	172185663	172186018	8	1.8918	2.13803	0.82687
chr1	172623719	172624065	24	3.26298	4.39206	2.49443
chr1	172801647	172802075	25	3.56073	4.7407	2.55027
chr1	172815001	172815734	13	2.41488	2.90339	1.33538
chr1	172968171	172968893	21	2.32296	3.75742	2.17668
chr1	173080416	173080923	73	4.86631	9.24773	7.35513
chr1	173152253	173152959	17	2.62958	3.34059	1.72024
chr1	173176986	173177655	32	3.23144	4.90743	3.22272
chr1	173181556	173183186	17	2.60937	3.37764	1.73341
chr1	173199724	173200794	26	2.99966	4.39626	2.69393
chr1	173217649	173218391	29	3.1346	4.61587	2.95246
chr1	173224465	173225319	42	3.42323	5.79627	4.23982
chr1	173258749	173260644	23	2.58979	3.9986	2.33027
chr1	173275636	173276118	46	3.74074	6.58088	4.63707
chr1	173340871	173341828	31	3.16657	4.75213	3.11057
chr1	173395812	173396359	9	1.98426	2.23756	0.91855
chr1	173432482	173434353	68	4.92892	8.76128	6.86284
chr1	174012600	174013057	12	2.41853	2.85789	1.2046
chr1	174056312	174057437	19	2.25997	3.45657	1.9275
chr1	174078051	174078572	13	2.59013	3.11431	1.33357
chr1	174231749	174232221	21	2.67157	3.58293	2.1257
chr1	174256414	174256792	14	2.32093	2.85147	1.43407
chr1	174298887	174299429	44	3.92472	6.32059	4.43298
chr1	174450152	174451077	19	2.71608	3.78547	1.90406
chr1	177555626	177555932	8	2.32063	2.58387	0.89266
chr1	177805831	177806079	10	2.01831	2.32819	1.02482
chr1	177810687	177811154	30	3.21791	4.65916	3.02973
chr1	177908839	177909146	81	6.09204	10.5341	8.11116
chr1	179726260	179727110	16	2.52495	3.20186	1.68705
chr1	179738533	179738842	8	2.14289	2.35655	0.8101
chr1	179913082	179913843	52	4.29733	7.15943	5.27315
chr1	180117326	180117867	24	3.0644	4.30617	2.48772
chr1	180248280	180250010	21	2.73259	3.74003	2.17451
chr1	180266634	180268388	193	9.2795	21.4966	19.3804
chr1	180335824	180337067	138	7.0649	15.9514	13.8544
chr1	180457382	180458886	217	9.45707	23.8698	21.7397
chr1	180474657	180475048	136	6.40734	15.176	13.6191
chr1	181476340	181476804	145	8.71276	17.5531	14.5804
chr1	181598355	181598626	24	2.30382	3.50965	2.47514
chr1	181733362	181734371	28	3.03194	4.45868	2.87422
chr1	181889583	181890379	13	2.26252	2.79349	1.3629
chr1	182156179	182157375	48	4.40481	6.89279	4.82955
chr1	182499232	182499503	7	1.53312	1.69149	0.79078
chr1	182571200	182572098	32	3.42689	5.16261	3.24005
chr1	182656199	182656468	90	5.11579	11.0048	9.0541
chr1	182698194	182698999	141	5.6304	16.1071	14.1073
chr1	182704796	182705177	120	4.70524	13.9624	12.0651
chr1	182742771	182744540	117	5.64962	13.909	11.782
chr1	182781083	182781478	19	2.67246	3.66913	1.99157
chr1	182818919	182819160	8	1.55813	1.76789	0.88942
chr1	183073917	183074571	22	2.66452	3.68106	2.21439
chr1	183141930	183142301	78	5.04027	9.68942	7.80884
chr1	183209939	183210201	95	5.26851	11.1269	9.5013
chr1	183775292	183775565	71	5.01659	9.09265	7.17916
chr1	184054788	184055597	26	3.29179	4.55272	2.68744
chr1	184271181	184271947	16	2.66949	3.36111	1.61138
chr1	184338649	184338982	13	2.47817	2.97684	1.34584
chr1	184420032	184420273	6	1.62522	1.69644	0.60278
chr1	184431027	184431396	9	2.0045	2.27211	0.94759
chr1	184469453	184469806	10	2.24791	2.58703	1.06166
chr1	184889961	184890580	6	1.94109	2.07738	0.68715
chr1	187940698	187941328	52	4.011	6.98344	5.25697
chr1	188295351	188295660	43	3.60032	6.0143	4.38053
chr1	188421944	188422525	38	3.55995	5.63214	3.87954
chr1	188572887	188573450	73	5.06523	9.20299	7.31322
chr1	188790817	188791759	37	3.77858	5.75128	3.78414
chr1	188840364	188840681	61	3.81012	7.37974	6.1696
chr1	189039325	189039575	119	6.61142	13.9999	11.9609
chr1	189202077	189202535	42	3.14556	5.65962	4.22632
chr1	189548744	189549042	6	1.71257	1.81726	0.66683
chr1	189798333	189798574	21	3.08299	4.06529	2.19027
chr1	190831329	190831877	18	2.66753	3.43581	1.80064
chr1	191097596	191097943	18	2.82395	3.68147	1.86321
chr1	192139981	192140349	28	3.03073	4.36537	2.8614
chr1	192307191	192307435	25	2.94423	4.12394	2.59551
chr1	192735460	192735839	10	1.81483	2.22829	1.07847
chr1	192752182	192752757	17	2.3772	3.43366	1.76944
chr1	192849806	192850143	20	2.13231	3.53032	2.09501
chr1	192886655	192887207	11	2.1202	2.51741	1.10121
chr1	193141353	193142076	13	2.70233	3.21194	1.34818
chr1	193149507	193150101	43	3.77285	6.08292	4.32243
chr1	193399327	193399906	31	3.39948	5.01101	3.14489
chr1	193541561	193541960	19	2.36419	3.24097	1.9488
chr1	193704295	193704595	22	3.34875	4.43028	2.26899
chr1	193730763	193731488	11	2.44649	2.86479	1.18786
chr1	193961719	193962272	9	2.27799	2.70369	0.97275
chr1	194268237	194268494	6	1.75593	2.04022	0.6962
chr1	194861623	194861973	14	2.59174	3.15225	1.45404
chr1	194999190	194999934	16	2.499	3.18744	1.66237
chr1	195582071	195582339	11	2.52604	2.93682	1.10938
chr1	196035402	196035643	10	2.43972	2.80993	1.09666
chr1	196846515	196846909	27	3.47026	4.74204	2.72469
chr1	196957299	196957810	14	2.29472	2.92249	1.47562
chr1	197067731	197068037	37	3.27313	5.54022	3.76055
chr10	3134338	3134738	10	2.64136	2.98873	1.01386
chr10	4540150	4541049	10	2.20768	2.54182	1.0522
chr10	5435209	5435546	39	3.85427	5.82942	3.96502
chr10	5913810	5914177	11	2.45752	2.96148	1.10565
chr10	5970769	5971105	12	2.68497	3.19214	1.28861
chr10	5977222	5977483	8	2.17017	2.42174	0.88857
chr10	6013178	6013568	16	2.57207	3.38231	1.69816
chr10	6079713	6080736	11	2.24011	2.94301	1.17292
chr10	6097053	6097330	18	2.88818	4.00263	1.88932
chr10	6238502	6238877	19	2.50991	3.59193	1.98814
chr10	6412742	6413096	15	2.97291	3.61552	1.58137
chr10	7400717	7401284	11	2.29459	2.719	1.18282
chr10	7500217	7500857	11	2.24172	2.62355	1.13973
chr10	7512344	7512977	26	2.96117	4.31012	2.64844
chr10	7675808	7676371	16	2.65467	3.37341	1.63353
chr10	7853066	7853307	10	2.46444	2.8612	1.07723
chr10	8299894	8300978	11	2.76378	3.19395	1.15026
chr10	8552371	8552760	15	2.92002	3.56136	1.51881
chr10	10277740	10278082	93	5.47967	10.9534	9.36662
chr10	10869103	10869344	111	6.31259	12.8959	11.1225
chr10	11063157	11063812	58	4.5537	7.74465	5.87101
chr10	11275088	11275522	8	2.16065	2.40254	0.87495
chr10	11355342	11355781	17	3.30402	4.03485	1.71336
chr10	12329830	12330169	36	3.50999	5.34018	3.68717
chr10	12631244	12632810	22	2.7949	3.94417	2.2081
chr10	12642353	12642664	50	3.18414	6.40607	5.06798
chr10	12727904	12728475	117	5.39728	13.714	11.789
chr10	12912610	12913106	157	6.98023	17.7571	15.7921
chr10	13272811	13273188	141	6.71252	16.1841	14.1538
chr10	13588375	13588673	162	7.77521	18.635	16.2686
chr10	13612491	13612732	20	1.50207	2.56443	2.05371
chr10	14425150	14425489	104	6.07585	12.81	10.4953
chr10	16957442	16957833	21	2.51421	3.67921	2.1671
chr10	17515816	17516115	66	4.69742	8.51897	6.69159
chr10	17722669	17722947	140	7.37885	16.2284	14.0511
chr10	17742326	17743058	161	7.63268	18.7635	16.149
chr10	17775203	17775683	124	6.60902	14.5743	12.4408
chr10	18182872	18183172	45	4.08073	6.51862	4.54338
chr10	18311497	18311738	10	2.62853	3.02871	1.06128
chr10	18565002	18565520	16	2.76052	3.43351	1.62308
chr10	18627089	18627609	59	4.72106	7.92096	5.99104
chr10	19627144	19627707	16	2.7872	3.46833	1.63729
chr10	19638531	19638864	7	1.71987	1.86594	0.72994
chr10	19654116	19654596	9	1.95171	2.3041	0.97365
chr10	19809993	19812371	19	2.4277	3.42986	1.97233
chr10	19868490	19868964	18	2.23821	3.19694	1.87458
chr10	20031999	20032890	16	2.55346	3.42046	1.69669
chr10	20346204	20346491	48	4.39172	7.26924	4.81973
chr10	20671599	20672299	24	2.74706	4.0613	2.4144
chr10	21015609	21016129	10	2.06701	2.44219	1.07635
chr10	21312627	21312949	8	2.08828	2.32124	0.87081
chr10	21568042	21568370	8	1.85557	2.04548	0.80903
chr10	21714259	21715429	8	1.77127	2.04601	0.87585
chr10	21868736	21869068	16	2.33322	3.01054	1.64159
chr10	22451096	22451337	8	1.86488	2.09565	0.86639
chr10	23506820	23507377	11	2.22943	2.58191	1.10325
chr10	23532787	23533361	46	4.28776	6.68651	4.67728
chr10	23851427	23852449	18	2.40141	3.17412	1.83501
chr10	24335702	24336792	23	2.8244	3.84231	2.31068
chr10	24589653	24590046	12	2.35821	2.78556	1.22021
chr10	24748609	24748887	16	2.53514	3.19614	1.67727
chr10	25016604	25016845	9	2.41193	2.74484	0.99296
chr10	25152054	25152501	15	2.1825	2.77907	1.53798
chr10	26678121	26678381	11	2.09561	2.5549	1.16569
chr10	27731996	27732900	24	3.16594	4.40252	2.44623
chr10	27794293	27795137	27	3.20783	4.61815	2.78978
chr10	28916389	28916792	10	2.37894	2.72863	1.01731
chr10	29919977	29920277	10	2.40167	2.72683	1.02631
chr10	29935615	29935921	7	1.86609	2.03882	0.76706
chr10	30320055	30320646	9	1.96465	2.23969	0.92411
chr10	30337968	30338645	46	3.89748	6.5397	4.63515
chr10	30522490	30523310	90	5.8055	11.0883	9.01784
chr10	30931988	30932234	22	2.78298	3.87705	2.21265
chr10	31033208	31033611	28	3.26943	4.62086	2.81765
chr10	32898587	32898909	15	2.56212	3.17244	1.55663
chr10	33343975	33344628	25	3.47093	4.67226	2.52049
chr10	33953526	33953991	4	1.34393	1.29894	0.40295
chr10	36651893	36652217	14	2.48945	3.16133	1.48483
chr10	36693766	36694029	27	2.67649	4.57212	2.78852
chr10	36858576	36858913	18	2.45498	3.4611	1.82011
chr10	38891038	38891310	8	1.81112	2.07835	0.82644
chr10	39451425	39453043	68	4.15377	8.664	6.84411
chr10	39679901	39680653	194	7.92472	21.6973	19.4294
chr10	39932435	39933441	253	9.64301	27.9025	25.3439
chr10	39966522	39967273	110	4.99849	12.9311	11.0718
chr10	39977169	39978599	13	2.31215	2.83646	1.33385
chr10	40021810	40022729	86	5.36975	10.4885	8.61211
chr10	40255910	40256963	20	2.73592	3.84398	2.06096
chr10	40359601	40360548	6	1.69072	1.80159	0.67535
chr10	40602701	40604514	13	2.24353	2.89765	1.33452
chr10	41022615	41023451	72	3.5458	8.90728	7.27186
chr10	41169701	41170183	145	5.76976	16.263	14.5079
chr10	41210172	41210517	147	6.1698	16.5302	14.7292
chr10	41238363	41239813	144	7.4584	16.6107	14.4946
chr10	41285040	41286010	18	2.75673	3.57794	1.88307
chr10	41326829	41327497	76	5.16742	9.57229	7.67465
chr10	41529216	41529737	62	4.62486	8.11445	6.29399
chr10	41549900	41550141	34	3.61426	5.34827	3.4787
chr10	41717684	41718111	14	2.71648	3.30995	1.4862
chr10	41738233	41738474	7	1.78563	1.93795	0.72027
chr10	41750932	41751173	29	3.01691	4.42605	2.95091
chr10	41997177	41997805	11	2.02165	2.43998	1.13336
chr10	42197181	42198446	11	2.28568	2.76194	1.17854
chr10	42221743	42222279	7	1.88902	2.0566	0.7374
chr10	42568975	42569320	11	2.29157	2.69132	1.10433
chr10	42584438	42584706	11	2.44457	2.94793	1.15051
chr10	42801448	42801768	12	2.21065	2.80771	1.21873
chr10	42893858	42894444	8	1.43905	1.72299	0.81056
chr10	42941077	42942091	21	2.66738	3.82801	2.16137
chr10	42975616	42975945	7	1.95586	2.14888	0.7895
chr10	43092564	43092835	6	1.83919	1.94912	0.63306
chr10	43197150	43197951	9	2.22184	2.50934	0.974
chr10	43298554	43298834	10	2.39209	2.72014	1.02095
chr10	43325786	43326028	8	1.89812	2.10426	0.83726
chr10	43612489	43612730	47	4.73096	7.13281	4.72044
chr10	43621252	43621827	11	2.36174	2.75538	1.14691
chr10	43988213	43988454	5	1.72883	1.81019	0.59972
chr10	44147864	44148397	20	3.44308	4.4552	2.04446
chr10	44160784	44161322	16	2.63781	3.28503	1.61442
chr10	44176797	44177052	6	1.79074	1.88351	0.61592
chr10	44203291	44203602	9	2.43191	2.71859	0.92148
chr10	44786881	44787532	13	2.52654	3.03575	1.35266
chr10	45205078	45205442	10	2.24874	2.61745	1.09324
chr10	45558679	45558977	23	3.32104	4.38275	2.35862
chr10	46039368	46039613	12	1.81861	2.24731	1.26892
chr10	51140446	51140792	9	1.9726	2.27132	0.97207
chr10	51997976	51998784	7	1.67556	1.84496	0.7881
chr10	52101520	52102354	43	3.48344	5.90419	4.36087
chr10	52137108	52137649	91	5.62116	11.1931	9.17373
chr10	52265214	52265885	35	3.51553	5.31139	3.59487
chr10	52486857	52487196	8	2.03137	2.28441	0.84455
chr10	53299971	53300473	17	2.57302	3.37703	1.71915
chr10	53316565	53317450	12	2.39877	2.94012	1.29921
chr10	53336809	53337398	28	3.13598	4.47401	2.8201
chr10	53349078	53349408	30	3.40106	4.84079	3.02815
chr10	53470593	53471574	13	2.82274	3.32662	1.32943
chr10	55834866	55835762	27	3.34617	4.63904	2.7294
chr10	55963253	55963495	28	3.49583	4.81687	2.831
chr10	56006885	56007163	7	1.8254	1.97898	0.72716
chr10	57251881	57252357	7	1.91621	2.09972	0.74407
chr10	57686838	57687774	9	2.37905	2.67909	0.94908
chr10	57694602	57695393	12	2.2315	2.72994	1.21367
chr10	57909208	57910084	41	3.44123	5.91514	4.16908
chr10	59021297	59021646	8	1.96601	2.25402	0.88552
chr10	59040864	59041231	6	1.51941	1.6975	0.60898
chr10	59079172	59079472	6	1.89956	2.03773	0.69794
chr10	59257781	59258411	9	1.82273	2.34886	0.90987
chr10	59284585	59284826	17	2.63861	3.86345	1.75455
chr10	59342318	59342818	13	2.17238	2.83601	1.33312
chr10	59465663	59465974	12	2.5354	2.98275	1.23034
chr10	59637772	59638017	13	2.60443	3.19427	1.31333
chr10	59748583	59749171	4	1.35115	1.32358	0.41422
chr10	60149949	60150478	14	2.47497	3.09087	1.45025
chr10	60543258	60543560	56	4.03329	7.28946	5.6376
chr10	60549570	60550654	34	3.05431	4.91982	3.46752
chr10	60610511	60611291	38	3.99068	6.12996	3.8879
chr10	60736771	60737576	11	2.09733	2.53688	1.14146
chr10	60878935	60879756	10	2.25119	2.67716	1.09117
chr10	60915023	60915532	13	2.30034	2.76657	1.30113
chr10	61110639	61111117	18	2.53585	3.37216	1.82641
chr10	61158123	61158688	10	2.07086	2.41466	1.08192
chr10	61245511	61246882	71	4.31613	9.03807	7.14759
chr10	61340629	61340972	184	7.52852	20.7679	18.4699
chr10	61559574	61559947	250	10.5111	28.0444	25.0711
chr10	61776984	61777655	133	6.42216	15.3779	13.395
chr10	61803170	61803472	87	5.18413	10.9185	8.76986
chr10	61912274	61914461	114	5.5112	13.5377	11.4568
chr10	62040903	62041878	270	8.31131	29.3929	27.0243
chr10	62120814	62121423	170	4.98127	19.1413	17.0504
chr10	62254417	62255895	113	4.66999	13.4622	11.3411
chr10	62327906	62328201	33	3.9232	5.57365	3.36262
chr10	62346903	62347144	31	3.13533	4.75988	3.19646
chr10	62355584	62355939	9	1.56912	1.87706	0.97274
chr10	62383137	62383466	11	2.48888	2.88003	1.13292
chr10	62453565	62453897	51	4.398	7.08935	5.17138
chr10	62485811	62487313	23	2.98247	4.0735	2.37513
chr10	62707413	62707804	6	1.7084	1.8161	0.65644
chr10	62801373	62802286	15	2.37329	3.05897	1.54477
chr10	62892201	62892883	145	7.19023	16.4146	14.514
chr10	64679129	64679455	305	12.449	33.3738	30.5269
chr10	66327208	66327621	215	7.87529	23.9782	21.5415
chr10	66383085	66384431	91	4.3741	11.0668	9.12262
chr10	66465247	66466259	10	1.9918	2.5688	1.05332
chr10	66559258	66559713	10	2.51451	2.87905	1.07327
chr10	66998219	66999138	34	3.7728	5.47301	3.4899
chr10	67011163	67012290	13	2.49797	2.99938	1.33072
chr10	67111288	67111832	65	4.56483	8.19383	6.58933
chr10	67492359	67492601	197	10.0888	22.2652	19.7612
chr10	67513682	67513964	120	6.732	13.9304	12.0755
chr10	67553960	67554877	78	5.01298	9.43528	7.81523
chr10	67599151	67601077	19	2.85038	3.72032	1.98711
chr10	67619596	67620345	49	4.49388	7.13459	4.97945
chr10	67820131	67820397	25	3.00706	4.50358	2.54809
chr10	68786786	68788054	12	2.69613	3.32028	1.28734
chr10	68790505	68790993	18	2.77844	3.57516	1.89727
chr10	69034476	69035225	10	2.13241	2.43682	1.00799
chr10	69558012	69558611	8	2.15318	2.38948	0.86304
chr10	69559767	69560210	14	2.63531	3.17914	1.42759
chr10	69707893	69708134	10	2.09631	2.40949	1.02285
chr10	69745353	69745697	6	1.90399	2.0251	0.66435
chr10	69799220	69799485	10	2.53258	2.8832	1.04355
chr10	69831537	69831994	11	2.66656	3.08032	1.15619
chr10	70061761	70062570	82	6.47477	10.971	8.25137
chr10	70664343	70664610	109	5.53351	12.908	10.9031
chr10	70700600	70700841	139	6.1753	15.8847	13.9621
chr10	70747791	70748237	292	11.9409	32.415	29.2051
chr10	70807468	70807803	181	8.034	20.4298	18.182
chr10	70918562	70918896	80	4.19125	9.42752	8.07268
chr10	71187795	71188036	91	5.33026	11.1288	9.13004
chr10	71771790	71772072	44	3.75683	6.48257	4.41616
chr10	74382099	74382390	3	1.35096	1.29735	0.39431
chr10	74388106	74388409	8	2.1168	2.33703	0.82412
chr10	74886245	74886486	25	3.59278	4.87555	2.56006
chr10	74906903	74907912	70	4.90274	8.9271	7.0946
chr10	74980379	74980734	30	2.69371	4.49217	3.0306
chr10	75098329	75098842	23	2.99691	4.06123	2.37637
chr10	75111605	75112442	14	2.55964	3.11063	1.43221
chr10	75355890	75356313	123	7.25405	14.7477	12.3448
chr10	75383878	75384374	199	8.97141	22.0109	19.9098
chr10	75398612	75399136	148	7.52947	16.8654	14.8362
chr10	75438229	75438470	37	2.9899	4.93294	3.72685
chr10	75496741	75496987	15	2.50171	3.12791	1.59961
chr10	75499707	75499986	41	3.83053	5.90793	4.13517
chr10	75904965	75905626	8	2.03188	2.28226	0.89369
chr10	75931332	75931778	13	2.77023	3.26485	1.30201
chr10	76593524	76594427	7	1.72872	1.93805	0.79053
chr10	76640853	76641094	8	1.93488	2.13334	0.81524
chr10	76721869	76722326	44	4.00201	6.34924	4.42998
chr10	76978526	76978832	164	8.3415	18.4619	16.4255
chr10	77034856	77035097	137	6.76671	15.3232	13.7604
chr10	77068165	77069486	177	8.82725	19.8568	17.7565
chr10	77084823	77085325	99	6.40186	12.1918	9.98817
chr10	77472385	77472761	11	2.22994	2.70955	1.16324
chr10	77500845	77501177	7	1.94294	2.12144	0.76342
chr10	77510978	77512360	31	3.00448	4.64051	3.18326
chr10	77632164	77632639	49	3.67364	6.79237	4.96346
chr10	77723078	77723319	30	3.41564	4.83839	3.0175
chr10	77830318	77830559	8	1.95551	2.1693	0.84685
chr10	77875269	77875813	9	2.42126	2.71638	0.96327
chr10	77927142	77927823	24	2.70039	4.18077	2.49401
chr10	77944826	77945113	31	2.79004	4.94098	3.11908
chr10	78054649	78054890	9	1.57997	2.08704	0.97238
chr10	78560106	78560538	11	2.33839	2.74052	1.16913
chr10	78898080	78898363	8	1.64223	1.81961	0.81467
chr10	79017599	79018097	9	2.11594	2.42023	0.99422
chr10	79100426	79100800	34	3.45683	5.61574	3.43064
chr10	79131538	79134431	22	2.71206	3.91394	2.245
chr10	79144479	79145333	53	4.25048	7.29918	5.3981
chr10	79167134	79167449	30	3.27185	4.83052	3.01916
chr10	79209134	79209448	48	3.91636	6.76759	4.80527
chr10	79229502	79230264	95	5.42571	11.5389	9.59282
chr10	79303579	79304139	150	7.29419	17.0813	15.094
chr10	79316369	79318036	127	7.05984	14.816	12.7943
chr10	79371087	79371971	52	4.14891	7.01717	5.27899
chr10	79422636	79423388	18	2.71089	3.5794	1.80442
chr10	79446498	79447095	22	2.85666	4.03692	2.26984
chr10	79502147	79502593	10	2.24597	2.71002	1.09806
chr10	79516060	79517658	21	2.76697	3.73468	2.137
chr10	79519511	79520843	23	2.7896	3.97528	2.31978
chr10	79565120	79565617	27	3.12098	4.4682	2.75547
chr10	79577598	79579077	12	2.1601	2.61217	1.20928
chr10	79600931	79602265	15	2.56713	3.17789	1.54726
chr10	79604089	79605333	25	3.15693	4.32524	2.54297
chr10	79611474	79612115	21	2.74366	3.8504	2.10074
chr10	79630186	79631172	18	2.51234	3.46042	1.89949
chr10	79635655	79636000	12	2.45482	2.95579	1.24043
chr10	79711914	79712627	13	2.14232	2.90669	1.36845
chr10	79727384	79727848	20	2.33106	3.54349	2.01425
chr10	79754979	79755665	32	3.19265	4.96595	3.29539
chr10	79857937	79858178	26	2.49839	3.8039	2.61309
chr10	79861155	79862940	21	2.78638	3.81908	2.15654
chr10	79989454	79989882	9	2.08011	2.35452	0.91589
chr10	80023934	80024649	16	2.51214	3.31051	1.69839
chr10	80065615	80065935	10	2.22477	2.54492	1.02046
chr10	80118797	80119405	25	3.28426	4.47554	2.5269
chr10	80204651	80205290	19	2.58479	3.39926	1.9153
chr10	80217769	80218461	11	2.35767	2.74763	1.11313
chr10	80260714	80261598	14	2.59827	3.16223	1.45375
chr10	80270120	80270361	9	2.50126	2.8059	0.94694
chr10	80288842	80289854	22	2.75949	3.79664	2.24157
chr10	80317599	80318283	25	2.96532	4.21212	2.51785
chr10	80363231	80364005	8	2.08979	2.30386	0.82578
chr10	80380667	80381221	11	2.28068	2.68677	1.15485
chr10	80418522	80418824	18	2.79443	3.56049	1.8393
chr10	80500018	80500358	14	2.3528	2.90279	1.45503
chr10	80568470	80568921	29	3.06405	4.45157	2.95039
chr10	80600378	80601240	33	2.87865	4.75661	3.3779
chr10	80630165	80630675	48	4.09426	6.92799	4.83215
chr10	80639192	80639957	26	3.04984	4.31414	2.6152
chr10	80641001	80641513	24	2.83998	3.92933	2.42448
chr10	80645303	80645910	83	5.91762	10.568	8.36807
chr10	80655285	80655875	130	8.33286	15.8526	13.0594
chr10	80695828	80696158	73	5.49851	9.50058	7.3377
chr10	80729248	80729828	16	2.47155	3.13127	1.64293
chr10	80748522	80748763	12	2.43851	2.90343	1.27648
chr10	80783695	80783936	6	1.9241	2.05216	0.67231
chr10	80840871	80841352	21	2.73516	3.80239	2.18258
chr10	80846981	80847679	25	2.81406	4.0281	2.50427
chr10	80874495	80874778	25	2.66596	3.85864	2.56213
chr10	80893032	80893429	24	2.80297	3.93469	2.48809
chr10	80895570	80896212	38	3.61479	5.58444	3.84764
chr10	80958796	80959614	14	2.49782	3.05468	1.42942
chr10	81007453	81007876	49	4.22108	6.86464	4.93737
chr10	81021978	81022285	76	4.43668	9.52885	7.63326
chr10	81095980	81096313	63	3.61812	8.18446	6.37576
chr10	81511056	81511297	85	4.59798	10.8232	8.54972
chr10	81545911	81546313	77	4.13516	9.42412	7.78866
chr10	81590655	81591008	48	3.44043	6.06986	4.81863
chr10	81641020	81641397	16	2.35869	3.04264	1.68354
chr10	81703762	81704213	7	1.9317	2.13004	0.74296
chr10	81816723	81818380	21	2.60785	3.62302	2.17427
chr10	82161484	82162260	32	2.98662	4.88887	3.23891
chr10	82226034	82227030	66	4.28879	8.25374	6.61386
chr10	82261206	82261500	107	6.0474	12.7579	10.7404
chr10	82416402	82416655	112	5.77011	13.1394	11.2787
chr10	82806903	82807144	90	4.67382	10.7259	9.02712
chr10	83006369	83007434	19	2.36603	3.43459	1.95496
chr10	83083274	83083644	19	2.56907	3.52298	1.98301
chr10	83187474	83187715	35	3.95247	5.72609	3.59445
chr10	83196508	83196749	14	2.10159	2.66565	1.48606
chr10	83391922	83392380	17	2.70959	3.44248	1.77387
chr10	84085085	84085536	44	4.51758	6.90309	4.46877
chr10	84221909	84222150	31	3.55094	5.19143	3.10604
chr10	84379859	84380529	80	5.49066	10.2949	8.08513
chr10	84501651	84502008	64	4.73099	8.43816	6.41217
chr10	84994032	84994932	10	1.57648	1.9516	1.09621
chr10	85001133	85002619	15	2.49642	3.22034	1.59839
chr10	85006414	85006685	35	3.35185	5.35174	3.54617
chr10	85107958	85108235	37	2.94405	5.22571	3.75289
chr10	85379556	85379814	19	2.21415	3.31297	1.99084
chr10	85391323	85391681	8	1.68086	1.98311	0.85273
chr10	86168699	86168986	11	2.65923	3.05306	1.10902
chr10	86371330	86371742	22	2.86619	4.04387	2.28533
chr10	86409910	86410222	14	2.4972	3.18986	1.47866
chr10	87663752	87664075	21	2.60436	3.55248	2.16129
chr10	87841825	87842439	69	4.76146	8.61879	6.92064
chr10	87922209	87922474	116	7.07296	13.9534	11.6906
chr10	87966417	87966672	81	5.49866	10.1021	8.19398
chr10	88133363	88133832	63	4.70595	8.14343	6.3394
chr10	88186969	88187315	22	2.55727	3.53545	2.22594
chr10	88193341	88194137	8	1.99686	2.21627	0.8646
chr10	88288854	88289778	14	2.54784	3.08657	1.41932
chr10	89194696	89195109	7	1.9518	2.11047	0.73313
chr10	89207636	89208218	21	2.91352	3.91105	2.15167
chr10	89335734	89336147	10	2.50204	2.84233	1.03055
chr10	89711468	89711807	12	2.43207	2.86552	1.22667
chr10	90586515	90587109	19	2.57653	3.42372	1.97646
chr10	90633335	90634974	12	2.38995	2.84212	1.25182
chr10	90643348	90644925	11	2.35589	2.83249	1.15547
chr10	90744948	90745189	22	2.70683	3.76324	2.29422
chr10	92544297	92544607	54	4.61255	7.57476	5.45254
chr10	92623496	92624240	28	3.00215	4.3865	2.81732
chr10	92735973	92736319	12	2.72482	3.49288	1.29737
chr10	92741706	92742207	12	2.51575	2.97487	1.20785
chr10	92915767	92916285	16	2.62511	3.34825	1.64114
chr10	93052095	93052583	26	3.06929	4.52925	2.67852
chr10	93296558	93296828	6	1.62925	1.76543	0.61938
chr10	93352107	93352464	8	1.96916	2.27657	0.86582
chr10	93497716	93499152	25	2.98025	4.27443	2.56787
chr10	93610598	93610912	32	3.74262	5.38394	3.21215
chr10	93795628	93795872	21	2.82139	3.85229	2.194
chr10	93994279	93994601	59	4.80526	8.10241	5.93552
chr10	94388663	94388904	79	5.25747	9.90112	7.96821
chr10	94407213	94407857	156	9.52836	18.9776	15.6285
chr10	94522430	94522818	102	6.43667	12.5345	10.2792
chr10	94786353	94787170	25	2.96447	4.26098	2.55355
chr10	94846241	94846482	6	1.94433	2.09062	0.68427
chr10	94849011	94849819	23	2.92864	4.00723	2.30535
chr10	94949169	94949492	3	1.22587	1.14982	0.36327
chr10	94964182	94964753	9	2.13153	2.44188	0.98606
chr10	94977406	94978345	31	3.38553	4.88988	3.10974
chr10	95182269	95183157	6	1.74472	1.87319	0.69795
chr10	95353857	95355188	9	2.08212	2.38642	0.96462
chr10	95402732	95402996	8	2.30899	2.55401	0.85707
chr10	96093670	96093916	9	2.00064	2.2701	0.9562
chr10	98724026	98725926	12	2.32582	2.78751	1.25541
chr10	98755743	98756217	19	2.94667	3.82724	1.97249
chr10	99501332	99501662	12	2.64322	3.12199	1.29932
chr10	99949919	99950162	13	2.28914	2.87724	1.37147
chr10	101895756	101895997	10	2.31693	2.65173	1.05055
chr10	104088023	104088264	12	2.37496	2.82025	1.24726
chr10	105236311	105236552	11	2.39662	2.77891	1.13369
chr10	105278013	105278882	19	2.80856	3.68672	1.93529
chr10	107598623	107599781	11	2.18369	2.60845	1.12163
chr10	107723416	107724153	11	2.33824	2.73668	1.1683
chr10	107769213	107770244	11	2.10868	2.6461	1.16872
chr10	110181161	110182185	9	2.07118	2.34619	0.95342
chr10	110252244	110252485	27	2.8539	4.11419	2.72246
chr10	110368281	110368601	47	4.81068	7.22655	4.75911
chr10	110446776	110447324	13	2.5246	3.02446	1.34745
chr10	110451737	110451978	34	3.82386	5.52148	3.48721
chr10	110601545	110602125	67	4.79866	8.53112	6.79032
chr10	110735455	110736047	107	6.56902	12.901	10.7374
chr10	110814999	110815433	34	3.05206	4.83068	3.43987
chr10	110870648	110870969	24	2.606	3.89342	2.40583
chr10	110909833	110910351	6	1.83312	1.96721	0.69629
chr10	111327707	111327974	50	3.95417	6.70568	5.06315
chr10	111409604	111410058	148	7.95062	17.1138	14.8674
chr10	112365626	112365867	24	2.99351	4.17528	2.4628
chr10	113029989	113030499	38	3.31919	5.23668	3.80627
chr10	114335640	114335974	86	5.33522	10.2621	8.60101
chr10	114688147	114688618	61	4.9858	8.29143	6.14482
chr10	114752324	114752813	8	1.9655	2.19796	0.87542
chr10	114821306	114822885	10	2.13805	2.48586	1.07586
chr10	115270365	115270813	90	5.38522	10.8118	9.05806
chr10	115865296	115865642	25	2.49513	3.81111	2.55418
chr10	115900953	115901270	10	2.34151	2.69054	1.046
chr10	115910980	115911352	23	3.29022	4.3399	2.35381
chr10	116018283	116018817	14	2.40035	2.97367	1.44337
chr10	116245622	116246098	7	1.83398	2.04014	0.76032
chr10	116309099	116309340	2	1.05518	0.95899	0.29984
chr10	116471878	116472697	7	1.87572	2.04404	0.72153
chr10	116500271	116500819	7	1.90334	2.08613	0.78826
chr10	116604109	116604388	16	2.82005	3.47121	1.60114
chr10	116661085	116662348	40	3.80509	5.87462	4.00274
chr10	116813147	116814184	10	2.19289	2.55234	1.09911
chr10	116828061	116828302	16	1.90366	2.53894	1.63017
chr10	116848164	116849554	52	4.39839	7.14872	5.22706
chr10	116854462	116855236	11	2.49176	2.89297	1.15123
chr10	116873652	116874059	37	4.07176	5.92468	3.77163
chr10	116932882	116933454	17	2.48868	3.33542	1.74157
chr10	117035761	117036002	36	3.6126	5.39998	3.63217
chr10	117147329	117148181	40	4.14468	6.19137	4.01517
chr10	117164435	117164882	76	5.6034	10.3163	7.60868
chr10	117183366	117183607	37	3.08394	5.32913	3.70063
chr10	117389325	117390489	8	2.04776	2.27087	0.8531
chr10	117575550	117575862	13	2.33606	2.80209	1.30307
chr10	117578501	117578957	15	2.72315	3.32276	1.52528
chr10	118038339	118038952	7	1.94702	2.10268	0.71359
chr10	118305710	118305994	52	4.33535	7.09353	5.26014
chr10	118517799	118518145	48	3.83071	6.39735	4.88838
chr10	118525111	118525660	17	2.75486	3.50593	1.79217
chr10	118676644	118677621	12	2.47494	2.97896	1.27371
chr10	118681175	118681486	17	2.2615	3.28927	1.78713
chr10	119372029	119372683	70	4.64772	8.76713	7.08458
chr10	119548858	119549254	14	2.62917	3.20854	1.49473
chr10	119571748	119572190	13	2.18472	2.68529	1.37921
chr10	119573344	119573706	67	5.10697	8.78412	6.77889
chr10	119645645	119646049	18	2.67984	3.48998	1.85018
chr10	119834019	119834434	107	5.73399	12.905	10.7916
chr10	120294568	120295163	306	10.6207	33.1602	30.6654
chr10	120298845	120299187	442	13.6336	47.0777	44.211
chr10	120415236	120417035	523	13.9148	55.9003	52.3464
chr10	120453449	120453690	305	6.49852	33.0036	30.5244
chr10	120912891	120913346	389	8.42295	42.2315	38.9312
chr10	120942183	120942822	238	5.48449	26.064	23.8646
chr10	121063336	121063731	312	7.60341	34.0686	31.2548
chr10	121094150	121094681	235	6.14496	25.5709	23.5221
chr10	121156130	121156371	128	3.72017	14.0673	12.8312
chr10	121176662	121177184	225	6.9538	24.4854	22.5202
chr10	122407551	122407792	152	7.58145	17.6711	15.2085
chr10	122422578	122424116	76	4.91765	9.56987	7.62283
chr10	122513023	122513630	34	3.52845	5.24923	3.40422
chr10	122633579	122634206	14	2.37932	2.94173	1.46392
chr10	125162636	125163309	22	3.05898	4.0327	2.21801
chr10	126365342	126365865	49	3.91605	6.63936	4.90536
chr10	126372104	126372365	83	4.94847	9.89886	8.31419
chr10	126467765	126468006	106	6.56821	12.9188	10.6643
chr10	126478801	126479275	39	3.7497	5.94309	3.98468
chr10	126500162	126501066	12	2.2516	2.73634	1.27909
chr10	126557980	126558367	8	2.11835	2.36087	0.88085
chr10	126601896	126602324	9	2.23386	2.55593	0.96183
chr10	126632548	126633146	48	3.80202	6.83231	4.85548
chr10	126648394	126648637	92	5.19243	11.6434	9.28953
chr10	126703204	126703593	149	6.27503	17.4939	14.975
chr10	126727263	126727666	101	4.10289	11.6463	10.1307
chr10	127114137	127114460	125	4.62733	13.9124	12.5884
chr10	127187477	127187861	283	10.935	30.577	28.331
chr10	127452101	127452451	235	9.63562	25.724	23.5198
chr10	127472230	127473372	125	6.37198	14.441	12.5032
chr10	127495514	127496927	42	3.87368	6.00177	4.22021
chr10	127520147	127520994	62	4.67491	8.23997	6.22531
chr10	127533752	127534874	55	4.23746	7.48342	5.57578
chr10	127608291	127608532	10	2.08015	2.50115	1.00325
chr10	127641976	127642424	98	6.07614	11.8067	9.81398
chr10	127648562	127649168	157	7.86179	17.9814	15.7551
chr10	127658960	127659201	56	4.14897	7.74484	5.66637
chr10	127668813	127669383	47	3.79979	6.75411	4.7317
chr10	127739959	127740943	52	4.48805	7.26244	5.21535
chr10	127759652	127759931	84	5.99927	10.6808	8.44372
chr10	127805913	127806234	43	3.81898	6.05205	4.36832
chr10	127848677	127849332	13	2.68614	3.23384	1.36788
chr10	127878778	127879173	8	2.20281	2.42143	0.81501
chr10	127896218	127896868	17	2.78445	3.53251	1.7937
chr10	127930610	127931315	21	2.81692	3.78361	2.19827
chr10	127984758	127986307	57	4.23483	7.52112	5.78903
chr10	128002334	128003202	186	8.87117	20.8855	18.6828
chr10	128063138	128064291	73	4.98468	9.23972	7.35281
chr10	128106101	128106358	132	6.94109	15.0345	13.2817
chr10	128184744	128185847	132	7.19919	15.2365	13.2827
chr10	128258769	128259312	16	2.62073	3.26733	1.61707
chr10	129623106	129623440	12	2.38693	2.82699	1.24193
chr11	3003844	3004602	10	1.41909	2.52224	1.02693
chr11	3023373	3024376	23	2.00201	3.85888	2.34493
chr11	3034588	3036016	38	2.04614	5.53019	3.88835
chr11	3092854	3094164	12	1.37331	2.83062	1.24087
chr11	3166001	3166550	34	1.62375	5.2625	3.42761
chr11	3188642	3191609	65	1.95112	8.43952	6.5524
chr11	3192748	3193162	86	2.35861	11.0051	8.67029
chr11	3232377	3232649	42	1.50116	5.70952	4.28384
chr11	3247146	3247502	65	1.94497	8.46354	6.52463
chr11	3248566	3249066	72	1.86433	8.93428	7.26569
chr11	3308866	3309223	95	2.15179	11.3915	9.52148
chr11	3352365	3352661	111	2.44829	13.3341	11.147
chr11	3435554	3436289	81	1.95633	9.84329	8.14143
chr11	3547880	3549717	47	1.49445	6.17788	4.76853
chr11	3718349	3718800	44	1.59328	6.08945	4.40645
chr11	3813870	3814487	42	1.68176	6.21418	4.27642
chr11	3863902	3864279	35	1.5803	5.4071	3.51909
chr11	3898039	3898969	31	1.49266	4.94565	3.1373
chr11	3931297	3931837	48	2.13089	7.79094	4.86363
chr11	3994812	3997136	17	1.27932	3.3907	1.79175
chr11	4022979	4023457	10	1.38904	2.55725	1.03743
chr11	4060208	4060846	30	2.90072	4.71927	3.08619
chr11	4086474	4087066	33	3.09446	5.10385	3.36029
chr11	4117814	4118738	29	3.57712	5.34324	2.90008
chr11	4345478	4345917	31	2.81026	4.53909	3.10048
chr11	4494150	4494976	49	4.18694	7.05864	4.97143
chr11	4604010	4604741	41	3.24343	5.97858	4.11698
chr11	4722312	4722923	9	2.01499	2.32102	0.99646
chr11	4773976	4774352	14	2.57011	3.11559	1.43044
chr11	4846894	4847985	13	2.56446	3.08025	1.3499
chr11	4964802	4965337	11	2.46572	2.8472	1.11939
chr11	4998425	5000578	16	2.58105	3.28374	1.61364
chr11	5344126	5345399	17	2.43428	3.24249	1.76757
chr11	5395287	5395662	22	2.65229	4.11172	2.28413
chr11	5416634	5416919	35	2.9832	5.46414	3.55063
chr11	5420625	5421414	18	2.58511	3.65794	1.89972
chr11	5441824	5442489	78	5.04116	9.67108	7.84089
chr11	5607396	5607812	14	2.46998	3.06207	1.44796
chr11	5615659	5615927	9	1.995	2.30038	0.92557
chr11	5640943	5641367	18	2.57113	3.45499	1.84201
chr11	5662007	5662485	12	2.26581	2.7417	1.23806
chr11	5688104	5689026	13	2.21803	2.68943	1.31227
chr11	5737687	5738187	13	2.93048	3.46626	1.36362
chr11	5801925	5802358	30	3.47993	4.93084	3.04816
chr11	5857208	5857588	68	4.262	8.15317	6.84348
chr11	6099985	6100611	156	7.80638	17.7342	15.6823
chr11	6167496	6168026	71	4.81347	9.16835	7.1328
chr11	6174628	6174987	114	6.44525	13.3713	11.4039
chr11	6191989	6192833	41	3.40221	5.61043	4.15194
chr11	6288993	6289661	55	4.44227	7.45091	5.58484
chr11	6315453	6316819	61	4.55585	8.05328	6.1709
chr11	6375608	6376243	8	2.01014	2.24105	0.84382
chr11	6423522	6423983	2	1.07303	0.96019	0.26822
chr11	6427912	6428992	13	2.15934	2.8019	1.31928
chr11	6446258	6447014	56	3.8474	7.53354	5.61537
chr11	6525717	6526685	52	3.68143	6.9878	5.23366
chr11	6528728	6528999	85	4.07342	10.5401	8.58466
chr11	6793893	6795473	53	3.34309	7.08409	5.39717
chr11	7113255	7113515	43	3.78922	6.12588	4.35441
chr11	7323460	7324410	24	3.06169	4.25918	2.46778
chr11	7344473	7344743	11	2.60582	3.01069	1.13834
chr11	8168792	8169038	12	2.56751	3.0231	1.24602
chr11	8366274	8366999	8	1.92305	2.21493	0.80913
chr11	8468876	8469626	40	3.62877	5.99976	4.02899
chr11	8474932	8476392	34	3.40981	5.3139	3.48022
chr11	8505064	8505399	13	2.22811	3.04323	1.36084
chr11	8529685	8530283	52	4.00852	7.31645	5.2275
chr11	8534273	8536008	25	2.7959	4.25267	2.55253
chr11	8910908	8911355	14	2.52878	3.10832	1.48628
chr11	9017230	9019042	24	2.96845	4.15054	2.49007
chr11	9792872	9793142	49	4.26995	6.9297	4.92048
chr11	11047909	11048365	147	7.68695	16.9414	14.7939
chr11	11362061	11362853	166	7.18232	19.0106	16.6183
chr11	11585392	11586230	61	3.85871	8.28721	6.17901
chr11	11708651	11709418	28	2.80359	4.63401	2.83124
chr11	11720353	11722685	29	3.25143	4.71169	2.96668
chr11	11848295	11848536	12	2.72771	3.20362	1.23509
chr11	11925676	11926447	21	2.7891	3.82945	2.12511
chr11	12432086	12432385	83	5.20496	10.2861	8.32509
chr11	16425099	16425394	28	3.1842	4.66944	2.86409
chr11	16491369	16492216	10	1.81625	2.57695	1.03284
chr11	17059285	17060330	27	2.83709	4.79498	2.70587
chr11	17111362	17112132	11	2.17215	2.70306	1.1517
chr11	17157475	17158181	27	2.88262	4.56957	2.76564
chr11	17853104	17854060	19	2.71005	3.60054	1.95057
chr11	18914466	18914884	22	2.09966	3.4402	2.24243
chr11	18918710	18919176	44	3.1555	5.8804	4.46442
chr11	18927200	18927485	67	4.10469	8.50195	6.74702
chr11	19471475	19472121	100	5.18218	12.0624	10.0629
chr11	19716287	19716782	104	4.93793	12.2398	10.454
chr11	19729474	19729881	161	7.31677	18.7795	16.1104
chr11	19819540	19820344	40	2.81005	5.29181	4.02439
chr11	19823943	19826515	65	3.93346	8.49885	6.57576
chr11	20012363	20013211	21	2.46768	3.69877	2.17446
chr11	20037850	20040965	17	2.60358	3.50957	1.75427
chr11	20064340	20065130	11	2.17079	2.71193	1.16402
chr11	20100814	20101869	23	2.86611	4.00181	2.3457
chr11	20131496	20131951	9	2.24558	2.63064	0.9829
chr11	20142638	20142960	48	4.34948	6.98073	4.80515
chr11	20148864	20149711	16	2.62852	3.4174	1.6738
chr11	20231626	20233520	95	5.13361	11.5728	9.57232
chr11	20304260	20304701	197	7.67374	21.8045	19.7285
chr11	20368406	20368908	294	9.92036	32.166	29.4193
chr11	20532238	20532479	313	10.5358	33.7363	31.3071
chr11	20641247	20642066	257	8.79754	27.9865	25.7636
chr11	20684633	20685536	47	3.75718	6.80431	4.75093
chr11	20730571	20731249	29	2.89301	4.42513	2.92899
chr11	20773315	20773727	101	5.86902	12.6522	10.1769
chr11	21122885	21123905	29	2.70982	4.45975	2.99711
chr11	21138359	21139623	25	3.07163	4.29346	2.55379
chr11	21270537	21270837	17	2.54603	3.29364	1.77688
chr11	21472109	21472369	14	2.26821	3.04717	1.49877
chr11	21534351	21534682	40	3.36055	5.7416	4.07489
chr11	22186790	22187105	31	3.75021	5.37796	3.19405
chr11	22361833	22362090	12	2.17494	2.72435	1.23233
chr11	22412125	22413105	94	5.37194	11.4534	9.49506
chr11	22528856	22530046	111	6.60879	13.5382	11.1905
chr11	22610603	22611181	35	3.27936	5.24479	3.54739
chr11	22699029	22699339	9	2.29609	2.65486	0.99075
chr11	22759555	22760603	12	2.4482	3.04667	1.29838
chr11	22872543	22873405	35	3.06275	5.53276	3.55059
chr11	22881956	22882474	15	2.14467	2.91771	1.56384
chr11	22890309	22892122	141	7.49051	16.3923	14.1075
chr11	22907561	22908609	64	3.92399	8.18556	6.47061
chr11	22967520	22967973	161	7.36112	18.5106	16.1751
chr11	23155220	23157924	139	6.54893	15.9599	13.92
chr11	23205602	23207274	82	5.01352	10.0357	8.27371
chr11	23397632	23397902	191	8.76606	21.213	19.1505
chr11	23565435	23566603	218	10.2657	24.3126	21.8394
chr11	23701835	23702838	112	6.84686	13.6676	11.26
chr11	23794776	23795489	21	2.74036	3.87856	2.13707
chr11	23803932	23804362	15	2.15874	2.89985	1.56633
chr11	23949176	23949661	16	2.72933	3.41137	1.67318
chr11	23981224	23982078	7	1.56034	1.71829	0.78277
chr11	24086359	24086601	10	2.50807	2.88544	1.05027
chr11	25999089	25999359	10	2.02015	2.42638	1.04404
chr11	26110033	26110782	15	2.35751	3.18068	1.5409
chr11	26286989	26287537	11	2.05147	2.5092	1.15564
chr11	26326413	26326654	34	3.47683	5.28828	3.42767
chr11	26825965	26826226	16	2.65014	3.39218	1.60889
chr11	28265332	28265708	9	2.07209	2.45217	0.96242
chr11	29030488	29031182	11	1.95602	2.67893	1.1743
chr11	29072646	29073438	18	2.44702	3.54619	1.86378
chr11	29147039	29147692	21	2.66449	3.66531	2.12481
chr11	29273512	29273790	8	2.08208	2.33478	0.82372
chr11	29414808	29415406	11	2.05067	2.62882	1.13121
chr11	29426103	29426535	15	2.34689	2.98112	1.5498
chr11	29447309	29448018	115	6.68593	13.5813	11.5212
chr11	29536416	29537035	36	3.48025	5.44767	3.6231
chr11	29592986	29594415	10	1.75446	2.19737	1.03038
chr11	29725277	29725524	13	2.6203	3.39143	1.39671
chr11	29926025	29926370	8	1.79273	2.19108	0.85577
chr11	30097706	30098710	10	1.86271	2.44166	1.0406
chr11	30549085	30549588	25	2.99727	4.42207	2.56758
chr11	30649303	30650529	10	1.98285	2.60882	1.02279
chr11	30935401	30935879	16	1.84085	2.77825	1.6226
chr11	31269482	31271779	11	2.07219	2.58829	1.15592
chr11	31571531	31572158	10	2.09153	2.52882	1.05559
chr11	31576739	31577050	27	3.00851	4.609	2.71246
chr11	31769965	31770992	25	2.72735	4.20218	2.54868
chr11	31865587	31866227	12	2.23736	2.94142	1.26204
chr11	32105111	32105878	17	2.22895	3.0692	1.7475
chr11	32121615	32122767	8	2.10111	2.33192	0.85588
chr11	32167097	32167648	13	2.21475	2.71382	1.36922
chr11	32247801	32248245	6	1.71665	1.84147	0.66788
chr11	32354333	32355412	7	2.05924	2.32108	0.77997
chr11	32514628	32514874	13	2.36741	3.01524	1.38412
chr11	32542518	32543283	22	2.72983	3.9008	2.24024
chr11	33018637	33019058	8	1.88742	2.12248	0.81068
chr11	33062456	33063851	12	2.09326	2.77559	1.24915
chr11	33121671	33122097	9	2.08275	2.4681	0.99068
chr11	33328277	33328561	10	2.25058	2.64727	1.02122
chr11	33412733	33413692	14	2.44099	3.13016	1.44966
chr11	33427377	33427805	16	2.31295	3.11722	1.60827
chr11	33433197	33433551	27	3.00207	4.65066	2.79205
chr11	33437356	33438271	59	3.71702	7.64835	5.9727
chr11	33444262	33444503	179	7.12882	20.2342	17.9523
chr11	33832508	33832846	57	4.02092	7.65876	5.74281
chr11	34663126	34663483	11	1.99092	2.37869	1.10393
chr11	34965240	34965579	31	2.94226	4.53979	3.11879
chr11	35200991	35201639	9	1.87892	2.23255	0.93675
chr11	35521215	35521503	34	3.55646	5.36171	3.44901
chr11	35582688	35583620	12	2.26862	2.71224	1.23569
chr11	35611073	35611543	10	2.80428	3.22414	1.09733
chr11	35740199	35740541	9	1.9911	2.28145	0.99229
chr11	35747164	35747947	39	3.63761	5.73491	3.97643
chr11	36992028	36992299	82	5.32476	9.9895	8.23669
chr11	37542979	37543426	17	2.53277	3.24788	1.73687
chr11	37565796	37566089	8	2.17275	2.40096	0.83973
chr11	40062906	40063147	19	2.80217	3.62256	1.90223
chr11	40508230	40508752	21	2.78776	3.80937	2.19038
chr11	40568814	40569823	68	5.02827	8.88761	6.85288
chr11	43330160	43330502	106	6.10187	12.5525	10.6517
chr11	43398908	43400031	117	7.0502	14.146	11.7909
chr11	43407564	43408526	28	3.78584	5.24617	2.85993
chr11	43495436	43495872	22	2.78394	3.83609	2.20209
chr11	43560968	43561598	23	2.58573	3.74812	2.36298
chr11	44159010	44159521	11	2.30688	2.74068	1.1542
chr11	44331981	44332690	19	2.54934	3.6544	1.92816
chr11	45757814	45758577	13	2.30163	2.9704	1.35177
chr11	45768727	45769146	37	2.97886	5.35877	3.74894
chr11	45793321	45794136	36	3.11024	5.52095	3.6727
chr11	45928233	45928655	28	2.90761	4.78015	2.86792
chr11	46031448	46032399	21	2.38541	3.76342	2.19448
chr11	46125169	46125889	54	4.12015	7.58888	5.48932
chr11	48535931	48536355	293	10.4754	31.9166	29.3401
chr11	48613818	48614612	289	10.937	31.8457	28.9268
chr11	48629936	48631024	136	6.48351	15.8689	13.6072
chr11	48639694	48640199	21	2.31617	3.52545	2.1527
chr11	48651336	48651737	7	1.84279	2.10999	0.73574
chr11	48669708	48670498	11	2.38229	2.79686	1.10041
chr11	48982656	48983039	18	2.36331	3.24198	1.81018
chr11	49016245	49017662	35	3.28037	5.21666	3.56583
chr11	49464302	49464609	27	2.74718	4.08311	2.7985
chr11	49472804	49473239	33	3.69597	5.32719	3.33049
chr11	49525732	49526629	13	2.17888	2.67128	1.34362
chr11	49771245	49771579	28	2.78167	4.18181	2.87167
chr11	49988197	49988827	9	2.31499	2.68924	0.99289
chr11	50023950	50024877	31	2.9196	4.70673	3.11919
chr11	50037881	50039138	39	2.69507	5.08496	3.90131
chr11	50050121	50050878	111	5.54665	12.9782	11.1347
chr11	50065797	50066184	119	5.72975	13.6848	11.9086
chr11	50104960	50106416	61	4.50759	8.23322	6.14278
chr11	50184833	50185150	60	4.65644	8.01266	6.01778
chr11	50190520	50191917	14	2.3827	2.98206	1.43012
chr11	50235593	50235921	9	1.49641	1.79111	0.913
chr11	50244007	50244838	20	2.71155	3.78545	2.02972
chr11	50274753	50275269	9	2.20906	2.5471	0.95646
chr11	50727065	50727306	7	1.52479	1.67343	0.74069
chr11	50729290	50729647	25	2.77446	3.94451	2.5699
chr11	50731216	50731582	27	3.12366	4.44369	2.77919
chr11	51033748	51034417	12	2.02045	2.47085	1.247
chr11	51076156	51077040	71	4.55682	8.82669	7.11381
chr11	51353047	51353357	197	9.00507	22.7144	19.722
chr11	51367050	51368435	133	6.11586	15.3587	13.3764
chr11	51397886	51398528	199	8.0475	22.1043	19.9811
chr11	51419577	51420405	322	12.4712	34.7053	32.2119
chr11	51433275	51433570	478	17.5937	51.1528	47.8382
chr11	51449217	51449458	418	15.8168	44.9307	41.8984
chr11	51501924	51503032	123	6.04124	14.2496	12.3294
chr11	51516985	51517231	40	3.18418	5.83076	4.07952
chr11	51569471	51570589	191	6.64013	21.314	19.188
chr11	51576995	51577433	328	8.5367	35.445	32.8762
chr11	51670852	51671952	184	4.48748	20.2696	18.4132
chr11	51710807	51711090	127	3.4929	14.4165	12.7605
chr11	51751856	51752160	130	3.88941	15.215	13.0666
chr11	51781015	51781457	57	2.65294	7.42781	5.73496
chr11	51813536	51813943	11	1.98186	2.46044	1.14367
chr11	51817070	51818012	12	2.31341	2.75248	1.21202
chr11	51912000	51913271	22	2.63408	3.86631	2.24446
chr11	52045047	52045372	77	5.24203	10.2094	7.75148
chr11	52075321	52075593	40	3.66244	6.02509	4.05523
chr11	52153648	52154805	14	2.2512	2.94586	1.41965
chr11	52160146	52160612	58	4.31623	8.00883	5.86599
chr11	52173322	52174800	21	2.24623	3.71658	2.14196
chr11	52187442	52188117	14	2.12758	3.0358	1.43534
chr11	52209778	52210412	35	2.82125	5.29699	3.58069
chr11	52325367	52325703	43	2.54341	5.73298	4.31226
chr11	52561486	52561775	41	2.69263	5.5779	4.14983
chr11	52577208	52578126	64	4.64227	8.75288	6.49442
chr11	52845799	52846149	48	3.96025	6.71583	4.80166
chr11	53113364	53115553	16	2.33255	3.13489	1.65591
chr11	53137903	53138496	15	2.5606	3.17944	1.53792
chr11	53164364	53165347	16	2.76438	3.51079	1.60137
chr11	53243950	53244432	20	2.84697	4.03916	2.06734
chr11	53292046	53293505	17	2.16402	3.12047	1.79625
chr11	53332932	53334273	81	5.01418	10.1597	8.16455
chr11	53380706	53381005	162	7.58997	18.4566	16.2251
chr11	53520314	53521090	141	6.50301	15.9853	14.1201
chr11	53545009	53545302	168	7.9295	19.2405	16.8606
chr11	53550635	53550876	132	7.10554	15.7469	13.208
chr11	53616417	53617052	12	2.23695	2.86145	1.28242
chr11	53705130	53705825	10	2.21927	2.59234	1.08363
chr11	53714526	53714890	16	2.95388	3.67305	1.69552
chr11	53744979	53745441	14	2.10379	2.857	1.45576
chr11	53792813	53793749	17	2.30458	3.26273	1.79194
chr11	53953435	53954275	24	2.40934	3.76409	2.41009
chr11	54192811	54193062	18	2.29861	3.27747	1.82681
chr11	54201850	54202091	11	2.10185	2.61647	1.14653
chr11	54251741	54252137	6	1.62207	1.80744	0.66723
chr11	54335861	54336625	8	1.79259	2.11619	0.8379
chr11	54600873	54601599	17	2.36971	3.23316	1.72349
chr11	54609980	54610764	28	2.7123	4.26885	2.8655
chr11	54630059	54630342	62	4.52949	8.27856	6.22861
chr11	54658126	54659126	93	5.74946	11.5879	9.33627
chr11	54673777	54674566	155	7.6443	17.9093	15.5587
chr11	54679837	54680548	34	3.15231	5.12992	3.46187
chr11	54716228	54716568	22	2.65595	3.83727	2.23678
chr11	54942828	54943070	57	3.46527	7.03789	5.75033
chr11	54972320	54972819	31	3.04535	4.83885	3.1609
chr11	55012319	55012716	34	4.35508	6.02468	3.43793
chr11	55114193	55114467	4	1.52262	1.53408	0.49546
chr11	55137469	55137898	11	2.37786	2.85499	1.19182
chr11	55201451	55201806	13	2.50525	3.05556	1.34449
chr11	55282323	55283392	10	2.24311	2.63663	1.03082
chr11	56958041	56958312	23	2.47575	3.65325	2.30644
chr11	57331771	57332312	16	1.75322	2.57828	1.6741
chr11	57412737	57413452	18	2.7081	3.74931	1.87746
chr11	57532523	57533506	24	2.99381	4.14544	2.48588
chr11	57731716	57732184	69	3.9897	8.88041	6.97466
chr11	57748002	57748391	132	5.53465	15.0777	13.2857
chr11	57821930	57823580	255	9.98773	27.8755	25.527
chr11	57917417	57917922	164	6.61071	18.539	16.4491
chr11	57984965	57985434	27	2.52215	4.25898	2.74134
chr11	58027866	58028185	40	3.2971	5.78211	4.01202
chr11	58136871	58137332	8	1.75099	2.09757	0.87295
chr11	58142673	58144455	94	5.6506	11.4088	9.47775
chr11	58416281	58416564	120	5.98578	13.5264	12.0735
chr11	58680427	58680934	61	4.54346	8.08187	6.10176
chr11	58717419	58717925	103	5.31768	12.4777	10.3309
chr11	58751953	58752216	134	5.65931	15.2308	13.4109
chr11	58775509	58775922	154	6.37177	17.4386	15.4399
chr11	58791519	58792124	204	8.05081	22.8631	20.4429
chr11	58976931	58977628	125	5.34571	14.2637	12.5238
chr11	59005194	59005714	120	5.8992	14.3284	12.0781
chr11	59021537	59022273	34	2.89728	5.04437	3.47483
chr11	59041328	59042067	55	4.34524	7.46698	5.54221
chr11	59119555	59120777	20	2.97903	4.0671	2.06423
chr11	59188857	59189295	17	2.31497	3.29683	1.77879
chr11	59263305	59263734	71	4.71274	9.24573	7.18835
chr11	59285386	59285701	57	3.70163	7.30555	5.77593
chr11	59319011	59320085	103	5.5426	12.3235	10.3125
chr11	59351891	59352337	61	4.14867	7.9782	6.10196
chr11	59427125	59427958	19	2.67956	3.70957	1.93691
chr11	59600860	59601230	22	2.87345	4.09517	2.24431
chr11	59623170	59623627	10	2.14452	2.5897	1.00652
chr11	59627738	59628054	12	2.26373	2.83874	1.21724
chr11	59652647	59653773	41	3.37682	6.03751	4.1914
chr11	59659725	59660019	53	4.86454	7.74027	5.36962
chr11	59661594	59662099	78	5.89944	10.301	7.84537
chr11	59721815	59722343	31	3.06704	4.62236	3.15093
chr11	59761560	59761963	17	2.56813	3.40993	1.74403
chr11	59818135	59819145	8	1.97436	2.28391	0.82155
chr11	59859778	59860195	11	2.09392	2.51259	1.10844
chr11	59920414	59920662	16	2.70115	3.50331	1.65779
chr11	59927826	59928976	15	2.51311	3.26009	1.5541
chr11	59953477	59954093	15	2.67063	3.37805	1.57834
chr11	59990268	59990702	19	2.85065	3.79465	1.99801
chr11	60023757	60024970	16	2.39639	3.10129	1.62513
chr11	60033791	60034114	17	2.96319	3.75168	1.71476
chr11	60179806	60180531	7	1.59786	2.01468	0.79477
chr11	60230088	60230741	61	3.55176	7.85181	6.11505
chr11	60267846	60268153	64	3.62674	8.08618	6.4165
chr11	60350602	60352107	13	2.20906	2.98765	1.39112
chr11	60512016	60513535	34	3.05219	5.63795	3.46653
chr11	60540359	60540600	11	2.00381	2.57631	1.19525
chr11	60589999	60591379	14	2.44264	3.07458	1.4976
chr11	60644120	60644577	76	5.58631	9.77572	7.63618
chr11	60691809	60692667	24	2.81416	4.03986	2.42392
chr11	60700174	60700787	63	4.81892	8.71389	6.38284
chr11	60727032	60727376	52	3.52757	7.24652	5.29302
chr11	60736252	60736958	100	4.73248	12.2099	10.0543
chr11	60745189	60746010	91	4.08497	10.8957	9.1049
chr11	60934370	60934760	235	7.98751	26.1277	23.5515
chr11	60987998	60989244	312	10.4166	33.715	31.2912
chr11	61003613	61003974	488	14.9888	52.057	48.8687
chr11	61080232	61080799	487	15.2823	51.8955	48.7273
chr11	61107362	61107739	336	11.7896	36.1335	33.6852
chr11	61150327	61150814	248	9.99807	27.1208	24.8146
chr11	61177520	61177761	98	5.13646	11.4761	9.85098
chr11	61221562	61222059	69	4.78923	8.82936	6.90557
chr11	61262951	61263494	12	2.05075	2.55831	1.24293
chr11	61301498	61301988	62	4.28829	7.97985	6.24698
chr11	61306673	61308474	86	5.25297	10.5849	8.6841
chr11	61318110	61318887	180	8.60506	20.4726	18.0443
chr11	61392268	61393341	66	3.71972	8.41736	6.68168
chr11	61433286	61434044	8	2.19316	2.39902	0.80537
chr11	61575202	61575688	11	2.2826	2.71366	1.1271
chr11	61667993	61669044	24	3.05369	4.14726	2.41925
chr11	61743260	61743915	15	2.51664	3.14372	1.53103
chr11	61853627	61853868	25	3.09542	4.29331	2.53303
chr11	61863554	61864036	13	2.45944	3.00285	1.38717
chr11	62020885	62021360	28	3.33236	4.68137	2.80238
chr11	62061826	62063180	13	2.13819	2.67615	1.36787
chr11	62094194	62095081	10	1.88743	2.22816	1.02106
chr11	62243666	62244376	35	3.6531	5.4513	3.50714
chr11	62269932	62272655	70	4.44778	8.87637	7.08478
chr11	62308101	62308693	61	4.82734	8.23362	6.17567
chr11	62324113	62326231	33	3.07043	4.90023	3.39643
chr11	62363603	62365235	21	2.4002	3.64758	2.19624
chr11	62373967	62374350	12	2.1557	2.76812	1.20372
chr11	62416144	62420874	17	2.43571	3.43763	1.7725
chr11	62545033	62545429	15	2.20058	3.06188	1.52154
chr11	62602353	62603060	37	3.02792	5.61379	3.79169
chr11	62659039	62660634	110	4.13971	13.4448	11.0625
chr11	62692923	62693281	198	6.58989	22.5161	19.8491
chr11	62734848	62735234	291	9.91305	32.7879	29.153
chr11	63084741	63085132	94	4.50552	11.1732	9.4257
chr11	63163591	63163927	106	5.2261	12.826	10.6103
chr11	63460279	63460601	33	2.76196	4.99336	3.34343
chr11	63732874	63733158	23	2.61654	4.15623	2.35879
chr11	63734204	63736019	6	1.57848	1.87901	0.66608
chr11	63892598	63893189	15	2.23556	3.12474	1.57664
chr11	63903071	63903394	7	2.01312	2.2111	0.79001
chr11	64112479	64112762	16	2.54988	3.40055	1.69902
chr11	64282172	64282560	11	2.24369	2.61212	1.10941
chr11	64792370	64792642	20	3.32888	4.24506	2.09483
chr11	64971779	64972314	11	2.39389	2.8042	1.17311
chr11	65526335	65526797	9	1.98245	2.26569	0.90492
chr11	65601194	65601854	13	2.39111	2.94991	1.33192
chr11	66273935	66274338	17	2.53556	3.77451	1.78581
chr11	66831296	66832010	23	2.88057	4.27665	2.30974
chr11	66838566	66838915	16	2.55354	3.25595	1.66533
chr11	66865900	66866464	17	2.71548	3.43244	1.70224
chr11	66898886	66899127	29	3.41034	4.81653	2.99581
chr11	67395986	67396227	8	2.35765	2.61668	0.88202
chr11	68171579	68171878	9	2.32424	2.60278	0.90349
chr11	68217722	68218052	37	3.38819	5.39885	3.72902
chr11	68505011	68505692	12	2.89549	3.36666	1.24306
chr11	68564521	68564808	16	2.60575	3.29051	1.68675
chr11	68604234	68604875	34	3.18252	4.89328	3.4636
chr11	68666313	68666778	21	2.72838	3.89917	2.195
chr11	68714862	68715558	12	2.37519	2.82115	1.23878
chr11	68718766	68719358	12	2.60295	3.04627	1.23136
chr11	68829403	68830630	12	2.39215	2.91402	1.27219
chr11	68849263	68849768	10	2.36888	2.7748	1.03101
chr11	68853935	68854788	11	2.34638	2.79142	1.12291
chr11	68873284	68873719	29	3.59714	5.05733	2.93334
chr11	68883998	68884504	8	1.98494	2.21614	0.87459
chr11	68901754	68902681	20	2.79011	3.68672	2.02793
chr11	69064675	69065221	22	2.76798	3.95767	2.22483
chr11	69139954	69140195	123	6.63524	14.9359	12.3491
chr11	69153964	69154335	64	4.0825	8.2326	6.43351
chr11	69175053	69175294	20	2.17741	3.32483	2.08306
chr11	69187034	69187350	15	2.49979	3.34899	1.5635
chr11	69208051	69209658	25	3.11973	4.5325	2.54818
chr11	69224807	69225333	57	4.64086	7.66028	5.70282
chr11	69230944	69231198	115	6.87369	13.6584	11.5833
chr11	69256954	69257208	129	6.73333	14.5989	12.9067
chr11	69266136	69267050	179	9.32417	20.2789	17.9062
chr11	69313143	69314331	110	6.23817	12.7896	11.0509
chr11	69316136	69316385	82	5.5265	10.1285	8.20442
chr11	69359912	69360193	7	1.37613	1.51245	0.76017
chr11	69376229	69376618	12	2.31386	2.77364	1.20791
chr11	69392839	69395623	23	2.75476	4.04394	2.37056
chr11	69398701	69400288	10	2.12595	2.50514	1.03979
chr11	69446349	69446590	42	4.11639	6.29277	4.29638
chr11	69475665	69476800	84	4.94325	10.4547	8.48854
chr11	69479415	69479968	365	13.6649	39.3506	36.564
chr11	69484545	69486344	134	6.46656	15.5357	13.4984
chr11	69495261	69495614	8	1.93172	2.17278	0.89774
chr11	69517064	69518805	14	2.2429	2.98716	1.4099
chr11	69528454	69529350	10	2.32343	2.7019	1.02005
chr11	69571621	69573210	16	2.42628	3.22073	1.60574
chr11	69650698	69652244	17	2.36978	3.12837	1.75929
chr11	69694219	69695311	15	2.08527	2.73318	1.55771
chr11	69714679	69715698	51	4.09562	6.86785	5.10022
chr11	69727331	69727971	16	2.47209	3.18545	1.67174
chr11	69734363	69735681	16	2.42354	3.22027	1.6803
chr11	69779299	69780095	40	3.64126	5.9814	4.0773
chr11	69793539	69794748	29	2.90112	4.53409	2.9182
chr11	69808830	69810909	10	2.09932	2.59176	1.07871
chr11	69819083	69819659	10	2.17456	2.51527	1.07857
chr11	69910887	69911431	12	2.31416	3.07465	1.26854
chr11	70039790	70040121	24	2.86089	4.31327	2.49746
chr11	70047529	70047921	39	3.0853	5.45454	3.98026
chr11	70050878	70051631	70	4.7117	9.14536	7.01952
chr11	70152734	70153337	61	4.21826	8.06716	6.1424
chr11	70222337	70223906	31	2.91574	4.75784	3.19085
chr11	70265275	70265626	16	2.36879	3.01859	1.60212
chr11	70278761	70280525	13	2.3116	2.81224	1.32839
chr11	70336718	70337035	16	2.39199	3.25209	1.67019
chr11	70338632	70340326	117	5.93276	13.7519	11.7471
chr11	70430865	70431521	13	1.84346	2.49951	1.39025
chr11	70460224	70461042	13	2.46492	3.12869	1.34836
chr11	70467395	70469813	17	2.73851	3.57273	1.74978
chr11	70481610	70483551	36	2.86477	5.37755	3.60866
chr11	70501194	70501526	42	3.0389	5.94692	4.27686
chr11	70577696	70578221	39	3.0156	5.46377	3.95916
chr11	70658239	70658599	51	4.19566	7.50655	5.17352
chr11	70783118	70784237	19	2.6672	3.64017	1.99917
chr11	70795744	70796542	14	2.97598	3.56085	1.41986
chr11	70817687	70818017	20	3.21137	4.12504	2.09773
chr11	70832486	70832960	21	2.78219	3.77429	2.14094
chr11	71864510	71864826	140	7.59475	16.2565	14.0286
chr11	72020339	72021187	38	3.55446	5.62791	3.81359
chr11	72028275	72029035	17	2.70999	3.73281	1.73715
chr11	72100587	72101487	70	4.24699	8.77312	7.02316
chr11	72127718	72128021	126	6.28019	14.7511	12.6368
chr11	72233979	72234383	207	8.46337	23.0005	20.7197
chr11	72254652	72255379	67	4.17596	8.60319	6.76435
chr11	72302221	72303658	33	3.40782	5.42943	3.38009
chr11	72351451	72351906	26	3.09125	4.66941	2.60267
chr11	72408780	72409069	16	2.38674	3.28232	1.67964
chr11	72420319	72421479	73	4.67698	9.50125	7.33039
chr11	72503239	72504055	67	3.90403	8.51521	6.72916
chr11	72608754	72610062	65	4.34553	8.30761	6.52735
chr11	72753851	72754557	213	9.39923	23.4698	21.3749
chr11	72814644	72814885	378	15.6424	41.0691	37.8349
chr11	72861083	72861700	201	9.66597	22.5941	20.1734
chr11	72951588	72952057	14	2.34113	2.94139	1.44939
chr11	72990128	72990749	10	2.13732	2.48678	1.02488
chr11	73142566	73143381	40	3.5407	5.76691	4.0021
chr11	74433058	74433417	5	1.54094	1.57815	0.54603
chr11	74536889	74538398	43	3.51969	6.11577	4.36284
chr11	74578272	74578635	65	3.79589	7.81767	6.5098
chr11	74584134	74585181	60	3.9336	7.71261	6.06629
chr11	74643562	74645120	32	3.52548	5.16861	3.29726
chr11	74710295	74711929	19	2.70051	3.61515	1.96514
chr11	74739156	74739915	12	2.31192	2.88441	1.2956
chr11	74916783	74917155	77	4.50175	9.68106	7.71283
chr11	74978752	74979210	134	5.96478	15.4098	13.4511
chr11	74991863	74993321	303	10.3692	32.958	30.3855
chr11	75003732	75004204	413	12.8126	44.1937	41.3484
chr11	75092888	75093300	461	14.0917	49.3147	46.1543
chr11	75105816	75106086	507	15.555	54.2233	50.7253
chr11	75161591	75162404	383	11.4127	41.3073	38.362
chr11	75273675	75275427	219	6.55872	24.5649	21.9418
chr11	75281379	75281845	78	3.1712	9.88466	7.80108
chr11	75300097	75301092	27	2.37036	4.53243	2.75634
chr11	75324313	75324554	15	2.29907	3.11019	1.58098
chr11	75333439	75333886	11	1.7087	2.23346	1.16617
chr11	75354637	75354878	22	2.44965	3.84251	2.22905
chr11	75370651	75371052	6	1.36571	1.54854	0.60585
chr11	75444074	75444646	18	2.51787	3.33956	1.82169
chr11	75467322	75467711	31	2.98337	4.71993	3.13917
chr11	75492539	75493526	52	3.95479	7.17699	5.282
chr11	75529223	75529464	75	4.04426	9.04164	7.54205
chr11	75546129	75547285	96	5.00314	11.4036	9.61337
chr11	75804744	75805022	171	8.4162	19.5591	17.1068
chr11	75992776	75993862	20	2.6586	3.66766	2.09195
chr11	76015392	76016069	16	2.61388	3.37979	1.6461
chr11	76030627	76031215	82	5.06217	10.0809	8.21431
chr11	76057001	76057631	218	9.40787	24.3922	21.8416
chr11	76133263	76133718	160	7.28113	18.2313	16.0671
chr11	76180252	76180503	111	5.52953	13.138	11.1988
chr11	76220301	76220958	158	7.41543	18.0671	15.8001
chr11	76224190	76224511	88	5.22249	10.9295	8.88294
chr11	76322674	76322992	54	3.82542	7.34652	5.45037
chr11	76350520	76350900	21	2.57064	3.78434	2.16486
chr11	76383144	76384393	6	1.6956	1.88691	0.66876
chr11	76427833	76428212	15	2.36889	3.00979	1.5455
chr11	76437725	76438691	9	2.14242	2.39433	0.90007
chr11	76576748	76577259	17	2.3838	3.28475	1.75173
chr11	76660196	76660585	20	2.39086	3.53408	2.08094
chr11	76733594	76733938	36	3.45528	5.28858	3.66467
chr11	76758765	76759542	27	3.32245	4.70073	2.76175
chr11	76811087	76812272	47	4.21073	6.66512	4.77187
chr11	76891654	76892103	29	3.35526	4.75239	2.96081
chr11	77305238	77306533	11	1.55259	2.0693	1.1668
chr11	77321396	77321827	59	4.41598	7.80618	5.95462
chr11	77420503	77421342	159	7.51707	18.1268	15.998
chr11	77443888	77444144	73	4.15483	9.01309	7.37719
chr11	77493554	77494016	52	4.08833	7.38916	5.28669
chr11	77499344	77501105	14	2.32099	2.94155	1.44974
chr11	77598925	77599818	8	1.68336	1.91126	0.89987
chr11	77606645	77607310	10	2.11299	2.42062	1.01085
chr11	77707051	77707690	25	3.11475	4.44289	2.55787
chr11	77744175	77745384	59	4.94026	8.38646	5.96053
chr11	77795223	77796175	72	4.9563	9.26772	7.28105
chr11	77798010	77798711	56	3.94351	7.36766	5.66527
chr11	77893560	77894181	132	6.14152	15.3219	13.2846
chr11	77907911	77908395	16	2.45657	3.33919	1.6682
chr11	77978753	77979162	23	3.13499	4.48267	2.38027
chr11	77991429	77993148	7	1.91799	2.11356	0.77102
chr11	77996655	77997440	55	4.36734	7.48331	5.57933
chr11	78059046	78060066	11	2.16238	2.57173	1.17093
chr11	78061412	78061779	16	2.99088	3.70857	1.63201
chr11	78075251	78075600	12	2.41655	3.02499	1.28577
chr11	78115042	78115342	12	1.9578	2.74695	1.23889
chr11	78141486	78142246	26	2.74625	4.27144	2.69803
chr11	78173792	78174146	6	1.74082	1.8749	0.6568
chr11	78214074	78214763	16	3.49617	4.26266	1.64947
chr11	78249356	78249654	13	2.30852	3.12146	1.36222
chr11	78304062	78305174	13	2.33515	3.24018	1.39456
chr11	78310990	78311594	8	2.13529	2.43375	0.86936
chr11	78325324	78325937	15	2.24603	2.9661	1.58106
chr11	78349048	78350017	13	2.38544	2.99506	1.30441
chr11	78363773	78364912	21	2.767	3.84713	2.16658
chr11	78509491	78509833	28	3.35518	4.67199	2.82011
chr11	78564771	78565243	18	2.56659	3.41408	1.83623
chr11	78640063	78640476	8	1.91763	2.32622	0.86472
chr11	78669643	78670149	6	1.6776	1.84426	0.69674
chr11	78737803	78738764	22	2.44544	3.69022	2.25205
chr11	78816647	78817489	13	2.30525	2.82137	1.32415
chr11	78819812	78820163	18	2.59325	3.40006	1.81881
chr11	78952373	78952614	22	2.89727	4.20106	2.29899
chr11	79067163	79068541	23	2.7666	4.11361	2.39741
chr11	79152937	79153618	136	5.62316	15.6316	13.6236
chr11	79391196	79391499	18	2.24988	3.44802	1.82483
chr11	79404599	79404845	56	4.63413	7.81656	5.69279
chr11	79419117	79419681	22	2.92023	4.01409	2.29564
chr11	79449753	79450125	12	2.26467	2.77637	1.2272
chr11	79472581	79473695	9	2.32208	2.61969	0.95709
chr11	79500347	79501232	34	3.75245	5.42367	3.45857
chr11	79517604	79518305	20	3.241	4.1329	2.03493
chr11	79545040	79545382	37	3.44472	5.30703	3.70536
chr11	79565905	79566408	94	5.73036	11.2378	9.46552
chr11	79652929	79653237	117	7.79862	14.5507	11.783
chr11	79710500	79710838	29	3.32259	4.76653	2.99729
chr11	79775563	79776598	12	2.26791	2.80728	1.28052
chr11	79787213	79787810	44	3.90859	6.48005	4.48216
chr11	79793358	79793599	13	2.72276	3.4014	1.36973
chr11	79805906	79807231	13	2.30359	2.92327	1.38362
chr11	79894041	79894765	11	2.1795	2.54225	1.10186
chr11	79903157	79903472	9	2.05214	2.31138	0.90965
chr11	79955343	79956097	18	2.58501	3.3862	1.88841
chr11	79963318	79963674	29	3.09139	4.48617	2.96162
chr11	79967261	79967853	44	4.09535	6.3816	4.49822
chr11	79991258	79991972	30	3.32731	4.7737	3.06124
chr11	79997296	79997682	8	2.0119	2.2282	0.8392
chr11	80022359	80023053	11	2.26968	2.72431	1.17897
chr11	80191241	80191702	15	2.50557	3.12054	1.52035
chr11	80196277	80197140	26	3.02442	4.31189	2.60324
chr11	80242013	80242536	134	6.53904	15.3718	13.4753
chr11	80593108	80593407	212	9.19562	23.5033	21.2591
chr11	80631679	80632025	170	8.51569	19.5395	17.0416
chr11	80947101	80947847	9	1.29705	1.63504	0.97032
chr11	80965768	80966554	14	2.21908	2.75203	1.40287
chr11	82111810	82112246	16	2.64129	3.35768	1.67118
chr11	82425592	82425846	40	3.9024	5.98697	4.00537
chr11	82504152	82504474	17	2.65658	3.44135	1.73267
chr11	82577381	82578169	112	5.97707	13.34	11.2824
chr11	82641267	82641872	468	16.3588	50.8188	46.8651
chr11	82721577	82722192	560	18.7415	59.7028	56.0635
chr11	83037798	83038074	689	23.6943	73.1991	68.9318
chr11	83085073	83085536	412	14.8522	43.9459	41.2988
chr11	83104930	83105879	394	15.2369	42.3929	39.4841
chr11	83111588	83112144	175	7.86687	19.3552	17.5651
chr11	83115945	83116616	37	3.11242	5.47305	3.73606
chr11	83153250	83153544	54	4.26063	7.26135	5.46496
chr11	83257473	83258500	209	10.8712	23.866	20.9168
chr11	83275407	83276371	201	10.1225	22.7806	20.1832
chr11	83285947	83287245	105	5.98296	12.5041	10.5306
chr11	83369815	83370068	43	3.11641	5.79104	4.31903
chr11	83396065	83396868	41	3.7104	6.05997	4.18705
chr11	83566962	83568022	13	2.36279	2.88527	1.37971
chr11	83600536	83601508	49	4.55259	7.15396	4.94162
chr11	83613107	83614359	43	3.65184	5.96055	4.32931
chr11	83645913	83646394	16	2.25095	3.10208	1.65739
chr11	83755461	83755987	30	3.46405	4.92455	3.02857
chr11	83777854	83778243	48	4.20403	6.71185	4.8568
chr11	84376556	84376797	39	3.99331	6.4486	3.95311
chr11	84632166	84632966	107	4.82751	12.7669	10.7387
chr11	84693385	84694101	188	8.65094	20.7484	18.8834
chr11	84729596	84730124	65	4.38015	8.12589	6.5262
chr11	84953287	84953976	14	2.4533	3.00818	1.42993
chr11	85047943	85048869	32	3.27756	4.97732	3.21037
chr11	85124794	85125197	8	2.05032	2.30837	0.89569
chr11	85166314	85166605	17	2.61151	3.30218	1.70957
chr11	85655415	85655693	12	2.53989	3.0783	1.29016
chr11	85656767	85657774	10	1.89292	2.22673	1.00331
chr11	85689878	85690384	7	1.87964	2.03039	0.72555
chr11	85793888	85794274	15	2.53761	3.14162	1.54208
chr11	86170759	86171975	27	3.07504	4.46342	2.78305
chr11	86357892	86358510	18	2.61409	3.40381	1.84222
chr11	86390274	86391273	15	2.80844	3.44876	1.59898
chr11	86400307	86400830	24	3.16987	4.28093	2.43625
chr11	86497277	86497552	14	2.65129	3.2458	1.41306
chr11	86570515	86571607	71	4.46514	8.95114	7.1061
chr11	86886902	86887435	37	3.18161	5.3092	3.71861
chr11	86899866	86900475	22	2.46848	3.81914	2.2618
chr11	86922614	86923496	16	2.39857	3.09968	1.60745
chr11	86940526	86941126	55	3.89777	7.28576	5.59998
chr11	87217862	87218909	8	1.81664	2.13862	0.88734
chr11	87256108	87257253	112	5.98056	13.0765	11.2735
chr11	87261638	87263015	83	5.42735	10.4056	8.38361
chr11	87275916	87276247	18	2.36759	3.18213	1.83571
chr11	87284527	87285142	8	1.73379	2.10015	0.88425
chr11	87388221	87388735	17	3.18663	3.94481	1.7059
chr11	87405063	87405383	12	2.24319	2.70182	1.27933
chr11	87430522	87430908	13	2.16448	2.78933	1.32801
chr11	87550564	87551188	20	3.17114	4.06977	2.00852
chr11	87561561	87563330	12	2.48314	2.94311	1.25378
chr11	87569651	87570338	18	2.38655	3.12863	1.82394
chr11	87666468	87667183	13	2.27933	2.75701	1.32271
chr11	87800717	87800992	5	1.49125	1.51258	0.51695
chr11	87841129	87841422	7	1.96129	2.11626	0.72364
chr11	87860900	87861877	34	2.93314	5.06748	3.4538
chr11	87881432	87882283	131	6.27489	15.1974	13.1663
chr11	87912802	87913162	25	3.51416	4.84671	2.55067
chr11	87974638	87975554	15	2.4684	3.32381	1.58252
chr11	88000902	88001292	24	2.9008	4.05114	2.45921
chr11	88017725	88018182	14	2.04311	2.61185	1.45487
chr11	88107633	88108297	72	4.74058	8.86868	7.23007
chr11	88120802	88121891	45	3.87807	6.31516	4.58677
chr11	88345376	88346360	22	3.82601	4.87229	2.2379
chr11	88347936	88348356	19	2.98671	3.83158	1.93218
chr11	88396124	88396991	11	1.97779	2.36011	1.15795
chr11	88550985	88551753	11	2.02266	2.40628	1.16684
chr11	88579051	88579954	16	2.55384	3.20344	1.6378
chr11	88688341	88689045	20	3.0327	3.90355	2.03488
chr11	88703648	88704893	8	2.13954	2.38935	0.89495
chr11	88725784	88726423	14	2.29989	2.9355	1.47379
chr11	88835046	88835625	107	5.921	12.6812	10.7752
chr11	88858125	88858642	343	14.0148	37.4833	34.3849
chr11	88860382	88861027	295	11.0528	32.001	29.5191
chr11	88921627	88922052	331	12.4717	36.0695	33.133
chr11	88928711	88929793	146	6.56722	16.8549	14.6657
chr11	88966387	88967418	14	2.48918	3.2113	1.41824
chr11	89163418	89163659	14	2.67037	3.35396	1.49809
chr11	90499259	90500115	47	4.15878	6.83741	4.73289
chr11	90548457	90549058	38	2.92758	5.08518	3.82018
chr11	93189723	93189985	148	8.31676	17.5202	14.8991
chr11	93333038	93333464	111	5.45992	12.6122	11.107
chr11	93747018	93747320	319	13.1087	35.378	31.9884
chr11	93816776	93817193	218	9.2482	24.3079	21.8402
chr11	93829210	93829954	132	5.99356	15.3006	13.2029
chr11	94010417	94010838	21	2.94673	4.26034	2.1885
chr11	94039564	94040130	14	2.20984	2.94497	1.42455
chr11	94072056	94073176	5	1.68559	1.75517	0.5899
chr11	94131332	94131745	37	4.14007	6.01322	3.78463
chr11	94182869	94183986	28	3.12569	4.53317	2.8238
chr11	94189169	94189642	13	2.7208	3.26632	1.38652
chr11	94410042	94410675	11	2.16401	2.574	1.14064
chr11	94490923	94492005	9	2.04837	2.41173	0.99426
chr11	94502393	94502634	5	1.64427	1.72674	0.55662
chr11	94514934	94515412	12	2.17616	2.67953	1.22143
chr11	94538394	94538970	15	2.31351	2.90558	1.52434
chr11	94558896	94559520	51	4.37492	7.07424	5.15174
chr11	94818953	94819245	14	2.7991	3.37576	1.48786
chr11	94840395	94840636	12	2.6845	3.20235	1.28213
chr11	94850813	94851195	24	2.70729	4.11781	2.44705
chr11	94967886	94968432	47	3.77292	6.56857	4.79157
chr11	94976944	94977185	39	3.84769	5.83613	3.91001
chr11	95120134	95120677	12	2.47963	2.92083	1.20958
chr11	95170748	95173069	24	2.73338	3.98586	2.43842
chr11	95198009	95199062	11	2.38624	2.85663	1.11861
chr11	95245806	95246671	26	2.97195	4.35802	2.68185
chr11	95275765	95276446	14	2.37321	3.33859	1.43507
chr11	95347107	95347403	12	2.47814	3.07868	1.29969
chr11	95382143	95383301	9	2.10919	2.42573	0.95883
chr11	95393542	95394142	40	3.35637	5.6696	4.06553
chr11	95446678	95447849	59	3.86182	7.41612	5.97069
chr11	95527760	95528397	19	2.51267	3.53395	1.91229
chr11	95657770	95658278	52	3.54578	6.79163	5.21927
chr11	95666391	95667345	89	5.14342	11.179	8.95689
chr11	95703373	95703934	97	5.4257	11.7668	9.74117
chr11	95720539	95720841	55	3.39507	6.91277	5.53677
chr11	95737165	95737859	58	4.24517	7.87693	5.89911
chr11	95842455	95844124	17	2.68637	3.61439	1.7922
chr11	95852178	95852578	14	1.9544	2.7356	1.44856
chr11	95855906	95856272	43	3.30434	6.40133	4.39506
chr11	95866069	95867408	16	2.53561	3.45719	1.6718
chr11	95895848	95896321	55	3.71976	7.06901	5.52834
chr11	95926349	95926954	108	5.62842	12.6575	10.8293
chr11	95936672	95938016	50	3.7384	6.79268	5.01342
chr11	95975588	95976001	13	2.49004	3.1008	1.33844
chr11	95991968	95992443	11	2.45592	2.91791	1.13433
chr11	96133016	96133486	9	1.94495	2.41802	0.95862
chr11	96164057	96164664	51	3.97155	6.98998	5.14301
chr11	96176059	96176300	68	4.01115	8.27075	6.87791
chr11	96215581	96216341	51	3.73048	6.9153	5.15863
chr11	96387651	96387942	32	3.0599	5.00768	3.235
chr11	96545496	96545773	17	2.37378	3.55287	1.73818
chr11	96553304	96554779	20	2.32238	3.68404	2.00858
chr11	96573628	96575662	210	7.88767	23.4142	21.0028
chr11	96641450	96642935	272	10.8845	29.926	27.235
chr11	96650327	96650722	160	7.69649	18.4168	16.0545
chr11	96680597	96680985	84	5.33069	10.6296	8.42702
chr11	96691065	96692029	34	3.26877	5.2282	3.45452
chr11	96777414	96778531	36	3.67008	5.81105	3.67766
chr11	96838802	96839227	7	1.82304	2.14082	0.78293
chr11	96883154	96883538	12	2.31248	2.88912	1.21898
chr11	96902806	96903097	18	2.78751	3.76358	1.81598
chr11	96907445	96907702	13	2.39695	3.07844	1.39662
chr11	96927891	96928334	20	2.69637	3.86945	2.00548
chr11	97011695	97012325	26	3.35818	4.97253	2.69574
chr11	97048318	97049925	17	2.44853	3.4034	1.74395
chr11	97141161	97141645	16	2.23248	3.39538	1.626
chr11	97171132	97171594	19	2.78573	4.27395	1.96385
chr11	97177013	97177472	17	2.42532	3.41191	1.7658
chr11	97199841	97200090	14	2.62787	3.32522	1.4344
chr11	97289182	97289688	14	2.67429	3.33267	1.49681
chr11	97459771	97460520	26	2.99528	4.40469	2.61662
chr11	97491053	97491341	99	5.49009	11.6411	9.95026
chr11	97493273	97493606	128	6.98304	15.0003	12.8448
chr11	97517607	97518052	54	4.0647	7.27272	5.44679
chr11	97520584	97525976	34	3.06533	5.3396	3.47556
chr11	97560190	97561604	34	3.40488	5.15908	3.41392
chr11	97564338	97565128	84	5.81892	10.6153	8.42262
chr11	97582525	97582939	4	1.21642	1.24202	0.49797
chr11	97606181	97606554	10	2.22456	2.62214	1.04724
chr11	97643419	97644017	20	2.34374	3.75617	2.00469
chr11	97663005	97663488	80	4.99181	10.8322	8.0111
chr11	97692154	97692435	47	3.11628	6.4881	4.79863
chr11	97702522	97702887	64	4.03653	8.65683	6.47809
chr11	97745066	97746101	23	2.54524	4.0135	2.32047
chr11	97814797	97815090	20	2.53074	3.48932	2.02387
chr11	97848876	97849461	13	2.38494	2.89419	1.30553
chr11	97866310	97866551	11	2.53503	2.93666	1.14653
chr11	97883679	97884213	8	1.9874	2.23614	0.89829
chr11	97887625	97888751	14	2.45347	3.0384	1.4496
chr11	97919247	97919991	13	2.2544	2.85051	1.33763
chr11	97928339	97928788	41	4.2246	6.30198	4.1637
chr11	98010604	98011818	11	2.25563	2.65376	1.1706
chr11	98054235	98054819	38	3.45494	5.58733	3.81055
chr11	98063302	98063728	266	12.3838	29.8472	26.6312
chr11	98158907	98159322	236	10.0381	25.981	23.6962
chr11	98194794	98195161	376	13.7381	40.3466	37.6735
chr11	98197601	98197955	457	16.1217	48.8371	45.7878
chr11	98273447	98273867	312	11.2184	33.4351	31.2554
chr11	98318788	98319510	313	10.1333	33.9799	31.3909
chr11	98458611	98458949	136	5.46982	15.1851	13.6881
chr11	98543585	98544187	72	4.39414	9.1404	7.21279
chr11	98590400	98590961	20	2.73408	3.70965	2.04483
chr11	98624382	98625400	17	2.52151	3.33775	1.73608
chr11	98635143	98635566	12	2.432	2.92071	1.2452
chr11	98644585	98644934	13	2.15883	2.74764	1.33687
chr11	98650084	98650476	43	3.59237	6.09709	4.32908
chr11	98655819	98656560	117	6.1387	13.784	11.7913
chr11	98670666	98671617	57	3.98398	7.59028	5.77975
chr11	98724583	98725531	24	2.62981	3.99712	2.4283
chr11	98798896	98799358	14	2.1632	2.8716	1.40854
chr11	98803219	98803784	60	4.47884	8.05079	6.00161
chr11	98815619	98815950	48	3.95722	6.75962	4.8407
chr11	98843520	98844030	11	2.5134	2.96768	1.17283
chr11	98846214	98846455	37	3.6073	5.46826	3.76111
chr11	98885015	98886024	57	4.50145	7.59812	5.75572
chr11	99091895	99092566	9	2.21232	2.525	0.97039
chr11	100030912	100031189	16	2.57026	3.23459	1.6688
chr11	100126803	100127092	8	2.20726	2.43138	0.82588
chr11	100136164	100136428	6	1.93937	2.10231	0.69264
chr11	100139196	100140279	5	1.73734	1.8045	0.59006
chr11	100143368	100144266	16	3.0013	3.66683	1.64031
chr11	100180765	100181921	68	4.24961	8.82892	6.83085
chr11	100216673	100218723	22	2.35692	3.79554	2.24949
chr11	100237256	100238085	24	2.78548	4.08331	2.43343
chr11	100275411	100275824	67	5.73098	9.3664	6.76372
chr11	100302046	100302549	53	4.26477	7.38207	5.38158
chr11	100333727	100334457	23	2.7348	4.01227	2.35729
chr11	100388686	100390311	9	1.93535	2.428	0.93403
chr11	100406767	100407035	40	3.10978	5.73953	4.01745
chr11	100480410	100481641	39	3.5238	5.77908	3.99792
chr11	100484032	100484431	38	3.2807	5.44323	3.80146
chr11	100501474	100501841	99	5.76044	11.9892	9.90744
chr11	100507516	100507851	96	5.17856	11.3859	9.69438
chr11	100573393	100573910	88	5.24692	10.8651	8.82144
chr11	100599281	100599802	80	5.02694	9.95558	8.00155
chr11	100635669	100636098	57	3.90118	7.38839	5.7019
chr11	100643344	100643833	24	2.17373	3.49484	2.47033
chr11	100800281	100801302	11	1.94532	2.50028	1.19674
chr11	100821941	100822351	29	3.10791	4.59546	2.90313
chr11	100823657	100823898	43	3.82042	6.13764	4.34181
chr11	100831571	100832371	15	2.21589	2.88612	1.59123
chr11	100870425	100870958	13	2.19866	2.88769	1.33339
chr11	100928008	100928574	10	2.11014	2.53112	1.06561
chr11	100980883	100981624	61	4.66352	8.06934	6.1215
chr11	101032467	101033352	109	7.02234	13.255	10.9023
chr11	101035068	101035514	138	7.73149	15.9986	13.8371
chr11	101087487	101087757	143	7.81992	16.4945	14.3988
chr11	101114914	101115315	52	4.00986	6.82753	5.27296
chr11	101139986	101140651	62	4.56916	8.04198	6.20001
chr11	101177459	101177716	95	6.05214	11.5431	9.5935
chr11	101195500	101196250	38	3.72902	5.72827	3.85309
chr11	101278338	101278876	12	2.38556	2.89257	1.26745
chr11	101286004	101286746	27	3.17377	4.50082	2.74565
chr11	101303491	101304042	20	2.66827	3.61862	2.05421
chr11	101326309	101327386	12	2.48875	2.98561	1.27619
chr11	101329253	101329808	7	1.84191	2.02847	0.72978
chr11	101413557	101414495	14	2.51047	3.09623	1.48035
chr11	101488469	101489495	7	1.98574	2.16714	0.77536
chr11	101502562	101503657	17	2.66098	3.38394	1.72762
chr11	101506617	101507003	8	1.77273	1.95906	0.80688
chr11	101518813	101520258	32	2.99057	4.85856	3.26395
chr11	101594181	101594545	15	2.13324	2.98189	1.51554
chr11	101633748	101634160	95	4.12811	11.5784	9.54594
chr11	101645920	101649000	216	8.54831	23.9132	21.6331
chr11	101682312	101682664	98	5.35582	11.6459	9.83349
chr11	101785952	101786760	77	4.47263	9.32358	7.73564
chr11	101788388	101789558	75	4.84245	9.52574	7.59755
chr11	101830061	101830411	32	3.1402	4.92786	3.24131
chr11	101845588	101846285	17	2.49309	3.4836	1.77749
chr11	102017372	102017924	19	2.32494	3.57082	1.93711
chr11	102046218	102046764	21	2.26938	3.76634	2.11867
chr11	102091194	102091602	11	2.27499	2.80523	1.1848
chr11	102110006	102110500	12	2.13718	2.7296	1.24282
chr11	102137753	102138281	88	4.98282	10.7213	8.81713
chr11	102157055	102158407	184	7.90483	20.7274	18.4774
chr11	102180864	102181254	277	10.2339	30.3294	27.7068
chr11	102190092	102191119	331	11.2436	36.1905	33.1721
chr11	102254623	102254995	170	5.55299	18.763	17.0908
chr11	102267888	102268227	260	8.56193	28.3777	26.0618
chr11	102298611	102300084	336	12.3943	36.4617	33.6997
chr11	102308736	102309095	330	12.9311	35.8341	33.0263
chr11	102417017	102417799	257	11.1895	28.298	25.7222
chr11	102424590	102424873	71	4.44255	9.07696	7.12622
chr11	102434313	102434863	22	2.52798	3.72864	2.21862
chr11	102465866	102466893	22	2.90877	3.98048	2.23418
chr11	102558588	102559568	24	2.66588	4.0097	2.48131
chr11	102635084	102636251	74	5.15635	9.63541	7.49891
chr11	102680477	102681042	55	3.87336	7.09423	5.5905
chr11	102741716	102742524	88	5.65259	10.8188	8.83038
chr11	102786418	102786858	31	3.41014	5.00994	3.18669
chr11	102807535	102808473	23	2.88573	3.99791	2.36457
chr11	102809961	102810205	55	4.05953	7.21563	5.55794
chr11	102889500	102890268	151	6.83629	17.2577	15.1454
chr11	102964033	102964295	223	8.76038	24.7796	22.3803
chr11	102975796	102978681	43	3.55084	6.26291	4.39918
chr11	102993539	102995503	47	3.68248	6.47506	4.79728
chr11	103020156	103020758	16	2.62459	3.50724	1.68744
chr11	103036141	103036389	26	2.8482	4.25113	2.61007
chr11	103046146	103046411	42	3.93015	6.37452	4.21567
chr11	103060591	103061136	24	2.89355	4.20077	2.44913
chr11	103085075	103085443	19	2.95209	3.96781	1.95376
chr11	103193997	103195221	8	2.08516	2.4163	0.88452
chr11	103221650	103221898	9	2.16841	2.43506	0.91893
chr11	103223501	103225349	7	2.09019	2.27733	0.77125
chr11	103304551	103305194	4	1.47028	1.46	0.45532
chr11	103310907	103311242	14	2.55738	3.12515	1.47791
chr11	103426144	103426429	6	1.78456	1.89671	0.66075
chr11	103558757	103559230	24	3.30444	4.40689	2.43943
chr11	103589661	103590187	13	2.03859	2.50774	1.34176
chr11	103677992	103678564	12	2.52663	3.09483	1.28812
chr11	103781971	103782413	17	2.50677	3.40998	1.76299
chr11	103814970	103815745	33	3.42306	5.19232	3.39068
chr11	103827770	103828452	15	2.28132	3.01303	1.58001
chr11	103874571	103874822	20	3.09137	4.07011	2.06651
chr11	103934098	103934339	64	4.78468	8.4773	6.46931
chr11	104019479	104019720	53	3.7636	6.77911	5.30455
chr11	104093498	104093805	109	6.71219	13.3002	10.9012
chr11	104119038	104120167	37	2.8305	4.86884	3.74769
chr11	104147914	104148155	51	3.82283	6.70635	5.13079
chr11	104150229	104151113	13	2.31802	2.87726	1.37725
chr11	104153634	104154561	36	3.78726	5.62291	3.64871
chr11	104156897	104157312	19	2.70508	3.53667	1.95739
chr11	104166258	104168692	124	7.02055	14.48	12.4526
chr11	104302163	104304562	68	4.45215	8.53401	6.81274
chr11	104411566	104412195	20	3.03344	3.95323	2.06251
chr11	104542752	104543212	16	2.42869	3.26152	1.67395
chr11	104644259	104644525	31	2.94382	4.74927	3.17354
chr11	104987656	104988343	17	2.64322	3.40413	1.79039
chr11	105012178	105013299	23	3.20627	4.3464	2.3888
chr11	105026085	105026615	16	2.42149	3.19579	1.68719
chr11	105041957	105042755	155	7.84561	17.8958	15.5575
chr11	105224257	105224498	271	10.9958	29.526	27.1213
chr11	105805301	105806068	174	7.37889	19.1767	17.4753
chr11	105811290	105811992	120	5.39014	13.4223	12.0972
chr11	105813756	105813997	40	2.25211	4.73227	4.09275
chr11	105829259	105829928	185	9.40017	21.3077	18.5466
chr11	105881363	105881953	31	3.19106	4.85844	3.13692
chr11	105897879	105898347	7	1.86717	2.08774	0.73952
chr11	105927289	105927557	10	1.77295	2.22152	1.03013
chr11	106021288	106022085	7	1.9261	2.101	0.76978
chr11	106077328	106078682	19	2.57625	3.58867	1.94027
chr11	106116859	106117797	154	7.48252	17.5348	15.4811
chr11	106133879	106134473	31	3.39931	4.90717	3.15253
chr11	106362018	106362806	13	2.37853	2.99843	1.35187
chr11	106385665	106385946	12	1.96449	2.48229	1.28267
chr11	106474026	106474530	18	2.73276	3.4986	1.81871
chr11	106576388	106576629	21	3.18297	4.14119	2.11625
chr11	106584136	106584794	32	3.68051	5.25242	3.24892
chr11	106640460	106641044	17	2.79109	3.55855	1.73223
chr11	106648499	106651138	38	3.33695	5.5871	3.84673
chr11	106781474	106781997	178	8.40769	20.0538	17.8455
chr11	106860587	106861252	48	3.90648	6.62741	4.83288
chr11	106873898	106874266	8	2.07666	2.3087	0.86101
chr11	106992292	106993656	17	2.53241	3.36858	1.70188
chr11	107050229	107050791	57	3.97216	7.40387	5.71318
chr11	107220471	107220816	231	9.49426	25.1733	23.1482
chr11	107297293	107297543	99	4.96159	11.2574	9.92333
chr11	107340772	107341216	59	4.69416	8.09658	5.91751
chr11	107408739	107409714	20	2.66067	3.61266	2.0307
chr11	107748562	107748935	98	5.24446	11.6264	9.80024
chr11	107845076	107845454	174	7.61318	19.6215	17.4991
chr11	108204910	108205376	138	6.87995	16.2283	13.8734
chr11	108286238	108286511	48	3.52415	6.57756	4.86739
chr11	108872944	108873472	13	2.35933	2.85238	1.30124
chr11	109086908	109087149	25	4.05723	5.26142	2.54103
chr11	109159428	109159669	25	3.2448	4.44867	2.57464
chr11	109222359	109224718	21	2.82921	3.95742	2.1015
chr11	109287411	109287787	10	2.06176	2.61411	1.09538
chr11	109334585	109335344	20	2.46472	3.58398	2.05198
chr11	109510599	109512773	9	2.03561	2.40609	0.97954
chr11	109857072	109857316	9	2.39441	2.79205	1
chr11	110120159	110120444	9	1.69948	2.11733	0.9704
[truncated: 7,841 more rows]
