# Supplementary material for: YY1 and CTCF orchestrate a 3D chromatin looping switch during early neural lineage commitment
Source: HighWire-hosted journal article supplement (doi:10.1101/gr.215160.116), 2017-05-23
Supplement: Supplemental_Table_S14.xlsx [file Supplemental_Table_S14.xlsx]

## Sheet: ES_Enhancer_MTD_160712_Galaxy13
Beagan et al. 2017
Table S14, ES Enhancer Annotations
#chr	start	end
chr1	4790984	4792009
chr1	4793038	4793557
chr1	4794312	4795134
chr1	4800506	4800958
chr1	4808731	4809885
chr1	4841555	4842880
chr1	4958981	4962038
chr1	5250197	5250900
chr1	6272872	6273138
chr1	7299581	7299777
chr1	8572498	8572806
chr1	9941902	9942668
chr1	10806553	10806824
chr1	11267853	11268411
chr1	11319601	11319896
chr1	11390525	11391526
chr1	12701400	12701991
chr1	12712414	12713138
chr1	12730804	12731202
chr1	12732078	12733649
chr1	12734322	12734488
chr1	12735207	12736051
chr1	12737750	12739345
chr1	12742375	12742619
chr1	12744134	12744993
chr1	12798169	12798879
chr1	12801263	12802233
chr1	12803813	12805029
chr1	13047371	13047544
chr1	13061927	13064383
chr1	13065362	13069013
chr1	13069850	13071145
chr1	13072409	13075761
chr1	13081073	13082618
chr1	13083474	13087448
chr1	13090487	13091088
chr1	13092846	13096572
chr1	13123603	13123958
chr1	13136478	13136952
chr1	13206565	13206741
chr1	13590232	13590408
chr1	13622659	13623044
chr1	15780691	15782794
chr1	15783457	15783677
chr1	16641959	16642562
chr1	17921725	17922015
chr1	20857883	20858608
chr1	20895453	20896834
chr1	20898869	20899250
chr1	20900706	20901135
chr1	20902665	20902983
chr1	21221100	21221494
chr1	21245771	21248097
chr1	22367287	22368066
chr1	22474031	22474498
chr1	25944237	25945655
chr1	33868179	33868408
chr1	33959879	33960399
chr1	33996280	33997037
chr1	34000676	34004720
chr1	34093631	34095476
chr1	34121722	34122487
chr1	34124136	34132214
chr1	34132965	34133271
chr1	34153849	34154484
chr1	34160181	34162408
chr1	34163528	34168147
chr1	34184678	34184841
chr1	34195935	34198745
chr1	34213266	34214909
chr1	35882641	35883556
chr1	35998109	35998873
chr1	36000236	36002027
chr1	36039302	36039935
chr1	36060424	36060855
chr1	36067303	36077493
chr1	36109516	36110785
chr1	36111464	36113124
chr1	36113844	36114571
chr1	36144476	36146999
chr1	36147756	36147920
chr1	36297007	36297398
chr1	36370712	36374900
chr1	36635386	36638158
chr1	36652397	36653218
chr1	36665346	36665774
chr1	36668408	36670763
chr1	36825336	36826188
chr1	36827580	36828822
chr1	36871446	36872153
chr1	36901826	36902815
chr1	36913787	36914173
chr1	36957519	36957730
chr1	36958740	36962497
chr1	36976747	36977197
chr1	36978546	36978729
chr1	36999883	37001584
chr1	37038785	37042617
chr1	37043354	37047971
chr1	37053359	37054002
chr1	37058121	37059241
chr1	37098492	37100212
chr1	37157306	37159024
chr1	37159730	37159996
chr1	37185288	37187174
chr1	37188133	37188801
chr1	37940052	37940859
chr1	38116491	38116654
chr1	38677642	38677870
chr1	39487093	39488479
chr1	39962986	39964517
chr1	39980113	39980586
chr1	40000697	40002129
chr1	51679569	51679752
chr1	51680426	51683376
chr1	51803579	51804639
chr1	51936457	51937262
chr1	53923449	53924205
chr1	54641400	54643019
chr1	55164015	55167273
chr1	55255813	55256000
chr1	56753760	56754279
chr1	57390778	57390983
chr1	57426173	57426686
chr1	57532535	57533241
chr1	57533958	57534321
chr1	57668617	57670341
chr1	58046149	58047487
chr1	58423370	58423666
chr1	58466664	58466911
chr1	59008846	59009012
chr1	59014903	59015266
chr1	59016052	59016267
chr1	59378979	59379579
chr1	59432134	59434738
chr1	59478785	59481647
chr1	59483232	59484265
chr1	59503944	59506544
chr1	59507355	59508040
chr1	59529336	59530304
chr1	59665978	59666141
chr1	59752459	59754091
chr1	59754896	59756015
chr1	59785469	59786261
chr1	60906081	60906932
chr1	60908094	60911660
chr1	62782704	62785205
chr1	62788967	62790030
chr1	62807249	62807535
chr1	62811484	62812336
chr1	62823704	62824326
chr1	62840671	62840942
chr1	62842248	62842623
chr1	63152710	63153413
chr1	63154232	63155816
chr1	63156681	63157986
chr1	63163308	63163624
chr1	63164924	63165310
chr1	63176385	63178604
chr1	63183530	63183706
chr1	63184621	63187004
chr1	63249905	63252242
chr1	63253798	63254488
chr1	63255802	63258025
chr1	63263522	63263699
chr1	63370510	63371725
chr1	63477373	63479348
chr1	63485659	63489497
chr1	63504886	63505267
chr1	64350882	64352616
chr1	64625279	64625971
chr1	67980497	67981779
chr1	71083267	71083738
chr1	71682206	71682823
chr1	71691244	71692392
chr1	71693406	71694887
chr1	71704900	71705515
chr1	71719979	71720166
chr1	72219788	72220363
chr1	72221444	72221663
chr1	72249070	72249953
chr1	72250687	72251120
chr1	72251776	72252369
chr1	72253420	72254313
chr1	72255522	72256258
chr1	72273885	72277844
chr1	72292650	72293989
chr1	72687304	72687946
chr1	72718614	72719843
chr1	72760794	72761315
chr1	72811188	72811382
chr1	72836943	72837516
chr1	72850743	72854702
chr1	72859071	72860781
chr1	73006093	73006777
chr1	74136633	74139765
chr1	74157244	74160015
chr1	74303105	74303670
chr1	74341956	74343164
chr1	74345112	74346611
chr1	74347387	74347709
chr1	74352928	74355136
chr1	74356043	74356880
chr1	74433147	74434619
chr1	74826924	74827645
chr1	74828714	74828899
chr1	74869906	74873449
chr1	74876796	74877019
chr1	74896572	74898688
chr1	75223991	75224193
chr1	75340531	75342773
chr1	75376409	75376671
chr1	75479226	75479599
chr1	75483125	75484377
chr1	75505902	75510047
chr1	75513078	75513849
chr1	75514618	75515298
chr1	75590049	75590878
chr1	75592459	75592817
chr1	75605433	75605976
chr1	75801665	75802285
chr1	75884837	75885000
chr1	77443074	77443727
chr1	77447915	77449199
chr1	77450540	77451978
chr1	77452782	77455629
chr1	77456897	77459410
chr1	77463624	77463862
chr1	77466945	77467278
chr1	77469281	77471285
chr1	77500156	77500760
chr1	78598320	78599093
chr1	82280068	82281180
chr1	82815911	82817068
chr1	84634269	84634561
chr1	84842258	84843623
chr1	84844379	84847223
chr1	84847942	84849406
chr1	84852505	84853332
chr1	84854781	84859765
chr1	84860480	84864511
chr1	84865242	84866632
chr1	84867293	84871735
chr1	84878182	84878345
chr1	84884355	84884604
chr1	84885703	84889039
chr1	87677131	87677299
chr1	87955678	87956576
chr1	87957338	87957621
chr1	88047727	88048081
chr1	88083560	88086589
chr1	88132902	88133255
chr1	88202089	88210546
chr1	88330543	88331615
chr1	88336422	88340901
chr1	88344243	88344992
chr1	88353404	88353653
chr1	88360433	88365015
chr1	88366618	88370651
chr1	88371471	88373236
chr1	88377739	88379433
chr1	88383378	88391024
chr1	88392623	88396660
chr1	88397315	88404200
chr1	88405185	88408084
chr1	88408756	88409073
chr1	88616126	88616394
chr1	88649563	88650458
chr1	88654905	88655581
chr1	89113642	89115356
chr1	89119346	89119540
chr1	89121948	89127245
chr1	89127926	89132684
chr1	89205586	89206615
chr1	89585530	89585975
chr1	90329785	90330180
chr1	90355139	90356681
chr1	90362956	90363753
chr1	90498954	90499174
chr1	90506872	90507123
chr1	90507883	90510149
chr1	90696342	90697664
chr1	90921404	90922908
chr1	90930257	90930420
chr1	90988773	90989326
chr1	90990382	90993453
chr1	91005164	91006780
chr1	91027090	91030758
chr1	91087148	91089289
chr1	91361609	91363751
chr1	91371248	91372281
chr1	91414206	91415153
chr1	91418103	91418266
chr1	91473674	91473837
chr1	91757157	91757668
chr1	91758606	91759137
chr1	91765822	91768676
chr1	91769450	91769630
chr1	91771947	91775539
chr1	92399905	92400435
chr1	92416688	92417842
chr1	92420399	92422012
chr1	92934730	92935287
chr1	92939828	92940488
chr1	93033116	93033661
chr1	93432226	93433689
chr1	93443499	93443715
chr1	93859497	93861477
chr1	94010146	94012111
chr1	94015927	94016382
chr1	94024913	94025123
chr1	94243831	94245570
chr1	94326542	94331916
chr1	95123239	95124844
chr1	97650960	97651663
chr1	98771945	98772152
chr1	103653513	103653778
chr1	106908739	106908902
chr1	107386696	107387115
chr1	108176132	108176581
chr1	112670830	112671275
chr1	115859732	115861935
chr1	120240437	120240918
chr1	120265013	120266173
chr1	120295317	120295708
chr1	120307540	120307703
chr1	120521566	120522044
chr1	120535482	120550408
chr1	120555905	120556118
chr1	120586572	120588265
chr1	120769975	120770597
chr1	120813221	120813497
chr1	120878256	120880701
chr1	120882250	120882915
chr1	120946549	120946952
chr1	120970616	120975449
chr1	120976715	120977001
chr1	120978651	120980303
chr1	121040810	121041611
chr1	121064062	121064671
chr1	121195707	121203406
chr1	121243859	121246382
chr1	121251965	121252310
chr1	121294108	121297489
chr1	121300875	121301567
chr1	121339737	121340588
chr1	121382620	121382973
chr1	121383755	121384766
chr1	121393159	121396277
chr1	121477879	121478368
chr1	121973129	121973333
chr1	121974133	121975834
chr1	121979308	121980984
chr1	121982639	121983979
chr1	121984903	121986688
chr1	122014864	122015241
chr1	129113660	129114554
chr1	129154546	129155160
chr1	129678353	129680094
chr1	129895206	129895426
chr1	129896246	129897309
chr1	129898877	129899345
chr1	130755943	130757851
chr1	133031846	133032086
chr1	133040943	133041156
chr1	133043523	133046764
chr1	133375475	133375873
chr1	133780712	133782238
chr1	133784620	133786407
chr1	133787314	133790778
chr1	133796594	133797897
chr1	133809081	133809970
chr1	133814071	133814306
chr1	134049888	134050732
chr1	134054219	134057329
chr1	134083687	134084669
chr1	134134664	134135614
chr1	134159090	134159588
chr1	134160403	134166671
chr1	134176867	134177038
chr1	134177798	134179922
chr1	134187888	134190144
chr1	134217004	134223511
chr1	134268244	134268545
chr1	134365549	134366529
chr1	134367456	134371481
chr1	134876467	134880159
chr1	134880840	134882248
chr1	134909013	134910005
chr1	134912305	134912606
chr1	134913366	134918782
chr1	134976040	134977720
chr1	134979330	134981951
chr1	134991420	134991985
chr1	135024044	135024848
chr1	135106148	135106989
chr1	135293483	135294947
chr1	135307999	135308920
chr1	135330520	135330920
chr1	135344922	135346194
chr1	135387702	135391147
chr1	135400319	135401009
chr1	135563374	135563744
chr1	135564888	135568806
chr1	135589714	135593527
chr1	135605968	135607350
chr1	135638661	135639381
chr1	135786900	135787171
chr1	135789511	135790389
chr1	135957129	135958298
chr1	135959244	135961079
chr1	136141024	136141404
chr1	136278097	136278989
chr1	136315396	136315992
chr1	136319521	136322004
chr1	136324686	136324932
chr1	136327622	136328518
chr1	136387519	136389110
chr1	136396771	136400208
chr1	136429162	136433259
chr1	136435687	136438522
chr1	136446070	136447028
chr1	136451555	136453965
chr1	136460444	136460607
chr1	136461948	136462971
chr1	136464013	136465019
chr1	136465784	136467884
chr1	136469590	136469856
chr1	136470627	136471248
chr1	136480186	136480368
chr1	136602816	136603548
chr1	137075444	137080906
chr1	137081943	137084101
chr1	137084930	137085811
chr1	137090213	137091527
chr1	137092359	137092955
chr1	137093685	137096722
chr1	137097840	137098017
chr1	137099852	137102383
chr1	137110768	137111506
chr1	137113186	137115462
chr1	137131362	137131785
chr1	137144906	137146992
chr1	137240531	137240807
chr1	137381720	137382041
chr1	137449071	137452017
chr1	137460079	137462094
chr1	137527459	137531309
chr1	137534987	137535476
chr1	137552602	137553093
chr1	137555003	137557302
chr1	137564577	137565194
chr1	137571812	137575595
chr1	137631019	137632104
chr1	137635753	137636698
chr1	137689692	137691103
chr1	138032531	138037241
chr1	138323275	138324072
chr1	138369513	138370376
chr1	138451744	138452314
chr1	138464003	138464249
chr1	138465087	138470387
chr1	138474038	138475012
chr1	138490466	138491893
chr1	138492781	138493520
chr1	138494219	138495612
chr1	138540909	138541099
chr1	138558267	138558597
chr1	138566509	138583328
chr1	138585767	138586108
chr1	138586929	138588490
chr1	138601216	138601403
chr1	138603301	138605053
chr1	138629097	138630710
chr1	138678158	138679056
chr1	141391494	141393538
chr1	142084633	142085865
chr1	142330222	142330869
chr1	145579012	145579417
chr1	148170374	148171052
chr1	152960162	152960325
chr1	153151576	153153056
chr1	153362809	153365313
chr1	153390527	153393508
chr1	153533037	153533408
chr1	154420000	154421796
chr1	154638037	154638562
chr1	154639905	154641939
chr1	154642593	154643990
chr1	154662042	154662763
chr1	154665114	154665646
chr1	154679253	154680989
chr1	154692311	154693310
chr1	154761063	154761293
chr1	154762188	154765653
chr1	154839097	154840334
chr1	154855144	154856038
chr1	154856708	154859044
chr1	154878368	154879506
chr1	154880318	154881109
chr1	154882361	154883167
chr1	154885205	154885408
chr1	154933378	154933580
chr1	154937108	154946789
chr1	154955115	154957840
chr1	155064494	155064957
chr1	155115314	155116584
chr1	155120770	155120988
chr1	155134917	155135675
chr1	155164236	155164942
chr1	155174854	155175497
chr1	155176576	155176739
chr1	155220590	155222753
chr1	155223577	155224162
chr1	155225199	155226283
chr1	155337321	155337835
chr1	155339042	155342783
chr1	155347170	155347683
chr1	155348833	155349980
chr1	155355879	155356366
chr1	155379120	155380603
chr1	155926161	155928805
chr1	155943454	155943619
chr1	155947474	155947794
chr1	155948589	155948822
chr1	156898960	156899190
chr1	156900539	156900721
chr1	156901425	156902274
chr1	156906189	156907587
chr1	156933308	156934352
chr1	156959341	156959544
chr1	158197766	158197937
chr1	158579087	158579261
chr1	158580790	158581056
chr1	158584951	158588219
chr1	158589287	158592459
chr1	158593355	158594412
chr1	158596014	158600333
chr1	158885882	158887234
chr1	158891831	158892836
chr1	158913052	158914349
chr1	158923643	158928348
chr1	159345638	159346268
chr1	159348033	159348372
chr1	162139186	162139501
chr1	162241593	162242385
chr1	162664650	162665836
chr1	163848220	163850087
chr1	165944489	165945620
chr1	165949930	165951742
chr1	166303355	166308969
chr1	166379976	166380282
chr1	166383339	166383933
chr1	166391917	166392248
chr1	166400930	166401305
chr1	166419129	166420114
chr1	166421231	166421738
chr1	166422893	166426079
chr1	166431467	166434355
chr1	166452815	166452978
chr1	166453709	166453974
chr1	166462491	166462657
chr1	166480988	166481583
chr1	166482508	166483246
chr1	167115008	167115322
chr1	167119362	167119556
chr1	167542914	167544308
chr1	167546008	167546423
chr1	167548100	167548753
chr1	167701602	167701970
chr1	168072694	168074192
chr1	168080576	168083253
chr1	168084464	168085491
chr1	169152898	169154030
chr1	169198550	169205401
chr1	169208735	169212339
chr1	169218316	169220638
chr1	169845119	169846031
chr1	170312656	170313104
chr1	170347113	170347457
chr1	172450988	172452217
chr1	172819763	172820069
chr1	172822107	172822733
chr1	172823440	172823627
chr1	172979292	172980125
chr1	173018122	173020704
chr1	173056110	173056930
chr1	173064404	173064636
chr1	173067287	173067530
chr1	173068198	173069961
chr1	173303527	173304203
chr1	173371994	173372628
chr1	173407951	173408654
chr1	173834526	173835190
chr1	173954180	173954918
chr1	174230485	174233296
chr1	174434512	174435541
chr1	174440442	174441103
chr1	175277994	175279373
chr1	180213152	180214706
chr1	180288077	180288807
chr1	180290057	180290537
chr1	180664316	180664544
chr1	181017652	181018609
chr1	181128496	181129200
chr1	181202910	181203802
chr1	181206344	181207701
chr1	181390802	181391753
chr1	181392628	181392835
chr1	181393946	181394233
chr1	181416847	181417624
chr1	181433470	181434030
chr1	181499483	181499810
chr1	181534197	181534392
chr1	182155847	182157502
chr1	182213788	182214883
chr1	182479391	182479815
chr1	182534561	182537701
chr1	182777806	182779109
chr1	182795145	182795972
chr1	182812451	182812792
chr1	182813974	182814874
chr1	182815653	182820948
chr1	182854420	182856015
chr1	182889066	182889496
chr1	182908553	182911732
chr1	183078282	183078950
chr1	183162359	183162776
chr1	183164001	183165083
chr1	183788487	183793403
chr1	183849217	183849770
chr1	183882726	183883778
chr1	183920219	183920382
chr1	183956989	183964398
chr1	183983116	183983279
chr1	183985216	183986276
chr1	184002213	184003018
chr1	184018790	184021041
chr1	184022438	184022844
chr1	184024733	184025908
chr1	184028944	184029869
chr1	184031893	184034423
chr1	184201139	184203102
chr1	186660159	186660498
chr1	186928295	186930434
chr1	187031777	187035119
chr1	187158584	187159447
chr1	188085947	188086110
chr1	188337297	188338153
chr1	188339040	188339406
chr1	189138236	189138399
chr1	190822126	190824457
chr1	190836316	190838563
chr1	191568801	191569170
chr1	191577569	191580873
chr1	191595010	191595881
chr1	191739771	191741731
chr1	193481475	193481697
chr1	193484477	193487132
chr1	193490210	193490620
chr1	193663437	193663991
chr1	194273043	194274807
chr1	194339056	194340025
chr1	195340017	195341103
chr1	195364962	195365642
chr1	196572371	196573272
chr10	3157646	3158543
chr10	4785269	4785618
chr10	5854245	5855203
chr10	5856025	5857064
chr10	5860785	5861459
chr10	5863339	5864841
chr10	5971949	5973000
chr10	5974668	5974977
chr10	6005739	6006012
chr10	6007271	6007659
chr10	6008344	6008773
chr10	6009459	6010081
chr10	6011779	6014028
chr10	6048423	6049075
chr10	6052399	6054797
chr10	6055577	6063082
chr10	6072697	6073066
chr10	6075979	6076186
chr10	6090825	6098540
chr10	6101854	6105434
chr10	6142225	6142456
chr10	6199644	6204775
chr10	6206736	6207118
chr10	6217581	6220162
chr10	6221512	6222987
chr10	6223768	6224597
chr10	6233951	6236802
chr10	6237554	6240651
chr10	6284610	6286042
chr10	6298587	6298850
chr10	6369521	6370151
chr10	6403216	6406759
chr10	6412834	6412997
chr10	6494788	6494951
chr10	7171832	7173137
chr10	7302001	7302356
chr10	7320229	7320421
chr10	7330888	7331821
chr10	7339162	7340831
chr10	7833842	7835110
chr10	8600538	8601744
chr10	9345045	9345751
chr10	12209563	12210251
chr10	12269892	12271117
chr10	12272168	12274334
chr10	12280495	12280725
chr10	12293181	12293568
chr10	12294563	12294758
chr10	12298376	12299926
chr10	12328134	12330280
chr10	12505056	12505427
chr10	12508958	12509130
chr10	12634453	12635866
chr10	14982808	14983030
chr10	16933129	16933811
chr10	17294133	17295549
chr10	17296849	17299529
chr10	18054064	18054725
chr10	18083528	18083890
chr10	18124519	18124746
chr10	18137520	18138254
chr10	18139314	18139978
chr10	18221778	18221991
chr10	18928105	18928384
chr10	18929107	18929347
chr10	19873191	19873379
chr10	19876683	19876895
chr10	19880772	19881172
chr10	19886748	19887172
chr10	19896075	19896868
chr10	19898120	19898358
chr10	19906276	19907520
chr10	19935828	19936555
chr10	19984393	19985413
chr10	20771112	20771339
chr10	20773137	20776721
chr10	20819638	20822521
chr10	20828134	20831128
chr10	20847506	20848720
chr10	20849749	20850657
chr10	20913579	20913767
chr10	21466583	21467430
chr10	21468421	21468615
chr10	21541163	21541542
chr10	21546493	21551090
chr10	21554341	21554655
chr10	21563359	21570492
chr10	21608591	21608773
chr10	21626786	21626983
chr10	21638041	21640813
chr10	21700816	21703545
chr10	21708964	21709219
chr10	23531600	23534025
chr10	23851863	23853243
chr10	23878397	23879701
chr10	23884608	23884930
chr10	24044916	24045227
chr10	24276917	24277838
chr10	24310723	24311727
chr10	24335281	24336819
chr10	24518457	24518624
chr10	24519845	24520683
chr10	24521372	24522241
chr10	24523283	24527936
chr10	24530507	24531274
chr10	24532025	24532410
chr10	24537718	24538333
chr10	24539861	24540661
chr10	24581825	24585235
chr10	24911473	24912204
chr10	25034080	25034409
chr10	25092051	25093091
chr10	25101514	25104402
chr10	25146702	25147533
chr10	25152178	25152717
chr10	26357730	26358347
chr10	27709869	27711929
chr10	27712634	27716467
chr10	27728313	27729524
chr10	27730308	27731257
chr10	27732100	27734382
chr10	27735160	27735816
chr10	27806018	27806184
chr10	27806893	27807858
chr10	27808647	27809304
chr10	28213465	28213653
chr10	30448766	30450217
chr10	30451372	30451664
chr10	30627460	30627819
chr10	31176912	31177476
chr10	33943494	33943657
chr10	33947410	33950791
chr10	33952101	33954359
chr10	33955515	33956453
chr10	33957849	33958730
chr10	36330047	36330381
chr10	36331193	36332012
chr10	36656285	36657064
chr10	36931811	36932371
chr10	36943039	36944116
chr10	36952028	36952254
chr10	38827012	38827469
chr10	38944299	38945097
chr10	39244875	39246043
chr10	39252035	39252399
chr10	39275374	39275658
chr10	39311973	39312999
chr10	39337632	39338264
chr10	39379333	39380062
chr10	39455631	39456203
chr10	39957143	39957952
chr10	40073631	40074153
chr10	40079039	40079934
chr10	40082026	40084127
chr10	40088741	40088930
chr10	40145224	40146064
chr10	40630307	40631462
chr10	41179400	41181014
chr10	41184098	41184881
chr10	41186794	41187535
chr10	41188355	41188807
chr10	41192895	41193410
chr10	41303000	41303366
chr10	41326552	41328580
chr10	41966217	41966505
chr10	41967219	41968600
chr10	42183571	42185385
chr10	42670877	42671492
chr10	42762320	42763611
chr10	43185632	43188235
chr10	43209032	43210917
chr10	43246259	43248824
chr10	43270084	43272043
chr10	43404336	43404656
chr10	44023838	44024001
chr10	44034880	44035791
chr10	44087056	44087260
chr10	44088127	44091047
chr10	44108436	44111523
chr10	44112627	44114747
chr10	44120137	44120729
chr10	44123626	44124068
chr10	44128913	44130283
chr10	44147888	44148200
chr10	44167342	44167536
chr10	44202886	44203595
chr10	44418464	44419123
chr10	44419861	44420533
chr10	44792548	44793255
chr10	44810543	44812774
chr10	46450694	46451347
chr10	46460659	46460936
chr10	46534482	46535367
chr10	51965294	51966555
chr10	51994306	51996361
chr10	51997378	51999968
chr10	52015731	52015894
chr10	52016938	52018159
chr10	53132550	53132913
chr10	53299853	53301223
chr10	54230769	54231015
chr10	57211741	57211982
chr10	57991425	57994976
chr10	58817259	58818139
chr10	58843218	58843758
chr10	59019241	59019903
chr10	59020770	59023077
chr10	59040370	59041690
chr10	59043843	59044409
chr10	59215948	59216575
chr10	59257601	59258949
chr10	59369413	59374932
chr10	59377875	59380480
chr10	59381437	59386116
chr10	59425252	59429364
chr10	59432648	59433964
chr10	59435914	59437430
chr10	59439371	59439550
chr10	59441572	59442100
chr10	59494479	59494887
chr10	59543813	59544770
chr10	59599259	59600605
chr10	59603893	59604929
chr10	59626400	59630054
chr10	59633256	59633707
chr10	59744599	59745106
chr10	60130802	60132030
chr10	60187818	60191736
chr10	60204441	60206695
chr10	60230954	60232007
chr10	60263497	60264847
chr10	60273342	60279878
chr10	60288925	60290309
chr10	60411245	60412676
chr10	60542781	60544291
chr10	60687646	60688855
chr10	60689686	60689890
chr10	60698498	60701578
chr10	60702835	60705854
chr10	60711608	60712928
chr10	60777622	60779103
chr10	60822285	60823668
chr10	60827300	60827553
chr10	60828348	60831557
chr10	60832680	60839543
chr10	60840261	60841603
chr10	60857258	60857803
chr10	60868624	60869079
chr10	60870760	60874592
chr10	60876124	60876526
chr10	60885762	60887272
chr10	60909586	60910447
chr10	60919204	60920642
chr10	61133091	61134145
chr10	61213166	61213884
chr10	61250318	61251567
chr10	61257583	61258257
chr10	61289339	61293032
chr10	61293847	61295586
chr10	61389026	61394816
chr10	61473200	61473468
chr10	61496720	61496883
chr10	61499746	61501458
chr10	61680054	61681651
chr10	61685653	61686235
chr10	61704097	61705773
chr10	61745344	61747496
chr10	61774664	61774864
chr10	61789457	61790638
chr10	61791919	61794679
chr10	61979664	61980131
chr10	62292643	62293198
chr10	62304283	62305189
chr10	62306014	62306665
chr10	62307392	62308157
chr10	62308947	62310689
chr10	62311520	62311683
chr10	62313925	62314839
chr10	62319743	62319970
chr10	62345396	62345878
chr10	62346660	62350877
chr10	62352030	62363268
chr10	62364178	62367657
chr10	62639560	62641139
chr10	62642081	62642613
chr10	62645270	62646146
chr10	62699461	62699854
chr10	62734296	62734947
chr10	62812804	62813778
chr10	62823850	62824013
chr10	62828223	62830689
chr10	66327160	66327581
chr10	66359846	66360317
chr10	66373821	66377271
chr10	66379746	66380752
chr10	66381537	66382048
chr10	66382823	66386011
chr10	66430787	66431979
chr10	66445941	66446667
chr10	66454569	66454732
chr10	66457244	66458243
chr10	66479299	66480337
chr10	66487659	66489459
chr10	66492088	66492284
chr10	66506427	66506630
chr10	66510862	66511848
chr10	66524077	66525572
chr10	66531888	66532103
chr10	66541836	66542057
chr10	66543976	66545287
chr10	66546054	66547030
chr10	66651973	66652136
chr10	66920833	66922444
chr10	67537093	67537883
chr10	67553705	67554501
chr10	67576407	67576774
chr10	67577762	67578782
chr10	67579974	67581265
chr10	67604672	67606227
chr10	67608181	67609130
chr10	67642579	67644106
chr10	68812537	68813036
chr10	69321756	69322962
chr10	69372658	69373235
chr10	69444571	69444960
chr10	69566008	69566171
chr10	69567792	69568570
chr10	69572466	69573877
chr10	69582207	69584002
chr10	69584707	69584919
chr10	69593285	69596204
chr10	69600833	69601709
chr10	69608228	69608925
chr10	69626663	69626852
chr10	69750420	69751308
chr10	69787589	69788036
chr10	69821618	69835164
chr10	69842412	69842625
chr10	70179786	70180512
chr10	70201971	70202134
chr10	70309492	70310065
chr10	74568221	74568422
chr10	74569905	74570363
chr10	74581904	74582185
chr10	74962759	74963013
chr10	75097024	75103580
chr10	75109025	75115845
chr10	75229458	75230639
chr10	75342536	75346286
chr10	75464856	75465463
chr10	75487986	75488530
chr10	75502020	75502398
chr10	75506318	75508759
chr10	75509624	75510683
chr10	75513843	75514770
chr10	75899233	75900729
chr10	76282425	76282602
chr10	76478775	76479810
chr10	76511145	76511379
chr10	76559863	76560366
chr10	76590765	76591025
chr10	76592960	76597595
chr10	76598841	76601921
chr10	76607109	76609680
chr10	76616593	76616859
chr10	76624503	76624836
chr10	76640979	76641558
chr10	76645630	76646073
chr10	76651055	76665456
chr10	76667374	76668022
chr10	76669016	76670429
chr10	76671552	76672371
chr10	77031644	77037606
chr10	77046673	77047175
chr10	77049693	77054729
chr10	77055415	77056142
chr10	77072560	77074276
chr10	77720806	77721179
chr10	77722053	77724396
chr10	77828499	77831629
chr10	77834502	77835492
chr10	78863086	78863502
chr10	79123893	79125155
chr10	79138016	79139718
chr10	79260061	79260406
chr10	79264749	79265683
chr10	79302837	79304543
chr10	79486400	79492188
chr10	79551505	79552099
chr10	79567899	79569100
chr10	79683848	79684591
chr10	79732734	79732897
chr10	79833943	79834393
chr10	79886090	79887791
chr10	79934640	79935168
chr10	80058393	80059385
chr10	80060942	80061835
chr10	80127212	80130026
chr10	80156429	80160398
chr10	80188236	80189673
chr10	80214366	80215651
chr10	80223522	80223825
chr10	80388561	80390224
chr10	80398039	80406862
chr10	80408068	80416136
chr10	80422296	80427136
chr10	80428548	80429513
chr10	80479681	80479844
chr10	80480813	80482701
chr10	80525336	80525974
chr10	80541958	80547007
chr10	80808983	80809996
chr10	80870775	80880557
chr10	80926474	80930105
chr10	81056801	81057292
chr10	81075426	81076768
chr10	81077708	81080934
chr10	81640745	81641407
chr10	82114923	82115637
chr10	82209825	82210531
chr10	82224053	82224455
chr10	82230642	82232514
chr10	82233588	82235724
chr10	82238584	82241950
chr10	82359880	82363369
chr10	82806637	82807723
chr10	82808619	82809478
chr10	83172075	83175087
chr10	83194481	83194848
chr10	83775423	83775695
chr10	83845758	83846474
chr10	83847535	83847722
chr10	83851007	83851975
chr10	83878882	83883619
chr10	83989265	83991141
chr10	83993412	83994210
chr10	84015970	84018661
chr10	84053657	84054068
chr10	84325971	84326921
chr10	84371946	84375435
chr10	84513066	84513712
chr10	84516334	84517193
chr10	84534844	84535074
chr10	84535735	84536462
chr10	84967885	84969206
chr10	84969939	84971552
chr10	84972509	84973377
chr10	84974932	84975823
chr10	84977128	84978983
chr10	84986645	84991337
chr10	85000660	85005688
chr10	85006432	85009234
chr10	85033548	85035564
chr10	85480309	85482604
chr10	86909775	86910859
chr10	87976351	87977063
chr10	88009559	88011564
chr10	88171042	88172878
chr10	88933413	88934121
chr10	90619208	90619371
chr10	90640289	90641018
chr10	90643153	90645321
chr10	90649665	90651027
chr10	92627783	92629472
chr10	92651215	92651772
chr10	92653376	92653895
chr10	92676015	92677212
chr10	92758919	92761678
chr10	92788751	92789422
chr10	92826033	92829032
chr10	93282568	93283630
chr10	93888844	93889898
chr10	93994442	93994865
chr10	94638179	94639854
chr10	94680555	94682705
chr10	94718876	94719116
chr10	94720441	94721442
chr10	94725206	94725503
chr10	94727105	94727705
chr10	94815907	94816635
chr10	94817288	94818680
chr10	94819492	94821374
chr10	94915680	94916408
chr10	94919810	94920628
chr10	94947730	94948002
chr10	95018600	95019071
chr10	95058249	95058499
chr10	95060497	95061257
chr10	95067680	95068055
chr10	95151646	95152949
chr10	95179850	95180447
chr10	95181236	95182040
chr10	95327479	95327981
chr10	95346169	95347017
chr10	95569513	95570075
chr10	96083642	96085087
chr10	96092359	96095435
chr10	96181653	96185833
chr10	96187520	96187769
chr10	98578584	98580292
chr10	98669739	98670489
chr10	98816512	98816959
chr10	98880406	98880621
chr10	98921965	98925846
chr10	102808876	102809852
chr10	106965126	106965861
chr10	107721097	107727846
chr10	107728530	107733803
chr10	107735156	107737235
chr10	110232917	110233559
chr10	110291178	110291527
chr10	110293424	110296697
chr10	110314931	110317163
chr10	110363119	110363471
chr10	110364505	110364693
chr10	110365865	110367321
chr10	110368054	110369735
chr10	110846710	110847006
chr10	110859077	110859781
chr10	110870793	110871208
chr10	111010516	111013693
chr10	115997540	115998030
chr10	115999590	116000194
chr10	116245130	116246655
chr10	116367717	116368665
chr10	116610765	116612145
chr10	116847876	116849781
chr10	117101092	117101355
chr10	117134420	117134827
chr10	117153842	117155986
chr10	117241374	117248470
chr10	117328058	117328907
chr10	117351883	117352502
chr10	117388359	117391335
chr10	117392031	117392583
chr10	117482609	117483366
chr10	119105043	119105279
chr10	119415483	119415703
chr10	119604681	119606907
chr10	119607661	119611439
chr10	120849901	120850286
chr10	120855626	120857773
chr10	120858455	120859456
chr10	120860949	120861506
chr10	120864942	120865809
chr10	120866736	120868448
chr10	120894579	120895848
chr10	120935329	120935851
chr10	120937575	120938881
chr10	120947157	120948370
chr10	121336476	121337210
chr10	126364138	126366131
chr10	126400760	126401404
chr10	126407849	126411224
chr10	126419468	126426508
chr10	126427216	126427489
chr10	126662245	126662935
chr10	126667649	126669391
chr10	126705478	126706381
chr10	126707081	126712191
chr10	126773030	126774172
chr10	126775043	126775394
chr10	126863116	126863866
chr10	126995207	126995501
chr10	126998927	127001551
chr10	127026684	127029589
chr10	127089939	127090939
chr10	127182566	127185118
chr10	127315371	127315895
chr10	127330658	127330932
chr10	127343600	127344561
chr10	127540034	127540230
chr10	127569343	127570056
chr10	127576506	127579813
chr10	127582415	127584743
chr10	127585925	127587252
chr10	127607478	127608350
chr10	127609050	127610176
chr10	127621718	127625493
chr10	127683236	127685826
chr10	127810012	127811021
chr10	127953224	127953547
chr10	127954365	127954776
chr10	127973192	127973826
chr10	128020404	128022256
chr10	128068919	128069870
chr10	128129708	128129892
chr10	128135639	128137129
chr10	128147701	128149671
chr10	128173848	128175161
chr10	128175867	128176116
chr10	128325861	128326609
chr10	128337394	128338245
chr10	129730645	129731343
chr11	3046952	3047632
chr11	3195657	3196108
chr11	3221544	3221725
chr11	3266281	3267024
chr11	3274881	3275044
chr11	3285241	3285503
chr11	3286447	3287218
chr11	3289877	3293108
chr11	3326380	3326698
chr11	3328825	3329026
chr11	3446004	3451248
chr11	3718281	3718798
chr11	3733922	3735211
chr11	3855523	3856544
chr11	4123596	4123983
chr11	4145381	4147855
chr11	4201976	4203466
chr11	4362039	4362275
chr11	4363218	4366780
chr11	4522874	4524048
chr11	4542585	4543350
chr11	4544129	4545206
chr11	4589106	4589837
chr11	4671490	4671923
chr11	4702048	4705064
chr11	4705814	4708538
chr11	4754473	4755693
chr11	4760073	4763235
chr11	4799693	4800211
chr11	4949996	4950238
chr11	4951764	4952501
chr11	4954234	4954890
chr11	5223961	5225599
chr11	5398060	5400247
chr11	5401170	5401472
chr11	5402482	5403138
chr11	5412431	5412703
chr11	5591990	5594589
chr11	5600781	5605254
chr11	5801645	5802547
chr11	5842106	5843967
chr11	5935416	5935623
chr11	5938756	5939515
chr11	6023469	6024398
chr11	6053310	6055320
chr11	6077940	6081975
chr11	6264924	6268461
chr11	6303105	6306784
chr11	6309507	6311665
chr11	6386966	6388036
chr11	6793163	6796433
chr11	7322558	7324655
chr11	7339427	7339615
chr11	8464441	8477005
chr11	8478073	8478816
chr11	8479650	8480094
chr11	8481851	8482892
chr11	8483573	8492848
chr11	8495838	8498460
chr11	8499942	8502055
chr11	8502733	8505679
chr11	8514888	8516157
chr11	8523401	8527552
chr11	8531777	8532884
chr11	8534300	8542098
chr11	8551505	8552615
chr11	8556618	8557247
chr11	8558550	8561113
chr11	8570753	8572480
chr11	8588930	8589590
chr11	8592488	8594823
chr11	8654023	8655094
chr11	9022925	9023546
chr11	9024761	9026966
chr11	9952411	9952584
chr11	10999230	10999732
chr11	11778363	11782664
chr11	12358247	12358789
chr11	12359775	12360615
chr11	12368855	12369259
chr11	12370023	12370555
chr11	12903752	12905416
chr11	12909649	12909917
chr11	16398347	16399360
chr11	18857734	18858624
chr11	19728434	19731034
chr11	19747517	19751675
chr11	19816850	19821064
chr11	19847741	19848580
chr11	19852999	19853238
chr11	19862731	19866090
chr11	19870419	19870772
chr11	19882888	19889936
chr11	19891362	19891710
chr11	19892412	19893128
chr11	19926141	19926858
chr11	19941294	19942062
chr11	19964692	19965156
chr11	20033173	20033940
chr11	20036817	20043597
chr11	20044304	20049083
chr11	20052015	20053763
chr11	20058587	20058809
chr11	20063434	20067574
chr11	20073310	20073633
chr11	20108317	20108480
chr11	20125621	20126215
chr11	20128250	20134809
chr11	20144731	20145671
chr11	20147183	20147346
chr11	20220529	20222672
chr11	20228431	20228687
chr11	20295758	20297397
chr11	20300038	20300973
chr11	20362752	20364292
chr11	20368417	20369906
chr11	20485945	20486796
chr11	20539907	20540076
chr11	20560783	20561218
chr11	20561898	20562147
chr11	21152623	21153342
chr11	21156363	21157058
chr11	21158632	21159396
chr11	21161122	21162195
chr11	21872103	21872384
chr11	22463442	22463622
chr11	22488074	22489166
chr11	22499599	22500820
chr11	22501490	22503073
chr11	22503739	22504778
chr11	22505521	22512401
chr11	22691706	22692842
chr11	22698249	22701083
chr11	22729140	22733530
chr11	22739468	22740193
chr11	22740938	22741101
chr11	22742472	22744422
chr11	22745518	22746766
chr11	22748018	22748886
chr11	22750059	22751233
chr11	22752304	22755060
chr11	22849346	22850341
chr11	22967526	22968450
chr11	22979219	22979535
chr11	22980511	22981902
chr11	23020761	23021348
chr11	23412132	23412416
chr11	23701068	23702030
chr11	23702758	23703560
chr11	25997967	25999098
chr11	26027419	26029291
chr11	29496101	29496693
chr11	29536921	29537767
chr11	29570941	29571118
chr11	29612125	29612774
chr11	29648845	29649009
chr11	30059568	30059840
chr11	30061150	30061943
chr11	30063234	30063500
chr11	30076526	30077861
chr11	30082972	30084402
chr11	30086905	30087190
chr11	30191170	30191407
chr11	30390359	30391163
chr11	30648924	30651229
chr11	30652144	30652749
chr11	30685002	30685477
chr11	30698904	30699127
chr11	31644034	31646108
chr11	32117848	32119107
chr11	32579975	32580165
chr11	32581805	32582471
chr11	32604360	32604560
chr11	33426455	33427758
chr11	33428763	33431852
chr11	33432974	33439453
chr11	33441019	33441326
chr11	33442111	33442746
chr11	33443591	33444267
chr11	33448972	33450045
chr11	33832356	33832661
chr11	34611330	34612133
chr11	35199269	35203307
chr11	35232001	35233273
chr11	35337095	35338559
chr11	35651527	35654126
chr11	35655122	35655914
chr11	35657640	35658203
chr11	35706641	35707539
chr11	35761564	35761770
chr11	35788398	35788643
chr11	36360601	36363449
chr11	36366434	36366744
chr11	41922710	41922873
chr11	41923783	41923963
chr11	43353497	43354459
chr11	43445894	43448966
chr11	43466117	43469035
chr11	43513971	43514687
chr11	43555839	43556469
chr11	43565690	43566587
chr11	44519462	44520007
chr11	44521051	44522073
chr11	44560862	44561110
chr11	44677461	44677944
chr11	45698291	45699518
chr11	45854981	45855334
chr11	45873490	45874300
chr11	45876626	45877176
chr11	45878228	45883862
chr11	45884540	45885487
chr11	45900304	45901646
chr11	45903576	45904977
chr11	45908470	45909726
chr11	45926259	45930241
chr11	45931118	45933927
chr11	45934896	45936290
chr11	46068107	46068683
chr11	47453027	47453428
chr11	49472382	49473391
chr11	49577744	49579461
chr11	49617455	49620027
chr11	49622018	49622864
chr11	49626031	49626313
chr11	49631998	49632273
chr11	49634052	49634995
chr11	49951827	49952114
chr11	49952813	49954027
chr11	50002046	50002557
chr11	50029074	50030763
chr11	50065102	50067856
chr11	50184440	50185313
chr11	50203919	50205529
chr11	51428038	51429718
chr11	51453931	51454890
chr11	51516444	51517407
chr11	51635700	51637010
chr11	51820892	51821055
chr11	51821749	51822051
chr11	52037409	52038370
chr11	52085365	52087164
chr11	52088183	52089378
chr11	52164662	52165389
chr11	52177478	52177789
chr11	52178554	52178993
chr11	52179887	52180605
chr11	52181890	52185315
chr11	52200183	52201927
chr11	52203149	52204320
chr11	53070873	53074735
chr11	53133344	53133507
chr11	53562973	53563776
chr11	53571010	53579598
chr11	53587192	53592182
chr11	53607262	53610669
chr11	53611523	53615361
chr11	53616102	53617021
chr11	53619235	53620003
chr11	53685422	53686233
chr11	53717738	53718282
chr11	54557920	54558695
chr11	54658047	54659462
chr11	54696529	54696692
chr11	54746226	54754866
chr11	54756120	54758748
chr11	54764384	54766464
chr11	54785386	54790164
chr11	54790871	54791546
chr11	54827293	54827909
chr11	54836314	54837733
chr11	54838929	54841422
chr11	54944311	54945173
chr11	55133796	55139291
chr11	55140673	55141440
chr11	55223222	55224493
chr11	55236635	55237701
chr11	55243789	55244626
chr11	55251565	55251967
chr11	55254965	55255506
chr11	55256920	55257955
chr11	55758946	55759132
chr11	55759853	55762689
chr11	55770495	55772110
chr11	57365489	57367587
chr11	57396968	57398090
chr11	57467371	57467567
chr11	57605346	57605595
chr11	57611850	57612040
chr11	57770875	57771058
chr11	57774496	57775006
chr11	57784525	57785887
chr11	57797050	57798601
chr11	57906090	57907416
chr11	58024450	58024633
chr11	59057462	59058481
chr11	59272649	59272950
chr11	59324363	59326641
chr11	59333755	59334399
chr11	59629291	59630585
chr11	59698259	59699473
chr11	59705615	59705953
chr11	59706808	59707954
chr11	59709189	59709480
chr11	59721631	59722028
chr11	59926611	59929321
chr11	59973593	59977020
chr11	60019256	60020968
chr11	60062634	60062889
chr11	60106896	60109940
chr11	60111786	60111993
chr11	60114203	60114367
chr11	60147118	60148009
chr11	60179570	60180942
chr11	60250977	60252987
chr11	60254796	60256152
chr11	60256889	60258951
chr11	60553026	60556681
chr11	60654912	60655330
chr11	60657355	60658451
chr11	60676992	60678751
chr11	60729888	60730600
chr11	60731476	60731822
chr11	60733227	60741725
chr11	60788934	60790889
chr11	60817033	60819237
chr11	60819937	60820180
chr11	61065161	61065658
chr11	61175213	61175555
chr11	61176237	61176413
chr11	61352791	61353221
chr11	61357551	61357923
chr11	62239793	62240000
chr11	62243483	62244115
chr11	62245894	62247173
chr11	62301171	62301489
chr11	62302241	62304659
chr11	62305663	62310896
chr11	62311877	62313136
chr11	62315447	62317568
chr11	62322671	62324471
chr11	62325145	62328195
chr11	62456758	62457214
chr11	63080659	63081044
chr11	63081730	63083099
chr11	63083798	63086400
chr11	63268241	63270844
chr11	63711177	63714255
chr11	63765221	63767336
chr11	63769059	63771302
chr11	63790980	63791655
chr11	63813329	63814863
chr11	64810291	64812181
chr11	64923210	64924134
chr11	64924788	64925427
chr11	64939693	64940366
chr11	66732077	66738150
chr11	66743020	66745290
chr11	66746756	66747675
chr11	66748420	66748645
chr11	66796444	66798531
chr11	66821086	66827850
chr11	66828728	66832961
chr11	66833843	66835142
chr11	66855380	66856921
chr11	66858697	66862533
chr11	67159031	67159813
chr11	67192549	67193802
chr11	67740144	67741805
chr11	68775026	68775795
chr11	68887751	68887991
chr11	68891119	68892062
chr11	69266097	69266786
chr11	69284181	69284465
chr11	69285236	69285696
chr11	69376432	69377919
chr11	69412887	69414956
chr11	69427164	69427349
chr11	69464017	69465047
chr11	69512334	69525490
chr11	69526474	69529146
chr11	69597806	69598976
chr11	70391234	70391859
chr11	70774355	70774518
chr11	70777907	70778813
chr11	71576087	71580462
chr11	71582981	71583537
chr11	71585537	71589437
chr11	72099946	72102695
chr11	72214766	72216910
chr11	72234680	72235258
chr11	72380417	72380644
chr11	72382922	72384065
chr11	72389293	72392311
chr11	72453103	72453366
chr11	72454318	72454842
chr11	72754119	72754440
chr11	72767187	72767824
chr11	72957464	72958246
chr11	72959232	72962001
chr11	72981278	72982812
chr11	74361957	74362510
chr11	74364135	74365199
chr11	74368309	74370019
chr11	74384991	74386504
chr11	74398842	74399007
chr11	74436611	74437688
chr11	74441508	74442850
chr11	74520094	74520772
chr11	74524666	74524829
chr11	74562614	74563566
chr11	74576449	74578038
chr11	74653690	74653952
chr11	75059062	75059654
chr11	75060517	75061003
chr11	75365626	75365872
chr11	75418426	75419628
chr11	75432565	75438280
chr11	75439069	75439553
chr11	75550239	75551872
chr11	75561124	75561374
chr11	76099133	76102806
chr11	76104008	76104866
chr11	76105546	76109675
chr11	76115631	76116441
chr11	76123057	76123479
chr11	76130500	76131372
chr11	76132602	76134491
chr11	76135417	76137901
chr11	76161952	76162237
chr11	76162990	76168084
chr11	76173929	76174460
chr11	76176671	76177818
chr11	76179889	76180727
chr11	76269780	76270781
chr11	76290048	76291415
chr11	76295870	76297987
chr11	76312813	76313313
chr11	76344991	76345810
chr11	76426366	76426643
chr11	76427573	76428115
chr11	76435459	76438474
chr11	77260404	77260569
chr11	77309252	77314521
chr11	77316144	77320369
chr11	77486320	77486551
chr11	77493085	77493602
chr11	77494685	77494954
chr11	77551094	77554866
chr11	77560320	77560848
chr11	77596672	77600368
chr11	77601312	77601995
chr11	77603876	77607237
chr11	77619071	77623334
chr11	77689216	77691095
chr11	77696581	77701390
chr11	77702188	77702567
chr11	77710629	77711183
chr11	77716503	77721255
chr11	77727761	77731398
chr11	77959118	77960175
chr11	77984095	77986711
chr11	78260756	78260992
chr11	78815632	78817938
chr11	78902768	78903171
chr11	78905156	78912263
chr11	78942470	78943227
chr11	79100087	79100280
chr11	79137751	79138059
chr11	79140463	79141198
chr11	79241614	79242005
chr11	79447890	79449804
chr11	79451669	79452006
chr11	79454441	79455216
chr11	79456830	79457596
chr11	79458601	79461831
chr11	79473747	79474667
chr11	79485047	79485766
chr11	79565497	79565951
chr11	79566810	79567028
chr11	79786630	79788188
chr11	79793906	79794092
chr11	79884354	79884572
chr11	79943981	79947366
chr11	79994196	79994691
chr11	80100152	80100816
chr11	80946330	80949097
chr11	81425745	81427713
chr11	81429310	81430333
chr11	82635863	82637700
chr11	82649508	82649671
chr11	82658790	82659813
chr11	83308954	83309137
chr11	84510712	84511180
chr11	84657698	84658502
chr11	84660732	84660985
chr11	85054499	85055082
chr11	85056529	85057247
chr11	85061461	85061739
chr11	85069187	85069350
chr11	85527488	85528538
chr11	85713236	85713973
chr11	86250077	86250321
chr11	86392508	86393049
chr11	86400891	86401054
chr11	86647245	86649989
chr11	86782235	86783551
chr11	86787372	86788126
chr11	86802899	86803062
chr11	87256227	87256399
chr11	87261613	87261791
chr11	87778885	87780817
chr11	87828933	87829752
chr11	87840568	87842495
chr11	87843749	87845531
chr11	87853312	87853479
chr11	87931792	87932892
chr11	87937045	87937718
chr11	87945266	87945941
chr11	87952513	87954660
chr11	87985611	87987506
chr11	88189544	88189870
chr11	88191151	88194782
chr11	88214214	88221220
chr11	88227590	88228773
chr11	88294816	88295321
chr11	88310943	88312453
chr11	88329049	88329730
chr11	88330633	88330963
chr11	88352024	88353057
chr11	88353756	88353952
chr11	88356941	88358174
chr11	88360711	88361374
chr11	88362046	88365631
chr11	88368381	88375234
chr11	88378424	88378646
chr11	88394543	88399383
chr11	88404418	88404651
chr11	88460057	88461387
chr11	88462100	88463567
chr11	88465323	88465901
chr11	88487933	88493052
chr11	88516045	88519705
chr11	88520899	88524415
chr11	88526750	88528458
chr11	88529523	88533238
chr11	88548376	88552460
chr11	88553820	88553983
chr11	88554690	88554853
chr11	88557438	88558155
chr11	88680810	88681055
chr11	88700634	88702898
chr11	88703878	88707159
chr11	88709586	88710462
chr11	88758527	88759942
chr11	88790406	88796238
chr11	88797624	88799594
chr11	88801973	88803163
chr11	88803908	88804483
chr11	88854480	88856194
chr11	88857099	88858024
chr11	88865105	88866304
chr11	88877734	88877897
chr11	88881378	88884086
chr11	88889355	88889741
chr11	88891402	88891752
chr11	88966670	88967225
chr11	89103389	89104618
chr11	93813804	93814771
chr11	93909181	93909446
chr11	93994369	94003149
chr11	94007332	94008567
chr11	94010359	94012998
chr11	94014745	94015157
chr11	94019745	94025322
chr11	94040915	94041103
chr11	94126042	94127076
chr11	94493472	94494936
chr11	94495604	94496129
chr11	94818879	94820843
chr11	94825409	94825751
chr11	95092832	95093215
chr11	95127032	95128444
chr11	95134482	95137050
chr11	95381635	95382220
chr11	95400025	95400501
chr11	95401206	95403040
chr11	95404117	95408085
chr11	95441688	95442344
chr11	95461475	95461909
chr11	95471406	95471689
chr11	95479106	95480376
chr11	95481324	95484628
chr11	95563838	95566054
chr11	95566856	95567645
chr11	95568417	95569834
chr11	95576955	95578347
chr11	95634008	95635103
chr11	95638932	95639395
chr11	95666243	95667395
chr11	95771885	95773597
chr11	95785722	95786134
chr11	95820641	95821386
chr11	95822252	95825882
chr11	95842539	95845329
chr11	95849337	95850679
chr11	95877448	95881053
chr11	95881928	95882768
chr11	95911432	95911717
chr11	95912566	95912729
chr11	95985808	95986109
chr11	95990610	95992454
chr11	96557734	96559192
chr11	96573568	96576249
chr11	96758852	96759646
chr11	96764106	96764820
chr11	96792871	96793363
chr11	96807498	96808273
chr11	96812770	96819393
chr11	96824253	96825278
chr11	96826149	96826854
chr11	96829697	96831568
chr11	96833230	96833893
chr11	96946062	96946488
chr11	97136937	97137493
chr11	97146858	97151560
chr11	97153292	97154537
chr11	97162554	97165232
chr11	97167826	97169336
chr11	97183672	97183905
chr11	97194358	97195218
chr11	97253236	97253476
chr11	97268835	97269589
chr11	97270735	97270987
chr11	97288946	97289807
chr11	97292820	97294558
chr11	97296099	97298301
chr11	97298999	97300443
chr11	97331183	97333865
chr11	97346308	97346848
chr11	97361541	97362573
chr11	97363733	97364251
chr11	97364918	97365138
chr11	97418031	97418194
chr11	97429975	97431862
chr11	97440947	97441180
chr11	97463647	97464533
chr11	97478556	97478810
chr11	97479672	97479981
chr11	97486226	97486895
chr11	97496899	97497895
chr11	97601502	97601756
chr11	97649383	97649611
chr11	97664724	97675668
chr11	97676711	97681515
chr11	97682180	97683285
chr11	97686531	97688341
chr11	97689000	97689621
chr11	97690602	97692376
chr11	97693141	97693520
chr11	97767043	97767656
chr11	97772335	97772513
chr11	97777201	97778369
chr11	97794774	97795401
chr11	97807483	97812639
chr11	97817676	97821357
chr11	97838991	97839628
chr11	97864294	97867408
chr11	97873060	97874587
chr11	98048471	98049317
chr11	98060648	98061178
chr11	98158260	98161446
chr11	98537495	98537672
chr11	98650218	98650854
chr11	98720384	98720577
chr11	98752629	98754394
chr11	98763615	98766522
chr11	98785431	98788185
chr11	98810823	98818477
chr11	98829393	98830319
chr11	98992680	98996916
chr11	99003141	99004071
chr11	100059941	100060397
chr11	100135028	100140326
chr11	100145017	100147259
chr11	100176783	100178363
chr11	100233618	100234402
chr11	100235360	100241071
chr11	100245801	100254119
chr11	100273075	100273263
chr11	100295913	100296591
chr11	100354393	100356121
chr11	100362506	100363140
chr11	100366119	100366663
chr11	100386493	100386855
chr11	100395127	100395290
chr11	100396422	100396610
chr11	100420350	100420513
chr11	100421361	100421614
chr11	100471667	100471830
chr11	100478878	100479101
chr11	100542411	100544389
chr11	100583452	100583975
chr11	100586204	100586940
chr11	100606979	100607199
chr11	100642974	100645135
chr11	100796595	100797004
chr11	100860197	100861561
chr11	100924278	100925440
chr11	101004936	101005431
chr11	101090474	101091209
chr11	101092272	101093085
chr11	101094749	101096253
chr11	101195068	101197105
chr11	101313047	101313214
chr11	101320331	101322016
chr11	101340449	101340818
chr11	101341896	101342101
chr11	101409294	101409852
chr11	101450175	101452103
chr11	101465887	101466165
chr11	101479747	101479932
chr11	101502285	101502746
chr11	101507232	101507905
chr11	101519136	101520530
chr11	101541950	101542448
chr11	101556575	101559418
chr11	101632580	101634197
chr11	101639533	101639901
chr11	101757731	101759360
chr11	101785528	101789867
chr11	101995466	101996758
chr11	102183426	102185874
chr11	102188628	102190535
chr11	102191214	102193186
chr11	102193924	102197708
chr11	102199372	102200944
chr11	102203656	102204605
[truncated: 8,628 more rows]
