# Supplementary material for: YY1 and CTCF orchestrate a 3D chromatin looping switch during early neural lineage commitment
Source: HighWire-hosted journal article supplement (doi:10.1101/gr.215160.116), 2017-05-23
Supplement: Supplemental_Table_S15.xlsx [file Supplemental_Table_S15.xlsx]

## Sheet: NPC_Enhancer_MTD_160712_Galaxy1
Beagan et al. 2017
Table S15, NPC Enhancer Annotations
#chr	start	end
chr1	4960095	4961418
chr1	5012688	5014469
chr1	5211084	5211260
chr1	6795377	6795528
chr1	7129212	7129857
chr1	9553725	9555399
chr1	9556170	9556635
chr1	9559976	9560109
chr1	9616775	9618652
chr1	9629138	9629310
chr1	14098527	14099463
chr1	14170974	14172147
chr1	14208804	14209008
chr1	14281727	14282325
chr1	16531024	16531157
chr1	20896385	20896653
chr1	20998526	20999343
chr1	21042717	21043949
chr1	21401519	21401910
chr1	21794252	21794546
chr1	21795443	21796102
chr1	21819628	21820942
chr1	23262732	23264419
chr1	24237439	24237775
chr1	25065720	25065853
chr1	25835761	25836287
chr1	25949031	25950072
chr1	33996241	33997945
chr1	34197709	34198238
chr1	34207099	34207530
chr1	34239408	34239689
chr1	34240247	34240405
chr1	34720567	34724138
chr1	34752994	34754252
chr1	35525995	35526748
chr1	36087097	36087878
chr1	36121727	36121889
chr1	36320952	36321085
chr1	36549078	36549598
chr1	36637664	36637999
chr1	36644819	36646975
chr1	36652187	36653860
chr1	36659936	36660802
chr1	36663765	36664389
chr1	36704482	36704968
chr1	36978535	36978739
chr1	37006447	37007182
chr1	37053160	37054648
chr1	37404258	37404422
chr1	37407148	37408425
chr1	37568959	37570287
chr1	37642842	37643031
chr1	38364836	38364997
chr1	38892492	38893425
chr1	38904852	38904991
chr1	39758003	39758331
chr1	39767229	39768312
chr1	39770016	39772361
chr1	39791346	39791781
chr1	39792446	39793726
chr1	39798139	39798485
chr1	39803391	39803660
chr1	39806220	39807122
chr1	39814912	39816724
chr1	39818004	39819418
chr1	39829272	39829591
chr1	39895412	39895611
chr1	39896166	39896472
chr1	39962986	39963152
chr1	39974892	39975160
chr1	39978422	39979090
chr1	39979819	39980652
chr1	39982161	39982314
chr1	39987817	39988725
chr1	39989534	39989856
chr1	39990478	39991268
chr1	39991978	39994552
chr1	39995856	39996464
chr1	39997916	40000091
chr1	40000630	40000763
chr1	40001395	40001610
chr1	40003282	40005507
chr1	40033967	40034974
chr1	40036335	40036706
chr1	41214587	41214764
chr1	41662553	41663067
chr1	42286764	42287054
chr1	42584663	42584796
chr1	42595271	42597813
chr1	42740976	42745659
chr1	42760047	42761373
chr1	42762059	42762749
chr1	42767933	42771448
chr1	43373665	43374549
chr1	43415473	43415668
chr1	43417368	43417938
chr1	43530974	43532006
chr1	43640752	43641186
chr1	43751718	43752391
chr1	43755837	43756343
chr1	51171461	51172144
chr1	51273244	51273598
chr1	52053301	52054478
chr1	52100440	52100604
chr1	52170254	52170686
chr1	52653895	52655975
chr1	52771356	52771489
chr1	52774809	52775421
chr1	52877508	52877653
chr1	53997472	53997775
chr1	54642032	54642403
chr1	54771922	54772650
chr1	55216289	55219232
chr1	55249896	55250392
chr1	55277925	55278359
chr1	55675236	55676253
chr1	57281446	57281717
chr1	57443484	57446189
chr1	57691173	57691319
chr1	58361327	58361462
chr1	59479358	59480742
chr1	59515873	59516361
chr1	59581248	59581517
chr1	59598327	59598549
chr1	59845602	59846567
chr1	60882737	60882937
chr1	61255478	61256364
chr1	61290661	61291037
chr1	61366780	61367293
chr1	62291222	62291381
chr1	62625583	62625717
chr1	62711403	62711713
chr1	62829906	62830567
chr1	62980933	62981079
chr1	62998179	62998401
chr1	63809766	63810918
chr1	63865964	63867504
chr1	63981083	63982082
chr1	64189856	64190323
chr1	64236085	64236967
chr1	64238200	64238361
chr1	64241718	64243464
chr1	64245660	64247399
chr1	64270567	64271110
chr1	64342133	64342817
chr1	64349260	64349621
chr1	64350696	64353140
chr1	64492059	64492925
chr1	64584417	64584550
chr1	64701661	64702202
chr1	64705257	64705848
chr1	64837851	64839277
chr1	64841532	64842564
chr1	64885697	64886351
chr1	64899885	64901076
chr1	66233349	66234105
chr1	66274661	66275129
chr1	66299159	66299302
chr1	66684468	66684631
chr1	66739046	66739873
chr1	67096431	67096671
chr1	67444688	67445134
chr1	69008021	69008613
chr1	69505422	69505676
chr1	69638137	69638374
chr1	70521820	70523061
chr1	72261158	72261300
chr1	72411076	72411417
chr1	72766810	72767375
chr1	72785449	72786688
chr1	72797722	72798358
chr1	72873094	72875032
chr1	72875989	72876512
chr1	72879095	72880110
chr1	72882009	72882204
chr1	72900666	72901122
chr1	73585319	73585775
chr1	73687146	73690407
chr1	73790620	73791077
chr1	73866991	73867492
chr1	73871015	73871635
chr1	73872831	73873495
chr1	73875558	73876331
chr1	73896818	73897623
chr1	74001549	74002558
chr1	74008782	74010578
chr1	74025907	74026189
chr1	74074306	74074555
chr1	74077573	74077915
chr1	74144851	74145588
chr1	74157732	74158255
chr1	74336476	74337288
chr1	74340202	74343421
chr1	74343989	74344160
chr1	74345091	74346051
chr1	74386572	74387338
chr1	74389598	74390185
chr1	74443670	74444618
chr1	74466019	74466233
chr1	75244363	75245417
chr1	75439369	75440035
chr1	78645440	78646137
chr1	78722295	78722521
chr1	78741623	78742350
chr1	78757489	78758133
chr1	78815598	78817221
chr1	78817831	78818634
chr1	78848925	78849596
chr1	79707878	79708157
chr1	79803765	79803958
chr1	79819784	79821360
chr1	79829013	79830306
chr1	79914134	79914519
chr1	80015059	80015884
chr1	80087639	80087960
chr1	80217711	80218504
chr1	80221355	80222198
chr1	80235251	80235384
chr1	80705001	80707812
chr1	81277652	81277822
chr1	82146975	82147813
chr1	82186080	82186712
chr1	82196126	82196625
chr1	82278908	82281392
chr1	82355525	82355726
chr1	82381459	82382866
chr1	83902987	83904442
chr1	84151422	84153195
chr1	84383188	84384360
chr1	84439725	84440153
chr1	84460757	84461195
chr1	84581944	84582415
chr1	87718637	87719387
chr1	87793537	87793673
chr1	87798338	87799033
chr1	87813396	87813635
chr1	87817856	87820050
chr1	87829468	87831403
chr1	87865476	87866171
chr1	87878061	87879312
chr1	87927986	87930124
chr1	87949542	87950884
chr1	87951737	87951936
chr1	88330058	88332523
chr1	88337022	88340202
chr1	88383529	88384757
chr1	88387550	88388153
chr1	88397866	88398066
chr1	88399954	88403444
chr1	88405936	88408172
chr1	88418740	88419596
chr1	88919922	88920530
chr1	88932266	88933103
chr1	89169228	89170866
chr1	89354423	89355064
chr1	89504045	89504416
chr1	89743046	89744526
chr1	89775944	89777090
chr1	89788242	89788516
chr1	89789112	89789506
chr1	90435719	90436518
chr1	90519841	90520014
chr1	90553828	90555599
chr1	90604391	90604847
chr1	90736113	90737346
chr1	90820811	90821155
chr1	90833252	90833820
chr1	90989131	90989305
chr1	91032201	91034631
chr1	91296875	91297910
chr1	91317169	91318424
chr1	91321081	91321376
chr1	91406446	91406600
chr1	91414102	91414934
chr1	91473344	91473841
chr1	91476820	91477905
chr1	91540584	91541061
chr1	91553031	91553598
chr1	91604810	91605854
chr1	91682774	91683395
chr1	91757371	91757558
chr1	91767228	91767538
chr1	91773439	91773781
chr1	91788416	91789171
chr1	92175424	92176599
chr1	92185230	92187250
chr1	92187948	92188131
chr1	92401546	92401699
chr1	92672099	92672794
chr1	92869710	92870370
chr1	92870914	92873032
chr1	92934391	92936491
chr1	92958971	92959775
chr1	92960416	92962445
chr1	93097881	93098038
chr1	93101772	93109148
chr1	93112684	93113752
chr1	93332149	93333483
chr1	93421695	93422835
chr1	93457629	93457827
chr1	93459690	93460697
chr1	93800059	93800588
chr1	93958259	93958392
chr1	93972412	93972584
chr1	93995111	93997698
chr1	94027023	94027579
chr1	94034191	94034383
chr1	94092034	94092736
chr1	94108519	94109370
chr1	94111656	94113575
chr1	94334279	94335306
chr1	94531615	94532082
chr1	94683791	94684163
chr1	94981724	94982365
chr1	95103940	95104761
chr1	95106275	95107287
chr1	95107831	95108711
chr1	95116902	95118014
chr1	95123129	95124465
chr1	95591690	95592007
chr1	97164594	97165333
chr1	99436996	99437406
chr1	99449742	99451373
chr1	99759464	99759949
chr1	106733871	106736449
chr1	106744263	106744837
chr1	106745565	106745777
chr1	107802736	107803117
chr1	107804848	107805250
chr1	107890190	107890697
chr1	107940020	107940154
chr1	108051291	108052865
chr1	108095102	108097599
chr1	108128945	108129488
chr1	108137991	108138492
chr1	108549113	108550585
chr1	115254535	115254728
chr1	120190768	120192319
chr1	120378210	120378633
chr1	120873364	120873632
chr1	120878984	120879353
chr1	120929918	120931158
chr1	120946676	120947076
chr1	121093979	121094180
chr1	121151590	121153851
chr1	121156034	121156167
chr1	121285531	121286558
chr1	121388744	121388888
chr1	121430067	121430583
chr1	121775118	121776413
chr1	122011468	122014230
chr1	122142294	122142804
chr1	122993063	122993947
chr1	123211154	123212290
chr1	123348640	123349822
chr1	127920788	127921771
chr1	128381465	128381693
chr1	128556555	128558074
chr1	128577884	128578710
chr1	128579417	128581686
chr1	128634579	128635029
chr1	128762247	128762722
chr1	128821941	128822600
chr1	129136370	129137167
chr1	129244961	129245189
chr1	129321813	129321972
chr1	129872609	129872924
chr1	129979360	129979791
chr1	130301335	130301483
chr1	130368787	130369369
chr1	130685977	130686762
chr1	132949610	132949877
chr1	132959319	132960350
chr1	132970737	132971539
chr1	132975034	132976025
chr1	133013236	133013428
chr1	133274566	133275435
chr1	133275974	133277398
chr1	133328506	133328639
chr1	133357405	133358093
chr1	133369984	133370904
chr1	133379062	133380877
chr1	133385789	133386459
chr1	133389057	133389707
chr1	133409832	133411621
chr1	133418510	133418808
chr1	133451556	133451797
chr1	133648431	133648564
chr1	134097372	134098292
chr1	134215128	134215403
chr1	134216079	134216375
chr1	134267071	134267685
chr1	134268304	134268444
chr1	134271836	134272569
chr1	134662967	134663119
chr1	134817553	134817966
chr1	134917156	134917318
chr1	134929645	134930443
chr1	134964764	134966656
chr1	134968142	134969059
chr1	135055623	135056044
chr1	135075446	135075771
chr1	135289623	135290164
chr1	135294501	135294829
chr1	135330842	135331791
chr1	135751650	135752077
chr1	135956752	135961199
chr1	135964102	135964296
chr1	135968150	135968344
chr1	135989174	135990474
chr1	135992229	135993919
chr1	135994730	135996647
chr1	136000253	136000886
chr1	136064286	136064893
chr1	136106842	136107437
chr1	136140738	136142184
chr1	136162607	136163199
chr1	136412803	136413401
chr1	136548089	136548880
chr1	137022814	137023802
chr1	137050754	137051988
chr1	137053009	137053541
chr1	137054180	137056744
chr1	137057471	137057910
chr1	137059159	137059731
chr1	137068806	137068982
chr1	137083160	137083411
chr1	137092419	137092880
chr1	137244156	137244900
chr1	137265035	137265721
chr1	137307989	137308944
chr1	137409110	137410792
chr1	137411687	137412610
chr1	137445416	137446145
chr1	137460070	137462755
chr1	137477501	137477644
chr1	137555438	137556903
chr1	137566148	137567105
chr1	137630658	137631398
chr1	137666954	137668024
chr1	137748625	137749081
chr1	137952615	137952990
chr1	138015873	138016063
chr1	138033212	138033668
chr1	138034454	138035139
chr1	138036630	138037340
chr1	138037943	138040587
chr1	138222387	138222992
chr1	138228208	138228728
chr1	138229568	138229883
chr1	138259255	138259421
chr1	138277544	138278295
chr1	138352249	138353604
chr1	138359089	138359422
chr1	138665610	138665951
chr1	138678106	138678594
chr1	139553124	139554456
chr1	139794700	139800571
chr1	139823800	139825476
chr1	139826169	139826561
chr1	140045689	140046189
chr1	140491633	140494764
chr1	141077671	141078155
chr1	141233689	141234493
chr1	141242554	141243972
chr1	144976309	144977756
chr1	145865543	145865695
chr1	148432186	148432378
chr1	148690333	148692073
chr1	152383059	152383618
chr1	152606135	152606688
chr1	152789305	152790070
chr1	153083509	153083832
chr1	153533009	153533148
chr1	153567147	153567489
chr1	153725429	153726278
chr1	153772712	153773286
chr1	153791579	153792350
chr1	153792904	153793081
chr1	153830969	153831288
chr1	153855996	153856178
chr1	154011426	154013560
chr1	154015009	154015694
chr1	154049954	154050648
chr1	154261594	154261794
chr1	154301767	154303508
chr1	154308092	154309894
chr1	154313335	154313551
chr1	154315134	154315779
chr1	154403032	154404179
chr1	154407767	154408197
chr1	154420101	154420797
chr1	154446252	154446663
chr1	154459595	154460275
chr1	154639818	154640850
chr1	154664208	154665526
chr1	154861409	154862327
chr1	154885096	154885583
chr1	154907447	154907643
chr1	154931572	154931794
chr1	154981393	154981784
chr1	155038581	155038953
chr1	155154630	155156732
chr1	155379479	155379668
chr1	155488979	155489381
chr1	155549931	155551483
chr1	155949662	155950918
chr1	155997387	155997732
chr1	156003743	156004638
chr1	156508703	156508963
chr1	156829977	156830797
chr1	156902931	156904200
chr1	156938821	156939750
chr1	156969647	156969783
chr1	157056832	157058503
chr1	157059315	157060850
chr1	157076608	157077346
chr1	157083834	157084906
chr1	157086557	157087481
chr1	157376742	157376899
chr1	157545449	157546203
chr1	157547961	157548135
chr1	158113517	158113665
chr1	158350779	158351308
chr1	158544248	158544628
chr1	158545379	158546267
chr1	158685146	158685427
chr1	158861375	158861687
chr1	158927195	158928493
chr1	158968496	158970565
chr1	159109272	159109412
chr1	159174217	159174784
chr1	159347852	159348405
chr1	159356150	159356547
chr1	159370165	159370565
chr1	159448829	159449538
chr1	160091500	160092000
chr1	160156683	160158349
chr1	160196529	160197494
chr1	160240671	160240900
chr1	160316093	160317637
chr1	160419580	160420736
chr1	160484365	160484657
chr1	161302367	161302508
chr1	161343274	161344404
chr1	161591163	161591831
chr1	161600568	161601749
chr1	161670963	161672277
chr1	161691400	161691542
chr1	161703877	161704115
chr1	162079493	162080111
chr1	162300628	162300882
chr1	162786247	162786642
chr1	163537423	163537623
chr1	163642812	163643411
chr1	163752804	163753012
chr1	163929319	163930953
chr1	164126825	164126958
chr1	164139216	164140129
chr1	164243790	164244340
chr1	164574190	164574422
chr1	164761884	164762286
chr1	165183019	165183178
chr1	165210923	165211143
chr1	165212356	165212773
chr1	165269243	165269672
chr1	166829100	166829486
chr1	167121339	167122143
chr1	167211498	167212706
chr1	167518985	167520078
chr1	167540635	167541433
chr1	167710589	167711043
chr1	167973505	167973914
chr1	168112839	168113329
chr1	168114684	168115278
chr1	168212663	168213283
chr1	168328665	168329575
chr1	168332010	168332256
chr1	168830519	168831076
chr1	169169728	169170800
chr1	169295158	169295291
chr1	170146087	170146876
chr1	170217318	170218700
chr1	170220876	170221926
chr1	170287258	170288977
chr1	170480100	170480716
chr1	170981926	170982200
chr1	171389285	171389870
chr1	171392117	171393463
chr1	171397189	171398941
chr1	171414151	171415958
chr1	171863919	171864249
chr1	172389947	172390510
chr1	172585795	172585928
chr1	172651094	172652516
chr1	173032272	173033599
chr1	173040824	173042265
chr1	173119235	173120128
chr1	173123180	173123703
chr1	173192149	173194047
chr1	173370281	173370769
chr1	173978401	173978534
chr1	174130754	174131522
chr1	174132150	174134098
chr1	174147127	174147337
chr1	174239980	174240391
chr1	174263973	174264221
chr1	174278768	174281782
chr1	176452113	176453543
chr1	176467044	176467237
chr1	176969775	176969980
chr1	177057965	177060312
chr1	177340553	177340816
chr1	178730647	178732092
chr1	178780608	178781020
chr1	178916947	178918096
chr1	178923418	178925491
chr1	178928017	178928471
chr1	178943579	178945764
chr1	179237036	179238432
chr1	179268813	179269490
chr1	179342014	179342401
chr1	179485638	179486399
chr1	179553504	179553654
chr1	179570225	179570948
chr1	179632807	179633026
chr1	180287847	180288895
chr1	180298768	180300092
chr1	180972147	180972424
chr1	181091926	181092423
chr1	181639371	181640085
chr1	182242310	182243218
chr1	182288387	182289541
chr1	182294945	182295872
chr1	182307082	182307515
chr1	182316815	182317960
chr1	182320399	182321857
chr1	182322963	182324451
chr1	182337511	182338395
chr1	182350491	182351436
chr1	182707477	182708715
chr1	182939534	182940990
chr1	183459449	183459672
chr1	183567974	183568393
chr1	183724314	183724658
chr1	183811587	183812421
chr1	184016610	184017126
chr1	184019059	184020999
chr1	184033478	184033763
chr1	184391259	184392164
chr1	184405005	184405716
chr1	184469272	184469522
chr1	184504249	184504398
chr1	184811594	184812475
chr1	184838458	184838973
chr1	184848541	184849948
chr1	184913327	184913543
chr1	185397527	185398969
chr1	185607403	185607541
chr1	185615756	185616827
chr1	185771025	185771223
chr1	185865721	185865916
chr1	185875932	185876116
chr1	185889240	185891178
chr1	186264881	186265501
chr1	186277120	186277822
chr1	187017442	187017598
chr1	187023176	187025819
chr1	187396747	187397621
chr1	187565657	187565821
chr1	188433521	188434396
chr1	188451426	188452475
chr1	188478377	188479589
chr1	190772284	190772421
chr1	191052313	191052771
chr1	191468403	191469229
chr1	191555361	191556180
chr1	191904132	191904659
chr1	191984749	191986031
chr1	192479746	192480167
chr1	192505949	192507236
chr1	192551413	192552064
chr1	192685821	192686144
chr1	193116168	193117117
chr1	193120304	193120701
chr1	193318969	193319217
chr1	193804881	193806356
chr1	193816001	193816540
chr1	193885889	193886092
chr1	193893954	193894576
chr1	194660779	194661266
chr1	194915619	194916507
chr1	195015231	195016288
chr1	195064484	195064790
chr1	195082444	195083103
chr1	195104683	195105107
chr1	195142335	195142771
chr1	195143312	195144074
chr1	195156695	195157114
chr1	195161185	195161702
chr1	195164168	195165702
chr1	195172888	195173313
chr1	195577927	195579101
chr1	196439316	196440429
chr1	196485134	196485400
chr1	196566154	196566287
chr1	196568691	196569758
chr1	196572313	196573449
chr1	196705286	196706335
chr1	196711698	196712175
chr10	3187024	3188086
chr10	3227562	3228712
chr10	4335225	4335365
chr10	5035277	5036872
chr10	6238004	6240335
chr10	6265977	6267303
chr10	6366529	6367996
chr10	6648865	6650894
chr10	6835993	6837078
chr10	6951152	6952428
chr10	7302263	7302844
chr10	7559419	7559876
chr10	7895979	7896530
chr10	8059709	8060248
chr10	8472207	8472452
chr10	8480460	8480889
chr10	8481620	8482456
chr10	8520540	8523055
chr10	8523800	8525000
chr10	8527442	8527816
chr10	8601172	8601407
chr10	10192085	10192414
chr10	11025803	11026022
chr10	12266305	12268895
chr10	14202279	14203301
chr10	16161257	16161390
chr10	17790088	17790928
chr10	18049475	18049842
chr10	18109008	18109328
chr10	18149756	18151770
chr10	18202109	18202840
chr10	18225437	18225795
chr10	18226502	18226890
chr10	18245724	18246317
chr10	18905643	18905779
chr10	19824194	19824327
chr10	20574682	20575195
chr10	21398667	21399282
chr10	22466097	22466784
chr10	22735881	22736083
chr10	23955446	23955699
chr10	24036949	24037510
chr10	24205476	24205670
chr10	24402372	24402615
chr10	24681156	24681380
chr10	24736074	24736242
chr10	24742340	24745104
chr10	25031507	25031805
chr10	25169157	25169774
chr10	25510096	25510332
chr10	25754870	25755064
chr10	26284258	26284438
chr10	26519538	26519803
chr10	28937608	28938213
chr10	30892936	30893504
chr10	31312759	31313183
chr10	32589162	32589972
chr10	32915910	32916251
chr10	33753718	33753882
chr10	34036637	34036770
chr10	36797610	36798146
chr10	36969546	36971658
chr10	37034667	37034986
chr10	37098053	37098931
chr10	37403127	37404546
chr10	37411332	37412677
chr10	37531859	37532039
chr10	37532784	37533208
chr10	38028170	38029535
chr10	38101859	38102181
chr10	38273420	38273869
chr10	38275141	38275274
chr10	38574810	38575316
chr10	38628208	38628389
chr10	38891132	38891572
chr10	38892936	38893308
chr10	38905241	38905812
chr10	38928671	38929786
chr10	38947578	38947778
chr10	38985750	38986981
chr10	39009728	39010335
chr10	39011083	39012536
chr10	39099265	39099413
chr10	39170405	39171724
chr10	39178961	39180135
chr10	39181905	39182593
chr10	39191056	39192241
chr10	39204834	39204967
chr10	39221310	39222858
chr10	39225010	39225495
chr10	39253510	39255565
chr10	39257099	39257592
chr10	39259707	39263574
chr10	39271614	39273577
chr10	39306455	39307105
chr10	39307666	39308368
chr10	39315456	39315830
chr10	39360524	39361657
chr10	39365892	39367865
chr10	39378741	39380704
chr10	39390735	39395550
chr10	40091214	40093009
chr10	40167057	40167298
chr10	40219073	40220849
chr10	40235136	40237382
chr10	40238866	40239723
chr10	40243303	40243436
chr10	41220350	41221297
chr10	41272864	41273031
chr10	41654302	41656107
chr10	41809654	41809790
chr10	42065290	42067548
chr10	42130701	42131118
chr10	42762421	42763636
chr10	42793168	42793341
chr10	42874921	42875438
chr10	42972104	42972352
chr10	43247147	43247810
chr10	43838218	43838870
chr10	44716918	44718400
chr10	44719940	44720305
chr10	44848097	44849156
chr10	46822696	46823199
chr10	52424022	52424800
chr10	53256977	53258016
chr10	57463929	57464489
chr10	57495667	57496050
chr10	57496667	57497212
chr10	57542413	57542870
chr10	57548287	57549481
chr10	57798487	57798884
chr10	57800598	57802386
chr10	57803703	57805217
chr10	57845544	57846793
chr10	58062972	58065867
chr10	58067351	58067884
chr10	58081414	58082179
chr10	58101933	58102112
chr10	58552674	58552984
chr10	58612887	58613106
chr10	58798263	58798473
chr10	59001657	59001790
chr10	59002372	59003123
chr10	59236409	59236710
chr10	59352673	59353667
chr10	59370020	59372632
chr10	59379020	59379400
chr10	59406239	59406651
chr10	59420294	59420676
chr10	59421307	59421902
chr10	59441077	59442274
chr10	59654659	59654830
chr10	59656407	59656994
chr10	59665177	59666675
chr10	59671377	59673597
chr10	59675552	59675738
chr10	59724563	59726531
chr10	59814078	59815207
chr10	60279383	60279929
chr10	60748001	60748392
chr10	60837164	60838069
chr10	60839311	60839444
chr10	60851791	60852809
chr10	60998910	60999375
chr10	61033097	61033230
chr10	61038725	61039243
chr10	61053856	61054793
chr10	61655192	61656192
chr10	61656819	61658286
chr10	61782993	61783946
chr10	61818792	61819747
chr10	62202611	62203380
chr10	62591084	62591585
chr10	63417089	63417397
chr10	63440728	63441268
chr10	66327014	66327147
chr10	66383032	66384562
chr10	66456472	66458970
chr10	66481341	66481963
chr10	66488258	66489468
chr10	66515944	66516395
chr10	66520642	66521546
chr10	66524102	66524939
chr10	66605972	66607774
chr10	66688137	66690242
chr10	66750480	66751220
chr10	67308838	67309240
chr10	67416550	67418275
chr10	67428178	67430039
chr10	67572755	67573602
chr10	67616764	67616936
chr10	67628124	67628944
chr10	67654007	67655988
chr10	67674928	67675274
chr10	68257745	68259149
chr10	68304985	68305546
chr10	68716508	68717569
chr10	69074601	69074776
chr10	69334898	69335507
chr10	69842504	69843381
chr10	69947385	69947900
chr10	69982588	69983782
chr10	70111386	70112456
chr10	70179706	70180639
chr10	70269725	70270031
chr10	70290171	70290870
chr10	70291410	70291818
chr10	70521363	70522010
chr10	73576546	73577603
chr10	74415220	74416098
chr10	74479226	74479387
chr10	74526451	74526599
chr10	74583724	74583906
chr10	74633089	74633650
chr10	74900851	74901066
chr10	74913518	74914605
chr10	75018713	75019248
chr10	75095946	75096092
chr10	75110180	75110912
chr10	75147456	75148150
chr10	75149257	75150120
chr10	75166787	75167914
chr10	75290250	75292012
chr10	75335452	75336215
chr10	75361133	75361974
chr10	75530563	75531230
chr10	75720000	75721708
chr10	76322246	76322741
chr10	76471007	76471205
chr10	76592871	76593354
chr10	76613981	76614350
chr10	76669681	76669826
chr10	76678230	76678954
chr10	76689791	76689924
chr10	76692443	76693405
chr10	76714464	76715039
chr10	76767951	76768406
chr10	77096995	77097966
chr10	77101808	77101946
chr10	77685700	77685985
chr10	77699230	77700250
chr10	77769234	77770010
chr10	77933518	77934142
chr10	78032866	78034791
chr10	78184891	78187070
chr10	78275197	78275448
chr10	79069282	79069520
chr10	79266631	79266931
chr10	79364073	79364412
chr10	79533490	79535065
chr10	79547987	79548174
chr10	79616609	79617104
chr10	79617778	79618257
chr10	79619209	79620407
chr10	79621121	79624153
chr10	79627557	79627824
chr10	79704640	79705077
chr10	79718634	79719689
chr10	79875400	79878280
chr10	79881377	79882320
chr10	80029512	80029765
chr10	80236929	80237407
chr10	80399136	80399409
chr10	80400621	80400791
chr10	80403375	80404035
chr10	80426131	80427042
chr10	80429988	80430388
chr10	80473579	80474100
chr10	80616903	80619182
chr10	80636049	80636458
chr10	80748254	80749093
chr10	80764884	80766282
chr10	80852189	80853351
chr10	80864241	80864838
chr10	80873871	80875353
chr10	80879213	80880614
chr10	81026840	81027808
chr10	81031554	81031715
chr10	81033511	81034806
chr10	81044400	81044963
chr10	82519045	82519225
chr10	82524804	82525543
chr10	82592766	82594305
chr10	82605273	82606967
chr10	82647183	82647556
chr10	82764241	82764574
chr10	83093367	83096063
chr10	83097413	83097681
chr10	83100091	83100482
chr10	83102447	83102693
chr10	83103856	83105114
chr10	83107539	83108280
chr10	83523595	83523960
chr10	84105603	84105761
chr10	84108290	84110374
chr10	84119318	84119687
chr10	84120236	84122334
chr10	84122958	84123265
chr10	84129661	84130215
chr10	84138716	84139395
chr10	84147435	84150722
chr10	84152649	84153208
chr10	84156590	84157567
chr10	84172759	84174521
chr10	84175549	84176093
chr10	84235215	84236201
chr10	84239992	84240768
chr10	84265985	84266551
chr10	84272804	84273596
chr10	84314849	84316105
chr10	84431285	84432340
chr10	84485854	84486244
chr10	85001879	85002927
chr10	85656627	85657024
chr10	85786106	85786249
chr10	85802667	85803047
chr10	85838601	85839372
chr10	85919657	85921045
chr10	85926449	85926617
chr10	86234650	86235355
chr10	86270477	86271328
chr10	86282121	86283358
chr10	86882374	86882853
chr10	86909289	86911260
chr10	86951396	86953554
chr10	88053627	88054174
chr10	89843488	89844129
chr10	89945453	89945675
chr10	89956123	89958875
chr10	90059281	90059604
chr10	90445664	90446113
chr10	90643312	90646317
chr10	90650345	90651060
chr10	91182393	91182663
chr10	92628869	92629383
chr10	92717451	92719263
chr10	92724090	92725147
chr10	92725944	92728017
chr10	92735471	92736033
chr10	92737203	92740098
chr10	92761016	92761149
chr10	92837988	92838276
chr10	92886422	92887137
chr10	92894689	92896795
chr10	93057065	93057205
chr10	93142273	93142550
chr10	93198549	93199883
chr10	93234114	93235753
chr10	93246066	93246599
chr10	93381477	93382558
chr10	93693292	93694004
chr10	93813381	93814168
chr10	93876391	93877011
chr10	93878682	93879166
chr10	93889148	93890077
chr10	93943157	93943431
chr10	93956984	93958025
chr10	93984572	93984780
chr10	93986205	93986883
chr10	93992337	93992553
chr10	93993245	93993679
chr10	94007774	94008562
chr10	94047773	94048208
chr10	94172098	94173008
chr10	94605536	94605995
chr10	95085812	95086652
chr10	95133483	95134145
chr10	95188031	95189137
chr10	95280312	95280451
chr10	95556964	95557538
chr10	95771391	95772614
chr10	95861875	95862570
chr10	96109176	96109672
chr10	96182927	96183244
chr10	96775739	96776962
chr10	97811793	97812419
chr10	98211819	98212455
chr10	98404642	98405131
chr10	98593072	98594276
chr10	98594956	98595449
chr10	98598566	98600301
chr10	98634122	98635063
chr10	98659950	98660865
chr10	98666074	98667608
chr10	98730614	98732288
chr10	98914370	98915036
chr10	99404397	99404584
chr10	99484441	99485358
chr10	99622941	99623137
chr10	100204044	100204259
chr10	105075404	105077230
chr10	105225847	105227115
chr10	105678984	105679117
chr10	107368626	107369508
chr10	107454446	107455397
chr10	107569803	107572341
chr10	107621472	107622426
chr10	108997847	108998707
chr10	109006426	109006789
chr10	109410677	109410902
chr10	109423102	109423746
chr10	109424437	109425719
chr10	109914578	109915248
chr10	110389810	110390733
chr10	110536629	110537164
chr10	110554431	110554584
chr10	110792079	110792220
chr10	110855710	110857402
chr10	110976767	110977104
chr10	111003713	111004715
chr10	111036604	111038187
chr10	111102482	111104431
chr10	111304406	111305068
chr10	111373236	111373965
chr10	111600504	111600638
chr10	114905820	114906026
chr10	115187332	115187546
chr10	115798168	115800156
chr10	115807958	115808835
chr10	116177492	116177800
chr10	116205690	116206135
chr10	116531285	116532656
chr10	117032841	117033222
chr10	117486037	117486876
chr10	118407957	118408257
chr10	118491956	118492099
chr10	118492645	118492831
chr10	118502630	118502763
chr10	118655709	118655948
chr10	118845138	118846220
chr10	119121183	119121922
chr10	119128570	119129821
chr10	119190946	119191096
chr10	119814886	119815505
chr10	119858985	119859880
chr10	119862543	119863320
chr10	119863868	119864451
chr10	120001980	120002193
chr10	120122706	120123527
chr10	120188417	120188793
chr10	120492467	120492942
chr10	120643010	120643790
chr10	120858167	120858590
chr10	120860666	120860989
chr10	120865051	120866324
chr10	120866874	120868441
chr10	120869316	120870510
chr10	120898440	120899423
chr10	120937685	120938907
chr10	120940453	120940956
chr10	120941495	120944020
chr10	121274265	121275031
chr10	122282708	122282870
chr10	122320745	122321928
chr10	122324639	122325246
chr10	122331389	122332191
chr10	122349798	122350730
chr10	122368463	122368876
chr10	122400720	122401223
chr10	122427810	122428900
chr10	123686248	123686472
chr10	125889941	125890214
chr10	126265150	126266268
chr10	126282413	126282922
chr10	126342706	126343009
chr10	126421812	126424788
chr10	126518276	126519369
chr10	126520319	126520624
chr10	126531138	126533335
chr10	126945663	126947214
chr10	126979088	126980296
chr10	127033623	127034790
chr10	127037373	127037752
chr10	127041776	127041965
chr10	127050898	127052069
chr10	127422535	127422684
chr10	127780234	127782375
chr10	128216046	128216678
chr10	128233152	128233622
chr10	128325911	128326630
chr10	128365383	128365580
chr10	128375770	128376244
chr10	129751052	129751446
chr11	3135220	3135497
chr11	3237294	3237746
chr11	3294703	3294836
chr11	3296292	3296544
chr11	3297202	3297958
chr11	3434982	3436332
chr11	3472988	3473723
chr11	3753254	3753437
chr11	3803306	3803504
chr11	4074247	4075179
chr11	4083427	4083942
chr11	4090471	4090750
chr11	4091406	4093561
chr11	4103755	4104132
chr11	4128543	4128807
chr11	4160813	4161622
chr11	4191509	4192222
chr11	4194962	4195518
chr11	4235770	4236125
chr11	4236749	4237224
chr11	4562348	4562686
chr11	4574402	4575136
chr11	4578856	4579664
chr11	5010602	5010939
chr11	5049268	5049458
chr11	5065521	5065742
chr11	5076573	5077622
chr11	5087593	5088182
chr11	5088824	5091160
chr11	5091951	5093066
chr11	5155130	5155864
chr11	5156459	5157386
chr11	5171347	5171573
chr11	5180878	5182010
chr11	5217927	5218959
chr11	5291086	5291979
chr11	5756024	5756659
chr11	5920293	5921745
chr11	5928716	5931336
chr11	5932015	5932152
chr11	5935243	5938702
chr11	5975155	5976719
chr11	6007134	6008496
chr11	6009188	6009917
chr11	6052894	6055130
chr11	6056058	6057567
chr11	6059586	6061784
chr11	6077931	6079985
chr11	6082878	6083071
chr11	6084017	6084785
chr11	6304996	6305448
chr11	6306363	6306569
chr11	6380903	6382066
chr11	6468356	6469697
chr11	6955503	6956595
chr11	7036022	7036450
chr11	7365136	7367379
chr11	8046756	8048820
chr11	8114832	8115710
chr11	8324169	8325160
chr11	8343498	8344151
chr11	8345665	8346130
chr11	8356526	8357293
chr11	8358053	8358387
chr11	8381778	8382869
chr11	8396500	8397295
chr11	8413078	8413580
chr11	8858181	8858946
chr11	14669835	14669968
chr11	16434361	16435965
chr11	16490881	16492270
chr11	16527656	16529020
chr11	16569381	16570725
chr11	16709456	16709645
chr11	16716610	16716926
chr11	16730678	16730943
chr11	16731648	16732702
chr11	16744215	16744374
chr11	16835701	16836032
chr11	16840885	16842463
chr11	17317797	17317932
chr11	17360550	17361238
chr11	17851197	17851506
chr11	18480842	18482743
chr11	18991451	18991609
chr11	19011896	19012054
chr11	19102800	19105444
chr11	19423464	19423978
chr11	19817635	19818202
chr11	20295933	20296785
chr11	20300344	20301005
chr11	20359798	20361183
chr11	20376976	20378714
chr11	20432157	20432580
chr11	20461306	20461551
chr11	20503038	20503811
chr11	20515633	20516597
chr11	20539928	20540702
chr11	20555692	20556428
chr11	20758053	20760209
chr11	20814249	20817136
chr11	20822511	20824025
chr11	20841277	20841933
chr11	20910475	20911116
chr11	20936586	20936779
chr11	21061573	21062226
chr11	21117701	21118058
chr11	21907073	21909025
chr11	22247172	22247305
chr11	22247958	22249519
chr11	22337298	22337438
chr11	22359025	22359743
chr11	22483880	22485128
chr11	22544366	22545006
chr11	23040203	23041894
chr11	28265312	28265897
chr11	29327604	29329301
chr11	29536754	29537152
chr11	29538452	29539396
chr11	29677636	29678195
chr11	29739404	29740605
chr11	30061084	30061655
chr11	30143338	30143491
chr11	30572314	30573127
chr11	30620408	30620906
chr11	31612175	31614436
chr11	31618756	31618966
chr11	31629953	31630143
chr11	31634016	31634803
chr11	31660320	31660677
chr11	31667755	31668854
chr11	31670447	31671508
chr11	31695912	31696672
chr11	31707450	31708621
chr11	31730055	31731269
chr11	31737902	31739721
chr11	31746406	31747736
chr11	31840998	31841882
chr11	31910338	31910693
chr11	31920016	31920957
chr11	32056640	32059410
chr11	32135749	32136919
chr11	32144409	32144882
chr11	32229869	32232420
chr11	32257500	32258105
chr11	32262928	32264696
chr11	32283467	32284459
chr11	32446455	32446732
chr11	32466994	32467369
chr11	32519264	32519609
chr11	32680534	32682343
chr11	32686143	32687024
chr11	32700912	32701690
chr11	32841455	32842167
chr11	32846250	32846670
chr11	33121798	33122488
chr11	34081842	34082146
chr11	35670088	35670584
chr11	35702646	35702926
chr11	35706207	35707599
chr11	35733373	35734113
chr11	35740040	35741448
chr11	35744502	35744635
chr11	35745592	35748362
chr11	35789914	35790207
chr11	35790886	35791019
chr11	43198454	43199737
chr11	43363078	43363631
chr11	43382481	43383934
chr11	43426390	43426670
chr11	44309496	44309903
chr11	44514958	44515231
chr11	44553825	44554040
chr11	44554603	44555028
chr11	44627107	44627241
chr11	45876641	45877348
chr11	45878123	45880534
chr11	45882115	45882803
chr11	45897862	45899201
chr11	45905370	45905540
chr11	45924049	45924626
chr11	49539910	49540668
chr11	49551359	49551961
chr11	49577006	49579534
chr11	49744685	49744946
chr11	50066084	50067091
chr11	50305936	50306204
chr11	51458735	51459270
chr11	51636683	51637744
chr11	51893871	51894006
chr11	51899098	51900972
chr11	52099816	52100193
chr11	52146529	52147497
chr11	53283055	53284252
chr11	53305350	53305967
chr11	53308698	53310090
chr11	53310656	53310965
chr11	53320940	53322459
chr11	53342465	53344350
chr11	53575424	53575586
chr11	53875117	53876388
chr11	53969184	53970127
chr11	54125555	54125763
chr11	54538110	54538517
chr11	54565086	54565652
chr11	54566823	54569732
chr11	54625918	54627044
chr11	54685332	54686426
chr11	54828984	54829716
chr11	54836291	54837412
chr11	54917174	54917307
chr11	55191856	55192375
chr11	55237315	55237685
chr11	55241644	55242052
chr11	56739073	56739324
chr11	57344726	57344904
chr11	57366448	57367084
chr11	57411442	57411885
chr11	57469784	57471072
chr11	57509601	57510475
chr11	57514789	57515790
chr11	57587018	57587439
chr11	57775669	57776531
chr11	59521403	59522547
chr11	59545077	59547028
chr11	59713249	59714115
chr11	59887219	59887566
chr11	59927788	59929440
chr11	59988999	59990298
chr11	60022468	60024469
chr11	60061701	60062607
chr11	60087212	60087426
chr11	60108235	60108493
chr11	60124364	60126304
chr11	60159900	60161060
chr11	60516355	60518372
chr11	60817590	60818119
chr11	60818882	60819266
chr11	60838406	60839339
chr11	60873141	60874516
chr11	60970861	60971762
chr11	61279273	61280207
chr11	61332885	61334127
chr11	61342100	61344530
chr11	61345997	61346987
chr11	61347937	61348925
chr11	61350297	61351786
chr11	61377953	61379201
chr11	61433149	61433970
chr11	61837510	61838185
chr11	61871220	61871936
chr11	61882802	61883993
chr11	61908720	61908868
chr11	61919066	61920808
chr11	62005801	62006019
chr11	62077363	62077787
chr11	62427587	62427776
chr11	62779639	62781698
chr11	62811127	62811675
chr11	62939424	62939721
chr11	62949666	62949847
chr11	63225865	63226017
chr11	63268515	63268710
chr11	63779393	63779581
chr11	66695569	66696182
chr11	66798175	66799079
chr11	66814476	66814665
chr11	67295872	67296065
chr11	67409707	67410485
chr11	67843432	67845014
chr11	67862677	67863314
chr11	67863918	67864494
chr11	67958017	67960600
chr11	68001892	68002738
chr11	68012321	68014199
chr11	68018698	68019883
chr11	68021330	68022651
chr11	68027576	68030087
chr11	68057332	68058715
chr11	68154621	68155753
chr11	68170414	68170605
chr11	68213056	68213827
chr11	68532492	68532973
chr11	68639215	68639436
chr11	68724732	68725411
chr11	68801340	68802101
chr11	68825523	68825995
chr11	68853204	68854219
chr11	68876807	68877720
chr11	69179549	69180034
chr11	69230668	69233268
chr11	69270783	69270927
chr11	69404953	69406250
chr11	69413380	69414592
chr11	69520328	69520593
chr11	69840289	69843759
chr11	70398774	70399226
chr11	70544179	70544930
chr11	70645212	70645358
chr11	71253378	71253909
chr11	71485845	71486377
chr11	71568489	71570386
chr11	71570937	71573673
chr11	71574600	71574832
chr11	71576016	71577451
chr11	71582725	71584064
chr11	71798538	71799730
chr11	71809149	71810447
chr11	71824287	71826087
chr11	71862476	71863057
chr11	71864039	71864536
chr11	71900106	71900764
chr11	71968253	71969274
chr11	71970005	71970151
chr11	72039667	72040679
chr11	72047364	72048250
chr11	72181596	72181872
chr11	72766165	72766723
chr11	72828288	72829707
chr11	72897991	72899150
chr11	73146617	73147781
chr11	74451450	74452605
chr11	74466147	74467338
chr11	74565129	74565344
chr11	74649814	74652436
chr11	74655705	74657270
chr11	74680352	74680485
chr11	74684664	74684906
chr11	74690294	74690913
chr11	74952943	74953269
chr11	75015298	75015509
chr11	75022980	75023128
chr11	75025144	75027896
chr11	75073000	75074602
chr11	75081018	75082229
chr11	75084794	75085132
chr11	75105146	75105320
chr11	75228322	75229769
chr11	75351254	75352259
chr11	75434139	75434646
chr11	75461195	75462095
chr11	75625614	75625843
chr11	75961418	75962708
chr11	76232046	76232717
chr11	76259196	76259711
chr11	76262769	76263961
chr11	76277072	76278215
chr11	76304269	76304402
chr11	76317506	76318145
chr11	76342955	76343915
chr11	76345027	76345790
chr11	76460254	76461520
chr11	76548673	76549264
chr11	76649479	76649615
chr11	76662613	76664102
chr11	76667990	76668981
chr11	76670317	76671235
chr11	76713216	76713349
chr11	77199646	77199852
chr11	77300251	77300914
chr11	77311840	77312657
chr11	77437232	77439447
chr11	77443871	77444018
chr11	77579885	77580379
chr11	77599056	77600439
chr11	77604138	77605799
chr11	77606351	77607305
chr11	77627088	77627364
chr11	77642699	77643407
chr11	77662685	77662896
chr11	77689592	77690681
chr11	77709807	77711227
chr11	77714601	77715925
chr11	77716555	77717826
chr11	77747637	77748318
chr11	77750302	77750626
chr11	77778616	77779385
chr11	77857912	77859125
chr11	77934348	77935314
chr11	78028844	78030287
chr11	78092804	78093389
chr11	78225541	78225899
chr11	78559048	78559743
chr11	78700200	78700373
chr11	78907953	78909948
chr11	78949081	78949752
chr11	79001939	79002517
chr11	79027739	79028006
chr11	79043039	79043791
chr11	79080505	79081337
chr11	79120236	79120802
chr11	79266134	79266508
chr11	79274338	79274554
chr11	79458285	79458455
chr11	79459740	79460997
chr11	79517187	79518564
chr11	79542984	79544187
chr11	79552193	79553064
chr11	79605751	79606617
chr11	79645293	79645755
chr11	80149141	80149310
chr11	80149853	80149986
chr11	80317169	80318587
chr11	83856510	83856643
chr11	83887084	83887337
chr11	83992547	83994496
chr11	84137495	84138566
chr11	85527489	85528053
chr11	85574338	85574540
chr11	85655304	85655624
chr11	85671226	85671991
chr11	85730714	85730878
chr11	86286105	86286757
chr11	86390976	86391282
chr11	86392858	86393133
chr11	86405528	86407961
chr11	87089337	87089603
chr11	87090136	87090616
chr11	87235406	87236318
chr11	87256115	87256461
chr11	87261480	87261782
chr11	87355954	87356704
chr11	87408855	87409515
chr11	87900366	87901257
chr11	87927117	87927289
chr11	87931663	87933713
chr11	87939753	87940378
chr11	87952654	87953329
chr11	87955511	87956230
chr11	87960014	87960929
chr11	87962257	87962868
chr11	87964518	87965431
chr11	87969145	87969278
chr11	87972174	87973067
chr11	87978187	87978466
chr11	87994423	87995034
chr11	88001131	88001639
chr11	88028685	88029229
chr11	88047123	88047816
chr11	88066414	88067327
chr11	88079565	88080234
chr11	88089589	88089947
chr11	88144068	88144451
chr11	88169606	88171633
chr11	88218488	88219149
chr11	88227747	88228372
chr11	88239422	88239561
chr11	88269159	88269564
chr11	88273560	88274575
chr11	88281192	88281675
chr11	88285147	88286560
chr11	88294871	88296572
chr11	88338081	88339070
chr11	88342260	88342879
chr11	88352804	88353875
chr11	88355052	88355187
chr11	88355883	88357681
chr11	88363019	88363337
chr11	88364074	88365103
chr11	88366439	88367041
chr11	88388165	88388363
chr11	88395395	88399633
chr11	88402523	88403582
chr11	88465691	88465824
chr11	88466610	88467357
chr11	88468795	88470685
chr11	89243245	89243741
chr11	90230451	90231354
chr11	90243446	90243905
chr11	90279101	90279807
chr11	90527679	90527906
chr11	93689809	93691605
chr11	93908808	93909365
chr11	93914423	93917080
chr11	93994755	93999572
chr11	94005915	94007509
chr11	94019876	94022914
chr11	94036738	94037224
chr11	94094289	94095565
chr11	94143731	94143864
chr11	94205132	94205489
chr11	94819004	94819946
chr11	94848426	94849315
chr11	94861604	94862280
chr11	95226683	95227508
chr11	95231265	95231893
chr11	95253063	95254828
chr11	95537076	95537819
chr11	95929444	95930005
chr11	96624492	96624782
chr11	96722962	96723337
chr11	96724000	96724880
chr11	96764624	96765022
chr11	96829732	96831764
chr11	97150856	97151722
chr11	97163490	97164749
chr11	97199800	97200349
chr11	97404626	97404912
chr11	97530370	97531890
chr11	97666248	97666481
chr11	97667214	97667851
chr11	97670378	97670527
chr11	97672540	97672944
chr11	97673705	97675715
chr11	97676835	97677119
chr11	97679432	97680627
chr11	97682294	97682485
chr11	97686242	97687012
chr11	98214859	98215921
chr11	98221944	98223379
chr11	98232447	98233624
chr11	98240880	98241307
chr11	98568501	98569957
chr11	98570536	98571058
chr11	98626826	98627145
chr11	98643169	98645310
chr11	98646175	98648325
chr11	98649893	98650874
chr11	98728405	98729476
chr11	98791011	98791219
chr11	98791789	98793011
chr11	98811291	98813313
chr11	98832889	98833231
chr11	98974133	98974516
chr11	98981309	98982940
chr11	100176956	100178063
chr11	100251154	100252966
chr11	100395195	100395467
chr11	100442379	100443627
chr11	100451034	100451276
chr11	100453580	100454094
chr11	100470850	100471876
chr11	100489898	100490789
chr11	100581354	100582636
chr11	100583174	100583723
chr11	100651946	100653448
chr11	100755067	100756638
chr11	100758946	100760613
chr11	100807888	100808861
chr11	100813150	100813439
chr11	100841020	100841735
chr11	100921230	100922178
chr11	100923771	100925528
chr11	101001584	101001741
chr11	101010523	101011099
chr11	101050508	101052061
chr11	101091174	101091311
chr11	101092343	101092552
chr11	101294613	101295476
chr11	101315842	101315975
chr11	101338719	101339505
chr11	101340382	101341025
chr11	101502358	101502932
chr11	101518963	101519540
chr11	101548092	101549731
chr11	101617614	101620368
chr11	101651634	101653042
chr11	101731332	101731947
chr11	101782745	101783308
chr11	101824958	101825631
chr11	102069016	102071704
chr11	102077668	102078128
chr11	102078827	102081728
chr11	102086121	102086671
chr11	102105996	102107182
chr11	102196010	102197534
chr11	102200256	102200793
chr11	102600843	102601132
chr11	103001906	103004479
chr11	103005960	103006778
chr11	103019754	103020918
chr11	103096798	103097934
chr11	103107463	103108993
chr11	103154327	103154542
chr11	103233138	103234161
chr11	103243664	103243866
chr11	103701949	103703324
chr11	104098495	104098698
chr11	104133185	104134551
chr11	104150333	104151155
chr11	104460518	104460740
chr11	104640264	104640667
chr11	105200220	105200380
chr11	105214480	105215483
chr11	105820660	105820793
chr11	105875261	105875394
chr11	105996263	105996552
chr11	106415998	106416332
chr11	106518885	106520057
chr11	106521397	106522021
chr11	106535362	106537110
chr11	106539567	106539719
chr11	106863596	106863747
chr11	106873154	106874066
chr11	106886964	106887459
chr11	106985725	106986025
chr11	107109987	107110499
chr11	107187307	107187620
chr11	107188937	107189423
chr11	107202675	107203364
chr11	107217231	107218078
chr11	107219886	107220572
chr11	107273631	107276955
chr11	107277629	107279210
chr11	107283241	107284742
chr11	107374297	107374507
chr11	107589516	107590904
chr11	107592349	107593174
chr11	107595239	107596193
chr11	107604432	107604869
chr11	107728630	107729280
chr11	107736442	107739100
chr11	107765344	107765845
chr11	107816822	107817062
chr11	107827029	107827404
chr11	108011445	108012730
chr11	108042304	108042452
chr11	108076955	108077203
chr11	108119785	108121152
chr11	108786474	108786991
chr11	108794941	108795581
chr11	108819800	108820784
chr11	108834579	108835694
chr11	108893255	108895610
chr11	109181390	109182193
chr11	109205212	109205793
chr11	109211046	109211226
chr11	109615032	109616511
chr11	110405552	110405971
chr11	110643305	110643480
chr11	111519779	111520049
chr11	111628173	111628321
chr11	111679305	111679811
chr11	111755117	111755401
chr11	111905263	111905809
chr11	112059424	112059559
chr11	112518645	112518778
chr11	112672006	112673798
chr11	112679486	112679845
chr11	112701363	112702097
chr11	112705390	112706530
chr11	112731356	112731950
chr11	112788444	112788584
chr11	112907317	112908179
chr11	112917336	112918485
chr11	113005034	113006045
chr11	113045139	113045485
chr11	113472952	113473870
chr11	113646770	113647342
chr11	113843223	113843524
chr11	113901522	113902044
chr11	114329156	114329932
chr11	114458802	114458937
chr11	114563519	114563710
chr11	114564402	114566340
chr11	114668998	114669131
chr11	114932744	114933649
chr11	115033693	115034104
chr11	115087328	115089749
chr11	115147601	115147734
chr11	115220080	115221796
chr11	115234958	115236622
chr11	115273702	115275091
chr11	115531885	115532834
chr11	115637229	115637504
chr11	115640196	115642039
chr11	115815816	115817096
chr11	115817798	115818348
chr11	115963093	115963918
chr11	115965056	115965935
chr11	116046732	116046972
chr11	116047629	116048128
chr11	116172555	116172760
chr11	116180521	116180902
chr11	116203672	116204436
chr11	116307016	116307401
chr11	116336962	116338645
chr11	116355107	116356557
chr11	116384404	116385937
chr11	116522446	116523685
chr11	116674112	116674330
chr11	116675072	116676552
chr11	116889870	116890657
chr11	116996485	116996980
chr11	117110358	117111137
chr11	117115957	117116137
chr11	117117617	117117967
chr11	117136561	117138442
chr11	117145043	117146972
chr11	117155871	117158847
chr11	117170656	117175298
chr11	117176224	117179671
chr11	117181323	117182031
chr11	117187053	117188786
chr11	117199168	117200113
chr11	117201162	117203877
chr11	117205534	117207564
chr11	117209003	117209274
chr11	117209833	117209966
chr11	117210530	117211941
chr11	117268867	117269393
chr11	117271555	117271789
chr11	117340115	117341408
chr11	117343854	117344323
chr11	117377171	117377704
chr11	117384087	117385245
chr11	117396515	117396703
chr11	117488240	117488600
chr11	117489232	117490391
chr11	117621632	117622178
chr11	117684023	117684159
chr11	117690301	117690802
chr11	117784512	117785246
chr11	117796534	117796667
chr11	117801400	117801746
chr11	117824577	117825247
chr11	117836879	117837973
chr11	117994797	117995350
chr11	118055126	118055369
chr11	118059008	118059948
chr11	118071526	118071796
chr11	118114949	118116262
chr11	118187832	118190175
chr11	118207217	118207467
chr11	118284894	118285163
chr11	118531096	118531585
chr11	118818240	118819077
chr11	118887772	118888019
chr11	118895412	118895920
chr11	118913767	118915790
chr11	118939405	118941288
chr11	118995307	118996530
chr11	119059584	119060298
chr11	119070483	119070677
chr11	119071301	119071453
chr11	119076916	119077049
chr11	119084785	119084923
chr11	119377302	119378474
chr11	119382985	119385923
chr11	119403922	119405067
chr11	119434261	119434564
chr11	119454505	119454653
chr11	119503486	119503723
chr11	119537627	119538057
chr11	119541401	119542337
chr11	119546063	119547379
chr11	119569401	119573304
chr11	119594449	119595168
chr11	119600327	119601448
chr11	119619392	119619525
chr11	119627545	119627684
chr11	119638064	119638676
chr11	119645948	119646319
chr11	119647340	119647535
chr11	119648215	119648521
chr11	119663776	119665235
chr11	119678813	119679346
chr11	119680001	119680156
chr11	119717350	119718370
chr11	119806816	119807109
chr11	119813353	119813486
chr11	119814051	119814492
chr11	119830982	119831805
chr11	119849942	119851139
chr11	119852586	119852777
chr11	119912488	119913166
chr11	119962607	119962813
chr11	119981454	119981605
chr11	120002845	120005001
chr11	120081372	120082453
chr11	120084673	120087356
chr11	120114029	120114913
chr11	120115755	120119236
chr11	120120780	120124128
chr11	120124979	120125946
chr11	120157842	120158952
chr11	120166225	120167055
chr11	120171952	120172849
chr11	120176511	120178221
chr11	120212846	120215198
chr11	120218937	120219931
chr11	120399997	120400393
chr11	120472060	120472481
chr11	120661525	120662046
chr11	120694837	120695649
chr11	120826171	120826304
chr11	121103373	121103732
chr11	121208569	121208828
chr11	121413438	121413628
chr11	121544611	121545022
chr12	3370564	3373324
chr12	3375120	3375253
chr12	3385283	3386411
chr12	3537770	3538021
chr12	3780478	3781322
chr12	3823117	3824134
chr12	3833771	3835172
chr12	3855669	3856668
chr12	3887567	3888118
chr12	3947466	3947794
chr12	4375197	4375378
chr12	4513996	4514901
chr12	4529430	4531108
chr12	4671634	4672720
[truncated: 7,863 more rows]
