# Supplementary material for: YY1 and CTCF orchestrate a 3D chromatin looping switch during early neural lineage commitment
Source: HighWire-hosted journal article supplement (doi:10.1101/gr.215160.116), 2017-05-23
Supplement: Supplemental_Table_S16.xlsx [file Supplemental_Table_S16.xlsx]

## Sheet: ES_Genes_1_8foldUpwAC_JB_2_9_17
Beagan et al. 2017
Table S16, ES Gene Annotations
#chr	start_pos	end_pos	gene_ID	gene_name	ES_Serum_Rep1	ES_Serum_Rep2	pNPC_Rep1	pNPC_Rep2
chr9	78214860	78218006	uc009qug.2	Dppa5a	13.7004	13.4841	2.07708	0.480432
chr1	120522521	120581745	uc007cil.1	Tcfcp2l1	12.7038	12.5627	2.07708	0.480432
chr14	64111183	64129929	uc007uhs.1	Tdh	12.5983	12.6217	2.07708	0.480432
chr4	133559244	133576731	uc008vdw.1	Lin28a	12.5384	12.4565	2.07708	0.480432
chr17	35640983	35647722	uc008chu.1	Pou5f1	12.4518	12.3878	2.07708	0.480432
chr8	109125267	109194146	uc009ngi.1	Cdh1	12.0321	12.1163	2.07708	0.480432
chr7	152045290	152051148	uc009kqq.1	Fgf4	11.8876	11.7981	2.07708	0.480432
chr9	114420390	114475487	uc009rxp.1	Trim71	11.734	11.9449	2.07708	4.06539
chr7	3216784	3221016	uc012ewd.1	LOC100303645	11.6783	11.6174	2.07708	0.480432
chr11	95818477	95869258	uc007lay.2	Igf2bp1	12.7868	12.8075	4.07708	2.80236
chr7	111365308	111383666	uc009ivq.1	Trim6	10.6704	10.5485	2.07708	0.480432
chr1	88197795	88203880	uc007bvk.2	B3gnt7	10.6361	10.7608	2.07708	0.480432
chr6	92192055	92196642	uc009cyw.1	Trh	10.5348	10.6243	2.07708	0.480432
chrX	83435113	83441283	uc009tsd.1	Nr0b1	10.4397	10.7268	2.07708	0.480432
chr13	98202924	98266963	uc011zdj.1	BC065997	10.4064	10.3741	2.07708	0.480432
chr4	133156470	133160083	uc008vdc.1	Sfn	10.2218	10.6404	2.07708	1.48043
chr16	48308386	48319626	uc007zjn.1	Dppa2	10.0158	9.90075	2.07708	0.480432
chr6	122555420	122562089	uc009dpm.1	Gdf3	10.9145	10.7513	3.07708	0.480432
chr15	101827141	101836773	uc007xui.1	Krt8	9.85489	10.0696	2.07708	0.480432
chr1	182821249	182829233	uc007dwu.1	Lefty2	9.82242	9.83843	2.07708	0.480432
chr19	9061773	9093685	uc008goj.1	Ahnak	9.81896	9.69195	2.07708	1.48043
chr17	88033318	88050467	uc008duy.1	Epcam	10.8085	10.6941	3.07708	1.48043
chr7	114350958	114354430	uc009jay.1	Rbmxl2	9.80721	10.2864	2.07708	0.480432
chr10	60878719	60888085	uc007ffy.2	Nodal	9.80547	10.0301	2.07708	0.480432
chr7	147127754	147131011	uc009kgf.1	Utf1	9.7781	10.4187	2.07708	0.480432
chr5	135420992	135424804	uc008zxd.2	Cldn4	9.40608	9.6358	2.07708	0.480432
chr9	78224709	78228395	uc009quh.2	Ooep	9.38985	9.23444	2.07708	0.480432
chr4	98391444	98405177	uc008tuj.1	L1td1	9.37578	9.19458	2.07708	0.480432
chr7	150687452	150690429	uc009kpj.1	Phlda2	9.36574	9.51402	2.07708	0.480432
chr7	3154659	3171204	uc009euk.1	AU018091	9.33396	9.38372	2.07708	0.480432
chr11	4838758	4850067	uc007hvm.1	Nefh	9.16502	9.07469	2.07708	2.06539
chr15	101856646	101862457	uc007xuj.2	Krt18	9.13054	9.14395	2.07708	0.480432
chr1	182863169	182868532	uc007dww.1	Lefty1	9.1144	9.08814	2.07708	0.480432
chr7	134353121	134357801	uc009jup.1	Mylpf	11.0325	10.9903	4.07708	1.48043
chr4	129984021	129992707	uc008uzd.1	Fabp3	10.5962	10.795	3.66204	2.48043
chr1	75211548	75217828	uc007bok.1	Tuba4a	11.5924	11.8214	4.66204	4.18087
chr3	8507526	8561604	uc008ooo.1	Stmn2	9.00062	8.92531	2.07708	1.48043
chr2	152932203	152977177	uc008nhc.2	Hck	8.95799	8.99837	2.07708	0.480432
chr8	120020190	120159042	uc009npc.1	Plcg2	9.84599	9.92344	3.07708	5.28779
chr1	168058590	168096641	uc007dkj.1	Gpa33	8.83146	8.99123	2.07708	0.480432
chr7	20160635	20166005	uc009fmj.2	Zfp296	8.80721	9.21004	2.07708	2.48043
chr15	76442812	76449282	uc007wlb.1	Slc39a4	8.79052	9.07131	2.07708	0.480432
chr4	41039756	41047216	uc008sih.1	Aqp3	8.77543	8.97322	2.07708	0.480432
chr15	76498736	76502303	uc007wlm.1	Foxh1	8.6718	8.97684	2.07708	1.48043
chr9	44848426	44862126	uc009pfa.2	Mpzl2	8.67085	8.68974	2.07708	0.480432
chr17	23814331	23819414	uc008asw.2	Cldn6	8.66315	8.84439	2.07708	0.480432
chr11	95960639	95975276	uc007lbh.1	Calcoco2	8.65831	8.575	2.07708	0.480432
chr7	135134886	135139381	uc009jxu.2	Pycard	8.61905	8.81233	2.07708	0.480432
chrX	135866221	135872704	uc009uke.1	Trap1a	8.56636	8.72461	2.07708	0.480432
chr17	27192248	27259168	uc008bfi.2	Itpr3	9.52289	9.93279	3.07708	3.65036
chr8	67552318	67563235	uc009lvh.1	AK014119	8.3945	8.24349	2.07708	1.48043
chr11	121005456	121009627	uc007mvi.1	Tex19.1	9.3592	9.08143	3.07708	0.480432
chr17	32081713	32173453	uc008bvs.2	Hsf2bp	9.23356	9.13101	3.07708	2.48043
chr17	57013055	57028261	uc008ddj.1	1700061G19Rik	8.22181	8.51152	2.07708	0.480432
chrX	7501401	7507733	uc009sng.1	Eras	8.2007	8.39729	2.07708	0.480432
chr4	99320989	99325362	uc008tuv.1	Foxd3	8.15064	8.5015	2.07708	0.480432
chr6	122574441	122580289	uc009dpn.1	Dppa3	8.13263	7.78781	2.07708	0.480432
chr9	78037772	78057156	uc009qty.2	Gsta4	11.6978	11.5845	5.66204	5.76583
chr7	88257684	88315302	uc009ibs.1	Slc28a1	8.08011	8.23746	2.07708	0.480432
chr15	102046425	102064366	uc012aaa.1	Itgb7	8.07867	8.34222	2.07708	0.480432
chr11	95430139	95451012	uc007lam.1	Ngfr	9.06704	9.43463	3.07708	3.80236
chr7	134357955	134363959	uc009juq.1	2017-09-01	10.6023	10.746	4.66204	4.38732
chr5	66356362	66368725	uc008xog.1	Chrna9	7.98295	7.86016	2.07708	0.480432
chr4	135801871	135830814	uc008vhv.2	Tcea3	8.97908	8.90645	3.07708	3.28779
chr3	157557211	157590027	uc008rvj.1	Cth	10.2965	10.1616	4.399	5.23532
chr2	167028695	167068037	uc008nzl.1	Ptgis	7.97364	8.0231	2.07708	0.480432
chr16	97963548	97987362	uc008adn.1	Ripk4	7.93739	7.86016	2.07708	0.480432
chr7	148019394	148023867	uc009kif.1	1190003J15Rik	7.92296	8.24349	2.07708	0.480432
chr2	164386215	164394006	uc008nve.1	Wfdc2	7.90512	7.86016	2.07708	0.480432
chr10	128006423	128028557	uc007hnm.1	Erbb3	7.90021	8.00902	2.07708	1.48043
chr7	20281592	20286515	uc009fmy.2	Apoe	10.8885	11.3728	5.07708	5.72836
chr4	127032052	127037408	uc008uuv.1	Gjb5	7.85868	7.84439	2.07708	0.480432
chr1	173365691	173394724	uc007doo.1	F11r	9.4318	9.36174	3.66204	2.48043
chr14	70772286	70830901	uc007unx.1	Piwil2	7.82974	7.58452	2.07708	0.480432
chr2	126376759	126413979	uc008mdq.1	Slc27a2	7.82112	7.76286	2.07708	0.480432
chr13	118007379	118063222	uc007rym.2	Emb	9.39159	9.21924	3.66204	3.93986
chr1	75354918	75364290	uc007box.1	Des	7.79317	8.11138	2.07708	3.28779
chr9	53617341	53665968	uc009pmn.2	Slc35f2	7.77721	7.65852	2.07708	3.65036
chr19	40296728	40348106	uc008hkk.2	Pdlim1	9.34663	9.14717	3.66204	4.28779
chr11	74431106	74455018	uc007kbz.1	E130309D14Rik	7.75927	8.05084	2.07708	3.28779
chr6	148301177	148304118	uc009etk.1	Rps4x	11.8095	12.1934	6.16454	6.67026
chr13	73482112	73486832	uc007rdj.1	AK131952	7.71899	7.31388	2.07708	0.480432
chr13	20883987	21116121	uc007ppu.1	Aoah	7.70593	7.43463	2.07708	1.48043
chr1	154969885	155035577	uc007czr.1	Lamc2	8.64957	8.61272	3.07708	2.48043
chr7	20341486	20357881	uc009fnf.1	Bcam	10.4118	10.5436	4.88443	4.06539
chr11	100117530	100124303	uc007lks.1	Krt17	7.60103	7.90645	2.07708	0.480432
chr6	122655585	122663796	uc009dpp.1	Nanogpd	7.56016	6.76286	2.07708	0.480432
chr13	13527868	13604542	uc007pmg.2	Nid1	9.13054	8.94393	3.66204	3.48043
chr9	50300629	50313744	uc009pjo.1	1600029D21Rik	7.53718	7.49647	2.07708	0.480432
chr2	151967344	151974832	uc008nex.1	Tcf15	9.52661	9.9178	4.07708	2.48043
chr7	148287117	148305705	uc012fwo.1	Ano9	7.5181	7.45554	2.07708	0.480432
chr12	20810252	20823640	uc007nde.2	1700030C10Rik	8.49768	8.7203	3.07708	0.480432
chr12	114146800	114169706	uc007pfl.1	Jag2	7.48572	8.10478	2.07708	4.18087
chr7	134130373	134160108	uc009jtw.2	Mvp	9.46594	9.73534	4.07708	5.23532
chr7	3216626	3218709	uc012ewc.1	Mir290	7.4301	7.31388	2.07708	0.480432
chr2	130509843	130525255	uc008mjv.1	Slc4a11	7.41642	7.69415	2.07708	3.65036
chr14	35165067	35170579	uc007tat.1	Fam25c	7.4003	7.82845	2.07708	0.480432
chr19	11851978	11895893	uc008gtb.1	Stx3	8.9783	8.61737	3.66204	2.06539
chr11	97457824	97484207	uc007lef.1	AK010368	7.37224	7.37002	2.07708	0.480432
chrX	132748510	132752052	uc009uig.1	Bex1	11.4452	11.6963	6.16454	6.63018
chr10	126766937	126780635	uc007hjf.1	Gli1	8.29588	8.74174	3.07708	1.48043
chrX	70882779	70888853	uc009tmb.1	Dusp9	10.2689	10.5103	5.07708	4.56789
chr7	36117255	36177306	uc009gjs.2	Rhpn2	8.26696	8.0577	3.07708	1.48043
chr16	93792394	93797133	uc007zzy.1	AK009785	7.25164	6.96595	2.07708	0.480432
chr3	53317859	53463277	uc008pey.1	Frem2	7.25164	7.20696	2.07708	2.48043
chr8	96694517	96697467	uc009mvv.1	Mt2	11.4737	11.3741	6.325	6.12429
chr3	104581973	104588935	uc008quk.1	Ppm1j	8.21656	8.39188	3.07708	1.48043
chr13	40980534	41056261	uc007qem.1	Gcnt2	7.18061	7.05084	2.07708	1.48043
chr6	43213642	43239319	uc009bso.2	Arhgef5	7.17521	7.43463	2.07708	0.480432
chr6	87861969	87886607	uc009cuh.1	8430410A17Rik	10.1752	9.84637	5.07708	5.93986
chr17	34040079	34043620	uc008bzy.1	BC033916	8.16978	8.20078	3.07708	2.48043
chr3	135146574	135234367	uc008rlv.2	Manba	9.49117	9.42406	4.399	4.06539
chr9	20818403	20833240	uc009ojx.1	Icam1	9.95366	10.1343	4.88443	5.06539
chr2	162912766	162917337	uc008nsm.1	Gtsf1l	8.13542	8.26733	3.07708	0.480432
chr11	100002125	100009233	uc007lkm.1	Krt19	7.10021	7.52642	2.07708	0.480432
chr18	80380977	80390308	uc008fsl.1	AK141205	8.0685	8.11796	3.07708	2.06539
chr9	99210385	99260949	uc009reb.1	Esyt3	7.05385	6.86016	2.07708	1.48043
chr1	137713174	137729918	uc007ctt.1	Lad1	7.009	7.29079	2.07708	2.06539
chr13	96281683	96297195	uc011zda.1	F2rl1	10.311	10.3352	5.399	4.72836
chr11	69210017	69213736	uc007jqc.2	Tmem88	6.98449	7.06452	2.07708	2.06539
chr7	134251283	134267543	uc009jug.1	Qprt	6.94694	6.86016	2.07708	0.480432
chr11	4116253	4122412	uc007hur.1	Gatsl3	7.93899	8.16315	3.07708	2.48043
chr7	31232784	31244534	uc009gel.1	Kirrel2	6.9342	7.05084	2.07708	2.06539
chr7	134277215	134283331	uc009jui.1	Spn	6.931	7.09148	2.07708	0.480432
chr2	121264762	121270597	uc008lzc.1	Ell3	6.92779	7.10478	2.07708	0.480432
chr12	77543483	77552323	uc007nyh.2	Gm10451	6.91163	6.38099	2.07708	0.480432
chr15	37160790	37293323	uc007vne.2	Grhl2	6.86541	7.11796	2.07708	0.480432
chr2	60131816	60223288	uc008jud.1	Ly75	6.86205	6.26733	2.07708	2.80236
chr16	16211437	16272805	uc007yid.1	Pkp2	8.82198	8.52642	4.07708	2.80236
chr11	69466874	69470123	uc007jqu.1	Sox15	6.8107	6.89118	2.07708	0.480432
chr5	128110631	128187890	uc008zsd.1	Glt1d1	7.8107	7.77122	3.07708	2.48043
chr6	42308485	42325267	uc009brc.1	Epha1	6.79317	6.67645	2.07708	2.06539
chr7	134232949	134237563	uc009juf.1	AI467606	6.77185	6.84439	2.07708	0.480432
chr7	4102861	4118301	uc009exe.1	Cdc42ep5	6.73927	7.44512	2.07708	1.48043
chr1	163070842	163100638	uc007dfj.2	Ankrd45	7.73376	7.51651	3.07708	1.48043
chr4	144802270	144838773	uc008vrt.1	Tnfrsf1b	6.73193	6.86016	2.07708	0.480432
chr10	18562876	18576878	uc007emz.1	Perp	9.52661	9.7203	4.88443	4.72836
chr7	31097834	31104064	uc009gec.1	AI428936	6.71341	7.09148	2.07708	0.480432
chr4	107854538	107892527	uc008uav.2	Zyg11a	6.70593	6.52642	2.07708	0.480432
chr17	28904261	28915649	uc008bro.2	Mapk13	6.69086	6.96595	2.07708	0.480432
chr1	194977305	194998229	uc007edy.1	Irf6	6.68707	6.622	2.07708	0.480432
chr11	84769255	84779556	uc007krg.2	Car4	6.62897	6.79603	2.07708	0.480432
chr16	8698812	8794401	uc007ycz.1	Usp7	6.62501	6.29079	2.07708	0.480432
chr10	33871198	33929357	uc007eus.1	Dse	9.62253	9.61968	5.07708	4.38732
chr15	83184276	83199727	uc007xaz.2	1700001L05Rik	6.62104	6.72891	2.07708	3.06539
chr13	62184506	62399530	uc007qwr.1	A130040M12Rik	8.60706	8.26733	4.07708	4.56789
chr11	100124195	100133185	uc007lku.1	Krt42	6.59295	7.19458	2.07708	0.480432
chr16	10168320	10175004	uc007yde.1	Rpl39l	6.54767	6.48634	2.07708	0.480432
chr5	97811227	97823349	uc008yfw.1	Naa11	6.54767	6.21924	2.07708	0.480432
chr17	68044604	68171985	uc008dkh.1	Lama1	9.12144	9.19768	4.66204	4.80236
chr1	168131515	168170875	uc007dkk.1	Mael	6.5181	5.98045	2.07708	0.480432
chr15	75721393	75726911	uc007whi.1	Naprt1	8.10306	8.24949	3.66204	4.48043
chr15	95965249	96116039	uc007xjz.1	AK163711	6.50953	6.42406	2.07708	0.480432
chr8	24261742	24269420	uc009len.1	Nkx6-3	6.49659	6.72891	2.07708	0.480432
chr8	73286671	73292562	uc009mbm.1	Ifi30	9.29526	9.49647	4.88443	4.48043
chr17	71193544	71202550	uc008dlp.2	Tgif1	7.47916	7.53627	3.07708	4.48043
chr8	80956907	80962551	uc009mhy.1	Pou4f2	6.47916	6.95131	2.07708	0.480432
chr2	121945843	122013925	uc008mae.1	Patl2	6.47477	6.40269	2.07708	0.480432
chr7	121774991	121781871	uc009jif.2	Calca	6.47477	6.35896	2.07708	0.480432
chr6	39355539	39372368	uc009blu.1	Mkrn1	7.47257	6.19458	3.07708	2.06539
chr9	30896174	30941384	uc009ori.1	St14	8.78876	9.11467	4.399	3.65036
chr1	72205806	72260881	uc007bkg.2	Mreg	10.627	10.6864	6.247	6.48043
chr3	10364972	10391005	uc008opu.1	Chmp4c	6.45707	6.92156	2.07708	1.48043
chr1	13103508	13119244	uc007aik.1	Prdm14	6.421	6.09148	2.07708	0.480432
chr3	102929478	102973656	uc008qsq.1	Dennd2c	7.99986	7.68532	3.66204	4.80236
chr8	34914428	35042313	uc009lkn.1	Rbpms	6.40262	5.69415	2.07708	1.48043
chr17	56418384	56431934	uc008dbn.1	Plin3	9.54662	9.67422	5.247	6.03502
chr7	6202311	6233463	uc012exi.1	Gm6792	6.3746	5.95131	2.07708	0.480432
chr3	83891855	83961708	uc008ppv.2	Mnd1	7.37224	6.99481	3.07708	3.06539
chr6	124380773	124416802	uc009dqw.2	Clstn3	7.95484	8.16315	3.66204	3.80236
chr12	77543483	77549685	uc011yoc.1	Gm10451	6.36514	5.98045	2.07708	0.480432
chr17	37138610	37147674	uc008clw.2	Zfp57	7.94217	7.55576	3.66204	2.80236
chr17	87151203	87232750	uc008duj.2	Epas1	9.12214	9.33941	4.88443	5.33841
chr6	82675020	82726448	uc009cll.2	Hk2	12.0736	12.1326	7.85844	8.22862
chr11	6406550	6422961	uc007hyt.2	Myo1g	6.28714	6.44512	2.07708	1.48043
chr11	69617096	69621126	uc007jrs.2	Tmem102	6.27709	6.40269	2.07708	0.480432
chr11	114710845	114733931	uc007mfw.2	Gprc5c	6.27203	6.11796	2.07708	2.06539
chr4	129103008	129120062	uc008uwy.1	Zbtb8b	6.23616	6.42406	2.07708	2.80236
chr5	24218086	24238498	uc008wsh.1	Wdr86	6.23616	6.58452	2.07708	0.480432
chr17	88069896	88123053	uc008dvb.1	Msh2	9.9362	9.68089	5.77752	6.38732
chr10	110355231	110376570	uc007gzs.2	Csrp2	11.1316	11.0344	6.98397	7.08034
chr12	110781607	110806804	uc007pau.2	Meg3	6.21525	6.19458	2.07708	0.480432
chr8	74840960	74845553	uc009mfq.2	Klf2	9.01808	9.40806	4.88443	5.28779
chr14	35186689	35217472	uc007tav.1	Mmrn2	7.20997	7.20696	3.07708	1.48043
chr9	72948204	72952250	uc009qqy.2	2410004A20Rik	6.20468	6.00902	2.07708	0.480432
chr4	133622366	133648419	uc008vdx.2	Aim1l	6.19403	6.86016	2.07708	0.480432
chr18	47079468	47093876	uc008evy.1	Gm949	6.18868	6.06452	2.07708	0.480432
chr9	57843847	57855258	uc009pvz.1	AK137397	6.18868	5.89118	2.07708	0.480432
chr10	119520663	119552021	uc007hes.2	Helb	8.76377	8.71164	4.66204	4.93986
chr2	32729653	32780773	uc008jhc.2	Fam129b	10.4216	10.7991	6.325	6.88982
chr11	33111793	33415746	uc007ikh.2	Ranbp17	7.1725	6.74599	3.07708	3.28779
chr14	71172187	71178301	uc007uoy.1	Dok2	7.16978	7.50652	3.07708	1.48043
chr9	58300979	58317430	uc009pwy.1	AK015493	6.16706	5.72891	2.07708	0.480432
chr15	75931917	75952625	uc007wio.1	Eppk1	6.16161	7.09148	2.07708	0.480432
chr3	14639726	14663002	uc008oqo.2	Car13	7.15339	7.0231	3.07708	2.80236
chr3	79687851	79750200	uc008pny.2	Fam198b	7.12564	7.00902	3.07708	2.80236
chr7	53181767	53204326	uc009gxz.1	Ccdc114	6.11722	6.622	2.07708	0.480432
chr14	65204951	65212798	uc007uil.1	AK044422	6.11157	6.67645	2.07708	2.80236
chr1	134010123	134038262	uc007coh.2	Cdk18	6.1059	6.50652	2.07708	1.48043
chr11	97488700	97493030	uc007leg.1	E130012A19Rik	11.0557	11.3673	7.03127	7.01959
chr3	30523188	30548740	uc008ovb.1	Lrrc34	6.10021	5.72891	2.07708	0.480432
chr7	31374699	31379961	uc009gfh.1	Zbtb32	6.083	6.00902	2.07708	0.480432
chr12	77893321	77898541	uc007nys.1	Gpx2	6.07722	6.29079	2.07708	0.480432
chr14	68369984	68553629	uc007ull.1	Dock5	7.07141	6.86016	3.07708	2.06539
chr14	99695909	99712628	uc007uvg.1	Klf5	7.0685	7.39188	3.07708	0.480432
chr7	20393810	20410104	uc009fnk.2	Bcl3	6.06558	6.58452	2.07708	0.480432
chr13	38241162	38290446	uc007qdk.2	Dsp	6.02411	5.46588	2.07708	0.480432
chr8	122134646	122140826	uc009nqa.2	Adad2	6.01203	6.48634	2.07708	0.480432
chr17	48558555	48574053	uc008cxx.1	Apobec2	5.99986	5.92156	2.07708	1.48043
chr6	148936590	149052202	uc009ett.1	Dennd5b	9.80284	9.13101	5.88443	6.38732
chr4	135097802	135131535	uc008vgr.1	Grhl3	8.31566	8.27323	4.399	3.93986
chr10	24313247	24318488	uc011xbr.1	Ctgf	11.0254	11.0654	7.12147	7.00399
chr7	31243076	31273628	uc009gen.1	Nphs1	5.96271	5.54605	2.07708	2.06539
chr1	91824536	91829751	uc007bzb.1	Gbx2	9.28463	9.39459	5.399	4.28779
chr2	104561943	104584958	uc008lke.1	Depdc7	7.54558	7.58452	3.66204	4.18087
chr5	130369592	130379492	uc008zto.1	Scand3	7.53928	7.19458	3.66204	4.48043
chr11	102437712	102442433	uc007lsd.1	AK144330	5.94376	5.82845	2.07708	0.480432
chr15	98708190	98713845	uc011zzb.1	Rhebl1	7.94058	7.89884	4.07708	4.48043
chr7	30032539	30035486	uc009gbj.2	2200002D01Rik	5.93739	5.46588	2.07708	0.480432
chr12	74201245	74216232	uc007nwb.1	Six4	8.51382	8.3366	4.66204	4.56789
chr10	21696477	21719708	uc011xbf.1	Sgk1	5.91812	5.3366	2.07708	0.480432
chr11	117827400	117832680	uc007moi.2	Socs3	10.3067	10.4876	6.46939	6.87275
chr7	134003028	134007531	uc009jte.1	Ino80e	5.89858	6.16949	2.07708	3.48043
chr14	26659640	26706290	uc007srv.2	Anxa11	7.47916	7.63122	3.66204	2.80236
chr17	35049410	35067381	uc008ceh.2	Slc44a4	5.892	6.56541	2.07708	0.480432
chr12	88562072	88581551	uc007oio.1	4933437F05Rik	5.8854	4.92156	2.07708	0.480432
chr16	56805273	56888276	uc007zmx.1	Tmem45a	5.8854	5.98045	2.07708	0.480432
chr10	94847995	94877743	uc007gwf.2	Socs2	5.8721	5.46588	2.07708	0.480432
chr17	23913884	23925044	uc008atl.1	Flywch2	5.8721	5.58452	2.07708	1.48043
chr2	162878370	162910423	uc008nsl.1	Mybl2	12.9506	13.1736	9.16454	9.37828
chr2	165816136	165898742	uc008nyi.2	Ncoa3	10.9905	10.9687	7.20636	7.15286
chr2	5819105	5865838	uc008iga.1	Dhtkd1	7.4414	7.24349	3.66204	2.80236
chr17	25013714	25018953	uc008ayn.1	Igfals	5.83832	6.56541	2.07708	0.480432
chr1	77363759	77513663	uc007bpz.1	Epha4	8.14788	7.90645	4.399	4.80236
chr15	98927914	98935138	uc007xou.1	Dnajc22	5.82457	5.86016	2.07708	0.480432
chr1	137219389	137264642	uc007cta.1	Lmod1	5.81766	5.65852	2.07708	1.48043
chr8	73888746	73893631	uc009mco.2	Use1	5.81766	5.29079	2.07708	3.06539
chrX	7626712	7650082	uc009sno.1	AK010638	5.81766	5.54605	2.07708	0.480432
chr18	35711063	35716884	uc008eme.1	AK088959	7.39334	7.3366	3.66204	5.43463
chr9	92143031	92167399	uc009ram.2	Plscr1	8.12704	8.03704	4.399	5.12429
chrX	136314219	136318892	uc009ukk.2	Ripply1	5.80372	5.79603	2.07708	0.480432
chr10	75294589	75299626	uc011xgs.1	Gstt2	5.80372	6.00902	2.07708	0.480432
chr17	47571587	47607587	uc008cvg.2	AI661453	5.7967	5.82845	2.07708	0.480432
chr8	14027564	14092327	uc009kyx.1	Erich1	6.7967	6.58452	3.07708	4.93986
chr7	147134294	147164876	uc012fvx.1	AK078239	5.7967	6.19458	2.07708	0.480432
chr18	61797306	61807126	uc008fch.1	AK143260	6.79317	6.24349	3.07708	2.06539
chr4	118213545	118218331	uc012dkb.1	Tmem125	5.77543	6.00902	2.07708	0.480432
chr16	34688701	34725280	uc007zbb.2	Ccdc14	6.76107	6.48634	3.07708	4.87275
chr17	80524810	80584372	uc008dqo.1	Galm	7.75203	7.622	4.07708	4.48043
chr7	130356379	130416765	uc009jph.1	Slc5a11	5.74657	6.00902	2.07708	1.48043
chr8	107991391	107997322	uc009ndc.2	Tppp3	6.73927	7.20696	3.07708	3.65036
chr2	109755803	109854414	uc008lmq.1	Lgr4	9.81982	9.56301	6.16454	6.09514
chr14	56470951	56493573	uc007uaz.2	Nynrin	9.02486	9.44512	5.399	4.93986
chr15	81808974	81811993	uc007wxv.2	1700029P11Rik	5.70218	5.86016	2.07708	0.480432
chr18	20714616	20763027	uc008ees.2	Dsg2	5.69464	5.42406	2.07708	0.480432
chr8	73406787	73418656	uc009mbz.2	Slc5a5	5.69464	5.79603	2.07708	0.480432
chr8	86534128	86537341	uc009mlp.1	AK008705	5.68707	5.19458	2.07708	0.480432
chr7	148522900	148548915	uc009kkt.1	Eps8l2	6.68327	6.84439	3.07708	1.48043
chr8	109912124	109929105	uc009nhq.1	Nqo1	9.931	9.85427	6.325	6.38732
chr5	104418783	104452815	uc008yjy.1	Hsd17b11	5.67946	5.79603	2.07708	3.93986
chr12	114023208	114042868	uc007pff.1	Ahnak2	6.6718	6.90645	3.07708	4.06539
chr16	48281847	48294405	uc007zjl.1	Dppa4	5.6718	5.29079	2.07708	0.480432
chr2	168573831	168594701	uc008obf.1	Sall4	5.66411	6.06452	2.07708	0.480432
chr2	153048105	153053177	uc008nhi.2	Tspyl3	5.6486	5.622	2.07708	2.48043
chr1	136300604	136306576	uc007crw.1	Cyb5r1	7.23356	7.19458	3.66204	2.06539
chr4	10915808	10936766	uc008ryw.2	Plekhf2	10.8932	10.8264	7.325	7.19468
chr10	82211444	82228886	uc007gjv.1	Nfyb	5.64078	5.42406	2.07708	3.28779
chr3	54983965	55013879	uc008pgi.2	Sohlh2	5.64078	5.76286	2.07708	0.480432
chr17	6942479	6989129	uc008ahv.1	Ezr	11.1937	11.4167	7.63167	7.99613
chr4	146602368	146705629	uc008vsv.1	Gm13154	5.62501	5.19458	2.07708	0.480432
chr5	93470148	93476048	uc008ydw.1	Ankrd56	5.62501	5.29079	2.07708	0.480432
chr12	106942191	107020657	uc007oyt.1	Ak7	5.61706	5.50652	2.07708	0.480432
chr17	75115089	75262910	uc008dok.2	Ttc27	5.60907	5.42406	2.07708	3.28779
chr1	166367397	166390486	uc007dip.1	Atp1b1	9.30951	9.54361	5.77752	6.23532
chr5	117762526	117767654	uc008zfm.1	AK132074	8.41413	8.03008	4.88443	5.23532
chr2	4838041	4859789	uc008ifd.2	Phyh	7.60506	7.31388	4.07708	4.65036
chrX	140750508	140808991	uc009umu.2	Alg13	8.40839	8.14395	4.88443	4.56789
chr3	97364670	97416113	uc008qow.1	Chd1l	5.59295	4.86016	2.07708	3.48043
chr7	147963127	147975753	uc009kid.2	Syce1	5.57665	5.622	2.07708	0.480432
chr17	14332236	14342838	uc008amv.2	Dact2	7.89693	8.1245	4.399	3.80236
chr6	122677826	122694763	uc012esg.1	Slc2a3	9.36751	8.92531	5.88443	6.38732
chr6	122461693	122479305	uc009dpi.1	Mfap5	5.55184	5.622	2.07708	0.480432
chr8	18593172	18803188	uc009kzt.1	Mcph1	7.13402	7.00902	3.66204	4.06539
chr5	5736321	5751317	uc008wjb.2	Steap1	7.54348	7.51651	4.07708	4.06539
chr11	61495911	61523452	uc007jid.1	Fam83g	6.54348	6.99481	3.07708	2.80236
chr17	29033339	29054269	uc008bru.1	4930539E08Rik	5.54348	5.89118	2.07708	0.480432
chr7	52823732	52845078	uc009gwd.1	Bcat2	9.23745	9.4633	5.77752	5.97228
chr18	66616257	66625212	uc008fft.1	Pmaip1	8.70593	8.67199	5.247	5.00399
chr10	75493356	75505714	uc007ftw.2	Zfp280b	9.92819	9.89884	6.46939	6.88982
chr4	134064913	134079837	uc008vfg.1	2610002D18Rik	7.84853	7.93651	4.399	5.38732
chr2	31922404	31941225	uc008jek.1	Fam78a	5.5181	5.14395	2.07708	3.80236
chr3	96218359	96220756	uc008qmy.1	Terc	10.8004	10.8374	7.36248	8.06539
chr7	146765274	146770696	uc012fvu.1	Nkx6-2	6.51382	7.05084	3.07708	4.06539
chr15	79746242	79765076	uc007wux.1	Cbx7	7.0945	6.74599	3.66204	3.80236
chr5	116858503	116874873	uc008zez.1	Hspb8	8.31443	8.18834	4.88443	4.06539
chr4	149491452	149518277	uc008vxk.1	Slc2a5	5.50092	5.72891	2.07708	0.480432
chr4	145258599	145294340	uc008vsb.1	Gm13242	5.49226	5.86016	2.07708	0.480432
chr6	72335214	72342661	uc009cin.2	Vamp8	7.4879	7.55576	4.07708	5.00399
chr3	89633291	89662768	uc008qae.2	She	5.47477	5.50652	2.07708	1.48043
chr7	30967189	30971049	uc009gdp.1	Cox7a1	5.47477	5.29079	2.07708	3.28779
chr16	37775140	37836602	uc007zej.1	Fstl1	10.1544	10.0019	6.77752	7.31332
chr14	45996095	46010471	uc007tgp.1	Gnpnat1	8.76377	8.62661	5.399	5.48043
chr3	87750614	87757294	uc008ptk.1	Crabp2	6.4301	6.31388	3.07708	0.480432
chr14	123290081	123314387	uc011zqm.1	A2ld1	6.4301	6.21924	3.07708	4.65036
chr1	60540028	60625609	uc007bes.1	Raph1	7.41871	7.07806	4.07708	4.93986
chr13	63372306	63396476	uc007qxm.1	apo	5.41184	5.50652	2.07708	0.480432
chr3	99942102	99968326	uc008qqo.2	Wdr3	7.72639	7.29079	4.399	4.72836
chr19	23126039	23152414	uc008gzx.1	BC044868	5.40262	5.65852	2.07708	0.480432
chr5	114704172	114725770	uc008yzk.1	Foxn4	5.39334	5.50652	2.07708	0.480432
chr6	122267748	122290882	uc009doz.1	Phc1	5.39334	5.46588	2.07708	2.06539
chr8	119098299	119258891	uc009noi.1	Cdyl2	8.85108	8.95131	5.53651	6.06539
chr11	88829731	88843964	uc007kvz.1	Coil	5.3746	4.92156	2.07708	0.480432
chr8	72344463	72355001	uc009lxw.1	Lpar2	7.37224	7.34782	4.07708	4.72836
chr8	123132501	123160282	uc009nre.1	1190005I06Rik	7.37224	7.93651	4.07708	4.06539
chr8	77615516	77624492	uc009mhc.2	Hmox1	11.742	11.8772	8.45212	8.685
chr5	138046334	138054632	uc009adb.1	Pcolce	10.8553	11.0534	7.56893	7.59937
chr4	40751634	40803031	uc008shw.1	B4galt1	8.93819	8.97322	5.66204	5.83798
chr2	119566072	119576989	uc008luf.1	Itpka	6.35084	6.35896	3.07708	4.48043
chr11	69486611	69497472	uc007jrb.2	Senp3	6.34603	6.64038	3.07708	4.87275
chr13	97946285	97970312	uc007roc.2	Hexb	9.8024	9.52147	6.53651	6.78421
chr11	69664064	69674232	uc007jsb.2	Tnk1	6.34122	5.98045	3.07708	1.48043
chr10	127078041	127098043	uc007hka.1	Stat6	8.50631	8.41875	5.247	5.06539
chr7	79222715	79453481	uc009hnp.1	Mctp2	5.33638	5.14395	2.07708	1.48043
chr11	43493499	43520695	uc007imu.2	Pwwp2a	5.32667	5.38099	2.07708	3.28779
chr8	108496248	108509779	uc009neu.1	AK139607	5.32667	5.58452	2.07708	0.480432
chr6	70904599	70911060	uc012ene.1	Foxi3	5.32667	5.86016	2.07708	0.480432
chr1	188789294	188794506	uc007dzs.1	D1Pas1	5.31689	4.92156	2.07708	0.480432
chr5	74335620	74339615	uc008xtf.1	AK144862	5.31689	5.19458	2.07708	1.48043
chr1	175348734	175396167	uc011wws.1	Aim2	6.30704	5.72891	3.07708	0.480432
chr17	88372389	88390232	uc008dvd.2	Msh6	11.8867	11.7284	8.66204	8.73782
chr4	56823806	56880083	uc008sxu.2	Ctnnal1	8.9968	8.38645	5.77752	5.48043
chr18	37800144	37805858	uc008eqi.2	Taf7	8.75565	8.55576	5.53651	5.18087
chr19	37507330	37515221	uc008hio.1	Hhex	5.28714	5.65852	2.07708	1.48043
chr8	55160885	55271808	uc009lsc.1	Vegfc	5.28714	4.98045	2.07708	3.93986
chrX	53625762	53631647	uc009tgd.2	Ncrna00086	6.28212	6.00902	3.07708	3.48043
chr8	28336247	28342060	uc009lie.1	Adrb3	5.27709	4.58452	2.07708	0.480432
chr9	95536046	95595970	uc009rbg.1	Pcolce2	8.43802	8.45034	5.247	5.00399
chr2	104397340	104411586	uc008ljw.1	AK015665	5.26696	4.79603	2.07708	0.480432
chr2	157942140	157974128	uc008npr.1	Tgm2	5.26696	5.42406	2.07708	2.80236
chr4	118779349	118809934	uc008ule.2	Slc2a1	11.8922	12.3035	8.70643	8.75656
chr9	57349908	57353254	uc009puy.1	Rpp25	9.43067	9.67867	6.247	5.56789
chr4	148176500	148329001	uc008vvn.2	Casz1	5.25677	5.42406	2.07708	1.48043
chr6	100178558	100239352	uc009dbw.1	Rybp	9.90021	9.7332	6.72093	6.67026
chr6	39347819	39371775	uc009blq.1	Mkrn1	5.2465	5.38099	2.07708	0.480432
chr4	142857324	142891410	uc008vqa.1	Pdpn	9.69747	9.53381	6.53651	7.38732
chr7	19862155	19867398	uc009flg.1	Ppm1n	5.23616	5.58452	2.07708	1.48043
chr9	95653060	95747698	uc009rbk.2	Pls1	5.23616	5.65852	2.07708	2.48043
chr2	167904503	167926703	uc008oao.2	Pard6b	8.04351	8.30238	4.88443	4.72836
chr4	129030875	129057272	uc008uww.1	Zbtb8a	9.47861	9.63809	6.325	6.93986
chr4	140855154	140885293	uc008voc.1	Epha2	12.1206	12.4214	8.97189	9.01571
chr17	66697305	66730271	uc008djx.1	1110012J17Rik	5.22574	5.54605	2.07708	2.06539
chr18	67777050	67802990	uc008fmr.1	Cep76	5.22574	4.92156	2.07708	3.80236
chr16	90751771	90812658	uc007zwm.2	Urb1	10.0316	10.118	6.88443	7.78421
chr19	4040287	4044221	uc008fyg.1	Gstp2	6.2205	6.03704	3.07708	3.06539
chr1	165884138	165926912	uc007dhu.1	BC055324	5.21525	4.14395	2.07708	2.06539
chr10	43670112	43726652	uc007ezq.2	Aim1	5.21525	4.98045	2.07708	2.06539
chr3	88345950	88354201	uc008pvn.1	Rab25	5.21525	5.09148	2.07708	1.48043
chr14	51443735	51492229	uc007tlt.1	Tep1	6.20997	6.16949	3.07708	0.480432
chr11	116081872	116101405	uc007mkp.1	Evpl	6.20468	6.48634	3.07708	2.80236
chr2	129022508	129030840	uc008mhk.2	Slc20a1	6.19936	6.24349	3.07708	3.93986
chr13	66470020	66855919	uc007qzp.1	AK049212	5.19403	5.54605	2.07708	0.480432
chr5	23868636	23890292	uc008wrd.2	Nos3	5.19403	5.42406	2.07708	3.28779
chr8	109415539	109446994	uc009ngr.2	Cirh1a	11.8752	11.682	8.76358	8.82473
chr12	92921017	92926553	uc007oku.1	AK158157	5.1833	4.79603	2.07708	1.48043
chr17	56136501	56146991	uc008dao.1	Stap2	5.1725	5.46588	2.07708	2.80236
chr3	40601872	40612335	uc008pbn.1	Plk4	8.33638	8.0231	5.247	4.93986
chr13	12485641	12531160	uc007plk.1	Heatr1	9.86457	9.46845	6.77752	6.95617
chr8	24519973	24560104	uc009lev.2	Sfrp1	9.96779	10.0196	6.88443	6.56789
chr2	69262391	69426124	uc008jyc.1	Lrp2	7.48135	7.41341	4.399	4.06539
chr2	120963027	120968434	uc008lxn.2	Lcmt2	8.15887	7.46588	5.07708	5.43463
chr16	17231679	17263523	uc007yko.1	Hic2	9.48026	9.51899	6.399	6.12429
chr12	103806792	103945079	uc007ouj.1	Itpk1	10.8767	11.0081	7.805	8.14577
chr9	37294905	37331735	uc009ouy.1	BC024479	8.31689	8.31959	5.247	5.60971
chr7	29788358	29912170	uc009gao.1	Ryr1	6.72455	6.79603	3.66204	3.28779
chr7	133989066	133996219	uc009jtb.1	Doc2a	5.12844	5.29079	2.07708	0.480432
chr8	87433234	87446814	uc009moc.1	Dnase2a	5.12844	4.58452	2.07708	1.48043
chr17	41012430	41019507	uc008com.2	9130008F23Rik	5.11722	4.86016	2.07708	0.480432
chr4	133034047	133043855	uc008vct.2	Fam46b	6.69842	6.99481	3.66204	4.06539
chrX	49625603	49969151	uc009teg.2	Gpc3	5.1059	5.58452	2.07708	1.48043
chr7	52728932	52746166	uc009gvj.1	Dhdh	6.10021	6.74599	3.07708	3.48043
chr1	134086012	134106123	uc007coi.2	Lemd1	8.09878	8.29079	5.07708	4.72836
chr2	4911769	4935837	uc008ifi.2	Mcm10	6.68327	6.00902	3.66204	3.48043
chr9	58135529	58163019	uc009pwv.2	Loxl1	6.68327	7.07806	3.66204	3.48043
chr7	91733669	91756452	uc009iej.2	Fah	7.41871	7.47615	4.399	3.65036
chr15	84060472	84146039	uc007xby.1	Parvb	9.00367	9.4214	5.98397	6.15286
chr7	30072338	30078409	uc009gbn.1	Ppp1r14a	5.0945	5.69415	2.07708	2.80236
chr7	88200485	88250498	uc009ibr.1	Alpk3	5.0945	5.38099	2.07708	0.480432
chr9	96017847	96080544	uc009rbz.1	Gk5	5.0945	5.42406	2.07708	1.48043
chr4	98421582	98486228	uc008tuk.2	Kank4	6.6718	6.77954	3.66204	4.72836
chr2	152163160	152171796	uc008nff.1	Trib3	7.66988	7.8042	4.66204	4.56789
chr7	52667064	52672549	uc009gva.1	Ntf5	5.083	4.72891	2.07708	0.480432
chr14	55186308	55198253	uc007twj.1	Jub	9.72316	10.0981	6.72093	7.20835
chr18	13128760	13151457	uc008eda.1	Impact	10.0335	10.0405	7.03127	7.12429
chr9	42932021	43015838	uc009pbe.1	Pou2f3	5.07141	5.24349	2.07708	0.480432
chr9	50547795	50556626	uc009pki.1	2310030G06Rik	5.07141	5.29079	2.07708	1.48043
chr1	95689152	95700511	uc007cek.2	Dtymk	9.81766	9.32812	6.83196	6.93986
chr15	10376517	10402271	uc007vgc.2	Dnajc21	7.384	6.87575	4.399	3.06539
chr12	74644100	74649382	uc007nwm.1	Tmem30b	5.05973	5.50652	2.07708	0.480432
chr8	59964850	59987674	uc009lsv.1	AK141659	5.05973	4.92156	2.07708	3.06539
chrX	7245241	7250404	uc009slx.1	Plp2	9.96506	10.144	6.98397	7.10979
chr12	17549678	17558308	uc007ncv.1	Odc1	14.1258	13.9053	11.1459	11.4527
chr19	4861222	4879884	uc008gbf.1	Actn3	6.64078	6.48634	3.66204	1.48043
chrX	96235919	96270067	uc009tvg.2	Stard8	6.05385	6.29079	3.07708	3.06539
chr1	72351994	72441527	uc007bkl.2	Xrcc5	10.692	10.3824	7.72093	7.98823
chr6	56651056	56656693	uc009cbj.2	Lsm5	9.44027	8.95865	6.46939	7.28779
chr5	44258065	44303613	uc008xic.2	Cd38	6.04795	6.50652	3.07708	2.48043
chr7	134854249	134861699	uc009jwm.1	Ctf1	5.04795	5.46588	2.07708	2.48043
chr12	74142813	74149699	uc007nwa.2	Six1	6.04203	6.06452	3.07708	0.480432
chr4	138526819	138615086	uc008vlp.2	Tmco4	6.04203	6.40269	3.07708	4.28779
chr8	114388797	114402575	uc009nmy.1	Tmem170	8.20997	8.28496	5.247	5.00399
chr2	71225316	71279679	uc008kaq.1	Hat1	9.03906	8.67645	6.07708	6.48043
chr11	121372289	121382656	uc007mvz.2	Zfp750	5.03608	5.50652	2.07708	2.48043
chr4	132794732	132808843	uc008vck.1	Map3k6	5.03608	5.65852	2.07708	3.80236
chr2	71709328	71723683	uc008kbh.1	Pdk1	5.02411	4.58452	2.07708	1.48043
chr4	122780407	122803334	uc008uot.1	Bmp8b	5.02411	4.92156	2.07708	0.480432
chr8	114413034	114436099	uc009nmz.1	Chst5	5.02411	4.79603	2.07708	2.06539
chr11	34932957	35522009	uc007ild.2	Slit3	5.01203	5.14395	2.07708	0.480432
chr14	104861540	104869216	uc007uxb.1	Pou4f1	5.01203	4.92156	2.07708	1.48043
chr15	9363782	9395790	uc007vfn.1	Capsl	5.01203	4.58452	2.07708	0.480432
chr12	82815936	82884157	uc007oco.2	Map3k9	7.009	7.19458	4.07708	3.06539
chr13	35986972	36000216	uc011yyj.1	Rpp40	8.00444	7.96595	5.07708	5.33841
chr11	69776922	69781388	uc007jtb.2	Cldn7	4.99986	4.92156	2.07708	0.480432
chr11	117470560	117474731	uc007mnh.2	2900041M22Rik	4.99986	5.42406	2.07708	0.480432
chr13	51501986	51518166	uc007qmf.2	S1pr3	4.99986	5.50652	2.07708	2.80236
chr5	145025393	145120981	uc009alq.1	Baiap2l1	4.99986	4.72891	2.07708	0.480432
chr4	116492511	116496113	uc008uho.1	Hpdl	7.31443	7.47615	4.399	4.65036
chr4	147451169	147464173	uc008vtz.1	Agtrap	9.79977	9.94208	6.88443	6.98823
chr11	96111082	96124288	uc007lbm.1	AK078566	4.98758	4.79603	2.07708	0.480432
chr11	88785333	88818756	uc007kvx.2	Scpep1	4.9752	4.72891	2.07708	2.80236
chr11	5428890	5444220	uc007hwp.2	Ccdc117	9.55237	9.22534	6.66204	6.56789
chr18	46872858	46889996	uc008evt.1	Cdo1	6.55184	6.35896	3.66204	3.65036
chr4	82866204	82972093	uc008tkq.1	Ttc39b	8.28589	8.03008	5.399	4.48043
chr16	33955097	33969089	uc007zap.1	Umps	5.96271	5.09148	3.07708	3.93986
chr7	127329897	127347502	uc009jmk.1	Crym	4.96271	4.72891	2.07708	0.480432
chr9	58068856	58099593	uc009pwr.1	Pml	4.96271	5.46588	2.07708	3.48043
chr4	46617261	46665071	uc008suf.1	Tbc1d2	7.96114	8.27911	5.07708	4.65036
chr4	55540008	55547347	uc008sxk.2	Klf4	8.66025	8.83644	5.77752	5.65036
chr1	169278121	169298661	uc007dkx.1	Aldh9a1	10.1917	10.0266	7.325	7.00399
chr7	97103163	97131486	uc009igk.2	Eed	9.94376	9.70073	7.07708	7.46912
chr2	151396367	151415735	uc008nec.1	Sdcbp2	4.93739	5.03704	2.07708	0.480432
chr7	150152726	150157169	uc009koj.2	Ascl2	5.93739	6.19458	3.07708	1.48043
chr9	44242316	44250951	uc009pdr.1	Foxr1	4.93739	4.86016	2.07708	0.480432
chr8	59027930	59072736	uc009lsr.1	Fbxo8	5.931	5.79603	3.07708	3.80236
chr12	56401623	56483478	uc007nop.2	1110008L16Rik	7.73376	7.59398	4.88443	5.28779
chr10	75385968	75397208	uc007fto.1	Mmp11	4.92457	4.65852	2.07708	2.06539
chr8	126543407	126572404	uc012gmt.1	mKIAA0133	6.50523	6.11796	3.66204	4.18087
chr10	83834063	83905216	uc007gko.1	Nuak1	7.24134	7.60338	4.399	4.38732
chr2	154161121	154200455	uc008njb.1	Cdk5rap1	8.23745	8.09815	5.399	5.93986
chr17	84589395	84867548	uc012axy.1	Thada	6.49659	6.11796	3.66204	4.38732
chr2	103907961	103931347	uc008ljm.1	Cd59b	4.91163	4.72891	2.07708	0.480432
chr6	71241758	71252712	uc012enf.1	Gm1070	4.91163	4.98045	2.07708	0.480432
chr12	25334235	25347647	uc007neo.2	Klf11	7.49443	7.58452	4.66204	5.33841
chr13	64464521	64473614	uc007qyw.1	Ctsl	11.2475	11.2988	8.41693	8.33841
chr4	45809893	45817480	uc008ssx.1	Aldh1b1	6.49226	6.42406	3.66204	4.38732
chr11	33054924	33065056	uc007ike.1	Npm1	8.06996	7.70292	5.247	5.56789
chrX	90868414	90879494	uc009tst.1	Pola1	7.2205	6.29079	4.399	4.72836
chr9	65476388	65508325	uc009qdt.1	Rbpms2	4.89858	4.86016	2.07708	2.06539
chr10	128141313	128157294	uc007hob.1	Pmel	6.892	6.98045	4.07708	3.06539
chr19	6398582	6415216	uc008gip.1	Rasgrp2	5.892	6.09148	3.07708	2.48043
chr1	63490477	63615668	uc007bge.1	Adam23	4.8854	5.09148	2.07708	0.480432
chr4	106263513	106291843	uc012dhz.1	BC055111	4.8854	5.29079	2.07708	0.480432
chr6	120614438	120721209	uc009dno.2	Cecr2	9.12424	9.09482	6.325	6.52483
chr11	3929784	3948012	uc007hue.1	Sec14l4	4.8721	5.19458	2.07708	0.480432
chr6	135013679	135034726	uc009ele.2	Gprc5a	5.86541	6.16949	3.07708	0.480432
chr14	68699940	68705794	uc007uln.1	Nefl	8.1833	8.35896	5.399	5.80236
chr11	66864171	66880942	uc007jlu.1	Sco1	5.85193	5.98045	3.07708	4.18087
chr3	151994358	152005371	uc008rtg.2	Fam73a	5.85193	5.29079	3.07708	4.06539
chr11	101592269	101628671	uc007lpr.1	Dhx8	10.956	10.9234	8.1856	8.52483
chr1	71650681	71669393	uc007bkb.1	Fn1	4.84514	5.19458	2.07708	2.06539
chr10	127733195	127737140	uc007hmc.1	Il23a	4.84514	4.58452	2.07708	0.480432
chr11	8445695	8566538	uc007hzl.1	Tns3	5.84514	6.14395	3.07708	4.28779
chr4	45329501	45335475	uc008ssk.1	Exosc3	7.63882	7.25546	4.88443	5.00399
chr8	125933463	125945910	uc009nvt.1	Tubb3	10.2507	10.5387	7.50334	7.45771
chr16	30561454	30589675	uc007ywv.1	Lsg1	8.28087	8.07131	5.53651	6.03502
chr3	100275458	100295115	uc008qqu.2	Fam46c	4.81766	4.3366	2.07708	2.06539
chr5	151060504	151300328	uc009atv.2	Fry	4.81766	5.24349	2.07708	2.48043
chr8	3565997	3584776	uc009krv.1	C330021F23Rik	4.81766	4.86016	2.07708	0.480432
chr7	31247182	31252610	uc012fhq.1	Nphs1as	4.81766	5.29079	2.07708	0.480432
chr17	32587667	32630265	uc008bxe.1	Cyp4f39	4.80372	5.38099	2.07708	0.480432
chr7	106959948	106978927	uc009imc.1	Neu3	5.78964	5.54605	3.07708	3.93986
chr4	57203712	57316709	uc008sya.2	Ptpn3	7.95327	7.88349	5.247	4.65036
chr14	66605623	66630047	uc007ujt.1	Gulo	4.77543	4.42406	2.07708	0.480432
chr2	149654518	149830128	uc012cfp.1	Tmem90b	4.77543	4.65852	2.07708	0.480432
chr2	164628613	164647627	uc008nwh.1	Zswim3	7.77364	7.65852	5.07708	5.38732
chr4	40915975	40973025	uc008sie.1	Nfx1	7.76827	7.90645	5.07708	5.93986
chr9	44923958	44938153	uc009pfg.1	Scn2b	4.76107	4.98045	2.07708	2.06539
chr7	147995575	148010077	uc009kie.1	Zfp941	6.75746	6.35896	4.07708	3.80236
chr11	8331654	8566538	uc007hzk.1	Tns3	9.96427	10.2039	7.28653	7.51385
chr11	119087885	119126526	uc007mqc.1	Ccdc40	6.33638	6.3366	3.66204	2.06539
chr11	97897937	97916776	uc007lfl.1	Stac2	4.74657	5.19458	2.07708	0.480432
chr11	98819784	98836256	uc007lhz.2	Rara	4.74657	5.19458	2.07708	3.80236
chr4	45822378	45841699	uc008ssy.1	Igfbpl1	5.74657	5.72891	3.07708	4.56789
chr1	55134677	55146776	uc007bab.2	Hspd1	13.2071	12.8806	10.5406	10.5425
chr15	102273797	102285070	uc007xvq.2	Amhr2	5.73927	5.86016	3.07708	0.480432
chr12	114388222	114392090	uc007pfz.1	Crip1	7.05973	7.39188	4.399	4.56789
chr1	51522850	51537243	uc007axm.1	Nabp1	4.73193	4.50652	2.07708	0.480432
chr11	87428665	87473044	uc007kuc.1	Hsf5	4.73193	4.50652	2.07708	2.06539
chr19	47087187	47098836	uc008huk.1	Ina	8.63193	8.75866	5.98397	5.9067
chr3	69523976	69552968	uc008pml.1	Nmd3	8.04647	7.59398	5.399	6.26179
chr8	113794843	113826122	uc009nmb.1	Rfwd3	11.0235	10.8699	8.38086	8.48043
chr1	74419776	74432625	uc007bly.2	Slc11a1	4.71713	5.09148	2.07708	0.480432
chr17	47836919	47840945	uc008cwa.1	AK076701	4.71713	4.3366	2.07708	0.480432
chr8	59961498	59968657	uc009lsu.2	Sap30	10.1417	9.85032	7.50334	7.71884
chr3	101179047	101266983	uc008qrg.2	Igsf3	8.41413	8.39729	5.77752	4.93986
chr14	20959279	21003004	uc007siz.1	Kcnk5	8.95957	9.13426	6.325	7.12429
chr15	51869652	51877269	uc007vre.1	Aard	8.61207	8.67199	5.98397	6.45771
chr7	4723979	4731743	uc009eyo.2	Il11	4.70218	4.79603	2.07708	0.480432
chr5	150919244	151151580	uc009ats.1	Fry	7.50953	7.09148	4.88443	4.87275
chr7	87375778	87386306	uc009hzu.1	D330012F22Rik	7.27709	7.26733	4.66204	5.72836
chr6	58544665	58642445	uc009cdb.1	Abcg2	8.68992	8.26141	6.07708	6.56789
chr2	164665017	164685208	uc008nwn.1	Pltp	8.85784	8.90645	6.247	6.45771
chr1	138590787	138622305	uc007cuy.1	AK051055	4.68707	4.50652	2.07708	0.480432
chr7	35129738	35176559	uc009gjd.1	Lsm14a	5.68707	5.50652	3.07708	4.56789
chr18	60633844	60663637	uc008fag.1	2010002N04Rik	8.00748	7.8042	5.399	5.52483
chr18	35276565	35414429	uc008ely.1	Ctnna1	10.6383	10.3548	8.03127	8.05786
chr7	127243939	127264500	uc009jmh.1	Tmem159	6.26187	6.46588	3.66204	3.06539
chr5	23889998	23899961	uc008wrf.1	Atg9b	6.6718	6.48634	4.07708	3.65036
chr8	72564711	72590810	uc009lyn.1	Sugp1	6.6718	6.21924	4.07708	4.28779
chr4	146032924	146036119	uc008vsj.1	OTTMUSG00000010105	4.6718	4.79603	2.07708	1.48043
chrX	50339254	50374837	uc009ter.1	Hprt	9.98527	9.63809	7.399	7.67026
chr18	53841376	53906201	uc008exy.1	Cep120	7.2465	7.25546	4.66204	5.06539
chr1	4763278	4777807	uc007aff.2	Mrpl15	10.1424	9.61505	7.56893	8.08776
chr17	28726536	28761399	uc008bri.1	Srpk1	6.96271	5.89118	4.399	4.80236
chr11	101052428	101089764	uc011yfk.1	Ezh1	6.96271	6.99481	4.399	3.48043
chr1	154652386	154684120	uc007czm.1	Ncf2	4.64078	4.79603	2.07708	0.480432
chr10	79857924	79860340	uc007gdc.1	Mbd3	4.64078	5.09148	2.07708	2.48043
chr12	92871448	93026876	uc007okt.2	Ston2	8.22574	8.27323	5.66204	5.68989
chr7	20301992	20336922	uc009fnd.2	Pvrl2	8.33759	8.40806	5.77752	6.5028
chr5	102192148	102252871	uc008yio.1	Cds1	6.95011	6.72891	4.399	2.48043
chr8	48912963	49077905	uc009lrm.1	Wwc2	9.48518	9.49141	6.93506	7.05029
chr10	126662750	126702419	uc007his.2	Kif5a	4.62501	4.14395	2.07708	2.80236
chr11	113561519	113572840	uc011yhd.1	Cpsf4l	4.62501	4.98045	2.07708	1.48043
chr7	148399758	148404557	uc009kka.1	Rassf7	8.08011	8.46072	5.53651	6.09514
chr10	61109368	61136913	uc007fge.1	Ppa1	11.7181	11.5804	9.17511	9.41412
chr3	121424454	121437970	uc008ree.2	F3	6.61706	6.622	4.07708	4.06539
chr4	124612291	124621905	uc008url.1	9930104L06Rik	6.93739	7.07806	4.399	4.80236
chr7	52880906	52894462	uc009gwi.1	Rasip1	7.421	7.55576	4.88443	5.72836
chr10	80390835	80394949	uc007gfl.1	Gadd45b	7.61307	7.73748	5.07708	5.06539
chr12	113382418	113419958	uc007pem.1	Kif26a	6.60907	7.13101	4.07708	5.68989
chr6	127639028	127720747	uc009dwb.1	Prmt8	4.60907	4.58452	2.07708	0.480432
chr1	179693308	179728640	uc007dut.1	Adss	8.30209	8.1758	5.77752	5.76583
chr19	47163255	47205635	uc008hup.1	Pdcd11	10.5988	10.594	8.07708	8.54652
chr8	128517001	128554585	uc009nyr.2	Kcnk1	8.05532	8.10478	5.53651	4.65036
chr16	30269387	30285340	uc007ywn.2	Lrrc15	4.59295	4.72891	2.07708	1.48043
chr11	69391860	69403364	uc011xww.1	Trp53	4.59295	4.3366	2.07708	3.48043
chr7	17577936	17581994	uc012fak.1	Ccdc8	5.59295	5.50652	3.07708	2.48043
chr9	41776571	41934372	uc009pap.1	Sorl1	7.91001	8.0577	5.399	6.36307
chr10	79449344	79458145	uc007gaz.1	Cnn2	9.79626	10.0491	7.28653	7.78421
chr17	79733364	79756431	uc008dpx.1	Cdc42ep3	6.90512	6.72891	4.399	4.65036
chr7	38883002	38894509	uc009gkr.1	Ccne1	12.0489	12.0819	9.54468	9.48886
chr8	126421022	126475165	uc009nws.2	Nup133	10.3881	10.239	7.88443	8.18779
chr1	145454628	145551814	uc007cwx.1	Cdc73	7.5787	7.54605	5.07708	5.28779
chr14	35183459	35189855	uc007tau.2	Sncg	4.57665	5.14395	2.07708	0.480432
chr15	101240833	101258237	uc007xtd.2	Krt7	4.57665	4.58452	2.07708	2.48043
chr3	95040841	95047031	uc008qiw.1	Gm128	4.57665	5.09148	2.07708	0.480432
chr11	106110457	106119116	uc007lym.1	Ftsj3	10.9149	10.8893	8.41693	8.79331
chr12	73860197	73895927	uc007nvu.2	Ppm1a	5.56843	5.50652	3.07708	3.48043
chr10	62407776	62436936	uc007fjj.2	Dna2	7.3746	7.55576	4.88443	4.06539
chr13	100892809	100907653	uc007rqh.1	Smn1	8.14926	7.75445	5.66204	5.87275
chr6	127035133	127061570	uc009dvq.2	9630033F20Rik	10.2063	10.1837	7.72093	7.82028
chr4	137297646	137354292	uc008vjr.2	Alpl	10.0852	10.4267	7.60064	7.3508
chr18	61178515	61197853	uc008fbj.2	Cdx1	4.56016	4.86016	2.07708	0.480432
chr7	50072198	50124604	uc009gmf.1	Gm5595	4.56016	4.3366	2.07708	1.48043
chr5	20928720	20987942	uc008woo.2	Fam185a	7.14235	6.92156	4.66204	5.33841
chr1	42906077	42962528	uc007ava.2	Mrps9	7.72455	7.77954	5.247	6.20835
chr7	30862355	30877529	uc009gdd.1	Zfp566	6.13958	6.14395	3.66204	3.48043
chr1	59536990	59543799	uc011wlq.1	Fzd7	10.198	10.359	7.72093	7.68989
chr5	92844565	92866225	uc008ydk.1	Nup54	8.87461	8.60806	6.399	6.18087
chr19	23213715	23241401	uc008gzz.1	Klf9	9.30519	9.42935	6.83196	6.88982
chr11	95196331	95243186	uc007lag.2	Fam117a	7.8721	8.20696	5.399	5.9067
chr7	34925715	34955548	uc009giu.1	Uba2	11.134	10.9262	8.66204	8.79784
chr14	48160567	48190109	uc007tik.2	Atg14	9.00748	8.89884	6.53651	5.48043
chr12	17353298	17436901	uc007ncu.1	Nol10	10.1291	9.8931	7.66204	7.87275
chr13	48354795	48359405	uc007qid.1	Id4	4.54348	4.92156	2.07708	3.48043
chr19	24168991	24301516	uc008ham.2	Tjp2	4.54348	5.19458	2.07708	0.480432
chr7	145450269	145591413	uc009kez.1	Tcerg1l	4.54348	4.42406	2.07708	0.480432
chr1	183745445	183774532	uc007dxo.2	Lbr	10.8079	10.514	8.34386	8.77964
chr19	46645854	46671390	uc008htu.1	Sfxn2	6.12284	5.82845	3.66204	3.93986
chr1	188544964	188575237	uc007dzq.1	Rrp15	9.06046	8.87576	6.60064	6.83798
chr4	56762551	56817203	uc012del.1	Ikbkap	10.9035	10.6574	8.45212	8.52483
chr1	71632096	71701745	uc007bju.1	Fn1	5.52661	5.69415	3.07708	2.06539
chr2	71555473	71569023	uc008kay.1	Gm1631	4.52661	4.42406	2.07708	0.480432
chr19	43574242	43601095	uc012bmb.1	Got1	10.9684	11.099	8.52002	8.81135
chr2	30744990	30760817	uc008jcz.1	Ptges	7.33153	7.21924	4.88443	4.65036
chr8	98155458	98168959	uc009myr.1	Gins3	7.9814	7.49647	5.53651	6.45771
chr6	5433350	5448278	uc009awk.1	Pdk4	5.5181	4.98045	3.07708	1.48043
chr6	23022172	23084986	uc009bbc.2	Aass	5.5181	5.42406	3.07708	2.06539
chr4	58978461	59001950	uc008szm.1	Ptgr1	8.90185	8.69854	6.46939	6.33841
chr14	63376451	63381949	uc007ugv.1	Ints6	4.50953	4.14395	2.07708	2.48043
chr2	76191999	76200505	uc008key.1	Cyct	4.50953	4.58452	2.07708	0.480432
chr8	77735842	77748012	uc009mhg.2	Rasd2	5.50092	5.86016	3.07708	2.06539
chrX	160705362	160810945	uc009uvl.2	Pir	5.50092	5.09148	3.07708	0.480432
chr7	120459157	120514853	uc009jhl.1	Btbd10	8.892	8.84835	6.46939	6.83798
chr2	154710078	154720642	uc008njx.1	Eif2s2	6.083	6.09148	3.66204	2.80236
chr17	31981194	31994737	uc008bvr.1	Sik1	9.30209	9.40537	6.88443	6.93986
chr15	75690768	75697834	uc007whh.1	Gsdmd	5.49226	5.58452	3.07708	3.28779
chr15	102749561	102759245	uc007xwv.1	Hoxc13	4.49226	4.65852	2.07708	0.480432
chr7	52823732	52842128	uc009gwc.1	Bcat2	4.49226	5.38099	2.07708	2.48043
chr9	71061595	71144050	uc009qox.2	Aldh1a2	4.49226	4.79603	2.07708	0.480432
chrX	149551330	149567404	uc009uqs.2	Foxr2	4.49226	4.3366	2.07708	3.06539
chr13	67506657	67524354	uc007rat.1	Zfp459	7.07722	6.74599	4.66204	4.28779
chr14	51561977	51573087	uc007tme.2	Pnp	11.4065	11.2146	8.99594	9.03885
chr11	17109895	17135203	uc007icd.1	Wdr92	9.06996	8.94022	6.66204	6.56789
chr14	35121912	35158219	uc007tas.2	Glud1	12.4324	12.3199	10.0254	10.2101
chr12	79989683	80009925	uc007nzl.2	Plek2	5.48354	5.14395	3.07708	0.480432
chr4	147128082	147185895	uc012dpf.1	Gm13157	6.06558	5.79603	3.66204	3.28779
chr19	10743446	10754561	uc008gqp.2	Pga5	4.47477	4.86016	2.07708	0.480432
chr7	86196368	86259985	uc009hxw.1	Acan	4.47477	5.03704	2.07708	0.480432
chr7	152080436	152086856	uc009kqr.1	Fgf15	5.47477	5.92156	3.07708	0.480432
chr1	123450411	123466557	uc007cjw.2	Ddx18	11.3167	11.1294	8.92257	8.85981
chr2	112217367	112254394	uc008lpa.1	2410042D21Rik	7.92135	7.86016	5.53651	6.45771
chr12	29358071	29367039	uc007nfv.1	Adi1	8.70687	8.50652	6.325	7.10979
chr14	31290750	31340242	uc007sva.1	Dcp1a	8.62798	8.43463	6.247	6.23532
chr15	99608898	99707887	uc007xqi.2	Lima1	4.45707	4.3366	2.07708	2.80236
chr17	56939331	56972431	uc008ddh.2	Rfx2	4.45707	4.14395	2.07708	3.06539
chr4	135240371	135264095	uc008vgw.2	Il28ra	4.45707	4.79603	2.07708	0.480432
chr5	136436092	136452346	uc008zzj.2	Srcrb4d	4.45707	4.65852	2.07708	0.480432
chr8	108655082	108662874	uc009nff.1	Esrp2	4.45707	4.79603	2.07708	0.480432
chr3	30892692	30951662	uc008ovs.1	Prkci	10.8142	10.7353	8.43463	8.45198
chr7	125628625	125637489	uc009jjx.1	Itpripl2	8.7781	8.84439	6.399	6.63018
chr10	128157191	128183112	uc007hoc.1	Dgka	8.62303	8.57022	6.247	6.03502
chr15	66760879	66803203	uc007wax.1	Ndrg1	6.45261	5.92156	4.07708	4.93986
chr15	100056289	100091679	uc007xqs.1	Atf1	8.0331	8.04395	5.66204	6.15286
chr13	65378161	65399103	uc007qzj.1	Zfp369	7.44813	7.16949	5.07708	5.80236
chr11	45761655	45770996	uc007inv.1	Thg1l	5.44813	4.79603	3.07708	3.93986
chr1	133025017	133036811	uc007cmw.1	Dyrk3	10.1964	10.2791	7.83196	8.19468
chr16	13778791	13814934	uc007ygj.1	Rrn3	12.863	12.695	10.4991	10.6579
chrX	136143158	136207684	uc009uki.2	Rnf128	6.02411	6.31388	3.66204	3.48043
chr12	87760593	87856472	uc007ohu.1	Esrrb	4.43914	4.42406	2.07708	0.480432
chr19	6402653	6409668	uc008gir.1	Rasgrp2	4.43914	4.86016	2.07708	0.480432
chr9	114308212	114374408	uc009rxl.2	Glb1	4.43914	4.72891	2.07708	2.06539
chr5	137751126	137757469	uc009acd.1	Trip6	8.68517	8.82041	6.325	6.43463
chr11	100231932	100261053	uc007lkz.1	Jup	9.60606	9.93651	7.247	7.23532
chr14	47860618	47898532	uc007thu.2	Wdhd1	7.60506	6.89118	5.247	4.93986
chr11	79402713	79507514	uc007kku.1	Rab11fip4	7.43463	7.56541	5.07708	4.56789
chr8	23486021	23511093	uc009lcz.2	Slc25a15	9.28777	9.08479	6.93506	7.56789
chr3	32626418	32637677	uc008owp.2	Mrpl47	7.23616	6.82845	4.88443	5.56789
chr8	114435917	114459691	uc009nna.1	Tmem231	7.74839	7.61272	5.399	5.9067
chr14	45902761	45940247	uc007tgm.2	Ero1l	8.51382	8.11138	6.16454	6.85547
chr2	173049965	173104034	uc008odq.1	Pmepa1	7.74657	8.0577	5.399	5.18087
chr5	5537456	5561501	uc008wis.1	Gtpbp10	8.12424	7.89118	5.77752	5.93986
chr1	182497105	182531385	uc007dwi.1	Parp1	13.0229	13.0156	10.677	10.7566
chr14	64560542	64569569	uc007uhy.1	Sox7	4.421	4.65852	2.07708	2.06539
chr4	132848380	132911396	uc008vcr.2	Wdtc1	4.421	4.24349	2.07708	0.480432
chr8	28151026	28166604	uc009lhw.1	Prosc	4.421	4.42406	2.07708	3.48043
chr9	40588824	40594264	uc009ozv.1	AK089373	5.421	5.29079	3.07708	2.06539
chr2	166838812	166860445	uc008nzb.1	Ddx27	10.3469	10.3253	8.00781	8.46912
chr12	33503199	33538234	uc007nif.2	Nampt	8.8721	8.86016	6.53651	6.70925
chr1	186695804	186708915	uc007dys.1	C130074G19Rik	5.41184	4.98045	3.07708	0.480432
chr17	23978074	23983123	uc008atw.1	Prss41	5.41184	5.79603	3.07708	0.480432
chr4	11103110	11120421	uc008rzc.1	AK080292	6.40723	6.50652	4.07708	4.38732
chr15	57853813	57867849	uc007vta.1	9130401M01Rik	9.15887	8.87576	6.83196	7.28779
chr11	116140252	116145252	uc007mkr.2	Galr2	4.40262	4.58452	2.07708	2.48043
chr12	4839979	4850401	uc007myj.1	Fkbp1b	4.40262	4.86016	2.07708	2.80236
chr16	18875129	18928104	uc007yor.1	Hira	4.40262	5.09148	2.07708	2.80236
chr4	118197879	118202822	uc008ukj.1	2610528J11Rik	4.40262	4.98045	2.07708	0.480432
chr8	4491404	4526079	uc009ktx.2	Lass4	7.56843	7.58452	5.247	4.80236
chrX	101732308	101868403	uc009uaj.2	Zdhhc15	6.9814	6.82845	4.66204	3.65036
chr3	145648833	145684684	uc008rqv.2	Syde2	7.9783	7.82845	5.66204	6.06539
chr8	83504631	83540805	uc009mjd.1	Usp38	9.74748	9.575	7.43463	7.95617
chr16	57156777	57169445	uc007zna.1	Nit2	10.0014	9.68532	7.69179	7.78421
chr17	34999546	35021045	uc008cdz.2	C2	4.384	4.72891	2.07708	3.06539
chr18	46717884	46736187	uc008evp.2	Ticam2	4.384	4.42406	2.07708	1.48043
chr5	116571622	116579119	uc008zex.1	AK049264	4.384	4.92156	2.07708	1.48043
chr1	120730637	120952196	uc007cim.1	Gli2	6.96896	7.41341	4.66204	5.18087
chr1	10014911	10029979	uc007ahe.1	Cops5	8.18734	7.42406	5.88443	6.38732
chr2	79292797	79298793	uc008kgt.1	Neurod1	5.3746	6.16949	3.07708	2.48043
chr9	40100818	40340968	uc009ozn.1	Gramd1b	5.3746	5.24349	3.07708	2.48043
chr12	70791422	70827861	uc011ynb.1	L2hgdh	8.07141	7.84439	5.77752	6.38732
chr11	115936724	115941275	uc007mju.1	Unc13d	7.53928	7.10478	5.247	5.18087
chrX	160508634	160515981	uc009uvd.1	Siah1b	9.17656	9.13426	6.88443	6.72836
chr2	25048239	25054333	uc008iql.2	A830007P12Rik	7.53507	7.73748	5.247	5.18087
chr18	32089160	32118273	uc008eiv.1	Lims2	4.36514	4.65852	2.07708	3.48043
chr4	146547955	146887529	uc008vsu.1	Gm13152	4.36514	4.24349	2.07708	0.480432
chr8	124952798	124958807	uc009nsr.1	AK154184	4.36514	5.03704	2.07708	1.48043
chr3	93244251	93252999	uc012cti.1	Tchh	4.36514	5.14395	2.07708	0.480432
chr11	72203615	72227215	uc007jyv.1	Smtnl2	8.06412	8.41341	5.77752	5.33841
chr4	59816521	59917612	uc008tae.1	Snx30	8.88623	8.68532	6.60064	5.97228
chr2	118102833	118201155	uc008lru.2	Gpr176	6.36039	6.14395	4.07708	5.06539
chr5	67783385	67821038	uc012dws.1	Bend4	8.75203	8.62661	6.46939	5.76583
chr1	182779281	182798245	uc007dwt.1	BC031781	10.19	10.2922	7.90997	7.79331
chr1	136454754	136529455	uc011wsg.1	Kdm5b	8.93899	8.7203	6.66204	6.12429
chr18	31961710	31995089	uc008eio.2	Wdr33	5.93739	5.622	3.66204	4.28779
chr2	151929465	151937089	uc008new.1	Srxn1	9.52129	9.42406	7.247	7.49166
chr6	34253929	34269489	uc009bgy.2	Akr1b3	12.6991	12.6168	10.4258	10.479
chr11	72859368	72870239	uc007jzu.2	1200014J11Rik	4.34603	4.3366	2.07708	2.80236
chr18	12913844	13023182	uc008ecp.1	Osbpl1a	4.34603	4.65852	2.07708	2.80236
chr4	129058004	129072505	uc008uwx.1	AK049295	4.34603	4.72891	2.07708	0.480432
chr6	125228291	125238060	uc009dui.1	Tuba3a	5.34603	5.72891	3.07708	0.480432
chr8	26875010	26897681	uc009lgy.1	Bag4	10.0461	10.0196	7.77752	7.9067
chr1	71601729	71625977	uc007bjt.2	Atic	11.5547	11.4889	9.28653	9.32278
chr10	77530112	77542270	uc007fxi.1	Icosl	6.66411	6.67645	4.399	3.80236
chr1	130228169	130258233	uc007clo.1	Mcm6	5.33638	5.19458	3.07708	3.28779
chr15	102065370	102078783	uc007xvc.1	Rarg	5.33638	5.50652	3.07708	2.80236
chr1	177808908	177841527	uc007dtu.2	Exo1	10.7275	10.4774	8.46939	8.23532
chr3	95460642	95467101	uc008qkl.1	Mcl1	12.8666	12.8943	10.6085	10.611
chr11	78020250	78061205	uc007kip.2	Supt6h	9.72593	9.70073	7.46939	7.53571
chr4	116391559	116476853	uc008uhj.2	Tesk2	6.91488	6.65852	4.66204	4.80236
chr1	108667364	108695302	uc007cgz.2	Vps4b	9.23486	8.97684	6.98397	6.95617
chr11	96648449	96665283	uc007lck.1	Cbx1	5.32667	5.03704	3.07708	4.06539
chr2	25084416	25091727	uc008iqt.2	Slc34a3	4.32667	4.24349	2.07708	0.480432
chrX	7581326	7597618	uc009snn.1	Glod5	4.32667	4.65852	2.07708	0.480432
chr1	93389244	93425884	uc007cax.2	Traf3ip1	6.31197	6.29079	4.07708	3.80236
chr11	70791347	70798528	uc007jxf.1	C1qbp	11.3669	11.3345	9.13236	9.41707
chr1	135500447	135508857	uc007cql.2	Snrpe	11.2962	10.8796	9.06576	9.32905
chr17	31343010	31379348	uc008bus.2	Ubash3a	4.30704	4.50652	2.07708	0.480432
chr5	115398988	115423071	uc008zcz.2	Hnf1a	4.30704	5.24349	2.07708	0.480432
chr9	105758399	105864974	uc009riv.2	Gm7455	4.30704	4.98045	2.07708	1.48043
chrX	71099118	71128173	uc009tmv.1	L1cam	4.30704	4.24349	2.07708	1.48043
chr9	99474217	99484762	uc009rei.1	Dbr1	9.47147	9.47615	7.247	7.48043
chr4	129193347	129221890	uc008uxg.1	Hdac1	10.9444	10.7417	8.72093	8.74722
chr7	146082518	146103189	uc009kfg.1	Bnip3	8.38751	8.24349	6.16454	6.45771
chr7	133526367	133542251	uc009jra.1	Nfatc2ip	7.99986	8.33095	5.77752	6.43463
chr7	70243577	70359412	uc009vel.1	Chrna7	5.29712	5.54605	3.07708	3.48043
chr7	29678272	29749299	uc009gah.1	Actn4	11.3691	11.6057	9.15389	9.36613
chr2	5056821	5151912	uc008ifo.1	Ccdc3	6.29214	6.40269	4.07708	3.80236
chr6	30316387	30343010	uc009bfd.1	Zc3hc1	7.74657	7.43463	5.53651	6.41117
chr5	139747829	139803418	uc009agi.1	Adap1	4.28714	4.03704	2.07708	1.48043
chr17	85355340	85416468	uc008dth.2	Ppm1b	7.60706	7.60338	5.399	5.28779
chr11	96648449	96669954	uc007lcl.1	Cbx1	7.27961	7.06452	5.07708	5.23532
chr19	6083096	6091773	uc008ghh.1	Cdca5	6.27709	6.48634	4.07708	4.72836
chr5	38609720	38625545	uc008xgh.2	Lyar	6.597	6.00902	4.399	3.48043
chr1	71691050	71701745	uc007bkd.1	Fn1	5.26696	4.65852	3.07708	3.48043
chr11	68756655	68772360	uc007jol.1	Arhgef15	4.26696	4.3366	2.07708	0.480432
chr16	38396202	38435225	uc007zew.1	Pla1a	4.26696	4.14395	2.07708	2.80236
chr3	130813714	130891000	uc008rjj.1	Lef1	4.26696	4.03704	2.07708	0.480432
chr1	5071253	5152630	uc007afn.1	Atp6v1h	9.47312	9.07469	7.28653	7.31332
chr4	141586907	141642219	uc008vpr.1	Tmem51	7.58482	7.95131	5.399	5.28779
chr1	59248466	59296075	uc007bdn.2	Als2	5.25677	4.14395	3.07708	3.06539
chr14	121308415	121347266	uc007uzz.1	Ipo5	12.2685	12.1448	10.0939	10.1369
chr19	47927478	47939278	uc008hvq.1	Gsto1	10.8932	10.9669	8.72093	8.98426
chr10	7385301	7398684	uc007eid.2	Nup43	7.41871	7.27911	5.247	5.06539
chr11	60602398	60626767	uc007jgo.1	Shmt1	10.0816	9.81435	7.90997	8.31964
chr13	53562249	53570149	uc007qnw.1	Msx2	4.2465	4.72891	2.07708	0.480432
chr7	51478806	51484987	uc009goo.1	Klk1	4.2465	4.3366	2.07708	0.480432
chr2	119435267	119446241	uc008ltz.1	Oip5	7.83146	7.58452	5.66204	6.70925
chr1	71074108	71151546	uc007bjm.2	Bard1	9.10377	8.9178	6.93506	6.95617
chr1	88421310	88427273	uc007bvp.1	Ptma	14.9056	15.2581	12.738	12.5418
chr4	107550417	107560003	uc008uaj.1	Magoh	10.4133	10.3851	8.247	8.35695
chr16	87483569	87498114	uc007zul.1	Cct8	11.5542	11.3966	9.38996	9.82473
chr3	138121923	138154346	uc008rnl.1	Metap1	9.96818	9.95131	7.805	7.82028
chr9	62639635	62661455	uc009qam.2	Fem1b	12.2239	11.9755	10.0658	10.1964
chr17	85104586	85192126	uc008dtc.1	Lrpprc	9.78787	9.49141	7.63167	7.78421
chr10	88209351	88291559	uc007grx.2	Utp20	10.2774	9.83843	8.12147	8.34462
chr7	97617338	97626505	uc009ihp.1	Tmem126b	5.81766	5.42406	3.66204	3.28779
chr11	96799129	96807333	uc007ldc.1	Pnpo	8.39915	8.51152	6.247	5.56789
chr9	83439944	83493898	uc009qwl.1	Sh3bgrl2	7.92939	7.90645	5.77752	5.72836
chr1	16987544	17089879	uc007aka.1	Jph1	5.22574	5.14395	3.07708	2.48043
chr16	5086383	5134574	uc007ybt.1	Ppl	4.22574	4.24349	2.07708	0.480432
chr5	37440095	37516537	uc008xfj.2	Jakmip1	4.22574	4.3366	2.07708	0.480432
chr5	45882612	45903930	uc008xiy.2	Lap3	11.7252	11.6837	9.57692	9.68256
chr3	105760415	105772678	uc008qvp.1	Wdr77	10.9106	10.6963	8.76358	8.91922
chr14	32306264	32323044	uc007sxt.2	Eaf1	10.6449	10.5065	8.50334	8.70925
chr16	58668320	58677328	uc007znz.2	Cpox	9.57357	9.03356	7.43463	6.83798
chr11	61684808	61745728	uc007jii.1	Akap10	7.21525	6.82845	5.07708	5.06539
chr1	74816465	74831893	uc007bne.1	Wnt6	5.21525	5.42406	3.07708	2.06539
chr4	53836916	53874890	uc008sxh.2	Tmem38b	7.384	7.10478	5.247	4.80236
chr17	28342722	28365553	uc008bqi.2	Def6	7.0211	7.35896	4.88443	4.80236
chr1	183023553	183076288	uc007dxb.1	Nvl	9.38107	9.19458	7.247	7.09514
chr3	95057595	95087998	uc008qiz.1	Prune	10.2768	10.285	8.14317	8.31964
chr7	87856468	87950217	uc009ibc.2	Iqgap1	10.6864	10.6174	8.55281	8.3508
chr15	11313417	11331413	uc007vhc.1	Tars	10.8105	10.7681	8.67699	8.71884
chr6	149257937	149262911	uc009eue.1	AK134400	6.20997	6.26733	4.07708	3.28779
chr3	101616998	101642146	uc008qrk.2	BC037703	6.79317	6.65852	4.66204	4.56789
chr11	72113130	72127235	uc011xyi.1	Xaf1	6.79317	6.71164	4.66204	4.72836
chr6	31469492	31515937	uc009bgh.2	Podxl	8.37578	8.68532	6.247	6.52483
chr6	54935088	54944861	uc009cah.1	Ggct	7.52661	7.35896	5.399	4.65036
chr3	68839215	68850664	uc008pmd.2	Trim59	8.29214	8.00193	6.16454	6.26179
chr16	48429349	48631018	uc007zjp.1	Morc1	5.20468	5.622	3.07708	0.480432
chr17	37123799	37128449	uc008clt.1	H2-M5	4.20468	4.3366	2.07708	0.480432
chr4	133807024	133812021	uc008veo.1	Grrp1	4.20468	4.03704	2.07708	1.48043
chr11	102546001	102561039	uc007lsg.1	Ccdc43	9.28902	9.09815	7.16454	7.45771
chr4	116356203	116372605	uc008uhd.1	Prdx1	14.2789	13.9965	12.1552	12.2278
chr10	84083181	84189923	uc007gku.1	Polr3b	9.15408	9.13426	7.03127	7.24862
chr19	39003479	39042767	uc008hjt.1	Hells	8.89858	8.31388	6.77752	6.56789
chr18	24263261	24282320	uc008ego.1	Ino80c	5.78255	5.3366	3.66204	3.80236
chr5	29893781	30002617	uc008wun.1	Ube3c	10.1924	9.91968	8.07708	8.48043
chr9	48861736	48886878	uc009piu.1	Zw10	5.77543	5.72891	3.66204	4.38732
chr4	118978894	118995128	uc008uly.2	Ppih	6.77185	6.31388	4.66204	4.38732
chr2	29915292	29920036	uc008jav.1	AK031561	6.1833	6.65852	4.07708	4.06539
chr13	3475548	3487304	uc007pip.2	2810429I04Rik	4.1833	4.14395	2.07708	2.06539
chr7	31418634	31422871	uc009gfm.1	Etv2	4.1833	4.24349	2.07708	0.480432
chr14	55632290	55642974	uc007txx.2	Ngdn	10.133	10.1261	8.03127	8.60455
chr11	94506315	94517068	uc007kzf.1	Eme1	9.50038	9.59162	7.399	7.6996
chr4	147156427	147185895	uc008vtb.2	Gm13157	5.76107	5.50652	3.66204	1.48043
chr8	127363254	127388929	uc009nxs.2	2810004N23Rik	9.38166	9.11138	7.28653	7.80236
chr6	131314875	131340468	uc009eis.1	Csda	6.49226	6.58452	4.399	4.56789
chr8	108726130	108736833	uc009nfr.2	Slc7a6os	5.75384	5.46588	3.66204	3.80236
chr19	42197764	42205483	uc008hnh.1	Avpi1	8.9752	9.25844	6.88443	7.37525
chr11	88833177	88852927	uc007kwa.1	Coil	7.97364	7.79603	5.88443	5.56789
chr8	124320207	124355469	uc009nsb.2	Klhdc4	10.7034	10.7857	8.61623	8.86845
chr7	20309511	20336922	uc009fne.2	Pvrl2	7.96896	8.24349	5.88443	6.56789
chr17	37077995	37084931	uc008clm.1	Rnf39	4.16161	4.86016	2.07708	2.06539
chr5	113917466	114039679	uc008yyi.2	Wscd2	5.16161	4.72891	3.07708	0.480432
chr8	87433234	87438411	uc009mob.1	Dnase2a	4.16161	4.14395	2.07708	1.48043
chr8	112476808	112488105	uc009njq.2	Marveld3	4.16161	4.24349	2.07708	0.480432
chr19	59015914	59045911	uc012bob.1	Eno4	4.16161	4.42406	2.07708	2.48043
chr16	30597808	30602883	uc007ywy.2	Fam43a	8.40839	8.83245	6.325	6.20835
chr1	59696277	59729678	uc007bdx.1	Sumo1	10.7896	10.5606	8.70643	8.94804
chr4	62067816	62088024	uc008ter.1	Prpf4	10.6828	10.535	8.60064	8.9025
chr16	33014355	33058272	uc007yzt.2	Iqcg	6.47916	6.42406	4.399	3.65036
chr2	84273016	84316331	uc008kij.1	Tfpi	5.15064	5.50652	3.07708	1.48043
chrX	104592533	104600699	uc009ucg.1	Itm2a	6.95327	7.15677	4.88443	5.83798
chr7	126858607	126866279	uc009jlo.1	Thumpd1	9.57152	9.35619	7.50334	7.66034
chr15	38589658	38622199	uc007vnv.2	Atp6v1c1	9.78566	9.59162	7.72093	8.00399
chr1	162133051	162144908	uc007deg.1	Cacybp	9.59952	9.31959	7.53651	7.88131
chr14	64053230	64084339	uc007uhr.2	Fam167a	5.13958	5.14395	3.07708	4.28779
chr2	109742552	109755476	uc012cav.1	Gm13939	4.13958	4.14395	2.07708	0.480432
chr18	12285358	12315876	uc008eby.1	Riok3	9.69323	9.46072	7.63167	7.43463
chr2	103561415	103603407	uc008liy.1	Nat10	10.2254	10.0998	8.16454	8.44622
chr6	29073572	29116724	uc009bcy.2	Rbm28	8.21919	7.88349	6.16454	6.54652
chr11	53136190	53146803	uc007ivt.1	Zcchc10	6.71341	6.92156	4.66204	2.80236
chr16	87494243	87504073	uc007zum.1	AK139053	5.12844	4.58452	3.07708	2.80236
chr19	5707373	5728317	uc008gew.2	Ehbp1l1	5.12844	4.86016	3.07708	1.48043
chr12	88648838	88731180	uc007oiw.1	Sptlc2	8.12844	7.98765	6.07708	6.18087
chr16	35981448	36036248	uc007zcb.1	Kpna1	9.82716	9.37825	7.77752	7.81135
chr10	40907977	41025047	uc007exk.1	Fig4	9.17046	9.21924	7.12147	7.26179
chr11	97545265	97549939	uc007lek.2	Cisd3	6.70967	6.00902	4.66204	3.93986
chr3	104440590	104462385	uc008qui.1	Slc16a1	11.1907	11.0543	9.14317	8.86414
chr2	118421946	118467328	uc008lse.2	Bub1b	11.6479	11.5202	9.60064	9.71884
chr1	84717763	84837879	uc007bsy.1	Trip12	10.8656	10.3905	8.81854	8.55725
chr13	63114293	63400964	uc007qxi.1	2010111I01Rik	5.11722	4.79603	3.07708	3.06539
chr15	25912120	25920219	uc007vjj.1	Zfp622	4.11722	4.42406	2.07708	2.06539
chr1	72281038	72312710	uc011wmt.1	AK044410	4.11722	4.14395	2.07708	2.80236
chr2	33261627	33288844	uc008jhu.1	Zbtb34	7.43689	7.65852	5.399	5.87275
chr11	49605656	49652122	uc011xud.1	Gfpt2	9.99373	9.98405	7.95972	7.92338
chr1	180885169	181450134	uc007dvj.1	Smyd3	7.27961	7.48634	5.247	5.43463
chr7	75881879	75896124	uc009hjh.1	Arrdc4	7.69464	7.34782	5.66204	5.18087
chr10	127494037	127514310	uc007hld.1	Ptges3	12.5238	12.3544	10.4949	10.2651
chr5	92713035	92741050	uc008yct.1	Sdad1	7.91326	7.77122	5.88443	6.03502
chr12	74222703	74374975	uc007nwe.1	Mnat1	6.1059	6.06452	4.07708	4.93986
chr12	103994184	104015911	uc007oup.1	Ubr7	10.7452	10.4876	8.72093	8.9025
chr1	38234171	38723800	uc007ass.2	Aff3	6.10021	6.24349	4.07708	2.06539
chr11	75298278	75322949	uc007kdx.1	Prpf8	12.6696	12.7114	10.6469	10.8631
chr11	17103202	17113592	uc007icc.1	Pno1	9.30395	8.99123	7.28653	6.76583
chr12	87085488	87154535	uc007ohe.1	Mfsd7c	5.0945	4.72891	3.07708	2.06539
chr4	133869034	133885544	uc008vet.1	Trim63	4.0945	4.3366	2.07708	0.480432
chr11	120515102	120524151	uc007mtz.2	Notum	5.67946	5.86016	3.66204	1.48043
chr5	121845990	121890122	uc008zjc.1	Naa25	6.6718	6.26733	4.66204	4.18087
chr1	155066051	155181916	uc007czu.1	Lamc1	12.3663	12.4415	10.3578	10.4958
chr14	76508697	76537186	uc007ure.1	Nufip1	8.99143	8.73748	6.98397	6.97228
chr4	116690012	116745865	uc008uhu.2	Eif2b3	5.083	4.58452	3.07708	2.06539
chr8	13077524	13107343	uc009kwv.1	Pcid2	5.083	4.86016	3.07708	2.80236
chr4	120212472	120244881	uc008unj.2	Ctps	10.8107	10.6381	8.805	9.06163
chrX	136989141	137010679	uc009uky.2	Prps1	10.0357	9.8184	8.03127	8.45198
chr8	119465292	119484345	uc009nop.2	Atmin	10.229	10.3067	8.22682	8.00399
chr8	27109193	27128073	uc009lhi.1	Fnta	10.7354	10.5015	8.73529	8.94396
chr10	75929715	75978602	uc007fup.1	Mcm3ap	10.9837	10.9291	8.98397	9.55992
chr14	55160621	55175198	uc007twh.2	Haus4	9.82931	9.8582	7.83196	7.87275
chr1	45850345	45880458	uc007awt.1	Wdr75	8.71713	8.5015	6.72093	6.43463
chr16	96201541	96214510	uc008ach.1	Psmg1	9.97985	9.82644	7.98397	8.51935
chr5	72592567	72690010	uc008xrh.2	Atp10d	6.39334	6.16949	4.399	4.87275
chr17	46569133	46577426	uc008csw.2	Slc22a7	4.07141	4.24349	2.07708	1.48043
chr5	33977600	33996955	uc008xav.1	Slbp	5.07141	5.09148	3.07708	4.06539
chr6	148869580	148896954	uc009etr.1	Fam60a	5.07141	4.14395	3.07708	1.48043
chr7	52659329	52666752	uc009guz.1	Kcna7	4.07141	4.14395	2.07708	0.480432
chr8	26927341	26960142	uc009lhd.1	Ash2l	4.07141	4.24349	2.07708	0.480432
chr18	35062438	35093657	uc008elu.1	Etf1	11.5543	11.3246	9.56089	9.62254
chr4	109347231	109636565	uc008uct.1	Faf1	10.9517	10.7171	8.95972	8.98426
chr15	88690623	88696156	uc007xeq.1	Pim3	10.8368	11.0577	8.84526	8.85981
chr2	127032139	127066187	uc008mez.1	Snrnp200	12.1289	12.0789	10.1378	10.2101
chr15	58245022	58289356	uc007vtn.2	D15Ertd621e	9.90062	9.55334	7.90997	8.26833
chr15	96517822	96532129	uc007xkm.1	Slc38a2	11.7236	11.7024	9.73529	9.77964
chr10	85332575	85351848	uc007gnd.2	Pwp1	9.64908	9.43726	7.66204	7.57846
chr18	35097068	35116005	uc008elv.2	Hspa9	12.5526	12.2893	10.5689	10.6984
chr6	83756052	83783735	uc009cok.2	Paip2b	9.64469	9.49141	7.66204	7.30061
chr6	137701097	137786393	uc009enh.1	Dera	8.75746	8.53627	6.77752	6.82028
chr17	45568779	45578512	uc008cql.1	B230354K17Rik	5.64078	5.46588	3.66204	3.80236
chr12	60112379	60128975	uc007npx.2	Sip1	8.05532	7.83644	6.07708	5.52483
chr3	138104127	138118463	uc008rnk.1	Adh5	11.9858	11.8424	10.0078	10.0579
chrX	12162884	12194177	uc009sqx.2	Atp6ap2	8.95721	8.86407	6.98397	7.15286
chr12	25391118	25399011	uc007ner.2	Rrm2	11.8893	11.7089	9.91628	10.1687
chr9	106348970	106355249	uc009rjs.2	Abhd14b	5.63292	5.69415	3.66204	2.06539
chr11	9016509	9036173	uc007hzy.2	Upp1	4.04795	4.14395	2.07708	0.480432
chr12	71291801	71330670	uc007ntm.2	Pygl	4.04795	4.03704	2.07708	2.80236
chr3	151756804	151830864	uc008rsp.1	Gipc2	4.04795	4.50652	2.07708	0.480432
chr6	48624133	48628703	uc009bvh.1	Gimap9	4.04795	4.65852	2.07708	1.48043
chrX	160345091	160367478	uc009uuw.1	Ap1s2	5.04795	4.58452	3.07708	1.48043
chr13	98009059	98022995	uc007rod.2	Enc1	11.4553	11.4267	9.48647	9.71405
chr1	187911610	187943189	uc007dzm.2	Lyplal1	7.50523	7.26733	5.53651	5.80236
chr9	72959275	72971140	uc009qra.1	Rsl24d1	11.1852	10.869	9.21663	9.48325
chr4	132089473	132109657	uc012dmi.1	Dnajc8	10.6116	10.5314	8.64693	8.53028
chr1	136300566	136308315	uc007crv.1	Cyb5r1	5.62501	6.14395	3.66204	2.06539
chr5	130729488	130761256	uc012eeb.1	Tyw1	5.03608	5.42406	3.07708	3.65036
chr11	93720556	93749080	uc007kxk.1	Utp18	7.7356	7.42406	5.77752	5.18087
chr18	61356507	61373250	uc008fbu.1	Slc26a2	7.20468	7.19458	5.247	5.18087
chr8	71610634	71637616	uc009lwx.2	Atp6v1b2	10.8246	10.4555	8.87149	8.99218
chr7	140178693	140317166	uc009kcy.1	Ctbp2	6.03011	5.29079	4.07708	3.06539
chr1	108616986	108658319	uc007cgy.2	Kdsr	8.42214	8.35896	6.46939	6.82028
chr19	30172936	30251908	uc008hej.1	Gldc	9.64274	9.47102	7.69179	8.26179
chr10	80965058	80988970	uc007gij.1	Gna15	4.02411	4.50652	2.07708	0.480432
chr12	8952734	8978834	uc007nag.2	Matn3	4.02411	4.03704	2.07708	0.480432
chr7	52462894	52469253	uc009guc.2	Dkkl1	4.02411	4.65852	2.07708	0.480432
chr7	111365308	111376247	uc009ivp.1	Trim6	5.02411	5.29079	3.07708	0.480432
chr8	129487735	129496979	uc009nzd.1	Rbm34	4.02411	4.50652	2.07708	2.06539
chrX	100624855	100680296	uc012hnd.1	Tsix	5.02411	5.03704	3.07708	1.48043
chr11	4793345	4828868	uc007hvl.1	Thoc5	10.4646	10.4214	8.52002	8.6996
chr1	20793094	20812294	uc007alc.1	Mcm3	12.8795	12.8878	10.9351	11.1555
chr10	77886414	77890367	uc007fxt.1	Cstb	8.87461	8.87187	6.93506	7.05029
chr17	87396598	87426741	uc008dun.1	Pigf	8.33638	8.21924	6.399	6.80236
chr8	74058160	74063336	uc009mdr.1	Bst2	7.33638	7.56541	5.399	5.43463
chr18	38004478	38097065	uc008erj.1	Diap1	9.74201	9.54361	7.805	7.48043
chr1	134193202	134203934	uc007con.1	Klhdc8a	5.01203	5.54605	3.07708	2.48043
chr9	70255495	70271361	uc009qny.1	Ccnb2	10.4181	10.3905	8.48647	8.685
chr19	47140237	47157969	uc008hun.1	Taf5	8.17791	7.89118	6.247	6.52483
chr2	112331120	112471410	uc008lpe.2	Aven	5.99986	6.09148	4.07708	4.65036
chr13	49559427	49750100	uc007qjk.1	Cenpp	4.99986	5.24349	3.07708	3.28779
chr15	79719961	79725568	uc007wuq.2	D730005E14Rik	4.99986	5.42406	3.07708	3.06539
chr8	28368798	28386128	uc009lih.1	Eif4ebp1	11.6317	11.9388	9.7137	9.77505
chr6	86313676	86320052	uc009crl.1	Fam136a	10.1034	9.85032	8.1856	8.31964
chr15	25912120	25928237	uc007vjk.1	Zfp622	8.63783	8.52147	6.72093	6.9067
chr1	136857153	136870714	uc007csp.1	Ube2t	8.45037	8.0231	6.53651	6.78421
chr3	100742782	100775586	uc008qrb.2	Ttf2	8.31197	8.22534	6.399	5.76583
chr10	62042994	62067046	uc007fhn.1	Ddx21	11.3436	11.131	9.43463	9.42588
chr16	15623989	15639493	uc007yhr.2	Mcm4	11.1747	10.8295	9.2669	9.27485
chr3	100844158	100916089	uc008qre.1	Ptgfrn	9.626	9.8523	7.72093	7.56789
chr6	39036410	39070348	uc009blg.2	Parp12	7.78787	7.63122	5.88443	5.80236
chr2	68697613	68949347	uc008jxs.1	Lass6	7.5643	7.3366	5.66204	5.33841
chr8	87512493	87523605	uc009moq.2	Hook2	7.78433	7.50652	5.88443	5.93986
chr1	184205900	184214890	uc007dxw.1	Degs1	9.46705	9.18209	7.56893	7.44622
chr6	122257027	122267695	uc009dow.1	M6pr	11.3315	11.1876	9.43463	9.48886
chr14	25267915	25308268	uc007sqy.1	Polr3a	10.2014	10.0932	8.30589	8.46343
chr5	3594065	3637101	uc008whf.1	Pex1	6.29214	5.92156	4.399	4.38732
chr1	192884899	192908437	uc011wyq.1	Nsl1	8.61307	8.37002	6.72093	6.93986
chr1	129763349	129840453	uc007clc.2	Rab3gap1	9.05606	8.75866	7.16454	7.20835
chr18	42362002	42423725	uc008etp.1	Lars	10.1172	9.86603	8.22682	8.44622
chr2	152560009	152563146	uc008ngf.1	Id1	9.45762	9.51402	7.56893	7.57846
chr5	124148310	124173053	uc008zoh.2	Zcchc8	8.91973	9.03356	7.03127	7.44622
chr6	51417398	51421893	uc009bxq.1	hnRNP A2/B1	4.96271	4.50652	3.07708	2.80236
chr7	26402511	26410569	uc009ftf.1	Atp5sl	4.96271	4.79603	3.07708	3.48043
chr13	99016799	99034947	uc007rom.1	Utp15	10.1907	10.0814	8.30589	8.21514
chr10	21013784	21031004	uc007eol.2	Hbs1l	6.28212	5.86016	4.399	4.18087
chr1	13615979	13652590	uc007aiu.1	Lactb2	8.71061	8.70292	6.83196	6.36307
chr6	118333398	118371435	uc009dlo.1	Bms1	8.20335	7.71164	6.325	5.56789
chr2	128924731	128952331	uc008mhf.2	Polr1b	11.3884	11.2352	9.5117	9.84894
chr16	8828192	8859017	uc007yda.2	1810013L24Rik	8.94456	8.80827	7.07708	7.05029
chr8	24337081	24350140	uc009ler.2	Gins4	9.94416	9.93279	8.07708	8.20835
chr7	125985731	126001512	uc012fsr.1	2310008H09Rik	7.85023	7.622	5.98397	5.97228
chr1	169156216	169217258	uc007dku.1	Uck2	11.3523	11.4729	9.48647	9.74253
chr11	19962306	20014954	uc011xrw.1	Actr2	9.14788	8.8523	7.28653	7.45771
chr9	78241583	78271396	uc012gxe.1	Ddx43	4.93739	4.86016	3.07708	2.48043
chr12	53196732	53411946	uc007nnh.2	Nubpl	6.25677	5.54605	4.399	4.48043
chrX	98447866	98456212	uc009twz.2	Foxo4	9.21919	9.25546	7.36248	7.37525
chr17	71315225	71321145	uc008dlu.1	AK146694	5.5181	4.86016	3.66204	3.80236
chr18	44538153	44584623	uc008eux.2	Dcp2	9.68707	9.48634	7.83196	7.94804
chr5	30060437	30113018	uc008wur.2	Dnajb6	8.88292	8.98765	7.03127	6.72836
chrX	98293124	98419902	uc009twv.2	Snx12	4.92457	4.72891	3.07708	3.28779
chrX	71163407	71169283	uc009tni.2	Naa10	5.50953	5.38099	3.66204	4.06539
chr8	69382115	69414463	uc009lvu.2	Naf1	8.78077	8.9178	6.93506	6.76583
chr11	103683096	103817370	uc007lvt.1	Nsf	9.56482	9.45554	7.72093	7.78421
chr8	26894062	26914447	uc009lha.1	Lsm1	8.44252	8.25546	6.60064	7.06539
chr16	44722411	44737243	uc007zho.1	BC027231	7.91812	7.82041	6.07708	5.12429
chrX	93130651	93154298	uc009tud.1	Las1l	8.4414	8.31388	6.60064	6.5028
chr4	11484118	11542954	uc008rzs.1	Rad54b	6.91488	6.56541	5.07708	5.33841
chr11	115384422	115399544	uc007mhw.1	Sumo2	12.5693	12.6203	10.7317	10.8203
chr18	38487190	38500647	uc008esi.2	Gnpda1	10.5573	10.4672	8.72093	8.97629
chr11	68785988	68789322	uc007jor.1	Rangrf	9.55393	9.40806	7.72093	7.98823
chr4	124390104	124409666	uc008uqx.1	Sf3a3	9.3687	9.28496	7.53651	7.68989
chr1	34493514	34498517	uc011wja.1	Ccdc115	8.76557	8.77539	6.93506	7.01959
chr8	113334391	113372703	uc009nlb.1	Sf3b3	11.8143	11.8587	9.98397	10.144
chr1	34494673	34502592	uc007aor.2	Imp4	10.9366	11.0448	9.1105	9.23866
chr11	90497497	90507291	uc007kwz.1	Cox11	7.36039	7.49647	5.53651	5.68989
chr15	10404533	10417692	uc007vgg.1	Brix1	8.6554	8.46072	6.83196	6.31332
chr1	36849033	36998372	uc007ard.1	Tmem131	9.57152	9.4425	7.7495	7.88982
chr7	134415394	134419573	uc009jux.1	Sephs2	11.0588	10.9841	9.23695	9.34771
chr11	51456590	51466575	uc007iue.1	N4bp3	9.94297	10.1472	8.12147	8.10248
chr17	26850594	26913571	uc008bel.2	A930001N09Rik	4.89858	4.3366	3.07708	2.80236
chr18	75525018	75555588	uc008fqd.1	Smad7	5.48354	5.95131	3.66204	1.48043
chr7	140899015	140912828	uc009kdi.1	Bccip	9.48354	9.30238	7.66204	7.74722
chr3	129527829	129536314	uc008rim.2	Gar1	8.06558	8.11138	6.247	6.60971
chr15	12286808	12524665	uc007vhq.1	Pdzd2	7.21525	7.52642	5.399	5.56789
chr6	88413416	88447560	uc009cvh.1	Ruvbl1	11.2502	11.3576	9.43463	9.60197
chr2	143739066	143769060	uc008mqi.2	Dstn	11.7058	11.6881	9.89086	9.9067
chr5	117829153	117841032	uc008zfs.1	Rfc5	11.2652	11.156	9.45212	9.53842
chr14	65269367	65425133	uc007uim.1	Kif13b	8.21129	8.27323	6.399	6.70925
chr1	4795973	4836816	uc007afh.1	Lypla1	8.52979	9.19768	6.72093	6.43463
chr2	84563278	84569425	uc008kja.1	Clp1	7.20733	7.38099	5.399	4.56789
chr10	90619843	90636327	uc007gtu.1	Tmpo	5.46594	5.19458	3.66204	4.06539
chr11	83892421	83945070	uc007kqf.1	Tada2a	8.52342	8.47615	6.72093	6.83798
chr4	132322274	132334661	uc008vbu.1	Rpa2	10.3218	10.0998	8.52002	9.00399
chr2	26746291	26760333	uc008iwc.1	Surf6	9.45929	9.46072	7.66204	7.66034
chr16	57119826	57154643	uc007zmz.1	Tomm70a	11.156	10.8073	9.36248	9.47195
chr17	13104220	13110957	uc008alj.1	Mrpl18	10.6381	10.4901	8.84526	8.93576
chr19	8911418	8915736	uc008gnh.1	Gng3	8.39334	8.1758	6.60064	6.70925
chr6	8205935	8211141	uc009axl.2	Rpa3	8.91082	8.58452	7.12147	7.41117
chr8	88061538	88081170	uc009mqa.1	Dnaja2	11.1112	10.9093	9.325	9.26179
chr5	31795133	31814000	uc008wyi.1	Gpn1	10.3388	10.2614	8.55281	8.60455
chr2	154202049	154235820	uc008nje.2	Snta1	6.1833	6.622	4.399	4.65036
chr9	109776082	109796394	uc009rsw.1	Cdc25a	9.21853	9.17265	7.43463	7.74722
chr10	4539075	4547383	uc007egj.1	Fbxo5	8.5612	8.37002	6.77752	6.5028
chr14	22317075	22491355	uc007slg.1	Myst4	7.66604	7.58452	5.88443	5.12429
chr7	88356689	88478508	uc009ibt.1	Pde8a	5.85868	6.14395	4.07708	3.65036
chr4	40915975	40959641	uc008sic.1	Nfx1	4.85868	4.98045	3.07708	2.48043
chr5	108492760	108538021	uc008ynl.1	Mtf2	4.85868	4.14395	3.07708	2.48043
chr1	33510655	33728603	uc007anq.1	Prim2	8.90103	8.7203	7.12147	7.84675
chr12	103157110	103198453	uc007otv.2	Atxn3	7.4414	7.07806	5.66204	5.48043
chr3	131021903	131049841	uc008rjq.2	Sgms2	6.43914	6.29079	4.66204	4.80236
chr17	46337803	46379248	uc008csa.1	Xpo5	10.0826	9.88927	8.30589	8.49724
chr18	80448030	80489463	uc008fsu.2	Pqlc1	7.17521	7.35896	5.399	5.9067
chr12	75063516	75085807	uc007nwt.1	Snapc1	6.66025	6.29079	4.88443	5.33841
chr10	116488053	116502870	uc007hcs.1	Cct2	13.3743	13.2738	11.5987	11.7513
chr1	158358238	158406459	uc007dcj.1	Soat1	9.17385	9.08143	7.399	6.93986
chr9	54610614	54620916	uc009prp.1	Crabp1	7.1725	7.42406	5.399	5.23532
chr9	35073465	35083542	uc009otc.1	Rpusd4	8.9366	8.78368	7.16454	7.33841
chr3	63778064	63823000	uc008pke.1	Gmps	9.54924	9.08143	7.77752	7.89828
chr8	87185229	87188751	uc009mmr.2	Ier2	10.1517	10.4013	8.38086	8.32592
chr3	51026368	51055576	uc008pdm.2	Ccrn4l	4.84514	5.86016	3.07708	1.48043
chr8	96543302	96562939	uc009mvo.1	Nudt21	11.3529	11.1464	9.58487	9.72836
chr9	106722306	106783323	uc009rkp.2	Vprbp	9.57152	9.35062	7.805	7.41117
chr8	23519811	23540137	uc009ldc.2	Mrps31	7.42783	7.39188	5.66204	5.28779
chr7	137676039	137692895	uc009kad.2	Nsmce4a	10.4717	10.4464	8.70643	8.79784
chr13	46775270	46825218	uc007qhj.2	Nup153	10.8729	10.6034	9.1105	9.18434
chr8	119505727	119519349	uc009not.1	Gcsh	11.4241	11.16	9.66204	9.78193
chr10	77633654	77649894	uc007fxk.1	Pwp2	11.0179	11.0577	9.25699	9.5028
chr11	104985738	105002460	uc007lxa.2	Mettl2	9.29588	9.09482	7.53651	7.32592
chr10	93292299	93311283	uc011xlw.1	Usp44	6.64078	6.67645	4.88443	5.00399
chr9	36539997	36577163	uc009oty.1	Stt3a	11.5858	11.4154	9.83196	9.87489
chr1	181675034	181736146	uc011wxn.1	Ahctf1	9.82888	9.27911	8.07708	8.05029
chr11	80240116	80285635	uc007kmf.1	Psmd11	6.15064	6.16949	4.399	4.28779
chr6	135087536	135120233	uc009elh.1	Hebp1	6.41184	6.29079	4.66204	4.18087
chr4	116224132	116230548	uc012djj.1	Tmem69	9.46871	9.17265	7.72093	7.80236
chr16	14359652	14474967	uc007yhj.1	Abcc1	9.1465	9.21004	7.399	7.71884
chr16	38560971	38591497	uc007zfe.1	Tmem39a	5.82457	6.35896	4.07708	3.65036
chr17	29625989	29632404	uc008bsz.1	Pim1	5.82457	7.11796	4.07708	3.06539
chr16	18071818	18091283	uc007ymu.1	Prodh	7.99066	8.37551	6.247	6.65036
chr2	166888792	166890858	uc012cjm.1	Snord12	6.13958	5.86016	4.399	4.80236
chr12	58329398	58343155	uc007npl.2	Prps1l3	9.597	9.52889	7.85844	7.98823
chr18	67932529	67955141	uc008fmy.1	Seh1l	9.02335	9.23141	7.28653	6.92338
chr10	127994821	128004990	uc007hnl.1	Pa2g4	12.9727	12.9124	11.2369	11.3006
chr18	46755357	46769879	uc008evs.2	Eif1a	9.61656	9.4633	7.88443	7.59937
chr5	110713337	110766472	uc008yqm.2	Pole	8.667	8.51651	6.93506	6.88982
chr13	107735208	107750304	uc007rua.2	Dimt1	8.76197	8.56541	7.03127	6.93986
chr18	31961710	32068641	uc008eis.2	Wdr33	7.26696	7.24349	5.53651	5.48043
chr8	27266640	27274623	uc009lhq.2	Thap1	7.39101	7.49647	5.66204	6.28779
chr11	53073315	53115981	uc007ivq.1	Hspa4	10.4055	10.0178	8.67699	8.66034
chrX	149572500	149606486	uc012hqx.1	Rragb	7.80196	7.77954	6.07708	6.18087
chr19	41937340	41972643	uc008hmk.1	Rrp12	10.7885	10.9504	9.06576	9.47479
chr3	67232036	67278990	uc008plm.2	Gfm1	10.3388	10.1899	8.61623	8.64534
chr2	91514781	91552733	uc008kwn.1	Atg13	8.88623	8.92531	7.16454	7.33841
chr6	54985994	55029498	uc009cai.1	Gars	12.3141	12.1093	10.5928	10.8609
chr5	130721601	130733332	uc008zuj.1	Sbds	9.15408	9.10147	7.43463	7.37525
chr2	28913782	28943170	uc008izk.1	Ttf1	8.18868	7.81233	6.46939	6.33841
chr3	116442916	116513084	uc008rcq.1	Agl	6.37931	5.69415	4.66204	4.65036
chr16	96343194	96351332	uc008aco.1	Hmgn1	12.7915	12.6837	11.0743	11.3963
chr17	25079414	25099568	uc008azj.1	Hn1l	11.332	11.2951	9.61623	9.3813
chr7	57031727	57113635	uc009hbt.1	Prmt3	8.8366	8.46588	7.12147	7.51385
chr4	141239477	141281334	uc008vpd.1	Ddi2	8.87627	9.11138	7.16454	7.37525
chr17	80599419	80608645	uc008dqr.2	Sfrs7	7.36988	6.96595	5.66204	6.00399
chr11	34622686	34649143	uc007ilc.2	Ccdc99	7.24134	7.14395	5.53651	6.00399
chr11	105944215	106016748	uc007lyc.1	Map3k3	9.56275	9.65175	7.85844	8.41117
chr12	34112488	34124245	uc007niu.1	Twistnb	7.10306	6.92156	5.399	5.52483
chr11	35621882	35650030	uc007ilh.2	Rars	9.91041	9.75234	8.20636	8.49724
chr7	148644992	148652501	uc009klj.2	Efcab4a	5.36514	5.58452	3.66204	1.48043
chr6	66985089	66989401	uc009cfc.1	Gadd45a	8.63783	8.69415	6.93506	6.52483
chr10	75233977	75238119	uc007fra.1	Ddt	8.86709	8.96959	7.16454	7.5028
chr3	122120697	122233100	uc008req.2	Bcar3	8.86625	9.16949	7.16454	7.09514
chr8	4259730	4277905	uc009ktq.2	Timm44	9.23745	8.98405	7.53651	7.23532
chr18	14939753	15058868	uc008edl.2	Taf4b	7.47696	7.10478	5.77752	5.9067
chr11	72019055	72023989	uc007jyj.1	Txndc17	9.2676	9.21004	7.56893	8.12429
chr18	65740179	65849090	uc008ffe.2	mKIAA1629	4.77543	5.03704	3.07708	2.48043
chr15	97505535	97538253	uc007xkv.1	Rpap3	8.41871	8.24949	6.72093	6.82028
chr19	3281046	3291197	uc008fwd.1	Mrpl21	7.23356	6.42406	5.53651	4.87275
chr12	40929715	40951776	uc007nky.2	Ifrd1	9.65443	9.33941	7.95972	7.82028
chr9	63800882	63871866	uc009qbk.2	Smad6	5.35562	5.95131	3.66204	2.48043
chr5	37257808	37346317	uc008xfe.1	Ppp2r2c	6.57665	6.74599	4.88443	5.23532
chr8	8666575	8692537	uc009kug.1	Arglu1	8.46705	7.94393	6.77752	6.43463
chrX	131071796	131078168	uc009ugd.1	Timm8a1	9.71899	9.55576	8.03127	7.94804
chr11	102699785	102744289	uc011yfw.1	Eftud2	11.2479	11.3926	9.56089	9.96425
chr19	5940542	5966206	uc008ggb.2	Pola2	7.22312	7.16949	5.53651	6.26179
chr1	95238221	95264195	uc007cdv.1	Ppp1r7	9.08444	8.87187	7.399	7.30061
chr1	92098577	92112863	uc007bzh.1	Cxcr7	6.083	5.89118	4.399	4.28779
chr5	130339310	130356954	uc008ztm.1	Phkg1	6.56843	6.40269	4.88443	3.80236
chr12	103991484	103998020	uc011yqr.1	AK010878	6.76107	6.89118	5.07708	4.48043
chr7	36364012	36372601	uc009gkb.1	Rgs9bp	4.76107	4.14395	3.07708	0.480432
chr8	108658969	108662620	uc009nfh.1	AK007545	4.76107	4.92156	3.07708	1.48043
chr5	125027156	125047689	uc012edo.1	Gtf2h3	10.4993	10.2791	8.81854	8.87704
chr6	71338627	71392631	uc009cgu.2	Rmnd5a	7.45707	7.38099	5.77752	6.09514
chr6	134959629	134973794	uc009eld.2	Ddx47	10.4969	10.2879	8.81854	8.65536
chr2	163897913	163981257	uc008ntt.1	Stk4	8.75293	8.88734	7.07708	7.19468
chr4	134301326	134325919	uc012dmx.1	Ldlrap1	5.33638	5.69415	3.66204	2.80236
chr2	163552319	163577913	uc008ntl.1	Ada	7.65637	7.89118	5.98397	5.87275
chr17	36047329	36055314	uc008cjg.1	Mrps18b	8.13958	7.94393	6.46939	6.82028
chr19	36906721	36967967	uc008hhu.2	Tnks2	11.4187	11.1544	9.7495	9.73073
chr7	86535223	86595150	uc009hyh.1	Fanci	7.83318	7.70292	6.16454	6.36307
chr8	114292372	114380210	uc009nmx.1	Cfdp1	9.62749	9.4787	7.95972	8.06539
chr8	96591853	96624711	uc009mvs.1	Bbs2	7.98449	8.09815	6.325	6.33841
chr4	55360913	55405109	uc012dej.1	Rad23b	12.3314	12.3377	10.6733	10.5411
chr15	78903652	78924830	uc007wsk.1	Eif3l	11.3774	11.3673	9.72093	10.1617
chr5	130291260	130322231	uc008zti.1	Cct6a	12.5753	12.4742	10.9194	10.8046
chr11	59011294	59017887	uc007jdh.1	AK162965	4.73193	4.98045	3.07708	1.48043
chr17	71115178	71157399	uc008dln.1	AK082862	4.73193	4.72891	3.07708	0.480432
chr8	128256102	128263077	uc009nyj.2	Ntpcr	5.31689	5.76286	3.66204	3.06539
chr2	154260219	154352149	uc012cgv.1	Cbfa2t2	5.31689	4.72891	3.66204	2.48043
chr9	99378809	99471318	uc009ref.2	Armc8	7.31443	7.32528	5.66204	5.72836
chr2	130098147	130105049	uc008mil.1	Nop56	11.2914	11.1922	9.63932	10.0079
chr15	34413776	34427001	uc007vlt.2	Hrsp12	6.53507	6.09148	4.88443	5.00399
chr17	57142824	57152711	uc008ddp.1	Gtf2f1	10.521	10.7857	8.87149	9.29742
chr8	113498890	113523723	uc009nll.2	Ddx19a	10.0991	9.99302	8.45212	8.85112
chr14	8998504	9007506	uc007sev.1	Pdhb	11.1669	10.9485	9.52002	9.40524
chr2	27368666	27392055	uc012bsw.1	Wdr5	11.3236	11.3789	9.67699	9.83578
chr9	96977429	97013460	uc009rdb.1	Slc25a36	8.36751	8.14395	6.72093	6.20835
chr19	38862617	38895727	uc008hjr.2	Noc3l	8.85023	8.31388	7.20636	6.95617
chr11	72948985	72953796	uc007jzz.2	Gsg2	8.62699	8.53135	6.98397	7.01959
chr11	97175029	97191234	uc007ldx.2	Mrpl45	11.2353	11.0671	9.59278	9.82916
chr10	121024435	121065372	uc007hfv.1	Xpot	11.227	11.0814	9.58487	9.79331
chr3	121946509	121969566	uc008reo.1	Gclm	9.24134	9.19458	7.60064	7.54652
chr15	99053406	99073248	uc011zzc.1	Kcnh3	4.71713	4.92156	3.07708	1.48043
chr4	108237471	108253941	uc008ubf.2	Prpf38a	9.38809	9.29949	7.7495	7.6996
chr2	72312275	72324947	uc008kbx.1	Cdca7	11.3077	11.1229	9.66953	9.7612
chr16	23107025	23109093	uc012adr.1	Snord2	6.52236	6.00902	4.88443	4.56789
chr15	100133247	100144779	uc007xqv.1	Mettl7a1	6.03011	5.622	4.399	4.72836
chr18	62663712	62710397	uc012bdv.1	Fbxo38	8.75112	8.68089	7.12147	7.19468
chr9	50663039	50689727	uc009pkv.1	Ppp2r1b	8.75021	8.75866	7.12147	6.97228
chr2	3339402	3372626	uc008idz.2	Dclre1c	8.28714	8.07806	6.66204	6.52483
chr12	12942898	12950642	uc007nbg.2	Mycn	4.70218	4.92156	3.07708	0.480432
chr5	122017695	122045833	uc008zjt.1	Aldh2	7.7003	7.78781	6.07708	6.00399
chr2	120332565	120391567	uc008lwc.1	Zfp106	10.1759	10.1064	8.55281	8.68989
chr16	35926600	35941113	uc007zbv.1	Dtx3l	6.69842	6.16949	5.07708	5.06539
chr2	31524256	31536827	uc008jdy.1	Exosc2	10.4221	10.3309	8.805	8.92752
chr17	36278693	36284689	uc008ckj.1	AK161769	6.50092	6.58452	4.88443	4.06539
chr6	143113749	143157066	uc009eqf.2	Etnk1	10.0509	9.94393	8.43463	8.41117
chr14	76245137	76250105	uc007ura.1	Tpt1p	5.27709	5.09148	3.66204	3.28779
chr17	46910855	46921605	uc008cuj.1	Rpl7l1	11.3053	11.0231	9.69179	9.74956
chr10	75236866	75246159	uc007frb.1	Gstt3	6.68707	6.71164	5.07708	5.48043
chr12	57712383	57716271	uc007nph.1	Nkx2-9	4.68707	5.42406	3.07708	0.480432
chr14	14944698	14955418	uc007sgj.1	Psmd6	10.0067	9.82845	8.399	8.82916
chr3	79393310	79407572	uc008pnp.1	Ppid	9.7892	9.60572	8.1856	8.10979
chr10	66729436	66750029	uc007flw.1	Nrbf2	8.06996	7.88349	6.46939	6.45771
chr12	82674550	82697945	uc007ocl.1	Med6	8.58278	8.39188	6.98397	7.01959
chr14	76902316	76907573	uc007urk.2	Tsc22d1	9.23031	9.07806	7.63167	7.76583
chr10	84594444	84649799	uc007gle.1	Cry1	9.65249	9.67867	8.05436	8.33218
chr5	110703304	110717187	uc008yqj.1	Pxmp2	7.13402	7.06452	5.53651	5.97228
chr2	13197964	13415503	uc008ijz.1	Cubn	4.6718	5.14395	3.07708	0.480432
chr1	120216419	120230408	uc007cic.2	Mki67ip	8.95405	8.67199	7.36248	7.05029
chr3	105481379	105492489	uc008qva.1	Ddx20	9.12704	9.07806	7.53651	7.26179
chr5	122820516	122832778	uc008zle.1	Gpn3	9.73239	9.72891	8.14317	7.92338
chr5	77737508	77778353	uc008xwe.2	Polr2b	10.2034	10.0797	8.61623	8.66034
chr6	49035216	49166953	uc009bwi.2	Igf2bp3	9.27772	9.03008	7.69179	7.3508
chr11	22888592	22903336	uc007ieo.1	Cct4	10.3761	9.89693	8.79132	8.85981
chr18	67564417	67610790	uc008fmf.1	Afg3l2	7.56843	7.86798	5.98397	6.38732
chrX	47916296	47990435	uc009tdq.2	6720401G13Rik	6.2465	6.03704	4.66204	3.06539
chr17	45704726	45712210	uc008cqz.1	Hsp90ab1	15.8624	15.8402	14.2792	14.267
chr6	25693734	25761226	uc009bce.1	Pot1a	6.66025	6.48634	5.07708	5.23532
chr18	34791336	34813390	uc008elc.1	Cdc23	9.63439	9.31101	8.05436	8.20835
chr17	26759127	26780827	uc008beg.1	Ergic1	4.65637	4.42406	3.07708	3.48043
chr4	107478637	107497627	uc008uaf.1	AK140147	4.65637	4.03704	3.07708	1.48043
chr6	30489641	30514473	uc009bfn.1	Cpa2	4.65637	4.98045	3.07708	2.48043
chr10	126634122	126650678	uc007hiq.2	Pip4k2c	8.97753	8.77539	7.399	7.59937
chr6	64990660	64994195	uc009cec.1	mKIAA1122	6.46151	6.29079	4.88443	5.12429
chr15	36525412	36540728	uc007vmx.2	Pabpc1	11.541	11.6974	9.96582	9.49445
chr16	20715898	20722338	uc007yqz.1	Polr2h	9.97208	9.70728	8.399	8.61486
chr13	101529640	101547854	uc007rrn.1	Cenph	6.81766	6.50652	5.247	5.28779
chr2	25207809	25213852	uc008irq.1	Dpp7	8.45261	8.64948	6.88443	7.01959
chr11	43543507	43563475	uc007imx.1	Ttc1	9.00215	8.69854	7.43463	7.58896
chr1	120195094	120209709	uc007cib.1	Tsn	11.1281	10.8835	9.56089	9.69475
chr11	97606783	97629927	uc007ler.2	Cwc25	8.28589	8.07806	6.72093	6.52483
chr5	21289100	21309602	uc008wpd.1	Psmc2	9.96349	9.69635	8.399	8.77045
chr5	137504129	137509221	uc009abl.1	Vgf	4.64078	5.65852	3.07708	1.48043
chr7	26470020	26490015	uc009ftq.1	Tgfb1	5.22574	5.76286	3.66204	3.48043
chr1	162970743	163002763	uc007dey.1	Dars2	7.54558	7.21924	5.98397	6.18087
chr11	33052510	33065056	uc007ikd.1	Npm1	9.80547	9.68089	8.247	7.87275
chr1	37473929	37488948	uc007aro.2	6330578E17Rik	10.6346	10.5509	9.07708	9.23866
chr1	133691971	133714692	uc007cnt.2	Pm20d1	5.95642	5.98045	4.399	1.48043
chr12	73860197	73888382	uc007nvt.2	Ppm1a	5.95642	5.69415	4.399	3.06539
chr7	28336313	28367117	uc009fwo.2	2310022A10Rik	5.95642	6.3366	4.399	4.65036
chr6	87768441	87790753	uc009cub.1	Isy1	10.0601	9.99302	8.50334	8.74722
chr10	21864109	21870629	uc007epc.1	AK053193	5.63292	6.35896	4.07708	3.93986
chr1	74706327	74744547	uc007bmy.1	Ttll4	9.74018	9.8103	8.1856	8.30698
chr18	53334018	53380514	uc008exr.1	Snx2	8.43802	8.51651	6.88443	7.30061
chr14	58425397	58447000	uc007udp.1	F630043A04Rik	7.94852	7.53627	6.399	6.12429
chr3	95547775	95560900	uc008qkv.2	Tars2	4.62501	4.72891	3.07708	2.80236
chr10	118635867	118679111	uc007hec.2	Cand1	11.7117	11.5521	10.1645	10.2667
chr19	5048807	5057071	uc008gca.1	Rin1	6.79317	6.99481	5.247	5.52483
chr14	60836912	60872215	uc007uey.1	Nupl1	8.26569	8.28496	6.72093	6.45771
chr9	49245065	49296330	uc009pjc.1	Ttc12	5.20468	5.69415	3.66204	1.48043
chr10	52135352	52159998	uc007fbi.2	Nus1	8.57357	8.34222	7.03127	7.09514
chr8	128950551	129000965	uc012gne.1	Tarbp1	8.61905	8.64038	7.07708	7.42295
chr6	82596705	82604859	uc009clk.1	Pole4	8.66121	8.40806	7.12147	7.13864
chr9	114308212	114320319	uc009rxh.2	Tmppe	8.66025	8.76286	7.12147	7.31332
chr8	37279117	37314570	uc009llj.1	Lonrf1	6.93739	6.99481	5.399	5.43463
chr10	43196945	43235223	uc011xdl.1	Bend3	9.70218	9.74599	8.16454	8.20153
chr12	79961058	79987997	uc007nzk.1	Eif2s1	10.5213	10.2762	8.98397	8.84238
chr4	116791822	116800330	uc008uhy.2	Btbd19	6.19936	6.11796	4.66204	4.06539
chr3	32605467	32625893	uc012coo.1	Actl6a	11.414	11.2908	9.87798	10.1116
chr18	52623346	52650392	uc008exd.1	Srfbp1	8.25677	8.11796	6.72093	6.72836
chr16	20279893	20304435	uc007ypm.1	Parl	8.51916	8.23141	6.98397	7.18087
chr5	29759206	29778709	uc008wuj.1	Nom1	9.03831	9.00902	7.50334	7.98823
chr18	65796403	65849090	uc008fff.2	Zfp532	8.36396	8.27323	6.83196	7.10979
chr11	97309473	97363714	uc007lec.1	Arhgap23	7.77899	7.95865	6.247	6.74722
chr4	49525468	49535955	uc008svu.1	Mrpl50	8.60606	8.51152	7.07708	7.38732
chr4	40206638	40218874	uc008shi.1	Topors	9.41126	9.21618	7.88443	7.82028
chr5	21992306	22058149	uc008wpq.1	Orc5	9.27583	8.88349	7.7495	7.45771
chr4	116228331	116266487	uc008ugr.1	Gpbp1l1	10.3846	10.2495	8.85844	8.69475
chr10	42396722	42422261	uc007eyv.1	Ostm1	6.76827	6.84439	5.247	5.80236
chr6	67214981	67219348	uc012ena.1	AK158095	6.76827	6.79603	5.247	4.65036
chr5	114062363	114102399	uc012ebo.1	Cmklr1	5.1833	5.89118	3.66204	3.06539
chr11	82575846	82581124	uc007kmy.1	Zfp830	8.35203	8.1245	6.83196	6.93986
chr2	28693925	28761095	uc008izg.2	Ddx31	9.15064	9.0405	7.63167	7.52483
chr17	13198704	13210985	uc008alv.1	Sod2	10.4783	10.2835	8.95972	8.86414
chr10	41237305	41250848	uc007exv.1	Cd164	10.2087	10.1961	8.69179	8.89828
chr9	18094710	18118444	uc009ogm.1	Chordc1	8.34724	8.1758	6.83196	7.12429
chr7	20488926	20508492	uc009fno.2	Pvr	7.67946	7.75445	6.16454	6.33841
chr11	76033896	76059201	uc007kfl.2	Glod4	8.29214	8.00193	6.77752	6.65036
chr12	17271400	17291576	uc007ncp.1	Pdia6	9.42442	9.12123	7.90997	8.05786
chr2	152050575	152107587	uc008nfa.2	Csnk2a1	11.3143	11.148	9.805	9.77735
chr9	15108657	15118476	uc009ofq.2	Taf1d	8.58482	8.57977	7.07708	6.98823
chr16	13538056	13670263	uc007ygc.1	Parn	6.58482	6.3366	5.07708	5.38732
chr1	59739849	59768354	uc007bdy.1	Nop58	9.70967	9.20696	8.20636	8.33841
chr15	98373641	98400714	uc007xmv.1	Ccnt1	7.90185	7.77954	6.399	6.45771
chr1	74550633	74577416	uc007bmf.2	Rqcd1	11.574	11.381	10.0714	9.93164
chr13	73899144	73954190	uc007red.1	Slc12a7	7.27961	7.19458	5.77752	5.18087
chr1	137198111	137212314	uc007csz.1	Timm17a	10.9006	10.8552	9.399	9.65536
chr6	116156050	116212689	uc009djs.2	D6Wsu116e	7.97053	7.86016	6.46939	6.97228
chr6	71552736	71573668	uc009chb.1	Kdm3a	4.57665	4.79603	3.07708	2.80236
chr1	55142991	55148161	uc007bac.2	Hspe1	12.1672	12.0388	10.6695	10.3933
chr1	63221404	63227060	uc007bfz.2	Eef1b2	13.6842	13.4894	12.1869	12.2168
chr11	75544388	75579343	uc007ket.2	Ywhae	9.21393	8.91403	7.72093	7.77505
chr11	64790536	64815578	uc007jks.2	Elac2	10.5583	10.7181	9.06576	9.40227
chr11	86749926	86809264	uc007ktd.1	Ypel2	5.56843	5.24349	4.07708	4.28779
chr2	142886804	142897788	uc008mqb.1	Snrpb2	8.88953	8.66303	7.399	7.37525
chr2	150733329	150757016	uc008mus.2	Gins1	6.88871	6.87575	5.399	5.23532
chr3	153585322	153609396	uc008ruj.1	Acadm	8.88871	8.87963	7.399	7.2219
chr19	29062983	29092059	uc008hcv.1	Cdc37l1	7.73376	7.40269	6.247	5.56789
chr2	91549106	91561723	uc008kwp.1	Harbi1	5.8854	5.50652	4.399	4.38732
chr1	138362424	138428088	uc007cuv.1	Kif14	7.80721	7.49647	6.325	5.9067
chr4	40682681	40706918	uc008shu.2	Smu1	9.76377	9.45554	8.28653	8.32592
chr11	52043496	52060360	uc007ivf.2	Skp1a	11.0911	10.7181	9.61623	9.83798
chr15	34234435	34277600	uc007vll.1	Matn2	5.8721	6.29079	4.399	4.80236
chr8	110104279	110114382	uc009nhz.2	Psmd7	10.5594	10.5618	9.0883	9.21175
chr4	44311788	44377547	uc008srv.1	Melk	9.85108	9.90645	8.38086	8.31964
chr6	114954398	114989892	uc009dij.1	1500001M20Rik	7.45261	7.34782	5.98397	6.36307
chr8	34761709	34808634	uc009lkf.1	Gsr	11.6365	11.6914	10.1698	10.2926
chr12	66016897	66025578	uc007nqo.1	Gm527	5.12844	5.03704	3.66204	3.65036
chr15	56497181	56528101	uc007vsl.2	Has2	4.54348	4.3366	3.07708	0.480432
chr15	102065370	102089914	uc007xvd.1	Rarg	4.54348	5.03704	3.07708	0.480432
chr10	43986163	44084097	uc007ezt.1	Atg5	8.54033	8.51651	7.07708	7.55725
chr16	35020506	35109261	uc007zbi.1	Ptplb	8.18196	8.07806	6.72093	6.36307
chr5	144748777	144777722	uc009ale.1	Ccz1	9.70733	9.50652	8.247	8.10248
chr4	131907847	131911601	uc008vbf.2	Snhg3	9.06046	8.98045	7.60064	7.52483
chr2	181334023	181390366	uc008omz.1	Prpf6	8.70593	8.81233	7.247	7.70925
chr1	187184973	187233630	uc007dzf.1	Eprs	5.53507	5.38099	4.07708	3.93986
chr10	77360319	77367281	uc007fwi.2	Lrrc3	5.53507	5.92156	4.07708	3.80236
chr1	129668740	129702509	uc007cla.1	Ccnt2	6.34122	6.40269	4.88443	2.48043
chr19	44183126	44212366	uc008hpj.1	Cwf19l1	7.85362	7.622	6.399	6.65036
chr1	95195787	95204447	uc007cdo.1	Mterfd2	7.53084	7.68532	6.07708	6.12429
chr13	54560197	54572201	uc007qod.2	Thoc3	10.8877	10.9206	9.43463	9.41707
chr6	142703205	142724234	uc009eps.2	Cmas	9.83275	9.80827	8.38086	8.55725
chr11	3243299	3273395	uc007hst.1	Limk2	6.11157	6.54605	4.66204	4.93986
chr11	40492815	40510705	uc007ilq.2	Mat2b	4.52661	4.03704	3.07708	2.48043
chr7	75416724	75507976	uc009hjf.1	Fam169b	4.52661	4.72891	3.07708	2.06539
chr9	37456766	37466897	uc009ovh.1	Tbrg1	10.9179	10.8988	9.46939	9.95414
chr5	25195633	25213615	uc008wta.1	Xrcc2	8.73468	8.27911	7.28653	7.26179
chr1	79698836	79760344	uc007bqu.2	Wdfy1	8.65249	8.55092	7.20636	7.28779
chr19	29684372	29724910	uc008hdu.1	Ermp1	9.01506	8.77539	7.56893	7.31332
chrX	159196303	159217022	uc009uug.2	Rbbp7	8.97985	8.88734	7.53651	7.3508
chr18	35711063	35717970	uc008emf.1	AK080350	6.84173	6.72891	5.399	4.72836
chr2	62500383	62532166	uc008jvp.1	Gca	5.5181	6.06452	4.07708	3.65036
chr2	128752003	128771756	uc008mgz.1	Zc3h8	6.83832	6.29079	5.399	4.72836
chr17	29387779	29402916	uc008bsm.1	Ppil1	10.783	10.8404	9.34386	9.65286
chr7	88905838	88914376	uc009icl.1	Fam103a1	8.421	8.42935	6.98397	6.52483
chr6	122822574	122838959	uc009dpt.1	Necap1	9.24198	9.0474	7.805	7.94804
chr7	104843200	104867389	uc009ijr.1	Clns1a	11.479	11.3038	10.0429	10.0841
chr8	109936388	109950938	uc009nhr.1	Nob1	9.48899	9.49647	8.05436	8.04267
chr7	133690424	133711880	uc009jrw.1	Eif3c	11.8909	11.832	10.4565	10.4705
chr4	107038388	107086943	uc008tzt.1	Tmem48	9.7967	9.77954	8.36248	8.83798
chr18	36563332	36616149	uc008enk.1	Pfdn1	10.279	9.88542	8.84526	8.96425
chr9	58500662	58591366	uc009pxh.2	2410076I21Rik	4.50953	5.09148	3.07708	0.480432
chr12	45306883	45313055	uc007nlo.1	Dnajb9	7.20733	6.89118	5.77752	5.80236
chr6	120745261	120774703	uc009dnr.1	Atp6v1e1	10.6253	10.359	9.19602	9.33841
chr9	69299489	69339592	uc009qng.1	Anxa2	7.59295	7.60338	6.16454	6.20835
chr5	123298196	123318954	uc008zmp.1	Rnf34	9.08876	8.94762	7.66204	7.36307
chr15	83392002	83404633	uc007xbg.2	Tspo	6.96271	6.90645	5.53651	4.72836
chr2	148230206	148235924	uc008mtd.2	Thbd	8.78787	8.89884	7.36248	7.51385
chr12	32611319	32637400	uc007nhu.2	Hbp1	6.95957	7.09148	5.53651	5.18087
chr1	37927050	37933143	uc007ash.2	Lipt1	6.82112	6.87575	5.399	5.52483
chr15	76707751	76722824	uc007wmr.1	Zfp7	5.083	4.65852	3.66204	2.80236
chr8	23519811	23536668	uc009ldb.2	Mrps31	5.083	5.24349	3.66204	2.06539
chr16	37509881	37541855	uc007zeb.1	Gtf2e1	9.79845	9.69635	8.38086	8.44043
chr10	5912188	5920447	uc007ehc.2	Rmnd1	4.49226	4.03704	3.07708	2.80236
chr6	124854376	124863723	uc009dsl.2	Lag3	4.49226	4.86016	3.07708	2.06539
chr5	35434154	35450346	uc008xdo.1	Lrpap1	10.5141	10.622	9.09944	9.39032
chr14	8648470	8784101	uc007sek.1	Flnb	12.3862	12.5212	10.9719	11.1625
chr8	129458449	129471730	uc009nza.1	Tomm20	12.2526	12.3939	10.8386	10.6948
chr16	57302112	57608980	uc007zng.2	2610528E23Rik	7.8771	7.64948	6.46939	6.70925
chrX	131122707	131137544	uc009ugg.1	Gla	8.23745	8.07131	6.83196	6.70925
chr8	59010318	59031363	uc009lsp.1	BC088983	7.65249	7.55576	6.247	5.9067
chr13	45483110	45507309	uc007qgz.1	Mylip	5.80372	5.76286	4.399	3.65036
chr6	88833467	88850774	uc009cvx.2	Mcm2	12.7831	12.9874	11.3786	11.5758
chr6	83255697	83269598	uc009cne.2	Mthfd2	9.78388	9.64721	8.38086	8.63018
chr17	85355340	85414116	uc008dtg.2	Ppm1b	6.28714	6.76286	4.88443	4.06539
chr17	25019555	25025295	uc008ayo.2	Nubp2	9.92175	10.0474	8.52002	9.01571
chr4	136023675	136105233	uc008vif.1	Luzp1	8.60706	8.27323	7.20636	6.43463
chr3	145309934	145314949	uc008rqq.2	Cyr61	9.96857	10.0301	8.56893	8.61486
chr7	13418158	13435933	uc009fej.2	Zfp110	8.72455	8.39729	7.325	7.23532
chr1	162123390	162131317	uc007def.1	Mrps14	9.38224	9.17895	7.98397	8.18087
chr12	34640535	34644696	uc007niw.1	Twist1	5.47477	5.46588	4.07708	3.65036
chr18	66140392	66164289	uc008ffn.2	Lman1	8.64469	8.5606	7.247	7.33841
chr18	67825154	67886275	uc008fmv.2	Ptpn2	4.47477	4.42406	3.07708	2.80236
chr18	36926181	36944859	uc008eop.2	Hars	10.4952	10.3506	9.09944	9.39929
chr8	42425996	42462051	uc012gcr.1	Asah1	7.37931	7.45554	5.98397	6.28779
chr2	75668233	75769407	uc008ket.2	Agps	8.55912	8.22534	7.16454	7.28779
chr9	15064794	15086311	uc009ofl.1	Med17	9.81027	9.60806	8.41693	8.15991
chr1	37935734	37949256	uc007asi.1	Mitd1	6.47036	6.40269	5.07708	5.33841
chr4	118291403	118300381	uc008ukn.2	Ebna1bp2	10.599	10.6517	9.20636	9.58896
chr1	39042658	39054081	uc007atc.1	Pdcl3	8.67755	8.82444	7.28653	7.3508
chr7	19795886	19809525	uc009flb.2	Gpr4	5.04795	5.14395	3.66204	3.28779
chr14	76243062	76248110	uc007uqz.2	Tpt1	13.4751	13.2649	12.0897	12.3177
chr8	114490807	114518202	uc009nnc.1	Adat1	6.92135	7.19458	5.53651	5.38732
chr11	3547496	3590375	uc007htm.1	Morc2a	7.46151	7.67645	6.07708	6.31332
chr11	60589026	60601789	uc007jgn.1	Smcr8	8.4604	8.31388	7.07708	6.98823
chr16	90218986	90226569	uc007zvz.1	Sod1	12.4884	12.5255	11.1077	11.3933
chr4	129011269	129024273	uc008uwu.1	Zbtb8os	5.45707	5.09148	4.07708	3.65036
chr2	113926908	114003075	uc008lqd.2	Aqr	7.36277	7.55576	5.98397	5.87275
chr6	71762990	71775778	uc009chd.2	Mrpl35	8.81331	8.69854	7.43463	7.72836
chr17	13895547	14042801	uc008amr.1	Mllt4	7.84684	7.97322	6.46939	6.56789
chr18	9705645	9877993	uc008eak.2	Colec12	5.77543	5.58452	4.399	3.65036
chr4	128938973	128942245	uc008uwp.1	AK077492	5.77543	5.69415	4.399	4.18087
chr11	3861977	3880007	uc007hua.1	Pes1	11.9004	11.9183	10.5242	10.6466
chr2	132075021	132080916	uc008mml.1	Pcna	12.1775	11.9173	10.8016	10.8663
chr4	15190966	15213900	uc008sbk.2	Tmem64	9.09593	9.13426	7.72093	7.54652
chr15	101902203	101927604	uc007xuk.2	Eif4b	12.5416	12.3331	11.1672	11.1134
chr1	164601915	164672687	uc007dgr.1	Prrc2c	5.03608	4.86016	3.66204	3.48043
chr5	116099294	116183568	uc008zel.1	Ccdc64	5.03608	5.50652	3.66204	3.48043
chr3	96515817	96533362	uc008qoa.2	Polr3c	7.53718	7.46588	6.16454	5.72836
chr17	26387854	26422449	uc008beb.1	Luc7l	9.42669	9.30526	8.05436	8.08035
chr18	12325238	12348478	uc008eca.1	3110002H16Rik	7.97208	7.99481	6.60064	6.63018
chr11	52172616	52202898	uc007ivm.1	Vdac1	12.4085	12.4471	11.0371	11.2185
chr1	16093962	16122631	uc007ajm.1	Rdh10	6.90512	6.60338	5.53651	5.68989
chr15	59163551	59207707	uc007vxt.1	E430025E21Rik	8.96818	8.74174	7.60064	7.06539
chr10	13270712	13283182	uc007ela.2	Adat2	7.44365	7.60338	6.07708	5.80236
chr13	107584518	107728995	uc007rtx.1	Ipo11	8.52979	8.30238	7.16454	7.32592
chr6	72268669	72297169	uc009cif.1	Usp39	9.96466	9.82041	8.60064	8.79331
chr10	53314766	53329021	uc007fbr.1	Asf1a	8.56946	8.37551	7.20636	7.03502
chr12	4890713	4916326	uc007mys.1	Ubxn2a	4.43914	4.50652	3.07708	2.80236
chr5	140893258	140919312	uc009ahr.1	Eif3b	12.1922	12.2543	10.832	11.1386
chr6	91464028	91472614	uc009cye.1	Lsm3	10.4247	10.282	9.06576	8.96425
chr11	76757157	76800891	uc007kge.2	Blmh	10.8868	10.7192	9.52829	9.72836
chr8	114533258	114544428	uc012gla.1	Terf2ip	7.75746	7.58452	6.399	6.41117
chr4	116476607	116482164	uc008uhk.1	Toe1	9.38926	9.34782	8.03127	8.35695
chrX	91009954	91079434	uc009tsx.1	Pdk3	8.68137	8.53135	7.325	7.38732
chr8	126476358	126509022	uc009nwv.1	Abcb10	8.98681	8.93651	7.63167	7.82916
chr1	39422695	39428755	uc007atf.2	Rpl31	7.3388	7.32528	5.98397	6.33841
chr4	32742093	32862192	uc008sfa.1	Mdn1	9.18667	9.13101	7.83196	7.6996
chr2	121879261	121946122	uc008mac.2	Spg11	8.92296	8.71597	7.56893	7.6403
chr5	144859304	144949073	uc009alg.1	Lmtk2	10.5287	10.6278	9.17511	9.25192
chr7	116845250	116855695	uc009jdy.1	D930014E17Rik	7.12844	7.11796	5.77752	4.87275
chr1	71601729	71609772	uc007bjr.2	Atic	5.01203	5.46588	3.66204	2.80236
chr13	113716000	113759395	uc007rwx.1	Dhx29	8.06996	7.72891	6.72093	6.28779
chr4	125841326	125881954	uc008usv.1	Thrap3	10.1809	10.2085	8.83196	8.57846
chr5	34981184	35004797	uc008xcx.1	Nop14	8.18061	7.88349	6.83196	6.76583
chr11	115423757	115445238	uc007mhx.2	Nup85	11.1872	11.0483	9.83863	10.0389
chr8	126327895	126359191	uc009nwo.2	Rab4a	8.67085	8.75866	7.325	7.55725
chr3	116334084	116367595	uc008rco.2	Hiat1	9.54924	9.4425	8.20636	8.34462
chr2	11507065	11526826	uc008iio.1	Rbm17	10.419	10.4774	9.07708	9.21514
chr8	32269939	32281196	uc009lji.1	Mak16	10.1732	9.93837	8.83196	8.56789
chr1	38109630	38188507	uc007asr.1	Rev1	6.41642	6.67645	5.07708	4.93986
chr3	88285070	88309254	uc008pvj.2	Lmna	7.87377	7.82845	6.53651	6.82028
chr11	86891233	86902279	uc007ktg.1	1200011M11Rik	7.41413	7.03704	6.07708	5.97228
chr4	149118144	149150376	uc008vxe.1	Slc25a33	7.7356	7.79603	6.399	6.87275
chr10	75922311	75933859	uc007fuo.1	Ybey	8.36751	8.21311	7.03127	7.18087
chrX	156560150	156578268	uc009utc.1	Pdha1	11.1715	11.1334	9.83863	9.94396
chr10	114634926	114690549	uc007hax.2	Tbc1d15	5.99373	6.35896	4.66204	4.28779
chr15	36926781	36939157	uc007vnb.1	Zfp706	10.4939	10.3986	9.16454	9.13148
chr1	155302887	155336790	uc007czy.1	Dhx9	7.20997	7.05084	5.88443	5.28779
chr1	163018508	163063610	uc007dff.1	Klhl20	4.98758	5.24349	3.66204	3.48043
chr4	80554589	80600205	uc008tjv.1	D4Bwg0951e	6.20997	6.16949	4.88443	4.87275
chr17	15658538	15666265	uc008aoq.1	Pdcd2	9.10092	8.88734	7.77752	7.6801
chr6	81907839	81917943	uc009clf.1	Mrpl19	9.92377	9.85032	8.60064	8.31964
chr4	129392102	129421526	uc008uyd.1	Khdrbs1	8.48681	8.31959	7.16454	6.60971
chr15	31520638	31533559	uc007vkj.1	Cct5	13.0537	12.9411	11.7335	11.8802
chr6	91414269	91425417	uc009cyb.1	Chchd4	10.0553	9.82041	8.73529	8.63018
chr15	80083613	80087971	uc007wvl.1	Atf4	11.9564	11.8931	10.6393	10.9254
chr13	14703508	14717940	uc007pnl.1	Psma2	11.3297	11.2093	10.0137	10.1634
chr13	38737559	38752897	uc007qdw.1	Eef1e1	8.94694	8.97322	7.63167	7.28779
chr9	56796730	56831006	uc009ptr.1	Snupn	6.19936	5.95131	4.88443	4.65036
chr17	32171106	32199807	uc008bvt.2	Rrp1b	6.70967	6.82845	5.399	5.60971
chr2	5764079	5789782	uc008ifv.1	Nudt5	10.3764	10.1663	9.06576	9.19468
chr16	18240071	18250787	uc007ymy.1	Ranbp1	11.9293	11.8719	10.6201	10.6628
chrX	72355071	72378288	uc009tpp.1	Mpp1	6.55601	6.24349	5.247	4.93986
chr6	4695305	4710516	uc009avv.1	Peg10	10.7335	10.8543	9.4258	9.48606
chr10	40007264	40023992	uc007ews.2	Amd2	10.2172	9.78987	8.90997	8.76583
chr11	77694116	77709374	uc007khm.2	Pipox	9.13889	9.00548	7.83196	7.9067
chr15	76563886	76650600	uc007wmj.2	Arhgap39	4.384	4.3366	3.07708	3.06539
chr8	66493566	66686790	uc009lut.1	Tll1	4.384	4.14395	3.07708	0.480432
chr3	88487715	88516855	uc008pwg.2	2810403A07Rik	8.96818	8.87963	7.66204	7.86414
chr3	132323461	132348843	uc008rjx.1	Aimp1	9.38048	9.14073	8.07708	8.19468
chr8	11310828	11449287	uc009kvc.2	Col4a2	8.33396	8.73748	7.03127	6.67026
chr4	3828304	3867552	uc008rwp.2	Plag1	4.96271	4.79603	3.66204	0.480432
chr6	120947333	120974306	uc009dny.1	Mical3	6.54767	6.58452	5.247	3.65036
chr8	107776537	107781051	uc009nbx.1	B3gnt9-ps	4.96271	4.92156	3.66204	3.06539
chr17	47746544	47761197	uc008cvr.1	Med20	6.69842	6.622	5.399	5.48043
chr9	65191874	65207450	uc009qdd.1	Pdcd7	8.76827	8.64948	7.46939	7.58896
chr4	86219576	86223187	uc008tlw.2	Rraga	8.62303	8.68532	7.325	7.70925
chr12	106851748	106925451	uc007oyp.1	Atg2b	7.89858	7.50652	6.60064	6.58896
chr8	42482807	42504472	uc012gcs.1	Frg1	8.92939	8.68974	7.63167	7.37525
chr16	18872110	18878730	uc007yop.2	Mrpl40	9.97325	9.78987	8.67699	8.84238
chr8	107819562	107829270	uc009ncl.1	E2f4	10.4176	10.7733	9.12147	9.30698
chr9	88415890	88419725	uc009qys.1	2810026P18Rik	9.48026	9.50401	8.1856	8.26179
chrX	91434047	91459990	uc009ttc.1	Eif2s3x	11.5058	11.4134	10.2115	9.98624
chr6	108013039	108027114	uc009dde.2	Setmar	5.68707	5.50652	4.399	3.80236
chr14	69806748	69812715	uc007umd.1	Nkx3-1	4.36514	4.14395	3.07708	2.48043
chr3	135099443	135130142	uc008rlo.1	Ube2d3	4.36514	4.50652	3.07708	3.06539
chr8	114462617	114476480	uc009nnb.1	Gabarapl2	10.1016	10.0178	8.81854	8.95617
chr6	7625170	7645182	uc009axf.1	Asns	11.173	10.8787	9.89086	9.86629
chr12	70290824	70301416	uc007nrt.1	1110034A24Rik	7.35801	7.07806	6.07708	6.18087
chr9	103263933	103268597	uc009rgs.1	AK048941	6.67946	6.84439	5.399	4.87275
chr14	73907855	73918352	uc007upu.1	Med4	8.4003	8.19458	7.12147	7.26179
chr6	126887983	126925722	uc009dvn.1	D6Wsu163e	5.35562	5.3366	4.07708	3.28779
chr11	100323925	100336096	uc007llj.1	Klhl11	8.21261	8.0231	6.93506	6.54652
chr11	46050401	46127852	uc011xtl.1	Cyfip2	4.93739	4.98045	3.66204	2.48043
chr7	121408063	121421630	uc009jhy.1	Psma1	9.04943	9.06791	7.77752	7.99613
chr9	54796665	54805837	uc009pru.1	Psma4	10.4023	10.0301	9.13236	8.93164
chr13	96120671	96147289	uc007rmi.1	Aggf1	7.15339	7.20696	5.88443	6.15286
chr11	102931609	102964972	uc007ltf.2	Plcd3	4.34603	4.92156	3.07708	3.06539
chr8	108158437	108206822	uc009ndm.2	Ctcf	4.34603	4.58452	3.07708	3.28779
chr19	47804245	47810078	uc008hvk.1	6330577E15Rik	9.98951	9.59869	8.72093	8.55189
chr14	122504303	122558825	uc007vaw.1	Tm9sf2	10.153	9.94946	8.88443	9.08035
chr14	21139080	21169343	uc011zgo.1	Ecd	10.7958	10.716	9.52829	9.73782
chr11	85004811	85050622	uc007krj.1	Appbp2	9.42555	9.07469	8.16454	8.06539
chr4	43968573	43991990	uc008srf.1	Glipr2	9.33759	9.18522	8.07708	8.14577
chr5	65804460	65829081	uc008xns.1	Ugdh	8.24392	8.05084	6.98397	6.83798
chr12	31948158	32014504	uc007nhd.1	Lamb1	9.76107	9.74811	8.50334	8.24198
chr12	4080573	4110612	uc007mxj.2	Dnajc27	7.24134	6.93651	5.98397	5.9067
chr6	71837247	71860756	uc009chs.1	Ptcd3	5.65637	5.38099	4.399	4.28779
chr4	135760279	135802488	uc008vhu.2	Asap3	6.33153	6.40269	5.07708	4.48043
chr12	76731580	76772524	uc007nxj.2	Wdr89	8.13681	7.94393	6.88443	6.78421
chr9	110852048	110886568	uc009rvh.1	Lrrc2	5.91163	5.86016	4.66204	2.48043
chr17	13159664	13187125	uc008als.2	Wtap	7.71527	7.32528	6.46939	5.43463
chr5	115789255	115793561	uc008zds.1	Triap1	7.84514	7.82041	6.60064	6.70925
chr5	125020222	125031066	uc008zqd.1	Eif2b1	10.1281	10.0628	8.88443	9.09146
chr3	79431000	79436741	uc008pnu.2	4930579G24Rik	8.01959	7.81233	6.77752	6.09514
chr2	73148708	73158853	uc008kcl.1	Scrn3	5.64078	5.65852	4.399	3.80236
chr4	133047014	133056465	uc008vcu.1	Trnp1	5.31689	5.42406	4.07708	4.38732
chr8	72285222	72300810	uc009lxq.1	Zfp866	7.31689	7.0231	6.07708	6.12429
chr8	36528318	36560587	uc009lky.2	Eri1	9.80809	9.52642	8.56893	8.32592
chr15	79919763	79943870	uc007wvc.1	Syngr1	6.12284	5.76286	4.88443	4.65036
chr2	52547724	52603183	uc008jre.1	Stam2	7.7078	7.76286	6.46939	6.68989
chr19	7095185	7116516	uc008gke.2	Stip1	12.1807	12.0819	10.9444	10.7842
chr11	107338841	107359350	uc007mar.1	Psmd12	10.1073	9.74811	8.87149	8.4288
chr8	125098536	125102807	uc009ntf.1	Aprt	10.2195	10.3067	8.98397	9.19124
chr9	44550227	44577891	uc009pei.1	Arcn1	10.1323	9.90455	8.89725	8.97229
chr8	97974636	98014720	uc009mym.2	Csnk2a2	8.44027	8.51152	7.20636	7.46912
chr9	64019193	64026369	uc009qbn.1	Rpl4	13.9245	13.8087	12.6927	12.7206
chr9	98462149	98488794	uc009rdm.1	Copb2	11.3239	11.118	10.0939	10.2286
chr13	23510229	23517735	uc007pto.1	Abt1	9.26124	9.35896	8.03127	8.29421
chr1	136389236	136404461	uc007csc.1	Rabif	9.69936	9.72461	8.46939	8.50834
chr4	148476261	148494759	uc008vvr.1	Dffa	7.62897	7.39188	6.399	6.20835
chr11	69156774	69184928	uc007jpy.1	Chd3	7.39334	7.575	6.16454	6.26179
chr2	132694251	132708598	uc008mnn.1	Lrrn4	7.00596	7.29079	5.77752	5.48043
chr18	80323873	80350221	uc008fsk.1	Adnp2	9.30395	9.32812	8.07708	8.28133
chr7	4491366	4500169	uc009exy.1	Syt5	4.8854	5.38099	3.66204	2.48043
chr1	193175859	193222920	uc007eci.1	Ppp2r5a	10.4072	10.2465	9.1856	9.37828
chr1	158583747	158606470	uc007dcn.2	Tor3a	7.20468	6.96595	5.98397	5.68989
chr19	18654853	18708303	uc008gxs.2	Ostf1	8.91244	9.01608	7.69179	7.83798
chr2	90685311	90691777	uc008ktm.1	Mtch2	5.29712	5.69415	4.07708	4.18087
chr4	145052112	145057864	uc008vrx.1	Vmn2r-ps14	5.29712	5.42406	4.07708	0.480432
chr5	100852670	100860554	uc008yhm.2	5430416N02Rik	7.93899	7.92905	6.72093	6.83798
chr6	85399498	85418471	uc009cpv.2	Cct7	13.3452	13.2098	12.1283	12.3247
chr3	87732235	87744608	uc008ptj.1	Isg20l2	10.7029	10.5103	9.48647	9.60971
chr11	51431274	51437216	uc007iuc.1	Nhp2	11.9759	12.0898	10.7601	11.0312
chr4	125166074	125391417	uc008usa.2	Grik3	8.09878	8.2966	6.88443	6.72836
chr16	4039976	4079810	uc007xzk.1	Trap1	11.4452	11.4503	10.2319	10.5559
chr13	38063269	38088059	uc011yyk.1	Ssr1	9.97481	9.622	8.76358	8.57846
chr2	61547750	61638433	uc008jvc.1	Psmd14	10.0564	9.74386	8.84526	8.85981
chr10	94953310	94966572	uc007gwl.1	Mrpl42	5.28714	5.09148	4.07708	3.28779
chr3	89223542	89233951	uc008pzn.2	Shc1	6.74657	6.71164	5.53651	5.72836
chr11	77996560	77998615	uc011yah.1	Snord42b	5.28714	5.89118	4.07708	4.38732
chr18	82642514	82728095	uc008ftr.1	Mbp	4.28714	4.92156	3.07708	2.80236
chr5	138053732	138068306	uc009adc.1	Fbxo24	4.8721	4.58452	3.66204	2.80236
chr2	127411161	127429722	uc008mfu.1	Mrps5	9.14235	9.06791	7.93506	7.95617
chr1	9932105	9936199	uc007aha.1	Snhg6	8.89776	8.94393	7.69179	7.84675
chr9	35016787	35024588	uc009osy.1	Srpr	10.3049	10.3295	9.09944	9.36001
chr5	36805833	36816726	uc008xep.1	Grpel1	10.7484	10.6619	9.54468	9.72361
chr19	45822223	45826053	uc008hrk.1	Npm3	10.3248	10.1821	9.12147	9.14221
chr13	114382386	114410772	uc007rxg.2	Snx18	9.61706	9.64266	8.41693	8.5028
chr4	94231829	94271938	uc008tsd.1	Plaa	6.86205	6.77954	5.66204	5.00399
chr16	57168976	57233579	uc007znb.1	Tbc1d23	7.083	7.07806	5.88443	5.72836
chr17	12875271	12964572	uc008aky.1	Igf2r	10.3622	10.3422	9.16454	9.12429
chr19	3765420	3808829	uc008fwz.2	Suv420h1	5.85868	5.69415	4.66204	4.48043
chr6	72791107	72851973	uc009cjd.1	Kcmf1	9.6486	9.50652	8.45212	8.54652
chr17	33945467	33959859	uc008bzq.1	Kank3	6.97208	7.24349	5.77752	5.83798
chr17	17509295	17531863	uc008ape.2	Riok2	5.59295	5.69415	4.399	3.65036
chr1	155745074	155756844	uc007daq.1	Glul	12.3327	12.4389	11.1405	11.4361
chr2	84516558	84528372	uc008kiy.2	Med19	9.17588	8.97684	7.98397	7.65036
chr17	3519255	3559713	uc008aes.1	Tfb1m	7.35562	7.26733	6.16454	5.93986
chr8	48616998	48638191	uc009lre.2	Rwdd4a	7.35562	7.49647	6.16454	5.87275
chr10	69557868	69655948	uc011xfv.1	Ccdc6	9.43802	9.35896	8.247	8.30698
chr11	60589026	60594569	uc011xvr.1	Smcr8	4.26696	4.42406	3.07708	2.06539
chr6	125079900	125094771	uc009dtn.2	Nop2	11.9029	12.0448	10.7137	10.9572
chr15	81195473	81232124	uc007wwl.1	St13	11.2029	11.0465	10.0137	9.89828
chr1	87959193	88035870	uc007buy.1	Psmd1	10.8564	10.6597	9.66953	9.70443
chr19	10678114	10704311	uc008gqm.1	Ddb1	14.2686	14.2231	13.0841	13.3294
chr18	63135569	63159104	uc008fdp.1	Napg	8.0685	8.24949	6.88443	7.12429
chr2	16275948	16673742	uc008ikz.1	Plxdc2	6.4301	6.21924	5.247	5.33841
chr9	26835759	26902900	uc009oqh.2	Ncapd3	9.01279	8.8042	7.83196	7.88131
chr3	102536692	102576215	uc008qrw.1	Tspan2	5.25677	5.29079	4.07708	3.48043
chr8	87430522	87435360	uc009moa.1	Dnase2a	7.90021	7.95865	6.72093	6.48043
chr9	46079146	46090725	uc009phh.1	Zfp259	10.1503	10.1536	8.97189	9.02733
chr3	87708242	87720054	uc008ptc.2	Hdgf	13.0678	13.0741	11.8909	11.9602
chr1	172634587	172799902	uc007dmj.1	Atf6	9.18398	8.96959	8.00781	7.61998
chrX	160388317	160398598	uc009uva.2	Zrsr2	6.05973	5.92156	4.88443	4.56789
chr8	116961551	116977718	uc009noc.2	Wwox	4.2465	4.58452	3.07708	3.06539
chr12	86627540	86640308	uc007ogw.2	Fam164c	4.83146	5.29079	3.66204	2.48043
chr4	131862592	131866937	uc008vaz.1	Snhg12	4.83146	5.19458	3.66204	3.06539
chr7	147309583	147320233	uc009khb.1	Paox	6.83146	6.99481	5.66204	5.72836
chr10	23504989	23509015	uc007epw.2	Rps12	8.67085	8.56541	7.50334	7.52483
chr18	46892070	46903233	uc008evu.1	Atg12	8.82888	8.74174	7.66204	7.65036
chr19	4195197	4203603	uc008fzh.1	Rad9	8.05091	8.05084	6.88443	6.87275
chr17	7159313	7167505	uc008aia.1	Tagap1	6.82802	6.95131	5.66204	5.87275
chr7	13607500	13616381	uc009ffb.2	Trim28	14.3281	14.4793	13.1625	13.2642
chr8	109672560	109711370	uc009nhg.1	Cyb5b	7.14788	7.27911	5.98397	5.56789
chr13	93122737	93159008	uc007rkl.1	Dhfr	8.667	8.38645	7.50334	7.43463
chr18	85018805	85049255	uc008fuw.1	Cyb5	9.85489	10.0231	8.69179	8.40524
chr11	103226405	103275978	uc007lug.1	Plekhm1	9.14443	9.42406	7.98397	7.95617
chr11	100179309	100183410	uc007lkv.1	Eif1	10.258	10.2023	9.09944	9.19124
chr1	79770592	79778020	uc007bqy.1	Mrpl44	8.40262	8.23746	7.247	6.92338
chr2	150760254	150837134	uc008mut.2	Ninl	7.81766	7.94393	6.66204	6.68989
chr9	55935782	55976697	uc009psv.2	Pstpip1	5.55184	5.72891	4.399	4.18087
chr15	101095276	101105225	uc007xsv.2	Nr4a1	8.84429	9.25844	7.69179	7.6801
chr12	4885837	4916326	uc007myr.1	Ubxn2a	6.81418	6.622	5.66204	4.80236
chr2	154885047	154902233	uc008nka.2	Ahcy	12.6378	12.6859	11.4886	11.6911
chr15	101052637	101063187	uc007xsu.1	Grasp	8.13263	8.23746	6.98397	6.93986
chr10	126609481	126619701	uc011xpl.1	Slc26a10	4.22574	4.79603	3.07708	0.480432
chr2	166629080	166723551	uc008nyr.2	Arfgef2	9.49226	9.55576	8.34386	8.25522
chr14	8910826	8924360	uc007seq.2	Rpp14	9.17926	9.10809	8.03127	8.05786
chr7	91038509	91050042	uc009idx.2	Mesdc2	10.0056	9.99481	8.85844	8.88131
chr9	119245105	119251158	uc009sar.1	Myd88	7.2205	7.29079	6.07708	6.23532
chr13	74459702	74489688	uc007rfa.1	Sdha	10.885	10.866	9.74241	9.99021
chr2	22749041	22795779	uc008inq.1	Pdss1	4.80372	4.79603	3.66204	3.28779
chr7	28621602	28641793	uc009fxf.1	Zfp59	6.02411	5.89118	4.88443	4.80236
chr7	129208711	129225713	uc009jog.1	Ubfd1	10.8746	10.8214	9.73529	9.72361
chr19	4790067	4813634	uc008gaw.1	Rbm4b	6.384	6.26733	5.247	5.00399
chr11	70037628	70045300	uc007juc.2	Bcl6b	7.38166	7.47615	6.247	6.38732
chr2	29723013	29738360	uc008jai.1	Cercam	6.37931	6.29079	5.247	4.56789
chr12	88605677	88614902	uc007oit.1	Ahsa1	11.5909	11.6529	10.4608	10.5705
chr4	148702524	148802740	uc012dpr.1	Ube4b	9.87918	9.72676	8.7495	8.79784
chr11	20099604	20126859	uc007icv.1	Rab1	9.61507	9.43726	8.48647	8.25522
chr19	9001871	9005846	uc008goc.2	Rom1	5.20468	5.03704	4.07708	2.80236
chr9	20818403	20825448	uc009ojw.1	H1f0	4.20468	4.58452	3.07708	1.48043
chr16	31946631	31958558	uc007yxz.2	Ncbp2	8.81852	8.80827	7.69179	7.49166
chr9	77600616	77641458	uc009qtm.1	Gclc	9.10945	9.0405	7.98397	7.98823
chr5	3583977	3598547	uc008whc.2	C030048B08Rik	5.5181	5.50652	4.399	4.38732
chr1	173273829	173288301	uc007doc.1	Pfdn2	7.78077	7.95865	6.66204	6.52483
chr3	96960699	96980499	uc008qoq.2	Acp6	8.51703	8.55092	7.399	7.55725
chr7	51034423	51040780	uc009gnq.1	Klk10	5.77543	5.54605	4.66204	3.65036
chr17	80428826	80463674	uc008dqk.1	Hnrpll	6.9968	6.95131	5.88443	5.68989
chr11	102887875	102927419	uc007ltd.1	Nmt1	10.8109	10.8103	9.69913	9.66778
chr13	113252277	113297068	uc007rwg.2	Il6st	9.56223	9.46072	8.45212	8.3813
chr4	115455589	115484896	uc008ufj.2	Atpaf1	8.47036	8.26141	7.36248	7.27485
chr19	4709222	4752352	uc008gan.1	Spnb3	8.33759	8.45034	7.247	7.41117
chr8	108382533	108404301	uc009nej.1	Nutf2	12.0343	12.0262	10.9444	10.9419
chr3	36463786	36472918	uc012cov.1	Ccna2	11.2741	11.248	10.1856	10.0766
chr10	62381380	62409242	uc007fjh.1	Slc25a16	7.68897	7.622	6.60064	6.38732
chr2	9836178	9972236	uc008ihl.2	Taf3	6.75021	6.81233	5.66204	5.28779
chr9	54995175	55055336	uc009psb.2	Ube2q2	7.75021	7.69415	6.66204	6.68989
chr6	115549955	115568688	uc009diw.1	Mkrn2	9.16366	9.07806	8.07708	8.17392
chr2	162755243	162762856	uc008nsc.2	Srsf6	11.9857	11.9079	10.9004	10.9622
chr9	75287330	75314239	uc009qsh.1	Leo1	8.40954	8.52147	7.325	7.08034
chr5	144576660	144663586	uc009aku.1	Eif2ak1	9.13402	9.03356	8.05436	8.09514
chr5	147828230	147890148	uc009ant.2	Lnx2	8.61507	8.91403	7.53651	7.37525
chr15	79913280	79915354	uc011zwg.1	Snord43	6.96271	6.95131	5.88443	6.09514
chr3	127510182	127542410	uc008rhp.1	Ap1ar	8.74018	8.64948	7.66204	7.70925
chr9	21077900	21094413	uc012gpc.1	Kri1	8.90919	9.07131	7.83196	7.86414
chr2	168719011	168783087	uc008obj.1	Zfp64	5.73927	5.82845	4.66204	3.93986
chr8	90185708	90485494	uc009mqv.1	Zfp423	8.54348	8.94022	7.46939	7.49166
chr9	65281588	65300861	uc009qdh.2	Mtfmt	7.47257	7.29079	6.399	6.23532
chr5	107535588	107720614	uc008ylz.2	Tgfbr3	5.15064	5.42406	4.07708	3.48043
chr15	7823054	8051209	uc007veg.1	Wdr70	7.7356	7.73748	6.66204	6.67026
chr13	43290887	43401541	uc007qfx.1	Gfod1	7.23616	7.48634	6.16454	6.00399
chr4	129321222	129352011	uc008uxz.2	Kpna6	10.8833	10.794	9.81179	9.80236
chr6	56780052	56829354	uc009cbp.2	Fkbp9	10.7317	10.7481	9.66204	9.75189
chr10	83989049	83998633	uc007gkq.1	Ckap4	10.3024	10.3755	9.23695	9.25192
chr7	117263572	117286813	uc009jey.1	Wee1	9.31074	9.31674	8.247	8.33841
chr11	72972031	72986189	uc007kaa.2	P2rx5	4.13958	4.3366	3.07708	2.48043
chr11	60228646	60258779	uc007jfw.2	4933439F18Rik	7.45929	7.60338	6.399	6.20835
chr8	72564711	72582216	uc009lym.1	Sf4	5.45707	5.38099	4.399	2.48043
chr13	58481406	58488586	uc007qtr.2	2210016F16Rik	8.13263	8.1245	7.07708	6.9067
chr9	108460831	108467897	uc009rqg.1	Impdh2	12.7403	12.6546	11.6863	11.7402
chr18	6934963	7006777	uc008dzp.2	Mkx	5.93739	6.21924	4.88443	4.18087
chr1	182732698	182745734	uc007dwr.1	H3f3a	11.0487	11.2093	9.99594	9.3813
chr4	128668508	128688773	uc008uvu.1	Ak2	9.75882	9.73106	8.70643	8.65536
chr9	108239410	108242673	uc009rpf.2	Gpx1	12.693	12.9022	11.6412	11.7093
chr8	59988639	59994796	uc009lsx.2	Hmgb2	11.2914	11.3153	10.242	10.0522
chr11	51437174	51451398	uc007iud.1	Rmnd5b	9.97013	10.0283	8.92257	9.04267
chr19	41984360	41993155	uc008hml.1	Pgam1	13.416	13.4631	12.3705	12.4878
chr6	71491847	71531568	uc009cgw.1	Vps24	9.14097	9.01608	8.09944	8.08776
chr4	153338557	153351190	uc008wav.2	Dffb	7.70218	7.83644	6.66204	6.18087
chr6	125174229	125183878	uc009dua.1	Tapbpl	5.70218	6.11796	4.66204	4.48043
chr13	12656149	12701795	uc007pls.1	Ero1lb	4.11722	4.42406	3.07708	2.48043
chr15	73525036	73539935	uc007wci.1	Gpr20	4.11722	4.24349	3.07708	0.480432
chr15	82727509	82736246	uc007wzq.1	AK080278	4.11722	4.14395	3.07708	2.80236
chr13	49775498	49829636	uc007qjv.2	Iars	10.3556	10.3478	9.31548	9.00791
chr5	108695915	108709540	uc008ynt.1	Dr1	8.60706	8.87187	7.56893	7.56789
chr3	52070258	52154031	uc008pei.2	Foxo1	8.24392	8.43463	7.20636	7.05029
chr4	59200421	59235705	uc008szs.1	Ugcg	7.86541	7.82845	6.83196	6.67026
chr7	35695425	35829727	uc009gjj.2	Pepd	8.99296	8.98405	7.95972	7.88982
chr6	128380124	128390649	uc009edr.1	Fkbp4	13.0377	13.195	12.0049	12.144
chr7	129066352	129127207	uc009jnz.1	Cog7	8.23745	8.35896	7.20636	7.32592
chr2	14974988	15000818	uc008iky.1	Arl5b	7.35562	7.51651	6.325	5.48043
chr7	16912402	16975134	uc009fhr.1	Sae1	10.3625	10.2284	9.33446	9.25522
chr11	40545143	40553549	uc007ily.1	Nudcd2	9.68897	9.65852	8.66204	8.46912
chr4	123580255	123589493	uc008uql.1	Mycbp	6.68707	6.93651	5.66204	4.18087
chr5	130730906	130817437	uc008zul.2	Tyw1	9.00748	9.0474	7.98397	8.00399
chr10	127947305	127964915	uc007hng.1	Esyt1	7.421	7.76286	6.399	5.65036
chr9	123020348	123045247	uc009sfv.1	Exosc7	9.12144	9.13426	8.09944	8.13864
chr4	132382839	132401084	uc008vbw.2	Ppp1r8	10.9985	11.1097	9.97794	10.1404
chr11	115883274	115887818	uc007mjo.1	H3f3b	12.7004	12.7986	11.6826	11.656
chr4	101388011	101486272	uc008tvy.2	Lepr	5.0945	4.98045	4.07708	2.48043
chr10	17441033	17445480	uc007elt.2	Cited2	4.0945	4.42406	3.07708	3.06539
chr11	95908749	95928678	uc007lbd.1	Ube2z	10.9647	10.9768	9.94744	9.97229
chr7	17364694	17383623	uc009fib.1	Slc1a5	8.70593	8.72461	7.69179	7.75656
chr6	47746139	47765511	uc009btf.1	Pdia4	11.5943	11.532	10.5849	10.6491
chr18	56865466	56913079	uc012bdd.1	Lmnb1	11.1664	11.2031	10.1592	10.1134
chr12	77898949	77925511	uc007nyt.2	Rab15	7.33153	7.575	6.325	6.23532
chr8	107113367	107120749	uc009naw.1	Pdp2	7.9358	8.34222	6.93506	7.01959
chr17	36972085	36996325	uc008clh.1	Trim26	8.28212	8.35896	7.28653	7.3993
chr17	36093763	36108695	uc008cjk.1	Abcf1	10.9112	10.9705	9.91628	10.0118
chr5	28528985	28574328	uc008wtw.1	Cnpy1	4.07141	4.65852	3.07708	2.06539
chr7	134003485	134008636	uc012ftw.1	Hirip3	8.27835	8.25546	7.28653	7.09514
chr15	72932054	73017377	uc007wbu.2	Eif2c2	10.2083	10.3267	9.21663	9.27809
chr6	125410283	125446773	uc009dun.1	Cd9	10.2771	10.3548	9.28653	9.35388
chr4	118949931	118969118	uc008ulu.1	Ybx1	13.1518	13.3919	12.1659	12.1324
chr9	75345590	75409464	uc009qsi.1	Tmod3	8.27203	8.37002	7.28653	7.3508
chr13	97156248	97185542	uc007rmw.2	Poc5	7.45484	7.41341	6.46939	6.52483
chr2	127066673	127075552	uc008mfb.2	Ciao1	9.80153	9.91024	8.81854	8.85547
chr16	16981474	17039133	uc007yjq.1	Mapk1	5.86541	5.76286	4.88443	3.06539
chr2	174290591	174300442	uc008ofg.1	Slmo2	9.72962	9.86407	8.7495	8.81582
chr3	96398558	96403701	uc008qng.1	Ankrd34a	5.64078	6.19458	4.66204	3.48043
chr7	85920226	85929975	uc009hxl.1	Mrpl46	8.72177	8.77954	7.7495	7.79331
chr1	180334011	180413380	uc007dve.1	Efcab2	4.04795	4.42406	3.07708	2.48043
chr5	35898857	35919719	uc008xdu.2	2310079F23Rik	7.80021	7.92156	6.83196	6.74722
chr1	93270437	93297360	uc007cak.1	Ilkap	5.36514	5.38099	4.399	3.93986
chr5	114220820	114227807	uc008yyo.1	Iscu	6.20997	6.3366	5.247	4.93986
chr1	138110107	138132841	uc007cuo.1	5730559C18Rik	7.12564	7.14395	6.16454	6.15286
chr13	101419297	101436368	uc007rrg.2	Taf9	8.12424	8.07806	7.16454	6.68989
chr4	155334426	155340738	uc008wfp.1	Fam132a	5.35562	5.92156	4.399	3.65036
chr14	65566881	65658663	uc007uiw.1	Ints9	7.42328	7.47615	6.46939	6.15286
chr11	22870028	22874908	uc007iem.1	Zrsr1	6.93739	6.98045	5.98397	5.80236
chr9	72653080	72765114	uc009qqh.1	Prtg	7.11722	7.21924	6.16454	6.00399
chr2	26242867	26252641	uc008ive.1	Pmpca	10.0286	9.97684	9.07708	9.05408
chr15	51794149	51825306	uc007vrd.2	Rad21	11.002	10.9957	10.0544	9.8877
chr6	125312668	125332522	uc009dum.1	Plekhg6	4.02411	4.79603	3.07708	0.480432
chr12	88774206	88786789	uc007ojb.1	Alkbh1	4.60907	4.58452	3.66204	2.80236
chr2	148520392	148560156	uc008mti.1	Napb	4.60907	4.65852	3.66204	3.65036
chr15	81871774	81880028	uc007wya.1	Nhp2l1	11.8677	11.8616	10.9319	10.9622
chr11	95526270	95542087	uc007lan.2	Phb	12.0654	12.1363	11.1324	11.1502
chr8	128191717	128197265	uc009nyi.2	4933403G14Rik	6.33153	6.52642	5.399	5.28779
chr10	127646965	127650850	uc007hlq.1	Spryd4	8.76377	8.83245	7.83196	7.76583
chr15	10413803	10423437	uc007vgi.1	Rad1	4.59295	4.72891	3.66204	1.48043
chr2	30698886	30736767	uc008jcy.2	Prrx2	5.59295	5.76286	4.66204	4.56789
chr7	30618638	30640667	uc009gcf.1	BC027344	4.59295	4.58452	3.66204	2.80236
chr10	5987069	6082212	uc007ehi.2	Akap12	6.46594	6.92156	5.53651	5.28779
chr9	64025103	64030495	uc009qbo.1	Snapc5	6.70218	6.96595	5.77752	5.48043
chr17	53616558	53647003	uc008czn.1	Rab5a	8.58584	8.53135	7.66204	7.54652
chr14	52693054	52725703	uc007toh.2	Hnrnpc	6.32179	6.54605	5.399	5.33841
chr12	88507191	88543179	uc007oin.1	Tmed8	8.42555	8.52147	7.50334	7.18087
chr9	122830195	122840146	uc009sfi.1	Zfp105	7.08588	7.0231	6.16454	6.09514
chr16	58668320	58680502	uc007zoa.2	Cpox	7.24392	7.622	6.325	6.06539
chr11	106115498	106124426	uc007lyn.1	Psmc5	11.2387	11.2813	10.3203	10.3322
chr1	95214404	95242042	uc007cdu.1	Pask	4.57665	5.3366	3.66204	3.48043
chr10	12101985	12583533	uc007ejw.1	Utrn	6.69086	6.71164	5.77752	5.23532
chr1	129691147	129701414	uc007clb.1	Ccnt2	4.98758	5.03704	4.07708	3.48043
chr11	116711210	116716408	uc007mmn.2	Srsf2	8.44589	9.7332	7.53651	6.45771
chr2	26809082	26821906	uc008iwn.1	Rexo4	9.37872	9.49394	8.46939	8.39929
chr18	36917892	36923362	uc008eol.1	Wdr55	10.0271	10.1163	9.12147	9.03118
chr4	94166769	94225487	uc008tsa.2	5830433M19Rik	5.9814	6.52642	5.07708	3.06539
chr8	123105165	123114975	uc009nrd.1	Gins2	9.35562	9.4214	8.45212	8.49166
chr1	133047783	133076979	uc007cnb.2	Eif2d	4.56016	5.03704	3.66204	3.48043
chr14	121685562	121780452	uc007vac.1	Stk24	9.72593	9.68532	8.83196	8.77964
chrX	155808126	155823631	uc009usl.1	Eif1ax	10.1023	10.0797	9.21663	9.08035
chr2	166838812	166851307	uc008nza.1	Ddx27	6.28212	6.58452	5.399	4.72836
chr2	28978511	28986671	uc008izl.1	Setx	4.54348	4.72891	3.66204	3.06539
chr1	9533488	9537536	uc007agk.2	Rrs1	10.1179	10.1821	9.23695	9.21514
chr13	12279085	12352267	uc007plh.1	Mtr	5.27709	5.69415	4.399	3.93986
chr9	20770395	20783237	uc009ojt.2	S1pr2	9.97091	10.1631	9.09944	9.09146
chr2	72930857	73054504	uc008kcg.1	Ola1	8.07141	8.0577	7.20636	7.16693
chr7	152099098	152107042	uc009kqs.1	Oraov1	6.11157	6.14395	5.247	5.23532
chr17	31192638	31254926	uc008buj.2	Abcg1	5.74657	5.79603	4.88443	4.80236
chr3	34546926	34551382	uc008oxu.1	Sox2	11.1698	11.4327	10.3107	10.2168
chr8	127419785	127427713	uc009nxx.2	Gm505	7.97675	8.07131	7.12147	7.00399
chr5	138068350	138084130	uc009adg.2	Lrch4	7.78964	8.31959	6.93506	6.45771
