# Supplementary material for: YY1 and CTCF orchestrate a 3D chromatin looping switch during early neural lineage commitment
Source: HighWire-hosted journal article supplement (doi:10.1101/gr.215160.116), 2017-05-23
Supplement: Supplemental_Table_S17.xlsx [file Supplemental_Table_S17.xlsx]

## Sheet: NPC_Genes_1_8foldUpwAC_JB_2_9_1
Beagan et al. 2017
Table S17, NPC Gene Annotations
#chr	start_pos	end_pos	gene_ID	gene_name	ES_Serum_Rep1	ES_Serum_Rep2	pNPC_Rep1	pNPC_Rep2
chr7	51695856	51718714	uc009gpj.1	Lrrc4b	0.924571	2.65852	12.774	12.9135
chr2	27044901	27104332	uc008ixg.1	Sardh	-1.88278	1.3366	9.06576	9.291
chr6	36665662	36763361	uc009bja.1	Ptn	0.924571	1.3366	11.0019	11.0654
chr9	54452803	54511692	uc009prj.1	Acsbg1	2.57665	3.14395	12.3059	12.5589
chr9	37173190	37194156	uc009our.1	Hepacam	0.439144	1.3366	10.0827	10.1493
chr6	114079234	114199880	uc009dhs.1	Slc6a11	0.439144	0.336596	10.0078	10.3165
chr10	84216792	84369283	uc007gkv.1	Rfx4	-0.882784	0.336596	8.48647	8.49166
chr5	139897132	139903754	uc009agr.2	Gpr30	-1.88278	0.336596	7.46939	7.37525
chr1	93074398	93121773	uc007bzx.2	Ramp1	-0.297822	2.3366	8.89725	9.30061
chr18	58168276	58371580	uc008ezn.1	Fbn2	1.81766	3.14395	10.5117	10.5745
chrX	45378322	45390029	uc009tbu.1	Apln	3.8721	4.14395	12.4214	12.3888
chr3	87791452	87806278	uc008pto.2	Bcan	1.43914	2.3366	9.97189	10.4185
chr1	42751990	42757054	uc007auw.1	Pou3f3	1.70218	2.3366	10.2064	10.4705
chr9	20472429	20534658	uc009oje.1	Olfm2	3.43914	3.3366	11.9257	11.9713
chr2	84170782	84267423	uc008kii.2	Calcrl	-0.882784	0.336596	7.60064	7.36307
chr6	21164108	21679805	uc009baq.1	Kcnd2	-1.88278	0.336596	6.60064	7.37525
chr6	107477778	107520204	uc009ddd.1	Lrrn1	0.702178	1.92156	8.89725	8.60455
chr9	49323243	49609174	uc009pjh.1	Ncam1	-0.297822	1.3366	7.69179	7.56789
chr9	27596853	28732633	uc009oqr.1	Opcml	-1.88278	1.3366	5.98397	5.23532
chr16	91268013	91272184	uc007zxf.1	Olig1	6.36039	6.60338	14.1807	14.4055
chr1	106663395	106892058	uc007cgc.1	Cdh20	0.702178	1.92156	8.50334	8.52483
chr8	97874236	97898193	uc009myh.1	Mmp15	5.78255	6.19458	13.5426	13.7236
chr6	88792551	88826038	uc009cvu.2	Podxl2	2.02411	2.65852	9.69913	9.74487
chr2	93795966	93799257	uc012bzx.1	Gm13889	1.57665	2.3366	9.247	9.291
chrX	19634695	19674646	uc009sss.1	Chst7	3.28714	4.3366	10.8519	11.0942
chr7	100226388	100230231	uc009iim.1	Fam181b	4.54348	4.58452	12.0063	12.085
chr7	112901502	112938064	uc009izh.2	Dchs1	2.57665	3.79603	9.98397	10.0988
chr11	119400032	119411134	uc007mqv.1	Nptx1	3.54348	4.24349	10.8084	10.876
chr18	5601741	5642871	uc008dza.1	AK041408	0.117216	2.3366	7.325	6.82028
chr7	120907511	121186889	uc009jhv.2	Spon1	2.11722	2.3366	9.325	9.48325
chrX	71000398	71017849	uc009tmn.2	Plxnb3	1.43914	1.3366	8.53651	8.48606
chr17	25702837	25709631	uc008bay.1	Sox8	3.76107	3.3366	10.8152	11.0663
chr6	120438956	120445825	uc009dnk.1	Cecr6	0.117216	0.336596	7.16454	6.52483
chr7	116282085	116315822	uc009jdk.1	Lmo1	2.36514	2.3366	9.3532	9.78193
chr6	53765461	53772819	uc009bzk.2	Tril	3.2465	3.79603	10.1856	10.2066
chr5	125481844	125492917	uc008zqt.1	Fam101a	2.20468	1.3366	9.13236	9.41707
chr10	115854923	115912579	uc007hbw.1	Kcnmb4	0.702178	2.3366	7.43463	7.99613
chr9	15714636	16184675	uc009ogj.1	Fat3	0.702178	2.3366	7.43463	6.65036
chr13	9875858	10362049	uc007plb.1	Chrm3	1.43914	1.3366	8.16454	8.49166
chr16	97576334	97660619	uc008ade.2	Bace2	0.924571	0.336596	7.60064	7.5028
chr12	73312738	73511926	uc007nvk.1	Rtn1	2.76107	2.65852	9.399	9.45771
chr3	106837079	106841047	uc008qwp.2	Kcna3	-0.297822	1.3366	6.325	5.38732
chr1	137056826	137066258	uc007csv.2	Gpr37l1	0.117216	0.336596	6.72093	6.63018
chr5	141081294	141091499	uc009ahu.1	Lfng	2.36514	3.14395	8.94744	9.3813
chr4	46676769	47006586	uc008sug.1	Gabbr2	0.924571	2.3366	7.43463	8.04267
chr7	129430638	129777915	uc009jou.1	Prkcb	2.81766	1.92156	9.325	9.44333
chrX	100892752	101019327	uc009tzy.1	Slc16a2	3.76107	4.72891	10.2319	10.0841
chr18	43691061	43849427	uc008euk.2	Jakmip2	-0.297822	1.3366	6.16454	5.83798
chr2	79093582	79173271	uc008kgr.1	Itga4	0.439144	1.92156	6.88443	6.52483
chr2	180757015	180775882	uc008okq.1	Chrna4	2.57665	3.50652	8.97189	9.17043
chr13	78328235	78340243	uc007rhe.1	Nr2f1	1.11722	2.65852	7.50334	7.59937
chr11	107653179	107657296	uc007mba.1	AK048292	-0.882784	0.336596	5.399	4.06539
chr5	135724807	135728917	uc008zya.2	Fzd9	4.421	4.98045	10.662	10.7899
chr13	54470712	54485278	uc007qoc.1	Cplx2	1.70218	2.65852	7.90997	7.83798
chr17	44323520	44417117	uc008cpw.1	Clic5	2.11722	0.336596	8.325	8.21514
chr4	109333480	109341262	uc008ucs.1	Cdkn2c	2.57665	3.92156	8.76358	8.98426
chr13	34271026	34439051	uc007qbh.1	Slc22a23	0.702178	2.3366	6.88443	7.15286
chr1	186551023	186558372	uc007dyn.2	Hlx	1.11722	2.3366	7.28653	7.26179
chr13	60275765	60280896	uc007qvi.2	Gas1	4.32667	4.65852	10.4907	10.5262
chr15	100405748	100432415	uc007xrr.1	Pou6f1	0.117216	0.336596	6.247	6.06539
chr8	72616983	72646743	uc009lys.2	Ncan	6.94376	6.92156	13.0643	13.1992
chr7	104561466	104568020	uc009ije.1	Thrsp	2.64078	3.14395	8.7495	8.85547
chr16	21649117	21696738	uc007yrl.2	2510009E07Rik	1.81766	3.50652	7.90997	7.9067
chr8	23866215	23893320	uc009ldx.2	Plat	4.64078	4.03704	10.6918	10.7519
chr3	54700990	54721809	uc008pfx.2	6030405A18Rik	1.11722	0.336596	7.16454	7.72836
chrX	108007803	108010889	uc009ucv.1	Pou3f4	1.11722	1.3366	7.16454	6.98823
chr17	23873152	23879297	uc008atb.1	Paqr4	4.92457	4.72891	10.9413	10.9882
chr11	94869192	94887401	uc007kzt.1	Samd14	2.28714	2.65852	8.2669	8.35695
chrX	58144540	58148605	uc009vff.1	Sox3	4.16161	5.19458	10.1378	10.2253
chr15	81765188	81781371	uc007wxs.2	Csdc2	2.70218	3.65852	8.67699	8.63018
chr6	53987925	54251806	uc009bzo.2	Chn2	2.36514	2.3366	8.325	8.13148
chr16	20693129	20703109	uc007yqx.1	Fam131a	3.81766	3.79603	9.72813	9.58896
chr11	107596093	107657778	uc007maz.1	Cacng4	0.702178	1.92156	6.60064	6.98823
chr1	134774931	134836582	uc007cpi.2	Lrrn2	2.11722	3.14395	8.00781	8.02733
chr5	30429735	30444920	uc012dtz.1	Fam59b	5.55184	5.58452	11.4192	11.4599
chr13	83870173	83875274	uc007rim.1	C130071C03Rik	0.117216	1.92156	5.98397	6.28779
chr5	36359829	36742788	uc008xek.1	Sorcs2	4.13958	3.92156	9.98997	10.2134
chr2	179175182	179634080	uc008ohv.2	Cdh4	4.76107	4.58452	10.6006	10.5546
chr10	26490317	26638454	uc007ese.1	Arhgap18	2.76107	2.3366	8.56893	8.52483
chr4	128559383	128588570	uc008uvo.1	Trim62	3.20468	2.92156	8.97189	8.83798
chr16	91223794	91228922	uc007zxe.1	Olig2	7.23356	7.39188	12.9787	13.148
chr18	37964063	38001526	uc008ere.1	Pcdhgc3	5.27709	5.50652	11.0108	11.2675
chr8	97294079	97306326	uc009mwx.1	Cx3cl1	4.96271	5.14395	10.6918	10.9109
chr15	78671076	78681332	uc007wrl.1	Cdc42ep1	5.53507	5.72891	11.2595	11.2829
chr8	120805654	121847348	uc009npl.1	Cdh13	2.81766	3.79603	8.53651	8.69475
chr7	71900981	72303414	uc009hgl.2	Fam189a1	1.81766	1.3366	7.46939	7.45771
chr5	53498321	53606691	uc008xlc.1	Sel1l3	2.8721	2.92156	8.52002	8.51385
chr6	91313976	91363363	uc009cxz.1	Wnt7a	3.47477	3.3366	9.1105	9.53571
chr7	141074882	141418780	uc009kdp.1	Adam12	2.70218	2.3366	8.325	8.69475
chr1	122981981	123017533	uc007cjn.1	AK138346	0.439144	0.336596	5.98397	5.56789
chr18	84887633	84909828	uc008fuv.1	Fam69c	-0.882784	0.336596	4.66204	4.56789
chr9	94568310	95130871	uc009ray.2	Slc9a9	0.117216	1.92156	5.66204	4.93986
chr19	6416764	6533215	uc008giu.1	Nrxn2	0.702178	1.3366	6.247	7.05029
chr7	89482203	89762958	uc009ida.2	Adamtsl3	1.57665	2.3366	7.12147	7.52483
chr4	128450328	128485356	uc008uvn.1	Zfp362	3.16161	3.92156	8.70643	8.66531
chr8	125639273	125659085	uc009nuf.1	Cpne7	2.81766	2.92156	8.36248	8.48043
chr13	105737232	105847010	uc007rtp.1	Rgs7bp	0.924571	1.3366	6.46939	6.70925
chr9	95301344	95309689	uc009raz.2	Chst2	5.34603	5.38099	10.8876	10.9368
chr10	52408306	52831428	uc007fbk.2	Slc35f1	2.43914	2.3366	7.95972	8.03502
chr1	34776768	34869599	uc007apf.1	mKIAA1112	2.36514	3.50652	7.88443	8.22862
chr12	110064087	110076086	uc007pad.1	Slc25a29	2.76107	4.50652	8.247	8.3508
chr4	117505862	117541910	uc008uiy.1	Slc6a9	3.32667	3.3366	8.79132	9.01959
chr1	55460789	55811129	uc007ban.2	Plcl1	0.439144	1.3366	5.88443	5.76583
chr1	191945657	191996559	uc007ebb.1	Prox1	0.439144	2.3366	5.88443	5.18087
chr8	113247625	113265300	uc009nky.1	Mtss1l	0.439144	0.336596	5.88443	6.38732
chr7	17528030	17532427	uc009fio.1	Pnmal2	3.07141	2.92156	8.50334	8.75656
chr1	43785446	43799409	uc007avp.2	1500015O10Rik	2.36514	2.3366	7.77752	7.98028
chr1	173178552	173190053	uc007dnn.1	Adamts4	1.92457	3.3366	7.325	7.03502
chr1	72904638	72923439	uc007bkx.1	Igfbp5	1.81766	1.3366	7.20636	6.87275
chr6	114230628	114262526	uc009dhu.2	Slc6a1	0.702178	1.92156	6.07708	5.87275
chr1	84366413	84694796	uc007bsw.1	Dner	2.57665	2.65852	7.93506	7.43463
chr7	124522492	124811144	uc009jjm.1	Xylt1	3.02411	3.3366	8.34386	8.49166
chr14	55549531	55554673	uc007txn.2	Il25	-0.882784	1.3366	4.399	5.18087
chr14	35631321	36394301	uc007tbj.1	Grid1	1.57665	3.14395	6.83196	6.26179
chr4	130346451	130382233	uc008uzr.1	Sdc3	6.5181	6.84439	11.7706	11.8668
chr11	102057060	102093486	uc007lqw.1	Hdac5	1.28714	3.14395	6.53651	6.00399
chr6	114230628	114257112	uc009dht.2	Slc6a1	1.70218	2.3366	6.93506	7.00399
chr2	33585475	33745466	uc008jib.1	Fam125b	4.34603	4.50652	9.56089	9.72361
chr12	3363131	3406494	uc007mwm.1	Kif3c	1.11722	1.92156	6.325	6.06539
chr11	16650205	16787661	uc007ibn.1	Egfr	-0.297822	2.3366	4.88443	4.93986
chr3	89193785	89202701	uc008pze.1	AK161599	0.702178	0.336596	5.88443	5.38732
chr18	75590870	75859350	uc008fqg.1	Gm672	1.81766	3.50652	6.98397	6.54652
chr1	152409631	152842565	uc007cyj.1	Hmcn1	1.92457	1.3366	7.07708	6.85547
chr16	34783035	35002520	uc007zbd.1	Mylk	0.117216	0.336596	5.247	4.72836
chr17	29225930	29237667	uc012aom.1	Cdkn1a	0.117216	1.3366	5.247	4.72836
chr11	53868429	53884519	uc007ixf.2	Pdlim4	2.70218	2.65852	7.83196	8.28133
chr5	38528431	38552706	uc008xga.1	Nsg1	4.70218	4.50652	9.83196	9.99218
chr9	96843900	96920774	uc009rcx.1	Spsb4	4.9752	5.50652	10.0939	10.0822
chr2	70954110	70980983	uc008kaf.2	Cybrd1	3.57665	3.14395	8.67699	8.49724
chr5	98607887	98616467	uc008ygb.1	Prdm8	0.439144	0.336596	5.53651	4.28779
chr12	112907565	112912549	uc007pdn.2	Ckb	11.428	11.6753	16.5114	16.7778
chr5	124511865	124547807	uc008zou.1	Abcb9	0.702178	1.3366	5.77752	6.76583
chr6	24901140	24908125	uc009bcc.1	Tmem229a	3.50953	3.79603	8.58487	8.58372
chr7	50728276	50747393	uc009gmv.2	Iglon5	2.43914	2.65852	7.50334	7.37525
chr13	46511668	46526468	uc007qhe.1	Rbm24	1.92457	3.3366	6.98397	7.16693
chr7	69606756	69611396	uc009hfj.1	Peg12	4.84514	4.98045	9.87149	10.071
chr6	145880666	145913745	uc009eru.1	Sspn	1.57665	3.3366	6.60064	6.45771
chr17	25931515	25935990	uc008bbz.1	Metrn	3.99986	5.24349	8.99594	9.11343
chr1	79790895	79857240	uc007bqz.2	Serpine2	8.08011	8.03704	13.0565	13.1018
chr12	14154403	14160844	uc007nbn.1	Fam84a	4.59295	5.72891	9.56089	9.56524
chr2	166391844	166541332	uc008nyn.1	Prex1	5.48354	5.65852	10.4478	10.7068
chr17	5490231	5494513	uc008afe.1	AK048886	-0.882784	1.92156	4.07708	4.18087
chr16	20515136	20532593	uc007ypx.1	Dvl3	0.702178	2.3366	5.66204	4.56789
chr15	40484587	40936138	uc007vos.1	Zfpm2	1.81766	2.92156	6.77752	6.00399
chr9	56731041	56744014	uc009ptn.1	Cspg4	0.439144	1.92156	5.399	5.56789
chr7	35985952	36002364	uc009gjp.1	Lrp3	3.99986	5.622	8.94744	9.07662
chr12	88017649	88036631	uc007ohx.2	Vash1	7.1833	6.82845	12.116	12.1938
chr7	71644591	71898762	uc009hgj.2	Apba2	3.84514	4.3366	8.77752	8.96021
chr8	18691336	18743551	uc009kzu.1	Angpt2	3.64078	3.65852	8.56893	8.66034
chr10	39341219	39453773	uc007ewb.1	AK164126	2.02411	0.336596	6.93506	7.24862
chr12	15798532	15825591	uc007nbq.1	Trib2	7.23616	7.29079	12.1418	12.2642
chr6	113118080	113147378	uc009dev.1	Lhfpl4	2.43914	2.3366	7.325	7.32592
chr11	32245810	32328183	uc007ijq.1	Sh3pxd2b	6.47916	6.96595	11.3532	11.3707
chr1	122009856	122019496	uc007cje.1	Dbi	1.11722	2.3366	5.98397	5.23532
chr6	128941037	128956667	uc009eez.2	BC064078	2.57665	2.3366	7.43463	7.32592
chr15	97996236	98000565	uc011zys.1	AI836003	2.9752	3.79603	7.83196	7.82916
chr7	73982620	74297511	uc009hhx.1	Adamts17	0.924571	3.14395	5.77752	5.83798
chr11	98601186	98630320	uc007lhf.1	Thra	3.70218	4.3366	8.55281	8.33218
chr17	25705860	25711979	uc008bbb.1	AK079380	3.2465	3.14395	8.05436	7.70925
chr6	28778125	28783747	uc009bcu.1	Lrrc4	4.2465	4.03704	9.05436	8.71405
chr4	153542821	153649830	uc008wbp.2	Megf6	3.95011	4.24349	8.7495	8.86414
chrX	8775098	8845211	uc009spo.1	Lancl3	1.81766	1.92156	6.60064	6.20835
chr11	87040407	87174496	uc007kto.1	Ppm1e	2.20468	1.92156	6.98397	7.13864
chr5	4753838	4760216	uc008wig.2	Fzd1	5.21525	5.46588	9.95972	10.242
chr17	8563260	8615591	uc012ajs.1	T2	0.924571	1.3366	5.66204	5.06539
chr9	123168174	123171907	uc009sgb.1	Tmem158	3.70218	4.03704	8.41693	8.68989
chr11	102298295	102310977	uc007lrw.1	Fam171a2	5.2465	5.38099	9.95359	10.1964
chr18	5589888	5774909	uc008dyy.1	Zeb1	4.30704	4.14395	9.00781	8.91088
chr10	68672509	68677846	uc007fmn.1	AK044689	-0.297822	1.92156	4.399	4.72836
chrX	66611505	67121212	uc009tjb.1	Aff2	0.702178	1.92156	5.399	5.18087
chr6	85461115	85465536	uc009cpy.1	Egr4	1.70218	1.3366	6.399	6.09514
chr5	34336632	34348565	uc008xbs.1	Nat8l	4.54348	4.92156	9.21663	9.36613
chr7	119457542	119491836	uc009jgp.1	Mical2	1.57665	1.92156	6.247	6.5028
chr4	88939083	89185312	uc008toj.1	AK148321	1.11722	1.3366	5.77752	5.23532
chr11	16650205	16813910	uc007ibo.1	Egfr	4.91163	5.3366	9.56893	9.22862
chr4	109648629	109656289	uc008ucv.1	Dmrta2	3.20468	3.79603	7.85844	8.10979
chr19	41674746	41820346	uc008hmf.2	Slit1	2.64078	1.3366	7.28653	7.3508
chr4	41585176	41589335	uc008sjd.2	Enho	4.57665	4.98045	9.21663	9.31015
chr18	37864882	38001526	uc008eqs.1	Pcdhga6	0.439144	0.336596	5.07708	6.03502
chr5	125517643	125540770	uc008zrb.1	Ncor2	0.439144	0.336596	5.07708	4.72836
chr14	69645345	69659458	uc007ulz.1	Stc1	2.20468	2.92156	6.83196	6.23532
chr17	34056239	34059430	uc008cad.1	AK140218	2.50953	3.50652	7.12147	7.18087
chr4	62160087	62165234	uc008tey.1	Hdhd3	2.81766	3.50652	7.399	7.2219
chr4	70092960	70197962	uc008tib.1	Megf9	3.02411	3.3366	7.60064	7.13864
chr1	59571107	59691353	uc007bdv.1	Gm973	0.117216	2.3366	4.66204	4.38732
chr6	83085077	83102573	uc009cmu.2	Rtkn	0.117216	0.336596	4.66204	5.12429
chr9	119392528	119490134	uc009sbc.1	Scn5a	0.702178	1.92156	5.247	5.23532
chr8	96332737	96484594	uc009mvk.2	Gnao1	2.57665	2.65852	7.12147	6.72836
chr17	26549909	26583287	uc008bed.2	Neurl1b	3.60907	3.79603	8.14317	8.6996
chr5	91566640	91577458	uc008ybt.1	Areg	2.64078	2.65852	7.16454	7.01959
chr6	38611068	38630864	uc012ekf.1	Clec2l	1.57665	1.3366	6.07708	5.76583
chr7	134950357	134970045	uc009jwx.1	Stx1b	2.43914	3.14395	6.93506	6.80236
chr6	115904828	115947023	uc009djn.1	Plxnd1	3.70218	4.14395	8.1856	8.31964
chr13	111183255	111188094	uc007rvr.1	Plk2	3.57665	2.3366	8.05436	7.37525
chr16	20619287	20623351	uc007yqk.2	Camk2n2	1.92457	4.3366	6.399	6.26179
chr17	25927450	25931329	uc008bby.1	Fam173a	0.924571	1.3366	5.399	5.23532
chr16	42248673	42342764	uc007zfv.1	Gap43	6.20997	6.21924	10.6733	10.5344
chr10	39449965	39595011	uc007ewd.1	Rev3l	3.28714	3.50652	7.7495	7.13864
chr17	73265644	73291286	uc008dng.2	Lbh	6.23096	6.44512	10.6918	10.6097
chr13	48897118	48968254	uc007qin.2	Phf2	0.439144	1.92156	4.88443	5.28779
chr18	81163112	81185317	uc008ftn.1	Sall3	0.439144	1.3366	4.88443	5.65036
chr6	114870071	114873834	uc009dii.1	AK078466	0.439144	1.3366	4.88443	4.18087
chr12	107136050	107140231	uc007oza.1	AK043332	2.02411	3.50652	6.46939	7.08034
chr17	24665998	24672692	uc008awu.2	Rab26	4.34603	4.24349	8.77752	9.01181
chr14	55535379	55547625	uc007txm.2	Efs	7.421	8.19458	11.8403	11.8609
chr18	37972732	38001526	uc008erf.1	Pcdhgc4	3.11722	1.3366	7.53651	7.98823
chr9	31653628	31722870	uc009oru.1	Barx2	1.57665	2.3366	5.98397	6.03502
chr2	172695188	172767794	uc008odb.1	Bmp7	3.64078	4.42406	8.03127	8.04267
chr7	106528058	106609494	uc009ilo.1	Gdpd5	3.47477	4.14395	7.85844	8.11706
chr18	37977199	38001526	uc008erg.1	Pcdhgc5	2.70218	3.14395	7.07708	7.71884
chr18	35018860	35024610	uc008elt.1	Egr1	6.43914	6.90645	10.8084	10.5384
chr11	7106095	7115926	uc007hzi.1	Igfbp3	9.17453	9.14717	13.5416	13.7303
chr13	69841709	69880775	uc007rcp.2	Ube2ql1	4.20468	4.14395	8.56893	8.58372
chr11	98900573	98913957	uc007lie.1	Igfbp4	7.78433	7.86016	12.1445	12.237
chr10	93101793	93208717	uc007gux.2	Ntn4	4.02411	3.65852	8.38086	8.65036
chr13	97692643	97720869	uc007rno.2	Gcnt4	2.20468	1.3366	6.53651	6.06539
chr5	121130272	121163678	uc008zhu.1	Dtx1	2.50953	3.79603	6.83196	6.26179
chr10	127097973	127105759	uc011xpt.1	Nab2	0.924571	0.336596	5.247	4.48043
chr19	56794861	56799352	uc008hze.2	Adrb1	3.32667	3.14395	7.63167	7.97228
chr11	115241229	115257446	uc007mhi.1	Cdr2l	7.45037	7.61272	11.753	11.9966
chr18	37919454	38001526	uc008erc.2	Pcdhgb8	3.02411	2.65852	7.325	7.26179
chr17	24684894	24733459	uc008awv.1	Pkd1	3.43914	4.14395	7.72093	8.2219
chr3	50168857	50249535	uc008pdi.1	Slc7a11	0.117216	0.336596	4.399	4.28779
chr3	86595362	86726806	uc008prq.3	Dclk2	0.117216	2.65852	4.399	4.72836
chrX	138739295	138742741	uc009ult.1	Kcne1l	1.11722	2.3366	5.399	5.9067
chr5	114476921	114543389	uc008yzb.1	Svop	3.70218	4.14395	7.95972	8.44043
chr11	69636624	69653286	uc007jrx.1	Nlgn2	2.28714	3.50652	6.53651	6.78421
chr17	29228716	29237667	uc008bsg.2	Cdkn1a	1.28714	2.65852	5.53651	4.48043
chr13	34166146	34171877	uc007qbb.2	Tubb2a	7.99373	8.27911	12.2281	12.3699
chr1	170049494	170364389	uc007dld.1	Pbx1	0.439144	2.92156	4.66204	4.93986
chr10	59356631	59362464	uc007fed.1	AK046160	0.439144	0.336596	4.66204	4.28779
chr11	59659574	59690035	uc007jfd.1	Nt5m	0.439144	1.3366	4.66204	4.93986
chr10	7924550	8240623	uc007eit.1	Ust	2.02411	2.3366	6.247	5.60971
chrX	72817396	72825543	uc009tqe.1	Rab39b	2.11722	2.65852	6.325	6.06539
chr12	85348451	85358619	uc007oeb.1	Acot1	2.92457	2.3366	7.12147	7.3508
chr14	118632455	118638252	uc007uyt.2	Sox21	4.54348	5.19458	8.73529	8.83358
chr7	31074771	31093386	uc009gea.1	Clip3	6.20997	6.89118	10.399	10.3102
chr7	152119102	152127830	uc012fyc.1	Ccnd1	3.28714	3.50652	7.46939	7.43463
chr7	19509236	19550668	uc012fau.1	Nova2	4.56016	4.86016	8.73529	8.18779
chr8	13567217	13679587	uc009kye.1	Rasa3	6.04203	5.79603	10.2166	10.3978
chr11	5911667	5967751	uc007hxw.1	Camk2b	1.81766	1.92156	5.98397	6.68989
chr13	31896514	31902504	uc007pzp.1	Foxc1	2.43914	1.92156	6.60064	6.18087
chr14	52930855	52937910	uc007tpe.1	Sall2	0.924571	1.3366	5.07708	5.72836
chr9	83003550	83042214	uc009qwc.2	Hmgn3	0.924571	1.92156	5.07708	4.87275
chr7	17543143	17547669	uc009fip.1	Pnmal1	2.02411	1.92156	6.16454	6.63018
chr6	114230628	114267519	uc009dhv.2	Slc6a1	6.29214	6.06452	10.4258	10.5465
chr1	137270464	137273640	uc007ctd.1	Shisa4	2.11722	2.65852	6.247	5.56789
chr10	36857329	36860730	uc007evh.1	AK017779	2.70218	3.3366	6.83196	6.83798
chr5	140381896	140450678	uc009ahi.2	Elfn1	3.47477	4.3366	7.60064	7.95617
chr2	32483019	32490578	uc008jgj.2	Ak1	2.20468	3.92156	6.325	6.23532
chr3	107696771	107701603	uc008qxs.1	Gstm5	5.67946	5.58452	9.79818	9.58896
chr1	195098353	195101382	uc007eei.2	G0s2	2.81766	2.65852	6.93506	6.98823
chr7	25265041	25289552	uc009fps.1	Cadm4	5.2465	4.98045	9.36248	9.64534
chr10	79762564	79781001	uc007gcp.1	Apc2	4.95011	4.98045	9.06576	8.85112
chr13	68758919	69140419	uc007rcf.1	Adcy2	3.60907	3.14395	7.72093	7.3993
chr1	196444022	196643062	uc007een.1	Plxna2	4.6718	4.72891	8.77752	8.96425
chr6	127075726	127103066	uc009dvr.1	Ccnd2	7.69275	7.67645	11.7982	11.7542
chr6	36796021	37251976	uc009bjb.1	Dgki	2.36514	3.50652	6.46939	7.06539
chr1	182258606	182353790	uc007dwg.1	Itpkb	6.083	6.40269	10.1804	10.1722
chr7	4944453	4949703	uc009ezc.1	Zfp579	2.43914	2.3366	6.53651	6.28779
chr8	4257645	4261274	uc009ktp.2	Ctxn1	5.60103	5.38099	9.69179	9.46343
chr2	102289522	102293949	uc008lhw.1	Fjx1	6.92457	7.07806	11.0108	11.2303
chr10	95401296	95508152	uc007gwv.1	Eea1	1.70218	2.65852	5.77752	4.56789
chr17	29194418	29217906	uc008bsf.1	LOC100499420	2.76107	0.336596	6.83196	6.82028
chr5	135178465	135225124	uc008zwv.1	Eln	2.81766	4.03704	6.88443	7.36307
chr9	102406467	102448569	uc009rfp.1	Ky	2.11722	2.65852	6.16454	6.60971
chr2	180330926	180356890	uc008ojl.1	Col9a3	3.2465	2.3366	7.28653	7.41117
chrX	91780812	91789413	uc009ttn.1	Maged1	9.90103	10.1536	13.9405	14.0625
chr19	10138653	10177993	uc008gpb.1	Fads2	7.07141	7.60338	11.1077	11.1413
chr11	96997484	97013026	uc011ydr.1	Tbkbp1	4.95011	5.89118	8.98397	9.26179
chr16	26579790	26717834	uc007yve.2	Il1rap	3.47477	3.3366	7.50334	6.95617
chr19	36806220	36813094	uc008hhs.1	Ppp1r3c	2.57665	3.14395	6.60064	6.38732
chr18	37831988	38001526	uc008eqn.1	Pcdhga3	3.02411	4.24349	7.03127	7.3508
chr17	15504317	15514787	uc008aoi.2	Dll1	6.01808	5.50652	10.0019	10.1546
chr6	48485567	48491799	uc009bup.2	Atp6v0e2	7.34122	7.38099	11.3179	11.3283
chr2	115821803	115890099	uc008lqz.1	Meis2	0.117216	0.336596	4.07708	4.72836
chr3	91884192	91889064	uc008qdk.1	Lor	0.117216	0.336596	4.07708	5.43463
chr9	40821723	40967577	uc009pag.1	Ubash3b	4.62501	4.58452	8.58487	8.26179
chr3	38783861	38910905	uc008pbf.1	Fat4	2.81766	2.92156	6.77752	6.85547
chr5	109121247	109135969	uc008ypa.2	Fgfrl1	1.11722	1.92156	5.07708	6.06539
chr3	105505516	105523760	uc008qvc.2	6530418L21Rik	0.924571	2.3366	4.88443	6.18087
chr13	77272796	77752940	uc007rgx.2	2210408I21Rik	0.439144	1.3366	4.399	4.06539
chr17	17537649	17596351	uc008apg.1	Lix1	0.439144	0.336596	4.399	4.93986
chr17	87360450	87399409	uc008dum.1	Rhoq	6.45707	6.48634	10.4125	10.1861
chr4	139518087	139525941	uc008vmt.1	Klhdc7a	4.50953	4.58452	8.43463	8.32592
chr16	38598455	38715148	uc007zfg.1	Arhgap31	5.80372	5.82845	9.72813	9.74018
chr14	26531125	26590342	uc011zho.1	Zcchc24	7.41184	7.45554	11.3297	11.373
chr8	96674506	96678048	uc009mvu.2	Mt3	4.65637	5.38099	8.56893	8.39929
chr19	12540825	12578486	uc008guc.2	Dtx4	5.48354	5.79603	9.38996	9.36917
chr6	85163044	85285416	uc009cpj.2	Sfxn5	4.78964	4.42406	8.69179	9.04267
chr17	56551848	56617903	uc008dby.2	Ptprs	4.76107	5.03704	8.66204	9.11706
chr13	93379092	93481901	uc007rkt.1	Serinc5	5.85868	5.89118	9.75656	9.76352
chrX	147776765	147908677	uc009upc.1	Fam120c	3.60907	3.3366	7.50334	7.6801
chr2	163689616	163746419	uc008nto.1	Rims4	2.36514	3.14395	6.247	6.48043
chr16	25960408	26107870	uc007yuy.1	Leprel1	2.28714	2.65852	6.16454	5.80236
chrX	106288745	106357806	uc009uct.1	Sh3bgrl	4.59295	3.50652	8.46939	7.67026
chr15	10992544	11276622	uc007vhb.1	Adamts12	2.11722	3.14395	5.98397	5.87275
chr16	85858401	85903370	uc007ztw.1	Adamts5	1.92457	2.92156	5.77752	5.87275
chrX	149439011	149444002	uc009uqp.2	Usp51	1.92457	2.92156	5.77752	5.12429
chr7	135517138	135563686	uc009jyw.1	Rgs10	2.76107	2.3366	6.60064	6.26179
chr4	155263983	155281360	uc008wfj.1	Acap3	6.6486	7.21924	10.4737	10.8314
chr15	72636029	72642754	uc007wbo.1	Peg13	5.1059	5.29079	8.92257	9.04267
chr16	92056566	92087718	uc007zyt.2	Slc5a3	5.1059	4.79603	8.92257	9.17043
chr6	112221751	112280417	uc009ddv.2	Lmcd1	2.50953	2.3366	6.325	6.5028
chr2	51891632	51912201	uc008jqp.1	Tnfaip6	4.54348	4.65852	8.34386	8.44622
chr4	96182828	96222342	uc008tti.2	Cyp2j6	2.92457	1.92156	6.72093	6.65036
chr8	92771010	92874151	uc009msb.2	Tox3	2.92457	2.3366	6.72093	6.43463
chr3	86799757	86805262	uc012cre.1	Cd1d1	1.28714	1.3366	5.07708	5.12429
chr2	109118894	109181903	uc008lmc.1	Kif18a	2.20468	3.3366	5.98397	4.93986
chr19	59531179	59539847	uc008ibl.1	Emx2	2.76107	2.3366	6.53651	6.43463
chr2	118569497	118574543	uc012cbk.1	5430417L22Rik	5.16161	5.79603	8.93506	9.31964
chr1	82229679	82290014	uc007brp.2	Irs1	5.8854	6.11796	9.6545	9.63525
chr11	77326618	77334130	uc007kha.1	Abhd15	2.70218	3.3366	6.46939	6.48043
chr5	147654646	147659302	uc009anm.1	Rasl11a	3.07141	3.65852	6.83196	6.9067
chr17	57183133	57201286	uc008ddu.2	Slc25a23	6.11157	6.60338	9.87149	9.94191
chr12	47795503	47921762	uc007nmd.2	Nova1	3.95011	3.79603	7.69179	7.60971
chr11	69413251	69421462	uc007jqo.1	Atp1b2	4.60907	5.19458	8.34386	8.04267
chr3	7364603	7445365	uc008oof.1	Pkia	3.99986	4.24349	7.72093	7.19468
chr10	82950191	82998885	uc007gkh.2	Aldh1l2	1.81766	2.3366	5.53651	5.33841
chr3	89238625	89254874	uc008pzr.2	Pbxip1	7.58482	7.55576	11.3011	11.3798
chr8	94879694	94885355	uc009mub.1	Irx5	2.76107	3.92156	6.46939	6.28779
chr3	87773014	87777313	uc008ptl.1	Nes	0.702178	0.336596	4.399	4.38732
chr16	33682551	33768281	uc007zai.1	Heg1	3.2465	1.92156	6.93506	6.63018
chr8	37155881	37210841	uc009llf.2	D8Ertd82e	5.29712	6.16949	8.98397	8.99218
chr11	98601186	98626425	uc007lhe.1	Thra	2.92457	2.3366	6.60064	6.28779
chr1	174269340	174304216	uc007dqj.1	Kcnj10	3.76107	3.65852	7.43463	7.03502
chr3	95963892	95975641	uc008qmd.2	Mtmr11	5.63292	5.72891	9.30589	9.36308
chr15	85969530	86018571	uc007xdy.2	Cerk	1.57665	2.92156	5.247	5.72836
chr19	17028607	17298422	uc008gxg.2	Prune2	1.57665	0.336596	5.247	4.38732
chr2	53936503	53939963	uc008jrp.1	Rprm	5.03608	5.38099	8.70643	8.89406
chr3	95792762	95801762	uc008qlx.1	Plekho1	6.23096	6.03704	9.87149	9.79558
chr10	66646497	66719074	uc007fls.2	Jmjd1c	1.43914	1.3366	5.07708	4.72836
chr2	24907898	24912395	uc008iqa.1	Nelf	1.43914	1.3366	5.07708	4.38732
chr5	135548769	135556136	uc008zxr.2	Vps37d	0.439144	0.336596	4.07708	4.56789
chr6	127835639	127903049	uc009ecn.1	Tspan11	2.02411	0.336596	5.66204	5.43463
chr1	137268032	137273640	uc007ctc.1	Shisa4	5.04795	4.92156	8.66204	8.86845
chr1	94805401	94817162	uc007cbw.2	Rnpepl1	5.1833	6.00902	8.79132	8.68989
chr2	26313421	26361342	uc008ivl.2	Notch1	7.47477	8.07806	11.0799	11.136
chr2	103404466	103558580	uc008lix.1	Abtb2	6.12844	6.46588	9.72813	10.0522
chr1	108434755	108612867	uc007cgw.1	Bcl2	2.28714	0.336596	5.88443	5.48043
chr19	3998743	4003814	uc008fyc.1	Nudt8	1.28714	1.92156	4.88443	4.38732
chr1	153731653	153939450	uc007cze.2	1700025G04Rik	4.52661	4.14395	8.12147	8.11706
chr9	62267298	62386851	uc009qaj.1	Coro2b	5.91812	6.26733	9.5117	9.57846
chr5	115877693	115904211	uc008zdv.1	Msi1	3.70218	4.79603	7.28653	7.32592
chrX	19682880	19870890	uc009sst.1	Slc9a7	3.40262	3.79603	6.98397	7.06539
chr2	155205591	155215583	uc008nkk.1	Trp53inp2	6.75746	6.82845	10.3297	10.2716
chr2	20888500	20891975	uc012brm.1	Gm13375	3.36514	3.65852	6.93506	6.92338
chr11	87474588	87549041	uc007kue.2	Rnf43	2.50953	2.3366	6.07708	5.06539
chr9	101007319	101156162	uc009rfh.2	Ppp2r3a	2.11722	1.92156	5.66204	5.60971
chr14	55672329	55717832	uc007txy.2	Thtpa	1.70218	1.92156	5.247	5.43463
chr9	37352077	37362330	uc009ovc.1	Nrgn	3.78964	4.98045	7.325	7.59937
chr19	3913490	3931716	uc008fxq.1	Aldh3b1	4.22574	4.3366	7.7495	7.93164
chr3	113731457	113923244	uc008rbk.1	Col11a1	2.36514	2.92156	5.88443	5.9067
chr6	87930414	87933476	uc009cum.1	H1fx	5.23616	6.14395	8.7495	8.79784
chr11	78000249	78005695	uc007kim.2	Rab34	2.02411	3.3366	5.53651	5.48043
chr6	112667965	112899260	uc009deh.1	Srgap3	4.52661	5.29079	8.03127	7.32592
chr1	69577783	69734534	uc007bjd.2	Ikzf2	1.57665	2.3366	5.07708	4.87275
chr3	108773914	108832525	uc008rac.2	Fam102b	5.50953	5.42406	9.00781	8.96021
chr6	121584190	121629256	uc009doq.1	A2m	3.8721	4.79603	7.36248	7.27485
chr17	25927024	25931229	uc008bbw.1	Fam173a	0.924571	2.65852	4.399	4.48043
chr7	141860804	141969883	uc009kdw.1	Dock1	0.924571	0.336596	4.399	4.06539
chr9	118833653	118953237	uc009rzz.2	Ctdspl	0.924571	3.3366	4.399	4.38732
chr4	147472545	147506807	uc008vua.2	2610109H07Rik	3.81766	3.50652	7.28653	6.97228
chr16	94590345	94690828	uc008aaz.1	Ttc3	4.20468	4.03704	7.66204	7.55725
chr4	126429013	126531580	uc008utw.1	AU040320	3.78964	4.3366	7.247	7.38732
chr7	80883192	80921805	uc009hrf.2	Fam174b	5.60907	5.3366	9.06576	9.03118
chr17	5490599	5753891	uc008aff.1	Zdhhc14	2.43914	2.65852	5.88443	6.03502
chr11	115986021	115994442	uc007mkb.2	Trim65	1.81766	1.3366	5.247	4.18087
chr4	134093806	134110081	uc008vfk.1	Sepn1	6.54767	6.622	9.97189	10.0235
chr7	4689768	4699116	uc009eyj.2	Suv420h2	2.11722	3.65852	5.53651	4.56789
chr9	23025519	23289646	uc009oow.1	Bmper	4.02411	4.24349	7.43463	7.43463
chr11	70845442	70849119	uc007jxo.1	6330403K07Rik	3.84514	4.24349	7.247	7.16693
chr18	37878207	38001526	uc008equ.1	Pcdhgb4	3.64078	4.14395	7.03127	6.58896
chr11	118899749	118904227	uc007mpu.1	Cbx8	4.11722	4.42406	7.50334	7.59937
chr11	72590733	72611341	uc007jzi.2	Cyb5d2	1.28714	1.92156	4.66204	4.28779
chr14	17195719	17263301	uc007shc.1	Top2b	5.19403	4.72891	8.56893	8.50834
chr17	22916824	22956714	uc012alr.1	Gm16386	2.28714	1.92156	5.66204	5.60971
chr17	81341971	81401156	uc008drn.1	Tmem178	2.02411	2.92156	5.399	5.76583
chr6	124863692	124869964	uc009dsm.2	Ptms	9.04647	9.60572	12.4158	12.3745
chr7	31140532	31149791	uc009gee.1	Lrfn3	4.26696	5.03704	7.63167	7.9067
chr17	10403044	10514226	uc012ajv.1	Qk	3.99986	4.24349	7.36248	6.74722
chr18	37899747	38001526	uc008eqy.1	Pcdhgb6	3.36514	4.42406	6.72093	6.45771
chr2	131818585	131857724	uc008mmf.2	Rassf2	4.74657	4.50652	8.09944	8.18779
chr1	154364659	154474241	uc007czh.1	Rgl1	4.99986	5.09148	8.34386	8.77964
chr2	32270006	32288671	uc008jfo.2	Slc25a25	2.43914	3.14395	5.77752	6.26179
chr7	5029906	5049778	uc009ezx.1	Epn1	2.43914	3.79603	5.77752	5.60971
chr19	41902459	41907073	uc008hmi.2	Frat1	4.62501	4.72891	7.95972	8.08035
chrX	70471644	70476134	uc009tlk.1	F8a	5.4301	5.76286	8.76358	8.91506
chr19	7129257	7272552	uc008gkg.2	Macrod1	3.70218	4.50652	7.03127	7.09514
chr7	134165650	134171993	uc009jub.1	Maz	2.92457	3.50652	6.247	7.16693
chr4	126844514	126914266	uc008uuo.2	Dlgap3	1.57665	1.3366	4.88443	4.06539
chr3	62140698	62266143	uc008pjm.1	Arhgef26	5.3746	5.3366	8.67699	8.55189
chr6	125297740	125312501	uc009dul.2	Tnfrsf1a	6.1725	6.38099	9.46939	9.59937
chr15	99252464	99290179	uc007xpn.1	Nckap5l	6.20468	6.67645	9.49493	9.44333
chr18	37888807	38001526	uc008eqw.1	Pcdhgb5	3.2465	4.14395	6.53651	6.33841
chr7	152115835	152127830	uc009kqt.1	Ccnd1	10.7425	10.6842	14.0324	13.8951
chr19	6382428	6398459	uc008gio.1	Pygm	4.54348	4.98045	7.83196	8.00399
chr15	57524221	57671387	uc007vsp.1	Zhx2	3.99986	4.03704	7.28653	7.12429
chr1	50982366	51244114	uc007axj.1	Tmeff2	2.11722	0.336596	5.399	5.06539
chr5	135911360	135936112	uc008zyl.1	Hip1	2.11722	1.3366	5.399	5.06539
chr2	155341778	155388479	uc008nku.1	Acss2	4.47477	4.3366	7.7495	7.58896
chr11	94850525	94868212	uc007kzr.2	Ppp1r9b	6.41184	6.93651	9.68441	9.93576
chr16	20515136	20532260	uc007ypw.1	Dvl3	2.9752	2.92156	6.247	6.20835
chr5	131350820	131785392	uc008zuq.1	Wbscr17	3.6718	4.03704	6.93506	6.48043
chr6	37281020	37394148	uc009bjf.2	Creb3l2	5.02411	4.79603	8.28653	7.96425
chr19	5344704	5351574	uc008gcq.1	Cst6	1.81766	1.92156	5.07708	4.65036
chrX	50408222	50412367	uc009tes.1	AK021262	1.81766	0.336596	5.07708	4.38732
chr17	87680225	87781110	uc008duv.2	Ttc7	4.1833	4.24349	7.43463	7.45771
chr8	10986963	11010430	uc009kuz.1	Irs2	6.7356	7.27911	9.98397	10.0177
chr2	30328160	30331719	uc008jco.1	Ier5l	6.931	7.37002	10.1698	10.4847
chr7	87731517	87835763	uc009iaz.1	Crtc3	4.45707	4.50652	7.69179	7.71884
chr4	122624093	122640431	uc008uoo.2	Mfsd2a	4.40262	4.58452	7.63167	7.6996
chr17	50646871	50827819	uc012avf.1	Plcl2	4.49226	4.24349	7.72093	7.44622
chr13	102450717	102540172	uc007rrt.1	Pik3r1	3.02411	2.3366	6.247	6.15286
chr11	68900029	68905883	uc007jpe.1	Vamp2	4.71713	5.24349	7.93506	7.24862
chr3	59120656	59150178	uc008piu.2	Igsf10	3.32667	3.50652	6.53651	6.00399
chr15	88917536	88930770	uc007xff.1	1300018J18Rik	5.98758	5.92156	9.19602	9.32278
chr2	29098757	29109560	uc008izq.1	mKIAA1857	3.11722	3.3366	6.325	6.9067
chr14	26276777	26467976	uc007srm.1	Zmiz1	2.57665	2.92156	5.77752	5.93986
chr8	73999917	74011966	uc009mdm.2	Ano8	2.57665	2.92156	5.77752	4.87275
chr9	70446820	70506981	uc009qon.1	Fam63b	2.57665	3.14395	5.77752	6.06539
chr19	34623183	34651024	uc008hgn.2	Ifit2	2.20468	2.65852	5.399	5.06539
chr1	58084812	58163254	uc007bbl.1	Aox1	2.9752	3.14395	6.16454	5.65036
chr14	100269861	100551014	uc007uvh.1	Klf12	5.21525	5.38099	8.399	8.02733
chr9	89594040	89601881	uc009qzo.2	Tmed3	6.73927	6.76286	9.92257	10.1386
chr17	34257776	34276028	uc008cbl.1	H2-DMa	1.70218	2.65852	4.88443	4.06539
chr8	122384204	122400889	uc009nqm.1	Klhl36	3.28714	4.14395	6.46939	7.08034
chrX	148576810	148659779	uc009upy.1	Iqsec2	1.70218	2.92156	4.88443	5.28779
chr5	111306821	111718799	uc008yrz.2	Ttc28	5.12844	5.14395	8.30589	8.22862
chr2	27296038	27299773	uc008ixj.1	BC094334	4.07141	5.03704	7.247	6.54652
chrX	45525147	45563879	uc009tbx.2	Zdhhc9	5.07141	4.79603	8.247	8.21514
chr4	94715726	94720913	uc008tsq.2	Jun	7.35323	7.40269	10.5283	10.5479
chr8	121916791	121934988	uc009npn.1	Mlycd	4.22574	4.98045	7.399	7.89828
chr11	107794700	108207202	uc011ygr.1	Prkca	4.57665	4.92156	7.7495	7.59937
chr7	112629129	112632711	uc009iye.1	Prkcdbp	4.95011	5.622	8.12147	8.21514
chr1	72869076	72899045	uc007bkw.1	Igfbp2	11.1544	11.6232	14.3176	14.5551
chr11	80621916	80635535	uc007kmj.1	Tmem98	6.28714	6.35896	9.4434	9.60714
chr13	23795709	23804680	uc007pup.1	Hfe	1.92457	2.92156	5.07708	4.87275
chr17	63395300	63851929	uc008dfl.2	Fbxl17	1.92457	0.336596	5.07708	4.72836
chr19	7166501	7182219	uc008gkh.2	Flrt1	0.924571	1.92156	4.07708	5.06539
chr9	56923022	56925820	uc009ptw.1	AK012238	0.924571	2.65852	4.07708	4.38732
chr10	78047247	78056709	uc007fyb.2	Syde1	7.34844	7.52642	10.4949	10.611
chr8	72906256	72965472	uc009mae.1	Crtc1	5.53507	6.26733	8.67699	8.6403
chr5	3926185	4080204	uc008wid.1	Akap9	3.84514	4.03704	6.98397	6.68989
chr15	78755154	78760895	uc007wrv.1	Lgals1	11.3288	11.6133	14.4664	14.5575
chr18	37838111	38001526	uc008eqo.1	Pcdhgb1	2.64078	1.92156	5.77752	6.03502
chr5	105842793	105915208	uc008yle.1	Lrrc8b	4.26696	4.42406	7.399	7.98823
chr16	9577802	9994626	uc007ydc.1	Grin2a	2.11722	2.92156	5.247	5.60971
chr12	114422113	114427733	uc007pgc.1	Tmem121	6.16161	6.19458	9.28653	9.26833
chr3	96403055	96429275	uc008qnh.1	Lix1l	6.4879	6.42406	9.60846	9.80461
chr10	128237091	128243426	uc007hoi.1	1110012D08Rik	5.96896	5.86016	9.0883	9.28456
chr14	26404289	26410147	uc007srp.1	4931406H21Rik	1.28714	1.92156	4.399	4.56789
chr3	57645816	57653679	uc008phn.2	Pfn2	1.28714	1.3366	4.399	4.38732
chr8	25548087	25551418	uc009lex.1	1810011O10Rik	4.0945	4.03704	7.20636	7.33841
chr1	94814190	94820961	uc011wpm.1	AK138067	1.28714	2.3366	4.399	4.18087
chr2	32004667	32090057	uc008jen.2	Prrc2b	4.98758	5.38099	8.09944	8.13864
chr11	116197658	116276346	uc007mky.2	Rnf157	2.9752	3.79603	6.07708	6.65036
chr4	124332888	124337899	uc008uqt.1	Pou3f1	7.80721	7.84439	10.9068	11.0273
chr11	117125559	117223639	uc007mne.2	2017-09-09	2.43914	2.3366	5.53651	5.48043
chrX	8467478	8472103	uc009spi.2	B630019K06Rik	2.43914	3.3366	5.53651	5.33841
chr6	83312367	83393672	uc009cni.2	Tet3	6.05973	6.60338	9.15389	9.14577
chr3	51491534	51910928	uc008pef.2	Maml3	1.57665	1.3366	4.66204	4.65036
chr5	152170881	152232785	uc009aup.1	AK021342	1.57665	2.65852	4.66204	4.48043
chr10	80287426	80292029	uc011xiy.1	AK087942	2.57665	3.14395	5.66204	4.87275
chr19	5296330	5308739	uc008gco.2	Gal3st3	3.16161	4.72891	6.247	6.38732
chr2	25256602	25265014	uc008irx.1	Npdc1	3.99986	3.3366	7.07708	7.20835
chr6	37277375	37283285	uc009bje.1	Creb3l2	3.70218	3.50652	6.77752	6.54652
chr7	134486308	134490828	uc009jvc.1	Zfp768	6.12844	6.31388	9.19602	9.21175
chr3	124021954	124026178	uc008rfr.1	Tram1l1	3.81766	3.50652	6.88443	6.63018
chr3	10010605	10016610	uc008opg.1	Fabp5	8.89036	8.89884	11.9459	12.0845
chr6	47604919	47704924	uc009bte.1	Rn4.5s	2.02411	3.50652	5.07708	4.93986
chr13	49131670	49245383	uc009val.1	Wnk2	2.02411	2.92156	5.07708	5.28779
chr7	16857361	16861041	uc012fag.1	Prr24	3.11722	3.50652	6.16454	6.54652
chr2	156836177	156907001	uc008nol.2	9830001H06Rik	7.9814	8.20696	11.0284	11.2378
chr7	4875445	4896399	uc009eza.1	A430110N23Rik	2.20468	3.14395	5.247	5.52483
chr11	61589099	61670594	uc007jih.2	Ulk2	4.59295	4.58452	7.63167	7.56789
chr15	78257057	78269733	uc011zvs.1	Kctd17	3.28714	3.79603	6.325	6.00399
chrX	7213705	7230382	uc009sls.2	Syp	4.43914	4.42406	7.46939	7.23532
chr12	76407299	76502442	uc007nxc.1	Rhoj	4.80372	4.98045	7.83196	7.55725
chr2	152219347	152225782	uc008nfi.1	Sox12	7.19403	7.73748	10.2217	10.3165
chrX	149470708	149474106	uc009uqq.1	Mageh1	6.11157	6.09148	9.13236	9.33218
chr4	115669260	115692507	uc008ufs.2	Faah	3.76107	3.79603	6.77752	7.44622
chr7	133414132	133438513	uc009jqw.1	Sbk1	8.33396	8.75022	11.3462	11.6104
chr5	62993684	63159416	uc008xma.2	Arap2	5.73927	5.72891	8.7495	8.28779
chr3	107729251	107736663	uc008qxt.1	Gstm7	4.65637	4.65852	7.66204	7.82916
chr1	137503023	137586682	uc007ctn.1	Nav1	3.07141	3.50652	6.07708	6.23532
chr6	125256588	125265888	uc009duj.1	Ltbr	6.73193	6.93651	9.73529	9.83798
chr1	174126859	174138912	uc007dpy.1	Pea15a	9.5674	9.66303	12.5689	12.6783
chr11	61888598	62036515	uc007jin.1	Specc1	6.4301	6.21924	9.4258	9.53571
chr10	94253611	94409212	uc007gvz.2	Plxnc1	3.60907	3.50652	6.60064	5.83798
chr2	83650884	83721515	uc008kie.1	Fam171b	4.56016	4.58452	7.53651	7.60971
chr14	112072336	112082357	uc011zpr.1	Slitrk5	4.83146	3.79603	7.805	7.78421
chr14	67421700	67489437	uc007uko.1	Dpysl2	8.56016	8.5606	11.5283	11.5752
chr1	162149304	162283702	uc007deh.1	Rabgap1l	2.70218	1.92156	5.66204	5.28779
chr10	53016059	53101657	uc007fbn.1	Gm9766	2.28714	3.14395	5.247	5.83798
chr11	116192017	116199704	uc007mkw.1	Foxj1	1.43914	1.92156	4.399	5.60971
chr4	93000838	93004202	uc008tou.1	Tusc1	3.43914	4.24349	6.399	5.93986
chr5	33970573	33974741	uc008xau.1	AK040173	1.43914	1.92156	4.399	4.06539
chr5	135882387	136022992	uc008zyk.2	Hip1	4.8721	4.72891	7.83196	8.11706
chr7	54304009	54310146	uc009gzy.1	Tmem86a	3.28714	4.14395	6.247	6.18087
chr8	19863863	19895010	uc009lau.2	6820431F20Rik	4.57665	4.50652	7.53651	6.70925
chr10	75714580	75724064	uc007fuc.2	S100b	2.11722	2.65852	5.07708	4.56789
chr12	112947703	112953128	uc007pdr.2	Bag5	1.11722	0.336596	4.07708	4.06539
chr9	123385818	123426767	uc009sge.2	Limd1	1.11722	1.3366	4.07708	4.56789
chr14	65811277	65883300	uc007ujb.2	Fzd3	6.0945	5.89118	9.04286	8.88557
chr7	87486022	87490983	uc009ian.1	Hddc3	5.28714	5.92156	8.22682	8.01181
chr15	76075236	76080334	uc007wjl.1	Grina	7.74292	8.0231	10.6807	10.6776
chr6	86798400	86801434	uc009csq.2	2610306M01Rik	4.13958	4.86016	7.07708	6.93986
chr4	115892518	115975661	uc008ugm.1	Pik3r3	5.50092	5.19458	8.43463	8.60971
chr8	3491137	3497208	uc009krp.1	Zfp358	7.04795	7.44512	9.97794	9.97028
chr12	114376446	114383717	uc007pfy.2	Crip2	9.08011	9.622	12.0078	12.0645
chr16	23468435	23522663	uc007yts.1	Masp1	4.36514	5.09148	7.28653	7.10979
chr4	119939682	119961866	uc008unc.1	Foxo6	3.07141	4.3366	5.98397	5.97228
chr10	57512349	57531636	uc007fcu.1	Smpdl3a	2.8721	2.65852	5.77752	5.60971
chr11	20202182	20234716	uc007idb.2	Slc1a4	6.96896	6.92156	9.87149	10.0748
chr1	174560899	174565105	uc007dqw.1	Dusp23	2.64078	2.92156	5.53651	4.56789
chr13	99868660	99877535	uc007rpk.1	AK145614	3.64078	4.24349	6.53651	6.36307
chr11	69212019	69229175	uc007jqe.1	Kdm6b	3.99986	5.03704	6.88443	6.98823
chr1	172572662	172612920	uc007dmi.2	Olfml2b	4.40262	4.14395	7.28653	6.92338
chr11	120438548	120444561	uc007mtj.1	Arhgdia	2.36514	3.79603	5.247	5.33841
chr4	41514826	41585191	uc008sjc.2	Dnaic1	2.36514	3.79603	5.247	4.65036
chr6	108607038	108611531	uc009ddm.1	AK042445	2.36514	2.92156	5.247	4.65036
chr2	146045732	146050754	uc008msh.2	Insm1	4.2465	4.03704	7.12147	7.65036
chr1	145846467	145853279	uc007cxg.2	Rgs2	3.20468	1.3366	6.07708	6.06539
chr11	3807024	3816667	uc007htv.1	Slc35e4	6.76107	7.05084	9.63167	9.78877
chr2	122420208	122439013	uc008maw.2	Gatm	4.64078	4.58452	7.50334	7.12429
chr15	76545705	76554603	uc007wme.1	Lrrc24	2.02411	3.14395	4.88443	4.48043
chr8	36648851	36742503	uc009lla.1	Mfhas1	3.54348	3.92156	6.399	6.56789
chr11	31898458	31959202	uc007iiw.1	Nsg2	4.26696	4.58452	7.12147	7.23532
chr8	37155881	37165798	uc009lld.2	D8Ertd82e	2.92457	3.92156	5.77752	5.48043
chr3	137284635	137291296	uc008rmn.2	Ddit4l	7.60304	7.31388	10.4521	10.4958
chr7	29153697	29159681	uc009fyr.1	Clg	1.81766	2.3366	4.66204	4.56789
chr2	156137581	156140440	uc008nnc.2	Scand1	7.37224	8.05084	10.2166	10.3707
chr17	83612622	83624409	uc012axu.1	Pkdcc	4.59295	4.65852	7.43463	7.77505
chr17	34162977	34167000	uc008cat.2	H2-Ke6	5.43914	5.72891	8.2669	8.78877
chr19	10255377	10271362	uc008gpe.2	Fads1	8.40146	8.35896	11.2268	11.299
chr14	79688556	79703442	uc007ust.1	1190002H23Rik	4.92457	5.03704	7.7495	8.05029
chr5	144011373	144033701	uc009ajw.2	Zfp316	5.29712	5.3366	8.12147	8.86845
chr13	94539633	94712971	uc007rlo.1	Arsb	3.16161	3.3366	5.98397	5.33841
chr2	146679624	146795825	uc008mso.1	Plk1s1	3.57665	2.92156	6.399	6.60971
chr1	185856910	185859877	uc011wxw.1	1700056E22Rik	1.57665	1.3366	4.399	4.18087
chr19	6985466	6998298	uc008gjg.1	Esrra	6.33638	6.71164	9.15389	9.23866
chr9	56765006	56778178	uc009ptp.1	Snx33	6.53928	6.622	9.3532	9.76352
chr17	28312362	28342831	uc008bqg.2	Zfp523	5.64078	6.26733	8.45212	8.60455
chr15	12963954	13105394	uc007vif.1	Cdh6	2.43914	1.92156	5.247	5.48043
chr10	23941322	24022589	uc007equ.1	Moxd1	4.32667	3.79603	7.12147	6.88982
chr1	137005074	137031152	uc007csr.2	Ptprv	5.98758	6.26733	8.77752	8.82028
chr7	4864818	4873605	uc009eyx.1	Zfp628	5.19403	5.65852	7.98397	8.26179
chr11	120047963	120053170	uc007msb.2	2810410L24Rik	3.28714	3.14395	6.07708	6.18087
chr11	86847295	86889639	uc007kte.2	Gdpd1	5.60907	5.72891	8.399	8.35695
chr3	67261920	67269829	uc008pln.1	Lxn	6.37931	6.3366	9.16454	9.36308
chr7	29078573	29088804	uc009fye.1	Dll3	5.2465	4.92156	8.03127	8.46343
chr7	35902311	35906951	uc009gjl.1	Cebpa	4.81766	4.03704	7.60064	7.93986
chr1	94726262	94756773	uc007cbs.1	Gpc1	8.57357	8.86407	11.3555	11.491
chr16	4637944	4651166	uc007xzz.2	Vasn	6.46594	6.44512	9.247	9.25192
chr16	23965137	23990698	uc007ytz.1	Bcl6	4.20468	3.79603	6.98397	6.76583
chr4	123026875	123363603	uc008upr.2	Macf1	4.16161	3.65852	6.93506	6.12429
chr18	37852154	38001526	uc008eqr.1	Pcdhga5	3.47477	2.3366	6.247	6.18087
chr15	78742348	78749947	uc007wru.1	Pdxp	7.77721	8.26141	10.5488	10.7831
chr3	89068473	89070999	uc008pym.1	Dpm3	5.76827	6.50652	8.53651	8.7612
chr16	10530299	10545147	uc007ydx.1	Dexi	5.70218	6.11796	8.46939	8.51385
chr4	81974497	82153212	uc008tkg.2	Nfib	2.11722	2.92156	4.88443	4.06539
chr2	25282193	25304059	uc008isc.1	Abca2	7.19403	7.54605	9.95972	10.1189
chr2	13493937	13504453	uc008ikb.2	Vim	11.7689	11.7919	14.5283	14.5781
chr7	87070244	87082150	uc009hzh.1	2610034B18Rik	5.91812	5.86016	8.67699	8.56789
chr6	85860147	85867671	uc009cqk.2	Cml1	2.64078	2.92156	5.399	5.23532
chr11	94887571	94904685	uc007kzu.2	Pdk2	4.36514	5.19458	7.12147	7.59937
chr19	44366165	44381352	uc008hpp.2	Scd2	11.7572	11.7013	14.5067	14.6126
chr7	126115553	126140725	uc009jkx.2	Gprc5b	6.4879	6.26733	9.22682	9.2219
chr12	82730355	82768538	uc007ocn.1	Ttc9	2.50953	1.3366	5.247	5.18087
chr19	45652746	45736683	uc008hrf.1	Fbxw4	4.83146	5.03704	7.56893	7.82916
chr7	134750548	134759947	uc009jwh.1	Zfp629	1.92457	2.92156	4.66204	5.18087
chr17	10510783	10514006	uc012ajw.1	B930003M22Rik	2.50953	2.92156	5.247	4.80236
chr13	49280915	49291620	uc007qiw.1	Ninj1	6.28714	6.76286	9.01959	9.11706
chr7	142881470	142910062	uc009kem.2	Mki67	7.26187	7.23141	9.98997	9.64282
chr12	51442218	51752210	uc007nmj.1	Prkd1	3.6718	3.14395	6.399	6.52483
chr8	97850035	97857850	uc009myf.1	Zfp319	5.90512	6.40269	8.63167	9.02733
chr5	149683159	149742223	uc009aow.2	Katnal1	5.43914	5.76286	8.16454	7.98823
chrX	102313734	102319250	uc009uav.1	Magee1	5.05973	5.24349	7.77752	7.51385
chr11	90337806	90501422	uc007kwu.2	Stxbp4	3.36514	3.92156	6.07708	6.18087
chr14	32187149	32251219	uc007sxp.1	Sh3bp5	2.36514	1.3366	5.07708	4.38732
chr5	40005173	40037870	uc008xgy.2	Hs3st1	3.36514	3.50652	6.07708	5.52483
chr9	20574493	20621478	uc009ojf.1	Col5a3	3.95011	4.42406	6.66204	6.31332
chr5	143176054	143198443	uc009aiz.1	Slc29a4	5.6718	6.06452	8.38086	8.55725
chr8	97198794	97222142	uc009mwv.1	Pllp	4.76107	5.3366	7.46939	7.09514
chr11	21221144	21272882	uc007ids.2	Ugp2	3.07141	2.3366	5.77752	5.65036
chr10	77736816	77817187	uc007fxr.1	Agpat3	1.70218	1.3366	4.399	4.38732
chr19	55814299	55985039	uc008hya.2	Tcf7l2	1.70218	2.92156	4.399	4.65036
chr5	123320684	123352359	uc008zmq.1	Kdm2b	1.70218	1.3366	4.399	4.28779
chr6	122768201	122795384	uc012esh.1	Foxj2	5.59295	6.52642	8.28653	8.22862
chr11	72265139	72305406	uc007jyz.2	Spns2	2.20468	2.3366	4.88443	4.87275
chr3	148551904	148654444	uc008rsc.1	Lphn2	2.20468	2.65852	4.88443	5.23532
chr2	31803822	31828962	uc008jeg.1	Aif1l	7.61905	7.64948	10.2962	10.4361
chr1	185856339	185899515	uc007dym.1	Dusp10	5.53507	5.86016	8.20636	8.00399
chr1	87789084	87805273	uc011wof.1	Itm2c	9.20003	9.43463	11.8682	12.0162
chr19	44468939	44484199	uc008hpr.2	Scd1	8.89693	9.00193	11.5589	11.4251
chr7	117769182	117773333	uc009jfj.1	Adm	5.84514	6.03704	8.50334	8.64534
chr7	75095142	75378553	uc009hja.1	Igf1r	4.98758	5.72891	7.63167	7.56789
chr7	6083090	6109573	uc009fap.1	Zfp787	6.07722	6.50652	8.72093	8.51385
chr8	73980598	73989556	uc009mdf.2	Abhd8	6.50092	6.56541	9.14317	9.31964
chr7	109387636	109400632	uc009irk.1	Rhog	6.0945	6.622	8.73529	8.83358
chr7	116152393	116177973	uc009jdf.1	Tub	6.30704	6.03704	8.94744	9.13148
chr10	86239749	86301134	uc007gqn.1	Nt5dc3	1.43914	2.3366	4.07708	4.18087
chr2	32441009	32455994	uc008jfz.1	St6galnac4	1.43914	1.3366	4.07708	4.87275
chr5	131913551	132016557	uc008zuu.1	Auts2	1.43914	1.3366	4.07708	4.06539
chr7	148512028	148523054	uc009kkq.2	Tmem80	1.43914	1.92156	4.07708	4.18087
chr9	42328494	42754454	uc009paz.2	Grik4	1.43914	1.92156	4.07708	4.93986
chr1	94804956	94809266	uc007cbv.1	AK017177	2.02411	2.3366	4.66204	4.93986
chr11	96895915	96904683	uc007ldl.1	Lrrc46	3.02411	3.92156	5.66204	5.43463
chr12	21396189	21425297	uc007ndw.1	Ywhaq	2.02411	2.65852	4.66204	4.38732
chr17	24610495	24617988	uc008awg.2	Mlst8	2.02411	2.92156	4.66204	4.28779
chr5	129085004	129108562	uc008zsg.1	5930412G12Rik	2.02411	3.14395	4.66204	4.28779
chr4	58055667	58221468	uc008syr.1	Svep1	3.89858	3.79603	6.53651	6.28779
chr4	124526728	124529974	uc008urd.2	1110065P20Rik	6.38868	7.10478	9.00781	9.12068
chr6	29683496	29711366	uc009bef.2	Smo	8.46594	8.6358	11.0799	11.2345
chr11	43340285	43400499	uc007ims.1	Ccnjl	5.34603	5.622	7.95972	7.85547
chr11	29271774	29410811	uc007igw.1	Ccdc88a	2.92457	1.92156	5.53651	4.87275
chr6	30686062	30698457	uc009bfu.1	Mest	2.92457	2.92156	5.53651	5.23532
chr13	41277750	41317772	uc007qfb.2	Elovl2	4.85868	4.42406	7.46939	7.09514
chr9	21034173	21045776	uc009oko.2	Keap1	4.421	5.09148	7.03127	6.52483
chr13	34218876	34224223	uc007qbd.1	Tubb2b	10.4164	10.5202	13.0233	13.1064
chr11	20990120	21049405	uc007idm.1	Peli1	2.64078	2.92156	5.247	4.48043
chr6	32094558	32540192	uc009bgm.2	Plxna4	3.47477	3.92156	6.07708	6.48043
chr8	27131892	27231696	uc009lhj.2	Hook3	5.50092	5.54605	8.09944	7.6801
chr3	103768458	103774239	uc008qty.2	A130049A11Rik	2.28714	2.3366	4.88443	4.18087
chr4	151850250	151937293	uc008wap.1	Nphp4	4.28714	4.42406	6.88443	7.56789
chr7	52118437	52127158	uc009grk.1	Ptov1	6.8107	7.20696	9.40799	9.72361
chr3	88625931	88638409	uc012csc.1	1500004A13Rik	2.28714	2.65852	4.88443	5.12429
chr4	148607842	148683807	uc008vwa.1	Kif1b	4.80372	4.65852	7.399	6.83798
chr4	43504275	43508792	uc008spy.1	Ccdc107	5.892	6.26733	8.48647	8.25522
chr8	127314918	127358604	uc012gmz.1	Trim67	3.07141	3.65852	5.66204	5.06539
chr19	6992546	6998298	uc008gjh.1	Esrra	3.57665	4.03704	6.16454	5.72836
chr15	60650550	60658635	uc007vya.2	Fam84b	5.91812	6.16949	8.50334	8.48043
chr17	24831178	24837474	uc008axs.2	Noxo1	1.81766	1.92156	4.399	4.48043
chr18	37894589	38001526	uc008eqx.1	Pcdhga9	2.81766	4.14395	5.399	5.12429
chr2	92292921	92301951	uc008kyb.1	Slc35c1	1.81766	2.3366	4.399	4.65036
chr2	160189412	160194801	uc008nqw.2	Mafb	1.81766	2.65852	4.399	4.38732
chr5	33081784	33086882	uc008wzx.1	Pisd	1.81766	3.14395	4.399	4.28779
chr7	52136292	52149736	uc009grs.1	Med25	1.81766	1.92156	4.399	4.28779
chrX	130425608	130434968	uc009ufa.1	Tspan6	6.47477	6.31388	9.05436	9.11343
chr17	56299913	56313378	uc008dbf.2	Tnfaip8l1	4.6718	4.72891	7.247	6.72836
chr7	19677892	19683694	uc009fkr.1	Six5	4.59295	4.72891	7.16454	7.24862
chr9	121667150	121680860	uc012hcs.1	Zfp651	5.15064	5.42406	7.72093	8.13864
chr4	88952197	88958941	uc008tok.2	Cdkn2b	5.55184	5.72891	8.12147	8.43463
chr11	63698194	63737786	uc007jkn.1	Hs3st3b1	6.27709	6.56541	8.84526	8.54113
chr18	74938047	74940109	uc012bey.1	Scarna17	2.50953	1.92156	5.07708	4.72836
chr7	134725896	134734109	uc009jwd.2	Gm166	4.64078	4.79603	7.20636	7.33841
chr4	116548006	116661710	uc008uhq.1	Zswim5	5.76107	5.82845	8.325	8.48606
chr10	82693883	82802562	uc007gkf.1	Slc41a2	5.12844	5.19458	7.69179	7.91506
chr18	31739821	31771556	uc008ehz.1	Slc25a46	3.32667	3.50652	5.88443	4.87275
chr11	75005494	75081264	uc007kdh.1	Rtn4rl1	3.60907	3.65852	6.16454	6.00399
chr7	26100182	26150936	uc009fsj.2	Megf8	7.19403	7.42406	9.7495	9.85764
chr13	29042598	29047551	uc007pyk.1	Sox4	8.17114	8.30814	10.7245	10.7295
chr5	54387761	54512296	uc008xlq.2	Stim2	5.50953	5.46588	8.05436	8.11706
chr1	52713147	52786162	uc007ayl.2	Mfsd6	2.11722	3.14395	4.66204	4.38732
chr19	15979621	16001091	uc008gwo.1	Psat1	2.11722	1.3366	4.66204	4.48043
chr5	141178976	141191889	uc009aia.1	AA881470	2.11722	2.3366	4.66204	4.06539
chr6	47825553	47842812	uc009btk.1	Zfp282	2.11722	2.65852	4.66204	4.06539
chr7	51721425	51727021	uc009gpm.1	Josd2	2.11722	2.92156	4.66204	5.18087
chr9	21526037	21542976	uc009omg.1	Ldlr	3.11722	3.65852	5.66204	5.56789
chr9	75471538	75485580	uc009qsq.1	Lysmd2	2.11722	2.92156	4.66204	5.12429
chrX	99042723	99287394	uc012hmz.1	Nhsl2	3.11722	3.14395	5.66204	5.18087
chr17	56146623	56156206	uc008dap.1	Mpnd	8.52661	8.87576	11.0686	11.136
chr10	34015226	34021126	uc007euu.1	Tspyl4	5.96271	6.19458	8.50334	8.15286
chr4	135697736	135701307	uc012dnf.1	Id3	7.66604	7.67645	10.2064	10.4563
chr4	149654024	149996075	uc008vxr.1	Rere	4.1833	5.69415	6.72093	6.58896
chr5	8966047	8999146	uc008wkt.1	Crot	5.3746	5.54605	7.90997	7.55725
chr14	22803183	22810823	uc007slv.1	Zfp503	3.78964	3.79603	6.325	5.72836
chr7	151007071	151034315	uc009kqc.1	Dhcr7	7.75021	8.18209	10.2816	10.3244
chr18	34378637	34481844	uc008eke.2	Apc	7.12564	6.77954	9.6545	9.14932
chr4	42961267	42971604	uc008son.1	Dnajb5	3.64078	3.50652	6.16454	5.87275
chr12	86812850	86818219	uc007oha.1	Fos	5.78255	6.14395	8.30589	8.66034
chr14	67485686	67489842	uc007ukp.1	Gm5464	2.36514	2.92156	4.88443	5.00399
chr6	92722692	92853435	uc009czb.2	Adamts9	4.68707	4.79603	7.20636	6.76583
chr13	52599743	52628205	uc007qmv.1	Diras2	3.02411	2.65852	5.53651	5.43463
chr7	31512597	31530948	uc009ggc.1	AK049951	3.81766	4.24349	6.325	6.06539
chr2	131003024	131007748	uc008mkx.1	Cenpb	9.3382	9.63122	11.8419	11.9862
chr18	16747385	16969558	uc008edx.2	Cdh2	7.28212	7.21924	9.78444	9.50834
chr1	177592558	177624721	uc007dtq.1	Opn3	2.57665	3.14395	5.07708	5.18087
chr11	117191626	117223639	uc007mng.2	2017-09-09	1.57665	1.3366	4.07708	4.06539
chr14	56107929	56127101	uc007tyo.1	Lrrc16b	2.57665	2.65852	5.07708	5.52483
chr2	91113396	91286799	uc008kvs.1	1110051M20Rik	1.57665	1.3366	4.07708	4.48043
chr5	33590673	33619653	uc008xao.2	Ctbp1	3.57665	3.65852	6.07708	5.9067
chr2	92815062	92888301	uc012bzp.1	Prdm11	1.57665	3.14395	4.07708	4.18087
chr4	83101584	83134294	uc008tkw.1	Psip1	5.22574	5.24349	7.72093	6.87275
chr19	46378082	46382101	uc008hss.1	AK029443	3.9752	3.92156	6.46939	6.23532
chr17	66001065	66124092	uc008dgh.2	Rab31	4.83146	3.92156	7.325	7.79331
chr6	57702257	57777119	uc009cco.1	Vopp1	5.58482	5.29079	8.07708	7.93986
chr4	123080843	123091154	uc012dkt.1	D830031N03Rik	5.13958	4.79603	7.63167	7.19468
chr9	108995949	109022429	uc009rrz.2	Plxnb1	7.97208	8.28496	10.4565	10.6314
chr19	42054252	42109131	uc008hmz.1	Ubtd1	6.6718	6.92156	9.15389	9.38732
chr8	73898017	73907851	uc009mcx.1	Nr2f6	6.82457	7.27911	9.30589	9.70684
chr7	150236654	150253835	uc009kou.2	Cd81	11.2868	11.6483	13.7679	13.7523
chr11	120642058	120647518	uc007mum.1	Rfng	5.66411	6.19458	8.14317	7.70925
chr5	24098439	24109820	uc008wsd.1	Smarcd3	6.62104	6.65852	9.09944	9.24862
chr13	19683576	19713699	uc007ppe.2	Epdr1	1.92457	2.92156	4.399	5.80236
chr15	81686163	81690753	uc007wxn.1	AK044623	2.92457	2.92156	5.399	5.80236
chr16	33682551	33722999	uc007zah.1	Heg1	1.92457	0.336596	4.399	4.28779
chr17	23861302	23873696	uc008ata.1	Pkmyt1	2.92457	3.3366	5.399	4.80236
chr4	132765254	132770451	uc008vci.1	Gpr3	1.92457	1.92156	4.399	4.18087
chr4	154973524	154997450	uc008wdw.1	Slc35e2	2.92457	3.50652	5.399	4.87275
chr4	115809332	115819221	uc008ugg.2	1520402A15Rik	3.60907	4.24349	6.07708	6.12429
chr4	49597377	49612742	uc008svx.2	2810432L12Rik	5.39334	5.46588	7.85844	8.13148
chr9	121274075	121354226	uc009sde.1	Trak1	2.20468	1.92156	4.66204	4.93986
chr11	116664713	116691360	uc007mmf.2	Mxra7	4.57665	4.72891	7.03127	7.19468
chr9	78461352	78564067	uc009qur.2	Cd109	5.29712	5.09148	7.7495	7.52483
chr14	55080983	55089128	uc007twd.1	Lrp10	7.73927	7.91402	10.1856	10.1791
chrX	70959935	70983626	uc009tml.1	Abcd1	4.76107	5.09148	7.20636	7.19468
chr10	89334253	90435729	uc011xlm.1	Anks1b	3.43914	4.50652	5.88443	6.00399
chr13	76006984	76083272	uc007rfy.1	Rhobtb3	4.0945	4.50652	6.53651	6.48043
chr7	25754768	25759747	uc009frd.1	Rabac1	3.54348	4.03704	5.98397	5.48043
chr5	91358221	91450395	uc008ybp.1	Mthfd2l	4.22574	4.14395	6.66204	6.28779
chr10	36853048	36860732	uc007evg.1	Marcks	8.82544	9.02659	11.2595	11.1252
chr13	96397131	96663877	uc007rmo.1	Iqgap2	4.40262	3.92156	6.83196	6.15286
chr2	91772978	91805720	uc008kxc.2	Dgkz	2.9752	3.14395	5.399	5.72836
chr4	63620818	63710049	uc008thg.2	Tnc	9.18667	9.11467	11.6065	11.7366
chr7	70587657	70903913	uc009hfl.1	Otud7a	3.11722	3.50652	5.53651	5.93986
chr18	10064398	10183790	uc008eaq.1	Rock1	4.421	4.03704	6.83196	5.60971
chr16	52249108	52455110	uc007zli.2	Alcam	3.47477	3.14395	5.88443	5.80236
chr3	58478870	58498310	uc008pia.1	Siah2	5.50092	5.50652	7.90997	8.18087
chr2	118870854	118929857	uc008lta.1	Casc5	3.84514	4.14395	6.247	5.76583
chr1	178663783	178739255	uc007due.1	Cep170	3.99986	4.24349	6.399	6.28779
chrX	20263618	20277003	uc009sto.1	Cdk16	4.20468	4.79603	6.60064	6.98823
chr9	65522354	65538107	uc009qdu.2	Oaz2-ps	4.32667	4.65852	6.72093	6.45771
chr9	34854163	34926395	uc009osm.1	St3gal4	6.19403	6.52642	8.58487	8.74253
chr1	133258602	133425938	uc007cnj.1	Srgap2	2.28714	1.3366	4.66204	4.06539
chr2	30908754	30999528	uc008jdm.2	Fnbp1	2.50953	2.92156	4.88443	4.48043
chr11	109285539	109299462	uc007mcj.1	Amz2	2.8721	3.3366	5.247	4.93986
chr17	46637553	46685337	uc008cta.1	Cul9	2.70218	2.65852	5.07708	5.12429
chr19	6452570	6482697	uc008gix.1	Nrxn2	3.40262	3.92156	5.77752	5.83798
chr13	120276063	120279191	uc007rzk.2	3110070M22Rik	1.70218	0.336596	4.07708	4.18087
chr4	117604757	117809495	uc008ujk.2	St3gal3	1.70218	2.92156	4.07708	5.12429
chr7	127984396	128047515	uc009jnb.1	Eef2k	1.70218	1.92156	4.07708	4.06539
chr19	16205320	16461943	uc008gwt.1	Gnaq	6.45707	6.14395	8.83196	8.42295
chr10	39087604	39285180	uc007evx.2	Fyn	2.02411	0.336596	4.399	4.06539
chr14	119274741	119326609	uc007uza.1	Dzip1	3.02411	3.3366	5.399	5.43463
chr18	43483880	43599891	uc008eui.2	Dpysl3	2.02411	2.65852	4.399	5.38732
chr2	25354408	25360990	uc008isk.1	Fbxw5	3.95011	3.65852	6.325	6.54652
chr3	142543458	142557608	uc008rph.1	AK035466	2.02411	1.3366	4.399	4.18087
chr5	74023987	74040970	uc008xtb.1	Sgcb	3.95011	2.65852	6.325	5.52483
chr5	151402506	151411578	uc009auf.1	BC062895	3.02411	3.3366	5.399	4.56789
chr7	51745307	51753883	uc009gpq.2	2310044H10Rik	2.02411	2.92156	4.399	4.06539
chr9	123385818	123430670	uc009sgf.2	Limd1	8.083	7.77954	10.4434	10.4273
chr1	157059600	157081870	uc007dbe.1	BC034090	4.6718	5.14395	7.03127	7.23532
chr12	76917304	77211915	uc007nxp.1	Syne2	4.421	4.3366	6.77752	6.48043
chr7	26050717	26079167	uc009fsa.2	Cic	5.50953	6.26733	7.85844	8.10248
chr10	128321601	128330774	uc007hot.1	Gdf11	4.85868	4.50652	7.20636	7.54652
chr8	74114082	74120166	uc009meb.1	Pgls	5.4301	5.76286	7.77752	8.39929
chr13	55426528	55433091	uc007qqn.1	Mxd3	6.13958	6.56541	8.48647	8.62509
chr6	86143244	86225443	uc009crk.2	Tgfa	4.43914	4.42406	6.77752	6.76583
chr7	29943847	29955666	uc009gax.1	Spred3	6.21525	6.35896	8.55281	8.53028
chr14	121432795	121682948	uc007vaa.1	Farp1	6.71713	7.0231	9.05436	9.06539
chrX	132601103	132604775	uc009uia.2	Bex2	8.48354	8.6358	10.8185	11.003
chr13	55563627	55574516	uc007qrb.2	Prr7	4.78964	5.69415	7.12147	7.65036
chr5	31594618	31600250	uc008wyd.1	Fndc4	4.78964	4.03704	7.12147	6.45771
chr18	37843053	38001526	uc008eqp.1	Pcdhga4	3.20468	2.3366	5.53651	6.06539
chr6	142770060	142914972	uc009epv.1	St8sia1	6.12284	6.21924	8.45212	8.44043
chr7	90013842	90020086	uc009idj.2	Mex3b	5.60907	6.00902	7.93506	7.65036
chr15	26470213	26827319	uc007vjn.1	Fbxl7	3.92457	3.92156	6.247	6.43463
chr4	88920376	88942523	uc008toi.1	Cdkn2a	2.92457	3.14395	5.247	5.48043
chr11	120351150	120362475	uc007mtb.2	Slc25a10	7.1059	7.34782	9.4258	9.61229
chr10	127812179	127831062	uc007hmm.1	Ankrd52	6.73927	7.16949	9.05436	9.34152
chr3	8663358	8669038	uc008oop.1	Hey1	5.31689	5.72891	7.63167	7.6996
chr6	12261607	12701253	uc009ayj.2	Thsd7a	3.6718	3.65852	5.98397	6.26179
chr17	46907583	46910356	uc008cui.1	2310039H08Rik	5.99373	6.16949	8.30589	8.60455
chr10	58682669	58689181	uc011xed.1	Ankrd57	5.83146	6.31388	8.14317	7.9067
chr8	75094001	75111183	uc009mgi.2	Tmem38a	6.89858	7.13101	9.20636	9.41117
chr16	5145201	5184027	uc012aay.1	Sec14l5	2.57665	3.79603	4.88443	5.23532
chr15	78856641	78860930	uc007wsd.1	H1f0	8.17656	8.20078	10.478	10.5771
chr18	78947116	79308130	uc008fsi.2	Setbp1	4.36514	4.79603	6.66204	6.45771
chr4	155142603	155150670	uc008weq.2	Vwa1	5.64078	5.82845	7.93506	7.95617
chr6	135146004	135186258	uc009eli.2	8430419L09Rik	5.61706	5.622	7.90997	8.01181
chr6	138087057	138105273	uc009enk.1	Mgst1	3.8721	4.03704	6.16454	6.15286
chrX	96329468	96344330	uc009tvi.1	Efnb1	6.03608	6.3366	8.325	8.41117
chr8	15009024	15033332	uc009kzk.2	Kbtbd11	6.0945	6.06452	8.38086	8.66531
chr1	75230997	75242267	uc007bon.2	Dnajb2	3.11722	3.14395	5.399	5.28779
chr4	19500213	19534079	uc008sca.2	Fam82b	2.11722	2.3366	4.399	4.72836
chr4	147234899	147244828	uc008vte.2	Miip	2.11722	2.92156	4.399	4.06539
chrX	68807167	68813829	uc009tkd.1	Hmgb3	2.11722	2.65852	4.399	4.80236
chr5	143200557	143581066	uc009aja.2	Tnrc18	4.04795	5.19458	6.325	6.52483
chr11	115624746	115660347	uc007mil.1	2310067B10Rik	6.01203	6.03704	8.28653	8.65036
chr7	31901542	31913964	uc009gie.1	Scn1b	6.32667	6.38099	8.60064	8.63525
chr19	53749795	53941570	uc008hwz.2	Rbm20	4.26696	4.3366	6.53651	6.80236
chr7	52953336	52960031	uc009gwr.1	Car11	4.50953	4.65852	6.77752	7.20835
chr2	125496835	125501378	uc008mcx.1	Eid1	7.97053	7.89884	10.2369	9.89828
chr4	43453148	43460947	uc008spq.2	Tesk1	7.53296	7.75445	9.79818	10.0235
chr16	91545338	91564252	uc007zxq.1	Ifngr2	6.4301	6.89118	8.69179	8.97229
chr10	14122390	14266842	uc007elk.1	Gpr126	4.13958	3.3366	6.399	6.15286
chr18	37909432	38001526	uc008era.1	Pcdhgb7	3.40262	3.92156	5.66204	5.48043
chr2	30835798	30878175	uc008jde.2	Usp20	6.40262	6.46588	8.66204	8.65536
chr9	48301449	48304077	uc009pii.2	Gm5617	4.81766	5.622	7.07708	7.41117
chr7	71031236	71085801	uc009hfn.2	Klf13	4.57665	5.38099	6.83196	6.48043
chr5	134573617	134617628	uc008zva.1	Gatsl2	5.43914	5.65852	7.69179	7.82028
chr8	73292079	73302611	uc009mbn.2	Pik3r2	8.47367	8.92531	10.7209	10.8046
chr15	77618620	77674545	uc007wod.1	Myh9	3.64078	4.03704	5.88443	6.06539
chr17	69765999	69790644	uc008dkv.1	AK044644	2.64078	2.65852	4.88443	4.38732
chr18	37923233	38001526	uc008erd.1	Pcdhga12	3.92457	3.3366	6.16454	5.9067
chr2	25315007	25318614	uc008ise.1	BC029214	4.74657	4.72891	6.98397	7.19468
chr7	87505335	87518012	uc009iar.1	Man2a2	3.16161	2.3366	5.399	5.93986
chr17	35958301	35969732	uc008cip.1	Flot1	7.40493	7.575	9.63932	9.51935
chr7	112700873	112706903	uc009iyg.2	Smpd1	6.0945	6.3366	8.325	8.33841
chr15	98780277	98785932	uc007xok.1	Tuba1a	12.5509	12.7634	14.781	14.7801
chr4	8068639	8168188	uc008rxv.1	Car8	4.30704	3.92156	6.53651	6.72836
chr14	78892052	78938667	uc007usi.2	Akap11	5.65637	4.92156	7.88443	7.43463
chr18	67678944	67772444	uc008fmp.1	Spire1	2.43914	2.65852	4.66204	5.38732
chr2	124925370	124951396	uc008mcc.2	Myef2	2.43914	3.14395	4.66204	4.06539
chr7	31353873	31375745	uc009gfg.1	Wbp7	2.43914	2.65852	4.66204	4.06539
chr7	116893833	116897361	uc009jee.1	DQ717888	2.43914	1.92156	4.66204	4.38732
chr8	4209542	4219312	uc012fzb.1	BC068157	2.43914	3.50652	4.66204	5.06539
chr8	108127128	108146118	uc009ndj.1	Fam65a	5.96271	6.46588	8.1856	7.93986
chr15	78890050	78895289	uc007wsj.1	Ankrd54	3.02411	4.14395	5.247	5.18087
chr2	93675609	93691933	uc008lgj.1	Accs	3.02411	3.14395	5.247	5.23532
chr9	53388626	53420455	uc009pmg.1	Acat1	7.54976	7.48634	9.77056	9.80911
chr10	60936580	61044976	uc007fgc.1	Lrrc20	5.50092	5.622	7.72093	7.82916
chr18	37872487	38001526	uc008eqt.1	Pcdhga7	4.95011	5.24349	7.16454	7.19468
chr8	4251101	4256220	uc009kto.1	Snapc2	5.15064	5.54605	7.36248	7.06539
chr7	53065496	53071248	uc009gxg.1	Cyth2	3.32667	3.92156	5.53651	4.93986
chr7	135378870	135388614	uc009jyk.1	Armc5	6.93739	7.25546	9.13236	8.98426
chr18	35987471	36021342	uc008emx.1	Cxxc5	3.78964	3.92156	5.98397	5.97228
chr2	164703586	164707276	uc008nwo.1	AK015392	5.81766	5.86016	8.00781	8.35695
chr2	25034277	25038852	uc008iqk.1	Nrarp	5.74657	6.24349	7.93506	8.32592
chr6	92876224	92895472	uc009czf.1	AK007436	3.47477	4.03704	5.66204	6.03502
chr7	30087023	30102605	uc009gbo.1	Dpf1	7.41413	7.30238	9.60064	9.87275
chr12	45368140	45414422	uc007nlq.1	Pnpla8	2.70218	3.50652	4.88443	4.38732
chr8	34494801	34527941	uc009ljy.1	Purg	2.70218	1.92156	4.88443	4.48043
chr11	120230875	120242060	uc007msm.2	2310003H01Rik	5.68707	6.14395	7.85844	8.05029
chr2	129624104	129629195	uc012cdx.1	4932416H05Rik	3.60907	4.03704	5.77752	6.31332
chr19	4445907	4479143	uc008gad.1	Syt12	3.81766	3.92156	5.98397	5.60971
chr5	141235897	141308385	uc009aih.1	Gna12	8.48463	8.83245	10.6507	10.9306
chr7	4965109	4970090	uc009ezj.1	Zfp524	5.23616	5.86016	7.399	7.6403
chrX	102992955	103126711	uc009ubb.1	Atrx	5.96271	5.82845	8.12147	7.26179
chr4	138638206	138650885	uc008vls.1	Nbl1	6.16706	6.09148	8.325	8.59937
chr2	72121693	72245558	uc008kbu.2	B230120H23Rik	6.58074	6.14395	8.73529	8.33841
chr8	67071348	67173837	uc009luw.1	Cpe	8.30333	8.10478	10.4565	10.7728
chr2	152493196	152534404	uc008ngc.2	H13	2.50953	1.92156	4.66204	4.18087
chr12	70296197	70300855	uc007nru.1	9330151L19Rik	3.92457	4.24349	6.07708	6.31332
chr18	37826758	38001526	uc008eqm.1	Pcdhga2	3.92457	3.3366	6.07708	6.15286
chr3	19125917	19213322	uc008oru.1	Pde7a	1.92457	1.3366	4.07708	4.18087
chr9	57474452	57494987	uc009pvk.1	Csk	1.92457	3.14395	4.07708	4.56789
chrX	93289383	93349378	uc009tuf.1	Msn	3.92457	3.79603	6.07708	5.43463
chr19	7490114	7500394	uc008gkz.2	2700081O15Rik	4.73193	4.92156	6.88443	6.63018
chr2	120526277	120557631	uc008lwr.1	mKIAA1300	3.73193	3.3366	5.88443	4.93986
chr4	63028161	63066479	uc008tgb.2	Akna	4.68707	5.19458	6.83196	6.72836
chr5	137969356	137976457	uc009act.1	Gnb2	10.1302	10.4294	12.2743	12.5118
chr2	25560398	25563239	uc008itg.1	Bmyc	5.02411	5.76286	7.16454	7.13864
chr14	103375797	103383854	uc007uwe.1	Kctd12	5.74657	6.24349	7.88443	7.53571
chr6	133053256	133057764	uc009ejz.2	2700089E24Rik	6.0945	5.72891	8.22682	7.71884
chr7	121556767	121681451	uc009jic.1	Pde3b	5.43914	5.14395	7.56893	7.48043
chr2	32440607	32453221	uc008jfx.1	St6galnac4	3.11722	3.14395	5.247	4.72836
chr12	112914315	112922113	uc007pdq.1	Trmt61a	4.47477	4.86016	6.60064	6.06539
chr15	102018973	102035594	uc007xuv.1	Csad	2.76107	3.50652	4.88443	5.38732
chr6	42297826	42310145	uc009brb.1	Zyx	2.76107	3.14395	4.88443	4.18087
chr2	148697467	148703204	uc008mtt.1	Cst3	8.90349	9.14395	11.0254	11.085
chr5	96800973	97213747	uc008yfk.1	Fras1	4.20468	4.72891	6.325	6.56789
chr11	3186876	3195432	uc007hsj.1	Patz1	5.73927	6.3366	7.85844	7.93164
chr11	120585859	120590595	uc007muh.1	Dcxr	3.54348	3.79603	5.66204	5.23532
chr7	5001133	5005325	uc009ezp.2	Zfp580	5.12844	5.82845	7.247	7.27485
chr11	98629248	98638556	uc007lhh.1	Nr1d1	5.68707	5.92156	7.805	7.55725
chr10	80818314	80826780	uc007gho.1	F630110N24Rik	5.93739	6.44512	8.05436	7.89828
chr1	9658915	9692290	uc007agq.1	Mybl1	5.2465	4.24349	7.36248	7.00399
chr6	47825553	47858483	uc009btl.1	Zfp282	7.05973	7.49647	9.17511	9.13507
chrX	45692534	45759905	uc009tcc.1	Bcorl1	4.8721	4.92156	6.98397	7.05029
chr2	26863485	26876609	uc008iwu.1	5930434B04Rik	3.8721	3.50652	5.98397	5.76583
chr1	182257099	182262680	uc007dwf.1	Gapdh	2.28714	2.3366	4.399	4.18087
chr12	112775065	112784964	uc007pdg.2	Eif5	2.28714	2.92156	4.399	4.65036
chr7	16502556	16509720	uc009fgp.1	Sepw1	9.81982	10.1584	11.9288	12.1462
chr7	73403632	73535227	uc009hhd.1	Lrrk1	4.49226	4.79603	6.60064	6.98823
chr15	84776149	84820401	uc007xcr.1	5031439G07Rik	8.25036	8.48125	10.3578	10.4477
chr9	56840774	56910614	uc009ptt.1	Ptpn9	7.5181	7.15677	9.62397	9.77045
chr11	71854003	71860872	uc007jxz.1	Fam64a	8.40608	8.37551	10.5117	10.7819
chr1	141349349	141390665	uc007cwh.1	Aspm	4.36514	4.14395	6.46939	6.45771
chr15	75738164	75744965	uc007whp.1	Tigd5	5.90512	6.31388	8.00781	7.96425
chr7	52149448	52155994	uc009grt.2	Fuz	4.9752	5.38099	7.07708	7.32592
chr11	50036836	50048605	uc007iry.2	Mgat4b	7.29214	7.31388	9.38996	9.46057
chr13	43633774	43657560	uc007qgf.2	Ccdc90a	4.78964	4.98045	6.88443	6.5028
chr15	74578285	74585409	uc007wfw.1	Lynx1	5.30704	5.42406	7.399	6.92338
chr16	20515136	20525376	uc007ypv.1	Dvl3	2.57665	2.3366	4.66204	4.28779
chr17	3078167	3086183	uc008aee.2	Pisd-ps2	2.57665	2.65852	4.66204	4.28779
chr2	25182969	25190091	uc008irn.1	AA543186	2.57665	3.50652	4.66204	4.65036
chr18	37883359	38001526	uc008eqv.1	Pcdhga8	3.16161	3.3366	5.247	5.23532
chr4	45420043	45423638	uc012ddn.1	9130208E07Rik	3.16161	2.92156	5.247	4.06539
chr15	68756849	68924946	uc007wbf.1	Khdrbs3	7.37931	7.31388	9.46078	9.3813
chr3	105531199	105606254	uc008qve.1	Rap1a	5.90512	6.03704	7.98397	7.23532
chr16	18220845	18237229	uc007ymx.1	Zdhhc8	7.41642	7.7203	9.49493	9.59678
chr17	34339423	34353266	uc008cbx.2	Tap2	3.99986	3.65852	6.07708	6.65036
chr17	6449604	6478265	uc008agu.2	Tmem181a	4.85868	4.42406	6.93506	7.24862
chr8	122333113	122366479	uc012glt.1	Cotl1	9.49768	9.80624	11.5729	11.7848
chr11	119204802	119218824	uc007mql.1	Sgsh	5.1725	5.14395	7.247	7.31332
chr8	19991155	20022392	uc012gak.1	6820431F20Rik	5.91163	5.79603	7.98397	7.38732
chr9	70524807	70628036	uc009qor.1	Adam10	5.32667	5.42406	7.399	7.92338
chr17	43151503	43226137	uc008cov.1	Tnfrsf21	7.22574	7.0231	9.29624	9.33218
chr4	155066580	155070592	uc008wei.1	B930041F14Rik	6.70967	7.14395	8.77752	8.92752
chr1	108066445	108290822	uc007cgv.2	Phlpp1	6.98758	6.90645	9.05436	9.15639
chr11	116264154	116276346	uc007mla.1	Rnf157	2.81766	2.92156	4.88443	4.38732
chr15	90473753	90511819	uc007xhp.1	Cpne8	2.81766	1.92156	4.88443	5.43463
chr5	116081057	116083825	uc008zeh.2	1110006O24Rik	2.81766	3.50652	4.88443	4.93986
chr7	13620586	13625327	uc009ffd.1	Ube2m	4.47477	4.50652	6.53651	6.18087
chr2	69658426	69674708	uc008jys.2	Klhl23	5.87877	5.3366	7.93506	8.28133
chr11	102049012	102055396	uc007lqt.1	G6pc3	6.54767	6.60338	8.60064	8.66034
chr14	56157102	56168854	uc007tyy.1	Pck2	3.60907	3.79603	5.66204	5.56789
chr11	58779249	58793552	uc007jcw.1	AK009977	2.02411	1.92156	4.07708	4.06539
chr2	112471538	112872488	uc008lpg.1	Ryr3	2.02411	1.92156	4.07708	4.72836
chr11	87239092	87369325	uc011yby.1	Tex14	3.02411	3.3366	5.07708	4.93986
chr15	27394431	27524662	uc007vjo.2	Ank	4.421	5.3366	6.46939	6.54652
chr7	69491162	69494813	uc009hff.1	Ndn	7.56016	7.99481	9.60846	9.88557
chr5	124454649	124484269	uc008zot.1	Vps37b	7.46594	7.92905	9.5117	9.79331
chrX	133582132	133617040	uc009ujq.2	Fam199x	4.49226	4.50652	6.53651	6.15286
chr19	7047537	7051814	uc008gjs.1	Ppp1r14b	10.836	10.9309	12.8796	13.1449
chr15	99499148	99531559	uc007xqa.1	Accn2	4.20468	4.92156	6.247	6.28779
chr9	100395421	100448472	uc009rex.1	Nck1	3.20468	3.14395	5.247	4.06539
chr19	42219878	42226193	uc008hni.2	Marveld1	7.08011	7.29079	9.12147	9.36308
chr18	34504539	34535069	uc008eki.2	Reep5	7.52873	7.7203	9.56893	9.45198
chr18	6201002	6243522	uc008dzf.2	Kif5b	6.82457	6.89118	8.85844	8.46343
chr19	32461705	32465674	uc008hfi.2	2700046G09Rik	3.95011	3.92156	5.98397	5.65036
chr17	34740805	34750394	uc008ccz.2	Agpat1	4.50953	4.14395	6.53651	6.74722
chr5	123091919	123134293	uc008zlq.1	P2rx7	5.54348	5.09148	7.56893	7.6403
chr2	179757691	179770166	uc008ohy.1	Lsm14b	4.13958	4.65852	6.16454	6.52483
chr11	78277202	78285447	uc007kjg.2	Slc46a1	6.76827	7.03704	8.79132	8.80686
chr2	35832962	35837060	uc008jla.1	DQ699740	2.64078	3.65852	4.66204	5.38732
chr4	129635617	129640764	uc008uyl.1	AK005651	2.64078	2.65852	4.66204	4.93986
chr7	17458665	17472650	uc009fij.1	Dact3	6.7861	7.42406	8.805	9.10979
chr9	54393158	54409886	uc009prf.1	Cib2	3.76107	2.92156	5.77752	6.38732
chr3	104804832	104857871	uc012cvo.1	Cttnbp2nl	2.8721	3.14395	4.88443	4.38732
chr15	81975698	82035390	uc007wyi.1	Srebf2	5.23616	5.54605	7.247	7.19468
chr14	19406090	19728141	uc007shv.1	Ube2e2	5.92457	6.06452	7.93506	8.00399
chr4	45047119	45099476	uc008ssf.2	Fbxo10	4.9752	4.98045	6.98397	7.24862
chr15	27676656	27773597	uc007vjx.1	Trio	3.07141	2.92156	5.07708	4.72836
chr17	75402868	75791109	uc008dom.1	Ltbp1	3.07141	2.92156	5.07708	4.80236
chr3	9427009	9612085	uc012cnh.1	Zfp704	3.07141	3.50652	5.07708	4.72836
chrX	9231395	9242109	uc009spy.1	Dynlt3	4.77543	5.14395	6.77752	6.48043
chr2	155972974	156007313	uc008nmq.1	Rbm39	3.40262	3.3366	5.399	4.38732
chr6	71441887	71460875	uc009cgv.1	Rnf103	5.03608	4.92156	7.03127	6.9067
chr1	43500595	43627363	uc007avo.2	Nck2	7.73376	7.86798	9.72813	9.98028
chr4	126420993	126432673	uc008utt.2	Ncdn	4.54348	4.65852	6.53651	6.12429
chr5	104935370	104951402	uc008ykm.2	BC005561	3.54348	3.50652	5.53651	4.72836
chr1	159065313	159344726	uc007ddg.2	Rasal2	6.77185	6.67645	8.76358	8.50834
chr8	13465373	13496535	uc009kya.1	Gas6	8.00444	8.08479	9.99594	10.1843
chr9	44117319	44130365	uc009pct.1	C2cd2l	4.78964	5.03704	6.77752	7.00399
chr11	5660152	5684713	uc007hxa.1	2210015D19Rik	3.99986	4.14395	5.98397	6.36307
chr5	149858803	149864868	uc009apb.1	Hmgb1	3.99986	4.14395	5.98397	5.23532
chr7	20116315	20149747	uc009fmh.1	Lrrc68	7.34122	7.45554	9.325	9.51661
chr17	8136478	8172421	uc008ait.2	Rsph3a	4.421	5.03704	6.399	6.74722
chr17	27716335	27762397	uc008bpg.1	Nudt3	9.60002	9.87381	11.5769	11.6547
chr13	58334711	58377549	uc007qtn.1	Gkap1	4.62501	4.58452	6.60064	6.00399
chr2	129093945	129124948	uc008mho.2	Ckap2l	4.68707	4.24349	6.66204	6.38732
chr1	66877426	66911841	uc007bir.1	Acadl	7.03309	7.11796	9.00781	8.96425
chrX	131289106	131295995	uc009ugo.2	Armcx3	5.46594	5.38099	7.43463	7.31332
chr8	73173009	73185580	uc009mbc.1	Pgpep1	8.18734	8.37551	10.1539	10.3291
chr16	92056566	92112472	uc007zyu.1	Mrps6	7.58889	7.42406	9.55281	9.68989
chr4	124375942	124385855	uc008uqv.2	Fhl3	6.72824	7.24349	8.69179	9.04649
chr10	61201394	61248612	uc007fgm.1	H2afy2	7.03309	7.32528	8.99594	9.14932
chr6	5214623	5250373	uc009awf.1	Pon2	5.2465	4.65852	7.20636	7.03502
chr9	22081191	22114082	uc009ooj.1	Zfp810	2.43914	1.92156	4.399	4.38732
chr9	37410882	37423199	uc009ovd.1	Spa17	2.92457	3.50652	4.88443	5.12429
chr8	89267597	89270959	uc012ghv.1	Gm10638	2.43914	2.3366	4.399	5.00399
chr11	110925477	110938139	uc007mdw.2	Kcnj2	2.11722	2.92156	4.07708	4.80236
chr2	26863485	26875091	uc008iwt.1	5930434B04Rik	2.11722	2.3366	4.07708	4.87275
chr2	155206383	155211200	uc008nkl.1	Trp53inp2	2.11722	1.3366	4.07708	4.06539
chr7	135777671	135820991	uc009jzd.1	Inpp5f	2.11722	3.14395	4.07708	4.65036
chr12	8504564	8508791	uc007mzp.1	Rhob	7.93899	8.3645	9.89725	9.9213
chrX	20238080	20260305	uc009stm.2	Uba1	5.29712	5.65852	7.247	6.68989
chr2	91295687	91354058	uc008kvx.2	Lrp4	5.21525	5.46588	7.16454	7.36307
chr7	19587413	19592112	uc009fkc.1	Irf2bp1	8.45372	8.74599	10.399	10.4288
chr6	71655853	71760696	uc009chc.1	Reep1	6.04203	5.38099	7.98397	8.29421
chr17	35224235	35239932	uc008cfq.1	Abhd16a	7.12564	7.59398	9.06576	9.31964
chr10	79372797	79381675	uc007gan.1	C030046I01Rik	7.71527	7.92156	9.6545	9.5111
chr2	27530720	27618839	uc008ixs.1	Rxra	7.40723	7.91402	9.34386	9.23198
chr3	89072167	89076492	uc008pyn.2	Slc50a1	6.69842	6.93651	8.63167	8.63525
chr14	70537975	70555598	uc007unf.1	2610301G19Rik	8.9674	9.0231	10.9004	11.0283
chr10	98568768	98575881	uc007gxj.2	Galnt4	5.70218	5.42406	7.63167	7.43463
chr5	138185223	138200975	uc009adu.1	Tsc22d4	6.45261	6.92156	8.38086	8.62509
chr6	39521874	39538768	uc009bmb.1	Adck2	5.15064	5.54605	7.07708	7.08034
chr8	124804040	124861147	uc009nsj.1	Zfpm1	5.1059	5.79603	7.03127	7.18087
chr17	27326544	27343383	uc008bfm.2	Lemd2	7.20733	7.54605	9.13236	9.37222
chr8	12393518	12399555	uc009kwa.2	Sox1	6.75384	6.82845	8.67699	8.93576
chr19	8992882	9001726	uc008gob.1	B3gat3	6.67946	6.77954	8.60064	8.59937
chr1	74436182	74443859	uc007blz.2	Ctdsp1	8.16434	8.72461	10.0827	10.2219
chr17	56408884	56418190	uc008dbm.2	Ticam1	5.33638	5.54605	7.247	7.98028
chr1	135278876	135322789	uc007cqk.1	Sox13	3.9752	4.72891	5.88443	5.9067
chr10	110941341	110945705	uc007haf.2	Phlda1	5.9752	6.622	7.88443	7.95617
chr18	37847512	38001526	uc008eqq.1	Pcdhgb2	4.49226	4.14395	6.399	6.97228
chr15	27660403	27957603	uc007vjw.1	Trio	7.1144	7.11796	9.01959	9.17392
chr3	95983149	95999103	uc008qmf.1	Sv2a	5.083	5.29079	6.98397	7.45771
chr6	113431562	113443332	uc009dgo.1	Creld1	6.46151	6.82845	8.36248	8.2219
chr11	98249985	98263804	uc007lgh.1	Pgap3	4.98758	5.14395	6.88443	7.32592
chr5	23466753	23538501	uc008wqv.1	Fam126a	5.64078	5.46588	7.53651	7.13864
chr7	4640529	4667599	uc009eyf.1	Brsk1	6.27203	6.64038	8.16454	8.56789
chr11	97193422	97215387	uc007ldy.1	Gpr179	2.50953	2.3366	4.399	4.48043
chr7	19659548	19668124	uc012fax.1	Dmwd	4.43914	4.50652	6.325	6.97228
chr7	135665096	135690493	uc009jzb.2	Bag3	6.60103	6.82845	8.48647	8.51385
chr7	16534335	16554884	uc009fgt.1	Ehd2	6.98758	7.21924	8.87149	9.09514
chr14	57428825	57432736	uc007ucq.1	2410022M11Rik	4.36514	4.03704	6.247	6.20835
chr2	156544720	156590099	uc008nnu.1	Dlgap4	4.36514	4.72891	6.247	6.56789
chr11	74662765	74712582	uc007kck.1	Sgsm2	6.90512	6.95131	8.77752	9.05408
chr11	31768878	31773074	uc007iip.1	Cpeb4	3.78964	3.65852	5.66204	5.83798
chr2	25108958	25111872	uc008iqz.1	Tmem203	5.01203	5.82845	6.88443	7.44622
chr13	77182348	77276729	uc007rgs.2	Ankrd32	4.11722	3.65852	5.98397	5.18087
chr3	89232182	89239050	uc008pzo.1	Pygo2	4.11722	4.50652	5.98397	6.23532
chr7	53698528	53897177	uc009gyp.2	Sergef	5.70218	5.89118	7.56893	7.28779
chr12	70684747	70784839	uc007nso.2	Sos2	4.91163	4.3366	6.77752	6.92338
chr8	74232285	74251580	uc009met.2	Fcho1	5.421	5.86016	7.28653	7.28779
chr11	116667890	116691360	uc007mmg.1	Mxra7	3.6718	4.03704	5.53651	5.9067
chr10	61156261	61165521	uc007fgh.2	Tysnd1	7.931	8.41341	9.79132	10.0408
chr1	59819480	59927703	uc007bdz.1	Bmpr2	5.91812	5.92156	7.77752	7.54652
chr9	74917012	75071494	uc009qrr.1	Myo5a	5.46594	5.46588	7.325	6.54652
chr10	31221692	31331531	uc007etu.2	Rnf217	4.80372	4.86016	6.66204	7.00399
chr12	16899783	16995080	uc007nch.1	Rock2	3.54348	3.92156	5.399	5.00399
chr5	144062750	144079039	uc009ajy.2	E130309D02Rik	8.19403	8.31959	10.0486	10.0541
chr17	4993073	5347656	uc008aey.1	Arid1b	7.2695	7.55576	9.12147	8.89828
chr11	69823693	69830909	uc007jto.1	Acadvl	8.52129	8.35896	10.3671	10.5235
chr17	34116436	34122303	uc008cao.1	AA388235	4.40262	4.14395	6.247	5.9067
chr9	44494390	44545277	uc009peh.1	Phldb1	2.81766	2.92156	4.66204	5.48043
chr10	9475344	9622838	uc007eiz.2	Stxbp5	3.40262	3.92156	5.247	5.52483
chr7	52067625	52074028	uc012fju.1	Atf5	3.40262	3.3366	5.247	5.38732
chr19	5086552	5092856	uc008gcd.1	Yif1a	7.84173	8.0577	9.68441	9.75888
chr11	116058168	116076632	uc007mkn.2	2310004N24Rik	6.96271	6.77954	8.805	8.45771
chr18	9210853	9216199	uc008eag.2	Fzd8	5.23616	5.03704	7.07708	7.42295
chr15	77989892	78006538	uc007wor.1	Ift27	6.32667	6.52642	8.16454	8.31964
chr3	87944316	87973562	uc008puc.1	Mef2d	4.32667	4.86016	6.16454	6.03502
chr13	31911454	32432413	uc007pzq.1	Gmds	4.49226	4.58452	6.325	5.48043
chr11	59951583	60005527	uc007jfl.1	Rai1	3.2465	3.50652	5.07708	4.48043
chr1	137041410	137052845	uc007csu.1	Arl8a	8.01959	8.24949	9.84526	9.93986
chr7	119367349	119498708	uc009jgn.2	Mical2	6.55601	6.40269	8.38086	8.31964
chr2	165898588	165982785	uc008nyk.1	Sulf2	3.57665	4.3366	5.399	5.28779
chr3	20021969	20056995	uc008oso.1	Gyg	6.36514	6.16949	8.1856	8.10979
chr13	51940043	51943843	uc007qmq.2	Gadd45g	6.01203	6.622	7.83196	8.31332
chr1	173431608	173434881	uc007dop.1	Refbp2	4.34603	4.24349	6.16454	6.43463
chr16	17206227	17214075	uc007ykn.2	Rimbp3	5.34603	5.82845	7.16454	7.23532
chr11	71562877	71574470	uc007jxx.1	Wscd1	3.84514	3.65852	5.66204	5.52483
chr5	144223360	144265310	uc009akj.1	Daglb	6.76827	6.89118	8.58487	8.71884
chr16	17925303	17930312	uc007ymp.2	Slc25a1	9.37401	9.64721	11.1804	11.3638
chr2	25428950	25432391	uc008isp.1	Phpt1	7.20202	7.15677	9.00781	9.10614
chr9	103012403	103087600	uc009rgf.1	Rab6b	5.31689	5.3366	7.12147	6.93986
chr14	20894857	20904394	uc007siy.2	1810063B07Rik	5.91812	6.00902	7.72093	7.74722
chr2	17965713	17972076	uc008ill.1	2810030E01Rik	4.36514	4.24349	6.16454	6.06539
chr4	155603152	155610966	uc008wgs.2	Klhl17	4.80372	4.86016	6.60064	7.36307
chr12	110270391	110308427	uc007pal.1	Begain	3.28714	3.65852	5.07708	5.12429
chr9	20678252	20686154	uc009ojj.1	Angptl6	4.98758	5.24349	6.77752	6.63018
chr9	108684126	108700319	uc009rqu.1	AK057615	2.28714	2.3366	4.07708	4.38732
chr17	26010444	26014108	uc008bcl.2	0610011F06Rik	6.71341	7.06452	8.50334	8.25522
chr9	108205288	108210282	uc009rpd.1	Tcta	5.60907	5.622	7.399	7.24862
chrX	70161859	70203867	uc009tkv.1	Nsdhl	8.11722	7.95131	9.90362	9.78877
chr3	87860444	87864417	uc008ptu.1	Apoa1bp	8.27077	8.41341	10.0544	10.2101
chr3	98117093	98145892	uc008qps.1	Phgdh	11.1093	11.2314	12.8909	13.0247
chr2	90273045	90422804	uc008ksv.2	Ptprj	5.384	5.03704	7.16454	6.48043
chr2	122174627	122196654	uc008mar.1	Shf	5.29712	5.03704	7.07708	7.19468
chr5	22938246	23010047	uc008wqa.2	Mll5	4.20468	4.14395	5.98397	5.56789
chr3	88897509	88907867	uc008pxo.1	Fdps	10.5136	10.4723	12.2914	12.4466
chr2	178145911	178151177	uc008ohp.1	Ppp1r3d	3.76107	3.92156	5.53651	5.80236
chr17	56315963	56325343	uc008dbg.1	D17Wsu104e	8.46373	8.55092	10.2369	10.3415
chr4	154622074	154630796	uc008wdb.2	2610002J02Rik	3.47477	3.92156	5.247	5.65036
chr9	25058168	25116150	uc009opk.1	2017-09-07	6.5181	6.21924	8.28653	7.88982
chr9	57103398	57112406	uc009pus.2	1700017B05Rik	3.11722	3.3366	4.88443	5.00399
chr8	73121388	73134213	uc009max.2	Ssbp4	5.01203	5.38099	6.77752	7.3508
chr6	83862346	83936865	uc009con.2	Zfml	4.56016	4.03704	6.325	5.87275
chr11	115351739	115355128	uc007mhu.1	Nt5c	8.27835	8.55576	10.0429	10.2519
chr8	73219637	73224515	uc009mbe.2	Jund	9.31873	9.79808	11.0827	11.2974
chr11	52207929	52222225	uc007ivo.1	9530068E07Rik	8.06558	8.06452	9.82527	9.63778
chr15	88972913	88982036	uc007xfp.2	Mapk11	6.10021	6.48634	7.85844	8.20153
chr13	47118911	47140586	uc007qhq.2	Tpmt	2.64078	2.3366	4.399	4.72836
chr8	38054628	38058587	uc009llx.2	AI429214	2.64078	2.3366	4.399	4.80236
chr17	57032033	57076811	uc008ddk.1	Mllt1	8.42555	8.40806	10.1804	10.4346
chr5	129104980	129109968	uc008zsh.1	Fzd10	7.20733	7.58452	8.95972	9.09514
chr11	3997042	4020732	uc007huh.1	Sec14l2	5.71713	6.09148	7.46939	7.55725
chr5	42016214	42101394	uc008xha.1	Rab28	5.71713	5.54605	7.46939	6.92338
chr4	104827951	104905372	uc008tye.1	Ppap2b	7.8721	7.98045	9.62397	9.67272
chr19	4035410	4039912	uc008fyf.1	Gstp1	8.13402	8.26141	9.88443	9.96425
chr2	128522732	128627924	uc008mgt.1	Mertk	3.32667	3.79603	5.07708	5.28779
chr3	110049027	110055916	uc008rat.2	Prmt6	4.85868	4.58452	6.60064	5.9067
chr4	33114113	33120298	uc008sfo.2	4933421O10Rik	3.50953	4.03704	5.247	5.18087
chr4	126112256	126147665	uc008utj.2	Eif2c1	2.92457	3.79603	4.66204	5.12429
chr5	67997121	68003511	uc008xpy.1	Shisa3	3.50953	3.79603	5.247	5.43463
chr10	77439394	77448183	uc007fwn.1	1810043G02Rik	4.80372	5.24349	6.53651	6.67026
chr7	25370561	25393944	uc009fqb.1	Ethe1	6.95957	7.35896	8.69179	8.44622
chr12	88447815	88490852	uc007oij.1	Pomt2	7.77364	7.55576	9.50334	9.63778
chr17	45797125	45825167	uc012auh.1	Tmem63b	9.16502	9.32812	10.8941	11.0813
chr4	10799644	10826570	uc012dam.1	2610301B20Rik	5.8107	5.79603	7.53651	7.26179
chr4	98603355	98789606	uc008tuq.1	Dock7	4.93739	4.72891	6.66204	6.98823
chr19	7014344	7026383	uc008gjn.1	Bad	3.16161	3.65852	4.88443	5.33841
chr15	79591878	79606897	uc007wuj.2	Dnalc4	4.26696	4.65852	5.98397	6.31332
chr8	86494876	86520344	uc009mll.2	Prkaca	8.96818	9.01608	10.6844	10.913
chr15	79961583	79992132	uc007wve.1	Tab1	7.40954	7.56541	9.12147	9.34771
chr16	8468905	8490290	uc007ycl.1	BC024814	6.47916	6.60338	8.1856	8.05786
chr6	48012393	48038592	uc009btv.2	Zfp746	7.28964	7.52642	8.99594	8.91922
chr2	31099442	31150991	uc008jdq.1	Ncs1	7.98604	7.97322	9.69179	10.002
chr4	94279210	94359924	uc008tsg.1	Ift74	4.54348	4.58452	6.247	5.80236
chrX	165092049	165113834	uc009uxh.1	Msl3	4.28714	3.65852	5.98397	5.65036
chr2	130243419	130252437	uc008miu.2	Fam113a	2.70218	2.92156	4.399	5.18087
chr6	29119229	29131584	uc009bcz.2	Prrt4	2.70218	2.3366	4.399	4.38732
chr11	68871276	68875078	uc007jpb.1	2310047M10Rik	6.18868	6.67645	7.88443	8.36917
chr2	164702867	164716937	uc008nwp.1	Pcif1	8.02561	8.34222	9.72093	9.86629
chr19	5099206	5108996	uc008gcf.1	Rab1b	10.1055	10.2314	11.7965	11.8549
chr3	55429119	55989623	uc008pgu.2	Nbea	5.5181	4.65852	7.20636	7.49166
chr6	28371639	28376499	uc009bcq.1	Arf5	8.69464	9.03704	10.3809	10.585
chr17	34051120	34056270	uc008cac.1	Zbtb22	7.8721	8.38099	9.55281	9.57583
chr8	127432486	127475154	uc012gna.1	Egln1	7.78077	7.60338	9.46078	9.87275
chr19	10945151	10958233	uc008gre.1	Tmem109	7.597	7.83644	9.27675	9.19124
chr8	108240012	108284507	uc009neb.1	Gfod2	7.13958	7.24349	8.81854	9.06539
chr4	139582766	139804726	uc008vmu.2	Igsf21	5.56843	5.42406	7.247	7.27485
chr3	52843468	53065601	uc008pep.1	Lhfp	4.30704	4.58452	5.98397	5.60971
chr17	35792579	35806537	uc012arq.1	Vars2	4.98758	5.46588	6.66204	6.63018
chr2	29656199	29673042	uc008jaf.1	Slc27a4	8.32423	8.53135	9.99594	10.1599
chr3	94810623	94821160	uc008qhp.1	Zfp687	4.57665	5.29079	6.247	6.58896
chr8	74021651	74037668	uc009mdp.2	Plvap	6.16161	6.58452	7.83196	7.93164
chr2	18592088	18597843	uc008ilx.1	Commd3	7.08011	7.30238	8.7495	9.13148
chr1	64079441	64084160	uc007bgn.1	AK150559	4.65637	5.03704	6.325	6.09514
chr10	7398768	7402956	uc007eie.2	BC020402	3.73193	2.92156	5.399	5.43463
chr4	141100076	141104228	uc008vor.2	B330016D10Rik	3.73193	3.3366	5.399	6.48043
chr7	13620586	13625619	uc012ezf.1	Ube2m	4.80372	5.58452	6.46939	6.97228
chr17	26000642	26007683	uc008bck.1	Fam195a	5.93739	5.82845	7.60064	7.94804
chr16	55973380	55976730	uc007zlw.2	2310061J03Rik	3.99986	3.92156	5.66204	6.06539
chr16	31947136	31950607	uc007yxy.2	0610012G03Rik	7.65831	7.8042	9.31548	9.34462
chr2	114019196	114029168	uc008lqj.2	Zfp770	6.00596	6.09148	7.66204	7.08034
chr16	85794072	85805360	uc012aho.1	Adamts1	6.23096	6.00902	7.88443	8.36917
chr11	58968870	58979244	uc007jdd.1	A230051G13Rik	6.49226	6.82845	8.14317	8.04267
chr5	137382019	137389114	uc009abc.1	Rabl5	6.10021	6.31388	7.7495	8.24198
chr3	96042038	96045050	uc008qmk.1	Hist2h3c1	10.9074	11.5696	12.5528	12.5831
chr10	77899491	77929693	uc007fxu.2	Pdxk	8.42555	8.46588	10.0658	10.1529
chr5	123206288	123231419	uc008zmd.2	Camkk2	2.43914	1.92156	4.07708	5.12429
chr5	123207551	123231419	uc008zme.2	Camkk2	3.43914	2.92156	5.07708	5.60971
chr8	123010765	123105283	uc009nqz.2	Gse1	2.43914	1.92156	4.07708	4.18087
chr17	80771196	80774882	uc012axt.1	Gm10190	2.43914	2.3366	4.07708	4.28779
chr2	84636984	84650160	uc012byn.1	Ube2l6	6.16706	6.29079	7.805	7.51385
chr9	18258497	18280003	uc012gor.1	Zfp558	2.43914	2.65852	4.07708	4.48043
chr14	14843004	14939815	uc007sgi.2	Atxn7	5.6486	5.03704	7.28653	6.92338
chr14	73762038	73787078	uc007upt.1	Itm2b	4.76107	5.50652	6.399	6.88982
chr15	31370964	31385444	uc007vkg.1	Ropn1l	2.76107	2.92156	4.399	4.38732
chr5	140182646	140214287	uc009agx.2	Micall2	2.76107	2.65852	4.399	4.18087
chr4	115746069	115769648	uc008ufy.1	Lrrc41	7.87377	7.77954	9.5117	9.72836
chr9	45818902	46032277	uc009pgz.2	Sik3	6.39334	6.56541	8.03127	8.05029
chr10	80991476	81009791	uc007gil.1	Gna11	7.46373	7.74599	9.09944	9.32278
chr11	98271797	98299030	uc007lgi.1	Erbb2	6.85531	6.72891	8.48647	8.77964
chr13	111183251	111191051	uc007rvs.2	Plk2	9.57511	9.37825	11.2038	11.2854
chr10	79130154	79138871	uc007fzh.1	Gm16517	7.1967	7.79603	8.81854	9.10248
chr11	118254065	118265245	uc007moz.1	Lgals3bp	4.36514	4.03704	5.98397	5.97228
chr11	77342663	77423317	uc007khc.1	Taok1	7.94535	7.63122	9.56089	9.15991
chr19	29788891	29882499	uc008hdy.2	9930021J03Rik	5.1059	4.03704	6.72093	6.80236
chr8	96495487	96538540	uc009mvn.1	Amfr	9.48135	9.39459	11.0939	11.1774
chr18	35426049	35660579	uc008emc.2	Sil1	6.2465	6.11796	7.85844	8.33218
chr4	26251652	26275799	uc008sej.1	Manea	5.32667	5.38099	6.93506	6.56789
chr2	52714901	52993236	uc008jrh.1	Fmnl2	5.27709	5.14395	6.88443	6.97228
chr2	155643467	155646939	uc008nlk.2	BC029722	6.25164	6.24349	7.85844	7.9067
chr10	127838450	127848852	uc007hmq.1	Obfc2b	8.55808	8.84042	10.1645	10.1791
chr5	137755785	137776810	uc009ace.2	Slc12a9	6.33153	6.44512	7.93506	8.39929
chr2	167512414	167515918	uc008oaf.1	Cebpb	6.08876	6.622	7.69179	8.17392
chr15	80842710	81023187	uc007wwd.1	Mkl1	3.47477	3.3366	5.07708	4.80236
chr8	130880972	131029375	uc009nzt.2	Nrp1	4.47477	4.03704	6.07708	6.03502
chr6	90963060	91068820	uc009cxu.2	Nup210	6.95327	6.58452	8.55281	8.82473
chr17	32257837	32305797	uc008bvx.1	Notch3	7.58686	7.8523	9.1856	9.55189
chr11	121038906	121067962	uc007mvk.1	1110031I02Rik	5.28714	5.69415	6.88443	6.92338
chr15	76476196	76492538	uc007wlf.1	Cyhr1	6.58889	7.03704	8.1856	8.28779
chr1	52512692	52559292	uc007ayh.2	Nab1	5.76827	5.95131	7.36248	7.46912
chr3	89048359	89053644	uc008pyl.1	Krtcap2	8.45484	8.56541	10.0486	10.0988
chr15	79487656	79498090	uc007wuc.1	Cby1	7.86876	7.95865	9.46078	9.66778
chr9	107953489	107958032	uc009rom.1	Amigo3	4.07141	4.3366	5.66204	6.03502
chr19	56469618	56516833	uc008hyw.1	Casp7	4.57665	4.72891	6.16454	5.76583
chr14	70184796	70207352	uc011znx.1	Rhobtb2	7.29712	7.3366	8.88443	9.03118
chr17	34157736	34163625	uc008cas.2	Ring1	5.73927	6.03704	7.325	7.6403
chr10	23514791	23547774	uc007eqa.2	1110021L09Rik	5.49226	5.72891	7.07708	7.12429
chrX	33866403	33906851	uc009sxn.1	Lonrf3	4.49226	3.92156	6.07708	5.52483
chr8	97360316	97378795	uc009mxd.1	Coq9	8.34483	8.71164	9.92883	10.1043
chr1	132950280	132996120	uc007cmv.1	Mapkapk2	9.35143	9.4425	10.9351	11.0177
chr19	6059206	6062468	uc008ggv.1	Znhit2-ps	7.57049	7.95865	9.15389	9.39631
chr5	149858803	149865026	uc009apc.1	Hmgb1	2.81766	3.14395	4.399	4.18087
chr10	78527118	78562345	uc007fyo.2	2610008E11Rik	3.6718	1.92156	5.247	5.33841
chr3	69118839	69359318	uc008pmg.1	Ppm1l	3.6718	3.65852	5.247	5.72836
chr7	4099784	4103474	uc009exd.1	Leng9	3.6718	3.79603	5.247	5.18087
chr10	126975213	127060204	uc007hjx.1	Lrp1	8.42783	8.99123	10.0019	9.946
chr18	37904841	38001526	uc008eqz.1	Pcdhga10	4.96271	4.03704	6.53651	6.83798
chr7	117451526	117760434	uc009jfe.2	Sbf2	4.20468	4.24349	5.77752	6.23532
chr7	106302172	106333223	uc009ile.1	Dgat2	6.15064	6.16949	7.72093	7.71884
chr1	13172364	13364520	uc007aiq.1	Ncoa2	2.50953	2.3366	4.07708	4.28779
chr10	80808790	80815114	uc007ghj.2	Hmg20b	2.50953	2.65852	4.07708	4.65036
chr11	74487450	74539360	uc007kce.2	Pafah1b1	4.0945	4.14395	5.66204	5.56789
chr10	80949203	80961108	uc007gig.1	Ncln	9.21722	9.79398	10.781	11.0455
chr10	40601339	40658375	uc007exi.2	Wasf1	5.8721	6.35896	7.43463	7.28779
chr8	121968618	121996535	uc009npq.1	Necab2	6.64469	6.96595	8.20636	7.94804
chr5	73713437	73731878	uc008xsw.1	Ociad2	4.68707	4.24349	6.247	5.97228
chr17	36001559	36012541	uc008civ.2	2310014H01Rik	4.60907	3.79603	6.16454	5.56789
chr18	24111188	24123171	uc008egh.1	Zfp397	5.384	4.42406	6.93506	6.70925
chr11	77321600	77328775	uc007kgz.1	Trp53i13	5.65637	6.24349	7.20636	7.09514
chr16	3882618	3904781	uc007xyw.1	Nat15	5.8854	6.06452	7.43463	7.24862
chr10	127800152	127809093	uc007hmk.1	Coq10a	6.083	5.622	7.63167	7.52483
chr10	98723864	98730123	uc007gxk.2	Dusp6	11.3492	11.615	12.8973	12.9218
chr5	117732659	117739573	uc008zfl.1	Pebp1	11.7012	11.8179	13.2483	13.5011
chr17	78597587	78775932	uc008dou.2	Crim1	6.46151	6.56541	8.00781	7.80236
chr12	112810531	112814613	uc007pdj.1	AK012841	3.11722	2.65852	4.66204	5.06539
chr15	77636892	77674545	uc007woe.1	Myh9	3.70218	3.79603	5.247	5.72836
chr5	31214158	31223646	uc008wwm.1	Emilin1	4.85868	4.98045	6.399	6.09514
chr4	151380999	151391786	uc008vyy.1	Klhl21	7.68707	7.98765	9.22682	9.44043
chr12	109444554	109515627	uc011yrs.1	Ccdc85c	6.89529	7.35896	8.43463	8.66531
chr6	108608622	108616919	uc009ddn.1	Bhlhe40	8.15751	8.40269	9.69179	9.77045
chr9	26904968	26964965	uc009oqj.1	Jam3	6.37931	6.40269	7.90997	7.93986
chr19	57683523	58207830	uc008iai.2	Atrnl1	5.50092	5.46588	7.03127	7.2219
chr5	118514989	118607467	uc008zge.1	Fbxw8	9.41069	9.64948	10.9382	11.136
chr7	31106427	31109394	uc009ged.1	Sdhaf1	7.49226	7.59398	9.01959	9.23866
chr7	151764227	151770341	uc009kql.1	Fadd	6.33153	6.42406	7.85844	7.95617
chr11	76013557	76021759	uc007kfg.2	Fam57a	4.8721	5.19458	6.399	6.93986
chr4	44046946	44087545	uc008srn.2	Gne	2.8721	2.65852	4.399	4.56789
chr5	25033835	25037284	uc012dtm.1	1700096K18Rik	3.8721	3.79603	5.399	5.06539
chr14	21542951	21555784	uc007sks.1	Ndst2	7.09163	7.00902	8.61623	8.72361
chr2	154412779	154431409	uc008njm.1	Pxmp4	5.64078	5.65852	7.16454	7.56789
chrX	148448970	148496516	uc009upx.2	Smc1a	5.76827	5.42406	7.28653	7.3993
chr7	89026141	89081345	uc009icr.1	Hdgfrp3	5.083	5.03704	6.60064	6.26179
chr3	30689797	30720185	uc008ovh.1	Sec62	5.8854	5.89118	7.399	7.2219
chr6	118411967	118431291	uc009dlq.1	Zfp9	4.02411	3.3366	5.53651	5.80236
chr4	131825993	131828101	uc008vaw.1	Rnu11	7.12003	6.71164	8.63167	8.82028
chr2	155060268	155076013	uc008nkg.2	Dynlrb1	8.95405	9.06791	10.4651	10.1757
chr8	106862493	106871572	uc009nam.1	Cmtm3	7.07722	7.16949	8.58487	8.21514
chr19	5795689	5804671	uc008gfj.2	Malat1	12.4571	12.3174	13.9612	13.7386
chr11	76590709	76662510	uc007kga.1	Cpd	7.09736	6.65852	8.60064	8.59937
chr8	119778918	119970088	uc009noz.2	4933407C03Rik	3.16161	3.14395	4.66204	4.28779
chr17	21702009	21725649	uc008arc.1	Zfp948	3.57665	3.65852	5.07708	4.93986
chrX	71548350	71557206	uc009tom.2	Gdi1	8.98218	8.99123	10.4822	10.4972
chr8	86174576	86188688	uc009mkr.1	Gipc1	9.29837	9.65852	10.7982	10.8717
chr2	32249409	32258260	uc008jfm.2	Ptges2	7.78964	8.39188	9.28653	9.58372
chr19	8843485	8846965	uc008gms.1	Tmem223	8.00291	8.18834	9.49493	9.60971
chr5	22937988	22942044	uc008wpy.1	BC050254	5.94376	6.00902	7.43463	7.44622
chr10	80083524	80103516	uc007gea.2	Csnk1g2	4.04795	4.65852	5.53651	6.03502
chr4	59046027	59054771	uc008szp.1	Gng10	6.77899	6.95131	8.2669	7.89828
chr2	179709557	179713718	uc008ohx.1	4921531C22Rik	3.76107	2.65852	5.247	5.48043
chr9	21867840	21877789	uc009onq.1	Zfp653	3.76107	3.92156	5.247	5.33841
chr17	35185187	35195664	uc008cfg.1	Clic1	9.23875	9.40537	10.7245	10.7796
chr14	32452242	32481383	uc007sxy.2	Btd	6.72084	6.86016	8.20636	8.38732
chr19	5850973	5877208	uc008gfn.1	Frmd8	9.22181	9.24949	10.7064	10.7785
chr7	13389126	13406209	uc009feh.1	Zfp329	3.40262	2.65852	4.88443	4.28779
chr5	130088088	130114086	uc008zsy.1	Mmp17	6.37931	6.64038	7.85844	7.6996
chr8	74762030	74781278	uc009mfp.1	Ap1m1	9.14512	9.48125	10.624	10.7129
chr11	75832696	75843284	uc007kez.2	Fam101b	4.1833	4.42406	5.66204	5.9067
chr7	86416151	86506487	uc009hyc.1	Abhd2	7.88374	7.67645	9.36248	9.47479
chr17	45678888	45688626	uc008cqu.2	Tmem151b	6.32667	6.24349	7.805	7.89828
chr2	155100179	155103809	uc012cha.1	Map1lc3a	7.54348	7.8523	9.01959	9.16693
chr11	59548573	59594362	uc007jer.2	Mprip	2.92457	2.3366	4.399	4.18087
chr17	22097525	22131333	uc008arm.2	Zfp943	2.92457	1.3366	4.399	4.18087
chr12	28019132	28029583	uc007nfn.2	Sox11	8.77275	8.95131	10.242	10.1739
chr16	78299935	78340996	uc007zsn.1	Cxadr	6.81766	6.56541	8.28653	7.80236
chr12	87156404	87167495	uc007ohf.1	0610007P14Rik	7.96584	8.07806	9.43463	9.23532
chr4	33332397	33337762	uc008sfu.1	Pnrc1	8.23226	8.39729	9.69913	9.44622
chr7	16703224	16712865	uc009fgy.2	Kptn	6.36514	6.67645	7.83196	7.78421
chr5	124795447	124806637	uc008zpo.1	Cdk2ap1	11.3818	11.3707	12.8486	12.9083
chr5	37198051	37223888	uc008xfb.2	Man2b2	4.85868	5.46588	6.325	6.33841
chr8	108463450	108469302	uc009neq.2	Lcat	4.07141	3.50652	5.53651	5.23532
chr13	21878694	21881087	uc007prk.1	Hist1h2an	8.34724	8.91024	9.805	9.93164
chr13	54674373	54682489	uc007qoj.2	Arl10	6.20468	6.50652	7.66204	8.35695
chr14	58141665	58162003	uc007udc.1	Il17d	5.66411	5.98045	7.12147	6.85547
chr14	58535116	58620099	uc007udv.1	Efha1	5.66411	5.19458	7.12147	7.23532
chr11	102013860	102019721	uc007lqr.2	Tmem101	7.9783	8.05084	9.43463	9.533
chr15	85034437	85082310	uc007xdb.2	Fbln1	4.62501	4.24349	6.07708	6.06539
chr14	65670895	65718943	uc007uix.2	Extl3	9.02185	9.11796	10.4737	10.4917
chr7	63233853	63276943	uc009hdu.1	Nipa1	4.32667	4.92156	5.77752	6.18087
chr19	29095321	29124392	uc008hcx.1	Ak3	7.7967	7.56541	9.247	9.20495
chr6	55151376	55270216	uc009cap.1	Fam188b	3.95011	3.50652	5.399	5.76583
chr7	4969977	4984825	uc009ezk.1	Zfp865	3.95011	4.24349	5.399	5.68989
chr12	106268898	106279120	uc007oxu.1	Glrx5	8.51703	8.73748	9.96582	9.98823
chr5	143720033	143734868	uc009ajl.1	Fscn1	11.5136	11.8234	12.9612	13.127
chr12	72114953	72200338	uc007nud.1	Arid4a	3.43914	3.50652	4.88443	4.48043
chr5	23897973	23915765	uc008wrh.1	Abcb8	4.0945	4.3366	5.53651	5.56789
chr16	38900457	39027270	uc007zfp.1	Igsf11	4.54348	4.3366	5.98397	5.68989
chr11	68022865	68202328	uc007jnm.1	Ntn1	9.41871	9.66751	10.8584	11.1143
chr3	134873526	134936504	uc008rkz.1	Cenpe	5.8854	5.79603	7.325	7.06539
chrX	54639206	54648213	uc009thh.2	Gm7324	2.64078	2.92156	4.07708	4.06539
chr4	94608731	94647791	uc008tsn.1	Mysm1	4.64078	4.86016	6.07708	5.9067
chr10	98375785	98488777	uc007gxf.2	Atp2b1	6.13402	5.69415	7.56893	7.99613
chr15	76529971	76534669	uc007wlt.1	Mfsd3	5.28714	5.69415	6.72093	6.78421
chr11	69792669	69804102	uc007jtf.1	Ctdnep1	7.83318	7.99481	9.2669	9.28779
chr4	135474640	135496215	uc008vhi.2	Fuca1	8.63292	8.60338	10.0658	10.4448
chr9	106268962	106278054	uc009rjm.2	Dusp7	7.90185	8.27911	9.33446	9.59417
chr2	25438537	25465966	uc008isr.1	B230208H17Rik	6.47916	6.77954	7.90997	8.08776
chr4	155363574	155368787	uc008wfq.1	B3galt6	7.32179	7.44512	8.7495	8.79331
chr8	108422373	108455702	uc009nen.1	Pskh1	8.21261	8.29079	9.63932	9.67026
chr17	35270836	35283298	uc008cgf.1	Bat3	2.9752	2.3366	4.399	4.72836
chr19	45061833	45077885	uc008hqf.1	Sema4g	3.9752	3.79603	5.399	5.93986
chr9	108474643	108483001	uc009rqj.1	Wdr6	10.7826	10.8073	12.2064	12.4211
chr5	111758757	111761564	uc012ebe.1	AK039279	2.9752	2.92156	4.399	4.06539
chr5	137460888	137472516	uc009abk.2	Plod3	7.43914	7.66751	8.85844	8.89406
chr2	130479818	130492381	uc008mjs.1	Ddrgk1	7.66988	7.87575	9.0883	9.2453
chr9	30232913	30274311	uc009oqy.1	Snx19	7.61307	7.49647	9.03127	8.99218
chr9	44055394	44061547	uc009pch.1	Pdzd3	3.2465	3.79603	4.66204	6.03502
chr5	114881042	114896036	uc008yzo.1	Mmab	6.30704	6.14395	7.72093	7.57846
chr13	85354303	85431091	uc007rix.2	Rasa1	4.91163	4.86016	6.325	6.23532
chr4	147241087	147244467	uc008vtf.1	Fv1	4.91163	4.92156	6.325	6.03502
chrX	78313982	78343214	uc009tre.2	Tmem47	5.66411	5.46588	7.07708	7.26179
chr17	46683787	46695111	uc008ctg.1	Srf	8.76107	9.19146	10.1698	10.1422
chr15	99554048	99558567	uc007xqe.2	2310016M24Rik	7.62501	7.35896	9.03127	9.18434
chr7	141860369	142365330	uc009kdv.1	Dock1	5.71713	5.24349	7.12147	6.85547
chr15	89202067	89209468	uc007xgl.2	Tymp	7.58074	7.73748	8.98397	9.23532
chr5	138218145	138221335	uc009adx.1	2010007H12Rik	6.95957	7.15677	8.36248	8.72361
chr8	73298760	73301505	uc009mbo.2	2010320M18Rik	6.40262	6.622	7.805	8.10979
chr15	100218330	100255486	uc007xrc.2	Slc11a2	3.84514	4.03704	5.247	5.43463
chr5	37635030	37683372	uc008xfm.1	Crmp1	3.99986	3.79603	5.399	5.12429
chr1	95580270	95592339	uc007cee.1	Bok	7.62104	7.61272	9.01959	9.28779
chr7	31740427	31746638	uc009ghi.1	AK154275	4.26696	3.79603	5.66204	6.36307
chr19	9186208	9212056	uc008gon.1	Asrgl1	8.45707	8.53135	9.85186	10.1791
chrX	99479978	99702487	uc009typ.1	Hdac8	4.384	4.24349	5.77752	5.23532
chr4	137869324	137884211	uc008vku.1	Pink1	6.52661	6.19458	7.90997	8.28133
chr2	30091288	30119310	uc008jbu.2	Lrrc8a	8.89365	9.08479	10.2767	10.533
chr4	147283861	147312885	uc008vtk.2	Plod1	7.75384	8.0577	9.13236	9.21175
chr10	112362483	112368082	uc007has.1	Atxn7l3b	9.5377	9.32244	10.9131	10.9753
chr16	91404479	91426079	uc007zxk.2	Il10rb	4.16161	4.50652	5.53651	5.56789
chr13	100875973	100884188	uc007rqf.2	Serf1	3.8721	3.14395	5.247	4.80236
chr4	155219520	155233411	uc008wfb.1	Dvl1	2.70218	2.65852	4.07708	4.38732
chr9	66691470	66769512	uc009qfk.2	Rab8b	2.70218	1.92156	4.07708	4.28779
chr15	3913563	3931573	uc007vcf.2	Fbxo4	4.78964	4.98045	6.16454	6.15286
chr17	56336424	56360312	uc008dbi.2	Dpp9	3.02411	2.65852	4.399	4.18087
chr18	33955980	34168860	uc008ejz.1	Epb4.1l4a	3.02411	2.65852	4.399	4.48043
chr19	29062983	29101169	uc008hcw.1	Cdc37l1	3.02411	3.3366	4.399	4.28779
chr14	73595308	73727598	uc007upp.2	Rb1	5.45707	5.58452	6.83196	6.80236
chr19	15979621	16001515	uc008gwp.1	Psat1	4.02411	3.92156	5.399	5.48043
chrX	34631828	34652317	uc009sye.1	Upf3b	4.02411	3.3366	5.399	5.06539
chr10	80105361	80121816	uc011xit.1	Btbd2	7.14788	7.56541	8.52002	8.78421
chr8	122604994	122627372	uc009nqr.1	Zdhhc7	7.91488	8.11138	9.28653	9.31015
chr11	77979607	77992168	uc007kih.2	Nek8	6.68707	6.86016	8.05436	8.04267
chr11	105040334	105044747	uc007lxc.2	1700052K11Rik	5.5181	5.42406	6.88443	7.15286
chr7	134070392	134089123	uc009jtm.1	Kctd13	6.38868	6.76286	7.7495	7.93164
chr18	74373865	74381145	uc008fpg.1	Cxxc1	8.68897	9.00902	10.0486	9.92545
chr19	43922456	43988882	uc008hoy.1	Dnmbp	5.52661	5.86016	6.88443	6.78421
chr9	87086797	87152367	uc009qyg.1	4922501C03Rik	4.52661	4.50652	5.88443	5.43463
chrX	39148170	39267078	uc009tao.1	Thoc2	4.52661	4.50652	5.88443	5.83798
chr19	6067841	6079187	uc008ghb.1	1110014N23Rik	6.7861	7.05084	8.14317	8.46343
chr10	126504345	126509317	uc007hhw.1	Tspan31	9.99028	9.90455	11.3462	11.4397
chr1	145597920	145626181	uc007cxd.1	Trove2	6.36514	6.44512	7.72093	7.30061
chr15	76159723	76165329	uc007wjr.1	Gpaa1	6.8721	7.07806	8.22682	8.57846
chr7	26027578	26037777	uc009frz.2	Erf	10.4301	10.7407	11.7844	11.7882
chr2	102140275	102243057	uc008lhv.1	Trim44	8.14926	7.98045	9.50334	9.14577
chr6	124879405	124887256	uc009dsq.2	Mlf2	4.1833	3.92156	5.53651	5.12429
chr14	122872605	122879550	uc007vbd.1	Zic2	5.67946	5.92156	7.03127	7.26179
chr5	23929049	23946765	uc008wrm.2	Slc4a2	8.56016	8.81233	9.90997	9.93781
chr11	69650026	69653060	uc007jry.1	1810027O10Rik	8.26696	8.31388	9.61623	9.6996
chr2	18763882	18921748	uc008imb.1	Pip4k2a	5.89858	5.95131	7.247	7.23532
chr4	43579799	43593736	uc008sqi.2	Gba2	5.89858	6.21924	7.247	7.59937
chr13	21806290	21808683	uc007prb.1	Hist1h2ai	9.85108	10.3338	11.1986	11.3438
chr12	85326810	85334825	uc011yor.1	Acot2	5.68707	5.95131	7.03127	6.97228
chr4	129188824	129193225	uc008uxf.2	Marcksl1	12.0912	12.3067	13.4341	13.4611
chr2	120983162	120998885	uc012ccn.1	Zscan29	3.54348	3.79603	4.88443	4.65036
chr9	63494573	63607801	uc009qbi.1	Smad3	7.597	7.70292	8.93506	8.84238
chr19	6116003	6120586	uc008ghl.1	Sac3d1	8.22312	8.61737	9.56089	9.84018
chr17	34090826	34103433	uc008cam.1	Vps52	7.85868	8.0231	9.19602	9.42001
chr11	106887536	106891756	uc007mab.2	1810010H24Rik	4.32667	4.65852	5.66204	5.83798
chr7	30946286	30956746	uc009gdn.1	Zfp146	5.91163	5.03704	7.247	7.43463
chr13	64261173	64287845	uc011zaz.1	Habp4	5.8721	6.06452	7.20636	7.30061
chr3	95695918	95702213	uc008qlr.1	Aph1a	6.03011	6.14395	7.36248	7.65036
chr8	73282547	73286820	uc009mbl.1	Mpv17l2	6.1725	6.29079	7.50334	7.41117
chr15	98568056	98595549	uc007xnp.1	Arf3	9.83703	9.87963	11.1672	11.2569
chr7	4433122	4455282	uc009exq.1	Ppp1r12c	8.5612	8.81233	9.89086	9.98227
chr9	107516468	107539673	uc009rml.1	Gnai2	8.56223	8.76286	9.89086	10.1297
chr7	19811737	19832166	uc009flc.1	Opa3	8.40723	8.58926	9.73529	9.75189
chr7	104546512	104556310	uc009ijd.2	Ndufc2	9.35502	9.29079	10.6807	10.7331
chr17	25963987	25968788	uc008bce.2	Jmjd8	7.15064	7.27911	8.46939	8.6801
chr11	6170716	6176840	uc007hye.1	Tmed4	8.65346	8.84835	9.97189	10.1315
chr5	35001027	35043737	uc008xcy.1	Grk4	2.76107	1.3366	4.07708	4.06539
chr19	6227766	6237840	uc008ght.1	Ppp2r5b	8.45929	8.66751	9.77056	9.9025
chr5	115560307	115571322	uc008zdb.1	Acads	8.75656	8.90645	10.0658	10.4288
chr13	23712496	23716427	uc007puj.2	Hist1h1e	12.5136	12.4034	13.8228	14.1862
chr11	108779662	108812095	uc007mbu.2	Axin2	5.72455	5.79603	7.03127	7.44622
chr14	55525140	55533940	uc007txj.1	Slc22a17	5.35562	5.29079	6.66204	6.9067
chr5	143039434	143086706	uc009aix.1	Mmd2	4.85868	4.42406	6.16454	6.54652
chr1	134940588	135005265	uc011wry.1	Pik3c2b	5.73193	5.14395	7.03127	7.16693
chr17	27052035	27062232	uc008beq.1	Kifc5b	4.36514	4.24349	5.66204	5.9067
chr9	14078744	14130578	uc009oej.1	Sesn3	6.66411	6.54605	7.95972	8.05029
chr8	88241455	88366848	uc009mqf.2	Itfg1	7.64078	7.32528	8.93506	8.67026
chr11	50624586	50643233	uc007isq.1	Zfp354c	5.30704	5.24349	6.60064	6.33841
chr15	76332444	76344248	uc007wkn.1	Dgat1	6.99373	7.23141	8.28653	8.3508
chr11	105151959	105212459	uc007lxi.1	Mrc2	4.59295	4.72891	5.88443	6.15286
chr1	157003832	157050647	uc007dbb.1	Stx6	7.87877	7.97322	9.16454	9.41117
chr17	33828472	33857615	uc008bzk.1	2017-03-02	5.70218	5.65852	6.98397	7.13864
chr18	33096694	33355421	uc008ejq.2	Camk4	3.11722	2.65852	4.399	4.28779
chr3	63718617	63735307	uc008pkb.1	E130311K13Rik	3.11722	2.92156	4.399	4.72836
chr11	116778176	116848258	uc007mmu.1	Mgat5b	4.8854	4.72891	6.16454	6.60971
chr17	25151030	25236442	uc008azm.2	Ift140	4.384	4.50652	5.66204	6.23532
chr6	136754768	136758595	uc009eme.1	H2afj	8.76557	9.16315	10.0429	10.0389
chr19	8846974	8851452	uc008gmw.2	Gm2518	3.60907	3.50652	4.88443	5.38732
chr5	105946489	106037973	uc008ylf.1	Lrrc8c	5.70967	5.50652	6.98397	7.24862
chr4	138864658	138874701	uc008vmc.2	Akr7a5	7.61107	7.88349	8.88443	9.36613
chr15	102168677	102183190	uc007xvl.2	Aaas	4.9752	4.98045	6.247	5.93986
chr3	145419655	145557241	uc008rqr.2	Ddah1	9.71061	9.53872	10.981	10.8695
chr13	34127509	34165943	uc007qba.1	Bphl	4.26696	4.14395	5.53651	5.23532
chr18	84255549	84266906	uc008fun.1	Zadh2	4.50953	3.92156	5.77752	6.85547
chr2	154385374	154397588	uc008njk.1	E2f1	6.33638	6.54605	7.60064	7.48043
chr11	100979444	100987733	uc007lnk.1	Tubg1	8.98912	9.34503	10.252	10.2862
chr15	59478208	59488654	uc007vxx.1	Trib1	7.083	7.19458	8.34386	8.39929
chr19	6981308	6986135	uc008gjc.1	Prdx5	8.89365	9.19458	10.1539	10.2569
chr1	193130675	193143997	uc007ecg.1	Nenf	6.40262	6.50652	7.66204	7.86414
chrX	54636524	54648213	uc009thg.2	Rbmx	4.13958	3.92156	5.399	5.33841
chr13	45600837	45641750	uc007qha.1	Gmpr	6.27709	6.58452	7.53651	8.05786
chr17	15943216	15965550	uc008aow.1	Rgmb	4.98758	5.03704	6.247	6.03502
chr7	52958616	52965573	uc009gws.2	Dbp	6.20997	6.31388	7.46939	7.43463
chr1	137660661	137665711	uc007ctq.2	Phlda3	9.56688	9.88542	10.8253	10.8147
chr3	88767733	88883297	uc008pxj.1	Ash1l	5.67946	4.72891	6.93506	7.03502
chr12	55993975	56089323	uc007nnz.2	Baz1a	6.49659	6.11796	7.7495	7.89828
chr11	87879842	87898231	uc007kvf.1	Vezf1	7.43914	7.49647	8.69179	8.62509
chr4	140622426	140636260	uc008vnu.2	Necap2	8.61307	8.77954	9.86498	10.0841
chr11	54909618	54924400	uc007iyw.1	Gm2a	8.10306	8.07131	9.3532	9.54652
chr7	134714861	134726821	uc009jwc.2	Phkg2	6.95642	7.14395	8.20636	8.50834
chr18	67548384	67562403	uc008fmd.1	Tubb6	6.68707	6.79603	7.93506	8.41707
chr9	64834789	64871524	uc009qcp.2	Ptplad1	9.06046	8.92905	10.3059	10.1546
chr10	79710196	79719537	uc007gci.1	Ndufs7	8.78077	9.10809	10.0254	10.144
chr7	87239733	87262236	uc009hzn.2	Idh2	8.78699	9.07131	10.0313	10.3306
chr5	115223741	115226992	uc008zae.2	4930515G01Rik	3.64078	3.50652	4.88443	4.80236
chr1	52220293	52292076	uc007aye.2	Gls	5.64078	5.46588	6.88443	6.54652
chr13	3631321	3651025	uc007piz.1	Asb13	5.64078	5.72891	6.88443	7.10979
chr5	101083744	101105275	uc008yhu.2	Coq2	7.26187	7.24349	8.50334	8.63018
chrX	7303696	7308189	uc009sme.1	Praf2	8.39218	8.37551	9.63167	9.87489
chr9	37013917	37030796	uc009ouj.1	Tmem218	5.29712	4.92156	6.53651	6.67026
chr3	90050113	90057534	uc012csu.1	Slc39a1	7.42328	7.0231	8.66204	8.75656
chr2	127071710	127086500	uc008mfc.1	Tmem127	8.62798	8.57977	9.86498	9.81582
chr17	36114899	36126407	uc008cjo.1	Gnl1	9.27583	9.40806	10.5117	10.5248
chr17	35376814	35390652	uc008chc.2	Bat1a	6.36514	6.71164	7.60064	7.82028
chr13	41699584	41736726	uc011yyr.1	Tmem170b	5.54348	5.622	6.77752	6.97228
chr4	134769884	134830675	uc008vgd.1	Clic4	10.6425	10.5714	11.8747	11.7865
chr5	23924059	23931348	uc008wrl.1	Cdk5	7.85868	7.82041	9.0883	9.50002
chr4	120640921	120691852	uc008unw.2	Smap2	8.21393	8.06452	9.4434	9.41117
chr4	117556934	117561934	uc008ujc.1	Atp6v0b	9.44981	9.65852	10.6733	10.7437
chr15	81718657	81758594	uc007wxq.1	Polr3h	4.76107	4.24349	5.98397	5.65036
chr7	130112077	130123697	uc009jow.2	Rbbp6	3.43914	3.14395	4.66204	4.48043
chr7	139800325	139898102	uc009kce.1	Lhpp	6.68707	6.71164	7.90997	7.91506
chrX	67596244	67620260	uc012hjl.1	Ids	6.66411	6.64038	7.88443	7.74722
chr4	117567097	117589604	uc008ujg.1	Ipo13	8.40377	8.64494	9.62397	9.69232
chr16	93681463	93691236	uc007zzs.2	Cbr3	8.26696	8.34782	9.48647	9.36308
chr1	157122786	157266574	uc007dbf.1	Xpr1	5.76827	5.72891	6.98397	6.68989
chr12	3233525	3250374	uc007mwj.2	1700012B15Rik	4.1833	4.3366	5.399	5.87275
chr5	76567301	76584496	uc008xuo.1	Srd5a3	5.61706	5.65852	6.83196	6.72836
chr17	56394215	56403031	uc008dbk.2	Fem1a	9.45929	9.60806	10.6733	10.8983
chr19	7272695	7282774	uc008gki.1	Otub1	10.2996	10.4787	11.5096	11.6603
chr14	120875682	120906414	uc007uzx.1	Rap2a	7.68897	7.81233	8.89725	9.14932
chr17	29403732	29439832	uc008bsn.2	BC004004	8.26315	8.13101	9.46939	9.37525
chr15	83405523	83427587	uc007xbh.2	Ttll12	2.8721	3.14395	4.07708	4.65036
chr1	159340482	159350367	uc007ddi.1	2810025M15Rik	9.626	9.32812	10.8253	10.9098
chr10	90543783	90561403	uc007gtl.1	Ikbip	5.40262	5.14395	6.60064	6.33841
chr13	74073285	74098343	uc007rel.1	Brd9	4.20468	3.50652	5.399	5.60971
chr9	109986823	110021807	uc009rtj.1	Dhx30	3.20468	3.14395	4.399	4.72836
chr8	73918753	73928671	uc009mdb.2	5430437P03Rik	9.27646	9.58215	10.4694	10.439
chr4	105986817	106033488	uc008tyf.2	Usp24	3.47477	3.50652	4.66204	4.72836
chr9	95756015	95852063	uc012gyn.1	Atr	3.47477	3.14395	4.66204	4.56789
chr2	30139748	30143874	uc008jby.1	Dolk	7.59092	7.39188	8.77752	8.85112
chr5	138880703	138901922	uc009afo.2	Zfp157	4.80372	4.24349	5.98397	5.9067
chr12	88041451	88069410	uc011ypj.1	Angel1	6.38868	6.24349	7.56893	7.60971
chr17	33224311	33247649	uc008bya.1	Zfp563	3.89858	4.03704	5.07708	5.65036
chr4	106739216	106760596	uc012dib.1	mFLJ00377	4.07141	3.79603	5.247	5.72836
chrX	7762456	7772638	uc009soi.1	Ebp	7.7356	8.01608	8.90997	8.86845
chr5	36233967	36346571	uc008xej.1	Afap1	7.64665	7.71164	8.81854	8.685
chr9	55983690	56010877	uc009psx.2	Tspan3	7.86037	7.92156	9.03127	8.86414
chr3	148478549	148619699	uc008rsb.1	Lphn2	5.99373	5.50652	7.16454	6.88982
chr8	88362900	88584541	uc009mqj.1	Phkb	5.86541	5.29079	7.03127	7.08034
chr6	7793223	7822042	uc009axg.2	C1galt1	5.16161	5.03704	6.325	6.09514
chr4	8616067	8793956	uc008rya.1	Chd7	6.44365	6.16949	7.60064	7.78421
chr10	120847406	120915306	uc007hfs.1	Rassf3	9.09091	9.06791	10.247	10.3149
chr7	17321792	17334639	uc012faj.1	Ap2s1	9.90919	10.0143	11.0629	11.1625
chr10	128134994	128144082	uc007hoa.1	Cdk2	3.92457	3.3366	5.07708	4.80236
chr11	16849412	16854775	uc007ibu.1	Fbxo48	2.92457	2.65852	4.07708	4.28779
chr7	50716608	50726414	uc009gmu.1	Vsig10l	2.92457	3.14395	4.07708	4.06539
chrX	71630058	71640478	uc009tox.2	Fam3a	2.92457	3.14395	4.07708	5.06539
chr11	120500742	120507009	uc007mtw.1	Pycr1	5.0945	4.65852	6.247	5.97228
chr4	140998587	141023852	uc008vol.2	Zbtb17	8.69464	8.82845	9.84526	10.0896
chr7	50832955	50849080	uc009gnd.2	Zfp719	5.63292	5.29079	6.77752	6.80236
chr8	26125682	26133732	uc009lfn.2	Tm2d2	7.79317	7.98765	8.93506	9.08406
chr9	21725452	21733906	uc009omw.1	Tmem205	5.9814	5.50652	7.12147	7.43463
chr5	124913273	124930244	uc008zpx.1	Rilpl2	6.11157	6.29079	7.247	7.79331
chr5	130618757	130631678	uc008zue.1	Kctd7	5.46594	5.46588	6.60064	7.24862
chr16	21202867	21223377	uc007yrg.1	Ephb3	4.40262	4.58452	5.53651	5.83798
chr18	36177311	36358814	uc012bbl.1	Nrg2	4.40262	4.58452	5.53651	5.97228
chr16	72661393	73046345	uc007zrb.1	Robo1	5.85193	5.92156	6.98397	6.98823
chrX	35772685	35811632	uc009szx.1	Lamp2	5.75384	5.86016	6.88443	6.72836
chr8	81817021	81831584	uc009mio.1	AK041972	4.11722	4.24349	5.247	5.38732
chr15	85034437	85116724	uc011zxk.1	Fbln1	4.85868	4.92156	5.98397	6.26179
chr6	54458809	54518376	uc009bzw.1	Scrn1	8.07141	8.25546	9.19602	9.24862
chr11	119773123	119780866	uc007mrd.2	Chmp6	8.43914	8.48125	9.56089	9.78877
chr11	79151393	79395111	uc007kkl.1	Nf1	4.65637	4.58452	5.77752	6.09514
chr4	57956244	57971283	uc008syp.1	Txn1	10.9802	10.915	12.0994	12.1234
chr6	134877109	134901588	uc009elc.1	AK012387	4.54348	4.3366	5.66204	6.31332
chr1	134252891	134289858	uc007cot.1	Tmcc2	3.54348	3.50652	4.66204	4.93986
chr7	52469221	52488989	uc009guf.1	Tead2	3.54348	3.14395	4.66204	5.72836
chr9	14810228	14851922	uc009ofi.1	Panx1	3.54348	3.3366	4.66204	4.80236
chr5	38649613	38660857	uc008xgk.1	Tmem128	5.81766	5.79603	6.93506	6.80236
chr13	96371743	96390388	uc007rmn.1	F2r	8.74839	8.65401	9.86498	9.74722
chr12	36741141	36771065	uc007njn.1	Tspan13	7.20997	7.34782	8.325	8.26179
chr3	51319239	51366745	uc008peb.1	Setd7	7.37224	7.3366	8.48647	8.70925
chr18	36902019	36906202	uc008eoj.1	Ndufa2	8.76377	8.57977	9.87798	9.98227
chr4	135839983	135849857	uc008vhw.1	Zfp46	7.1725	7.21924	8.28653	8.6996
chr6	124791112	124809705	uc009dsf.1	Leprel2	5.66411	5.54605	6.77752	7.31332
chr17	47025569	47029412	uc008cum.1	Tbcc	7.5787	7.7203	8.69179	8.97229
chr14	104876750	104923883	uc007uxc.1	Rnf219	4.13958	4.03704	5.247	5.80236
chr4	129296518	129300665	uc008uxv.1	AK031278	4.13958	3.65852	5.247	5.28779
chr2	83562553	83647073	uc008kid.1	Itgav	8.02861	7.78781	9.13236	8.95211
chr4	132821959	132835705	uc008vcp.1	Tmem222	8.5612	8.57977	9.66204	9.68989
chr12	30620900	30702523	uc007ngl.2	Pxdn	5.73193	5.65852	6.83196	6.74722
chr19	7289647	7294106	uc008gkj.1	Cox8a	11.1642	11.2806	12.2632	12.3298
chr1	156943496	156948766	uc007dax.2	Ier5	7.20733	7.42406	8.30589	8.55189
chr4	43589606	43600359	uc008sqj.1	Rgp1	7.33638	7.41341	8.43463	8.58372
chr10	128106942	128112974	uc007hnt.2	Suox	6.84514	6.79603	7.93506	8.21514
chr13	73739748	73758053	uc007rdo.1	Clptm1l	9.56326	9.64494	10.6507	10.8544
chr11	60715747	60729294	uc007jgu.2	Gm16515	8.83746	9.06452	9.92257	10.1739
chr11	29121535	29149272	uc007igu.1	Ccdc104	6.35084	6.09148	7.43463	7.27485
chr3	121461827	121520133	uc008reg.1	Abcd3	8.22574	7.78781	9.30589	9.12068
chr9	50864884	50887199	uc012gtc.1	Layn	4.45707	4.24349	5.53651	5.60971
chr3	95117173	95127490	uc008qjj.1	Lass2	8.81852	8.64038	9.89725	9.91297
chr9	45929299	46010968	uc009pha.1	Sik3	6.12844	6.14395	7.20636	7.01959
chr7	17036127	17040839	uc009fhu.1	Tmem160	7.7411	7.91402	8.81854	8.83798
chr10	61909907	61914101	uc007fhe.2	4930507D05Rik	3.99986	3.65852	5.07708	4.87275
chr14	66913861	66930261	uc007ukd.1	Trim35	9.509	9.61968	10.5849	10.6715
chr9	57435258	57444040	uc009pvf.2	Ulk3	4.70218	4.50652	5.77752	5.97228
chr11	62338445	62354763	uc007jjf.2	Cenpv	8.77721	8.6358	9.85186	10.0312
chr4	32885233	32889229	uc008sfe.2	Lyrm2	5.91163	5.58452	6.98397	7.12429
chr7	31346884	31350203	uc009gez.1	Psenen	8.206	8.26733	9.27675	9.27809
chr15	25293031	25345519	uc007vix.2	Basp1	10.2198	10.321	11.289	11.1912
chrX	7474523	7484778	uc009sne.1	Timm17b	8.50953	8.67645	9.57692	9.78193
chr9	107469493	107475109	uc009rlu.1	Hyal2	7.80547	7.92905	8.87149	9.10614
chr4	132061990	132068414	uc008vbk.1	AK155592	5.91812	5.69415	6.98397	7.05029
chr13	104897869	104931521	uc007rss.1	Sgtb	5.33638	5.03704	6.399	6.36307
chr7	20216928	20252379	uc009fmq.1	Clptm1	10.3775	10.4477	11.4324	11.5499
chr2	32610790	32617764	uc008jgt.1	Tor2a	7.62303	7.44512	8.67699	8.81582
chr17	27259609	27272836	uc008bfk.1	2900010M23Rik	9.3224	9.37002	10.3763	10.4156
chr4	129782799	129805378	uc008uyw.1	Pef1	8.28087	8.43988	9.33446	9.3038
chr9	72771456	72793822	uc009qqi.1	Pygo1	3.60907	2.65852	4.66204	5.97228
chr9	64656817	64767474	uc009qcj.2	Dennd4a	3.02411	2.3366	4.07708	5.00399
chr5	4080673	4106697	uc008wie.1	Cyp51	10.0819	9.93651	11.1324	10.9753
chr11	78057247	78068998	uc007kiq.2	Sdf2	7.83489	7.95865	8.88443	8.83358
chr10	80003670	80026305	uc007gds.1	Rexo1	7.94694	8.11796	8.99594	9.3038
chr11	119958247	119961738	uc007mru.2	1810043H04Rik	6.45707	6.64038	7.50334	7.57846
chr13	38694574	38728978	uc007qdu.1	Muted	6.45707	6.46588	7.50334	7.42295
chr12	106269286	106271559	uc011yrk.1	Scarna13	10.3828	10.2584	11.428	11.8484
chr3	107815167	107822891	uc008qxx.2	Gstm1	8.4604	8.63122	9.50334	9.62509
chr6	140370619	140543427	uc009eob.1	Plekha5	3.36514	2.92156	4.399	5.33841
chr7	53126209	53139096	uc009gxn.1	Kdelr1	5.43914	4.79603	6.46939	6.78421
chrX	71540435	71550060	uc009tol.2	Atp6ap1	9.6866	9.66751	10.7137	10.7762
chr3	95971386	95978337	uc012ctw.1	AK142077	4.85868	4.92156	5.88443	5.93986
chr2	160469632	160548499	uc008nqy.1	Top1	6.95957	6.79603	7.98397	7.99613
chr13	112536642	112601191	uc007rwa.1	Map3k1	8.30333	8.34222	9.325	9.50557
chr4	125993594	126000947	uc008ute.1	Adprhl2	8.47587	8.5015	9.49493	9.65536
chr4	135500367	135518532	uc012dnc.1	Hmgcl	7.99066	7.98765	9.00781	9.21175
chr2	30269569	30303327	uc008jcn.2	Ppp2r4	10.3896	10.5028	11.4058	11.699
chr4	15883113	15919736	uc008sbn.1	Nbn	5.6486	4.98045	6.66204	6.72836
chr6	33197149	33922930	uc009bgt.1	Exoc4	7.9968	7.89884	9.00781	8.93164
chr15	102493298	102503478	uc007xwr.1	Atp5g2	11.2212	11.1992	12.2319	12.1765
chr13	75975333	75987599	uc007rfx.2	Glrx	6.62501	6.11796	7.63167	7.88131
chr5	137733896	137736892	uc009abz.1	Ufsp1	5.39334	5.54605	6.399	6.60971
chr18	38745918	38762922	uc008esl.1	Spry4	11.1291	11.1734	12.1296	12.1112
chr7	125832071	125851252	uc009jki.1	Gde1	8.87127	8.75445	9.86498	10.0859
chr15	74534992	74541752	uc007wfp.1	Jrk	7.91812	7.91402	8.90997	8.98028
chr17	25862695	25868401	uc008bbl.1	Rpusd1	3.6718	3.65852	4.66204	4.56789
chr16	38497924	38524747	uc012afp.1	4930455C21Rik	7.857	7.63122	8.83196	8.9025
chr9	120399723	120404445	uc009scp.2	Eif1b	8.24263	8.24949	9.21663	9.37525
chr7	107475246	107522406	uc009imu.1	Ppme1	9.03682	9.15678	10.0078	10.0654
chr14	56357856	56366521	uc007uan.2	Dhrs1	7.91488	7.96595	8.88443	9.28779
chr4	100447283	100676353	uc008tvh.1	Cachd1	5.50092	5.3366	6.46939	6.38732
chr7	134158564	134162866	uc009jtx.1	2900092E17Rik	8.85952	8.91403	9.82527	9.97229
chr15	83377226	83388141	uc007xbf.1	Mcat	8.0211	8.03704	8.98397	9.15639
chr1	75168214	75178857	uc007bnx.1	Abcb6	8.37342	8.38099	9.33446	9.30061
chr11	120208037	120212504	uc007msj.1	AK005967	3.70218	2.92156	4.66204	5.72836
chr19	41920464	41924622	uc008hmj.2	Frat2	5.82457	5.50652	6.77752	6.88982
chr7	135377964	135383545	uc009jyj.2	9130023H24Rik	5.5181	5.3366	6.46939	6.78421
chr5	28395951	28405202	uc012dtq.1	Insig1	9.95011	9.81638	10.8909	11.0905
chr11	69802871	69808451	uc007jtg.2	Gabarap	10.0841	9.98405	11.0196	11.1043
chr13	99637833	99698339	uc007rph.1	Tnpo1	3.95011	3.14395	4.88443	5.00399
chr10	59567004	59596661	uc007fel.1	Spock2	5.23616	5.19458	6.16454	7.09514
chr10	80147997	80166565	uc007geh.1	Mobkl2a	8.60002	8.622	9.52829	9.62509
chr2	27739944	27895030	uc008ixt.2	Col5a1	7.79317	7.83644	8.72093	8.73782
chr2	157191329	157222499	uc008noz.2	Manbal	7.23875	7.09148	8.16454	8.12429
chr16	84828115	84837819	uc007zti.1	Atp5j	3.16161	2.65852	4.07708	4.56789
chr7	27943676	27953821	uc009fva.2	Egln2	8.11581	8.14395	9.03127	9.10979
chr4	131397385	131423702	uc008vae.2	Mecr	7.85362	7.87575	8.76358	8.99218
chr15	100444092	100451192	uc007xrt.1	Dazap2	9.23616	9.21924	10.1432	10.1458
chr3	107415449	107436628	uc008qxg.2	Fam40a	8.0902	7.88349	8.99594	9.10979
chr19	5422823	5426916	uc008gcz.1	Drap1	3.76107	3.14395	4.66204	5.00399
chr11	5091555	5163613	uc007hwh.1	Kremen1	7.55808	7.575	8.45212	8.57846
chr18	58036331	58106475	uc008ezm.2	Slc12a2	7.89858	7.56541	8.79132	8.91088
chr10	82159751	82204137	uc007gjt.1	Hcfc2	4.50953	4.14395	5.399	5.97228
chr18	37913426	38001526	uc008erb.1	Pcdhga11	5.43914	5.29079	6.325	6.5028
chr1	122497063	122504568	uc007cjm.2	En1	3.78964	3.79603	4.66204	4.93986
chr17	25268338	25299044	uc008azv.1	Clcn7	3.78964	3.79603	4.66204	4.65036
chr19	4611783	4617502	uc008gah.2	Lrfn4	3.78964	3.3366	4.66204	4.72836
chr16	10281841	10316061	uc007ydj.1	Emp2	6.11157	5.79603	6.98397	6.97228
chr19	46762395	46777872	uc008hub.1	2010012O05Rik	4.78964	4.65852	5.66204	5.68989
chr4	151550208	151645964	uc008vzx.2	Acot7	3.20468	3.14395	4.07708	4.18087
chrX	20510520	20529726	uc009suc.1	Elk1	7.47477	7.37002	8.34386	8.44622
chr18	12800041	12895561	uc008ecj.2	Ttc39c	4.6718	4.58452	5.53651	6.03502
chrX	20192451	20196690	uc009ste.2	Ndufb11	9.33214	9.27911	10.196	10.4649
chr2	127261950	127272301	uc008mfk.2	Fahd2a	5.96896	5.46588	6.83196	6.92338
chr7	152099098	152116653	uc012fyb.1	Oraov1	3.54348	3.50652	4.399	4.48043
chr6	97101943	97131118	uc009dak.2	Tmf1	6.86876	6.46588	7.72093	8.01181
chr9	21959289	21962798	uc009ooc.1	Pigyl	6.8107	6.69415	7.66204	7.79331
