# Supplementary material for: YY1 and CTCF orchestrate a 3D chromatin looping switch during early neural lineage commitment
Source: HighWire-hosted journal article supplement (doi:10.1101/gr.215160.116), 2017-05-23
Supplement: Supplemental_Table_S18.xlsx [file Supplemental_Table_S18.xlsx]

## Sheet: Constit_18_2.14_plusprom
Beagan et al. 2017
Table S18, Constitutive Gene Annotations
#chr	start_pos	end_pos	gene_ID	gene_name
chr1	72755833	72760387	uc007bkv.2	Rpl37a
chr9	45575028	45638721	uc012gse.1	Cep164
chr1	113755278	113763495	uc007chy.1	Dsel
chr3	130936341	130976955	uc008rjl.1	Hadh
chr17	24856620	24858777	uc012amq.1	Snora78
chr15	77789427	77803254	uc007wom.1	Eif3d
chr14	21203859	21210132	uc007sjn.2	Dnajc9
chr19	5364812	5371511	uc008gct.1	Eif1ad
chr7	11072572	11082730	uc009fdf.1	Zik1
chr19	10624955	10632728	uc008gqc.1	Tmem216
chr14	45947498	45968746	uc007tgn.1	Psmc6
chr11	97562747	97574814	uc007lep.1	Psmb3
chr7	127776702	127803037	uc009jms.1	Uqcrc2
chr18	80401536	80422590	uc008fso.1	Txnl4a
chr6	115755531	115760761	uc009djc.1	Rpl32
chr10	57958952	57963996	uc007fdg.1	Ccdc138
chr9	31120691	31186128	uc009orp.1	Prdm10
chr6	108161089	108501108	uc009ddh.2	Itpr1
chr2	34634185	34657311	uc008jiu.1	Rabepk
chr19	8814292	8830132	uc008gmp.2	Stx5a
chr7	29593908	29607285	uc009fzz.2	Hnrnpl
chr4	132280818	132290461	uc008vbr.1	Xkr8
chr17	30729806	30751604	uc012aot.1	Glo1
chr1	13554782	13581945	uc007ait.1	Tram1
chr16	30063442	30067882	uc007ywl.1	Hes1
chr6	125118024	125143604	uc009dtt.1	Ncapd2
chr12	101538979	101761032	uc007oss.2	Ttc7b
chr11	62363005	62366714	uc007jjg.1	Ubb
chr8	71730944	71754438	uc009lxc.1	Zfp930
chr8	125624249	125629142	uc009nue.2	Rpl13
chr18	77694848	77805875	uc008frj.2	Rnf165
chr5	45825270	45843468	uc008xix.2	Qdpr
chr17	24375383	24390354	uc008avj.1	Ccnf
chr6	124908824	124917415	uc009dss.2	Cops7a
chr11	97067170	97143890	uc007ldv.1	Npepps
chr16	23105551	23114205	uc007ytf.2	Eif4a2
chr6	18796634	18804052	uc009bao.1	Naa38
chr5	23344761	23351963	uc008wqs.2	Tomm7
chr17	34012610	34029578	uc008bzw.2	Kifc1
chrX	74754565	74905604	uc009tqo.1	Tbl1x
chr2	26764326	26768831	uc008iwf.1	Rpl7a
chr13	113657987	113719588	uc007rws.1	Skiv2l2
chr2	19291262	19316597	uc008imf.1	Msrb2
chr3	85941861	85948590	uc008prc.2	Rps3a
chr19	21344767	21356779	uc008gyw.1	Zfand5
chr4	125722171	125732780	uc008usg.1	Mrps15
chr4	21804821	21839273	uc008sdj.1	Coq3
chr13	90227271	90254526	uc007rjo.2	Tmem167
chr3	51217937	51279907	uc008pdz.2	Naa15
chr1	182654173	182684335	uc007dwq.2	Acbd3
chr5	100790667	100847253	uc008yhk.2	Sec31a
chr6	85284955	85326628	uc009cpn.1	Rab11fip5
chr5	115747118	115752999	uc008zdp.2	Dynll1
chr10	80616715	80632465	uc007ggc.2	Pias4
chr4	124595708	124616161	uc008urj.2	Cdca8
chr4	107716443	107793104	uc008uas.1	Scp2
chr5	130357031	130365340	uc008ztn.1	Chchd2
chr7	105849872	105866571	uc009ikt.1	Prkrir
chr2	26493366	26496841	uc012bso.1	Snora17
chr8	11726104	11827152	uc009kvv.2	Arhgef7
chr1	183103356	183144109	uc007dxf.2	Wdr26
chr9	65306743	65336277	uc009qdi.1	Spg21
chr1	58957293	59032326	uc007bcv.2	Trak2
chr15	82966117	82981766	uc007xab.1	Poldip3
chr6	38237393	38251259	uc009bjx.2	Zc3hav1l
chr17	34075667	34086640	uc008cai.1	Wdr46
chr16	90384641	90499798	uc007zwi.1	Hunk
chr13	59856775	59873150	uc007qvd.1	Isca1
chr18	61884043	61887907	uc008fcp.2	1500015A07Rik
chr7	133929381	133937985	uc009jss.1	Ppp4c
chr8	34730057	34754448	uc009lke.1	Ubxn8
chrX	92217845	92224021	uc009tts.2	Spin4
chr11	57983155	57993082	uc007jap.2	Mrpl22
chr15	79908210	79915012	uc011zwe.1	Rpl3
chr5	33359464	33370615	uc008xag.2	Ywhah
chr14	55126018	55138307	uc007twf.2	Prmt5
chr7	106627402	106634219	uc009ils.1	Rps3
chr16	13817369	13835543	uc007ygk.1	Ntan1
chr2	25116117	25125406	uc008ira.2	Tprn
chr17	24767626	24775783	uc008axi.2	Nthl1
chr10	7511187	7514622	uc007ein.1	AK084809
chr16	55971916	56009025	uc012ago.1	Zbtb11
chr17	24184686	24212452	uc008auh.2	Kctd5
chr15	58718783	58733945	uc007vtq.2	Rnf139
chr17	35804683	35812627	uc008cig.1	Gtf2h4
chr18	85116685	85122916	uc008fuy.1	1700034H14Rik
chr6	108057014	108137577	uc009ddf.2	Sumf1
chr17	71323302	71341856	uc008dlv.1	Myl12b
chr18	73894691	73916133	uc008fow.1	Elac1
chr13	46762890	46771142	uc007qhi.1	C78339
chr2	29987390	30007533	uc008jbj.1	Tbc1d13
chr5	9156395	9162986	uc008wlg.1	AK037159
chr3	68876142	68933014	uc008pme.1	Kpna4
chr4	46050093	46128904	uc008ste.1	Tmod1
chr18	61872077	61887985	uc008fco.1	Grpel2
chr17	27052035	27069524	uc008ber.1	Kifc5b
chr7	109588208	109618285	uc009irp.2	Rrm1
chr8	35868663	35882948	uc009lks.1	Dusp4
chr6	88032466	88055298	uc009cva.2	Rpn1
chr1	162834541	162905107	uc007del.2	Rc3h1
chr4	155076923	155107982	uc008wel.2	Ssu72
chr17	29795545	29840304	uc008bth.1	Ftsjd2
chr4	151669459	151681231	uc008wad.1	Icmt
chr4	34610505	34636687	uc012dbo.1	Slc35a1
chr13	18807160	18958680	uc007pok.2	Vps41
chr7	148576058	148588875	uc009kkv.2	Taldo1
chr4	119137890	119167203	uc008umo.2	Rimkla
chr19	17466532	17475839	uc008gxo.2	Rfk
chr11	23546478	23567935	uc007ifj.1	Pex13
chr6	49210241	49216023	uc009bwo.1	AK076606
chr14	56195330	56200364	uc007tzd.1	Psme1
chr7	129182334	129212577	uc009joe.1	Ears2
chr9	79603047	79609660	uc009quv.1	Cox7a2
chr6	86474490	86478159	uc009csc.1	Pcbp1
chr19	46107090	46121701	uc012bmr.1	Ldb1
chr10	105276534	105284566	uc007gyp.1	Ccdc59
chr11	86331667	86360309	uc007ksp.2	Rps6kb1
chr9	50329721	50338746	uc009pjp.1	Pts
chr15	76456666	76472359	uc007wle.2	Tonsl
chr8	23104819	23172546	uc009lck.1	Atp7b
chr1	94336295	94372335	uc007cbh.1	Ndufa10
chr4	19446398	19499251	uc008sby.1	Cpne3
chr9	103948917	103967451	uc009rhf.2	Uba5
chr16	93606081	93610594	uc007zzr.1	Cbr1
chr5	64482188	64519397	uc008xmi.1	Pgm1
chr3	65183578	65198475	uc008pkn.1	Ssr3
chr16	20400832	20428467	uc007yps.1	Abcc5
chr3	107910216	107951032	uc008qyd.1	Gnai3
chr8	19981359	20022392	uc009lba.2	6820431F20Rik
chr1	184397389	184449614	uc007dye.2	Capn2
chr5	114220820	114228291	uc008yyp.1	Iscu
chr8	72564711	72595852	uc009lyo.1	Sugp1
chr14	46078466	46151740	uc007tgq.1	Fermt2
chr3	138187154	138220563	uc008rnn.1	Eif4e
chr17	56753721	56768298	uc008dco.1	Lonp1
chr11	6157547	6169732	uc007hyc.1	Ddx56
chr13	55460493	55466144	uc007qqp.1	Lman2
chr14	61958599	61981282	uc007ufv.2	Ebpl
chr9	115151699	115221539	uc009ryp.1	Stt3b
chr4	131828289	131849244	uc008vax.2	Taf12
chr2	164249746	164270688	uc008nuq.1	Sdc4
chr9	65972417	65986775	uc009qel.1	Fam96a
chr5	144471194	144495149	uc009akp.1	Usp42
chr2	3246220	3251900	uc008ids.2	Rpp38
chr3	79259892	79373601	uc012cqp.1	Fnip2
chr4	134968223	134991720	uc008vgm.1	Rcan3
chr18	67957760	68044824	uc012bel.1	Cep192
chr17	24663195	24665688	uc008awt.1	AK011460
chr15	51618108	51699007	uc007vrb.1	Eif3h
chr4	41442636	41452109	uc008sit.1	AI464131
chr17	29749775	29778604	uc008btf.1	Rnf8
chr11	76070727	76214643	uc007kfo.2	Nxn
chr17	74600039	74696203	uc012axb.1	Memo1
chr17	28038072	28047188	uc008bpu.1	Taf11
chr11	72607727	72740622	uc007jzl.2	Zzef1
chr4	34495863	34514157	uc008sga.1	Akirin2
chr16	32017948	32081359	uc007yyd.1	Pak2
chr8	73061573	73116757	uc009mau.1	Ell
chr11	97221864	97259856	uc007lea.1	Socs7
chr7	125247889	125261661	uc009jjn.1	Rps15a
chrX	71188133	71213654	uc009tnm.1	Hcfc1
chr7	134400475	134406181	uc009juw.1	Dctpp1
chr5	28641728	28745782	uc008wtz.1	Rbm33
chr3	95803754	95864378	uc008qly.2	Vps45
chr6	85083673	85089758	uc012eod.1	Spr
chr1	10021000	10029979	uc007ahf.1	Cops5
chr10	84847558	85123037	uc007glg.2	Btbd11
chr10	93045773	93054403	uc007guw.2	Snrpf
chrX	70931521	70963514	uc009tmj.1	Bcap31
chr8	87500810	87504617	uc012ghn.1	Junb
chr3	89575530	89587919	uc008qad.2	Ube2q1
chr17	25319505	25324607	uc012amz.1	BC003965
chr12	88783797	88786967	uc007ojc.1	Nrp
chr1	94828984	94837549	uc007cbx.1	Capn10
chr11	78113092	78135956	uc007kiv.2	Spag5
chrX	162827964	162880636	uc009uwr.2	Ofd1
chr14	66437863	66454806	uc007ujp.2	Esco2
chrX	34664757	34690741	uc009syg.2	Nkap
chr3	133815689	133905605	uc008rkt.1	AK136882
chr17	41069633	41098938	uc008coo.2	Mut
chr15	34010473	34072140	uc007vlh.1	Mtdh
chr2	179771080	179779107	uc008oib.1	Psma7
chr18	32320742	32396405	uc008ejd.2	Map3k2
chr11	115469232	115475817	uc007mib.1	Mif4gd
chr7	107305786	107309441	uc009iml.2	Lipt2
chr14	51535048	51546568	uc007tlx.1	Osgep
chr2	112203175	112210184	uc008loy.1	Tmem85
chr2	38857100	38862651	uc008jnz.1	Rpl35
chr4	100739642	100824975	uc008tvj.1	Raver2
chr11	60266118	60282207	uc007jfy.1	Drg2
chr5	116007475	116013738	uc008zed.2	Rplp0
chr8	74683098	74705265	uc009mfk.1	Rab8a
chr4	6116251	6146935	uc008rxj.1	Ubxn2b
chrX	20423668	20430031	uc009sts.2	Araf
chr1	163026575	163063610	uc007dfh.1	Klhl20
chr6	112994320	113018267	uc009del.1	Thumpd3
chr18	36438815	36447898	uc008enh.2	Pura
chr2	153565022	153599050	uc008nik.1	Mapre1
chr1	93192914	93217657	uc007caf.1	Scly
chr11	30829783	30856131	uc007iic.1	Erlec1
chr16	32275546	32301525	uc007yyo.2	Rnf168
chr3	146160799	146168507	uc008rrk.1	Gng5
chr11	120493081	120496439	uc011yjh.1	AK163532
chr11	60214125	60232601	uc007jfv.2	Atpaf2
chr11	120421617	120436250	uc007mti.1	P4hb
chr8	13783614	13798537	uc009kyn.1	Upf3a
chr16	5244247	5258049	uc007ybz.1	Fam86
chr9	56048935	56267857	uc009psz.2	C230081A13Rik
chr14	52780093	52818914	uc007tor.1	Supt16h
chr15	35299300	35860984	uc007vmh.2	Vps13b
chr3	28678232	28697768	uc008oud.1	Eif5a2
chr3	104625702	104669423	uc008quq.2	Capza1
chr3	90033518	90039762	uc008qbo.1	Jtb
chr17	34086856	34090433	uc008caj.2	B3galt4
chr14	21491542	21514072	uc007skg.2	Sec24c
chr1	89747861	89841064	uc011wos.1	Dgkd
chr13	91060726	91064337	uc007rjq.2	Gm15450
chr5	28067204	28119879	uc008wtr.1	Paxip1
chr3	94301465	94388624	uc008qgr.1	Snx27
chr4	126352886	126386959	uc008utr.2	Psmb2
chr11	116106479	116137531	uc007mkq.1	Srp68
chr7	148140737	148143860	uc009kiz.1	Ifitm2
chr2	155645572	155654661	uc008nll.1	Eif6
chr9	114284248	114301830	uc009rxg.2	Crtap
chr1	169302514	169325928	uc007dky.1	Mgst3
chr15	99300514	99307161	uc007xpo.2	Bcdin3d
chr6	17585097	17616536	uc009azt.1	Capza2
chr13	15553555	15821858	uc007pns.1	Gli3
chr11	78320556	78327670	uc007kjn.1	Tmem199
chr3	94245257	94252630	uc008qgj.1	Mrpl9
chr19	29594771	29680411	uc008hds.1	C030046E11Rik
chr2	166861296	166890515	uc008nzc.1	Znfx1
chr5	92872898	92936634	uc008ydm.1	Scarb2
chr8	4611169	4630231	uc009ktz.1	Zfp958
chr11	97562747	97569378	uc007leo.1	Psmb3
chr7	36332203	36342947	uc009gka.1	Nudt19
chr1	161160456	161277711	uc007ddz.1	Rfwd2
chr19	60939968	60952441	uc008icd.1	Prdx3
chr2	112293181	112307593	uc008lpb.1	2900064A13Rik
chr1	88049354	88156402	uc007bvf.1	Armc9
chr6	124660306	124666963	uc009dri.1	Phb2
chr14	76161805	76188844	uc007uqx.1	Slc25a30
chr19	5273920	5297455	uc008gcm.2	Sf3b2
chrX	91879407	91883900	uc009tto.1	Gspt2
chr4	102984450	103039033	uc008txq.1	Oma1
chr16	94719330	94750236	uc008abe.2	Dscr3
chr2	50135400	50154197	uc008jqc.1	Mmadhc
chr10	61141068	61156045	uc007fgg.1	Sar1a
chr2	153115151	153159125	uc008nhp.2	Kif3b
chr6	112576409	112648642	uc009dee.1	Rad18
chr11	121311262	121478484	uc007mvy.2	Tbcd
chr18	34760821	34786464	uc008eky.1	Brd8
chr1	173218694	173227113	uc007dnw.1	Ufc1
chr11	68857144	68865164	uc007jpa.1	Aurkb
chr1	154611671	154622710	uc007czj.2	Arpc5
chr17	25323344	25371387	uc012ana.1	Unkl
chr7	19941357	19946832	uc009fln.2	Cd3eap
chr19	9014409	9026790	uc008gof.1	Mta2
chr2	102911831	102932806	uc008lin.2	Apip
chr1	187184973	187252234	uc007dzg.1	Eprs
chr2	156004296	156007976	uc008nmw.1	Caper
chr8	28194312	28233908	uc009lhx.2	Gpr124
chr10	117125960	117149772	uc011xnp.1	Mdm2
chr2	71112351	71207611	uc008kan.1	Slc25a12
chr3	89017108	89030759	uc008pyg.2	Thbs3
chr2	37296804	37421957	uc008jmx.1	Rabgap1
chr6	124908428	124917547	uc009dsr.2	Cops7a
chr6	85400012	85405896	uc009cpu.1	AK153821
chr13	74307252	74348148	uc007reu.1	Exoc3
chr7	71535656	71557005	uc009hgi.1	Mcee
chr8	122032051	122084661	uc012gls.1	Mbtps1
chr5	20386270	20392688	uc008woc.1	Tmem60
chr3	115589100	115632241	uc008rbs.1	Dph5
chr4	86500002	86505271	uc008tme.1	Rps6
chr5	89192037	89212302	uc008yah.1	Dck
chr19	43738294	43751371	uc008hop.1	Slc25a28
chr9	120840517	120865565	uc009sct.2	Ctnnb1
chr10	7510691	7532672	uc007eio.2	Ppil4
chr3	87883972	87924970	uc008pty.1	Iqgap3
chr10	95009640	95028801	uc007gwp.2	Nudt4
chr12	86558462	86567578	uc007ogr.1	Eif2b2
chr15	8117105	8221158	uc007ven.2	2410089E03Rik
chr7	48852630	48881235	uc009gls.1	AK011498
chr7	107683613	107688326	uc009ine.1	Chchd8
chr16	62793514	62848866	uc007zpu.2	Arl13b
chr2	90892172	90899595	uc008kuf.2	Psmc3
chr17	56177838	56207855	uc008dar.1	Chaf1a
chr10	77449693	77474541	uc007fwo.2	Pfkl
chr18	36892723	36902045	uc008eoi.1	Tmco6
chr2	130105044	130112187	uc008min.2	Idh3b
chr15	75769381	75779830	uc007whu.1	Zfp623
chr5	65779602	65784670	uc008xnp.2	Rpl9
chr2	150855420	150867115	uc008muv.2	Nanp
chr6	70792520	70855234	uc009cgb.1	Eif2ak3
chr5	21240977	21262970	uc008wox.1	Pmpcb
chr7	112893360	112902721	uc012frq.1	Tpp1
chr8	131207553	131257479	uc009nzv.2	Itgb1
chr5	145527660	145620642	uc009alt.1	Trrap
chr11	100208640	100219455	uc007lkx.2	Hap1
chr15	86042888	86328933	uc007xea.1	Tbc1d22a
chr13	19449544	19489621	uc007ppa.1	Stard3nl
chr12	55746360	55759559	uc007nnt.1	1110002B05Rik
chr9	65736129	65751358	uc009qeb.1	2810417H13Rik
chr3	68696420	68810492	uc008plx.2	Ift80
chr17	46914466	46921605	uc008cuk.1	Rpl7l1
chr1	187026046	187110625	uc007dyu.2	Rab3gap2
chr3	36347845	36376809	uc008ozj.2	Anxa5
chr11	97658985	97700078	uc007lew.1	Lasp1
chr8	23738590	23765909	uc009ldk.2	Polb
chr11	84634229	84644505	uc007kqs.2	Dhrs11
chr18	58817135	58839224	uc008ezq.1	Isoc1
chr16	10783901	10787629	uc007yed.1	Socs1
chr17	56810679	56851192	uc008dcv.1	Ranbp3
chr7	19733186	19738075	uc009fkv.1	Snrpd2
chr10	45295634	45432151	uc007fad.2	Hace1
chr18	73730358	73752232	uc008fot.2	Mex3c
chr11	17057300	17100383	uc007ica.1	Ppp3r1
chr11	62414961	62417023	uc011xwd.1	Snord49a
chr11	76540103	76579057	uc007kfz.1	Gosr1
chr11	102024802	102048570	uc007lqs.1	Lsm12
chr9	78326260	78331531	uc009qun.1	Eef1a1
chr1	58641442	58652792	uc007bck.1	Ndufb3
chr17	56890747	56898953	uc008ddc.1	Nrtn
chr10	80063624	80070399	uc007gdx.1	Adat3
chr7	29133707	29137717	uc012fgr.1	Rps16
chr14	58168434	58192406	uc007udd.1	N6amt2
chr7	52377757	52381759	uc009gth.2	Rps11
chr11	116293407	116300391	uc007mlb.1	Fam100b
chr1	91824808	91828437	uc007bzc.1	AK036422
chr8	73986824	73989652	uc009mdh.1	Mrpl34
chr18	75158130	75163035	uc008fpw.2	Rpl17
chr1	34066669	34365497	uc007aoi.1	Dst
chr17	15612684	15637240	uc008aol.1	Psmb1
chr1	130138757	130175954	uc007cll.1	Ubxn4
chr16	17152107	17203585	uc007ykl.1	Ube2l3
chr16	33249541	33299648	uc007yzz.1	Snx4
chr1	64735786	64772216	uc007bgx.1	Ccnyl1
chr8	47292697	47298363	uc009lpz.1	Slc25a4
chr13	55734387	55782617	uc011yzx.1	Ddx46
chr10	127980620	127986800	uc007hni.1	Zc3h10
chr15	96115952	96235894	uc007xkd.2	Arid2
chr5	122870452	122893443	uc008zlg.2	Anapc7
chr3	116213996	116252899	uc008rcg.2	Dbt
chr3	94688245	94692880	uc008qhe.2	Psmb4
chr14	31996498	32022012	uc007sxa.1	Nisch
chr11	72830509	72855567	uc007jzt.1	Camkk1
chr5	125894773	125916418	uc008zrq.1	Dhx37
chr3	14884425	14900770	uc008oqt.2	Car2
chr11	32103414	32108995	uc007ija.2	Snrnp25
chr10	128061584	128065562	uc007hno.2	Rps26
chr2	122058574	122091073	uc008maj.1	Sord
chr8	113578238	113581499	uc009nlp.1	Exosc6
chr6	29415782	29420509	uc009bdp.1	Atp6v1f
chr9	120017516	120033437	uc009scc.1	Slc25a38
chr16	36043929	36073601	uc007zcd.1	Fam162a
chr13	67001556	67008286	uc007qzu.1	Uqcrb
chr19	31155330	31161082	uc008her.1	Cstf2t
chr2	84528076	84557321	uc008kiz.2	Zdhhc5
chr4	126696544	126708480	uc008utz.2	Sfpq
chr8	122284486	122304316	uc009nqh.1	4632415K11Rik
chr1	127455592	127492261	uc007ckg.1	Slc35f5
chr9	35368405	35379654	uc009oti.2	Hyls1
chr2	32303976	32310996	uc008jfr.1	Naif1
chr15	36700016	36726293	uc007vmz.2	Ywhaz
chr12	13273932	13590617	uc007nbj.2	Nbas
chr15	80776948	80799803	uc007wvz.1	Adsl
chr5	108862271	108865397	uc008yoa.1	Atp5k
chr12	80128149	80182642	uc007nzr.2	Plekhh1
chr8	127381589	127388929	uc009nxt.2	2810004N23Rik
chr14	63739301	63764758	uc007uhh.1	Ctsb
chr1	64835694	65005398	uc007bha.1	Plekhm3
chr13	94204156	94271644	uc007rlf.1	Jmy
chr7	4759615	4765942	uc009eyt.1	Ube2s
chr5	115727710	115746981	uc008zdo.1	Coq5
chr5	138626762	138635122	uc009aez.1	Cnpy4
chr14	55202499	55226745	uc007twk.1	4931414P19Rik
chr2	143773130	143838999	uc008mqj.1	Rrbp1
chr10	39330739	39375113	uc007ewa.1	Traf3ip2
chr11	120207003	120211798	uc007msi.1	Actg1
chr2	172264077	172295399	uc008ocw.1	2410001C21Rik
chr4	116826440	116830737	uc008uic.1	Rps8
chr14	56297917	56302654	uc007uaf.2	Tinf2
chr11	86397366	86499324	uc007ksv.1	Tmem49
chr7	20296762	20302778	uc009fnc.2	Tomm40
chr10	127927916	127932881	uc007hnd.1	Myl6
chr14	19100336	19105500	uc007shr.1	Rpl15
chr6	84568479	85021507	uc009cpa.2	Exoc6b
chr14	70165278	70184218	uc007umv.2	Tnfrsf10b
chr5	121061138	121078601	uc008zhq.1	Ddx54
chr4	24823229	24832148	uc008sed.2	Ndufaf4
chr9	57002847	57008106	uc009pul.1	Commd4
chr2	156686857	156699298	uc008noc.2	1110008F13Rik
chr15	36407422	36428546	uc007vmt.2	Ankrd46
chr8	108377002	108380850	uc009nei.2	Thap11
chr4	147820690	147931794	uc008vur.2	Mtor
chr9	108468195	108471673	uc009rqh.1	Ndufaf3
chr11	72025225	72031094	uc007jyk.1	Med31
chr11	62414587	62416650	uc011xwc.1	Snord49b
chr9	44156187	44171753	uc009pdb.1	Vps11
chr3	89137314	89143950	uc008pys.1	Efna4
chr7	27980141	27990188	uc009fvj.1	BC024978
chr7	106631294	106633442	uc009ilt.1	Snord15a
chr3	88138181	88156641	uc008pus.1	Smg5
chr5	136590560	136598817	uc008zzw.2	Polr2j
chr7	107518742	107618668	uc009imx.1	C2cd3
chr17	29167604	29180317	uc008bse.2	Sfrs3
chr14	55303007	55309579	uc007twy.2	1700123O20Rik
chr11	120489666	120496861	uc007mtu.1	Mafg
chr15	83996245	84019951	uc007xbw.1	Pnpla3
chr3	40870247	40888968	uc008pce.2	Pgrmc2
chr13	55631770	55640019	uc007qro.2	Ddx41
chr17	45641789	45657792	uc008cqr.1	Aars2
chr5	38918051	38954834	uc008xgs.1	Wdr1
chr9	45773393	45794954	uc009pgx.1	Pafah1b2
chr4	40217695	40228401	uc008shk.1	Ndufb6
chr8	113681457	113785102	uc009nma.1	Glg1
chr11	102289635	102298123	uc007lrv.2	Grn
chr19	6274895	6300096	uc008ghz.1	Ehd1
chr11	106060669	106079681	uc007lyi.1	Ccdc47
chr8	72824683	72830821	uc009lzw.1	Cope1
chr10	126459387	126469870	uc007hhm.1	Tsfm
chr4	88781273	88826994	uc008tof.2	Mtap
chrX	34427536	34444894	uc009sxw.1	Nkrf
chr7	30904966	30920051	uc009gdf.1	Zfp382
chr7	29524659	29528800	uc009fzo.1	Mrps12
chr6	86335999	86349144	uc009cro.2	Pcyox1
chr10	31031210	31047892	uc007etq.1	Hddc2
chr17	46284333	46292500	uc008cru.2	Mad2l1bp
chr15	75728535	75741770	uc007whn.1	Eef1d
chr11	115999095	116002182	uc007mke.1	Mrpl38
chr13	29998443	30079932	uc007pyq.2	E2f3
chr2	130491576	130502828	uc008mjt.1	Itpa
chr4	155203754	155207168	uc008wey.1	Aurkaip1
chr8	19782732	19788986	uc009lat.1	5330429B09Rik
chr3	153570252	153577957	uc008rui.2	Rabggtb
chr1	59967849	60042190	uc011wlt.1	Fam117b
chr15	96242128	96293274	uc007xkf.1	Scaf11
chr8	14886535	14901719	uc009kze.1	Cln8
chr19	56620750	56673336	uc008hzc.1	Nhlrc2
chr10	36692349	36721694	uc007evf.1	Hdac2
chr5	3643146	3649936	uc008whi.2	Gatad1
chr2	180423415	180438805	uc008ojx.1	Dido1
chr11	70336858	70341360	uc007jve.2	Psmb6
chr5	104474029	104494386	uc008yka.1	Nudt9
chr3	144094070	144235180	uc012cyx.1	Hs2st1
chr5	140979562	141001192	uc009ahs.2	Chst12
chr10	85401381	85422538	uc007gni.1	D10Wsu52e
chr16	4544660	4561720	uc007xzv.1	Tcfap4
chr12	86449782	86475041	uc007ogj.2	Dlst
chr2	128889682	128922019	uc008mhe.2	Ttl
chr15	81149350	81193195	uc007wwk.1	Slc25a17
chr8	87194377	87213761	uc009mmu.2	Nacc1
chr1	193397612	193433514	uc007eco.1	Ints7
chr8	124075878	124104706	uc009nrv.2	Fbxo31
chr14	30789522	30806407	uc007sum.2	Actr8
chr14	55232956	55238832	uc007twl.1	Psmb5
chr8	72653231	72657647	uc009lyw.1	Nr2c2ap
chr13	58227239	58231917	uc007qtf.2	Hnrnpa0
chr17	80793091	80881793	uc008drg.1	Sos1
chr15	76728370	76731727	uc007wms.1	Commd5
chr8	87354180	87359381	uc009mnj.1	Gadd45gip1
chr13	73466456	73469626	uc007rdi.1	Mrpl36
chr2	156820797	156834811	uc008nok.2	Dsn1
chr6	126771880	126801162	uc009dve.2	Ndufa9
chr8	19888754	19895019	uc009lax.2	5330429B09Rik
chr9	69937116	69991364	uc009qnu.1	Fam81a
chr16	35397397	35492959	uc007zbl.1	Pdia5
chr8	113348334	113372703	uc009nlc.1	Sf3b3
chr7	13505659	13512035	uc009fep.2	Rps5
chr17	25098170	25154175	uc008azk.2	Cramp1l
chr15	72824246	72893634	uc011ztt.1	Trappc9
chr4	136535646	136606610	uc008vit.1	Zbtb40
chrX	34622514	34627179	uc009syc.1	Rpl39
chr11	50202804	50246613	uc007isn.1	Rufy1
chr5	122839936	122856187	uc008zlf.1	Arpc3
chr5	74589350	74595502	uc008xtj.1	Rasl11b
chr11	93820238	93831835	uc007kxu.1	Nme1
chr15	99530717	99544426	uc007xqb.1	Smarcd1
chr4	124601047	124616161	uc008urk.2	Cdca8
chr1	177531508	177557766	uc007dtn.2	Fh1
chr4	108518461	108522017	uc008ubt.1	Kti12
chr13	97899381	97909881	uc007rns.2	Nsa2
chr11	120455829	120461679	uc007mtl.1	Thoc4
chr3	96674988	96711221	uc008qom.1	Gpr89
chr4	120731842	120772848	uc008uny.1	Zmpste24
chr8	35153476	35173565	uc009lko.2	Dctn6
chr4	41238332	41263934	uc008sil.2	Dcaf12
chr13	30632180	30639185	uc007pyv.2	Uqcrfs1
chr14	60242117	60250497	uc007uer.2	Shisa2
chr4	150421413	150434062	uc008vyj.1	Vamp3
chr6	113390588	113395002	uc009dgd.1	AK034671
chr4	155114748	155137207	uc008wen.2	Atad3a
chr7	134525773	134532680	uc009jve.1	9130019O22Rik
chr7	36427003	36434501	uc009gkf.1	Pdcd5
chr2	120686011	120798451	uc008lxb.1	Ubr1
chr4	41410180	41427959	uc008sis.1	Nudt2
chr7	112952295	112961601	uc009izl.1	Mrpl17
chr15	31385653	31462792	uc007vkh.1	2017-03-06
chr2	84888616	84913205	uc012byp.1	Tnks1bp1
chr7	138701904	138715412	uc009kbq.1	Bub3
chr16	10410030	10424518	uc007ydo.2	Nubp1
chr2	94140922	94248846	uc008lgu.1	Ttc17
chr9	118513826	118810121	uc009rzw.2	Itga9
chr17	56902173	56909516	uc008ddd.2	Dus3l
chr7	147321462	147336685	uc009khd.2	Mtg1
chr11	102766832	102788438	uc007lsy.2	Kif18b
chr13	23790006	23792318	uc007puo.1	Hist1h4c
chr12	86681563	86717667	uc007ogz.1	Tmed10
chr13	81920290	81936156	uc007rid.1	Cetn3
chr6	145811256	145815860	uc009ert.1	Bhlhe41
chr13	55722365	55733777	uc007qrv.1	Caml
chr11	116399066	116444761	uc007mln.1	Ube2o
chr4	135559284	135579564	uc008vhp.1	Tceb3
chr19	53065672	53115032	uc008hwg.1	Xpnpep1
chr8	108048369	108091940	uc009ndg.1	Atp6v0d1
chr9	71326243	71335790	uc009qoz.2	Grinl1a
chr9	26781725	26809134	uc009opy.1	Acad8
chr8	90856209	90888090	uc009mrn.2	Brd7
chr2	105742794	105805715	uc008lle.1	Immp1l
chr5	123250287	123273348	uc008zml.1	Anapc5
chr11	44330465	44379022	uc007inh.2	Rnf145
chr12	13226112	13257980	uc007nbh.1	Ddx1
chr7	29343837	29385203	uc009fzh.1	Pak4
chr3	65752813	65764147	uc008pkx.1	Ccnl1
chr7	136733376	136779252	uc009jzo.2	Wdr11
chr7	148657758	148663052	uc009klm.2	Polr2l
chr12	86640463	86682312	uc007ogx.2	Nek9
chr7	134013016	134030481	uc009jth.2	Taok2
chr19	47251309	47318101	uc008hut.1	Neurl1a
chr8	73032164	73036266	uc009mam.1	Uba52
chr13	17972408	18038051	uc007pof.1	Rala
chr5	115592989	115610185	uc008zdf.2	Mlec
chr11	96900899	96910527	uc007ldm.1	Mrpl10
chr11	115277010	115283233	uc007mhm.1	Atp5h
chr10	79687342	79707889	uc011xin.1	Mum1
chr2	23010065	23054156	uc008ioe.1	Yme1l1
chr7	35831440	35843585	uc009gjk.1	Cebpg
chr9	21758196	21762714	uc009onc.2	2310047B19Rik
chr11	119802405	119868096	uc007mrj.2	Baiap2
chr16	31959755	32005373	uc007yya.2	Senp5
chr3	116191881	116213093	uc008rcd.2	Rtcd1
chr1	46864388	46912354	uc007axc.1	Slc39a10
chr18	61713235	61741916	uc008fcc.1	Csnk1a1
chr4	46500200	46516310	uc008stv.1	Nans
chr3	8802145	8925857	uc008ooq.2	Mrps28
chrX	53861011	53917407	uc009tgk.2	Slc9a6
chr9	77763171	77832326	uc009qtn.2	Elovl5
chr2	148504855	148518685	uc008mtg.2	Gzf1
chr7	73222534	73234291	uc009hha.1	H47
chr3	121975331	121988189	uc008rep.1	Dnttip2
chr11	86508154	86572994	uc007kta.1	Cltc
chr2	17946815	17961368	uc008ilj.2	A930004D18Rik
chr9	42916735	42926653	uc009pbd.1	Tmem136
chr7	121359072	121400194	uc009jhx.1	Copb1
chr1	133722588	133745440	uc007cnu.2	Slc41a1
chr3	115641890	115712324	uc008rbt.2	Slc30a7
chr5	20454806	20462216	uc008wog.2	A630072M18Rik
chr2	118998235	119036531	uc008ltg.2	Dnajc17
chr7	31015092	31018406	uc009gdt.1	Polr2i
chr7	35068976	35100566	uc009gjb.1	4931406P16Rik
chr1	121804477	121811745	uc007cja.1	Tmem177
chr12	33061653	33067808	uc007nie.2	2010109K11Rik
chr7	3594870	3612711	uc009evl.2	Cnot3
chr11	103538162	103561024	uc007lvo.2	Gosr2
chr8	73195129	73202651	uc012gfd.1	Lsm4
chr11	60349184	60372014	uc007jgd.2	Alkbh5
chr8	127414198	127423605	uc009nxw.1	Exoc8
chr4	151393884	151403780	uc008vyz.1	Zbtb48
chr2	32561301	32570304	uc008jgo.2	Cdk9
chr17	57242807	57247180	uc008ded.1	Tnfsf9
chrX	71654824	71676500	uc009toy.1	G6pdx
chr5	145944574	145954461	uc009amk.1	Atp5j2
chr16	20095626	20127817	uc007yph.1	Klhl24
chr4	12080868	12101162	uc012daq.1	Fam92a
chr15	100223088	100255486	uc007xrd.2	Slc11a2
chr3	95426901	95434415	uc008qkj.1	Ensa
chr2	172169076	172181249	uc012ckn.1	2010011I20Rik
chr3	83568242	83578236	uc008ppl.2	Sfrp2
chr4	131863379	131865515	uc012dmf.1	Snora16a
chr9	64563106	64587563	uc009qce.1	Rab11a
chr12	113881038	113887363	uc007pev.2	Siva1
chr11	21456694	21473937	uc007idv.2	Mdh1
chrX	151758462	151774997	uc009uru.1	Prdx4
chr10	117170733	117185414	uc007hdn.1	Slc35e3
chr12	113199586	113207188	uc007pef.1	2010107E04Rik
chr7	108810281	108938682	uc009ipc.1	Clpb
chrX	147479775	147523629	uc009uow.1	Fgd1
chr16	96365025	96379459	uc008acq.1	Wrb
chr18	78000290	78008519	uc008frt.1	Haus1
chr10	92621620	92704087	uc007gul.2	Cdk17
chr7	134009190	134030481	uc009jtg.2	Taok2
chr8	112087885	112097951	uc012gkh.1	Txnl4b
chr12	71065998	71089989	uc007nte.1	Sav1
chr6	11850372	11859446	uc009ayd.1	Ndufa4
chr7	87437350	87449316	uc009iae.2	Prc1
chr13	23853721	23856255	uc007puy.1	Hist1h3a
chr19	47157960	47167115	uc008huo.1	Usmg5
chr9	44731209	44775683	uc009peu.2	Ube4a
chr5	123792456	123810285	uc008znn.2	Bcl7a
chr14	21210452	21214777	uc007sjp.1	Mrps16
chr7	107068764	107130968	uc009img.2	Rnf169
chr14	48008392	48040082	uc007tie.2	Dlgap5
chr14	66585319	66600382	uc007ujs.2	Clu
chr3	65330368	65359440	uc008pkr.1	Tiparp
chr1	36746331	36750233	uc007aqw.1	Cox5b
chr11	116700762	116706763	uc007mmj.1	Jmjd6
chr6	113678045	113692675	uc009dhm.1	Sec13
chr5	45909467	45920523	uc012dvz.1	Med28
chr3	89118872	89128801	uc008pyq.1	Efna3
chr17	15839930	15909576	uc008aou.2	Chd1
chr1	121312041	121320825	uc007cir.1	Inhbb
chr12	86335270	86411465	uc007ogd.1	Ylpm1
chr7	148412686	148448650	uc009kkb.1	Phrf1
chr9	44219442	44228090	uc009pdq.1	Ccdc84
chr2	131733663	131764167	uc008mlz.2	Prnp
chr11	97642647	97645571	uc007lev.1	Rpl23
chr12	70258708	70262173	uc007nrp.2	Rps29
chr6	142438768	142458463	uc009epj.1	Ldhb
chr17	24822036	24828894	uc008axq.1	Syngr3
chr7	87020210	87067526	uc009hzf.2	Ap3s2
chr16	33379940	33382813	uc007zaa.1	AK160141
chr11	94513104	94521401	uc007kzg.1	Mrpl27
chr13	95744302	95793269	uc007rlz.1	Wdr41
chr1	23373262	23392014	uc007amb.1	Ogfrl1
chr19	36998568	37088547	uc008hhw.1	Btaf1
chr4	33257381	33278712	uc012dbj.1	Pm20d2
chr12	72036843	72065704	uc007nty.2	Actr10
chr10	127518362	127527444	uc007hle.1	Atp5b
chr16	98179504	98185793	uc008ady.1	AK170928
chr2	30661496	30673032	uc008jcu.1	Mettl11a
chr3	40437688	40508662	uc008pbh.1	Intu
chr17	25031444	25034474	uc008ayz.2	Nme3
chr7	128100549	128127826	uc012ftc.1	Cdr2
chr7	144084293	144319871	uc009keq.1	Mgmt
chr2	71289394	71363248	uc008kas.1	Metap1d
chr11	54677939	54683998	uc007iyj.1	Hint1
chrX	147079845	147093979	uc009uoq.1	Tro
chr5	115390210	115398549	uc008zcy.1	2210016L21Rik
chr6	47769264	47782504	uc009btg.1	Zfp786
chr7	34894566	34920287	uc009gis.1	Wtip
chr6	13530688	13560063	uc009ayn.1	Tmem168
chr10	77066978	77081076	uc007fvy.1	Sumo3
chr14	79824317	79830845	uc007usy.1	Kbtbd7
chr11	29071330	29075558	uc011xsp.1	A630052C17Rik
chr14	62948941	62991829	uc007ugl.1	Rnaseh2b
chr10	7510691	7542361	uc007eip.2	Ppil4
chr8	73037294	73049079	uc009man.2	2810422J05Rik
chr9	66791924	66797316	uc009qfm.1	Rps27l
chr5	8986180	8999042	uc008wku.1	Crot
chr7	71521426	71539122	uc009hgg.1	Mphosph10
chr11	44268072	44286050	uc007ing.2	Ublcp1
chr8	80071295	80087877	uc009mhp.1	Prmt10
chr10	114726917	114754647	uc007haz.1	Rab21
chr4	155241675	155263212	uc008wfh.1	Cpsf3l
chr17	33978035	33986719	uc008bzv.1	Cd320
chr15	76732500	76736748	uc007wmt.2	Rpl8
chr9	107771171	107777130	uc009rnf.1	AK078712
chr8	88078099	88081267	uc009mqb.1	AK163592
chr8	74044018	74051592	uc009mdq.1	AK141396
chrX	72625737	72642497	uc009tpu.2	Fundc2
chr2	150610531	150657484	uc008mul.1	Pygb
chr3	135069375	135088397	uc008rlk.2	Cisd2
chrX	75007373	75043299	uc009tqp.1	Prkx
chr8	82207340	82237639	uc009mit.1	Abce1
chr8	24283417	24320925	uc009leo.2	Agpat6
chr3	95974472	95981487	uc008qme.1	Sf3b4
chr12	56935352	56970722	uc007npa.1	Brms1l
chr4	129993328	130039190	uc008uze.1	Zcchc17
chr14	56289071	56297588	uc007uae.1	Gmpr2
chr17	26811340	26836591	uc008bei.1	Atp6v0e
chr7	17079821	17202342	uc009fhw.1	Grlf1
chr3	88353740	88358849	uc008pvo.1	Robld3
chr2	163449008	163472879	uc008ntg.2	Serinc3
chr15	98734351	98750529	uc007xoi.1	Lmbr1l
chr4	21684528	21696358	uc008scx.2	2610029I01Rik
chrX	67637087	67642591	uc009tjf.1	1110012L19Rik
chr17	23808574	23812491	uc008asu.1	Hcfc1r1
chr3	144231390	144260640	uc008rpr.1	2017-09-15
chr17	33959558	33975258	uc008bzu.1	Ndufa7
chr2	33069480	33103234	uc008jhr.1	Angptl2
chr11	69499741	69511600	uc007jri.2	Tnfsf12
chr9	108983009	108995877	uc009rrx.2	Ccdc51
chr4	134453763	134472831	uc008vfv.1	Tmem50a
chr7	17589989	17615263	uc009fiq.2	Ppp5c
chr6	131234406	131245262	uc009eiq.1	Magohb
chr1	24002777	24014479	uc007amj.2	1110058L19Rik
chr4	106728478	106741471	uc008tza.2	Mrpl37
chr10	70793241	70809597	uc007foq.1	Cisd1
chr4	135531516	135545159	uc012dnd.1	1110049F12Rik
chr2	30678617	30685820	uc008jcx.1	Asb6
chr17	36051855	36069228	uc008cjj.2	Ppp1r10
chr4	147963621	147968728	uc008vuw.1	Srm
chr2	29887077	29906399	uc008jau.1	Wdr34
chr14	9045015	9056083	uc007sex.2	Kctd6
chr10	62232568	62257116	uc007fjc.2	Ccar1
chr18	68419838	68461987	uc008fni.1	4933403F05Rik
chr12	70471136	70476967	uc007nsj.1	Arf6
chr15	76283425	76309699	uc007wkf.1	Bop1
chr5	147642770	147648608	uc009anl.2	Rpl21
chr10	80258843	80263371	uc007ger.1	Plekhj1
chr2	52997508	53052221	uc008jrk.1	Prpf40a
chr3	87662824	87691484	uc008ptb.2	Prcc
chr9	108190787	108198827	uc009rpb.1	Nicn1
chr3	32633984	32650481	uc008owq.1	Ndufb5
chr7	125854124	125880532	uc009jkj.1	6330503K22Rik
chr5	112766410	112774060	uc008ysz.2	Srrd
chr12	106268826	106272489	uc007oxt.2	Snhg10
chr9	72827532	72835183	uc009qqk.2	Gm5918
chr13	53204685	53383478	uc007qnj.1	Ror2
chr8	111236543	111485536	uc009nid.1	Zfhx3
chr7	29525009	29538874	uc009fzq.2	Sars2
chr13	21811966	21814347	uc007prd.1	Hist1h2bm
chr4	133683320	133686668	uc008vec.1	Sh3bgrl3
chr10	127757514	127764243	uc007hmi.1	Cnpy2
chr12	21320252	21329468	uc007ndt.1	Iah1
chr15	5064612	5069140	uc007vcs.2	Rpl37
chr18	36830812	36841020	uc008enz.1	Apbb3
chr5	130160469	130177963	uc008zta.1	Zfp11
chr9	108562428	108586972	uc009rqs.1	Slc25a20
chr4	128865038	128896851	uc008uwk.2	Yars
chr4	140255387	140279135	uc008vna.2	Rcc2
chr8	89247836	89271905	uc009mqn.2	Siah1a
chr7	148631548	148637241	uc009klf.1	Rplp2
chr5	108739943	108777798	uc008ynu.1	Pigg
chr3	98184403	98235872	uc012cui.1	Zfp697
chr15	80091043	80096736	uc007wvm.1	Rps19bp1
chr11	19822444	19922600	uc007icr.1	Spred2
chr11	48619905	48632893	uc007ipc.1	Trim41
chr7	63303524	63487168	uc009hdv.1	Herc2
chr12	81562081	81599122	uc007oas.2	Exd2
chr6	86625162	86636485	uc009csj.1	Snrnp27
chr17	34727415	34734286	uc008ccv.1	Pbx2
chr10	79420896	79425100	uc007gas.1	Wdr18
chr18	50285992	50355920	uc008eww.1	Hsd17b4
chr17	24561627	24576261	uc008avv.2	Dci
chr5	114292447	114360715	uc008yyu.1	Coro1c
chr16	35694988	35771442	uc007zbo.1	Dirc2
chr4	137416151	137521144	uc008vju.2	Ece1
chr5	122870452	122894920	uc008zlh.2	Anapc7
chrX	148434438	148438985	uc009upu.1	Hsd17b10
chr18	34602004	34668477	uc008eko.1	Fam13b
chrX	7417207	7453746	uc009smw.1	Otud5
chr7	144627330	144658648	uc009kew.1	Glrx3
chr4	123389952	123397429	uc008upu.1	Ndufs5
chr4	48206202	48294461	uc008suy.1	Erp44
chr12	101120724	101193426	uc007osg.2	Tdp1
chr5	97424707	97520067	uc008yfp.1	Bmp2k
chr1	167389338	167411345	uc007djd.1	Brp44
chr18	80389002	80399358	uc008fsm.1	Rbfa
chr4	118897742	118907329	uc008ulo.2	AU022252
chr5	137427144	137442104	uc012eeu.1	Fis1
chr8	74657190	74677028	uc009mfi.1	Tpm4
chr7	138077716	138129172	uc009kau.2	Htra1
chr2	126929545	126961690	uc008met.2	Ncaph
chr5	124943088	124983400	uc008zpz.1	Rilpl1
chr6	97158785	97183309	uc009dar.1	Arl6ip5
chr10	43244926	43262800	uc007ezk.1	1700021F05Rik
chr8	87480508	87491910	uc009mok.1	Rnaseh2a
chr5	114183790	114190616	uc008yyl.2	Ficd
chr14	120672890	120792498	uc007uzq.1	Mbnl2
chr2	129624252	129658021	uc008mie.2	Stk35
chr8	127534896	127558092	uc009nya.1	Tsnax
chr17	47736279	47750441	uc008cvq.2	Bysl
chr8	90640657	90655586	uc009mqx.2	Tmem188
chr4	41659064	41662549	uc008sjh.2	2810432D09Rik
chr1	93272407	93297360	uc011wpg.1	Ilkap
chr5	116079995	116097167	uc008zei.1	Rab35
chr2	155949372	155971922	uc008nmj.2	Nfs1
chr13	115078002	115180302	uc007rxm.2	Ndufs4
chr11	86902657	86924216	uc007kth.2	Prr11
chr17	24299186	24302700	uc008auo.1	Amdhd2
chr17	25958571	25965675	uc008bcd.2	Wdr24
chr13	97418918	97442891	uc007rnm.2	Hmgcr
chr10	43619612	43667668	uc007ezp.1	Rtn4ip1
chr3	96381796	96400081	uc008qnf.2	Polr3gl
chr11	63890985	63896761	uc007jkq.2	2810001G20Rik
chr7	69562478	69567025	uc009hfi.1	Mkrn3
chr13	24891525	24904768	uc007pwi.1	BC005537
chr10	126493105	126499240	uc007hhu.1	2017-03-09
chr7	99886167	99891969	uc012fpb.1	AK084903
chr1	36526441	36565621	uc007aqg.2	Cnnm4
chr2	105540265	105746657	uc008lld.1	Elp4
chr7	128785534	128852767	uc012ftd.1	Usp31
chr5	31505040	31524918	uc008wxr.1	Ppm1g
chr2	150572816	150589087	uc008muj.2	Entpd6
chr8	23301331	23329069	uc009lct.1	Vps36
chr11	54249680	54331743	uc007ixx.2	Fnip1
chr2	92243803	92276226	uc008kxy.2	Cry2
chr1	89650645	89665975	uc007bxj.1	APG16L
chr10	80364107	80382990	uc007gfk.1	Lmnb2
chr13	21824964	21827276	uc007pre.1	Hist1h4j
chrX	99312803	99323012	uc009tyj.1	Pin4
chr19	42162924	42196708	uc008hng.1	Pi4k2a
chr18	60718439	60729962	uc008fal.1	Rbm22
chr3	107079775	107086999	uc008qww.2	Hbxip
chr8	75018457	75074209	uc009mgg.2	Med26
chr4	8460790	8534849	uc008rxw.1	Rab2a
chr19	6239667	6262304	uc008ghu.1	Atg2a
chr14	79246984	79602117	uc007usq.2	1300010F03Rik
chr18	36672332	36677459	uc008enm.2	Hbegf
chr11	101301558	101306910	uc007low.2	Rpl27
chr4	155175726	155182938	uc008weu.1	Mrpl20
chr13	93612741	93628185	uc011zct.1	Mtx3
chr8	109570189	109574514	uc009ngx.2	Pdf
chr15	97871659	97925468	uc007xlr.2	Senp1
chr3	96071622	96074115	uc008qmp.1	Hist2h2bb
chr7	54245765	54265784	uc009gzx.2	Spty2d1
chr7	28230996	28251000	uc009fwd.1	Blvrb
chr15	65616602	65705374	uc007vzu.1	Efr3a
chr4	154528183	154598644	uc008wcz.1	Ski
chr4	125856029	125881954	uc008usx.1	Thrap3
chr11	97522725	97546772	uc007lei.1	Mllt6
chr7	129300950	129313389	uc009jop.1	Plk1
chr9	107998352	108094714	uc009rov.1	Bsn
chr2	127617113	127620224	uc008mgc.2	1500011K16Rik
chr13	69946759	69954972	uc007rcq.1	Med10
chr13	91936137	91949301	uc007rkb.1	Zcchc9
chr7	129274554	129292558	uc009jon.2	Dctn5
chr8	67196941	67214375	uc009lux.1	Sc4mol
chr5	118693235	118713123	uc008zgj.1	2410131K14Rik
chr13	113448973	113528960	uc007rwo.2	Slc38a9
chr13	55814010	55827588	uc007qry.1	Txndc15
chr6	70732073	70744169	uc009cfz.1	Rpia
chr2	105226104	105241476	uc008lks.1	Rcn1
chr4	129275445	129279892	uc008uxn.2	Eif3i
chr3	93322417	93330210	uc008qfj.1	S100a11
chr15	79504679	79520302	uc007wue.2	Josd1
chr4	133162906	133191344	uc008vde.1	Zdhhc18
chr5	3639960	3649936	uc008whh.2	Gatad1
chr5	125341074	125369000	uc008zqs.1	Zfp664
chr15	57701056	57725973	uc007vsq.1	Derl1
chr2	118301578	118307432	uc008lsa.1	Srp14
chr5	135056559	135074198	uc008zwl.1	Rfc2
chr11	120643828	120650416	uc007muq.1	Gps1
chr14	27455682	27476744	uc007sta.1	Arf4
chr1	132611903	132618634	uc007cmh.2	Yod1
chr2	52253470	52282394	uc008jqy.1	Arl5a
chr2	144423688	144594483	uc008mro.2	Dtd1
chr15	80002150	80045949	uc007wvf.1	Mgat3
chr8	112195227	112219194	uc009niy.2	2400003C14Rik
chr11	98722911	98766892	uc007lht.2	Wipf2
chr9	57392074	57402559	uc009pvd.1	Mpi
chr13	46844456	47027087	uc007qhn.1	Kif13a
chr14	52914516	52926799	uc007tpc.1	Mettl3
chr11	80173993	80193517	uc007klv.2	5730455P16Rik
chr11	63776128	63894974	uc007jko.2	Cox10
chr11	121096549	121117170	uc007mvq.2	Narf
chr9	20690708	20696622	uc012goy.1	AK085695
chr16	70312331	70569961	uc007zqu.1	Gbe1
chr5	136252518	136266256	uc008zyz.1	Mdh2
chr9	59385473	59412912	uc009pxw.1	Hexa
chr19	21671802	21729281	uc008gyz.1	1110059E24Rik
chr11	84797989	84955457	uc007krh.1	Usp32
chr7	107639853	107650682	uc009inb.2	Ucp2
chr14	51385089	51407193	uc007tlm.1	Ttc5
chrX	150156096	150175839	uc009ura.2	2210013O21Rik
chr11	31565149	31573862	uc007iim.1	Bod1
chr17	35970864	35977246	uc008ciq.2	Tubb5
chrX	99338158	99354430	uc009tyk.2	Ercc6l
chr4	44992282	45003568	uc008ssb.1	Grhpr
chr15	52899817	53179738	uc007vrh.1	Ext1
chr19	8954503	8957423	uc008gnr.2	AI462493
chr17	47728415	47735123	uc008cvo.1	Ccnd3
chr2	144368000	144378595	uc008mri.1	Rbbp9
chr11	78638096	78657401	uc007kkb.2	1810012P15Rik
chrX	104978090	105013673	uc009ucj.2	2610002M06Rik
chr19	30103002	30168214	uc008hei.1	Uhrf2
chr18	75176425	75446620	uc008fpz.1	Dym
chr7	16523184	16533457	uc009fgr.2	Gltscr2
chr2	152510883	152513678	uc008nge.1	Mcts2
chr4	129269217	129279892	uc008uxm.2	Eif3i
chr4	117347290	117356830	uc008uiw.1	Dmap1
chr4	133138287	133147650	uc008vdb.2	Gpn2
chr16	30955588	31083518	uc007yxa.2	AI480653
chr15	89184201	89188265	uc007xgj.1	AK012142
chr7	4742566	4746149	uc009eys.1	Rpl28
chr7	116660708	116665883	uc009jdr.1	Rpl27a
chr16	48992300	49019818	uc007zkb.1	C330027C09Rik
chr15	81294745	81306799	uc007wwq.1	Rbx1
chr3	132752916	132773949	uc008rkj.1	Ints12
chr4	153347669	153381334	uc008wax.1	BC046331
chr6	147037596	147061300	uc009esu.1	Klhdc5
chr17	13107278	13110334	uc008alk.1	AK163149
chr2	32780739	32818771	uc008jhd.1	Lrsam1
chr10	60895244	60917417	uc007fga.1	Eif4ebp2
chr18	67622502	67640235	uc008fmk.1	Slmo1
chr10	7625445	7677921	uc007eir.2	Tab2
chr6	8157226	8186273	uc009axk.2	Mios
chr9	62727883	62830686	uc009qas.1	Pias1
chrX	93289383	93363892	uc009tug.1	Msn
chr11	32353371	32418709	uc007ijr.1	Ubtd2
chr5	130487372	130502201	uc008zty.1	Asl
chr7	88936959	88976317	uc009icn.1	Btbd1
chr10	80169722	80206956	uc007gek.1	Ap3d1
chr3	102797662	102807837	uc008qsf.1	Sike1
chr17	56750817	56753669	uc008dcn.2	Rpl36
chr19	61300304	61306321	uc008icj.2	Csf2ra
chr7	125274825	125389151	uc009jjp.1	Smg1
chr2	179904292	179910988	uc008oin.1	Adrm1
chr11	115463464	115468938	uc007mia.1	Mrps7
chr14	32513200	32645601	uc007sya.1	Ankrd28
chr5	37138612	37141918	uc008xez.1	Cno
chr11	120343982	120350068	uc007mta.1	Mrpl12
chr6	38499443	38507918	uc012ekd.1	Luc7l2
chr11	120687855	120796186	uc007muv.1	Ccdc57
chr14	65441054	65570684	uc007uir.1	Hmbox1
chr11	94152452	94185225	uc007kyh.1	Luc7l3
chr11	4601970	4606347	uc007hvb.1	Uqcr10
chr9	78021720	78026686	uc009qtx.1	AK050586
chr15	88929527	88955580	uc007xfh.2	Tubgcp6
chr4	140796798	140813477	uc008vob.1	Arhgef19
chr7	54144396	54177300	uc009gzq.1	Tsg101
chr2	118843514	118857129	uc008lsx.2	Ccdc32
chr8	109553225	109569656	uc009ngv.1	Vps4a
chr12	3424883	3506849	uc007mwq.1	Asxl2
chr12	106921561	106941267	uc007oys.1	4933433P14Rik
chr13	95556897	95612854	uc007rlx.1	Tbca
chr2	19577688	19582217	uc008imj.2	Otud1
chr11	120580781	120585283	uc007mug.1	Rac3
chrX	7272259	7287385	uc009sma.1	Gpkow
chr17	25403521	25412859	uc008bal.2	Ube2i
chr17	12310149	12412506	uc008akm.1	Agpat4
chr11	51575164	51605455	uc007iup.2	Sar1b
chr2	84665177	84670370	uc008kjh.2	Timm10
chr4	106906118	106928138	uc008tzm.1	Lrrc42
chr7	88136569	88190048	uc009ibp.2	Zfp592
chr7	59115948	59119637	uc012flg.1	Fancf
chr11	121280686	121292082	uc007mvv.2	Fn3krp
chr1	88254148	88264539	uc011woj.1	C130036L24Rik
chr7	25667732	25674821	uc009fqs.1	Rps19
chr7	25182646	25207796	uc009fpn.1	1500002O20Rik
chr4	117880817	117966002	uc008ujq.1	Ptprf
chr13	47136907	47179982	uc007qht.2	Kdm1b
chr15	102537207	102554609	uc007xws.2	Calcoco1
chr4	107576586	107598194	uc008uan.2	Cpt2
chr2	156663812	156681267	uc008nny.1	Tgif2
chr11	49986352	50013617	uc007irv.2	3010026O09Rik
chr4	155076923	155090787	uc008wej.2	Ssu72
chr11	120532286	120570760	uc007mua.2	Aspscr1
chr16	91925467	91933875	uc007zys.1	Atp5o
chr8	73392125	73399389	uc009mby.1	Ccdc124
chr8	41595136	41636488	uc009lmy.1	Vps37a
chr7	72016535	72019926	uc009hgm.1	Ndnl2
chr12	21421771	21425664	uc007ndz.1	AK133650
chr7	16681991	16703324	uc009fgw.1	Napa
chr16	3861543	3874374	uc007xyu.1	Zfp597
chr15	102107886	102112175	uc007xve.1	Mfsd5
chr10	118296404	118307959	uc007hea.1	Dyrk2
chrX	82817360	82879808	uc009trt.2	Tab3
chr4	147389460	147400324	uc008vtt.1	Clcn6
chr6	115757992	115760121	uc012eqp.1	Snora7a
chr15	78763362	78772340	uc007wrw.1	Nol12
chr9	62187149	62226609	uc009qah.2	Anp32a
chr4	155184597	155198652	uc008wex.1	Ccnl2
chr11	59019862	59024236	uc007jdl.1	2310033P09Rik
chr16	37647687	37656454	uc007zei.1	Ndufb4
chr1	36756046	36768770	uc007aqx.1	Actr1b
chr9	43029360	43049899	uc009pbf.1	Oaf
chr9	120035375	120041487	uc009scf.1	Rpsa
chr4	139176808	139205606	uc012dnu.1	Aldh4a1
chr9	30957141	31021400	uc009orm.1	Aplp2
chr18	38407902	38415635	uc008ery.2	0610009O20Rik
chr3	85773328	85884359	uc008pqy.1	SH3d19
chr10	77083065	77108735	uc007fwa.1	Ube2g2
chr6	6508274	6530658	uc009aws.1	Shfm1
chr3	88126944	88132553	uc008pup.1	0610031J06Rik
chr12	112531182	112617929	uc007pct.2	Cdc42bpb
chr8	86130073	86135802	uc009mkp.2	Dnajb1
chr11	97576470	97608018	uc007leq.1	Pip4k2b
chr2	84511473	84520331	uc008kix.1	Tmx2
chr16	20546675	20561676	uc007ypz.1	Abcf3
chr2	118685735	118707093	uc008lsv.1	Ivd
chr1	64726444	64739233	uc007bgw.1	AK013046
chr4	132409978	132442373	uc008vbx.1	Stx12
chr3	51209400	51214877	uc008pdy.1	Ndufc1
chr2	73746506	73751351	uc008kdm.1	Atp5g3
chr6	35458823	35491888	uc009bit.2	Mtpn
chr10	80781847	80788996	uc007ghf.2	2510012J08Rik
chr11	78380669	78512927	uc007kjw.1	Nlk
chr3	108237314	108250087	uc008qzc.1	Sars
chr14	65975512	66017767	uc007ujg.2	Zfp395
chr11	98541867	98557292	uc007lgx.1	Psmd3
chr10	96077634	96085445	uc007gww.2	Btg1
chr15	79176107	79189506	uc007wth.1	Maff
chr11	98854260	98887503	uc007lid.1	Top2a
chr16	20670821	20683989	uc007yqu.1	Eif4g1
chr5	37186105	37189993	uc008xfa.2	Mrfap1
chr8	87548731	87554185	uc009moy.1	2310036O22Rik
chr19	59370573	59422270	uc008ibj.2	Pdzd8
chr12	73635343	73681200	uc007nvr.1	1810048J11Rik
chr13	29417174	29949457	uc007pyn.1	Cdkal1
chr17	21868690	21885936	uc012aln.1	Zfp229
chr11	4980080	5001080	uc007hvz.1	Ewsr1
chr9	108708710	108720697	uc009rqz.1	Nckipsd
chr17	32419733	32435634	uc012aow.1	AK159351
chr11	100627645	100634271	uc007lmh.1	Ghdc
chrX	101475903	101611185	uc009uaf.2	Abcb7
chr7	134918902	134943633	uc009jwt.1	Setd1a
chr15	82983931	83004638	uc007xac.1	Cyb5r3
chr8	124965591	124969813	uc009nsu.1	AK209590
chr13	23643200	23645512	uc007pua.1	Hist1h4f
chr7	53287065	53339582	uc009gyb.2	Nomo1
chr17	25397455	25412859	uc008bai.2	Ube2i
chr8	86656726	86673652	uc009mma.1	Cc2d1a
chr2	34749274	34771496	uc008jjh.1	Phf19
chr11	5727862	5740019	uc007hxf.2	Polm
chr16	16894561	16927468	uc007yjo.2	Ppm1f
chr12	4232062	4240123	uc007mxq.1	BC067010
chr9	107642825	107675333	uc009rmz.2	Rbm5
chr6	86352212	86367985	uc012eok.1	Tia1
chr11	94418415	94465100	uc007kzc.1	Acsf2
chr9	61761089	61764317	uc009pzt.1	Rplp1
chr9	22252755	22274800	uc009ooq.2	rp9
chr3	96024377	96026767	uc008qmi.1	Hist2h2ac
chr1	176429955	176752860	uc007dtd.2	Fmn2
chr4	151363739	151372288	uc008vyx.2	Phf13
chr13	23661268	23663883	uc007pue.2	Hist1h2bg
chr17	24830135	24835101	uc008axr.1	Gfer
chr9	106789745	106796269	uc009rku.1	Manf
chr6	124778193	124783719	uc009dsc.2	Cdca3
chr13	55826728	55878191	uc007qrz.1	Pcbd2
chr6	119427685	119433904	uc009dmj.2	Fbxl14
chr19	32747052	32788788	uc008hfo.1	Atad1
chr4	63203798	63211735	uc008tgq.2	Atp6v1g1
chr10	3132303	3227479	uc007efb.1	Cnksr3
chr13	23623779	23626172	uc007ptw.1	Hist1h2af
chr2	166617266	166624992	uc008nyq.1	Trp53rk
chr19	55325858	55371118	uc008hxp.1	Acsl5
chr1	184693036	184825785	uc007dyk.1	Susd4
chr15	58763364	58771044	uc007vtw.1	Ndufb9
chr5	17770952	17868231	uc008wns.1	Gnai1
chr7	31091771	31099322	uc009geb.1	Alkbh6
chr3	108705724	108716622	uc008qzx.1	Prpf38b
chrX	34727583	34733233	uc009syi.1	Ndufa1
chr10	127174593	127184395	uc007hkl.1	Zbtb39
chr9	20445761	20451233	uc009ojc.1	Ubl5
chr6	72546621	72557482	uc009cix.1	Retsat
chr6	120312116	120394592	uc009dne.2	Kdm5a
chr18	74936865	74965861	uc008fpt.1	Acaa2
chr10	44785019	44878801	uc007ezx.1	Prep
chr14	70983101	71001642	uc007uol.2	Fam160b2
chr2	119498803	119561143	uc008lue.2	Rtf1
chr13	53002415	53027046	uc007qnf.1	Auh
chr4	40214611	40217973	uc008shj.1	AK008077
chr5	150478831	150565174	uc009aqc.1	B3galtl
chr5	74396061	74466436	uc008xtg.1	Usp46
chr2	156213798	156220715	uc012chs.1	2900097C17Rik
chr7	134730211	134747119	uc009jwe.2	Rnf40
chr6	34424355	34455610	uc009bhg.1	Bpgm
chr11	62214884	62272834	uc007jjd.1	Ncor1
chr15	75584876	75674338	uc007whf.1	Zc3h3
chr13	49434917	49482394	uc007qji.1	Bicd2
chr1	52899889	52977704	uc007ayp.1	Hibch
chr5	46059163	46091786	uc008xjf.2	Ncapg
chr9	53343151	53383732	uc009pmf.1	Npat
chr15	82180568	82186721	uc007wzc.2	Ndufa6
chr13	23644900	23649877	uc007pub.2	Hist1h1d
chr9	119834790	119848676	uc009sbq.1	Gorasp1
chr6	56662898	56711905	uc009cbl.2	Avl9
chr17	45690664	45700117	uc008cqv.1	Nfkbie
chr5	115262808	115265985	uc008zai.2	1500011B03Rik
chr5	135642241	135657722	uc012een.1	Bcl7b
chr1	90155430	90176154	uc007bym.2	Hjurp
chr2	172845402	172860232	uc008odh.1	Rbm38
chr5	66006498	66091095	uc008xnw.1	Pds5a
chr1	121366881	121403359	uc007cis.2	Ralb
chr7	50697512	50713152	uc009gmt.1	Etfb
chr5	75402448	75442651	uc008xtw.1	Chic2
chr5	139624176	139662459	uc009afz.1	Heatr2
chr1	152237967	152297065	uc007cyb.2	Tpr
chr10	12726255	12728989	uc007eki.2	Sf3b5
chr5	108888350	108932118	uc008yoe.1	Pcgf3
chr10	80530827	80545105	uc007gfv.2	Thop1
chr5	100463739	100470241	uc008ygz.1	Hnrpdl
chr3	129686102	129765825	uc008rit.1	Sec24b
chr5	148670203	148684639	uc009aoj.1	Pomp
chr11	118162374	118218725	uc007mow.1	Timp2
chr6	147422392	147581134	uc009esy.1	Ccdc91
chr16	91646068	91663563	uc007zxy.1	Son
chr17	26228689	26234415	uc008bdh.1	Nme4
chr19	46075967	46080663	uc008hrx.2	Hps6
chr14	21852963	21873664	uc007sla.2	Ap3m1
chr3	32233715	32266587	uc008owc.1	Zmat3
chr3	100366126	100491396	uc008qqw.2	Man1a2
chr3	97815460	97954290	uc008qpo.1	Notch2
chr17	57160471	57172930	uc008ddr.2	Khsrp
chr11	83753591	83776588	uc007kpz.2	Ddx52
chr13	100787948	100876025	uc007rqc.1	Bdp1
chr14	61984022	62060784	uc007ufw.2	Kpna3
chr6	50512561	50518473	uc009bxc.1	Cycs
chr16	17280443	17408407	uc007ykr.2	Pi4ka
chr9	102526625	102536574	uc009rft.2	Anapc13
chr7	148039282	148044282	uc009kii.2	Bet1l
chr19	4007504	4014725	uc008fye.1	Ndufv1
chrX	7459369	7471153	uc009sna.1	Slc35a2
chr19	4190173	4195419	uc008fzg.1	Ppp1ca
chr11	29999394	30121772	uc007ihs.1	Spnb2
chr17	36972085	36991932	uc008clg.1	Trim26
chr10	126498658	126504338	uc007hhv.2	Cdk4
chr16	4616465	4626946	uc007xzx.1	Pam16
chr2	22972063	23013544	uc008iob.2	Mastl
chr14	47395241	47410032	uc007thg.2	Cnih
chr11	115869670	115876033	uc007mjn.1	Galk1
chr16	4626883	4681720	uc007xzy.1	Coro7
chr7	50815739	50830831	uc009gnb.1	Zfp658
chr11	99070361	99094331	uc007lii.1	Smarce1
chr1	173059287	173082734	uc007dnb.2	Sdhc
chr4	138009062	138016041	uc008vkz.2	Camk2n1
chr4	59592434	59631566	uc008szz.2	Hsdl2
chr14	73635697	73640165	uc007upq.2	Lpar6
chr19	45079047	45087252	uc008hqi.1	Peo1
chrX	98407299	98419902	uc009tww.2	Snx12
chr4	106849234	106873601	uc008tzj.2	Tmem59
chr11	86012871	86024191	uc007ksg.1	4632419I22Rik
chr1	181596361	181617315	uc007dvp.1	Sccpdh
chr7	36470518	36541473	uc009gkg.2	Dpy19l3
chr17	26916023	26929466	uc008ben.2	Bnip1
chr4	153383911	153395621	uc008way.1	Lrrc47
chr4	100824578	100939887	uc008tvk.1	Jak1
chr12	32016426	32038302	uc007nhg.2	Dld
chr9	113838646	113886319	uc012hbz.1	Ubp1
chrX	153985753	154038647	uc009usb.1	Mbtps2
chr4	45408795	45423638	uc008ssr.2	Mcart1
chr17	24859011	24863333	uc008ayd.1	Ndufb10
chr19	3321300	3385733	uc008fwf.2	Cpt1a
chr4	45004114	45027284	uc008ssd.1	Zbtb5
chr6	88453600	88470794	uc009cvi.1	Sec61a1
chr5	115119510	115142944	uc008yzw.1	Gltp
chr5	123676198	123700134	uc008znk.1	Psmd9
chr7	52271376	52277014	uc009gss.1	Rras
chr10	79577280	79593215	uc007gbu.1	Stk11
chr7	3579586	3583023	uc009evh.1	Prpf31
chr6	83297477	83308386	uc009cnh.1	Bola3
chr2	31005835	31072087	uc008jdp.2	Gpr107
chr5	30444843	30483520	uc008wvc.1	Hadha
chr11	5853760	5867783	uc007hxp.2	Ykt6
chr3	40622093	40652776	uc008pbp.1	Mfsd8
chr18	36718256	36818562	uc008env.2	Ankhd1
chr2	25186262	25207733	uc008irp.2	Man1b1
chr2	174286575	174291602	uc008off.1	Atp5e
chr5	33131855	33198879	uc008wzy.2	C330019G07Rik
chr16	62852159	62929166	uc007zpx.1	Pros1
chr19	5941104	5966206	uc008ggc.2	Pola2
chr7	85972359	85994097	uc009hxo.1	Det1
chr1	173996143	174014880	uc007dpk.2	Ncstn
chr2	121318416	121334392	uc008lzh.1	Mfap1a
chr7	31009149	31019048	uc009gds.2	Tbcb
chr14	122931549	123289166	uc007vbe.2	Pcca
chr13	70741056	70778512	uc007rcx.2	BC018507
chr14	60882064	60921207	uc007ufa.1	Mtmr6
chr8	107163738	107167628	uc009nba.1	Fam96b
chr6	47402322	47476138	uc009bta.1	Cul1
chr6	90317487	90335388	uc012eoy.1	Zxdc
chr12	8926112	8945547	uc007naf.1	Laptm4a
chr7	139749157	139770081	uc009kcb.1	Oat
chr10	70717727	70750010	uc007foo.2	Ube2d1
chr17	46631737	46636567	uc008csz.1	BC048355
chr7	25667653	25674821	uc009fqr.1	Rps19
chr18	32225387	32263985	uc008eiy.2	Iws1
chr3	96021838	96024231	uc008qmh.1	Hist2h2ab
chr13	69712326	69752341	uc007rck.1	Srd5a1
chr8	3498518	3515231	uc009krq.1	Mcoln1
chr14	54978524	54989353	uc007tvu.1	Oxa1l
chr13	108832667	108839340	uc007rut.1	2810008M24Rik
chr11	5603985	5609702	uc007hwt.1	Mrps24
chr3	90278122	90289384	uc008qci.1	Ilf2
chr5	77723193	77741111	uc008xwc.2	2610024G14Rik
chr4	131867677	131887453	uc008vbb.1	Trnau1ap
chr7	133837513	133840207	uc009jsj.1	Bola2
chr15	31152139	31204093	uc007vkc.2	Dap
chr18	77996305	78008519	uc008frs.1	Haus1
chr7	88927072	88936339	uc009icm.1	3110040N11Rik
chr9	107886554	107890247	uc009rnv.2	6230427J02Rik
chr4	59637092	59767175	uc008tab.1	E130308A19Rik
chr9	122975277	123024323	uc009sfp.2	GODZ
chr7	52969517	52976205	uc009gww.1	Rpl18
chr17	79232855	79247648	uc008dpf.2	Ccdc75
chr13	109104530	109179751	uc007rvc.1	Depdc1b
chr14	19036569	19073620	uc007shp.2	Nr1d2
chr11	118882342	118892584	uc007mpt.1	Cbx2
chr1	163746242	163808792	uc007dft.2	AI848100
chr11	6961491	7078508	uc007hzf.1	Adcy1
chr14	47427823	47443917	uc007thh.2	Gmfb
chr1	171879667	171901336	uc007dlp.1	Hsd17b7
chr11	102855369	102880461	uc007ltc.1	Dcakd
chr2	163294438	163300365	uc008nsv.1	Fitm2
chr8	125728160	125738688	uc009nuk.2	Chmp1a
chr10	55734099	55950495	uc007fca.1	D630037F22Rik
chr2	181303858	181318678	uc008oms.1	Uckl1
chr11	106644758	106651808	uc007lzs.1	Ddx5
chr10	50310474	50571008	uc007fak.2	Ascc3
chr8	74132922	74148810	uc009mee.2	Glt25d1
chr12	73751339	73767815	uc007nvs.2	Dhrs7
chr12	55959805	55965864	uc007nnx.1	Cfl2
chr14	70497951	70538013	uc007une.1	Bin3
chr11	59759715	59776808	uc007jfg.1	Med9
chr1	90594800	90600766	uc007byt.1	Arl4c
chr8	27091075	27106593	uc009lhh.1	4930444A02Rik
chr15	98395754	98401295	uc007xmx.2	9330020H09Rik
chr11	54530916	54603205	uc007iyf.2	Cdc42se2
chr10	17619889	17669873	uc007elw.1	Heca
chr3	88487715	88491984	uc008pwe.2	Kiaa0907
chr4	116665952	116677882	uc008uht.1	Hectd3
chr13	30749964	30802328	uc007pyx.1	Dusp22
chr14	56208626	56222508	uc007tzi.1	Rnf31
chr3	127239631	127258267	uc008rhd.1	Larp7
chr17	35398038	35404442	uc008chg.1	H2-D1
chr5	143633467	143658917	uc009aji.1	Fbxl18
chr7	25076064	25086568	uc009fpf.1	Zfp61
chr17	47830155	47841235	uc008cvz.1	Frs3
chr5	149138985	149213480	uc009aos.2	Slc7a1
chr3	137528638	137571895	uc008rmr.2	Dnajb14
chr4	43505656	43507931	uc008spx.1	Rmrp
chr2	101724418	101741796	uc008lhq.1	Commd9
chr19	10666686	10680763	uc008gql.1	Dak
chr14	55711620	55717832	uc007tyb.2	Thtpa
chr6	34657443	34725469	uc009bhk.1	Cald1
chr4	74923257	74926190	uc008tjk.1	3110001D03Rik
chr13	22125755	22128136	uc007psb.1	Hist1h2bk
chr11	76857793	76893937	uc007kgg.1	Ccdc55
chr8	113441764	113496397	uc009nlk.2	St3gal2
chr19	6080762	6086891	uc008ghg.1	Zfpl1
chr17	31655059	31668270	uc008bve.1	Ndufv3
chr18	84377093	84760896	uc008fuo.2	Zfp407
chr1	157403249	157534363	uc011wtw.1	Acbd6
chr15	76208942	76283469	uc007wkc.2	Heatr7a
chr12	86449807	86455027	uc007ogi.1	Dlst
chr2	25411419	25417602	uc008isn.1	Edf1
chr11	60965282	60990561	uc007jhc.2	Usp22
chr10	80845172	80851097	uc007ghu.2	Dohh
chr6	72295310	72303154	uc009cig.2	0610030E20Rik
chr6	124760609	124766314	uc012esp.1	Tpi1
chr7	106986078	107009393	uc009imd.1	Spcs2
chr11	69812127	69825803	uc007jtn.1	Dvl2
chr12	60165905	60172523	uc007nqa.1	Pnn
chr16	15635958	15842332	uc007yht.1	Prkdc
chr18	36902309	36917293	uc008eok.2	Ik
chr16	84772367	84823129	uc007ztg.1	Jam2
chr7	117159938	117198628	uc009jeu.1	Ipo7
chr11	86079216	86173027	uc007ksk.1	Med13
chr10	86153585	86170189	uc007gqi.1	Hsp90b1
chr15	76197327	76201841	uc007wjz.2	Brp16
chr18	38117087	38131385	uc008ero.1	Fchsd1
chr12	81208746	81216000	uc007oal.1	Zfp36l1
chr5	143664794	143670403	uc009ajk.1	Actb
chr13	25084351	25114248	uc007pwu.1	Mrs2
chr11	45741770	45760437	uc007ins.1	Lsm11
chr14	19115242	19166358	uc007shu.1	Ube2e1
chr7	3611708	3619442	uc009evm.1	Leng1
chr6	113464880	113483632	uc009dgu.1	Tmem111
chr7	104098036	104213267	uc009iiw.2	Nars2
chr12	71552140	71568611	uc007ntu.1	Tmx1
chr12	56590395	56595634	uc007nor.2	Nfkbia
chr11	102144590	102150738	uc007lrd.1	Tmub2
chr10	128114238	128135324	uc007hnv.2	Rab5b
chr8	124990046	125001964	uc009nsx.1	Rnf166
chr3	97542766	97573937	uc008qpg.1	Pde4dip
chr6	124660306	124663761	uc009drh.1	Phb2
chr5	108337060	108418096	uc008yni.2	Fam69a
chr18	57512386	57552373	uc008ezb.2	Prrc1
chr2	80153622	80194212	uc008khj.1	Dnajc10
chr4	104702254	104784503	uc008tyd.2	Prkaa2
chr17	84583268	84589287	uc008dsq.1	Zfp36l2
chr18	24643462	24690705	uc008egu.1	Rprd1a
chr12	112276008	112351597	uc007pck.1	Rcor1
chr3	113330770	113334201	uc008rbi.1	AK017534
chr17	25030064	25033703	uc008ayy.1	Mrps34
chr13	58498397	58505478	uc007qtz.1	Hnrpk
chr18	20975724	21056579	uc012bad.1	Trappc8
chr11	86024184	86073070	uc007ksj.1	Ints2
chr2	32424377	32429091	uc008jfu.1	Dpm2
chr19	40670935	40688705	uc008hla.1	Tctn3
chr12	60165905	60175004	uc007nqb.1	Pnn
chr11	5178605	5283743	uc007hwk.2	Znrf3
chr3	108481555	108527217	uc008qzo.2	Gpsm2
chr5	115223148	115255829	uc008zaf.1	Ankrd13a
chr5	115572574	115586984	uc008zdc.1	Unc119b
chrX	126282277	127000369	uc009uet.2	Diap2
chr13	64531860	64541029	uc007qyx.1	Cdk20
chr11	103081077	103130715	uc007lua.1	Map3k14
chr11	94070767	94076806	uc007kyf.1	Tob1
chr2	30816080	30825438	uc008jdc.2	Tor1a
chr4	88364195	88370412	uc008tnk.1	Klhl9
chr13	54721144	54745970	uc007qop.2	mKIAA0887
chr19	8965476	8972380	uc008gnu.2	Ints5
chr14	32062674	32073115	uc007sxh.1	Bap1
chr15	83314198	83343337	uc007xbc.2	Ttll1
chr6	128271178	128307869	uc009edh.1	Tulp3
chr15	43306774	43359323	uc007vpm.1	Ttc35
chr7	134340973	134353982	uc009juo.2	Tbc1d10b
chr2	146067034	146339740	uc008msj.2	Ralgapa2
chr14	119335153	119380924	uc007uzd.2	Dnajc3
chr14	56276715	56281345	uc007uaa.2	Mdp1
chr15	82946276	82955231	uc007wzy.2	Rrp7a
chr3	95019378	95030580	uc008qis.1	AK020406
chr7	52688208	52711987	uc009gve.1	Gys1
chr10	79753175	79756859	uc007gcn.2	Rps15
chr8	3674476	3680921	uc009ksk.2	Trappc5
chr2	49305005	49407129	uc008jpw.2	Epc2
chr19	4825365	4841322	uc008gba.1	Ccs
chr2	158179435	158189258	uc012cie.1	9430008C03Rik
chr5	134623927	134654637	uc008zvc.2	Wbscr16
chr13	23836910	23839390	uc007pur.1	Hist1h3c
chr5	145950296	145954411	uc009aml.1	AK164124
chr5	124564116	124568204	uc008zoz.1	Arl6ip4
chr9	21395165	21400391	uc009omb.1	1810026J23Rik
chr8	35198625	35211793	uc009lkp.1	Leprotl1
chr9	21526037	21545446	uc009omh.1	Ldlr
chr11	78355318	78366237	uc007kjv.1	Tmem97
chr8	72744091	72760321	uc009lzi.1	Armc6
chr11	102165873	102176807	uc007lri.1	Ubtf
chr11	70465348	70470152	uc007jvv.2	Pfn1
chr1	94828984	94844525	uc007cby.1	Capn10
chr6	113552765	113566945	uc009dgz.1	6720456B07Rik
chr15	38224167	38232462	uc007vnr.1	Klf10
chr17	46245952	46265857	uc008crs.1	Mrps18a
chr5	139813775	139823120	uc009agj.1	Cox19
chr16	20533576	20544126	uc007ypy.1	Ap2m1
chr4	135605862	135611286	uc012dne.1	Rpl11
chr8	107782474	107790494	uc009nby.1	Tradd
chr3	88334316	88345316	uc012crx.1	Mex3a
chr4	83107782	83134294	uc008tkx.1	Psip1
chr13	63612839	63668828	uc007qxv.1	Ptch1
chr11	83103200	83108139	uc007kom.2	AA465934
chr7	71430555	71485692	uc009hgd.1	Mtmr10
chr11	100270063	100278133	uc007lla.1	Leprel4
chr17	28463415	28467978	uc008bqq.2	Rpl10a
chr4	132086469	132091850	uc008vbl.2	Atpif1
chr11	98299021	98302302	uc007lgj.1	1810046J19Rik
chr14	22665082	22670132	uc007slt.1	Comtd1
chr9	20454573	20471028	uc009ojd.1	Pin1
chr8	35215616	35233901	uc012gci.1	Tmem66
chr15	36935337	36948474	uc007vnd.1	AK087460
chr7	19928419	19941873	uc009flm.2	Ercc1
chr9	103255431	103269309	uc009rgn.1	Cdv3
chr1	191464492	191513965	uc007eao.2	Cenpf
chr8	97603100	97623774	uc009mxt.1	Katnb1
chr4	115408677	115449932	uc008ufg.1	4732418C07Rik
chrX	71498177	71503086	uc009toa.1	Emd
chr5	147758232	147767190	uc009ano.2	Gtf3a
chr10	77042511	77061477	uc007fvx.1	Pttg1ip
chr11	20127039	20151427	uc007icw.1	Cep68
chr5	88992064	89080415	uc008xzx.1	Rufy3
chr10	127931212	127937741	uc007hne.1	Myl6b
chr7	26004469	26012524	uc009frw.1	Zfp526
chr6	113572014	113581627	uc009dha.1	Vhl
chr5	144078169	144092905	uc009ajz.1	Zdhhc4
chr11	94525160	94540807	uc007kzi.2	Xylt2
chr3	103716042	103770543	uc008qtx.1	Rsbn1
chr14	56281103	56292743	uc007uac.1	Nedd8
chr7	4736386	4743162	uc009eyr.1	2210411K11Rik
chr10	77624811	77634513	uc007fxj.1	D10Jhu81e
chr6	34830425	34862831	uc009bhz.1	Wdr91
chr10	67007258	67013703	uc007flz.2	Ado
chr16	92299547	92313286	uc007zyx.1	Fam165b
chr2	29920245	29927314	uc008jay.1	Set
chr4	154439138	154446515	uc008wcs.1	Pex10
chr13	23774067	23784349	uc007pul.1	Hist1h2bc
chr2	50985958	51006631	uc008jqf.1	Rnd3
chr7	3629390	3647127	uc009evq.1	Mboat7
chr5	115459532	115548799	uc008zda.1	Sppl3
chr14	31636779	31690396	uc007svt.2	Tmem110
chr10	80727466	80731671	uc007ggy.1	Mrpl54
chr6	72303476	72309756	uc009cih.1	Tmem150a
chr2	168054121	168057803	uc012cjs.1	Mocs3
chr10	80259479	80267667	uc011xiv.1	Sf3a2
chr12	114172943	114182329	uc007pfm.1	Nudt14
chr17	32902441	32927232	uc008bxm.1	Zfp871
chr10	79543154	79567447	uc007gbs.1	Sno
chr16	91727615	91871900	uc007zyi.2	Itsn1
chr6	57456495	57487420	uc009cch.1	Ppm1k
chr5	110790770	110879522	uc012ebb.1	Fbrsl1
chr17	37085299	37090737	uc008cln.2	Ppp1r11
chr1	191704370	191748167	uc007eax.1	Smyd2
chr1	84032867	84283220	uc007bst.2	Pid1
chr17	23693733	23703193	uc008asg.2	Zfp213
chrX	69060117	69070045	uc009tkf.2	Vma21
chr11	98442607	98450559	uc007lgr.1	Ormdl3
chrX	131282993	131287958	uc012hom.1	Armcx6
chr16	10833151	10843328	uc007yek.2	A630055G03Rik
chr18	60932249	60938200	uc008fay.2	Rps14
chr11	115279439	115292588	uc007mhn.2	Kctd2
chr13	21871751	21874423	uc007pri.1	Hist1h1b
chr17	35376690	35386815	uc008cgz.2	Bat1a
chr2	154480761	154520519	uc008njq.1	Chmp4b
chrX	162937746	162950410	uc009uwv.1	Tceanc
chr2	13993738	14069957	uc008ikh.1	Stam
chr6	24468665	24479687	uc009bbs.1	Ndufa5
chr3	94933640	94939934	uc012ctq.1	Scnm1
chr6	72362326	72380701	uc009cio.1	Ggcx
chr15	81678699	81690756	uc007wxm.1	Tob2
chrX	7170934	7184546	uc009sln.1	Ccdc22
chr11	5176331	5346850	uc007hwj.2	Znrf3
chr12	99983177	100025984	uc007org.1	Zc3h14
chr18	38096624	38116642	uc008erl.1	Hdac3
chr2	157102833	157152054	uc008now.1	Rpn2
chr15	58613823	58656982	uc007vto.1	Tmem65
chr12	25778663	25782957	uc007nfe.2	Id2
chr2	119371442	119412758	uc008ltw.1	1500003O03Rik
chr19	60837018	60868596	uc008ibx.1	Eif3a
chr11	105925420	105934926	uc007lyb.1	Taco1
chr18	32068747	32073557	uc008eiu.2	Sft2d3
chr5	115258204	115265985	uc008zah.2	2610524H06Rik
chr8	129112195	129119336	uc009nyw.2	Irf2bp2
chr2	121272963	121279162	uc008lzd.1	Serf2
chr1	121420743	121424803	uc007ciu.1	Tmem185b
chr12	3247427	3311969	uc007mwl.2	Rab10
chr2	38861658	38871392	uc008joa.1	Arpc5l
chr14	70116785	70134377	uc007ums.2	Chmp7
chr4	153531594	153536793	uc008wbm.1	Tprgl
chr13	5858734	5869639	uc007pjw.1	Klf6
chr7	29060724	29065148	uc012fgp.1	Eid2b
chr9	44410974	44441499	uc009pdy.2	Ddx6
chr12	77469252	77489734	uc007nyd.2	Zbtb1
chr3	19792870	19798984	uc012cnt.1	4632415L05Rik
chr2	152834625	152843119	uc008ngz.1	Pdrg1
chr15	76155826	76161100	uc007wjp.1	Exosc4
chr3	38348182	38385738	uc008pbd.2	Ankrd50
chr16	95922013	95942656	uc008ace.2	Ets2
chr7	29134558	29136652	uc012fgs.1	LOC100302567
chr9	110557006	110614097	uc009rum.2	Ccdc12
chr6	134396495	134518931	uc009ekl.2	Lrp6
chr9	65935933	65974693	uc009qek.1	Snx1
chr7	19607725	19617575	uc009fkf.2	Sympk
chr9	107442539	107448037	uc009rln.2	Nprl2
chr15	100590177	100654402	uc007xse.1	Slc4a8
chr3	132345107	132501470	uc012cxw.1	Tbck
chr11	115022654	115042492	uc007mgp.1	Slc9a3r1
chr18	61713235	61717892	uc008fcb.1	Csnk1a1
chr6	85535524	85652745	uc009cpz.1	Alms1
chr5	138223133	138229929	uc009ady.1	Mepce
chr11	105896185	105920637	uc007lxz.1	Dcaf7
chr4	137988586	137998180	uc008vky.1	Mul1
chr7	73252400	73318684	uc009hhb.1	Chsy1
chr3	96047460	96051219	uc008qmm.1	Hist2h3c1
chr10	79628585	79634398	uc007gce.1	Cirbp
chr2	179911077	179962564	uc008oip.1	Lama5
chr14	55048440	55060095	uc007twc.2	Mmp14
chr10	80029865	80042041	uc007gdt.1	Klf16
chr12	88221652	88227764	uc007oia.2	6430527G18Rik
chr7	6334027	6349347	uc009fbi.1	Zfp28
chr19	5386335	5390069	uc008gcv.2	D330050I16Rik
chr7	82598419	82899495	uc009hwx.2	Akap13
chr5	123437362	123448348	uc008zmw.1	AK079939
chr16	10959365	10995214	uc007yen.2	Litaf
chr8	126892948	126959836	uc009nxb.1	Pgbd5
chr17	5839379	5930711	uc008afj.1	Snx9
chrX	20279034	20297665	uc009stq.3	Usp11
chr4	116944068	116963377	uc008uim.1	Rnf220
chr4	141317912	141348559	uc008vpf.1	Dnajc16
chr4	135426840	135431761	uc008vhf.2	Pnrc2
chr5	31493676	31501273	uc008wxm.1	Snx17
chr4	141414056	141432835	uc008vpl.1	Efhd2
chr17	13135907	13155183	uc008alp.1	Acat2
chr14	106291163	106298036	uc007uxy.2	Spry2
chr15	88635672	88651748	uc007xeo.2	Alg12
chr8	93835423	94192332	uc009mst.2	Fto
chr4	47482704	47489239	uc008suq.2	Alg2
chr7	150399015	150484452	uc012fxx.1	Kcnq1ot1
chr4	140701836	140759977	uc008vnz.2	Fbxo42
chr7	53062006	53071686	uc009gxf.2	Cyth2
chr11	20723357	20733111	uc007idj.2	1110067D22Rik
chr11	51779132	51790838	uc007ius.2	Cdkn2aipnl
chr11	101832457	101848105	uc007lqa.2	Dusp3
chr1	167259631	167392594	uc007djb.2	Dcaf6
chr5	115783250	115793170	uc008zdr.1	Gatc
chr8	121866437	121872829	uc009npm.1	Hsbp1
chr4	125937648	125953127	uc008utc.1	Trappc3
chr8	87491546	87498212	uc009mom.1	Prdx2
chr12	85289557	85293903	uc007odz.2	2410016O06Rik
chr7	65911571	66084796	uc009hef.2	Atp10a
chr17	35996262	36002345	uc008cis.1	Nrm
chr2	91041068	91054255	uc008kvf.2	Acp2
chr15	12045605	12115205	uc007vhk.2	Zfr
chr13	42145389	42280395	uc007qfk.1	Hivep1
chr19	4425666	4441424	uc008gab.1	Rhod
chr11	74989444	75005985	uc007kdg.1	Dph1
chr4	43573505	43579932	uc008sqg.1	Creb3
chr7	149067489	149090311	uc009kmd.1	Tollip
chr8	87598933	87606645	uc009mph.1	Wdr83
chr5	138694709	138700623	uc009afd.2	0910001L09Rik
chr17	26336127	26340295	uc008bdp.1	Arhgdig
chr4	147808605	147820860	uc008vup.1	Ubiad1
chr1	74334820	74352910	uc007blv.2	Tmbim1
chr15	75746892	75753990	uc007whq.1	Pycrl
chr13	21877356	21881082	uc007prm.2	Hist1h2bp
chr7	135036576	135041131	uc009jxe.1	Vkorc1
chr4	129275950	129285123	uc008uxp.1	2510006D16Rik
chr4	132288880	132315086	uc008vbs.1	Smpdl3b
chr13	49061480	49065274	uc007qip.2	C030044B11Rik
chr12	4922158	5054216	uc007myu.1	Atad2b
chr17	6427259	6435443	uc008agq.1	Dynlt1b
chr8	72824683	72836889	uc009lzx.1	Cope
chr2	116945185	117005072	uc008lri.1	Spred1
chr16	17130230	17134476	uc007ykc.2	Sdf2l1
chr7	20091152	20095680	uc009fma.1	Bloc1s3
chr2	130730231	130856062	uc008mkc.1	Atrn
chr4	40088297	40146042	uc008shd.1	Aco1
chr1	186636946	186671726	uc007dyq.1	Mosc2
chr9	79616747	79643237	uc009quw.2	Tmem30a
chr10	127772887	127799535	uc007hmj.1	Cs
chr15	78969796	78982197	uc007wst.1	Polr2f
chr18	12348202	12396895	uc008ecb.1	Npc1
chr13	100191418	100288557	uc007rpr.2	Mtap1b
chr8	97854183	97871413	uc009myg.2	AA960436
chr5	114548341	114572933	uc008yzc.1	Usp30
chr15	102154546	102161920	uc007xvh.1	Pfdn5
chr3	32262410	32266360	uc012cok.1	4930429B21Rik
chr2	125126329	125334174	uc008mco.1	Fbn1
chr1	95649609	95686106	uc007cej.1	Atg4b
chr17	24300831	24308374	uc008aup.2	Atp6v0c
chr19	4146662	4154035	uc008fyy.1	Coro1b
chr11	101139283	101142262	uc007log.1	Ccdc56
chr19	46605598	46649575	uc008htt.1	Arl3
chr2	35891853	35906812	uc008jlb.1	Ndufa8
chr9	122758027	122777124	uc009sfe.2	Zfp445
chr13	23828675	23832236	uc007puq.2	Hist1h1c
chr11	101284398	101296979	uc007lov.2	Rundc1
chr11	117676832	117689328	uc007mnz.2	Tk1
chr6	86474264	86514443	uc009csd.1	BC029726
chr3	79407709	79434689	uc008pnq.2	Etfdh
chr8	27054930	27089216	uc009lhg.1	Hgsnat
chr5	36943137	37089208	uc012dvj.1	D5Ertd579e
chr4	45436147	45545700	uc008sst.2	Shb
chr5	115271945	115275477	uc008zau.1	2610524H06Rik
chr12	99440509	99499547	uc007olf.1	Galc
chr7	90778526	90790838	uc009idq.1	Stard5
chr19	40967194	40992437	uc008hlk.1	Zfp518a
chr10	42219859	42255175	uc007eyr.2	Snx3
chr8	86088656	86095522	uc009mkk.1	Ndufb7
chr13	8882851	8891642	uc007pkn.2	Idi1
chr5	138580929	138598972	uc009aeq.2	Zfp113
chr9	122858198	122927851	uc009sfl.1	Kif15
chr13	55445193	55466144	uc007qqo.1	Lman2
chr11	100818050	100833931	uc007lmr.1	Ptrf
chr7	50925400	50933667	uc009gnh.1	Ctu1
chr4	151305828	151350793	uc008vys.2	Dnajc11
chr9	121626298	121665959	uc009sdr.1	Nktr
chrX	20423668	20437647	uc009stu.2	Araf
chr9	72885536	72890582	uc009qqu.1	BC037369
chr5	130271433	130295129	uc008zth.2	Psph
chr7	39005672	39015013	uc009gku.2	Plekhf1
chr5	147194581	147282701	uc009anf.1	Wasf3
chr18	70725945	70785785	uc008fon.2	Mbd2
chr3	94912963	94926973	uc008qia.1	Vps72
chr19	7067508	7072527	uc008gjz.1	Nudt22
chr13	59921478	59926494	uc007qvh.1	Zcchc6
chr7	104518126	104540668	uc009ijc.2	Alg8
chr17	25975782	25983796	uc008bch.1	Rhot2
chr12	112949479	112972435	uc007pdu.2	2810002N01Rik
chr8	124405045	124433586	uc009nsc.2	Slc7a5
chr3	93357038	93368567	uc008qfk.1	S100a10
chr1	33802328	33816595	uc007any.1	Bag2
chr2	128435818	128515131	uc008mgq.2	Anapc1
chr4	108505282	108534724	uc008ubs.1	Txndc12
chr7	31401992	31413170	uc009gfl.1	Cox6b1
chr7	130112077	130146086	uc009joy.2	Rbbp6
chr12	60059370	60115004	uc007npw.1	Sec23a
chr9	67686202	67843441	uc009qms.1	Vps13c
chr1	174010659	174052463	uc007dpn.2	Copa
chr5	144163498	144182955	uc009akh.2	Kdelr2
chr6	90317487	90353480	uc009cxf.2	Zxdc
chr7	138532162	138555992	uc009kbj.1	Ikzf5
chr2	136907193	136944067	uc008moz.1	Jag1
chr9	65905975	65914436	uc009qei.1	Ppib
chr9	94418282	94440500	uc009rax.1	1190002N15Rik
chr3	67384689	67408153	uc008plp.1	Mfsd1
chr15	81700892	81745567	uc007wxp.1	Aco2
chr19	5488454	5494031	uc008gdq.2	Cfl1
chr9	108360848	108368276	uc009rpq.2	Ccdc71
chr17	34738043	34742506	uc008ccy.1	Rnf5
chr1	74329607	74334027	uc007bls.1	Pnkd
chr11	119951835	119962045	uc007mrs.1	2410002I01Rik
chr17	27700713	27704672	uc008bpe.1	AI413582
chr7	149717021	149726647	uc009kny.1	Mrpl23
chr10	33999995	34004691	uc007eut.2	Tspyl1
chr2	130387492	130391130	uc008mjf.1	Mrps26
chr4	135726308	135751971	uc008vht.2	E2f2
chr5	102261971	102500940	uc008yis.2	Wdfy3
chr15	32848477	32964476	uc007vkx.1	Sdc2
chrX	34333646	34338801	uc009sxs.1	Slc25a5
chr7	28269971	28275333	uc009fwh.1	Sertad1
chr7	34986345	35017324	uc009gix.2	Gpi1
chr18	24738381	24764318	uc008egv.1	Slc39a6
chr4	48135790	48199378	uc008sux.1	Stx17
chr9	66196256	66356582	uc009qev.2	Herc1
chr11	57613138	57624117	uc007jae.1	Sap30l
chr13	23662385	23665089	uc007pud.1	Hist1h2ae
chr10	75108854	75229102	uc007fqx.1	Cabin1
chr18	80241633	80316379	uc008fsj.2	Pard6g
chr11	3793242	3801299	uc007htu.2	Dusp18
chr10	59450656	59467860	uc007fef.1	Anapc16
chr2	151366234	151370413	uc008ndx.1	FKBP12-T1
chr12	117640419	117645634	uc007phs.2	D430020J02Rik
chr16	38445478	38454769	uc007zex.1	Adprh
chr4	155238831	155245549	uc008wfg.1	Gltpd1
chr4	148334643	148475921	uc008vvp.1	Pex14
chr7	28256858	28262383	uc009fwg.1	Sertad3
chr17	87832740	87848275	uc008dux.2	Calm2
chr12	81436833	81539588	uc007oar.2	Dcaf5
chr12	66163418	66176925	uc007nrb.1	Fkbp3
chr17	5410863	5442260	uc008afa.1	5730437N04Rik
chr7	4086657	4099775	uc009exc.1	Leng8
chr5	50351189	50452235	uc008xjz.2	Gpr125
chr14	70165278	70179493	uc007umu.2	Tnfrsf10b
chr4	116375038	116382990	uc008uhe.1	Mmachc
chr7	29170265	29179709	uc009fyt.2	Med29
chr13	23840956	23843462	uc007put.1	Hist1h2ab
chr12	86095508	86116062	uc007oft.1	Npc2
chr3	107466037	107501466	uc008qxj.1	Ahcyl1
chr9	56264652	56344743	uc009ptf.1	Hmg20a
chr10	83062778	83113409	uc007gkk.1	Appl2
chr9	108836660	108851686	uc009rrg.1	Uqcrc1
chr9	26812086	26839679	uc009oqd.2	Vps26b
chr7	148041295	148049630	uc009kij.1	Ric8
chr7	13617354	13622126	uc009ffc.2	Chmp2a
chr7	109414337	109585369	uc009irm.1	Stim1
chr6	91439301	91467882	uc009cyd.1	Xpc
chr19	45079503	45082932	uc008hqg.1	Mrpl43
chr2	26775560	26791031	uc008iwl.2	Surf4
chr6	87835933	87863588	uc009cug.1	Copg
chr15	98955275	99042897	uc007xox.1	Spats2
chr12	117641874	117702004	uc007pht.1	Ncapg2
chr2	90583526	90621177	uc008ktb.1	Fnbp4
chr2	151318043	151337040	uc008ndw.1	Nsfl1c
chr8	74150611	74197656	uc009mei.2	Unc13a
chr9	56783306	56786205	uc009ptq.1	Imp3
chr5	138611248	138619913	uc009aev.2	Ap4m1
chr4	43544384	43577455	uc008sqe.2	Tln1
chr1	39590398	39603722	uc007ati.1	D1Bwg0212e
chr11	62080725	62096897	uc007jip.2	Zswim7
chr2	24827989	24832618	uc008ipu.1	Mrpl41
chr7	134585649	134594672	uc009jvl.2	Zfp689
chr11	101268153	101280747	uc007los.1	Aarsd1
chr2	163818932	163844323	uc008ntp.1	Ywhab
chr2	30025043	30029589	uc008jbk.1	Endog
chr3	104589951	104597377	uc008qul.2	Rhoc
chr17	34075853	34079288	uc008cah.1	H2-Ke2
chr17	35088689	35091416	uc008cem.2	1110038B12Rik
chr11	70206382	70225533	uc007jup.2	Pelp1
chr7	135886383	135928349	uc009jzj.2	Sec23ip
chr6	40273476	40346761	uc009bmn.2	Agk
chr17	46380868	46386994	uc008csc.1	Polr1c
chr8	127384932	127413957	uc009nxv.2	Gnpat
chr4	6323353	6383418	uc012dai.1	Nsmaf
chr11	100444149	100483482	uc007lls.1	Dnajc7
chrX	94533112	94574548	uc009tut.2	Eda2r
chr11	4058356	4082544	uc007hup.2	Sf3a1
chr11	55260144	55276640	uc007izj.1	Atox1
chr12	119080333	119117179	uc007pid.1	Cdca7l
chr1	172129386	172147524	uc007dma.1	Uhmk1
chr7	125262403	125275139	uc009jjo.2	Arl6ip1
chr9	106335326	106342567	uc009rjp.1	Acy1
chr14	58415025	58423817	uc007udo.2	Gm10094
chr13	23853536	23856283	uc007puz.1	Hist1h1a
chr12	29315711	29322818	uc007nfs.2	Rps7
chr8	87365986	87372830	uc009mnp.1	Calr
chr14	79734313	79792475	uc007usv.1	Naa16
chr8	127042666	127075907	uc009nxd.2	Cog2
chr2	119915222	119982311	uc008lvd.1	Ehd4
chr8	13884787	13892271	uc009kyr.2	2410022L05Rik
chr7	4826654	4847318	uc012ewz.1	Isoc2a
chrX	7453431	7460558	uc009smz.1	Pim2
chr9	14303062	14315064	uc009oeo.1	Cwc15
chrX	100549814	100591457	uc009tzl.2	Chic1
chr3	122625314	122629112	uc008rey.1	1810037I17Rik
chr18	67363012	67367541	uc008flu.2	Chmp1b
chr1	55059947	55086322	uc007azy.1	Sf3b1
chr17	34779827	34783272	uc008cdg.1	Fkbpl
chr3	108057843	108082870	uc008qyq.1	Psma5
chr16	32097887	32108140	uc007yyf.1	1500031L02Rik
chr11	62690991	62708686	uc007jkh.1	Fam18b
chr7	39047838	39058367	uc009gkv.1	Pop4
chr8	91551142	91570061	uc009msa.2	Sall1
chrX	153881885	153931978	uc009urz.1	Sms
chr11	55281253	55303965	uc007izk.1	G3BP
chr1	94801565	94805197	uc007cbu.1	Dusp28
chr8	98388036	98414265	uc009mzi.1	Got2
chr5	92377929	92394094	uc008yby.1	Rchy1
chr13	95126914	95336271	uc007rlv.2	Ap3b1
chr11	30669774	30780361	uc007ihx.1	Psme4
chr2	152493196	152510882	uc008nfz.2	H13
chr11	77994436	77999086	uc007kil.2	Rpl23a
chr14	70713765	70753231	uc007unv.1	Slc39a14
chr3	88355637	88373647	uc008pvr.1	Ubqln4
chr11	102975638	102981038	uc007lto.1	Hexim1
chr1	138309847	138336797	uc007cuu.2	Ddx59
chr14	20630623	20645045	uc007siv.1	2700060E02Rik
chr17	65929392	65964895	uc008dgd.2	Vapa
chr9	50404444	50413954	uc009pjv.2	Sdhd
chr16	14109258	14161367	uc007ygv.2	4921513D23Rik
chr7	36177170	36183786	uc009gjt.1	C230052I12Rik
chr18	31961710	31988506	uc008ein.2	Wdr33
chr6	146498153	146528357	uc009esb.1	4933424B01Rik
chr15	81975698	82004324	uc007wyh.1	Srebf2
chr3	51285887	51300134	uc008pea.1	Rab33b
chr19	9039530	9052670	uc008goi.1	Eef1g
chr7	140827357	140864700	uc009kdc.2	2700050L05Rik
chr3	145585341	145597247	uc008rqs.1	Bcl10
chr15	35861730	35870001	uc007vmi.1	Cox6c
chrX	12232009	12252672	uc009sqy.1	1810030O07Rik
chr19	4907228	4930287	uc008gbo.2	Dpp3
chr5	143103537	143145324	uc009aiy.1	Wipi2
chr9	106071259	106094037	uc009rjc.1	Wdr82
chr10	88192158	88205947	uc007grw.1	Arl1
chr11	61058256	61082629	uc007jhf.1	Aldh3a2
chr16	18874842	18970401	uc007yoq.1	Hira
chr1	90965036	91050368	uc007byv.1	Sh3bp4
chr2	30828352	30839461	uc008jdd.2	BC005624
chr15	98475937	98495320	uc007xne.1	Ddx23
chr13	100089603	100116633	uc007rpm.1	Ptcd2
chr2	125071499	125075023	uc008mcm.1	Dut
chrX	139288016	139403271	uc009umc.1	Ammecr1
chr4	41061459	41073372	uc008sii.1	Nol6
chr5	31443033	31458663	uc008wxf.2	Mpv17
chr9	90096886	90167607	uc009rac.1	Tbc1d2b
chr11	70263432	70267228	uc007juv.1	Med11
chr4	114633217	114661833	uc008ueg.2	Cmpk1
chr7	125668575	125678827	uc009jjy.1	Coq7
chr14	26511655	26519952	uc007srr.1	Ppif
chr4	149609305	149616836	uc008vxo.2	Eno1
chr18	60718439	60732383	uc008fam.1	Rbm22
chrX	97687629	97711464	uc009tvz.2	Igbp1
chr2	3628729	3699406	uc008iek.1	Fam107b
chr15	54846683	54905707	uc007vrt.1	Taf2
chr11	84626562	84635017	uc007kqr.1	Mrm1
chr10	126324303	126340427	uc007hhg.2	Xrcc6bp1
chr4	116662821	116668980	uc008uhr.1	Urod
chr5	35102388	35255170	uc008xdc.2	Htt
chr2	180392668	180438805	uc008ojq.1	Dido1
chr15	94408378	94422255	uc007xjl.1	Twf1
chr14	70951862	70973349	uc007uoj.1	Hr
chr5	77401725	77428960	uc008xvp.1	Srp72
chr13	86184402	86188400	uc007riy.1	Cox7c
chr7	117363216	117427020	uc009jfb.2	Swap70
chr15	81694945	81704322	uc007wxo.1	Phf5a
chr11	101175564	101184844	uc007lon.1	Psme3
chr1	182832404	182838219	uc007dwv.2	Pycr2
chr9	59502414	59520766	uc009pyg.1	Pkm2
chr11	121188516	121217761	uc007mvt.2	Wdr45l
chr6	32742226	33012152	uc009bgo.1	Chchd3
chr1	135971441	135977732	uc007cre.1	Btg2
chr9	96233094	96266718	uc009rck.1	Atp1b3
chr4	138934573	139045447	uc008vmm.2	Ubr4
chr2	29788928	29814952	uc008jaq.2	Gle1
chr15	52541999	52561986	uc007vrg.1	Med30
chr15	27535675	27562448	uc007vjr.1	Fam105b
chr2	104594953	104658853	uc008lkg.2	Qser1
chr8	108459627	108464292	uc009nep.2	Psmb10
chr11	51910325	51936251	uc007ivb.1	Ppp2ca
chr6	108731052	108773717	uc009ddo.1	Arl8b
chr18	36664580	36677459	uc008enl.2	Hbegf
chr15	98761861	98766821	uc007xoj.1	Tuba1b
chr7	148066292	148084541	uc009kin.1	Psmd13
chr8	97343718	97364240	uc009mxa.1	Ciapin1
chrX	34136219	34146074	uc009sxo.1	Pgrmc1
chr13	100112740	100185516	uc007rpn.1	Mrps27
chr17	27991451	28036985	uc008bpt.1	Uhrf1bp1
chr17	57127686	57135794	uc008ddm.2	Clpp
chr5	147546387	147608532	uc009anj.1	Usp12
chr1	37945397	37955178	uc007asj.1	Mrpl30
chr16	17404092	17430919	uc007yku.1	Snap29
chr9	96371375	96381014	uc009rcm.1	Rnf7
chr11	117708550	117717057	uc007moe.1	Birc5
chr9	108206535	108240270	uc009rpe.2	Rhoa
chr10	41528379	41628242	uc007eye.2	Sesn1
chr9	59502414	59527182	uc009pyi.1	Pkm2
chr1	137623773	137648806	uc007cto.1	Csrp1
chr10	117251652	117285030	uc007hdr.1	Rap1b
chr6	51418614	51433703	uc009bxr.1	Cbx3
chr3	130398834	130414362	uc008rjc.2	Ostc
chr16	33183156	33243398	uc007yzy.2	Osbpl11
chr2	126832446	126895550	uc008men.1	Ap4e1
chr4	148857441	148870776	uc008vwl.1	Lzic
chr13	43491744	43498227	uc007qgc.1	Nol7
chr4	54958816	55096435	uc008sxi.1	Zfp462
chr8	126175828	126187780	uc009nwm.1	Rhou
chr18	77166765	77180353	uc008fqr.2	Ier3ip1
chr14	70943429	70948739	uc007uoi.1	Reep4
chr6	54764909	54840218	uc009cae.2	Znrf2
chr2	103294060	103327310	uc008liw.2	Cat
chr7	56121798	56138411	uc009haz.2	E2f8
chr9	53190127	53209972	uc009pmb.1	Kdelc2
chr13	52930478	53027046	uc007qnd.1	Auh
chr8	108292207	108353250	uc009nec.1	Ranbp10
chrX	103209038	103217789	uc009ubk.1	Cox7b
chr7	52069739	52086176	uc009gqw.2	Nup62
chr15	59203752	59433239	uc007vxv.2	Nsmce2
chr10	79142939	79151143	uc007fzi.1	Cdc34
chr16	96288274	96306035	uc008acn.2	Brwd1
chr11	62414378	62418308	uc007jjl.1	2410006H16Rik
chr4	124526002	124532486	uc008urf.2	Yrdc
chr2	26760786	26768162	uc008iwe.1	Med22
chr16	55964387	55971550	uc007zlv.2	Rpl24
chr5	116463598	116476437	uc008zew.1	Prkab1
chr11	6425621	6430763	uc007hyu.1	AK160548
chr15	77591018	77674545	uc007woc.1	Myh9
chr8	86477592	86494094	uc009mlk.1	Asf1b
chr11	119149676	119163357	uc007mqj.1	Eif4a3
chr3	69378107	69404783	uc008pmj.1	B3galnt1
chr13	49746718	49774384	uc007qju.1	Nol8
chr5	31555651	31595487	uc008wyb.1	Ift172
chr15	79499297	79503292	uc007wud.1	Tomm22
chr13	24921547	24926339	uc007pwk.1	AK140178
chr7	26414870	26445780	uc009fth.2	Bckdha
chr4	106334412	106353549	uc008tys.2	Ttc4
chr6	92119516	92136017	uc009cyu.1	Mrps25
chr2	75513575	75544698	uc008keq.1	Nfe2l2
chr11	69444472	69466799	uc007jqt.1	Fxr2
chr17	66272404	66302527	uc008dgr.2	Twsg1
chrX	162895190	162919622	uc009uwu.1	Rab9
chr11	51798647	51815968	uc007iut.2	Ube2b
chr14	52896820	52915184	uc007tpa.2	Tox4
chr1	95325145	95344229	uc007cdz.1	Hdlbp
chr2	129997371	130007100	uc008mij.1	Snrpb
chr19	4960305	4966995	uc008gbt.2	Mrpl11
chr19	43807743	43829490	uc008hot.2	Cox15
chr5	76610904	76638269	uc008xup.1	Tmem165
chr7	127819133	127878368	uc009jmx.2	BC030336
chr4	129292860	129298337	uc008uxs.1	Iqcc
chr14	56362529	56374471	uc007uao.2	2610027L16Rik
chr9	103205656	103252757	uc009rgl.1	Topbp1
chr9	57367038	57380233	uc009puz.1	Cox5a
chr7	133790822	133816293	uc009jse.2	Ccdc101
chr11	94489137	94506530	uc007kze.1	Lrrc59
chr7	148746078	148818910	uc009kls.2	Ap2a2
chr19	56603650	56624516	uc008hza.1	Dclre1a
chr19	11015970	11025756	uc008grj.2	Ccdc86
chrX	163784264	163822631	uc009uxd.1	Prps2
chr15	11911093	11927762	uc007vhj.1	Sub1
chr9	44213796	44218489	uc009pdn.1	Rps25
chr10	122113817	122382849	uc007hgh.2	Ppm1h
chr7	104627465	104689908	uc009iji.2	Ints4
chr11	109222107	109262683	uc007mce.1	Gna13
chr2	167123944	167176678	uc008nzm.1	B4galt5
chr10	85761156	85812250	uc007gnr.1	Timp3
chr9	98489149	98504098	uc009rdn.2	Mrps22
