# Supplementary figures and images for: YY1 and CTCF orchestrate a 3D chromatin looping switch during early neural lineage commitment
Source: HighWire-hosted journal article supplement (doi:10.1101/gr.215160.116), 2017-05-23

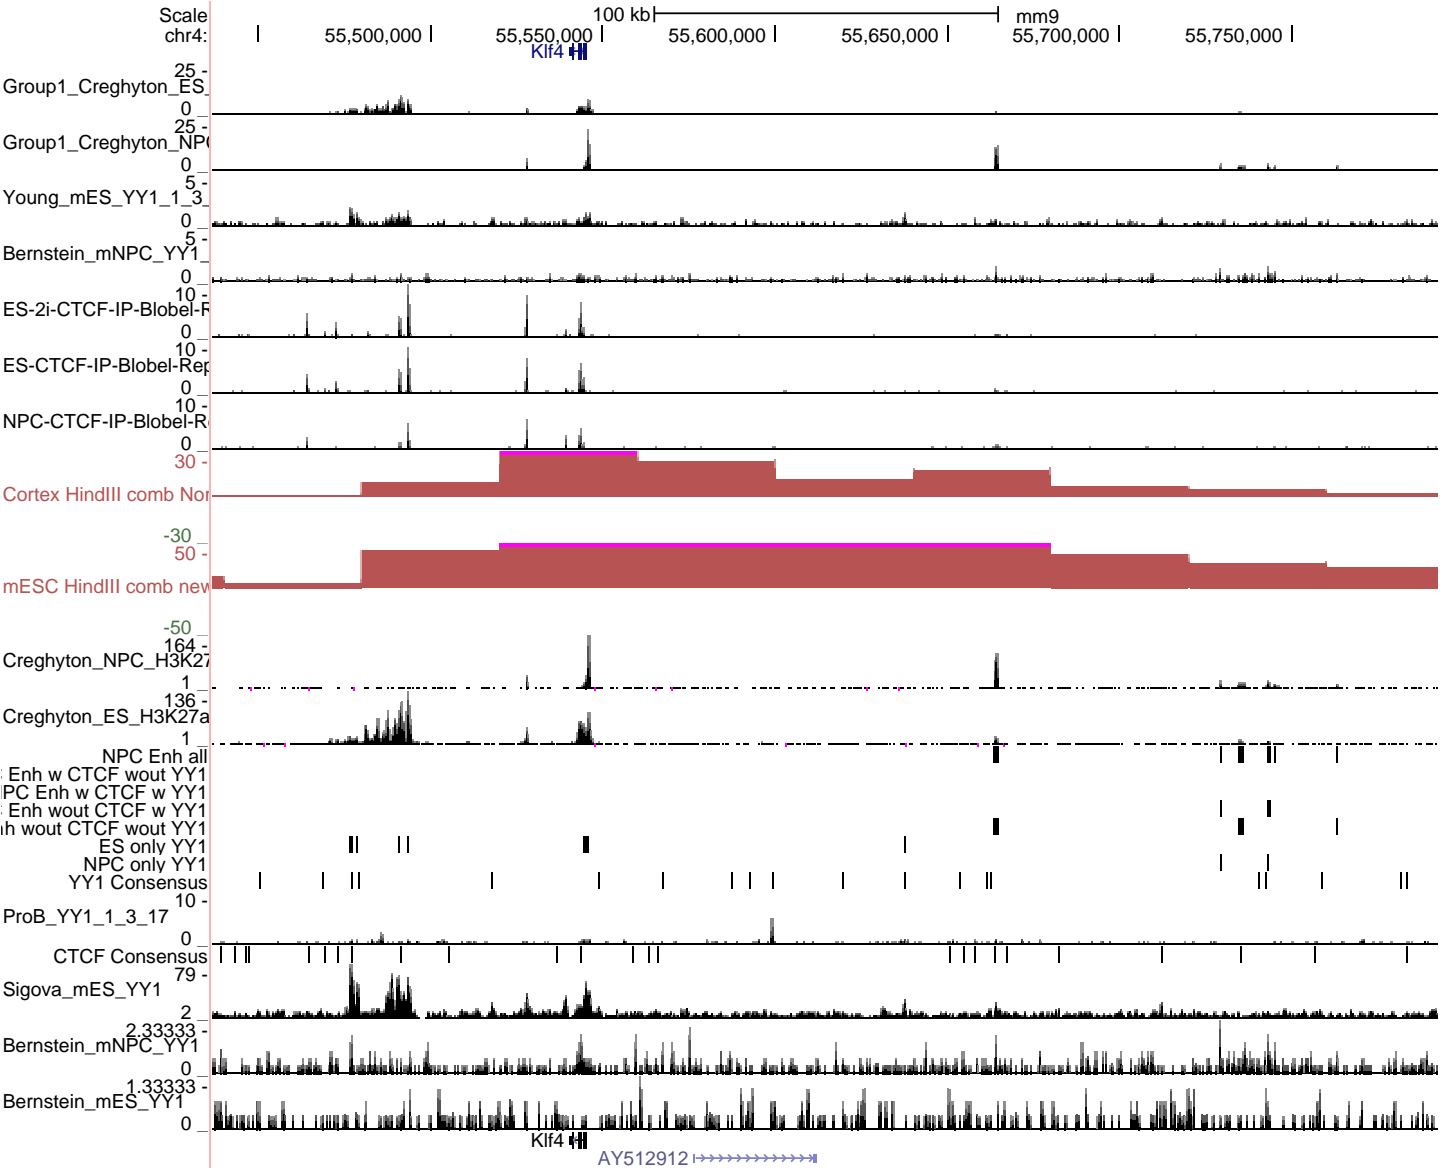

Supplement: Supplemental_custom_scripts_5C_analysis.zip [file Klf4.pdf › Fin_GR_Code_No_Plot/Sup_Fig_10_11_13_15/Klf4.pdf]

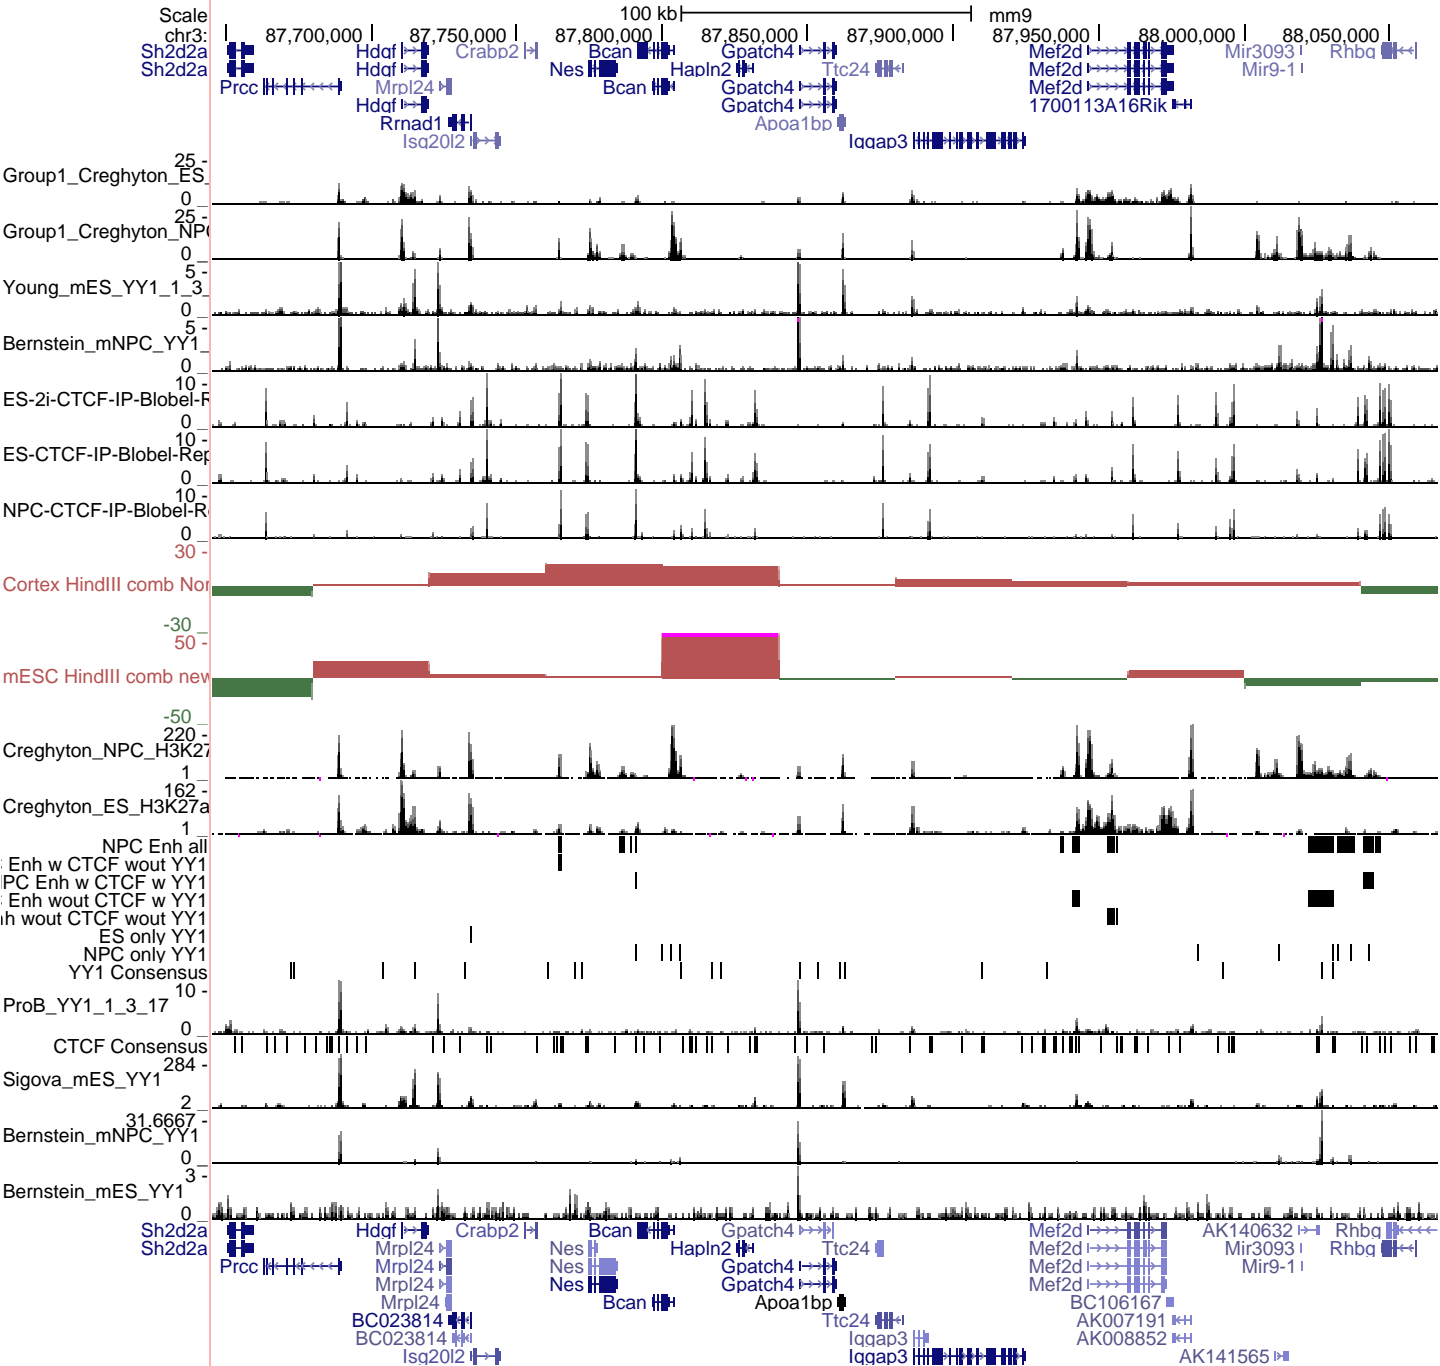

Supplement: Supplemental_custom_scripts_5C_analysis.zip [file Nes.pdf › Fin_GR_Code_No_Plot/Sup_Fig_10_11_13_15/Nes.pdf]

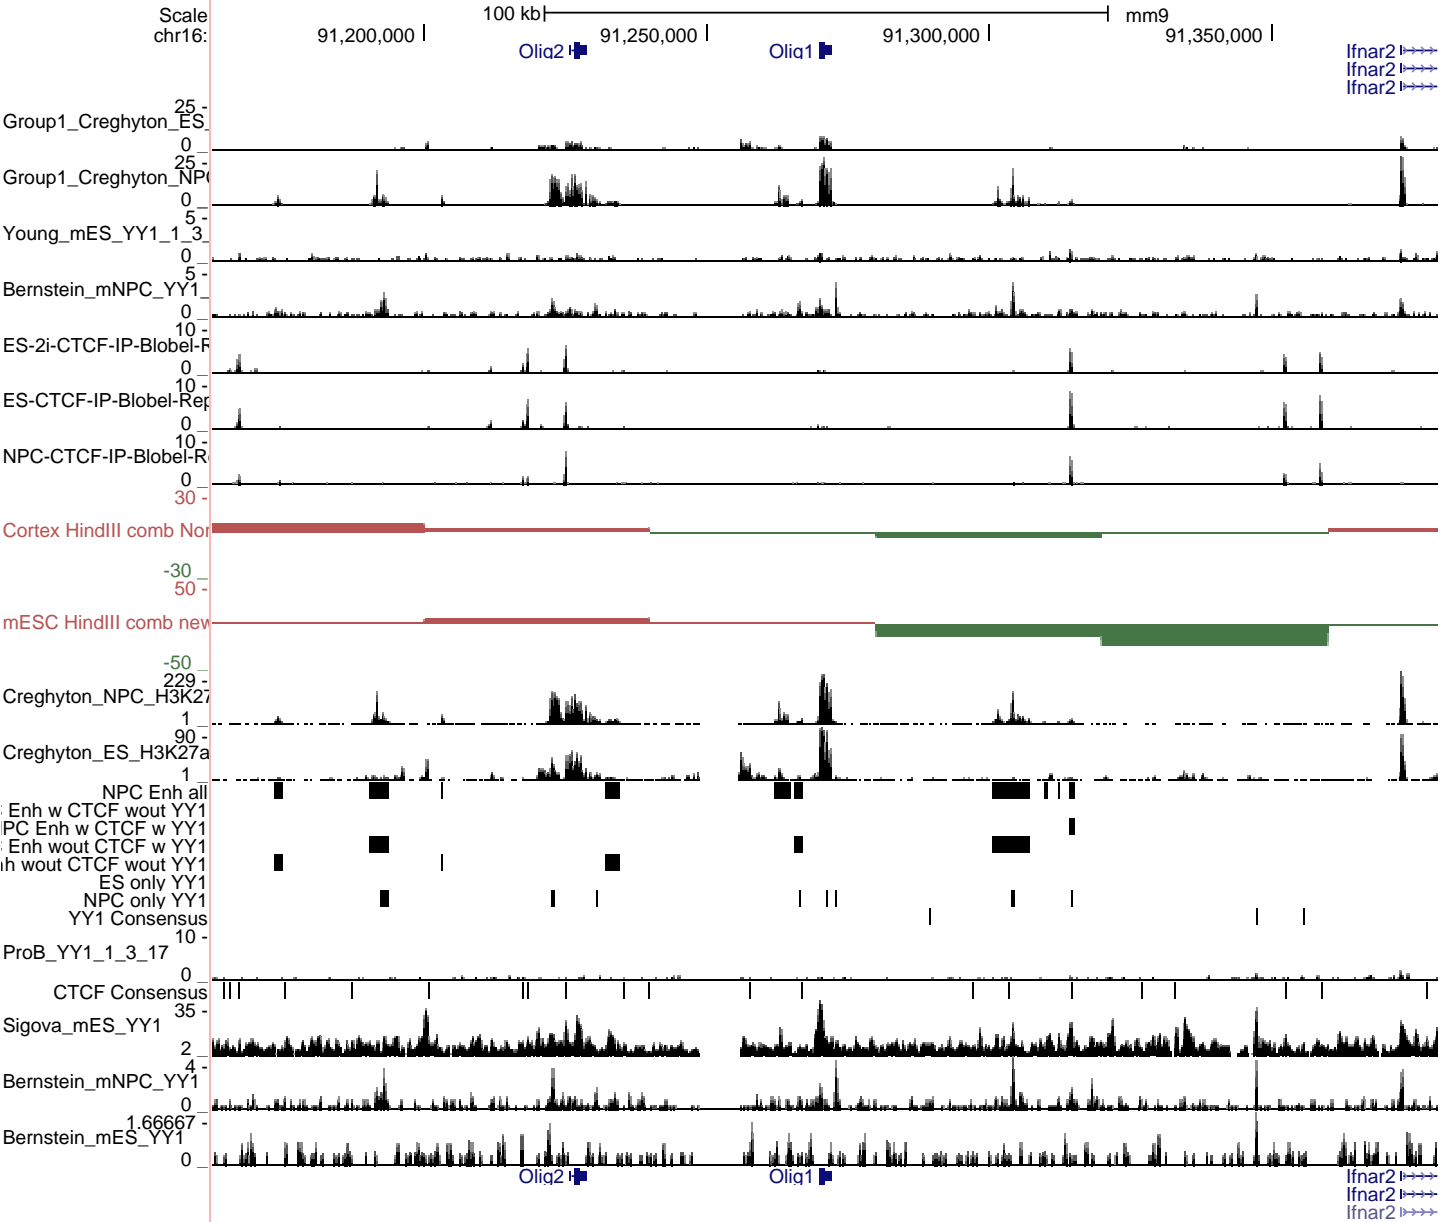

Supplement: Supplemental_custom_scripts_5C_analysis.zip [file Olig.pdf › Fin_GR_Code_No_Plot/Sup_Fig_10_11_13_15/Olig.pdf]

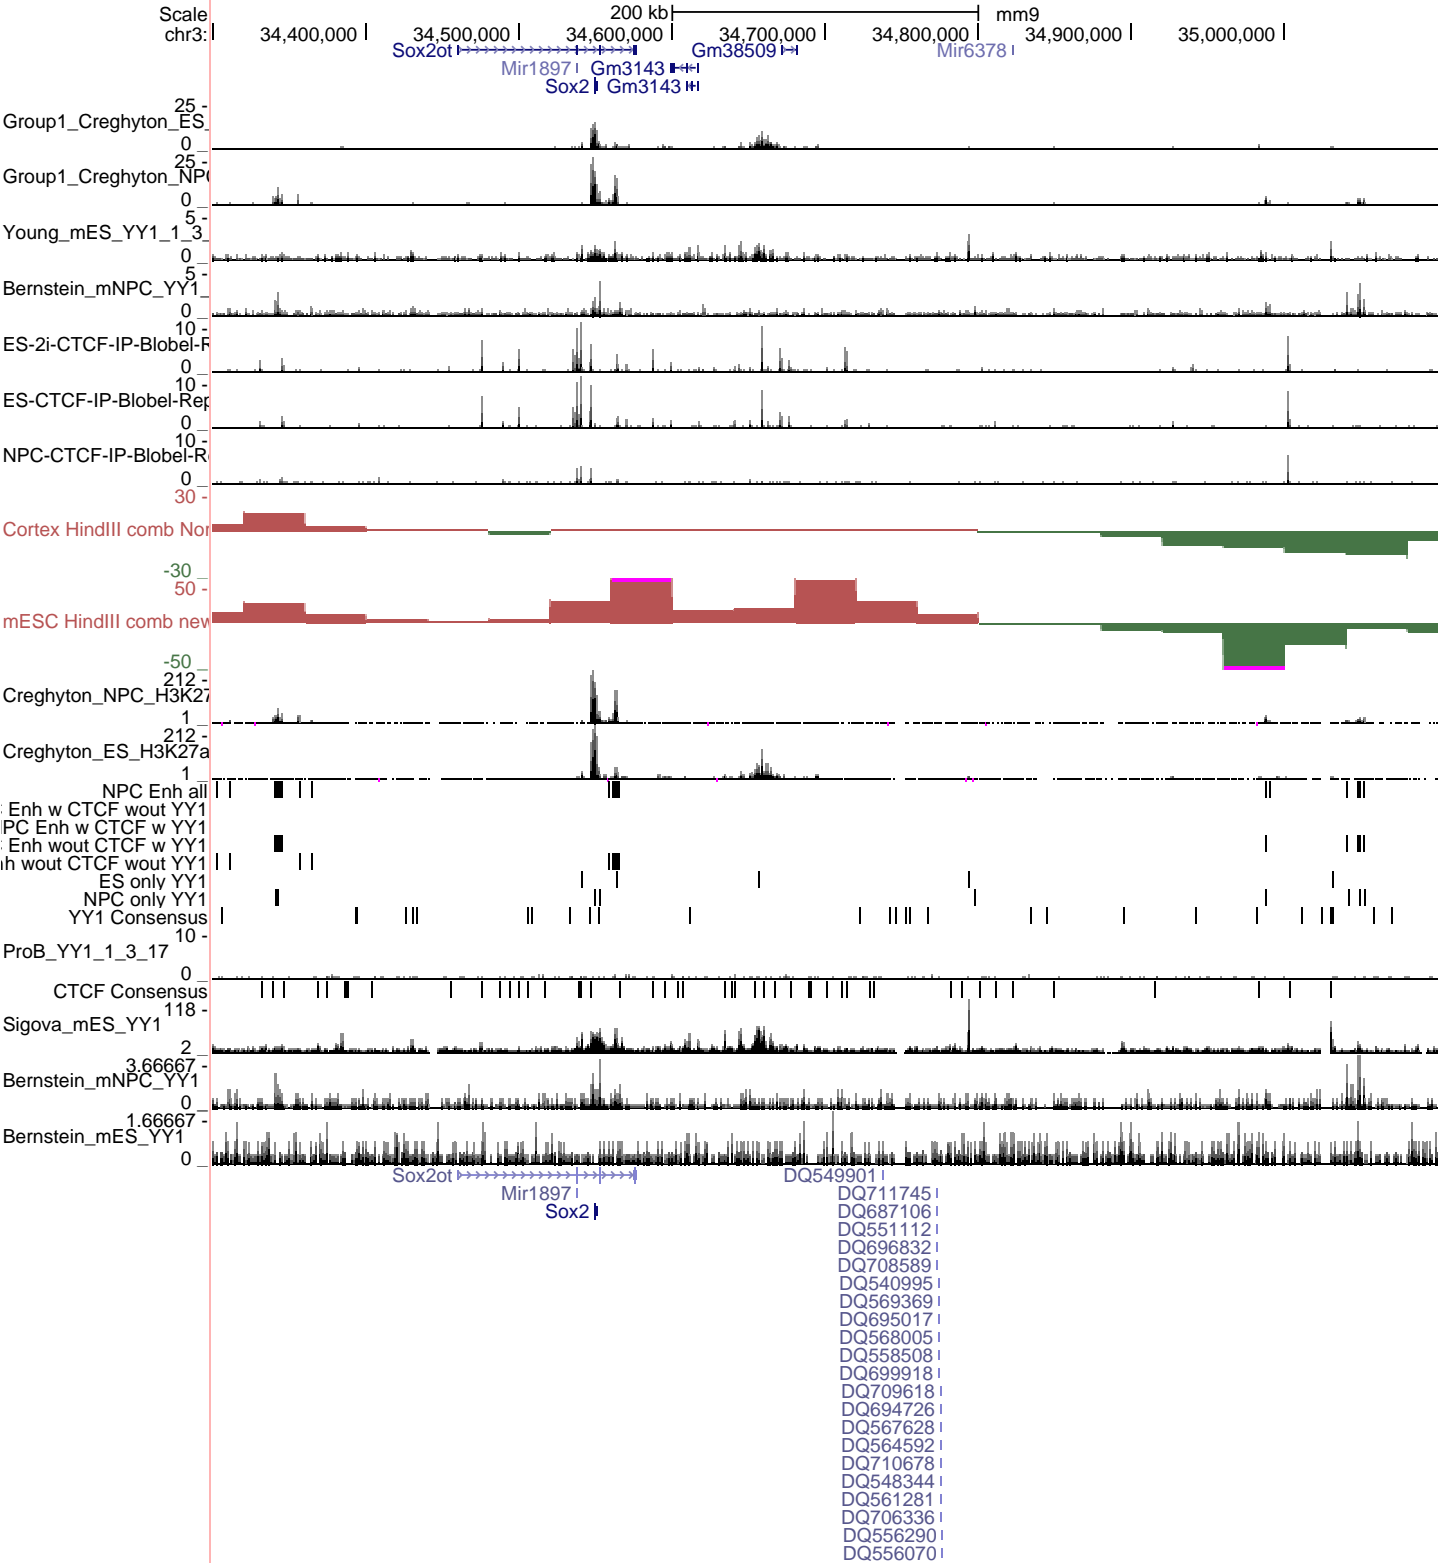

Supplement: Supplemental_custom_scripts_5C_analysis.zip [file Sox2.pdf › Fin_GR_Code_No_Plot/Sup_Fig_10_11_13_15/Sox2.pdf]
